# Supplementary material for: A Combined Transcriptomic and Proteomic Approach to Reveal the Effect of Mogroside V on OVA-Induced Pulmonary Inflammation in Mice
Source: Frontiers journal article supplement (doi:10.3389/fimmu.2022.800143), 2022-03-18
Supplement: Data_Sheet_2.ZIP [file all.samples.PC_data.xls]

id	PC1(93.9%)	PC2(2.1%)	PC3(1.8%)	PC4(1%)	PC5(0.4%)	PC6(0.4%)	PC7(0.2%)	PC8(0.1%)	PC9(0%)
K-1	-8720.77710346685	579.220507885559	1156.96593328805	418.406172580427	980.240402624475	-848.853037604579	317.660812513852	-214.838683268698	1.818387107555e-11
K-2	-8940.00830307194	-300.035806530038	994.456431683925	483.182513362611	318.537215641552	645.442548091778	-163.808948023931	558.654536311138	2.84199330735646e-11
K-3	-8856.3136627705	480.98361596102	330.636977301385	760.202949775508	-671.176529428231	811.844566016248	-209.053020116792	-449.546800357532	1.82205361909382e-11
C-1	12252.678849827	-574.401966276445	2514.74437487935	-1161.78124897071	-404.231886384681	68.0194904288367	123.831200150664	-40.6017266651174	-2.99051894359081e-11
C-2	13266.4825425319	-944.998029376407	-468.587791664438	1961.29539979271	-208.983750334374	-497.334214668427	-142.218366716566	52.4619910660145	-3.25033333581359e-11
C-3	11415.3812538137	1745.01664418007	-1325.23205626514	-280.10171516745	772.506438198357	781.089663316292	216.354269009216	-33.7178520116091	-3.28369553770358e-11
V-1	-5043.58188298967	1317.62801813919	-1005.17386622364	-314.243090552301	-1048.66156355551	-482.996894969462	503.826024947017	219.14010285606	1.26789110894282e-11
V-2	-917.095327669183	752.385112552047	-684.894472940517	-1071.15378178531	66.8470602752851	-609.459230200574	-843.738798325062	6.5292851991744	7.05546732149287e-13
V-3	-4456.76636620446	-3055.798096535	-1512.91553005898	-795.807199035491	194.922612963135	132.247109589885	197.146826561603	-98.0808531294308	1.20486398635933e-11
