# Supplementary material for: A Combined Transcriptomic and Proteomic Approach to Reveal the Effect of Mogroside V on OVA-Induced Pulmonary Inflammation in Mice
Source: Frontiers journal article supplement (doi:10.3389/fimmu.2022.800143), 2022-03-18
Supplement: Data_Sheet_2.ZIP [file C-vs-V.filter.annot.xls]

id	C-1_count	C-2_count	C-3_count	V-1_count	V-2_count	V-3_count	C-1_fpkm	C-2_fpkm	C-3_fpkm	V-1_fpkm	V-2_fpkm	V-3_fpkm	C_mean	V_mean	log2(fc)	PValue	FDR	Symbol	Description	KEGG_A_class	KEGG_B_class	Pathway	K_ID	GO Component	GO Function	GO Process
ENSMUSG00000095079	53507	54583	34171	6940	6733	8319	1950.55	2313.20	1374.43	310.50	283.71	318.38	1879.39333333333	304.196666666667	-2.62719078677967	4.33062546373198e-50	6.81077466681128e-46	Igha	immunoglobulin heavy constant alpha [Source:MGI Symbol;Acc:MGI:96444]	Environmental Information Processing;Human Diseases;Human Diseases;Environmental Information Processing;Cellular Processes;Human Diseases;Human Diseases;Environmental Information Processing;Human Diseases;Human Diseases;Human Diseases;Environmental Information Processing;Organismal Systems;Human Diseases;Human Diseases;Organismal Systems;Organismal Systems;Human Diseases;Organismal Systems;Human …	Signal transduction;Infectious diseases;Infectious diseases;Signal transduction;Transport and catabolism;Cancers;Infectious diseases;Signal transduction;Immune diseases;Infectious diseases;Infectious diseases;Signal transduction;Immune system;Immune diseases;Cardiovascular diseases;Immune system;Immune system;Cardiovascular diseases;Immune system;Immune diseases;Infectious diseases;Immune system;…	ko04151//PI3K-Akt signaling pathway;ko05169//Epstein-Barr virus infection;ko05130//Pathogenic Escherichia coli infection;ko04020//Calcium signaling pathway;ko04145//Phagosome;ko05202//Transcriptional misregulation in cancers;ko05152//Tuberculosis;ko04072//Phospholipase D signaling pathway;ko05322//Systemic lupus erythematosus;ko05150//Staphylococcus aureus infection;ko05146//Amoebiasis;ko04064//N…	K06856;K06856;K06856;K06856;K06856;K06856;K06856;K06856;K06856;K06856;K06856;K06856;K06856;K06856;K06856;K06856;K06856;K06856;K06856;K06856;K06856;K06856;K06856;K06856;K06856;K06856;K06856	GO:0009897//external side of plasma membrane;GO:0042571//immunoglobulin complex, circulating	GO:0003823//antigen binding;GO:0034987//immunoglobulin receptor binding	GO:0002385//mucosal immune response;GO:0002455//humoral immune response mediated by circulating immunoglobulin;GO:0006910//phagocytosis, recognition;GO:0006911//phagocytosis, engulfment;GO:0006958//complement activation, classical pathway;GO:0016064//immunoglobulin mediated immune response;GO:0042742//defense response to bacterium;GO:0045087//innate immune response;GO:0050853//B cell receptor sig…
ENSMUSG00000040809	108403	83577	83617	22411	20175	18726	2849.84	2541.01	2415.85	723.37	612.03	515.52	2602.23333333333	616.973333333333	-2.07647028933776	1.43350839250472e-49	1.12723932444608e-45	Chil3	chitinase-like 3 [Source:MGI Symbol;Acc:MGI:1330860]	-	-	-	-	GO:0005576//extracellular region;GO:0005634//nucleus;GO:0005635//nuclear envelope;GO:0005737//cytoplasm;GO:0005783//endoplasmic reticulum;GO:0031410//cytoplasmic vesicle;GO:0048237//rough endoplasmic reticulum lumen	GO:0004563//beta-N-acetylhexosaminidase activity;GO:0008061//chitin binding;GO:0016787//hydrolase activity;GO:0016798//hydrolase activity, acting on glycosyl bonds;GO:0030246//carbohydrate binding	GO:0000272//polysaccharide catabolic process;GO:0005975//carbohydrate metabolic process;GO:0006032//chitin catabolic process;GO:0006954//inflammatory response;GO:0008152//metabolic process
ENSMUSG00000094930	1114	1297	785	51	97	70	118.04	159.75	91.84	6.67	11.92	7.80	123.21	8.79666666666667	-3.8080185980951	7.59868805682928e-48	3.9834855689918e-44	Igkv6-25	immunoglobulin kappa chain variable 6-25 [Source:MGI Symbol;Acc:MGI:4439867]	-	-	-	-	GO:0005615//extracellular space	-	GO:0002377//immunoglobulin production;GO:0006955//immune response
ENSMUSG00000094797	2965	3419	2329	346	415	278	344.05	461.00	298.44	49.53	55.84	33.94	367.83	46.4366666666667	-2.98570282892956	1.76297855773194e-45	6.93159094436255e-42	Igkv6-15	immunoglobulin kappa variable 6-15 [Source:MGI Symbol;Acc:MGI:1330831]	-	-	-	-	GO:0005615//extracellular space	-	GO:0002377//immunoglobulin production;GO:0006955//immune response
ENSMUSG00000022584	2247	3117	2959	357	534	498	117.28	191.97	169.72	24.71	32.91	29.77	159.656666666667	29.13	-2.4543951891366	9.8917456160292e-41	3.11134966606583e-37	Ly6c2	lymphocyte antigen 6 complex, locus C2 [Source:MGI Symbol;Acc:MGI:3712069]	-	-	-	-	GO:0005886//plasma membrane;GO:0009986//cell surface;GO:0016020//membrane;GO:0031225//anchored component of membrane;GO:0045202//synapse	GO:0030550//acetylcholine receptor inhibitor activity;GO:0033130//acetylcholine receptor binding	GO:2000272//negative regulation of receptor activity
ENSMUSG00000026417	11596	12246	10976	4315	5085	5268	155.14	196.19	169.74	75.96	82.22	71.01	173.69	76.3966666666667	-1.18493309775742	4.45745452313712e-33	1.16837312142296e-29	Pigr	polymeric immunoglobulin receptor [Source:MGI Symbol;Acc:MGI:103080]	Organismal Systems	Immune system	ko04672//Intestinal immune network for IgA production	K13073	GO:0005576//extracellular region;GO:0005615//extracellular space;GO:0005886//plasma membrane;GO:0016020//membrane;GO:0016021//integral component of membrane;GO:0030133//transport vesicle;GO:0043235//receptor complex;GO:0055038//recycling endosome membrane	GO:0001792//polymeric immunoglobulin receptor activity;GO:0005154//epidermal growth factor receptor binding	GO:0001580//detection of chemical stimulus involved in sensory perception of bitter taste;GO:0002415//immunoglobulin transcytosis in epithelial cells mediated by polymeric immunoglobulin receptor;GO:0007173//epidermal growth factor receptor signaling pathway;GO:0038093//Fc receptor signaling pathway;GO:0043113//receptor clustering
ENSMUSG00000067149	64122	63625	55837	9205	16976	14632	1853.46	2137.15	1782.32	328.25	568.97	445.04	1924.31	447.42	-2.10463957877701	4.94499046995215e-32	1.11099807315625e-28	Jchain	immunoglobulin joining chain [Source:MGI Symbol;Acc:MGI:96493]	-	-	-	-	GO:0005576//extracellular region;GO:0005615//extracellular space;GO:0071748//monomeric IgA immunoglobulin complex;GO:0071750//dimeric IgA immunoglobulin complex;GO:0071751//secretory IgA immunoglobulin complex;GO:0071752//secretory dimeric IgA immunoglobulin complex;GO:0071756//pentameric IgM immunoglobulin complex	GO:0003697//single-stranded DNA binding;GO:0003823//antigen binding;GO:0019862//IgA binding;GO:0030674//protein binding, bridging;GO:0031210//phosphatidylcholine binding;GO:0034987//immunoglobulin receptor binding;GO:0042803//protein homodimerization activity;GO:0042834//peptidoglycan binding	GO:0002250//adaptive immune response;GO:0003094//glomerular filtration;GO:0006959//humoral immune response;GO:0019731//antibacterial humoral response;GO:0045087//innate immune response;GO:0060267//positive regulation of respiratory burst;GO:0065003//macromolecular complex assembly
ENSMUSG00000032315	1796	1302	1606	507	600	559	27.59	23.24	27.23	9.61	10.68	9.03	26.02	9.77333333333333	-1.41269835930514	6.32603607656734e-30	1.24361961720218e-26	Cyp1a1	cytochrome P450, family 1, subfamily a, polypeptide 1 [Source:MGI Symbol;Acc:MGI:88588]	Metabolism;Human Diseases;Metabolism;Metabolism;Metabolism;Organismal Systems;Metabolism	Global and overview maps;Cancers;Lipid metabolism;Metabolism of cofactors and vitamins;Xenobiotics biodegradation and metabolism;Endocrine system;Amino acid metabolism	ko01100//Metabolic pathways;ko05204//Chemical carcinogenesis;ko00140//Steroid hormone biosynthesis;ko00830//Retinol metabolism;ko00980//Metabolism of xenobiotics by cytochrome P450;ko04913//Ovarian Steroidogenesis;ko00380//Tryptophan metabolism	K07408;K07408;K07408;K07408;K07408;K07408;K07408	GO:0005737//cytoplasm;GO:0005739//mitochondrion;GO:0005743//mitochondrial inner membrane;GO:0005783//endoplasmic reticulum;GO:0005789//endoplasmic reticulum membrane;GO:0016020//membrane;GO:0031090//organelle membrane;GO:0043231//intracellular membrane-bounded organelle	GO:0003824//catalytic activity;GO:0004497//monooxygenase activity;GO:0005506//iron ion binding;GO:0008391//arachidonic acid monooxygenase activity;GO:0008395//steroid hydroxylase activity;GO:0016491//oxidoreductase activity;GO:0016679//oxidoreductase activity, acting on diphenols and related substances as donors;GO:0016705//oxidoreductase activity, acting on paired donors, with incorporation or r…	GO:0001666//response to hypoxia;GO:0001889//liver development;GO:0002933//lipid hydroxylation;GO:0006629//lipid metabolic process;GO:0006631//fatty acid metabolic process;GO:0006694//steroid biosynthetic process;GO:0006778//porphyrin-containing compound metabolic process;GO:0007568//aging;GO:0008202//steroid metabolic process;GO:0008210//estrogen metabolic process;GO:0008283//cell proliferation;G…
ENSMUSG00000032332	453	518	507	1076	1202	1336	1.70	2.27	2.06	4.89	5.13	5.09	2.01	5.03666666666667	1.32527375326475	8.28571164574671e-25	1.44788207836287e-21	Col12a1	collagen, type XII, alpha 1 [Source:MGI Symbol;Acc:MGI:88448]	Organismal Systems	Digestive system	ko04974//Protein digestion and absorption	K08132	GO:0005576//extracellular region;GO:0005581//collagen trimer;GO:0005595//collagen type XII trimer;GO:0005615//extracellular space;GO:0031012//extracellular matrix	GO:0005515//protein binding;GO:0030020//extracellular matrix structural constituent conferring tensile strength	GO:0003429//growth plate cartilage chondrocyte morphogenesis;GO:0007155//cell adhesion;GO:0035987//endodermal cell differentiation
ENSMUSG00000028255	34477	52037	35932	4726	9272	8683	379.81	666.17	437.13	64.23	118.44	100.65	494.37	94.44	-2.38812125173216	1.06443372591128e-23	1.67403492074067e-20	Clca1	chloride channel accessory 1 [Source:MGI Symbol;Acc:MGI:1346342]	Organismal Systems;Organismal Systems	Digestive system;Endocrine system	ko04972//Pancreatic secretion;ko04924//Renin secretion	K05027;K05027	GO:0005576//extracellular region;GO:0005615//extracellular space;GO:0005887//integral component of plasma membrane;GO:0005902//microvillus;GO:0016021//integral component of membrane;GO:0030141//secretory granule;GO:0042589//zymogen granule membrane	GO:0005229//intracellular calcium activated chloride channel activity;GO:0005254//chloride channel activity;GO:0008233//peptidase activity;GO:0008237//metallopeptidase activity;GO:0016787//hydrolase activity;GO:0046872//metal ion binding	GO:0006508//proteolysis;GO:0006811//ion transport;GO:0006816//calcium ion transport;GO:0006821//chloride transport;GO:0071456//cellular response to hypoxia;GO:1902476//chloride transmembrane transport
ENSMUSG00000073490	382	481	423	82	113	113	4.49	6.69	5.70	1.20	1.60	1.40	5.62666666666667	1.4	-2.00685367104106	6.20810661120017e-23	8.87589933403137e-20	Ifi207	interferon activated gene 207 [Source:MGI Symbol;Acc:MGI:2138302]	Organismal Systems	Immune system	ko04621//NOD-like receptor signaling pathway	K20914	GO:0005634//nucleus;GO:0005654//nucleoplasm;GO:0005730//nucleolus;GO:0005829//cytosol	GO:0000978//RNA polymerase II core promoter proximal region sequence-specific DNA binding;GO:0001227//transcriptional repressor activity, RNA polymerase II transcription regulatory region sequence-specific binding;GO:0003690//double-stranded DNA binding;GO:0008134//transcription factor binding;GO:0042802//identical protein binding	GO:0000122//negative regulation of transcription from RNA polymerase II promoter;GO:0002218//activation of innate immune response;GO:0035458//cellular response to interferon-beta
ENSMUSG00000079293	5345	5332	4792	1549	1265	2164	134.69	159.47	140.59	46.80	34.99	55.49	144.916666666667	45.76	-1.66306456958177	5.5041519476448e-22	6.65875366773922e-19	Clec7a	C-type lectin domain family 7, member a [Source:MGI Symbol;Acc:MGI:1861431]	Cellular Processes;Human Diseases;Organismal Systems	Transport and catabolism;Infectious diseases;Immune system	ko04145//Phagosome;ko05152//Tuberculosis;ko04625//C-type lectin receptor signaling pathway	K10074;K10074;K10074	GO:0005886//plasma membrane;GO:0016020//membrane;GO:0016021//integral component of membrane	GO:0001872//(1->3)-beta-D-glucan binding;GO:0005515//protein binding;GO:0030246//carbohydrate binding;GO:0046872//metal ion binding	GO:0002366//leukocyte activation involved in immune response;GO:0002367//cytokine production involved in immune response;GO:0002376//immune system process;GO:0002732//positive regulation of dendritic cell cytokine production;GO:0006954//inflammatory response;GO:0032874//positive regulation of stress-activated MAPK cascade;GO:0045087//innate immune response;GO:0050731//positive regulation of pepti…
ENSMUSG00000032661	1028	1926	1841	235	330	298	8.77	19.87	17.74	2.68	3.36	2.68	15.46	2.90666666666667	-2.41110277986908	2.2851961871982e-21	2.56709145971901e-18	Oas3	2'-5' oligoadenylate synthetase 3 [Source:MGI Symbol;Acc:MGI:2180850]	Human Diseases;Human Diseases;Organismal Systems;Human Diseases;Human Diseases;Human Diseases	Infectious diseases;Infectious diseases;Immune system;Infectious diseases;Infectious diseases;Infectious diseases	ko05168//Herpes simplex infection;ko05169//Epstein-Barr virus infection;ko04621//NOD-like receptor signaling pathway;ko05164//Influenza A;ko05160//Hepatitis C;ko05162//Measles	K14216;K14216;K14216;K14216;K14216;K14216	GO:0005634//nucleus;GO:0005654//nucleoplasm;GO:0005737//cytoplasm;GO:0005829//cytosol;GO:0005886//plasma membrane;GO:0016020//membrane	GO:0000166//nucleotide binding;GO:0001730//2'-5'-oligoadenylate synthetase activity;GO:0003723//RNA binding;GO:0003725//double-stranded RNA binding;GO:0005524//ATP binding;GO:0016740//transferase activity;GO:0016779//nucleotidyltransferase activity;GO:0046872//metal ion binding	GO:0002376//immune system process;GO:0006955//immune response;GO:0009615//response to virus;GO:0045071//negative regulation of viral genome replication;GO:0045087//innate immune response;GO:0051607//defense response to virus;GO:0060700//regulation of ribonuclease activity
ENSMUSG00000095630	1948	742	2124	122	215	217	212.53	94.09	255.94	16.42	27.20	24.92	187.52	22.8466666666667	-3.03698887862423	6.67440480594627e-21	6.56052277394481e-18	Igkv6-23	immunoglobulin kappa variable 6-23 [Source:MGI Symbol;Acc:MGI:3711980]	-	-	-	-	GO:0005615//extracellular space	-	GO:0002377//immunoglobulin production;GO:0006955//immune response
ENSMUSG00000052565	18	16	16	152	129	129	0.10	0.10	0.09	1.02	0.81	0.74	0.0966666666666667	0.856666666666667	3.14764355406631	1.4302987372363e-20	1.32319460238325e-17	H1f3	H1.3 linker histone, cluster member [Source:MGI Symbol;Acc:MGI:107502]	-	-	-	-	GO:0000786//nucleosome;GO:0000790//nuclear chromatin;GO:0005634//nucleus;GO:0005694//chromosome;GO:0005719//nuclear euchromatin	GO:0003677//DNA binding;GO:0003690//double-stranded DNA binding;GO:0005515//protein binding;GO:0031490//chromatin DNA binding;GO:0031492//nucleosomal DNA binding	GO:0000122//negative regulation of transcription from RNA polymerase II promoter;GO:0006334//nucleosome assembly;GO:0006355//regulation of transcription, DNA-templated;GO:0006357//regulation of transcription from RNA polymerase II promoter;GO:0016584//nucleosome positioning;GO:0030261//chromosome condensation;GO:0031936//negative regulation of chromatin silencing;GO:0045910//negative regulation o…
ENSMUSG00000061100	25252	41843	30238	7804	9436	8177	1700.29	3274.02	2248.37	648.27	736.70	579.35	2407.56	654.773333333333	-1.878504280525	1.88336022562452e-20	1.6455336815776e-17	Retnla	resistin like alpha [Source:MGI Symbol;Acc:MGI:1888504]	-	-	-	-	GO:0005576//extracellular region;GO:0005615//extracellular space	GO:0005179//hormone activity	GO:0007165//signal transduction
ENSMUSG00000030093	122	127	148	340	378	433	1.55	1.87	2.07	5.33	5.56	5.78	1.83	5.55666666666667	1.60237604998122	2.95939441976724e-20	2.44959979156207e-17	Wnt7a	wingless-type MMTV integration site family, member 7A [Source:MGI Symbol;Acc:MGI:98961]	Human Diseases;Human Diseases;Human Diseases;Human Diseases;Human Diseases;Human Diseases;Environmental Information Processing;Environmental Information Processing;Environmental Information Processing;Human Diseases;Human Diseases;Cellular Processes;Organismal Systems;Human Diseases	Cancers;Infectious diseases;Neurodegenerative diseases;Cancers;Cancers;Endocrine and metabolic diseases;Signal transduction;Signal transduction;Signal transduction;Cancers;Cancers;Cellular community - eukaryotes;Endocrine system;Cancers	ko05200//Pathways in cancer;ko05165//Human papillomavirus infection;ko05010//Alzheimer disease;ko05205//Proteoglycans in cancer;ko05225//Hepatocellular carcinoma;ko04934//Cushing syndrome;ko04310//Wnt signaling pathway;ko04150//mTOR signaling pathway;ko04390//Hippo signaling pathway;ko05226//Gastric cancer;ko05224//Breast cancer;ko04550//Signaling pathways regulating pluripotency of stem cells;ko…	K00572;K00572;K00572;K00572;K00572;K00572;K00572;K00572;K00572;K00572;K00572;K00572;K00572;K00572	GO:0005576//extracellular region;GO:0005615//extracellular space;GO:0005788//endoplasmic reticulum lumen;GO:0009986//cell surface;GO:0031012//extracellular matrix;GO:0098793//presynapse	GO:0005102//receptor binding;GO:0005109//frizzled binding;GO:0005125//cytokine activity;GO:0048018//receptor agonist activity	GO:0000578//embryonic axis specification;GO:0001502//cartilage condensation;GO:0001525//angiogenesis;GO:0002062//chondrocyte differentiation;GO:0007165//signal transduction;GO:0007267//cell-cell signaling;GO:0007269//neurotransmitter secretion;GO:0007275//multicellular organism development;GO:0008284//positive regulation of cell proliferation;GO:0009887//organ morphogenesis;GO:0009953//dorsal/ven…
ENSMUSG00000025804	914	718	761	340	332	394	12.99	11.86	11.94	5.96	5.47	5.89	12.2633333333333	5.77333333333333	-1.08687474624625	1.71033971194508e-19	1.34492563248802e-16	Ccr1	chemokine (C-C motif) receptor 1 [Source:MGI Symbol;Acc:MGI:104618]	Environmental Information Processing;Human Diseases;Human Diseases;Organismal Systems;Environmental Information Processing	Signaling molecules and interaction;Infectious diseases;Infectious diseases;Immune system;Signaling molecules and interaction	ko04060//Cytokine-cytokine receptor interaction;ko05163//Human cytomegalovirus infection;ko05167//Kaposi sarcoma-associated herpesvirus infection;ko04062//Chemokine signaling pathway;ko04061//Viral protein interaction with cytokine and cytokine receptor	K04176;K04176;K04176;K04176;K04176	GO:0005623//cell;GO:0005737//cytoplasm;GO:0005886//plasma membrane;GO:0009897//external side of plasma membrane;GO:0016020//membrane;GO:0016021//integral component of membrane;GO:0043025//neuronal cell body	GO:0004435//phosphatidylinositol phospholipase C activity;GO:0004930//G-protein coupled receptor activity;GO:0004950//chemokine receptor activity;GO:0005515//protein binding;GO:0016493//C-C chemokine receptor activity;GO:0019956//chemokine binding;GO:0019957//C-C chemokine binding;GO:0035717//chemokine (C-C motif) ligand 7 binding;GO:0071791//chemokine (C-C motif) ligand 5 binding	GO:0006816//calcium ion transport;GO:0006874//cellular calcium ion homeostasis;GO:0006887//exocytosis;GO:0006935//chemotaxis;GO:0006954//inflammatory response;GO:0006955//immune response;GO:0007165//signal transduction;GO:0007186//G-protein coupled receptor signaling pathway;GO:0007204//positive regulation of cytosolic calcium ion concentration;GO:0007267//cell-cell signaling;GO:0010629//negative…
ENSMUSG00000041920	447	315	294	77	100	93	7.50	6.03	5.30	1.62	2.42	1.67	6.27666666666667	1.90333333333333	-1.72147034925139	4.79660618696528e-19	3.59220121440014e-16	Slc16a6	solute carrier family 16 (monocarboxylic acid transporters), member 6 [Source:MGI Symbol;Acc:MGI:2144585]	-	-	-	-	GO:0005886//plasma membrane;GO:0016020//membrane;GO:0016021//integral component of membrane	GO:0008028//monocarboxylic acid transmembrane transporter activity;GO:0015293//symporter activity	GO:0015718//monocarboxylic acid transport;GO:0055085//transmembrane transport
ENSMUSG00000030789	6680	9054	5938	2246	2342	2691	67.53	106.98	66.33	28.18	27.77	28.35	80.28	28.1	-1.51447048625433	4.95387713173606e-18	3.5413466204915e-15	Itgax	integrin alpha X [Source:MGI Symbol;Acc:MGI:96609]	Human Diseases;Cellular Processes;Organismal Systems	Infectious diseases;Cell motility;Immune system	ko05152//Tuberculosis;ko04810//Regulation of actin cytoskeleton;ko04610//Complement and coagulation cascades	K06462;K06462;K06462	GO:0008305//integrin complex;GO:0009897//external side of plasma membrane;GO:0009986//cell surface;GO:0016020//membrane;GO:0016021//integral component of membrane	GO:0030971//receptor tyrosine kinase binding;GO:0046872//metal ion binding	GO:0007155//cell adhesion;GO:0007229//integrin-mediated signaling pathway;GO:0008284//positive regulation of cell proliferation;GO:0010628//positive regulation of gene expression;GO:0030335//positive regulation of cell migration;GO:0031643//positive regulation of myelination;GO:0034113//heterotypic cell-cell adhesion;GO:0045766//positive regulation of angiogenesis;GO:0051607//defense response to …
ENSMUSG00000076609	241900	207656	191182	29510	72036	47193	18308.51	18263.86	15979.03	2755.46	6321.79	3758.52	17517.1333333333	4278.59	-2.03355935515883	2.12236732048094e-17	1.45123786300886e-14	Igkc	immunoglobulin kappa constant [Source:MGI Symbol;Acc:MGI:96495]	-	-	-	-	-	-	-
ENSMUSG00000021356	1647	1304	1306	372	588	378	13.93	12.81	12.20	3.88	5.76	3.36	12.98	4.33333333333333	-1.58274126080448	2.32613650220543e-16	1.52429786542437e-13	Irf4	interferon regulatory factor 4 [Source:MGI Symbol;Acc:MGI:1096873]	Organismal Systems	Immune system	ko04659//Th17 cell differentiation	K09445	GO:0000788//nuclear nucleosome;GO:0005634//nucleus;GO:0005654//nucleoplasm;GO:0005829//cytosol	GO:0000978//RNA polymerase II core promoter proximal region sequence-specific DNA binding;GO:0000981//RNA polymerase II transcription factor activity, sequence-specific DNA binding;GO:0001228//transcriptional activator activity, RNA polymerase II transcription regulatory region sequence-specific binding;GO:0003677//DNA binding;GO:0003700//transcription factor activity, sequence-specific DNA bindi…	GO:0002376//immune system process;GO:0006355//regulation of transcription, DNA-templated;GO:0034122//negative regulation of toll-like receptor signaling pathway;GO:0042832//defense response to protozoan;GO:0043011//myeloid dendritic cell differentiation;GO:0043388//positive regulation of DNA binding;GO:0043966//histone H3 acetylation;GO:0043967//histone H4 acetylation;GO:0045082//positive regulat…
ENSMUSG00000078606	7855	14047	12128	3141	3344	3425	61.65	130.87	107.69	27.51	34.31	29.86	100.07	30.56	-1.7112930847469	3.23470353639308e-16	1.95662240449438e-13	Gm4070	predicted gene 4070 [Source:MGI Symbol;Acc:MGI:3782245]	-	-	-	-	GO:0005575//cellular_component;GO:0005634//nucleus;GO:0005737//cytoplasm;GO:0005829//cytosol	GO:0000166//nucleotide binding;GO:0003674//molecular_function;GO:0005525//GTP binding	GO:0008150//biological_process
ENSMUSG00000062593	1069	1121	1105	402	363	560	28.35	34.36	32.49	12.96	11.03	15.24	31.7333333333333	13.0766666666667	-1.27900423811821	3.73244001357221e-16	2.1740771886463e-13	Gm49339	predicted gene, 49339 [Source:MGI Symbol;Acc:MGI:6121530]	Organismal Systems;Organismal Systems	Immune system;Development	ko04662//B cell receptor signaling pathway;ko04380//Osteoclast differentiation	K06512;K06512	GO:0005886//plasma membrane;GO:0009897//external side of plasma membrane;GO:0016020//membrane;GO:0016021//integral component of membrane	-	GO:0001780//neutrophil homeostasis;GO:0002250//adaptive immune response;GO:0002376//immune system process;GO:0002437//inflammatory response to antigenic stimulus;GO:0006954//inflammatory response;GO:0007596//blood coagulation;GO:0009611//response to wounding;GO:0009624//response to nematode;GO:0009991//response to extracellular stimulus;GO:0032496//response to lipopolysaccharide;GO:0035739//CD4-p…
ENSMUSG00000024353	2061	2168	1583	401	739	572	91.80	112.24	78.53	22.01	38.79	26.79	94.19	29.1966666666667	-1.6897702308789	4.92543585713657e-16	2.67111481810989e-13	Mzb1	marginal zone B and B1 cell-specific protein 1 [Source:MGI Symbol;Acc:MGI:1917066]	-	-	-	-	GO:0005576//extracellular region;GO:0005737//cytoplasm;GO:0005783//endoplasmic reticulum;GO:0005788//endoplasmic reticulum lumen;GO:0034663//endoplasmic reticulum chaperone complex	GO:0003674//molecular_function;GO:0005515//protein binding	GO:0002642//positive regulation of immunoglobulin biosynthetic process;GO:0008284//positive regulation of cell proliferation;GO:0030888//regulation of B cell proliferation;GO:0033622//integrin activation;GO:0042127//regulation of cell proliferation;GO:0046626//regulation of insulin receptor signaling pathway
ENSMUSG00000020053	836	1129	894	328	308	382	6.72	15.27	8.92	2.33	3.13	2.79	10.3033333333333	2.75	-1.90560762972504	1.2670656778802e-15	6.64238063867396e-13	Igf1	insulin-like growth factor 1 [Source:MGI Symbol;Acc:MGI:96432]	Human Diseases;Environmental Information Processing;Human Diseases;Environmental Information Processing;Environmental Information Processing;Environmental Information Processing;Human Diseases;Human Diseases;Cellular Processes;Environmental Information Processing;Human Diseases;Cellular Processes;Environmental Information Processing;Organismal Systems;Environmental Information Processing;Environm…	Cancers;Signal transduction;Cancers;Signal transduction;Signal transduction;Signal transduction;Cardiovascular diseases;Cancers;Cellular community - eukaryotes;Signal transduction;Cancers;Cellular community - eukaryotes;Signal transduction;Sensory system;Signal transduction;Signal transduction;Cell growth and death;Endocrine system;Cancers;Drug resistance;Cardiovascular diseases;Endocrine system;…	ko05200//Pathways in cancer;ko04151//PI3K-Akt signaling pathway;ko05202//Transcriptional misregulation in cancers;ko04010//MAPK signaling pathway;ko04014//Ras signaling pathway;ko04015//Rap1 signaling pathway;ko05414//Dilated cardiomyopathy (DCM);ko05205//Proteoglycans in cancer;ko04510//Focal adhesion;ko04150//mTOR signaling pathway;ko05224//Breast cancer;ko04550//Signaling pathways regulating p…	K05459;K05459;K05459;K05459;K05459;K05459;K05459;K05459;K05459;K05459;K05459;K05459;K05459;K05459;K05459;K05459;K05459;K05459;K05459;K05459;K05459;K05459;K05459;K05459;K05459;K05459;K05459;K05459;K05459;K05459;K05459	GO:0005576//extracellular region;GO:0005614//interstitial matrix;GO:0005615//extracellular space;GO:0005623//cell;GO:0005737//cytoplasm;GO:0005886//plasma membrane;GO:0031091//platelet alpha granule;GO:0035867//alphav-beta3 integrin-IGF-1-IGF1R complex;GO:0042567//insulin-like growth factor ternary complex;GO:0043025//neuronal cell body;GO:0070382//exocytic vesicle	GO:0005158//insulin receptor binding;GO:0005159//insulin-like growth factor receptor binding;GO:0005178//integrin binding;GO:0005179//hormone activity;GO:0005496//steroid binding;GO:0005515//protein binding;GO:0008083//growth factor activity;GO:0043539//protein serine/threonine kinase activator activity	GO:0000187//activation of MAPK activity;GO:0001649//osteoblast differentiation;GO:0001775//cell activation;GO:0001932//regulation of protein phosphorylation;GO:0001974//blood vessel remodeling;GO:0002683//negative regulation of immune system process;GO:0006417//regulation of translation;GO:0007165//signal transduction;GO:0007399//nervous system development;GO:0007608//sensory perception of smell;…
ENSMUSG00000016283	180	421	181	13	30	20	5.49	15.01	6.11	0.50	1.02	0.65	8.87	0.723333333333333	-3.61620156257774	1.60927488337008e-15	7.9090831533629e-13	H2-M2	histocompatibility 2, M region locus 2 [Source:MGI Symbol;Acc:MGI:95914]	Human Diseases;Human Diseases;Human Diseases;Cellular Processes;Cellular Processes;Human Diseases;Human Diseases;Human Diseases;Human Diseases;Human Diseases;Human Diseases;Human Diseases;Human Diseases;Cellular Processes;Environmental Information Processing;Organismal Systems;Human Diseases;Human Diseases	Infectious diseases;Infectious diseases;Infectious diseases;Transport and catabolism;Transport and catabolism;Infectious diseases;Infectious disease: viral;Infectious diseases;Cancers;Infectious diseases;Cardiovascular diseases;Immune diseases;Immune diseases;Cell growth and death;Signaling molecules and interaction;Immune system;Endocrine and metabolic diseases;Immune diseases	ko05168//Herpes simplex infection;ko05169//Epstein-Barr virus infection;ko05165//Human papillomavirus infection;ko04145//Phagosome;ko04144//Endocytosis;ko05163//Human cytomegalovirus infection;ko05170//Human immunodeficiency virus 1 infection;ko05166//HTLV-I infection;ko05203//Viral carcinogenesis;ko05167//Kaposi sarcoma-associated herpesvirus infection;ko05416//Viral myocarditis;ko05320//Autoimm…	K06751;K06751;K06751;K06751;K06751;K06751;K06751;K06751;K06751;K06751;K06751;K06751;K06751;K06751;K06751;K06751;K06751;K06751	GO:0005615//extracellular space;GO:0009897//external side of plasma membrane;GO:0009986//cell surface;GO:0016020//membrane;GO:0016021//integral component of membrane	-	GO:0001916//positive regulation of T cell mediated cytotoxicity;GO:0002476//antigen processing and presentation of endogenous peptide antigen via MHC class Ib
ENSMUSG00000095642	1572	921	1032	92	133	314	158.63	107.97	115.01	11.45	15.56	33.36	127.203333333333	20.1233333333333	-2.66019527105861	2.86504919177285e-15	1.36541298906096e-12	Ighv14-3	immunoglobulin heavy variable V14-3 [Source:MGI Symbol;Acc:MGI:4439764]	Environmental Information Processing;Human Diseases;Human Diseases;Environmental Information Processing;Cellular Processes;Human Diseases;Human Diseases;Environmental Information Processing;Human Diseases;Human Diseases;Human Diseases;Environmental Information Processing;Organismal Systems;Human Diseases;Human Diseases;Organismal Systems;Organismal Systems;Human Diseases;Organismal Systems;Human …	Signal transduction;Infectious diseases;Infectious diseases;Signal transduction;Transport and catabolism;Cancers;Infectious diseases;Signal transduction;Immune diseases;Infectious diseases;Infectious diseases;Signal transduction;Immune system;Immune diseases;Cardiovascular diseases;Immune system;Immune system;Cardiovascular diseases;Immune system;Immune diseases;Infectious diseases;Immune system;…	ko04151//PI3K-Akt signaling pathway;ko05169//Epstein-Barr virus infection;ko05130//Pathogenic Escherichia coli infection;ko04020//Calcium signaling pathway;ko04145//Phagosome;ko05202//Transcriptional misregulation in cancers;ko05152//Tuberculosis;ko04072//Phospholipase D signaling pathway;ko05322//Systemic lupus erythematosus;ko05150//Staphylococcus aureus infection;ko05146//Amoebiasis;ko04064//N…	K06856;K06856;K06856;K06856;K06856;K06856;K06856;K06856;K06856;K06856;K06856;K06856;K06856;K06856;K06856;K06856;K06856;K06856;K06856;K06856;K06856;K06856;K06856;K06856;K06856;K06856;K06856	GO:0009897//external side of plasma membrane;GO:0042571//immunoglobulin complex, circulating	GO:0003823//antigen binding;GO:0034987//immunoglobulin receptor binding	GO:0006910//phagocytosis, recognition;GO:0006911//phagocytosis, engulfment;GO:0006958//complement activation, classical pathway;GO:0042742//defense response to bacterium;GO:0045087//innate immune response;GO:0050853//B cell receptor signaling pathway;GO:0050871//positive regulation of B cell activation
ENSMUSG00000078763	582	704	651	249	261	285	12.57	17.67	15.53	6.64	6.54	6.48	15.2566666666667	6.55333333333333	-1.21913897026008	3.3546024316367e-15	1.55170095418678e-12	Slfn1	schlafen 1 [Source:MGI Symbol;Acc:MGI:1313259]	-	-	-	-	GO:0005634//nucleus;GO:0005737//cytoplasm	GO:0005515//protein binding	GO:0000122//negative regulation of transcription from RNA polymerase II promoter;GO:0001933//negative regulation of protein phosphorylation;GO:0007050//cell cycle arrest;GO:0008285//negative regulation of cell proliferation;GO:0042130//negative regulation of T cell proliferation;GO:1900477//negative regulation of G1/S transition of mitotic cell cycle by negative regulation of transcription from R…
ENSMUSG00000041481	1219	1167	1535	494	589	661	25.24	28.08	35.09	12.61	14.14	14.50	29.47	13.75	-1.09981544182462	9.11502192893854e-15	4.09576999646904e-12	Serpina3g	serine (or cysteine) peptidase inhibitor, clade A, member 3G [Source:MGI Symbol;Acc:MGI:105046]	-	-	-	-	GO:0005615//extracellular space	-	-
ENSMUSG00000010651	52	21	37	229	176	194	1.25	0.59	0.98	6.73	4.87	4.87	0.94	5.49	2.54607348732756	1.06020596771648e-14	4.63162757063253e-12	Acaa1b	acetyl-Coenzyme A acyltransferase 1B [Source:MGI Symbol;Acc:MGI:3605455]	Metabolism;Organismal Systems;Cellular Processes;Metabolism;Metabolism;Metabolism;Metabolism;Metabolism	Global and overview maps;Endocrine system;Transport and catabolism;Global and overview maps;Amino acid metabolism;Lipid metabolism;Lipid metabolism;Lipid metabolism	ko01100//Metabolic pathways;ko03320//PPAR signaling pathway;ko04146//Peroxisome;ko01212//Fatty acid metabolism;ko00280//Valine, leucine and isoleucine degradation;ko00071//Fatty acid degradation;ko01040//Biosynthesis of unsaturated fatty acids;ko00592//alpha-Linolenic acid metabolism	K07513;K07513;K07513;K07513;K07513;K07513;K07513;K07513	GO:0005739//mitochondrion;GO:0005777//peroxisome	GO:0003824//catalytic activity;GO:0003985//acetyl-CoA C-acetyltransferase activity;GO:0003988//acetyl-CoA C-acyltransferase activity;GO:0016740//transferase activity;GO:0016746//transferase activity, transferring acyl groups;GO:0016747//transferase activity, transferring acyl groups other than amino-acyl groups;GO:0050633//acetyl-CoA C-myristoyltransferase activity	GO:0006629//lipid metabolic process;GO:0006631//fatty acid metabolic process;GO:0006635//fatty acid beta-oxidation;GO:0010124//phenylacetate catabolic process
ENSMUSG00000104213	597	603	513	1173	1186	1116	13.31	15.62	12.75	32.50	30.77	26.18	13.8933333333333	29.8166666666667	1.10172620466077	2.14409918141805e-14	8.87374942793728e-12	Ighd	immunoglobulin heavy constant delta [Source:MGI Symbol;Acc:MGI:96447]	Environmental Information Processing;Human Diseases;Human Diseases;Environmental Information Processing;Cellular Processes;Human Diseases;Human Diseases;Environmental Information Processing;Human Diseases;Human Diseases;Human Diseases;Environmental Information Processing;Organismal Systems;Human Diseases;Human Diseases;Organismal Systems;Organismal Systems;Human Diseases;Organismal Systems;Human …	Signal transduction;Infectious diseases;Infectious diseases;Signal transduction;Transport and catabolism;Cancers;Infectious diseases;Signal transduction;Immune diseases;Infectious diseases;Infectious diseases;Signal transduction;Immune system;Immune diseases;Cardiovascular diseases;Immune system;Immune system;Cardiovascular diseases;Immune system;Immune diseases;Infectious diseases;Immune system;…	ko04151//PI3K-Akt signaling pathway;ko05169//Epstein-Barr virus infection;ko05130//Pathogenic Escherichia coli infection;ko04020//Calcium signaling pathway;ko04145//Phagosome;ko05202//Transcriptional misregulation in cancers;ko05152//Tuberculosis;ko04072//Phospholipase D signaling pathway;ko05322//Systemic lupus erythematosus;ko05150//Staphylococcus aureus infection;ko05146//Amoebiasis;ko04064//N…	K06856;K06856;K06856;K06856;K06856;K06856;K06856;K06856;K06856;K06856;K06856;K06856;K06856;K06856;K06856;K06856;K06856;K06856;K06856;K06856;K06856;K06856;K06856;K06856;K06856;K06856;K06856	GO:0009897//external side of plasma membrane;GO:0016020//membrane;GO:0016021//integral component of membrane;GO:0019815//B cell receptor complex;GO:0042571//immunoglobulin complex, circulating	GO:0003823//antigen binding;GO:0034987//immunoglobulin receptor binding	GO:0006910//phagocytosis, recognition;GO:0006911//phagocytosis, engulfment;GO:0006958//complement activation, classical pathway;GO:0016064//immunoglobulin mediated immune response;GO:0016446//somatic hypermutation of immunoglobulin genes;GO:0030890//positive regulation of B cell proliferation;GO:0042742//defense response to bacterium;GO:0045087//innate immune response;GO:0050776//regulation of im…
ENSMUSG00000015437	355	623	634	111	110	152	9.95	20.30	19.63	3.84	3.58	4.48	16.6266666666667	3.96666666666667	-2.06749989163437	2.58395028509938e-14	1.0419945162502e-11	Gzmb	granzyme B [Source:MGI Symbol;Acc:MGI:109267]	Human Diseases;Organismal Systems;Human Diseases;Human Diseases;Cellular Processes;Human Diseases;Human Diseases	Cancers;Immune system;Immune diseases;Immune diseases;Cell growth and death;Endocrine and metabolic diseases;Immune diseases	ko05202//Transcriptional misregulation in cancers;ko04650//Natural killer cell mediated cytotoxicity;ko05320//Autoimmune thyroid disease;ko05330//Allograft rejection;ko04210//Apoptosis;ko04940//Type I diabetes mellitus;ko05332//Graft-versus-host disease	K01353;K01353;K01353;K01353;K01353;K01353;K01353	GO:0005737//cytoplasm;GO:0005829//cytosol;GO:0044194//cytolytic granule	GO:0004252//serine-type endopeptidase activity;GO:0005515//protein binding;GO:0008233//peptidase activity;GO:0008236//serine-type peptidase activity;GO:0016787//hydrolase activity	GO:0001913//T cell mediated cytotoxicity;GO:0006508//proteolysis;GO:0006915//apoptotic process;GO:0008626//granzyme-mediated apoptotic signaling pathway;GO:0019835//cytolysis
ENSMUSG00000027199	1108	1432	1166	392	466	588	18.67	28.22	22.33	8.15	9.11	10.43	23.0733333333333	9.23	-1.32182388779852	3.12259648351612e-14	1.22772687240645e-11	Gatm	glycine amidinotransferase (L-arginine:glycine amidinotransferase) [Source:MGI Symbol;Acc:MGI:1914342]	Metabolism;Metabolism;Metabolism	Global and overview maps;Amino acid metabolism;Amino acid metabolism	ko01100//Metabolic pathways;ko00330//Arginine and proline metabolism;ko00260//Glycine, serine and threonine metabolism	K00613;K00613;K00613	GO:0005739//mitochondrion;GO:0005743//mitochondrial inner membrane;GO:0005758//mitochondrial intermembrane space;GO:0016020//membrane	GO:0015067//amidinotransferase activity;GO:0015068//glycine amidinotransferase activity;GO:0016740//transferase activity	GO:0006600//creatine metabolic process;GO:0006601//creatine biosynthetic process;GO:0007275//multicellular organism development;GO:0007584//response to nutrient;GO:0007611//learning or memory;GO:0010033//response to organic substance;GO:0014889//muscle atrophy;GO:0043434//response to peptide hormone;GO:0046689//response to mercury ion
ENSMUSG00000047730	6125	7127	5616	1374	2647	2261	31.11	42.06	35.17	10.28	16.50	13.14	36.1133333333333	13.3066666666667	-1.44038237013379	3.93796763813998e-14	1.51054675719579e-11	Fcgbp	Fc fragment of IgG binding protein [Source:MGI Symbol;Acc:MGI:2444336]	-	-	-	-	GO:0031012//extracellular matrix	GO:0005515//protein binding	GO:0008150//biological_process
ENSMUSG00000039146	250	628	626	56	90	64	7.32	21.36	20.23	2.02	3.05	1.97	16.3033333333333	2.34666666666667	-2.79648213070049	4.64753327176108e-14	1.74027989916635e-11	Ifi44l	interferon-induced protein 44 like [Source:MGI Symbol;Acc:MGI:95975]	-	-	-	-	-	-	-
ENSMUSG00000023903	301	218	284	83	100	90	2.75	2.27	2.80	0.91	1.14	0.94	2.60666666666667	0.996666666666667	-1.38702312310925	6.49078568588431e-14	2.37396712748611e-11	Mmp25	matrix metallopeptidase 25 [Source:MGI Symbol;Acc:MGI:2443938]	Organismal Systems	Endocrine system	ko04928//Parathyroid hormone synthesis, secretion and action	K08003	GO:0005615//extracellular space;GO:0005886//plasma membrane;GO:0009986//cell surface;GO:0016020//membrane;GO:0016021//integral component of membrane;GO:0031012//extracellular matrix;GO:0031225//anchored component of membrane	GO:0004222//metalloendopeptidase activity;GO:0008233//peptidase activity;GO:0008237//metallopeptidase activity;GO:0008270//zinc ion binding;GO:0016504//peptidase activator activity;GO:0016787//hydrolase activity;GO:0046872//metal ion binding	GO:0006508//proteolysis;GO:0010952//positive regulation of peptidase activity;GO:0030198//extracellular matrix organization;GO:0030574//collagen catabolic process;GO:0060022//hard palate development
ENSMUSG00000023067	2686	1738	2608	661	938	1094	57.74	43.76	62.04	17.67	23.81	25.11	54.5133333333333	22.1966666666667	-1.29626610020322	9.688379920336e-14	3.38598113349165e-11	Cdkn1a	cyclin-dependent kinase inhibitor 1A (P21) [Source:MGI Symbol;Acc:MGI:104556]	Human Diseases;Environmental Information Processing;Human Diseases;Human Diseases;Human Diseases;Human Diseases;Human Diseases;Human Diseases;Human Diseases;Human Diseases;Environmental Information Processing;Cellular Processes;Human Diseases;Human Diseases;Human Diseases;Human Diseases;Human Diseases;Organismal Systems;Human Diseases;Human Diseases;Environmental Information Processing;Cellular P…	Cancers;Signal transduction;Infectious diseases;Infectious diseases;Cancers;Infectious diseases;Infectious diseases;Cancers;Infectious diseases;Cancers;Signal transduction;Cell growth and death;Cancers;Infectious diseases;Infectious diseases;Cancers;Endocrine and metabolic diseases;Endocrine system;Cancers;Cancers;Signal transduction;Cell growth and death;Signal transduction;Endocrine system;Canc…	ko05200//Pathways in cancer;ko04151//PI3K-Akt signaling pathway;ko05169//Epstein-Barr virus infection;ko05165//Human papillomavirus infection;ko05202//Transcriptional misregulation in cancers;ko05163//Human cytomegalovirus infection;ko05166//HTLV-I infection;ko05203//Viral carcinogenesis;ko05167//Kaposi sarcoma-associated herpesvirus infection;ko05205//Proteoglycans in cancer;ko04630//Jak-STAT si…	K06625;K06625;K06625;K06625;K06625;K06625;K06625;K06625;K06625;K06625;K06625;K06625;K06625;K06625;K06625;K06625;K06625;K06625;K06625;K06625;K06625;K06625;K06625;K06625;K06625;K06625;K06625;K06625;K06625;K06625;K06625;K06625;K06625;K06625;K06625;K06625;K06625;K06625;K06625;K06625;K06625	GO:0000307//cyclin-dependent protein kinase holoenzyme complex;GO:0005634//nucleus;GO:0005654//nucleoplasm;GO:0005730//nucleolus;GO:0005737//cytoplasm;GO:0005829//cytosol;GO:0016604//nuclear body;GO:0032991//macromolecular complex;GO:0048471//perinuclear region of cytoplasm;GO:0070557//PCNA-p21 complex	GO:0004860//protein kinase inhibitor activity;GO:0004861//cyclin-dependent protein serine/threonine kinase inhibitor activity;GO:0005515//protein binding;GO:0016301//kinase activity;GO:0019901//protein kinase binding;GO:0019912//cyclin-dependent protein kinase activating kinase activity;GO:0030332//cyclin binding;GO:0031625//ubiquitin protein ligase binding;GO:0044877//macromolecular complex bind…	GO:0000079//regulation of cyclin-dependent protein serine/threonine kinase activity;GO:0000082//G1/S transition of mitotic cell cycle;GO:0000086//G2/M transition of mitotic cell cycle;GO:0006606//protein import into nucleus;GO:0006974//cellular response to DNA damage stimulus;GO:0006977//DNA damage response, signal transduction by p53 class mediator resulting in cell cycle arrest;GO:0006978//DNA …
ENSMUSG00000038642	14185	15284	12713	4457	4303	7490	421.52	527.79	417.18	163.40	148.26	234.20	455.496666666667	181.953333333333	-1.32387201521138	1.03264753774736e-13	3.53053213612015e-11	Ctss	cathepsin S [Source:MGI Symbol;Acc:MGI:107341]	Cellular Processes;Human Diseases;Cellular Processes;Cellular Processes;Organismal Systems	Transport and catabolism;Infectious diseases;Cell growth and death;Transport and catabolism;Immune system	ko04145//Phagosome;ko05152//Tuberculosis;ko04210//Apoptosis;ko04142//Lysosome;ko04612//Antigen processing and presentation	K01368;K01368;K01368;K01368;K01368	GO:0005576//extracellular region;GO:0005615//extracellular space;GO:0005764//lysosome;GO:0005770//late endosome;GO:0009986//cell surface;GO:0016020//membrane;GO:0031905//early endosome lumen;GO:0043231//intracellular membrane-bounded organelle	GO:0001968//fibronectin binding;GO:0004197//cysteine-type endopeptidase activity;GO:0005518//collagen binding;GO:0008233//peptidase activity;GO:0008234//cysteine-type peptidase activity;GO:0016787//hydrolase activity;GO:0043236//laminin binding;GO:0043394//proteoglycan binding	GO:0002250//adaptive immune response;GO:0006508//proteolysis;GO:0006955//immune response;GO:0010447//response to acidic pH;GO:0016485//protein processing;GO:0030574//collagen catabolic process;GO:0034769//basement membrane disassembly;GO:0045453//bone resorption;GO:0048002//antigen processing and presentation of peptide antigen;GO:0050729//positive regulation of inflammatory response;GO:0051603//…
ENSMUSG00000042985	699	398	539	1348	1624	2998	7.97	5.28	6.79	18.97	21.48	35.98	6.68	25.4766666666667	1.93125652182085	1.11512059602644e-13	3.73138332206548e-11	Upk3b	uroplakin 3B [Source:MGI Symbol;Acc:MGI:2140882]	-	-	-	-	GO:0016020//membrane;GO:0016021//integral component of membrane	-	GO:0010629//negative regulation of gene expression
ENSMUSG00000038119	553	443	551	801	982	1055	3.44	2.85	3.86	7.41	6.90	7.65	3.38333333333333	7.32	1.11339832693266	1.55187043814092e-13	4.980870689927e-11	Cdon	cell adhesion molecule-related/down-regulated by oncogenes [Source:MGI Symbol;Acc:MGI:1926387]	Environmental Information Processing	Signal transduction	ko04340//Hedgehog signaling pathway	K20033	GO:0005886//plasma membrane;GO:0005887//integral component of plasma membrane;GO:0009986//cell surface;GO:0016020//membrane;GO:0016021//integral component of membrane	GO:0005515//protein binding	GO:0001708//cell fate specification;GO:0001934//positive regulation of protein phosphorylation;GO:0002088//lens development in camera-type eye;GO:0007155//cell adhesion;GO:0007224//smoothened signaling pathway;GO:0007520//myoblast fusion;GO:0009952//anterior/posterior pattern specification;GO:0010172//embryonic body morphogenesis;GO:0014816//skeletal muscle satellite cell differentiation;GO:00162…
ENSMUSG00000024014	1883	1639	2226	734	963	1011	33.46	35.64	44.79	17.11	20.49	18.06	37.9633333333333	18.5533333333333	-1.03292826439853	1.88206625924042e-13	5.80377569785766e-11	Pim1	proviral integration site 1 [Source:MGI Symbol;Acc:MGI:97584]	Human Diseases;Environmental Information Processing;Human Diseases;Human Diseases;Human Diseases	Cancers;Signal transduction;Cancers;Endocrine and metabolic diseases;Cancers	ko05200//Pathways in cancer;ko04630//Jak-STAT signaling pathway;ko05206//MicroRNAs in cancer;ko04933//AGE-RAGE signaling pathway in diabetic complications;ko05221//Acute myeloid leukemia	K04702;K04702;K04702;K04702;K04702	GO:0005634//nucleus;GO:0005730//nucleolus;GO:0005737//cytoplasm;GO:0005829//cytosol;GO:0005886//plasma membrane;GO:0016020//membrane	GO:0000166//nucleotide binding;GO:0004672//protein kinase activity;GO:0004674//protein serine/threonine kinase activity;GO:0005515//protein binding;GO:0005524//ATP binding;GO:0008134//transcription factor binding;GO:0016301//kinase activity;GO:0016740//transferase activity;GO:0030145//manganese ion binding;GO:0043024//ribosomal small subunit binding;GO:0043539//protein serine/threonine kinase act…	GO:0006468//protein phosphorylation;GO:0006915//apoptotic process;GO:0007049//cell cycle;GO:0016310//phosphorylation;GO:0022898//regulation of transmembrane transporter activity;GO:0030212//hyaluronan metabolic process;GO:0043066//negative regulation of apoptotic process;GO:0043433//negative regulation of sequence-specific DNA binding transcription factor activity;GO:0045737//positive regulation …
ENSMUSG00000017400	411	505	350	122	153	132	5.43	7.75	5.10	1.99	2.34	1.83	6.09333333333333	2.05333333333333	-1.56926381436317	2.36668005403396e-13	7.15784177111385e-11	Stac2	SH3 and cysteine rich domain 2 [Source:MGI Symbol;Acc:MGI:2144518]	-	-	-	-	GO:0005737//cytoplasm;GO:0005829//cytosol;GO:0005886//plasma membrane;GO:0016020//membrane;GO:0031234//extrinsic component of cytoplasmic side of plasma membrane;GO:0042383//sarcolemma	GO:0003674//molecular_function;GO:0005515//protein binding;GO:0046872//metal ion binding	GO:0003009//skeletal muscle contraction;GO:0035556//intracellular signal transduction;GO:1901387//positive regulation of voltage-gated calcium channel activity;GO:1903078//positive regulation of protein localization to plasma membrane
ENSMUSG00000052271	328	383	252	53	102	74	3.78	5.13	3.21	0.75	1.36	0.90	4.04	1.00333333333333	-2.00955430671325	6.12413307751544e-13	1.81113124878933e-10	Bhlha15	basic helix-loop-helix family, member a15 [Source:MGI Symbol;Acc:MGI:891976]	Human Diseases	Endocrine and metabolic diseases	ko04950//Maturity onset diabetes of the young	K08040	GO:0005634//nucleus	GO:0000977//RNA polymerase II regulatory region sequence-specific DNA binding;GO:0001228//transcriptional activator activity, RNA polymerase II transcription regulatory region sequence-specific binding;GO:0003677//DNA binding;GO:0042802//identical protein binding;GO:0046983//protein dimerization activity	GO:0006355//regulation of transcription, DNA-templated;GO:0006851//mitochondrial calcium ion transport;GO:0007030//Golgi organization;GO:0007186//G-protein coupled receptor signaling pathway;GO:0007267//cell-cell signaling;GO:0010832//negative regulation of myotube differentiation;GO:0019722//calcium-mediated signaling;GO:0030968//endoplasmic reticulum unfolded protein response;GO:0042149//cellul…
ENSMUSG00000054404	2616	3588	3750	1292	1174	1530	17.61	29.72	30.98	12.82	10.14	11.91	26.1033333333333	11.6233333333333	-1.16721018387713	6.21867409134761e-13	1.81113124878933e-10	Slfn5	schlafen 5 [Source:MGI Symbol;Acc:MGI:1329004]	-	-	-	-	GO:0005634//nucleus	GO:0000166//nucleotide binding;GO:0005524//ATP binding	GO:0030154//cell differentiation
ENSMUSG00000057596	73	210	190	3	15	9	1.23	4.43	3.50	0.06	0.34	0.25	3.05333333333333	0.216666666666667	-3.81683597506849	6.68379240532591e-13	1.91120005742837e-10	Trim30d	tripartite motif-containing 30D [Source:MGI Symbol;Acc:MGI:3035181]	Human Diseases	Infectious disease: viral	ko05170//Human immunodeficiency virus 1 infection	K10648	GO:0005575//cellular_component	GO:0003674//molecular_function;GO:0004842//ubiquitin-protein transferase activity;GO:0005515//protein binding;GO:0008270//zinc ion binding;GO:0046872//metal ion binding	GO:0006914//autophagy;GO:0008150//biological_process;GO:0016567//protein ubiquitination;GO:0045087//innate immune response;GO:0051607//defense response to virus
ENSMUSG00000034687	546	450	490	987	890	1445	1.39	1.33	1.37	3.21	2.62	3.86	1.36333333333333	3.23	1.24439582247334	1.19628425748823e-12	3.30069517851181e-10	Fras1	Fraser extracellular matrix complex subunit 1 [Source:MGI Symbol;Acc:MGI:2385368]	Environmental Information Processing	Signaling molecules and interaction	ko04512//ECM-receptor interaction	K23379	GO:0005604//basement membrane;GO:0005886//plasma membrane;GO:0016020//membrane;GO:0016021//integral component of membrane	GO:0005201//extracellular matrix structural constituent;GO:0005515//protein binding;GO:0046872//metal ion binding	GO:0002009//morphogenesis of an epithelium;GO:0003338//metanephros morphogenesis;GO:0007154//cell communication;GO:0015031//protein transport;GO:0030326//embryonic limb morphogenesis;GO:0043588//skin development;GO:0060021//palate development
ENSMUSG00000051998	251	151	230	18	36	56	6.17	3.06	4.43	1.02	0.73	1.60	4.55333333333333	1.11666666666667	-2.02772448294495	1.80063898011012e-12	4.79977105765964e-10	Lax1	lymphocyte transmembrane adaptor 1 [Source:MGI Symbol;Acc:MGI:2443362]	-	-	-	-	GO:0005794//Golgi apparatus;GO:0005829//cytosol;GO:0005886//plasma membrane;GO:0016020//membrane;GO:0016021//integral component of membrane	GO:0019901//protein kinase binding;GO:0042169//SH2 domain binding	GO:0000188//inactivation of MAPK activity;GO:0002250//adaptive immune response;GO:0002376//immune system process;GO:0006955//immune response;GO:0035556//intracellular signal transduction;GO:0042113//B cell activation;GO:0046649//lymphocyte activation;GO:0048305//immunoglobulin secretion;GO:0050851//antigen receptor-mediated signaling pathway;GO:0050868//negative regulation of T cell activation;GO…
ENSMUSG00000041827	358	814	747	116	148	93	6.61	17.46	15.61	2.64	3.17	1.87	13.2266666666667	2.56	-2.36923380966572	1.90359268409784e-12	4.9896336904678e-10	Oasl1	2'-5' oligoadenylate synthetase-like 1 [Source:MGI Symbol;Acc:MGI:2180849]	Human Diseases	Infectious diseases	ko05165//Human papillomavirus infection	K14608	GO:0005634//nucleus;GO:0005654//nucleoplasm;GO:0005730//nucleolus;GO:0005737//cytoplasm;GO:0005829//cytosol;GO:0016020//membrane	GO:0003677//DNA binding;GO:0003723//RNA binding;GO:0003725//double-stranded RNA binding;GO:0005515//protein binding;GO:0005524//ATP binding;GO:0016740//transferase activity	GO:0002376//immune system process;GO:0006955//immune response;GO:0009615//response to virus;GO:0045071//negative regulation of viral genome replication;GO:0045087//innate immune response;GO:0051607//defense response to virus;GO:0060700//regulation of ribonuclease activity
ENSMUSG00000062778	6893	12078	7942	2963	3113	2925	166.15	340.10	213.20	89.84	87.94	75.11	239.816666666667	84.2966666666667	-1.50838443689745	2.25594061073579e-12	5.81625868607243e-10	Chia1	chitinase, acidic 1 [Source:MGI Symbol;Acc:MGI:1932052]	Metabolism;Metabolism	Global and overview maps;Carbohydrate metabolism	ko01100//Metabolic pathways;ko00520//Amino sugar and nucleotide sugar metabolism	K01183;K01183	GO:0005576//extracellular region;GO:0005615//extracellular space;GO:0005737//cytoplasm	GO:0004553//hydrolase activity, hydrolyzing O-glycosyl compounds;GO:0004568//chitinase activity;GO:0008061//chitin binding;GO:0016787//hydrolase activity;GO:0016798//hydrolase activity, acting on glycosyl bonds;GO:0019900//kinase binding	GO:0000272//polysaccharide catabolic process;GO:0001878//response to yeast;GO:0002376//immune system process;GO:0002532//production of molecular mediator involved in inflammatory response;GO:0005975//carbohydrate metabolic process;GO:0006030//chitin metabolic process;GO:0006032//chitin catabolic process;GO:0006915//apoptotic process;GO:0006954//inflammatory response;GO:0006955//immune response;GO…
ENSMUSG00000058163	553	1379	1183	191	221	269	7.34	21.28	17.37	3.12	3.39	3.75	15.33	3.42	-2.16428946677288	4.31502608425038e-12	1.07718119407946e-09	Gm5431	predicted gene 5431 [Source:MGI Symbol;Acc:MGI:3645205]	Environmental Information Processing	Signal transduction	ko04668//TNF signaling pathway	K17072	GO:0005789//endoplasmic reticulum membrane;GO:0016020//membrane	GO:0003924//GTPase activity;GO:0005525//GTP binding	GO:0006952//defense response;GO:0035458//cellular response to interferon-beta
ENSMUSG00000019122	2814	3765	2356	658	591	1256	77.17	117.00	79.40	22.09	18.55	32.64	91.19	24.4266666666667	-1.90041862275726	4.43723204130859e-12	1.09038044240094e-09	Ccl9	chemokine (C-C motif) ligand 9 [Source:MGI Symbol;Acc:MGI:104533]	Environmental Information Processing;Organismal Systems;Environmental Information Processing	Signaling molecules and interaction;Immune system;Signaling molecules and interaction	ko04060//Cytokine-cytokine receptor interaction;ko04062//Chemokine signaling pathway;ko04061//Viral protein interaction with cytokine and cytokine receptor	K22671;K22671;K22671	GO:0005576//extracellular region;GO:0005615//extracellular space	GO:0005125//cytokine activity;GO:0008009//chemokine activity;GO:0048020//CCR chemokine receptor binding	GO:0002548//monocyte chemotaxis;GO:0006935//chemotaxis;GO:0006954//inflammatory response;GO:0006955//immune response;GO:0007165//signal transduction;GO:0007186//G-protein coupled receptor signaling pathway;GO:0030593//neutrophil chemotaxis;GO:0043547//positive regulation of GTPase activity;GO:0045662//negative regulation of myoblast differentiation;GO:0048245//eosinophil chemotaxis;GO:0048247//ly…
ENSMUSG00000001542	677	871	674	307	271	269	12.47	17.06	9.71	3.79	6.12	4.84	13.08	4.91666666666667	-1.41161008708267	4.66152896752519e-12	1.12787486265029e-09	Ell2	elongation factor RNA polymerase II 2 [Source:MGI Symbol;Acc:MGI:2183438]	-	-	-	-	GO:0005634//nucleus;GO:0005654//nucleoplasm;GO:0008023//transcription elongation factor complex	-	GO:0006368//transcription elongation from RNA polymerase II promoter;GO:0032968//positive regulation of transcription elongation from RNA polymerase II promoter;GO:0042795//snRNA transcription from RNA polymerase II promoter
ENSMUSG00000033213	87	155	74	10	7	13	4.50	9.50	4.33	0.66	0.44	0.70	6.11	0.6	-3.34813797421021	5.21385205063969e-12	1.22385449552851e-09	AA467197	expressed sequence AA467197 [Source:MGI Symbol;Acc:MGI:3034182]	-	-	-	-	GO:0005634//nucleus;GO:0005739//mitochondrion;GO:0005751//mitochondrial respiratory chain complex IV;GO:0016020//membrane;GO:0016021//integral component of membrane	GO:0004129//cytochrome-c oxidase activity	GO:0009617//response to bacterium;GO:0022900//electron transport chain;GO:1902600//hydrogen ion transmembrane transport
ENSMUSG00000028327	171	315	111	20	20	32	1.88	4.37	1.42	0.26	0.26	0.38	2.55666666666667	0.3	-3.09122967117326	7.02420051523578e-12	1.60100871743642e-09	Stra6l	STRA6-like [Source:MGI Symbol;Acc:MGI:1921402]	-	-	-	-	GO:0005886//plasma membrane;GO:0016020//membrane;GO:0016021//integral component of membrane	GO:0005515//protein binding	GO:0034633//retinol transport;GO:0071939//vitamin A import
ENSMUSG00000110622	37	242	96	2	3	2	0.33	2.47	0.93	0.02	0.03	0.02	1.24333333333333	0.0233333333333333	-5.73567689819763	7.45643563466296e-12	1.65165300318795e-09	Iqcn	IQ motif containing N [Source:MGI Symbol;Acc:MGI:3708784]	-	-	-	-	-	GO:0003674//molecular_function;GO:0005515//protein binding	GO:0008150//biological_process
ENSMUSG00000043110	257	168	287	641	625	1276	2.79	2.11	3.44	8.57	7.85	14.55	2.78	10.3233333333333	1.89275209422999	9.32960230696035e-12	1.98279264164278e-09	Lrrn4	leucine rich repeat neuronal 4 [Source:MGI Symbol;Acc:MGI:2445154]	-	-	-	-	GO:0005887//integral component of plasma membrane;GO:0016020//membrane;GO:0016021//integral component of membrane	GO:0003674//molecular_function;GO:0005515//protein binding	GO:0007616//long-term memory;GO:0008542//visual learning
ENSMUSG00000049723	12207	28086	8717	532	979	1130	348.07	937.30	275.89	18.31	32.93	33.78	520.42	28.34	-4.19876474324205	9.56789997135037e-12	2.00632483799236e-09	Mmp12	matrix metallopeptidase 12 [Source:MGI Symbol;Acc:MGI:97005]	-	-	-	-	GO:0005576//extracellular region;GO:0005615//extracellular space;GO:0005634//nucleus;GO:0005737//cytoplasm;GO:0031012//extracellular matrix	GO:0001047//core promoter binding;GO:0004222//metalloendopeptidase activity;GO:0005509//calcium ion binding;GO:0005518//collagen binding;GO:0008233//peptidase activity;GO:0008237//metallopeptidase activity;GO:0008270//zinc ion binding;GO:0016787//hydrolase activity;GO:0043565//sequence-specific DNA binding;GO:0046872//metal ion binding	GO:0000122//negative regulation of transcription from RNA polymerase II promoter;GO:0006508//proteolysis;GO:0006606//protein import into nucleus;GO:0010628//positive regulation of gene expression;GO:0030198//extracellular matrix organization;GO:0030574//collagen catabolic process;GO:0035313//wound healing, spreading of epidermal cells;GO:0042060//wound healing;GO:0045944//positive regulation of t…
ENSMUSG00000079363	2580	2394	3397	985	1057	1542	27.19	37.61	47.09	16.36	17.40	19.56	37.2966666666667	17.7733333333333	-1.06933241784286	1.09382689540532e-11	2.26350205053151e-09	Gbp4	guanylate binding protein 4 [Source:MGI Symbol;Acc:MGI:97072]	-	-	-	-	GO:0016020//membrane;GO:0020005//symbiont-containing vacuole membrane;GO:0031410//cytoplasmic vesicle	GO:0000166//nucleotide binding;GO:0003924//GTPase activity;GO:0005515//protein binding;GO:0005525//GTP binding	GO:0000122//negative regulation of transcription from RNA polymerase II promoter;GO:0001933//negative regulation of protein phosphorylation;GO:0031397//negative regulation of protein ubiquitination;GO:0032687//negative regulation of interferon-alpha production;GO:0042308//negative regulation of protein import into nucleus;GO:0042832//defense response to protozoan;GO:0050688//regulation of defense…
ENSMUSG00000026536	104	154	166	18	29	33	2.35	4.03	4.13	0.51	0.76	0.77	3.50333333333333	0.68	-2.36512161199068	1.11381022454490e-11	2.27492122096334e-09	Ifi211	interferon activated gene 211 [Source:MGI Symbol;Acc:MGI:3041120]	Organismal Systems	Immune system	ko04621//NOD-like receptor signaling pathway	K20914	GO:0005634//nucleus;GO:0005654//nucleoplasm;GO:0005730//nucleolus;GO:0005829//cytosol;GO:0016607//nuclear speck;GO:0034399//nuclear periphery	GO:0000978//RNA polymerase II core promoter proximal region sequence-specific DNA binding;GO:0001227//transcriptional repressor activity, RNA polymerase II transcription regulatory region sequence-specific binding;GO:0003690//double-stranded DNA binding;GO:0008134//transcription factor binding;GO:0042802//identical protein binding	GO:0000122//negative regulation of transcription from RNA polymerase II promoter;GO:0002218//activation of innate immune response;GO:0009617//response to bacterium;GO:0032731//positive regulation of interleukin-1 beta production;GO:0035458//cellular response to interferon-beta
ENSMUSG00000052477	336	452	440	130	134	179	15.74	26.30	24.26	7.21	8.07	9.20	22.1	8.16	-1.4374053123073	1.15134261531544e-11	2.32143145013666e-09	C130026I21Rik	RIKEN cDNA C130026I21 gene [Source:MGI Symbol;Acc:MGI:3612702]	-	-	-	-	GO:0005575//cellular_component;GO:0005634//nucleus;GO:0016604//nuclear body	-	-
ENSMUSG00000031444	611	742	480	175	205	268	12.69	18.10	11.39	4.51	5.26	6.05	14.06	5.27333333333333	-1.4148094953209	1.32426582996196e-11	2.60334108847646e-09	F10	coagulation factor X [Source:MGI Symbol;Acc:MGI:103107]	Organismal Systems	Immune system	ko04610//Complement and coagulation cascades	K01314	GO:0005576//extracellular region;GO:0005615//extracellular space;GO:0005783//endoplasmic reticulum;GO:0016020//membrane;GO:0043231//intracellular membrane-bounded organelle	GO:0004252//serine-type endopeptidase activity;GO:0005509//calcium ion binding;GO:0005543//phospholipid binding;GO:0008233//peptidase activity;GO:0008236//serine-type peptidase activity;GO:0016787//hydrolase activity	GO:0006508//proteolysis;GO:0007596//blood coagulation;GO:0007599//hemostasis;GO:0051897//positive regulation of protein kinase B signaling
ENSMUSG00000040253	2683	4000	4137	1344	1515	1491	30.44	53.60	51.83	18.47	20.30	16.93	45.29	18.5666666666667	-1.28647771254387	1.55944338870506e-11	3.02782298446475e-09	Gbp7	guanylate binding protein 7 [Source:MGI Symbol;Acc:MGI:2444421]	Organismal Systems	Immune system	ko04621//NOD-like receptor signaling pathway	K20899	GO:0020005//symbiont-containing vacuole membrane;GO:0031410//cytoplasmic vesicle	GO:0000166//nucleotide binding;GO:0003924//GTPase activity;GO:0005525//GTP binding	GO:0042832//defense response to protozoan;GO:0044406//adhesion of symbiont to host;GO:0050830//defense response to Gram-positive bacterium;GO:0071346//cellular response to interferon-gamma
ENSMUSG00000069515	10213	6029	10024	16365	18370	20640	325.59	223.35	352.92	643.64	679.05	692.38	300.62	671.69	1.15985455673185	1.71148653216517e-11	3.28250593797093e-09	Lyz1	lysozyme 1 [Source:MGI Symbol;Acc:MGI:96902]	Organismal Systems	Digestive system	ko04970//Salivary secretion	K13915	GO:0000137//Golgi cis cisterna;GO:0005576//extracellular region;GO:0005615//extracellular space;GO:0005737//cytoplasm;GO:0005788//endoplasmic reticulum lumen;GO:0005795//Golgi stack;GO:0005902//microvillus;GO:0030140//trans-Golgi network transport vesicle;GO:0030141//secretory granule;GO:0048237//rough endoplasmic reticulum lumen	GO:0003796//lysozyme activity;GO:0003824//catalytic activity;GO:0016787//hydrolase activity;GO:0016798//hydrolase activity, acting on glycosyl bonds;GO:0042802//identical protein binding	GO:0008152//metabolic process;GO:0019835//cytolysis;GO:0042742//defense response to bacterium;GO:0050829//defense response to Gram-negative bacterium;GO:0050830//defense response to Gram-positive bacterium
ENSMUSG00000030921	1121	2637	2189	479	521	589	11.97	32.72	25.81	6.31	6.45	6.62	23.5	6.46	-1.86305468675844	3.25205147483014e-11	6.08869208864923e-09	Trim30a	tripartite motif-containing 30A [Source:MGI Symbol;Acc:MGI:98178]	Human Diseases	Infectious disease: viral	ko05170//Human immunodeficiency virus 1 infection	K10648	GO:0005634//nucleus;GO:0005737//cytoplasm	GO:0003677//DNA binding;GO:0004842//ubiquitin-protein transferase activity;GO:0005515//protein binding;GO:0008270//zinc ion binding;GO:0046872//metal ion binding	GO:0006914//autophagy;GO:0009617//response to bacterium;GO:0032715//negative regulation of interleukin-6 production;GO:0032720//negative regulation of tumor necrosis factor production;GO:0034122//negative regulation of toll-like receptor signaling pathway;GO:0045087//innate immune response;GO:0045732//positive regulation of protein catabolic process;GO:0046598//positive regulation of viral entry …
ENSMUSG00000020641	462	974	817	182	215	207	4.91	12.04	9.61	2.39	2.64	2.32	8.85333333333333	2.45	-1.8534389916232	3.30266552280659e-11	6.11070831496226e-09	Rsad2	radical S-adenosyl methionine domain containing 2 [Source:MGI Symbol;Acc:MGI:1929628]	Human Diseases;Human Diseases	Infectious diseases;Infectious diseases	ko05164//Influenza A;ko05160//Hepatitis C	K15045;K15045	GO:0001650//fibrillar center;GO:0005739//mitochondrion;GO:0005741//mitochondrial outer membrane;GO:0005743//mitochondrial inner membrane;GO:0005783//endoplasmic reticulum;GO:0005789//endoplasmic reticulum membrane;GO:0005811//lipid particle;GO:0016020//membrane	GO:0003674//molecular_function;GO:0003824//catalytic activity;GO:0005515//protein binding;GO:0043621//protein self-association;GO:0046872//metal ion binding;GO:0051536//iron-sulfur cluster binding;GO:0051539//4 iron, 4 sulfur cluster binding	GO:0001503//ossification;GO:0002376//immune system process;GO:0009615//response to virus;GO:0030278//regulation of ossification;GO:0034157//positive regulation of toll-like receptor 7 signaling pathway;GO:0034165//positive regulation of toll-like receptor 9 signaling pathway;GO:0035710//CD4-positive, alpha-beta T cell activation;GO:0043367//CD4-positive, alpha-beta T cell differentiation;GO:00450…
ENSMUSG00000026656	2301	2055	1958	638	890	1231	56.53	57.28	52.86	19.36	26.65	32.61	55.5566666666667	26.2066666666667	-1.08402617890384	3.99997324861333e-11	7.14858855465249e-09	Fcgr2b	Fc receptor, IgG, low affinity IIb [Source:MGI Symbol;Acc:MGI:95499]	Cellular Processes;Human Diseases;Human Diseases;Organismal Systems;Organismal Systems;Human Diseases;Organismal Systems	Transport and catabolism;Infectious diseases;Infectious diseases;Immune system;Immune system;Infectious diseases;Development	ko04145//Phagosome;ko05152//Tuberculosis;ko05150//Staphylococcus aureus infection;ko04666//Fc gamma R-mediated phagocytosis;ko04662//B cell receptor signaling pathway;ko05162//Measles;ko04380//Osteoclast differentiation	K12560;K12560;K12560;K12560;K12560;K12560;K12560	GO:0016020//membrane;GO:0016021//integral component of membrane	-	-
ENSMUSG00000044156	221	233	252	84	99	99	5.17	6.06	5.99	1.97	2.66	2.44	5.74	2.35666666666667	-1.28430302258744	5.40028023654747e-11	9.3570333805237e-09	Hepacam2	HEPACAM family member 2 [Source:MGI Symbol;Acc:MGI:2141520]	-	-	-	-	GO:0000139//Golgi membrane;GO:0005654//nucleoplasm;GO:0005737//cytoplasm;GO:0005794//Golgi apparatus;GO:0005813//centrosome;GO:0005815//microtubule organizing center;GO:0005819//spindle;GO:0005856//cytoskeleton;GO:0016020//membrane;GO:0016021//integral component of membrane;GO:0030496//midbody;GO:0043231//intracellular membrane-bounded organelle;GO:0072686//mitotic spindle	GO:0003674//molecular_function	GO:0007049//cell cycle;GO:0007098//centrosome cycle;GO:0051301//cell division
ENSMUSG00000028053	132	44	47	0	0	0	0.46	0.18	0.18	0.00	0.00	0.00	0.273333333333333	0.001	-8.09451759878429	5.78495756725263e-11	9.77804500912323e-09	Ash1l	ASH1 like histone lysine methyltransferase [Source:MGI Symbol;Acc:MGI:2183158]	Metabolism;Metabolism	Global and overview maps;Amino acid metabolism	ko01100//Metabolic pathways;ko00310//Lysine degradation	K06101;K06101	GO:0005634//nucleus;GO:0005654//nucleoplasm;GO:0005694//chromosome;GO:0005794//Golgi apparatus;GO:0005923//bicellular tight junction;GO:0030054//cell junction	GO:0003677//DNA binding;GO:0003682//chromatin binding;GO:0005515//protein binding;GO:0008168//methyltransferase activity;GO:0016740//transferase activity;GO:0018024//histone-lysine N-methyltransferase activity;GO:0042800//histone methyltransferase activity (H3-K4 specific);GO:0046872//metal ion binding;GO:0046974//histone methyltransferase activity (H3-K9 specific);GO:0046975//histone methyltrans…	GO:0001501//skeletal system development;GO:0002674//negative regulation of acute inflammatory response;GO:0006325//chromatin organization;GO:0007338//single fertilization;GO:0009791//post-embryonic development;GO:0010468//regulation of gene expression;GO:0030317//sperm motility;GO:0032259//methylation;GO:0032635//interleukin-6 production;GO:0043124//negative regulation of I-kappaB kinase/NF-kappa…
ENSMUSG00000027514	512	1282	1252	118	234	245	13.81	40.19	38.88	4.34	7.58	7.76	30.96	6.56	-2.23863775152633	5.84432015551334e-11	9.77804500912323e-09	Zbp1	Z-DNA binding protein 1 [Source:MGI Symbol;Acc:MGI:1927449]	Cellular Processes;Organismal Systems	Cell growth and death;Immune system	ko04217//Necroptosis;ko04623//Cytosolic DNA-sensing pathway	K12965;K12965	GO:0005634//nucleus;GO:0005737//cytoplasm;GO:0005829//cytosol	GO:0003677//DNA binding;GO:0003692//left-handed Z-DNA binding;GO:0005515//protein binding;GO:0042802//identical protein binding	GO:0002376//immune system process;GO:0016032//viral process;GO:0045087//innate immune response;GO:0051607//defense response to virus;GO:0060340//positive regulation of type I interferon-mediated signaling pathway
ENSMUSG00000000204	324	434	528	95	160	114	3.57	5.39	6.27	1.30	2.04	1.46	5.07666666666667	1.6	-1.66580963087877	6.43694137377306e-11	1.05451851026384e-08	Slfn4	schlafen 4 [Source:MGI Symbol;Acc:MGI:1329010]	-	-	-	-	GO:0005575//cellular_component	GO:0003674//molecular_function	GO:0009617//response to bacterium
ENSMUSG00000034459	57	50	50	0	0	0	0.86	0.88	0.83	0.00	0.00	0.00	0.856666666666667	0.001	-9.74259014336008	1.08443535191811e-10	1.75823863707382e-08	Ifit1	interferon-induced protein with tetratricopeptide repeats 1 [Source:MGI Symbol;Acc:MGI:99450]	Human Diseases	Infectious diseases	ko05160//Hepatitis C	K14217	GO:0005737//cytoplasm;GO:0005829//cytosol	GO:0003723//RNA binding;GO:0005515//protein binding	GO:0002376//immune system process;GO:0009615//response to virus;GO:0009617//response to bacterium;GO:0035457//cellular response to interferon-alpha;GO:0035458//cellular response to interferon-beta;GO:0045087//innate immune response;GO:0051607//defense response to virus
ENSMUSG00000079355	108	92	155	269	332	354	2.37	2.34	3.77	7.37	8.45	8.27	2.82666666666667	8.03	1.50629822367527	1.18538935350632e-10	1.90230799618306e-08	Ackr4	atypical chemokine receptor 4 [Source:MGI Symbol;Acc:MGI:2181676]	Environmental Information Processing;Environmental Information Processing	Signaling molecules and interaction;Signaling molecules and interaction	ko04060//Cytokine-cytokine receptor interaction;ko04061//Viral protein interaction with cytokine and cytokine receptor	K04186;K04186	GO:0005623//cell;GO:0005768//endosome;GO:0005769//early endosome;GO:0005886//plasma membrane;GO:0009897//external side of plasma membrane;GO:0016020//membrane;GO:0016021//integral component of membrane;GO:0055037//recycling endosome	GO:0004930//G-protein coupled receptor activity;GO:0004950//chemokine receptor activity;GO:0005044//scavenger receptor activity;GO:0016493//C-C chemokine receptor activity;GO:0019956//chemokine binding;GO:0019957//C-C chemokine binding	GO:0006897//endocytosis;GO:0006935//chemotaxis;GO:0006955//immune response;GO:0007165//signal transduction;GO:0007186//G-protein coupled receptor signaling pathway;GO:0007204//positive regulation of cytosolic calcium ion concentration;GO:0019722//calcium-mediated signaling;GO:0060326//cell chemotaxis;GO:0070098//chemokine-mediated signaling pathway
ENSMUSG00000076583	246	265	453	40	30	93	27.14	33.97	55.18	5.44	3.84	10.80	38.7633333333333	6.69333333333333	-2.53389586763172	1.21887370123195e-10	1.93628552517928e-08	Igkv8-24	immunoglobulin kappa chain variable 8-24 [Source:MGI Symbol;Acc:MGI:4947958]	-	-	-	-	GO:0005615//extracellular space	-	GO:0002377//immunoglobulin production;GO:0006955//immune response
ENSMUSG00000027737	247	426	213	52	71	80	2.39	4.94	2.34	0.61	0.81	0.53	3.22333333333333	0.65	-2.31004176572723	1.31166820856414e-10	2.06286059160882e-08	Slc7a11	solute carrier family 7 (cationic amino acid transporter, y+ system), member 11 [Source:MGI Symbol;Acc:MGI:1347355]	Cellular Processes	Cell growth and death	ko04216//Ferroptosis	K13869	GO:0005791//rough endoplasmic reticulum;GO:0005856//cytoskeleton;GO:0005886//plasma membrane;GO:0009986//cell surface;GO:0016020//membrane;GO:0016021//integral component of membrane;GO:0031526//brush border membrane;GO:0043231//intracellular membrane-bounded organelle;GO:0045177//apical part of cell;GO:0097449//astrocyte projection	GO:0015179//L-amino acid transmembrane transporter activity;GO:0022857//transmembrane transporter activity	GO:0006749//glutathione metabolic process;GO:0006865//amino acid transport;GO:0006979//response to oxidative stress;GO:0007420//brain development;GO:0008542//visual learning;GO:0009636//response to toxic substance;GO:0014070//response to organic cyclic compound;GO:0021591//ventricular system development;GO:0021756//striatum development;GO:0030534//adult behavior;GO:0033029//regulation of neutroph…
ENSMUSG00000028773	183	110	134	283	375	367	8.95	6.25	7.24	17.08	21.27	18.89	7.48	19.08	1.35095099611787	1.7330913174694e-10	2.69294783232338e-08	Fabp3	fatty acid binding protein 3, muscle and heart [Source:MGI Symbol;Acc:MGI:95476]	Organismal Systems	Endocrine system	ko03320//PPAR signaling pathway	K08752	GO:0005615//extracellular space;GO:0005737//cytoplasm;GO:0005829//cytosol;GO:0016528//sarcoplasm	GO:0005324//long-chain fatty acid transporter activity;GO:0005504//fatty acid binding;GO:0008092//cytoskeletal protein binding;GO:0008289//lipid binding;GO:0036041//long-chain fatty acid binding;GO:0050543//icosatetraenoic acid binding;GO:0070538//oleic acid binding	GO:0006631//fatty acid metabolic process;GO:0015909//long-chain fatty acid transport;GO:0032365//intracellular lipid transport;GO:0032868//response to insulin;GO:0042493//response to drug;GO:0042632//cholesterol homeostasis;GO:0046320//regulation of fatty acid oxidation;GO:0050873//brown fat cell differentiation;GO:0055091//phospholipid homeostasis;GO:0070542//response to fatty acid;GO:0071073//p…
ENSMUSG00000095794	1544	1471	1865	205	392	684	164.94	182.52	219.98	27.01	48.55	76.87	189.146666666667	50.81	-1.89632098273594	1.74655483497797e-10	2.69294783232338e-08	Igkv6-17	immunoglobulin kappa variable 6-17 [Source:MGI Symbol;Acc:MGI:1330833]	-	-	-	-	-	-	-
ENSMUSG00000033880	5314	9313	8881	2584	3018	3279	139.23	257.90	251.87	81.89	85.29	86.53	216.333333333333	84.57	-1.35503809376113	1.82082257378392e-10	2.75346890556728e-08	Lgals3bp	lectin, galactoside-binding, soluble, 3 binding protein [Source:MGI Symbol;Acc:MGI:99554]	-	-	-	-	GO:0005576//extracellular region;GO:0005615//extracellular space;GO:0016020//membrane	GO:0005044//scavenger receptor activity;GO:0005515//protein binding	GO:0006897//endocytosis;GO:0007155//cell adhesion
ENSMUSG00000043017	324	285	263	115	141	138	4.07	4.20	3.60	1.88	2.08	1.83	3.95666666666667	1.93	-1.03568468165267	2.14214247047179e-10	3.20852139362951e-08	Ptgir	prostaglandin I receptor (IP) [Source:MGI Symbol;Acc:MGI:99535]	Environmental Information Processing;Organismal Systems;Organismal Systems	Signaling molecules and interaction;Circulatory system;Immune system	ko04080//Neuroactive ligand-receptor interaction;ko04270//Vascular smooth muscle contraction;ko04611//Platelet activation	K04263;K04263;K04263	GO:0005623//cell;GO:0005829//cytosol;GO:0005886//plasma membrane;GO:0016020//membrane;GO:0016021//integral component of membrane	GO:0004930//G-protein coupled receptor activity;GO:0016501//prostacyclin receptor activity	GO:0006954//inflammatory response;GO:0007165//signal transduction;GO:0007186//G-protein coupled receptor signaling pathway;GO:0007189//adenylate cyclase-activating G-protein coupled receptor signaling pathway;GO:0007204//positive regulation of cytosolic calcium ion concentration;GO:0010642//negative regulation of platelet-derived growth factor receptor signaling pathway;GO:0032496//response to li…
ENSMUSG00000030149	288	298	332	124	117	157	7.18	8.69	9.08	3.44	3.18	4.16	8.31666666666667	3.59333333333333	-1.21068263747212	2.19827685674383e-10	3.26153774773682e-08	Klrk1	killer cell lectin-like receptor subfamily K, member 1 [Source:MGI Symbol;Acc:MGI:1196250]	Organismal Systems;Human Diseases	Immune system;Infectious diseases	ko04650//Natural killer cell mediated cytotoxicity;ko05144//Malaria	K06728;K06728	GO:0005886//plasma membrane;GO:0009897//external side of plasma membrane;GO:0009986//cell surface;GO:0016020//membrane;GO:0016021//integral component of membrane	GO:0005515//protein binding;GO:0030246//carbohydrate binding;GO:0032394//MHC class Ib receptor activity;GO:0038023//signaling receptor activity;GO:0042288//MHC class I protein binding	GO:0002223//stimulatory C-type lectin receptor signaling pathway;GO:0002250//adaptive immune response;GO:0002376//immune system process;GO:0002860//positive regulation of natural killer cell mediated cytotoxicity directed against tumor cell target;GO:0030101//natural killer cell activation;GO:0030154//cell differentiation;GO:0030887//positive regulation of myeloid dendritic cell activation;GO:003…
ENSMUSG00000095737	424	198	58	15	6	20	48.36	26.25	7.31	2.11	0.79	2.40	27.3066666666667	1.76666666666667	-3.95015145054944	2.36511289858604e-10	3.47627388374417e-08	Igkv11-125	immunoglobulin kappa variable 11-125 [Source:MGI Symbol;Acc:MGI:3642338]	-	-	-	-	-	-	-
ENSMUSG00000072620	1603	2359	2124	820	860	1020	38.78	66.33	56.76	24.48	24.13	25.97	53.9566666666667	24.86	-1.11797492787779	2.47093144749371e-10	3.5981795254383e-08	Slfn2	schlafen 2 [Source:MGI Symbol;Acc:MGI:1313258]	-	-	-	-	-	-	GO:0008285//negative regulation of cell proliferation;GO:0009617//response to bacterium
ENSMUSG00000023992	919	1282	583	123	170	324	41.19	67.32	30.50	6.87	9.15	15.91	46.3366666666667	10.6433333333333	-2.12220421220497	2.58213706307865e-10	3.72562106339798e-08	Trem2	triggering receptor expressed on myeloid cells 2 [Source:MGI Symbol;Acc:MGI:1913150]	Organismal Systems	Development	ko04380//Osteoclast differentiation	K14378	GO:0005576//extracellular region;GO:0005886//plasma membrane;GO:0005887//integral component of plasma membrane;GO:0016020//membrane;GO:0016021//integral component of membrane;GO:0031226//intrinsic component of plasma membrane	GO:0001530//lipopolysaccharide binding;GO:0001540//beta-amyloid binding;GO:0004888//transmembrane signaling receptor activity;GO:0005515//protein binding;GO:0005543//phospholipid binding;GO:0008035//high-density lipoprotein particle binding;GO:0008289//lipid binding;GO:0030169//low-density lipoprotein particle binding;GO:0034185//apolipoprotein binding;GO:0034186//apolipoprotein A-I binding;GO:00…	GO:0001774//microglial cell activation;GO:0001934//positive regulation of protein phosphorylation;GO:0002282//microglial cell activation involved in immune response;GO:0002588//positive regulation of antigen processing and presentation of peptide antigen via MHC class II;GO:0002931//response to ischemia;GO:0006911//phagocytosis, engulfment;GO:0010468//regulation of gene expression;GO:0010507//neg…
ENSMUSG00000118607	132	171	178	22	41	51	1.90	2.85	2.82	0.39	0.68	0.77	2.52333333333333	0.613333333333333	-2.04058753392872	2.96162090761126e-10	4.23431018309112e-08	AC147806.2	predicted 7592 [Source:NCBI gene;Acc:101055758]	-	-	-	-	GO:0005634//nucleus;GO:0016021//integral component of membrane	GO:0004930//G-protein coupled receptor activity	GO:0007186//G-protein coupled receptor signaling pathway
ENSMUSG00000009092	370	344	273	54	128	92	11.39	12.71	9.28	2.02	4.53	2.97	11.1266666666667	3.17333333333333	-1.80995047605466	3.20509070050026e-10	4.49348466544017e-08	Derl3	Der1-like domain family, member 3 [Source:MGI Symbol;Acc:MGI:1917627]	Genetic Information Processing	Folding, sorting and degradation	ko04141//Protein processing in endoplasmic reticulum	K13989	GO:0000839//Hrd1p ubiquitin ligase ERAD-L complex;GO:0005783//endoplasmic reticulum;GO:0005785//signal recognition particle receptor complex;GO:0005789//endoplasmic reticulum membrane;GO:0016020//membrane;GO:0016021//integral component of membrane;GO:0030176//integral component of endoplasmic reticulum membrane;GO:0048500//signal recognition particle	GO:0051787//misfolded protein binding;GO:1990381//ubiquitin-specific protease binding	GO:0018279//protein N-linked glycosylation via asparagine;GO:0030433//ER-associated ubiquitin-dependent protein catabolic process;GO:0030968//endoplasmic reticulum unfolded protein response;GO:1904153//negative regulation of retrograde protein transport, ER to cytosol
ENSMUSG00000033355	909	1953	1901	448	480	444	30.99	77.73	71.42	18.63	19.01	16.21	60.0466666666667	17.95	-1.74210031667116	3.22861173265555e-10	4.49348466544017e-08	Rtp4	receptor transporter protein 4 [Source:MGI Symbol;Acc:MGI:1915025]	-	-	-	-	GO:0005737//cytoplasm;GO:0016020//membrane;GO:0016021//integral component of membrane	GO:0005515//protein binding;GO:0031849//olfactory receptor binding	GO:0001580//detection of chemical stimulus involved in sensory perception of bitter taste;GO:0006612//protein targeting to membrane;GO:0051205//protein insertion into membrane;GO:0051607//defense response to virus
ENSMUSG00000029859	439	274	410	715	754	775	5.40	3.92	5.58	10.84	10.77	10.03	4.96666666666667	10.5466666666667	1.08643726912327	3.34405532851635e-10	4.61332966241901e-08	Epha1	Eph receptor A1 [Source:MGI Symbol;Acc:MGI:107381]	Organismal Systems	Development	ko04360//Axon guidance	K05102	GO:0005886//plasma membrane;GO:0005887//integral component of plasma membrane;GO:0016020//membrane;GO:0016021//integral component of membrane;GO:0043005//neuron projection;GO:0043197//dendritic spine;GO:0043235//receptor complex	GO:0000166//nucleotide binding;GO:0004672//protein kinase activity;GO:0004713//protein tyrosine kinase activity;GO:0004714//transmembrane receptor protein tyrosine kinase activity;GO:0005003//ephrin receptor activity;GO:0005005//transmembrane-ephrin receptor activity;GO:0005515//protein binding;GO:0005524//ATP binding;GO:0016301//kinase activity;GO:0016740//transferase activity;GO:0019901//protei…	GO:0001525//angiogenesis;GO:0001954//positive regulation of cell-matrix adhesion;GO:0006468//protein phosphorylation;GO:0006469//negative regulation of protein kinase activity;GO:0007155//cell adhesion;GO:0007166//cell surface receptor signaling pathway;GO:0007169//transmembrane receptor protein tyrosine kinase signaling pathway;GO:0007275//multicellular organism development;GO:0007411//axon guid…
ENSMUSG00000024675	447	528	693	184	200	264	14.20	18.33	22.84	8.80	7.13	10.72	18.4566666666667	8.88333333333333	-1.05496898888386	5.5966988756176e-10	7.65385071450765e-08	Ms4a4c	membrane-spanning 4-domains, subfamily A, member 4C [Source:MGI Symbol;Acc:MGI:1927656]	-	-	-	-	GO:0005575//cellular_component;GO:0016020//membrane;GO:0016021//integral component of membrane	GO:0003674//molecular_function	GO:0008150//biological_process
ENSMUSG00000031981	65	167	81	13	8	11	1.12	3.35	1.55	0.28	0.16	0.20	2.00666666666667	0.213333333333333	-3.23361967675971	5.78633512752477e-10	7.84497349573984e-08	Capn9	calpain 9 [Source:MGI Symbol;Acc:MGI:1920897]	-	-	-	-	GO:0005737//cytoplasm	GO:0004198//calcium-dependent cysteine-type endopeptidase activity;GO:0005509//calcium ion binding;GO:0016787//hydrolase activity;GO:0046872//metal ion binding	GO:0006508//proteolysis;GO:0045214//sarcomere organization
ENSMUSG00000037849	46	169	94	7	10	5	0.61	2.98	1.38	0.12	0.16	0.06	1.65666666666667	0.113333333333333	-3.86963920031195	5.87340510470403e-10	7.89496086168208e-08	Ifi206	interferon activated gene 206 [Source:MGI Symbol;Acc:MGI:3646410]	Organismal Systems	Immune system	ko04621//NOD-like receptor signaling pathway	K20914	GO:0005634//nucleus;GO:0005654//nucleoplasm;GO:0005730//nucleolus;GO:0005829//cytosol	GO:0000978//RNA polymerase II core promoter proximal region sequence-specific DNA binding;GO:0001227//transcriptional repressor activity, RNA polymerase II transcription regulatory region sequence-specific binding;GO:0003690//double-stranded DNA binding;GO:0008134//transcription factor binding;GO:0042802//identical protein binding	GO:0000122//negative regulation of transcription from RNA polymerase II promoter;GO:0002218//activation of innate immune response;GO:0035458//cellular response to interferon-beta
ENSMUSG00000091017	152	47	51	5	6	5	2.74	0.98	1.02	0.11	0.13	0.09	1.58	0.11	-3.84434912953981	6.4535997434644e-10	8.52905572819031e-08	Fam71a	family with sequence similarity 71, member A [Source:MGI Symbol;Acc:MGI:3588202]	-	-	-	-	-	GO:0003674//molecular_function	GO:0008150//biological_process
ENSMUSG00000047222	360	349	388	35	112	33	21.01	23.67	25.00	2.52	7.58	2.03	23.2266666666667	4.04333333333333	-2.52216507347836	7.00949660349363e-10	9.18652942359535e-08	Rnase2a	ribonuclease, RNase A family, 2A (liver, eosinophil-derived neurotoxin) [Source:MGI Symbol;Acc:MGI:1890465]	-	-	-	-	-	GO:0003676//nucleic acid binding;GO:0004518//nuclease activity;GO:0004519//endonuclease activity;GO:0004540//ribonuclease activity;GO:0016787//hydrolase activity	GO:0090305//nucleic acid phosphodiester bond hydrolysis;GO:0090501//RNA phosphodiester bond hydrolysis
ENSMUSG00000091649	179	355	309	39	42	89	6.07	14.02	11.62	1.65	1.66	3.19	10.57	2.16666666666667	-2.28642625418802	7.20859791642221e-10	9.36939003566711e-08	Phf11b	PHD finger protein 11B [Source:MGI Symbol;Acc:MGI:3645789]	Metabolism;Metabolism	Global and overview maps;Amino acid metabolism	ko01100//Metabolic pathways;ko00310//Lysine degradation	K18494;K18494	GO:0005654//nucleoplasm;GO:0031965//nuclear membrane	GO:0003674//molecular_function;GO:0046872//metal ion binding	GO:0008150//biological_process
ENSMUSG00000096833	2655	1788	1747	359	116	239	282.05	220.75	204.96	47.01	14.30	26.69	235.92	29.3333333333333	-3.00768479937087	9.52149151215763e-10	1.19795597609362e-07	Igkv4-55	immunoglobulin kappa variable 4-55 [Source:MGI Symbol;Acc:MGI:2686370]	-	-	-	-	-	-	-
ENSMUSG00000035208	683	1824	1221	296	351	308	7.49	24.38	15.90	4.01	4.58	3.66	15.9233333333333	4.08333333333333	-1.96332312758133	1.16178013722158e-09	1.45010446175269e-07	Slfn8	schlafen 8 [Source:MGI Symbol;Acc:MGI:2672859]	-	-	-	-	GO:0005737//cytoplasm	GO:0000049//tRNA binding;GO:0000166//nucleotide binding;GO:0004518//nuclease activity;GO:0004519//endonuclease activity;GO:0004521//endoribonuclease activity;GO:0005524//ATP binding;GO:0008270//zinc ion binding;GO:0016787//hydrolase activity;GO:0046872//metal ion binding	GO:0002376//immune system process;GO:0016075//rRNA catabolic process;GO:0016078//tRNA catabolic process;GO:0051607//defense response to virus;GO:0090305//nucleic acid phosphodiester bond hydrolysis;GO:0090502//RNA phosphodiester bond hydrolysis, endonucleolytic
ENSMUSG00000031438	415	679	389	152	153	177	6.20	11.74	6.44	2.83	2.68	2.80	8.12666666666667	2.77	-1.55277774384987	1.38157859353782e-09	1.69750676098197e-07	Rnf128	ring finger protein 128 [Source:MGI Symbol;Acc:MGI:1914139]	-	-	-	-	GO:0005737//cytoplasm;GO:0005770//late endosome;GO:0005783//endoplasmic reticulum;GO:0005794//Golgi apparatus;GO:0005856//cytoskeleton;GO:0012505//endomembrane system;GO:0016020//membrane;GO:0016021//integral component of membrane;GO:0048471//perinuclear region of cytoplasm	GO:0016740//transferase activity;GO:0046872//metal ion binding;GO:0061630//ubiquitin protein ligase activity	GO:0006511//ubiquitin-dependent protein catabolic process;GO:0016567//protein ubiquitination;GO:0031647//regulation of protein stability;GO:0042036//negative regulation of cytokine biosynthetic process
ENSMUSG00000026981	582	896	591	178	214	317	18.91	28.06	16.59	6.00	6.10	9.90	21.1866666666667	7.33333333333333	-1.5306156009365	1.53590475724011e-09	1.87249411760583e-07	Il1rn	interleukin 1 receptor antagonist [Source:MGI Symbol;Acc:MGI:96547]	Environmental Information Processing	Signaling molecules and interaction	ko04060//Cytokine-cytokine receptor interaction	K05481	GO:0005576//extracellular region;GO:0005615//extracellular space;GO:0005737//cytoplasm;GO:0031982//vesicle	GO:0005125//cytokine activity;GO:0005149//interleukin-1 receptor binding;GO:0005150//interleukin-1, Type I receptor binding;GO:0005151//interleukin-1, Type II receptor binding;GO:0005152//interleukin-1 receptor antagonist activity;GO:0045352//interleukin-1 Type I receptor antagonist activity;GO:0045353//interleukin-1 Type II receptor antagonist activity	GO:0001660//fever generation;GO:0002437//inflammatory response to antigenic stimulus;GO:0006629//lipid metabolic process;GO:0006953//acute-phase response;GO:0006954//inflammatory response;GO:0006955//immune response;GO:0007165//signal transduction;GO:0007613//memory;GO:0014050//negative regulation of glutamate secretion;GO:0019233//sensory perception of pain;GO:0030073//insulin secretion;GO:00303…
ENSMUSG00000026535	290	685	589	64	128	152	6.89	18.88	15.42	1.88	3.53	3.79	13.73	3.06666666666667	-2.16258835992388	2.86953944429879e-09	3.39317645417196e-07	Ifi202b	interferon activated gene 202B [Source:MGI Symbol;Acc:MGI:1347083]	Organismal Systems	Immune system	ko04623//Cytosolic DNA-sensing pathway	K12971	GO:0005634//nucleus;GO:0005730//nucleolus;GO:0005737//cytoplasm	GO:0003677//DNA binding;GO:0003690//double-stranded DNA binding;GO:0005515//protein binding	GO:0002218//activation of innate immune response;GO:0002376//immune system process;GO:0006954//inflammatory response;GO:0009617//response to bacterium;GO:0032731//positive regulation of interleukin-1 beta production;GO:0035458//cellular response to interferon-beta;GO:0043154//negative regulation of cysteine-type endopeptidase activity involved in apoptotic process;GO:0045087//innate immune respon…
ENSMUSG00000038209	273	339	214	45	87	100	9.63	13.90	8.34	1.96	3.56	3.71	10.6233333333333	3.07666666666667	-1.78779646613207	3.03185815651623e-09	3.55836068862169e-07	Itln1	intelectin 1 (galactofuranose binding) [Source:MGI Symbol;Acc:MGI:1333831]	-	-	-	-	GO:0005576//extracellular region;GO:0005886//plasma membrane;GO:0016020//membrane;GO:0031225//anchored component of membrane;GO:0031526//brush border membrane;GO:0043235//receptor complex;GO:0045121//membrane raft	GO:0005509//calcium ion binding;GO:0030246//carbohydrate binding;GO:0042802//identical protein binding;GO:0046872//metal ion binding;GO:0070492//oligosaccharide binding	GO:0001934//positive regulation of protein phosphorylation;GO:0009624//response to nematode;GO:0046326//positive regulation of glucose import;GO:0070207//protein homotrimerization
ENSMUSG00000043263	293	582	457	129	141	141	5.22	11.63	8.67	2.45	2.83	2.25	8.50666666666667	2.51	-1.76090655909294	3.61223514725369e-09	4.20812016006362e-07	Ifi209	interferon activated gene 209 [Source:MGI Symbol;Acc:MGI:2138243]	Organismal Systems	Immune system	ko04621//NOD-like receptor signaling pathway	K20914	GO:0005634//nucleus;GO:0005654//nucleoplasm;GO:0005730//nucleolus;GO:0005829//cytosol	GO:0000978//RNA polymerase II core promoter proximal region sequence-specific DNA binding;GO:0001227//transcriptional repressor activity, RNA polymerase II transcription regulatory region sequence-specific binding;GO:0003690//double-stranded DNA binding;GO:0008134//transcription factor binding;GO:0042802//identical protein binding	GO:0000122//negative regulation of transcription from RNA polymerase II promoter;GO:0002218//activation of innate immune response;GO:0035458//cellular response to interferon-beta
ENSMUSG00000054203	199	191	243	63	83	99	4.97	5.55	6.70	1.94	2.41	2.60	5.74	2.31666666666667	-1.30900025978597	3.91443596508035e-09	4.49360105276048e-07	Ifi205	interferon activated gene 205 [Source:MGI Symbol;Acc:MGI:101847]	Organismal Systems	Immune system	ko04621//NOD-like receptor signaling pathway	K20914	GO:0005634//nucleus;GO:0005654//nucleoplasm;GO:0005730//nucleolus;GO:0005829//cytosol	GO:0000978//RNA polymerase II core promoter proximal region sequence-specific DNA binding;GO:0001227//transcriptional repressor activity, RNA polymerase II transcription regulatory region sequence-specific binding;GO:0003690//double-stranded DNA binding;GO:0008134//transcription factor binding;GO:0042802//identical protein binding	GO:0000122//negative regulation of transcription from RNA polymerase II promoter;GO:0002218//activation of innate immune response;GO:0009617//response to bacterium;GO:0032731//positive regulation of interleukin-1 beta production;GO:0035458//cellular response to interferon-beta
ENSMUSG00000075307	0	0	0	20	56	46	0.00	0.00	0.00	0.40	1.04	0.78	0.001	0.74	9.53138146051631	4.4876944046748e-09	5.07755179153385e-07	Klhl41	kelch-like 41 [Source:MGI Symbol;Acc:MGI:2683854]	-	-	-	-	GO:0001726//ruffle;GO:0005654//nucleoplasm;GO:0005737//cytoplasm;GO:0005783//endoplasmic reticulum;GO:0005789//endoplasmic reticulum membrane;GO:0005829//cytosol;GO:0005856//cytoskeleton;GO:0005886//plasma membrane;GO:0016020//membrane;GO:0016529//sarcoplasmic reticulum;GO:0031143//pseudopodium;GO:0031430//M band;GO:0031463//Cul3-RING ubiquitin ligase complex;GO:0033017//sarcoplasmic reticulum me…	GO:0005515//protein binding	GO:0016567//protein ubiquitination;GO:0030239//myofibril assembly;GO:0031275//regulation of lateral pseudopodium assembly;GO:0035914//skeletal muscle cell differentiation;GO:0045214//sarcomere organization;GO:0045661//regulation of myoblast differentiation;GO:0048741//skeletal muscle fiber development;GO:2000291//regulation of myoblast proliferation;GO:2001014//regulation of skeletal muscle cell …
ENSMUSG00000095285	344	91	380	26	49	43	33.09	10.19	40.40	3.06	5.49	4.38	27.8933333333333	4.31	-2.69416057643669	4.95661946462887e-09	5.48963058593086e-07	Ighv5-9	immunoglobulin heavy variable 5-9 [Source:MGI Symbol;Acc:MGI:4439873]	Environmental Information Processing;Human Diseases;Human Diseases;Environmental Information Processing;Cellular Processes;Human Diseases;Human Diseases;Environmental Information Processing;Human Diseases;Human Diseases;Human Diseases;Environmental Information Processing;Organismal Systems;Human Diseases;Human Diseases;Organismal Systems;Organismal Systems;Human Diseases;Organismal Systems;Human …	Signal transduction;Infectious diseases;Infectious diseases;Signal transduction;Transport and catabolism;Cancers;Infectious diseases;Signal transduction;Immune diseases;Infectious diseases;Infectious diseases;Signal transduction;Immune system;Immune diseases;Cardiovascular diseases;Immune system;Immune system;Cardiovascular diseases;Immune system;Immune diseases;Infectious diseases;Immune system;…	ko04151//PI3K-Akt signaling pathway;ko05169//Epstein-Barr virus infection;ko05130//Pathogenic Escherichia coli infection;ko04020//Calcium signaling pathway;ko04145//Phagosome;ko05202//Transcriptional misregulation in cancers;ko05152//Tuberculosis;ko04072//Phospholipase D signaling pathway;ko05322//Systemic lupus erythematosus;ko05150//Staphylococcus aureus infection;ko05146//Amoebiasis;ko04064//N…	K06856;K06856;K06856;K06856;K06856;K06856;K06856;K06856;K06856;K06856;K06856;K06856;K06856;K06856;K06856;K06856;K06856;K06856;K06856;K06856;K06856;K06856;K06856;K06856;K06856;K06856;K06856	GO:0009897//external side of plasma membrane;GO:0042571//immunoglobulin complex, circulating	GO:0003823//antigen binding;GO:0034987//immunoglobulin receptor binding	GO:0006910//phagocytosis, recognition;GO:0006911//phagocytosis, engulfment;GO:0006958//complement activation, classical pathway;GO:0042742//defense response to bacterium;GO:0045087//innate immune response;GO:0050853//B cell receptor signaling pathway;GO:0050871//positive regulation of B cell activation
ENSMUSG00000002588	445	272	389	698	651	948	12.03	8.77	12.20	24.47	20.67	27.12	11	24.0866666666667	1.13073123029927	5.78328040137015e-09	6.14551695083435e-07	Pon1	paraoxonase 1 [Source:MGI Symbol;Acc:MGI:103295]	-	-	-	-	GO:0005576//extracellular region;GO:0005615//extracellular space;GO:0034364//high-density lipoprotein particle;GO:0034366//spherical high-density lipoprotein particle;GO:0043231//intracellular membrane-bounded organelle	GO:0004063//aryldialkylphosphatase activity;GO:0004064//arylesterase activity;GO:0005509//calcium ion binding;GO:0005543//phospholipid binding;GO:0008035//high-density lipoprotein particle binding;GO:0016787//hydrolase activity;GO:0042803//protein homodimerization activity;GO:0046872//metal ion binding	GO:0006629//lipid metabolic process;GO:0008015//blood circulation;GO:0008203//cholesterol metabolic process;GO:0009636//response to toxic substance;GO:0010875//positive regulation of cholesterol efflux;GO:0016311//dephosphorylation;GO:0019439//aromatic compound catabolic process;GO:0031667//response to nutrient levels;GO:0032411//positive regulation of transporter activity;GO:0046395//carboxylic …
ENSMUSG00000057719	536	360	512	955	775	983	4.27	3.35	4.51	10.64	7.50	8.31	4.04333333333333	8.81666666666667	1.12468817188088	7.33509778120516e-09	7.68119002301441e-07	Sh3rf2	SH3 domain containing ring finger 2 [Source:MGI Symbol;Acc:MGI:2444628]	-	-	-	-	GO:0005634//nucleus;GO:0005654//nucleoplasm	GO:0004864//protein phosphatase inhibitor activity;GO:0005515//protein binding;GO:0008157//protein phosphatase 1 binding;GO:0016740//transferase activity;GO:0019902//phosphatase binding;GO:0046872//metal ion binding;GO:0061630//ubiquitin protein ligase activity	GO:0010923//negative regulation of phosphatase activity;GO:0016567//protein ubiquitination;GO:0030335//positive regulation of cell migration;GO:0031397//negative regulation of protein ubiquitination;GO:0032436//positive regulation of proteasomal ubiquitin-dependent protein catabolic process;GO:0032515//negative regulation of phosphoprotein phosphatase activity;GO:0043066//negative regulation of a…
ENSMUSG00000021886	253	240	225	106	92	125	4.92	5.43	4.84	2.54	2.08	2.56	5.06333333333333	2.39333333333333	-1.08106612067903	7.3749583103909e-09	7.68119002301441e-07	Gpr65	G-protein coupled receptor 65 [Source:MGI Symbol;Acc:MGI:108031]	-	-	-	-	GO:0005886//plasma membrane;GO:0016021//integral component of membrane	GO:0004930//G-protein coupled receptor activity	GO:0007165//signal transduction;GO:0007186//G-protein coupled receptor signaling pathway;GO:0007189//adenylate cyclase-activating G-protein coupled receptor signaling pathway;GO:0010447//response to acidic pH;GO:0031532//actin cytoskeleton reorganization;GO:0051496//positive regulation of stress fiber assembly;GO:0090630//activation of GTPase activity
ENSMUSG00000112023	466	525	342	136	144	224	12.71	16.15	10.13	4.49	4.58	6.29	12.9966666666667	5.12	-1.34392593867648	8.2343759498968e-09	8.46418500418477e-07	Lilr4b	leukocyte immunoglobulin-like receptor, subfamily B, member 4B [Source:MGI Symbol;Acc:MGI:102702]	Organismal Systems;Organismal Systems	Immune system;Development	ko04662//B cell receptor signaling pathway;ko04380//Osteoclast differentiation	K06512;K06512	GO:0016020//membrane;GO:0016021//integral component of membrane	-	-
ENSMUSG00000018927	8586	6366	6957	2894	2177	4427	240.08	206.85	214.82	99.83	70.58	130.26	220.583333333333	100.223333333333	-1.13810536264805	8.40033036789136e-09	8.5361402904596e-07	Ccl6	chemokine (C-C motif) ligand 6 [Source:MGI Symbol;Acc:MGI:98263]	Environmental Information Processing;Organismal Systems;Environmental Information Processing	Signaling molecules and interaction;Immune system;Signaling molecules and interaction	ko04060//Cytokine-cytokine receptor interaction;ko04062//Chemokine signaling pathway;ko04061//Viral protein interaction with cytokine and cytokine receptor	K05510;K05510;K05510	GO:0005576//extracellular region;GO:0005615//extracellular space	GO:0005125//cytokine activity;GO:0008009//chemokine activity;GO:0048020//CCR chemokine receptor binding	GO:0002548//monocyte chemotaxis;GO:0006935//chemotaxis;GO:0006954//inflammatory response;GO:0006955//immune response;GO:0007186//G-protein coupled receptor signaling pathway;GO:0030593//neutrophil chemotaxis;GO:0043547//positive regulation of GTPase activity;GO:0048245//eosinophil chemotaxis;GO:0048247//lymphocyte chemotaxis;GO:0060326//cell chemotaxis;GO:0070098//chemokine-mediated signaling pat…
ENSMUSG00000025355	2543	3797	1470	726	769	940	31.27	54.65	21.08	11.84	11.86	12.81	35.6666666666667	12.17	-1.55124722274099	8.47490337455868e-09	8.5361402904596e-07	Mmp19	matrix metallopeptidase 19 [Source:MGI Symbol;Acc:MGI:1927899]	-	-	-	-	GO:0005576//extracellular region;GO:0005615//extracellular space;GO:0005886//plasma membrane;GO:0016020//membrane;GO:0031012//extracellular matrix;GO:0031225//anchored component of membrane	GO:0004222//metalloendopeptidase activity;GO:0008233//peptidase activity;GO:0008237//metallopeptidase activity;GO:0008270//zinc ion binding;GO:0016787//hydrolase activity;GO:0046872//metal ion binding	GO:0001525//angiogenesis;GO:0001541//ovarian follicle development;GO:0001542//ovulation from ovarian follicle;GO:0001554//luteolysis;GO:0006508//proteolysis;GO:0007275//multicellular organism development;GO:0009725//response to hormone;GO:0030154//cell differentiation;GO:0030198//extracellular matrix organization;GO:0030574//collagen catabolic process;GO:0051591//response to cAMP
ENSMUSG00000025498	2672	7019	7342	583	921	835	56.36	173.73	172.98	15.18	22.83	18.46	134.356666666667	18.8233333333333	-2.83547387275106	8.49308847605203e-09	8.5361402904596e-07	Irf7	interferon regulatory factor 7 [Source:MGI Symbol;Acc:MGI:1859212]	Human Diseases;Human Diseases;Human Diseases;Organismal Systems;Human Diseases;Human Diseases;Human Diseases;Human Diseases;Human Diseases;Organismal Systems;Organismal Systems;Organismal Systems	Infectious diseases;Infectious diseases;Cancers;Immune system;Infectious diseases;Infectious diseases;Infectious diseases;Infectious diseases;Infectious diseases;Immune system;Immune system;Immune system	ko05168//Herpes simplex infection;ko05169//Epstein-Barr virus infection;ko05203//Viral carcinogenesis;ko04621//NOD-like receptor signaling pathway;ko05167//Kaposi sarcoma-associated herpesvirus infection;ko05164//Influenza A;ko05160//Hepatitis C;ko05161//Hepatitis B;ko05162//Measles;ko04620//Toll-like receptor signaling pathway;ko04622//RIG-I-like receptor signaling pathway;ko04623//Cytosolic DNA…	K09447;K09447;K09447;K09447;K09447;K09447;K09447;K09447;K09447;K09447;K09447;K09447	GO:0005634//nucleus;GO:0005654//nucleoplasm;GO:0005737//cytoplasm;GO:0005829//cytosol	GO:0000978//RNA polymerase II core promoter proximal region sequence-specific DNA binding;GO:0000981//RNA polymerase II transcription factor activity, sequence-specific DNA binding;GO:0000987//core promoter proximal region sequence-specific DNA binding;GO:0003677//DNA binding;GO:0003700//transcription factor activity, sequence-specific DNA binding;GO:0005515//protein binding;GO:0044212//transcrip…	GO:0002376//immune system process;GO:0002819//regulation of adaptive immune response;GO:0006355//regulation of transcription, DNA-templated;GO:0010468//regulation of gene expression;GO:0016064//immunoglobulin mediated immune response;GO:0032481//positive regulation of type I interferon production;GO:0032607//interferon-alpha production;GO:0032608//interferon-beta production;GO:0032727//positive r…
ENSMUSG00000061132	686	876	613	244	361	333	14.78	20.79	14.19	6.50	8.95	7.35	16.5866666666667	7.6	-1.1259526610785	9.37449185076894e-09	9.21453958356519e-07	Blnk	B cell linker [Source:MGI Symbol;Acc:MGI:96878]	Human Diseases;Environmental Information Processing;Organismal Systems;Human Diseases;Organismal Systems	Infectious diseases;Signal transduction;Immune system;Immune diseases;Development	ko05169//Epstein-Barr virus infection;ko04064//NF-kappa B signaling pathway;ko04662//B cell receptor signaling pathway;ko05340//Primary immunodeficiency;ko04380//Osteoclast differentiation	K07371;K07371;K07371;K07371;K07371	GO:0005737//cytoplasm;GO:0005886//plasma membrane;GO:0016020//membrane;GO:0036464//cytoplasmic ribonucleoprotein granule	GO:0005070//SH3/SH2 adaptor activity;GO:0005515//protein binding	GO:0007169//transmembrane receptor protein tyrosine kinase signaling pathway;GO:0009967//positive regulation of signal transduction;GO:0035556//intracellular signal transduction;GO:0042113//B cell activation
ENSMUSG00000029322	1805	1801	2674	801	889	1211	97.32	113.11	159.51	53.20	55.56	68.75	123.313333333333	59.17	-1.05939100030168	1.11884255647775e-08	1.0729290783979e-06	Plac8	placenta-specific 8 [Source:MGI Symbol;Acc:MGI:2445289]	-	-	-	-	GO:0005634//nucleus	GO:0003682//chromatin binding;GO:0005515//protein binding	GO:0008284//positive regulation of cell proliferation;GO:0009409//response to cold;GO:0040015//negative regulation of multicellular organism growth;GO:0042742//defense response to bacterium;GO:0043066//negative regulation of apoptotic process;GO:0045944//positive regulation of transcription from RNA polymerase II promoter;GO:0050873//brown fat cell differentiation
ENSMUSG00000095612	1302	2441	909	111	253	186	123.37	268.79	95.11	13.00	27.83	18.56	162.423333333333	19.7966666666667	-3.03642946438573	1.2714510754656e-08	1.21188551902106e-06	Ighv5-4	immunoglobulin heavy variable 5-4 [Source:MGI Symbol;Acc:MGI:4439895]	Environmental Information Processing;Human Diseases;Human Diseases;Environmental Information Processing;Cellular Processes;Human Diseases;Human Diseases;Environmental Information Processing;Human Diseases;Human Diseases;Human Diseases;Environmental Information Processing;Organismal Systems;Human Diseases;Human Diseases;Organismal Systems;Organismal Systems;Human Diseases;Organismal Systems;Human …	Signal transduction;Infectious diseases;Infectious diseases;Signal transduction;Transport and catabolism;Cancers;Infectious diseases;Signal transduction;Immune diseases;Infectious diseases;Infectious diseases;Signal transduction;Immune system;Immune diseases;Cardiovascular diseases;Immune system;Immune system;Cardiovascular diseases;Immune system;Immune diseases;Infectious diseases;Immune system;…	ko04151//PI3K-Akt signaling pathway;ko05169//Epstein-Barr virus infection;ko05130//Pathogenic Escherichia coli infection;ko04020//Calcium signaling pathway;ko04145//Phagosome;ko05202//Transcriptional misregulation in cancers;ko05152//Tuberculosis;ko04072//Phospholipase D signaling pathway;ko05322//Systemic lupus erythematosus;ko05150//Staphylococcus aureus infection;ko05146//Amoebiasis;ko04064//N…	K06856;K06856;K06856;K06856;K06856;K06856;K06856;K06856;K06856;K06856;K06856;K06856;K06856;K06856;K06856;K06856;K06856;K06856;K06856;K06856;K06856;K06856;K06856;K06856;K06856;K06856;K06856	GO:0009897//external side of plasma membrane;GO:0042571//immunoglobulin complex, circulating	GO:0003823//antigen binding;GO:0034987//immunoglobulin receptor binding	GO:0006910//phagocytosis, recognition;GO:0006911//phagocytosis, engulfment;GO:0006958//complement activation, classical pathway;GO:0042742//defense response to bacterium;GO:0045087//innate immune response;GO:0050853//B cell receptor signaling pathway;GO:0050871//positive regulation of B cell activation
ENSMUSG00000036814	222	390	261	99	79	87	4.46	6.96	5.29	2.72	1.92	1.46	5.57	2.03333333333333	-1.45383058561094	1.31534113175442e-08	1.24616686621095e-06	Slc6a20a	solute carrier family 6 (neurotransmitter transporter), member 20A [Source:MGI Symbol;Acc:MGI:2143217]	-	-	-	-	GO:0005886//plasma membrane;GO:0005887//integral component of plasma membrane;GO:0016020//membrane;GO:0016021//integral component of membrane;GO:0016324//apical plasma membrane	GO:0005328//neurotransmitter:sodium symporter activity;GO:0015171//amino acid transmembrane transporter activity;GO:0015193//L-proline transmembrane transporter activity;GO:0015293//symporter activity	GO:0006836//neurotransmitter transport;GO:0006865//amino acid transport;GO:0015816//glycine transport;GO:0015824//proline transport;GO:0015838//amino-acid betaine transport;GO:0035524//proline transmembrane transport;GO:0055085//transmembrane transport
ENSMUSG00000022180	337	319	241	84	138	129	3.32	3.65	2.63	1.02	1.58	1.34	3.2	1.31333333333333	-1.28483877615215	1.392978373241e-08	1.30401017118817e-06	Slc7a8	solute carrier family 7 (cationic amino acid transporter, y+ system), member 8 [Source:MGI Symbol;Acc:MGI:1355323]	Organismal Systems	Digestive system	ko04974//Protein digestion and absorption	K13781	GO:0005737//cytoplasm;GO:0005886//plasma membrane;GO:0016020//membrane;GO:0016021//integral component of membrane;GO:0016323//basolateral plasma membrane	GO:0005275//amine transmembrane transporter activity;GO:0015101//organic cation transmembrane transporter activity;GO:0015171//amino acid transmembrane transporter activity;GO:0015175//neutral amino acid transmembrane transporter activity;GO:0015179//L-amino acid transmembrane transporter activity;GO:0019534//toxin transporter activity;GO:0022857//transmembrane transporter activity	GO:0003333//amino acid transmembrane transport;GO:0006865//amino acid transport;GO:0015695//organic cation transport;GO:0015804//neutral amino acid transport;GO:0015807//L-amino acid transport;GO:0015837//amine transport;GO:0055085//transmembrane transport;GO:1901998//toxin transport;GO:1902475//L-alpha-amino acid transmembrane transport
ENSMUSG00000022901	327	373	411	150	193	179	7.76	10.72	10.13	4.00	5.05	4.88	9.53666666666667	4.64333333333333	-1.03832423972193	1.585648171945e-08	1.44147334105081e-06	Cd86	CD86 antigen [Source:MGI Symbol;Acc:MGI:101773]	Human Diseases;Human Diseases;Human Diseases;Human Diseases;Human Diseases;Human Diseases;Human Diseases;Environmental Information Processing;Organismal Systems;Organismal Systems;Human Diseases;Human Diseases	Cancers;Immune diseases;Immune diseases;Infectious diseases;Cardiovascular diseases;Immune diseases;Immune diseases;Signaling molecules and interaction;Immune system;Immune system;Endocrine and metabolic diseases;Immune diseases	ko05202//Transcriptional misregulation in cancers;ko05322//Systemic lupus erythematosus;ko05323//Rheumatoid arthritis;ko05167//Kaposi sarcoma-associated herpesvirus infection;ko05416//Viral myocarditis;ko05320//Autoimmune thyroid disease;ko05330//Allograft rejection;ko04514//Cell adhesion molecules (CAMs);ko04672//Intestinal immune network for IgA production;ko04620//Toll-like receptor signaling …	K05413;K05413;K05413;K05413;K05413;K05413;K05413;K05413;K05413;K05413;K05413;K05413	GO:0005886//plasma membrane;GO:0009897//external side of plasma membrane;GO:0009986//cell surface;GO:0016020//membrane;GO:0016021//integral component of membrane;GO:0043231//intracellular membrane-bounded organelle;GO:0070062//extracellular exosome	GO:0005102//receptor binding	GO:0002224//toll-like receptor signaling pathway;GO:0002250//adaptive immune response;GO:0002376//immune system process;GO:0002668//negative regulation of T cell anergy;GO:0006955//immune response;GO:0007165//signal transduction;GO:0007166//cell surface receptor signaling pathway;GO:0031295//T cell costimulation;GO:0034138//toll-like receptor 3 signaling pathway;GO:0042102//positive regulation of…
ENSMUSG00000038179	488	582	427	142	249	204	13.18	17.40	13.30	4.73	6.67	5.84	14.6266666666667	5.74666666666667	-1.3478037513141	1.61789154593618e-08	1.46233220361714e-06	Slamf7	SLAM family member 7 [Source:MGI Symbol;Acc:MGI:1922595]	-	-	-	-	GO:0016020//membrane;GO:0016021//integral component of membrane	-	-
ENSMUSG00000033808	452	459	512	106	233	186	6.82	8.32	9.22	2.44	4.99	4.21	8.12	3.88	-1.06542307499805	1.74025228175004e-08	1.56393986486188e-06	Tmem87a	transmembrane protein 87A [Source:MGI Symbol;Acc:MGI:2441844]	-	-	-	-	GO:0005829//cytosol;GO:0016020//membrane;GO:0016021//integral component of membrane;GO:0032580//Golgi cisterna membrane	-	GO:0042147//retrograde transport, endosome to Golgi
ENSMUSG00000019987	304	545	178	35	82	74	8.29	17.27	5.36	1.18	2.59	2.12	10.3066666666667	1.96333333333333	-2.39220078009439	1.8959397972948e-08	1.69417302227587e-06	Arg1	arginase, liver [Source:MGI Symbol;Acc:MGI:88070]	Metabolism;Human Diseases;Metabolism;Metabolism;Metabolism	Global and overview maps;Infectious diseases;Global and overview maps;Amino acid metabolism;Amino acid metabolism	ko01100//Metabolic pathways;ko05146//Amoebiasis;ko01230//Biosynthesis of amino acids;ko00330//Arginine and proline metabolism;ko00220//Arginine biosynthesis	K01476;K01476;K01476;K01476;K01476	GO:0005615//extracellular space;GO:0005737//cytoplasm;GO:0005741//mitochondrial outer membrane;GO:0005829//cytosol;GO:0043005//neuron projection;GO:0043025//neuronal cell body	GO:0004053//arginase activity;GO:0016787//hydrolase activity;GO:0016813//hydrolase activity, acting on carbon-nitrogen (but not peptide) bonds, in linear amidines;GO:0030145//manganese ion binding;GO:0042802//identical protein binding;GO:0046872//metal ion binding	GO:0000050//urea cycle;GO:0001889//liver development;GO:0001938//positive regulation of endothelial cell proliferation;GO:0002250//adaptive immune response;GO:0002376//immune system process;GO:0006525//arginine metabolic process;GO:0007565//female pregnancy;GO:0007568//aging;GO:0009611//response to wounding;GO:0009635//response to herbicide;GO:0010042//response to manganese ion;GO:0010043//respon…
ENSMUSG00000079457	79	165	151	30	24	30	2.38	6.02	4.92	1.16	0.89	0.97	4.44	1.00666666666667	-2.14097362774618	2.50874350410052e-08	2.17983475629772e-06	Gm7609	predicted pseudogene 7609 [Source:MGI Symbol;Acc:MGI:3644536]	-	-	-	-	GO:0016021//integral component of membrane	-	-
ENSMUSG00000078945	153	37	367	0	0	0	1.28	0.36	3.45	0.00	0.00	0.00	1.69666666666667	0.001	-10.7284874402419	2.67321938714294e-08	2.30998468690094e-06	Naip2	NLR family, apoptosis inhibitory protein 2 [Source:MGI Symbol;Acc:MGI:1298226]	Human Diseases;Human Diseases;Human Diseases;Organismal Systems;Human Diseases	Infectious diseases;Infectious diseases;Infectious diseases;Immune system;Infectious diseases	ko05130//Pathogenic Escherichia coli infection;ko05131//Shigellosis;ko05132//Salmonella infection;ko04621//NOD-like receptor signaling pathway;ko05134//Legionellosis	K12807;K12807;K12807;K12807;K12807	GO:0072557//IPAF inflammasome complex	GO:0000166//nucleotide binding;GO:0005515//protein binding;GO:0005524//ATP binding;GO:0043027//cysteine-type endopeptidase inhibitor activity involved in apoptotic process;GO:0046872//metal ion binding	GO:0002376//immune system process;GO:0006915//apoptotic process;GO:0006954//inflammatory response;GO:0016045//detection of bacterium;GO:0042742//defense response to bacterium;GO:0043066//negative regulation of apoptotic process;GO:0043154//negative regulation of cysteine-type endopeptidase activity involved in apoptotic process;GO:0045087//innate immune response;GO:0070269//pyroptosis;GO:0071391/…
ENSMUSG00000006931	107	107	113	191	216	274	1.97	2.30	2.30	4.35	4.62	5.33	2.19	4.76666666666667	1.12204987134342	2.69195805373354e-08	2.31346580934795e-06	P3h4	prolyl 3-hydroxylase family member 4 (non-enzymatic) [Source:MGI Symbol;Acc:MGI:1913430]	-	-	-	-	GO:0000795//synaptonemal complex;GO:0005783//endoplasmic reticulum;GO:1902494//catalytic complex	GO:0005515//protein binding	GO:0017185//peptidyl-lysine hydroxylation;GO:0030199//collagen fibril organization;GO:0032964//collagen biosynthetic process;GO:0046849//bone remodeling
ENSMUSG00000076526	248	403	139	16	65	35	28.78	54.34	17.81	2.29	8.75	4.27	33.6433333333333	5.10333333333333	-2.72080887071873	3.49922009992705e-08	2.93724261579291e-06	Igkv12-98	immunoglobulin kappa variable 12-98 [Source:MGI Symbol;Acc:MGI:4439560]	-	-	-	-	GO:0005615//extracellular space	-	GO:0002377//immunoglobulin production;GO:0006955//immune response
ENSMUSG00000029298	1841	3095	2931	1102	1131	1197	24.05	47.03	40.80	17.73	17.48	16.86	37.2933333333333	17.3566666666667	-1.10342784708594	3.53296651339336e-08	2.93983938392261e-06	Gbp9	guanylate-binding protein 9 [Source:MGI Symbol;Acc:MGI:3605620]	-	-	-	-	GO:0020005//symbiont-containing vacuole membrane;GO:0031410//cytoplasmic vesicle	GO:0000166//nucleotide binding;GO:0003924//GTPase activity;GO:0005525//GTP binding	GO:0042832//defense response to protozoan;GO:0044406//adhesion of symbiont to host;GO:0050830//defense response to Gram-positive bacterium;GO:0071346//cellular response to interferon-gamma
ENSMUSG00000029798	585	1543	1318	341	318	336	4.94	15.15	12.29	3.55	3.12	2.99	10.7933333333333	3.22	-1.74500789146679	3.64334392832793e-08	3.01572999793755e-06	Herc6	hect domain and RLD 6 [Source:MGI Symbol;Acc:MGI:1914388]	-	-	-	-	GO:0005654//nucleoplasm;GO:0005737//cytoplasm;GO:0005829//cytosol	GO:0004842//ubiquitin-protein transferase activity;GO:0016740//transferase activity;GO:0061630//ubiquitin protein ligase activity	GO:0002244//hematopoietic progenitor cell differentiation;GO:0002376//immune system process;GO:0009617//response to bacterium;GO:0016567//protein ubiquitination;GO:0045087//innate immune response
ENSMUSG00000022586	46	81	88	7	8	16	2.50	5.46	5.62	0.46	0.56	1.06	4.52666666666667	0.693333333333333	-2.70682804610364	3.8503923724592e-08	3.17042517495632e-06	Ly6i	lymphocyte antigen 6 complex, locus I [Source:MGI Symbol;Acc:MGI:1888480]	-	-	-	-	GO:0005886//plasma membrane;GO:0016020//membrane;GO:0031225//anchored component of membrane;GO:0045202//synapse	GO:0030550//acetylcholine receptor inhibitor activity;GO:0033130//acetylcholine receptor binding	GO:2000272//negative regulation of receptor activity
ENSMUSG00000037974	609	604	496	88	128	280	2.28	2.63	2.05	0.41	0.55	1.10	2.32	0.686666666666667	-1.75644296866551	3.91393108521027e-08	3.20595803005739e-06	Muc5ac	mucin 5, subtypes A and C, tracheobronchial/gastric [Source:MGI Symbol;Acc:MGI:104697]	Organismal Systems	Immune system	ko04657//IL-17 signaling pathway	K21125	GO:0005576//extracellular region;GO:0005615//extracellular space;GO:0005737//cytoplasm;GO:0070701//mucus layer	GO:0005515//protein binding	GO:0036438//maintenance of lens transparency;GO:0048015//phosphatidylinositol-mediated signaling
ENSMUSG00000043832	812	750	647	306	270	466	25.60	27.65	22.75	11.84	10.07	15.62	25.3333333333333	12.51	-1.01795512833133	4.58832202242882e-08	3.68166022687439e-06	Clec4a3	C-type lectin domain family 4, member a3 [Source:MGI Symbol;Acc:MGI:1920399]	-	-	-	-	GO:0005575//cellular_component;GO:0016020//membrane;GO:0016021//integral component of membrane	GO:0003674//molecular_function;GO:0004190//aspartic-type endopeptidase activity;GO:0030246//carbohydrate binding	GO:0006508//proteolysis;GO:0008150//biological_process
ENSMUSG00000041117	203	157	166	399	347	322	1.70	1.53	1.53	4.12	3.37	2.84	1.58666666666667	3.44333333333333	1.11780677555711	5.45967192449339e-08	4.27964875832e-06	Ccdc8	coiled-coil domain containing 8 [Source:MGI Symbol;Acc:MGI:3612184]	-	-	-	-	GO:0005654//nucleoplasm;GO:0005737//cytoplasm;GO:0005813//centrosome;GO:0005815//microtubule organizing center;GO:0005829//cytosol;GO:0005856//cytoskeleton;GO:0005886//plasma membrane;GO:1990393//3M complex	-	GO:0000226//microtubule cytoskeleton organization;GO:0007088//regulation of mitotic nuclear division;GO:0010923//negative regulation of phosphatase activity
ENSMUSG00000041324	151	312	119	35	36	50	1.79	4.41	1.26	0.37	0.60	0.62	2.48666666666667	0.53	-2.23014886497088	5.85892046495591e-08	4.516825595704e-06	Inhba	inhibin beta-A [Source:MGI Symbol;Acc:MGI:96570]	Environmental Information Processing;Cellular Processes;Environmental Information Processing	Signaling molecules and interaction;Cellular community - eukaryotes;Signal transduction	ko04060//Cytokine-cytokine receptor interaction;ko04550//Signaling pathways regulating pluripotency of stem cells;ko04350//TGF-beta signaling pathway	K04667;K04667;K04667	GO:0005576//extracellular region;GO:0005615//extracellular space;GO:0043509//activin A complex;GO:0043512//inhibin A complex;GO:0048471//perinuclear region of cytoplasm	GO:0005102//receptor binding;GO:0005125//cytokine activity;GO:0005179//hormone activity;GO:0008083//growth factor activity;GO:0017046//peptide hormone binding;GO:0034711//inhibin binding;GO:0042802//identical protein binding;GO:0044877//macromolecular complex binding;GO:0070699//type II activin receptor binding	GO:0000082//G1/S transition of mitotic cell cycle;GO:0001541//ovarian follicle development;GO:0001707//mesoderm formation;GO:0001942//hair follicle development;GO:0002244//hematopoietic progenitor cell differentiation;GO:0006357//regulation of transcription from RNA polymerase II promoter;GO:0007050//cell cycle arrest;GO:0008285//negative regulation of cell proliferation;GO:0008584//male gonad de…
ENSMUSG00000026628	4713	1064	1406	204	235	228	95.64	25.10	31.50	5.11	5.89	5.99	50.7466666666667	5.66333333333333	-3.1635897090898	6.22337257789341e-08	4.77438929426974e-06	Atf3	activating transcription factor 3 [Source:MGI Symbol;Acc:MGI:109384]	-	-	-	-	GO:0005634//nucleus;GO:0005654//nucleoplasm;GO:0005730//nucleolus;GO:1990622//CHOP-ATF3 complex	GO:0000976//transcription regulatory region sequence-specific DNA binding;GO:0000977//RNA polymerase II regulatory region sequence-specific DNA binding;GO:0000978//RNA polymerase II core promoter proximal region sequence-specific DNA binding;GO:0000981//RNA polymerase II transcription factor activity, sequence-specific DNA binding;GO:0001227//transcriptional repressor activity, RNA polymerase II …	GO:0000122//negative regulation of transcription from RNA polymerase II promoter;GO:0006094//gluconeogenesis;GO:0006355//regulation of transcription, DNA-templated;GO:0006357//regulation of transcription from RNA polymerase II promoter;GO:0008284//positive regulation of cell proliferation;GO:0010628//positive regulation of gene expression;GO:0030968//endoplasmic reticulum unfolded protein respons…
ENSMUSG00000095863	267	339	249	12	79	54	30.63	45.19	31.54	1.70	10.51	6.52	35.7866666666667	6.24333333333333	-2.51903377195714	7.04367426244463e-08	5.34201115078256e-06	Ighv1-67	immunoglobulin heavy variable V1-67 [Source:MGI Symbol;Acc:MGI:3645228]	Environmental Information Processing;Human Diseases;Human Diseases;Environmental Information Processing;Cellular Processes;Human Diseases;Human Diseases;Environmental Information Processing;Human Diseases;Human Diseases;Human Diseases;Environmental Information Processing;Organismal Systems;Human Diseases;Human Diseases;Organismal Systems;Organismal Systems;Human Diseases;Organismal Systems;Human …	Signal transduction;Infectious diseases;Infectious diseases;Signal transduction;Transport and catabolism;Cancers;Infectious diseases;Signal transduction;Immune diseases;Infectious diseases;Infectious diseases;Signal transduction;Immune system;Immune diseases;Cardiovascular diseases;Immune system;Immune system;Cardiovascular diseases;Immune system;Immune diseases;Infectious diseases;Immune system;…	ko04151//PI3K-Akt signaling pathway;ko05169//Epstein-Barr virus infection;ko05130//Pathogenic Escherichia coli infection;ko04020//Calcium signaling pathway;ko04145//Phagosome;ko05202//Transcriptional misregulation in cancers;ko05152//Tuberculosis;ko04072//Phospholipase D signaling pathway;ko05322//Systemic lupus erythematosus;ko05150//Staphylococcus aureus infection;ko05146//Amoebiasis;ko04064//N…	K06856;K06856;K06856;K06856;K06856;K06856;K06856;K06856;K06856;K06856;K06856;K06856;K06856;K06856;K06856;K06856;K06856;K06856;K06856;K06856;K06856;K06856;K06856;K06856;K06856;K06856;K06856	GO:0009897//external side of plasma membrane;GO:0042571//immunoglobulin complex, circulating	GO:0003823//antigen binding;GO:0034987//immunoglobulin receptor binding	GO:0006910//phagocytosis, recognition;GO:0006911//phagocytosis, engulfment;GO:0006958//complement activation, classical pathway;GO:0042742//defense response to bacterium;GO:0045087//innate immune response;GO:0050853//B cell receptor signaling pathway;GO:0050871//positive regulation of B cell activation
ENSMUSG00000028238	2557	3151	1497	948	812	1019	40.55	58.07	26.22	18.55	14.93	17.00	41.6133333333333	16.8266666666667	-1.30629644693666	7.13215524825593e-08	5.36686151145077e-06	Atp6v0d2	ATPase, H+ transporting, lysosomal V0 subunit D2 [Source:MGI Symbol;Acc:MGI:1924415]	Metabolism;Human Diseases;Cellular Processes;Human Diseases;Human Diseases;Human Diseases;Cellular Processes;Metabolism;Organismal Systems;Human Diseases;Human Diseases;Organismal Systems	Global and overview maps;Infectious diseases;Transport and catabolism;Infectious diseases;Cancers;Immune diseases;Transport and catabolism;Energy metabolism;Nervous system;Infectious diseases;Infectious diseases;Excretory system	ko01100//Metabolic pathways;ko05165//Human papillomavirus infection;ko04145//Phagosome;ko05152//Tuberculosis;ko05203//Viral carcinogenesis;ko05323//Rheumatoid arthritis;ko04142//Lysosome;ko00190//Oxidative phosphorylation;ko04721//Synaptic vesicle cycle;ko05120//Epithelial cell signaling in Helicobacter pylori infection;ko05110//Vibrio cholerae infection;ko04966//Collecting duct acid secretion	K02146;K02146;K02146;K02146;K02146;K02146;K02146;K02146;K02146;K02146;K02146;K02146	GO:0005623//cell;GO:0005765//lysosomal membrane;GO:0005768//endosome;GO:0005769//early endosome;GO:0016020//membrane;GO:0016324//apical plasma membrane;GO:0016471//vacuolar proton-transporting V-type ATPase complex;GO:0033179//proton-transporting V-type ATPase, V0 domain;GO:0033181//plasma membrane proton-transporting V-type ATPase complex	GO:0008553//hydrogen-exporting ATPase activity, phosphorylative mechanism;GO:0015078//hydrogen ion transmembrane transporter activity;GO:0046961//proton-transporting ATPase activity, rotational mechanism	GO:0006811//ion transport;GO:0007034//vacuolar transport;GO:0007035//vacuolar acidification;GO:1902600//hydrogen ion transmembrane transport
ENSMUSG00000063011	1231	902	826	1717	1922	3984	23.28	19.76	17.18	40.11	42.11	79.45	20.0733333333333	53.89	1.42473737938623	8.52372412472337e-08	6.23500508416393e-06	Msln	mesothelin [Source:MGI Symbol;Acc:MGI:1888992]	-	-	-	-	GO:0005576//extracellular region;GO:0005615//extracellular space;GO:0005794//Golgi apparatus;GO:0005886//plasma membrane;GO:0009986//cell surface;GO:0016020//membrane;GO:0031225//anchored component of membrane	GO:0005515//protein binding	GO:0007155//cell adhesion;GO:0007160//cell-matrix adhesion;GO:0031016//pancreas development
ENSMUSG00000078616	38	76	66	4	11	7	0.89	2.07	1.71	0.12	0.30	0.17	1.55666666666667	0.196666666666667	-2.98463569034782	9.32204979877112e-08	6.78740172154044e-06	Trim30c	tripartite motif-containing 30C [Source:MGI Symbol;Acc:MGI:4821257]	Human Diseases	Infectious disease: viral	ko05170//Human immunodeficiency virus 1 infection	K10648	GO:0005575//cellular_component	GO:0003674//molecular_function;GO:0004842//ubiquitin-protein transferase activity;GO:0005515//protein binding;GO:0008270//zinc ion binding;GO:0046872//metal ion binding	GO:0006914//autophagy;GO:0008150//biological_process;GO:0016567//protein ubiquitination;GO:0045087//innate immune response;GO:0051607//defense response to virus
ENSMUSG00000050578	308	1219	269	25	37	44	4.64	21.34	4.47	0.46	0.65	0.70	10.15	0.603333333333333	-4.07238062571049	9.40787937876224e-08	6.78912829160318e-06	Mmp13	matrix metallopeptidase 13 [Source:MGI Symbol;Acc:MGI:1340026]	Organismal Systems;Organismal Systems;Organismal Systems	Endocrine system;Endocrine system;Immune system	ko04926//Relaxin signaling pathway;ko04928//Parathyroid hormone synthesis, secretion and action;ko04657//IL-17 signaling pathway	K07994;K07994;K07994	GO:0005576//extracellular region;GO:0005615//extracellular space;GO:0005764//lysosome;GO:0005794//Golgi apparatus;GO:0031012//extracellular matrix;GO:0046581//intercellular canaliculus	GO:0001968//fibronectin binding;GO:0004175//endopeptidase activity;GO:0004222//metalloendopeptidase activity;GO:0005509//calcium ion binding;GO:0005518//collagen binding;GO:0008233//peptidase activity;GO:0008237//metallopeptidase activity;GO:0008270//zinc ion binding;GO:0016787//hydrolase activity;GO:0046872//metal ion binding;GO:0048306//calcium-dependent protein binding;GO:0050750//low-density …	GO:0001958//endochondral ossification;GO:0003417//growth plate cartilage development;GO:0006508//proteolysis;GO:0007507//heart development;GO:0009725//response to hormone;GO:0022617//extracellular matrix disassembly;GO:0030198//extracellular matrix organization;GO:0030282//bone mineralization;GO:0030574//collagen catabolic process;GO:0043171//peptide catabolic process;GO:0044267//cellular protein…
ENSMUSG00000056749	295	121	246	67	40	31	5.86	2.78	5.39	1.65	0.92	0.65	4.67666666666667	1.07333333333333	-2.12338241550529	9.41075836185855e-08	6.78912829160318e-06	Nfil3	nuclear factor, interleukin 3, regulated [Source:MGI Symbol;Acc:MGI:109495]	-	-	-	-	GO:0005634//nucleus	GO:0000977//RNA polymerase II regulatory region sequence-specific DNA binding;GO:0000978//RNA polymerase II core promoter proximal region sequence-specific DNA binding;GO:0001227//transcriptional repressor activity, RNA polymerase II transcription regulatory region sequence-specific binding;GO:0003677//DNA binding;GO:0003700//transcription factor activity, sequence-specific DNA binding;GO:0005515…	GO:0000122//negative regulation of transcription from RNA polymerase II promoter;GO:0006351//transcription, DNA-templated;GO:0006355//regulation of transcription, DNA-templated;GO:0006366//transcription from RNA polymerase II promoter;GO:0006955//immune response;GO:0007623//circadian rhythm;GO:0010628//positive regulation of gene expression;GO:0045892//negative regulation of transcription, DNA-te…
ENSMUSG00000045932	1149	2768	2574	716	710	715	12.19	34.01	30.50	9.41	8.86	8.19	25.5666666666667	8.82	-1.53541351611162	9.8190356966184e-08	7.01927156366898e-06	Ifit2	interferon-induced protein with tetratricopeptide repeats 2 [Source:MGI Symbol;Acc:MGI:99449]	-	-	-	-	GO:0005737//cytoplasm;GO:0005783//endoplasmic reticulum	GO:0005515//protein binding	GO:0009615//response to virus;GO:0032091//negative regulation of protein binding;GO:0035457//cellular response to interferon-alpha;GO:0043065//positive regulation of apoptotic process
ENSMUSG00000004207	51056	65508	39449	19502	22806	30904	777.43	1159.45	663.49	366.17	402.38	495.00	866.79	421.183333333333	-1.04123416087914	1.09847146567252e-07	7.78182916244669e-06	Psap	prosaposin [Source:MGI Symbol;Acc:MGI:97783]	Cellular Processes	Transport and catabolism	ko04142//Lysosome	K12382	GO:0005576//extracellular region;GO:0005615//extracellular space;GO:0005737//cytoplasm;GO:0005739//mitochondrion;GO:0005764//lysosome;GO:0005770//late endosome;GO:0016235//aggresome;GO:0032991//macromolecular complex;GO:0043231//intracellular membrane-bounded organelle	GO:0001664//G-protein coupled receptor binding;GO:0002020//protease binding;GO:0004565//beta-galactosidase activity;GO:0005515//protein binding;GO:0005543//phospholipid binding;GO:0030882//lipid antigen binding;GO:0042802//identical protein binding;GO:0042803//protein homodimerization activity	GO:0001865//NK T cell differentiation;GO:0003335//corneocyte development;GO:0006629//lipid metabolic process;GO:0006643//membrane lipid metabolic process;GO:0006664//glycolipid metabolic process;GO:0006665//sphingolipid metabolic process;GO:0006672//ceramide metabolic process;GO:0006678//glucosylceramide metabolic process;GO:0006683//galactosylceramide catabolic process;GO:0006886//intracellular …
ENSMUSG00000049608	193	206	185	60	96	87	2.09	2.59	2.21	0.80	1.20	0.99	2.29666666666667	0.996666666666667	-1.20435849850619	1.18335732942944e-07	8.30833067854325e-06	Gpr55	G protein-coupled receptor 55 [Source:MGI Symbol;Acc:MGI:2685064]	-	-	-	-	GO:0005623//cell;GO:0005886//plasma membrane;GO:0005887//integral component of plasma membrane;GO:0016020//membrane;GO:0016021//integral component of membrane	GO:0004930//G-protein coupled receptor activity;GO:0004949//cannabinoid receptor activity	GO:0007165//signal transduction;GO:0007186//G-protein coupled receptor signaling pathway;GO:0007202//activation of phospholipase C activity;GO:0035025//positive regulation of Rho protein signal transduction;GO:0038171//cannabinoid signaling pathway;GO:0045453//bone resorption;GO:0045671//negative regulation of osteoclast differentiation;GO:0051482//positive regulation of cytosolic calcium ion con…
ENSMUSG00000027996	76	90	64	183	178	179	1.53	2.10	1.42	4.54	4.15	3.79	1.68333333333333	4.16	1.30526264122309	1.22350859647293e-07	8.51421225519018e-06	Sfrp2	secreted frizzled-related protein 2 [Source:MGI Symbol;Acc:MGI:108078]	Environmental Information Processing	Signal transduction	ko04310//Wnt signaling pathway	K02176	GO:0005576//extracellular region;GO:0005615//extracellular space	GO:0005515//protein binding;GO:0008047//enzyme activator activity;GO:0017147//Wnt-protein binding;GO:0048018//receptor agonist activity;GO:0061133//endopeptidase activator activity	GO:0001569//patterning of blood vessels;GO:0001756//somitogenesis;GO:0001843//neural tube closure;GO:0002063//chondrocyte development;GO:0003151//outflow tract morphogenesis;GO:0003214//cardiac left ventricle morphogenesis;GO:0006915//apoptotic process;GO:0007275//multicellular organism development;GO:0007584//response to nutrient;GO:0008284//positive regulation of cell proliferation;GO:0008285//…
ENSMUSG00000039997	2060	4193	3256	1327	1039	1271	27.97	68.49	50.45	22.85	17.00	18.70	48.97	19.5166666666667	-1.32719152604134	1.45230756607309e-07	9.97399174307049e-06	Ifi203	interferon activated gene 203 [Source:MGI Symbol;Acc:MGI:96428]	Organismal Systems	Immune system	ko04621//NOD-like receptor signaling pathway	K20914	-	-	GO:0002218//activation of innate immune response;GO:0035458//cellular response to interferon-beta
ENSMUSG00000037681	188	144	222	335	338	504	1.69	1.50	2.20	3.71	3.52	4.76	1.79666666666667	3.99666666666667	1.15347448066172	1.59643978699681e-07	1.07981399106636e-05	Esyt3	extended synaptotagmin-like protein 3 [Source:MGI Symbol;Acc:MGI:1098699]	-	-	-	-	GO:0005783//endoplasmic reticulum;GO:0005789//endoplasmic reticulum membrane;GO:0005886//plasma membrane;GO:0005887//integral component of plasma membrane;GO:0016020//membrane;GO:0016021//integral component of membrane;GO:0031227//intrinsic component of endoplasmic reticulum membrane;GO:0031234//extrinsic component of cytoplasmic side of plasma membrane;GO:0044232//organelle membrane contact site	GO:0005509//calcium ion binding;GO:0005544//calcium-dependent phospholipid binding;GO:0008289//lipid binding;GO:0008429//phosphatidylethanolamine binding;GO:0031210//phosphatidylcholine binding;GO:0035091//phosphatidylinositol binding;GO:0046872//metal ion binding	GO:0006869//lipid transport;GO:0008150//biological_process
ENSMUSG00000025473	1978	2379	1160	553	666	923	28.69	37.28	16.62	8.85	10.02	12.59	27.53	10.4866666666667	-1.39244843990103	1.59977529038254e-07	1.07981399106636e-05	Adam8	a disintegrin and metallopeptidase domain 8 [Source:MGI Symbol;Acc:MGI:107825]	-	-	-	-	GO:0002102//podosome;GO:0005737//cytoplasm;GO:0005886//plasma membrane;GO:0005887//integral component of plasma membrane;GO:0009986//cell surface;GO:0016020//membrane;GO:0016021//integral component of membrane;GO:0032010//phagolysosome;GO:0032127//dense core granule membrane;GO:0042581//specific granule;GO:0070820//tertiary granule;GO:0071065//alpha9-beta1 integrin-vascular cell adhesion molecule…	GO:0004222//metalloendopeptidase activity;GO:0005178//integrin binding;GO:0005509//calcium ion binding;GO:0005515//protein binding;GO:0008233//peptidase activity;GO:0008237//metallopeptidase activity;GO:0008270//zinc ion binding;GO:0016787//hydrolase activity;GO:0046872//metal ion binding;GO:0050839//cell adhesion molecule binding	GO:0000902//cell morphogenesis;GO:0001525//angiogenesis;GO:0002523//leukocyte migration involved in inflammatory response;GO:0002675//positive regulation of acute inflammatory response;GO:0002693//positive regulation of cellular extravasation;GO:0006508//proteolysis;GO:0006954//inflammatory response;GO:0007160//cell-matrix adhesion;GO:0022407//regulation of cell-cell adhesion;GO:0033089//positive…
ENSMUSG00000104713	359	909	1052	170	256	185	5.02	14.33	15.65	2.88	4.29	2.63	11.6666666666667	3.26666666666667	-1.83650126771712	1.62700347800898e-07	1.09349930336099e-05	Gbp6	guanylate binding protein 6 [Source:MGI Symbol;Acc:MGI:2140937]	-	-	-	-	GO:0016020//membrane;GO:0020005//symbiont-containing vacuole membrane;GO:0031410//cytoplasmic vesicle	GO:0000166//nucleotide binding;GO:0003924//GTPase activity;GO:0005525//GTP binding	GO:0009617//response to bacterium;GO:0035458//cellular response to interferon-beta;GO:0042832//defense response to protozoan;GO:0044406//adhesion of symbiont to host;GO:0050830//defense response to Gram-positive bacterium;GO:0071222//cellular response to lipopolysaccharide;GO:0071346//cellular response to interferon-gamma
ENSMUSG00000028268	1024	2270	2509	520	621	796	20.80	45.69	45.54	13.75	14.53	16.51	37.3433333333333	14.93	-1.32263654540269	1.72229863378192e-07	1.14773689040205e-05	Gbp3	guanylate binding protein 3 [Source:MGI Symbol;Acc:MGI:1926263]	Organismal Systems	Immune system	ko04621//NOD-like receptor signaling pathway	K20899	GO:0000139//Golgi membrane;GO:0005634//nucleus;GO:0005737//cytoplasm;GO:0005794//Golgi apparatus;GO:0005829//cytosol;GO:0005886//plasma membrane;GO:0016020//membrane;GO:0020005//symbiont-containing vacuole membrane;GO:0031410//cytoplasmic vesicle;GO:0048471//perinuclear region of cytoplasm	GO:0000166//nucleotide binding;GO:0003924//GTPase activity;GO:0005525//GTP binding;GO:0016787//hydrolase activity;GO:0042803//protein homodimerization activity	GO:0035458//cellular response to interferon-beta;GO:0042832//defense response to protozoan;GO:0044406//adhesion of symbiont to host;GO:0050830//defense response to Gram-positive bacterium;GO:0071346//cellular response to interferon-gamma
ENSMUSG00000035352	71	134	130	19	33	22	5.45	11.73	10.81	1.77	2.88	1.74	9.33	2.13	-2.13102365062592	1.76318438488473e-07	1.17002535110051e-05	Ccl12	chemokine (C-C motif) ligand 12 [Source:MGI Symbol;Acc:MGI:108224]	Human Diseases;Environmental Information Processing;Human Diseases;Organismal Systems;Human Diseases;Organismal Systems;Human Diseases;Human Diseases;Human Diseases;Environmental Information Processing;Human Diseases;Human Diseases;Organismal Systems;Environmental Information Processing;Human Diseases	Infectious diseases;Signaling molecules and interaction;Infectious diseases;Immune system;Immune diseases;Immune system;Infectious diseases;Cardiovascular diseases;Infectious disease: bacterial;Signal transduction;Infectious diseases;Endocrine and metabolic diseases;Immune system;Signaling molecules and interaction;Infectious diseases	ko05168//Herpes simplex infection;ko04060//Cytokine-cytokine receptor interaction;ko05163//Human cytomegalovirus infection;ko04621//NOD-like receptor signaling pathway;ko05323//Rheumatoid arthritis;ko04062//Chemokine signaling pathway;ko05164//Influenza A;ko05418//Fluid shear stress and atherosclerosis;ko05135//Yersinia infection;ko04668//TNF signaling pathway;ko05142//Chagas disease (American tr…	K14624;K14624;K14624;K14624;K14624;K14624;K14624;K14624;K14624;K14624;K14624;K14624;K14624;K14624;K14624	GO:0005576//extracellular region;GO:0005615//extracellular space	GO:0005125//cytokine activity;GO:0008009//chemokine activity;GO:0031727//CCR2 chemokine receptor binding;GO:0048020//CCR chemokine receptor binding	GO:0000165//MAPK cascade;GO:0001525//angiogenesis;GO:0002548//monocyte chemotaxis;GO:0002687//positive regulation of leukocyte migration;GO:0006935//chemotaxis;GO:0006954//inflammatory response;GO:0006955//immune response;GO:0007010//cytoskeleton organization;GO:0007165//signal transduction;GO:0007186//G-protein coupled receptor signaling pathway;GO:0008360//regulation of cell shape;GO:0019221//c…
ENSMUSG00000046879	1983	3981	3949	897	1376	1419	37.55	87.17	82.43	20.83	30.12	28.29	69.05	26.4133333333333	-1.38637503497708	1.77417639846147e-07	1.17237278229426e-05	Irgm1	immunity-related GTPase family M member 1 [Source:MGI Symbol;Acc:MGI:107567]	Human Diseases	Infectious diseases	ko05145//Toxoplasmosis	K14139	GO:0000139//Golgi membrane;GO:0000421//autophagosome membrane;GO:0001891//phagocytic cup;GO:0005764//lysosome;GO:0005765//lysosomal membrane;GO:0005768//endosome;GO:0005770//late endosome;GO:0005776//autophagosome;GO:0005783//endoplasmic reticulum;GO:0005789//endoplasmic reticulum membrane;GO:0005794//Golgi apparatus;GO:0005886//plasma membrane;GO:0016020//membrane;GO:0030670//phagocytic vesicle …	GO:0000166//nucleotide binding;GO:0003924//GTPase activity;GO:0005525//GTP binding;GO:0016787//hydrolase activity	GO:0000045//autophagosome assembly;GO:0002376//immune system process;GO:0006914//autophagy;GO:0006952//defense response;GO:0009617//response to bacterium;GO:0035458//cellular response to interferon-beta;GO:0045087//innate immune response;GO:0060335//positive regulation of interferon-gamma-mediated signaling pathway;GO:0071346//cellular response to interferon-gamma;GO:0075044//autophagy of host ce…
ENSMUSG00000022303	57	147	87	15	11	22	1.28	3.57	2.42	0.44	0.26	0.47	2.42333333333333	0.39	-2.63544683433619	1.8152933559599e-07	1.19452379117914e-05	Dcstamp	dendrocyte expressed seven transmembrane protein [Source:MGI Symbol;Acc:MGI:1923016]	-	-	-	-	GO:0005768//endosome;GO:0005783//endoplasmic reticulum;GO:0005789//endoplasmic reticulum membrane;GO:0005886//plasma membrane;GO:0009986//cell surface;GO:0010008//endosome membrane;GO:0016020//membrane;GO:0016021//integral component of membrane;GO:0030176//integral component of endoplasmic reticulum membrane;GO:0033116//endoplasmic reticulum-Golgi intermediate compartment membrane	-	GO:0002376//immune system process;GO:0030154//cell differentiation;GO:0030308//negative regulation of cell growth;GO:0030316//osteoclast differentiation;GO:0034241//positive regulation of macrophage fusion;GO:0036006//cellular response to macrophage colony-stimulating factor stimulus;GO:0043011//myeloid dendritic cell differentiation;GO:0045657//positive regulation of monocyte differentiation;GO:…
ENSMUSG00000095351	125	343	132	27	38	50	13.32	42.46	15.53	3.55	4.69	5.60	23.77	4.61333333333333	-2.36526046102687	1.88677162159556e-07	1.23638572053473e-05	Igkv3-2	immunoglobulin kappa variable 3-2 [Source:MGI Symbol;Acc:MGI:1330850]	-	-	-	-	GO:0005615//extracellular space	-	GO:0002377//immunoglobulin production;GO:0006955//immune response
ENSMUSG00000026390	12	14	4	69	45	79	0.25	0.34	0.09	2.14	1.09	1.74	0.226666666666667	1.65666666666667	2.86963920031195	1.91198437412648e-07	1.24770864115714e-05	Marco	macrophage receptor with collagenous structure [Source:MGI Symbol;Acc:MGI:1309998]	Cellular Processes	Transport and catabolism	ko04145//Phagosome	K13884	GO:0005581//collagen trimer;GO:0005592//collagen type XI trimer;GO:0005737//cytoplasm;GO:0005886//plasma membrane;GO:0016020//membrane;GO:0016021//integral component of membrane	GO:0001540//beta-amyloid binding;GO:0001664//G-protein coupled receptor binding;GO:0005044//scavenger receptor activity;GO:0038024//cargo receptor activity	GO:0001934//positive regulation of protein phosphorylation;GO:0002376//immune system process;GO:0006897//endocytosis;GO:0006898//receptor-mediated endocytosis;GO:0006911//phagocytosis, engulfment;GO:0007193//adenylate cyclase-inhibiting G-protein coupled receptor signaling pathway;GO:0043277//apoptotic cell clearance;GO:0045087//innate immune response;GO:0070374//positive regulation of ERK1 and E…
ENSMUSG00000094796	131	263	221	42	55	77	3.73	9.63	6.16	1.31	1.81	2.24	6.50666666666667	1.78666666666667	-1.86464814710511	2.00911019558868e-07	1.29678162484528e-05	BC147527	cDNA sequence BC147527 [Source:MGI Symbol;Acc:MGI:4840510]	-	-	-	-	-	-	-
ENSMUSG00000035403	52	40	27	99	115	189	0.33	0.29	0.19	0.77	1.02	1.26	0.27	1.01666666666667	1.91281542956563	2.44365202471204e-07	1.54964981421961e-05	Crb2	crumbs family member 2 [Source:MGI Symbol;Acc:MGI:2679260]	Environmental Information Processing;Environmental Information Processing	Signal transduction;Signal transduction	ko04390//Hippo signaling pathway;ko04391//Hippo signaling pathway -fly	K16681;K16681	GO:0005886//plasma membrane;GO:0016020//membrane;GO:0016021//integral component of membrane;GO:0016324//apical plasma membrane;GO:0032991//macromolecular complex	GO:0005509//calcium ion binding;GO:0005515//protein binding;GO:0019828//aspartic-type endopeptidase inhibitor activity;GO:0044877//macromolecular complex binding	GO:0001707//mesoderm formation;GO:0001756//somitogenesis;GO:0007157//heterophilic cell-cell adhesion via plasma membrane cell adhesion molecules;GO:0007275//multicellular organism development;GO:0007369//gastrulation;GO:0010470//regulation of gastrulation;GO:0010718//positive regulation of epithelial to mesenchymal transition;GO:0010951//negative regulation of endopeptidase activity;GO:0014028//n…
ENSMUSG00000002565	201	269	201	26	71	84	2.70	4.20	2.98	0.43	1.11	1.19	3.29333333333333	0.91	-1.85561009066482	2.72029621932058e-07	1.70446608132489e-05	Scin	scinderin [Source:MGI Symbol;Acc:MGI:1306794]	Human Diseases;Cellular Processes;Organismal Systems	Cancers;Cell motility;Immune system	ko05203//Viral carcinogenesis;ko04810//Regulation of actin cytoskeleton;ko04666//Fc gamma R-mediated phagocytosis	K05768;K05768;K05768	GO:0002102//podosome;GO:0005623//cell;GO:0005737//cytoplasm;GO:0005856//cytoskeleton;GO:0005886//plasma membrane;GO:0005903//brush border;GO:0030054//cell junction;GO:0032991//macromolecular complex;GO:0042995//cell projection	GO:0003779//actin binding;GO:0005509//calcium ion binding;GO:0046872//metal ion binding;GO:0051015//actin filament binding	GO:0008285//negative regulation of cell proliferation;GO:0032330//regulation of chondrocyte differentiation;GO:0042989//sequestering of actin monomers;GO:0043065//positive regulation of apoptotic process;GO:0045654//positive regulation of megakaryocyte differentiation;GO:0051014//actin filament severing;GO:0051127//positive regulation of actin nucleation;GO:0051693//actin filament capping
ENSMUSG00000027073	74	58	97	21	17	16	3.56	3.24	5.15	1.24	0.95	0.81	3.98333333333333	1	-1.99397621237223	2.76418030044623e-07	1.71827128794933e-05	Prg2	proteoglycan 2, bone marrow [Source:MGI Symbol;Acc:MGI:103294]	Human Diseases	Immune diseases	ko05310//Asthma	K10786	-	GO:0030021//extracellular matrix structural constituent conferring compression resistance;GO:0030246//carbohydrate binding	GO:0002215//defense response to nematode;GO:0002376//immune system process;GO:0006955//immune response;GO:0032693//negative regulation of interleukin-10 production;GO:0032753//positive regulation of interleukin-4 production;GO:0042742//defense response to bacterium
ENSMUSG00000017830	353	949	1013	206	224	229	6.11	20.12	21.89	4.55	4.73	4.43	16.04	4.57	-1.81140807139685	2.95656578313964e-07	1.82344745378185e-05	Dhx58	DEXH (Asp-Glu-X-His) box polypeptide 58 [Source:MGI Symbol;Acc:MGI:1931560]	Organismal Systems	Immune system	ko04622//RIG-I-like receptor signaling pathway	K12649	GO:0005737//cytoplasm	GO:0000166//nucleotide binding;GO:0003677//DNA binding;GO:0003723//RNA binding;GO:0003724//RNA helicase activity;GO:0003725//double-stranded RNA binding;GO:0003727//single-stranded RNA binding;GO:0004386//helicase activity;GO:0005524//ATP binding;GO:0008270//zinc ion binding;GO:0016787//hydrolase activity;GO:0046872//metal ion binding	GO:0002376//immune system process;GO:0009615//response to virus;GO:0009617//response to bacterium;GO:0032480//negative regulation of type I interferon production;GO:0032481//positive regulation of type I interferon production;GO:0039534//negative regulation of MDA-5 signaling pathway;GO:0039536//negative regulation of RIG-I signaling pathway;GO:0045087//innate immune response;GO:0045088//regulati…
ENSMUSG00000037211	167	147	238	363	380	385	2.65	2.67	4.12	7.08	6.79	6.30	3.14666666666667	6.72333333333333	1.09535231925112	3.23439959025514e-07	1.96399236895531e-05	Spry1	sprouty RTK signaling antagonist 1 [Source:MGI Symbol;Acc:MGI:1345139]	-	-	-	-	GO:0005623//cell;GO:0005654//nucleoplasm;GO:0005737//cytoplasm;GO:0005794//Golgi apparatus;GO:0005829//cytosol;GO:0016020//membrane	GO:0005515//protein binding	GO:0000132//establishment of mitotic spindle orientation;GO:0001656//metanephros development;GO:0001657//ureteric bud development;GO:0001759//organ induction;GO:0007275//multicellular organism development;GO:0008285//negative regulation of cell proliferation;GO:0009966//regulation of signal transduction;GO:0034260//negative regulation of GTPase activity;GO:0040037//negative regulation of fibrobla…
ENSMUSG00000022769	716	855	662	236	388	421	26.02	36.11	26.57	10.58	16.35	16.10	29.5666666666667	14.3433333333333	-1.04359126424012	3.3200708941388e-07	2.00056532383605e-05	Sdf2l1	stromal cell-derived factor 2-like 1 [Source:MGI Symbol;Acc:MGI:2149842]	-	-	-	-	GO:0005783//endoplasmic reticulum;GO:0005788//endoplasmic reticulum lumen;GO:0005789//endoplasmic reticulum membrane;GO:0016020//membrane;GO:0034663//endoplasmic reticulum chaperone complex	GO:0004169//dolichyl-phosphate-mannose-protein mannosyltransferase activity;GO:0051087//chaperone binding;GO:0051117//ATPase binding;GO:0051787//misfolded protein binding	GO:0034976//response to endoplasmic reticulum stress;GO:0035269//protein O-linked mannosylation;GO:0042981//regulation of apoptotic process;GO:0071218//cellular response to misfolded protein;GO:0071712//ER-associated misfolded protein catabolic process
ENSMUSG00000079419	1005	921	1239	336	352	676	21.98	23.41	29.92	9.07	8.93	15.56	25.1033333333333	11.1866666666667	-1.16609872936553	3.58462799046846e-07	2.14355301924325e-05	Ms4a6c	membrane-spanning 4-domains, subfamily A, member 6C [Source:MGI Symbol;Acc:MGI:2385644]	-	-	-	-	GO:0016020//membrane;GO:0016021//integral component of membrane	-	-
ENSMUSG00000029553	219	223	198	97	74	114	5.01	6.31	5.10	3.08	2.02	2.94	5.47333333333333	2.68	-1.03018672059888	4.25218297502955e-07	2.48602534008512e-05	Tfec	transcription factor EC [Source:MGI Symbol;Acc:MGI:1333760]	-	-	-	-	GO:0005634//nucleus;GO:0005654//nucleoplasm	GO:0000978//RNA polymerase II core promoter proximal region sequence-specific DNA binding;GO:0001228//transcriptional activator activity, RNA polymerase II transcription regulatory region sequence-specific binding;GO:0003677//DNA binding;GO:0046983//protein dimerization activity	GO:0006355//regulation of transcription, DNA-templated;GO:0034605//cellular response to heat;GO:0045944//positive regulation of transcription from RNA polymerase II promoter
ENSMUSG00000069874	1921	3199	3241	782	1192	1499	22.20	42.98	41.40	11.15	16.00	18.23	35.5266666666667	15.1266666666667	-1.2318082240877	4.58420650578263e-07	2.65058146016336e-05	Irgm2	immunity-related GTPase family M member 2 [Source:MGI Symbol;Acc:MGI:1926262]	Human Diseases	Infectious diseases	ko05145//Toxoplasmosis	K14139	GO:0000139//Golgi membrane;GO:0005739//mitochondrion;GO:0005789//endoplasmic reticulum membrane;GO:0005794//Golgi apparatus;GO:0005829//cytosol;GO:0016020//membrane;GO:0020003//symbiont-containing vacuole	GO:0003924//GTPase activity;GO:0005525//GTP binding;GO:0019901//protein kinase binding;GO:0043539//protein serine/threonine kinase activator activity;GO:0050700//CARD domain binding;GO:0051434//BH3 domain binding	GO:0000045//autophagosome assembly;GO:0001934//positive regulation of protein phosphorylation;GO:0006952//defense response;GO:0009617//response to bacterium;GO:0010508//positive regulation of autophagy;GO:0010800//positive regulation of peptidyl-threonine phosphorylation;GO:0031648//protein destabilization;GO:0033138//positive regulation of peptidyl-serine phosphorylation;GO:0034341//response to …
ENSMUSG00000016498	93	194	103	25	37	31	2.26	5.47	2.76	0.75	1.05	0.78	3.49666666666667	0.86	-2.02357170715401	4.71232924457189e-07	2.71468139301766e-05	Pdcd1lg2	programmed cell death 1 ligand 2 [Source:MGI Symbol;Acc:MGI:1930125]	Environmental Information Processing	Signaling molecules and interaction	ko04514//Cell adhesion molecules (CAMs)	K06708	GO:0005886//plasma membrane;GO:0009897//external side of plasma membrane;GO:0009986//cell surface;GO:0016020//membrane;GO:0016021//integral component of membrane	GO:0005515//protein binding	GO:0002250//adaptive immune response;GO:0002376//immune system process;GO:0006955//immune response;GO:0007165//signal transduction;GO:0007166//cell surface receptor signaling pathway;GO:0031295//T cell costimulation;GO:0032689//negative regulation of interferon-gamma production;GO:0032693//negative regulation of interleukin-10 production;GO:0042102//positive regulation of T cell proliferation;GO:…
ENSMUSG00000078771	478	667	507	204	263	313	13.81	20.90	15.26	6.62	8.90	9.15	16.6566666666667	8.22333333333333	-1.01830450243577	4.75974806948031e-07	2.73199116382178e-05	Evi2a	ecotropic viral integration site 2a [Source:MGI Symbol;Acc:MGI:95458]	-	-	-	-	GO:0016020//membrane;GO:0016021//integral component of membrane	-	-
ENSMUSG00000060311	27	72	82	5	8	1	1.43	4.44	4.81	0.35	0.49	0.06	3.56	0.3	-3.56884283535788	5.34774649749788e-07	3.04724670891845e-05	Mucl1	mucin-like 1 [Source:MGI Symbol;Acc:MGI:98393]	-	-	-	-	GO:0005575//cellular_component	GO:0003674//molecular_function	GO:0008150//biological_process
ENSMUSG00000079339	134	235	233	72	46	65	2.45	5.00	4.71	1.63	0.98	1.26	4.05333333333333	1.29	-1.65173775729917	5.52898319622827e-07	3.13914508040007e-05	Ifit1bl1	interferon induced protein with tetratricpeptide repeats 1B like 1 [Source:MGI Symbol;Acc:MGI:3650685]	Human Diseases	Infectious diseases	ko05160//Hepatitis C	K14217	GO:0005737//cytoplasm;GO:0005829//cytosol	GO:0003723//RNA binding;GO:0005515//protein binding	GO:0009615//response to virus;GO:0050688//regulation of defense response to virus;GO:0051607//defense response to virus;GO:0071357//cellular response to type I interferon;GO:0071360//cellular response to exogenous dsRNA
ENSMUSG00000053835	1675	2785	2963	1047	1201	1075	31.01	59.85	60.79	23.95	25.81	20.94	50.55	23.5666666666667	-1.10096337781477	5.99670650431532e-07	3.38029402126764e-05	H2-T24	histocompatibility 2, T region locus 24 [Source:MGI Symbol;Acc:MGI:95958]	Human Diseases;Human Diseases;Human Diseases;Cellular Processes;Cellular Processes;Human Diseases;Human Diseases;Human Diseases;Human Diseases;Human Diseases;Human Diseases;Human Diseases;Human Diseases;Cellular Processes;Environmental Information Processing;Organismal Systems;Human Diseases;Human Diseases	Infectious diseases;Infectious diseases;Infectious diseases;Transport and catabolism;Transport and catabolism;Infectious diseases;Infectious disease: viral;Infectious diseases;Cancers;Infectious diseases;Cardiovascular diseases;Immune diseases;Immune diseases;Cell growth and death;Signaling molecules and interaction;Immune system;Endocrine and metabolic diseases;Immune diseases	ko05168//Herpes simplex infection;ko05169//Epstein-Barr virus infection;ko05165//Human papillomavirus infection;ko04145//Phagosome;ko04144//Endocytosis;ko05163//Human cytomegalovirus infection;ko05170//Human immunodeficiency virus 1 infection;ko05166//HTLV-I infection;ko05203//Viral carcinogenesis;ko05167//Kaposi sarcoma-associated herpesvirus infection;ko05416//Viral myocarditis;ko05320//Autoimm…	K06751;K06751;K06751;K06751;K06751;K06751;K06751;K06751;K06751;K06751;K06751;K06751;K06751;K06751;K06751;K06751;K06751;K06751	GO:0005615//extracellular space;GO:0009897//external side of plasma membrane;GO:0016020//membrane;GO:0016021//integral component of membrane	-	GO:0001916//positive regulation of T cell mediated cytotoxicity;GO:0002476//antigen processing and presentation of endogenous peptide antigen via MHC class Ib
ENSMUSG00000045868	31	11	32	0	0	0	0.14	0.06	0.16	0.00	0.00	0.00	0.12	0.001	-6.90689059560852	6.38233730621563e-07	3.54682045282167e-05	Gvin1	GTPase, very large interferon inducible 1 [Source:MGI Symbol;Acc:MGI:1921808]	-	-	-	-	-	GO:0005525//GTP binding	-
ENSMUSG00000071552	111	57	78	20	24	18	4.86	2.90	3.77	1.08	1.22	0.83	3.84333333333333	1.04333333333333	-1.88115795071916	6.72793555877839e-07	3.72571276524323e-05	Tigit	T cell immunoreceptor with Ig and ITIM domains [Source:MGI Symbol;Acc:MGI:3642260]	Environmental Information Processing	Signaling molecules and interaction	ko04514//Cell adhesion molecules (CAMs)	K16350	GO:0009986//cell surface;GO:0016020//membrane;GO:0016021//integral component of membrane	GO:0005102//receptor binding;GO:0042802//identical protein binding	GO:0032695//negative regulation of interleukin-12 production;GO:0032733//positive regulation of interleukin-10 production;GO:0050868//negative regulation of T cell activation
ENSMUSG00000040483	370	775	717	216	243	210	14.64	37.62	35.57	11.02	10.42	10.65	29.2766666666667	10.6966666666667	-1.45259001413508	7.5105057658482e-07	4.06343638150832e-05	Xaf1	XIAP associated factor 1 [Source:MGI Symbol;Acc:MGI:3772572]	-	-	-	-	GO:0005634//nucleus;GO:0005654//nucleoplasm;GO:0005737//cytoplasm;GO:0005739//mitochondrion	GO:0046872//metal ion binding	GO:0006915//apoptotic process;GO:0031333//negative regulation of protein complex assembly;GO:0035456//response to interferon-beta
ENSMUSG00000034422	5046	9470	8766	3209	3685	3429	27.40	59.74	52.55	21.49	23.20	19.59	46.5633333333333	21.4266666666667	-1.11978691198473	7.58116831366769e-07	4.0831860982552e-05	Parp14	poly (ADP-ribose) polymerase family, member 14 [Source:MGI Symbol;Acc:MGI:1919489]	-	-	-	-	GO:0005634//nucleus;GO:0005737//cytoplasm;GO:0005829//cytosol;GO:0005886//plasma membrane	GO:0003950//NAD+ ADP-ribosyltransferase activity;GO:0005515//protein binding;GO:0016740//transferase activity;GO:0016757//transferase activity, transferring glycosyl groups;GO:0019899//enzyme binding;GO:0070403//NAD+ binding;GO:1990404//protein ADP-ribosylase activity	GO:0002376//immune system process;GO:0006471//protein ADP-ribosylation;GO:0010629//negative regulation of gene expression;GO:0042531//positive regulation of tyrosine phosphorylation of STAT protein;GO:0042532//negative regulation of tyrosine phosphorylation of STAT protein;GO:0045087//innate immune response;GO:0060336//negative regulation of interferon-gamma-mediated signaling pathway;GO:0070212/…
ENSMUSG00000078853	1642	2727	3076	617	1113	1201	33.49	64.08	68.84	15.52	26.39	26.08	55.47	22.6633333333333	-1.29134765645848	7.68727023406486e-07	4.12620133007297e-05	Igtp	interferon gamma induced GTPase [Source:MGI Symbol;Acc:MGI:107729]	Human Diseases	Infectious diseases	ko05145//Toxoplasmosis	K14140	GO:0005789//endoplasmic reticulum membrane;GO:0005829//cytosol;GO:0016020//membrane	GO:0003924//GTPase activity;GO:0005525//GTP binding	GO:0006952//defense response;GO:0035458//cellular response to interferon-beta
ENSMUSG00000025105	99	73	91	148	198	299	0.85	0.73	0.86	1.57	1.98	2.71	0.813333333333333	2.08666666666667	1.35928150936974	8.37547992271587e-07	4.42017358203196e-05	Bnc1	basonuclin 1 [Source:MGI Symbol;Acc:MGI:1097164]	-	-	-	-	GO:0005654//nucleoplasm;GO:0043231//intracellular membrane-bounded organelle	GO:0003676//nucleic acid binding	-
ENSMUSG00000079227	155	265	220	79	56	85	0.76	1.51	1.29	0.48	0.31	0.44	1.18666666666667	0.41	-1.53321892562716	8.66168448225478e-07	4.55593016228832e-05	Ccr5	chemokine (C-C motif) receptor 5 [Source:MGI Symbol;Acc:MGI:107182]	Environmental Information Processing;Cellular Processes;Human Diseases;Human Diseases;Human Diseases;Human Diseases;Organismal Systems;Human Diseases;Environmental Information Processing	Signaling molecules and interaction;Transport and catabolism;Infectious diseases;Infectious disease: viral;Cancers;Infectious diseases;Immune system;Infectious diseases;Signaling molecules and interaction	ko04060//Cytokine-cytokine receptor interaction;ko04144//Endocytosis;ko05163//Human cytomegalovirus infection;ko05170//Human immunodeficiency virus 1 infection;ko05203//Viral carcinogenesis;ko05167//Kaposi sarcoma-associated herpesvirus infection;ko04062//Chemokine signaling pathway;ko05145//Toxoplasmosis;ko04061//Viral protein interaction with cytokine and cytokine receptor	K04180;K04180;K04180;K04180;K04180;K04180;K04180;K04180;K04180	GO:0005623//cell;GO:0005737//cytoplasm;GO:0005768//endosome;GO:0005886//plasma membrane;GO:0009897//external side of plasma membrane;GO:0009986//cell surface;GO:0016020//membrane;GO:0016021//integral component of membrane	GO:0003779//actin binding;GO:0004930//G-protein coupled receptor activity;GO:0004950//chemokine receptor activity;GO:0016493//C-C chemokine receptor activity;GO:0019901//protein kinase binding;GO:0019956//chemokine binding;GO:0019957//C-C chemokine binding;GO:0042802//identical protein binding;GO:0071791//chemokine (C-C motif) ligand 5 binding	GO:0000165//MAPK cascade;GO:0006816//calcium ion transport;GO:0006935//chemotaxis;GO:0006952//defense response;GO:0006954//inflammatory response;GO:0006955//immune response;GO:0007165//signal transduction;GO:0007186//G-protein coupled receptor signaling pathway;GO:0007204//positive regulation of cytosolic calcium ion concentration;GO:0007267//cell-cell signaling;GO:0010628//positive regulation of…
ENSMUSG00000078920	1864	3288	3656	990	1213	1535	44.47	90.91	97.00	29.19	34.54	38.43	77.46	34.0533333333333	-1.18565547704678	8.94517589490446e-07	4.67378010960673e-05	Ifi47	interferon gamma inducible protein 47 [Source:MGI Symbol;Acc:MGI:99448]	Environmental Information Processing	Signal transduction	ko04668//TNF signaling pathway	K17072	GO:0005783//endoplasmic reticulum;GO:0005789//endoplasmic reticulum membrane;GO:0016020//membrane	GO:0003924//GTPase activity;GO:0005525//GTP binding	GO:0006952//defense response;GO:0035458//cellular response to interferon-beta
ENSMUSG00000096606	86	64	69	129	165	251	1.15	0.99	1.02	2.12	2.55	3.52	1.05333333333333	2.73	1.37393889346391	9.17907823631756e-07	4.74454964592474e-05	Tpbgl	trophoblast glycoprotein-like [Source:MGI Symbol;Acc:MGI:3646425]	-	-	-	-	GO:0016020//membrane;GO:0016021//integral component of membrane	GO:0005515//protein binding	-
ENSMUSG00000031443	895	1032	615	397	369	446	19.39	25.98	14.71	10.61	9.27	10.16	20.0266666666667	10.0133333333333	-1.00000000000001	9.47667609639829e-07	4.83895081065116e-05	F7	coagulation factor VII [Source:MGI Symbol;Acc:MGI:109325]	Organismal Systems	Immune system	ko04610//Complement and coagulation cascades	K01320	GO:0005576//extracellular region;GO:0005615//extracellular space;GO:0031982//vesicle	GO:0004175//endopeptidase activity;GO:0004252//serine-type endopeptidase activity;GO:0005102//receptor binding;GO:0005509//calcium ion binding;GO:0008233//peptidase activity;GO:0008236//serine-type peptidase activity;GO:0016787//hydrolase activity	GO:0001666//response to hypoxia;GO:0002690//positive regulation of leukocyte chemotaxis;GO:0006508//proteolysis;GO:0007596//blood coagulation;GO:0007599//hemostasis;GO:0007623//circadian rhythm;GO:0009725//response to hormone;GO:0010037//response to carbon dioxide;GO:0010641//positive regulation of platelet-derived growth factor receptor signaling pathway;GO:0014070//response to organic cyclic co…
ENSMUSG00000049734	383	617	591	204	254	249	14.60	27.35	24.88	9.57	11.16	9.96	22.2766666666667	10.23	-1.12272722838268	9.97833275606332e-07	5.05441012472408e-05	Trex1	three prime repair exonuclease 1 [Source:MGI Symbol;Acc:MGI:1328317]	Organismal Systems	Immune system	ko04623//Cytosolic DNA-sensing pathway	K10790	GO:0005634//nucleus;GO:0005737//cytoplasm;GO:0005783//endoplasmic reticulum;GO:0005789//endoplasmic reticulum membrane;GO:0005829//cytosol;GO:0008250//oligosaccharyltransferase complex;GO:0016020//membrane;GO:0032993//protein-DNA complex;GO:0043596//nuclear replication fork	GO:0000287//magnesium ion binding;GO:0003676//nucleic acid binding;GO:0003677//DNA binding;GO:0003690//double-stranded DNA binding;GO:0003697//single-stranded DNA binding;GO:0004518//nuclease activity;GO:0004527//exonuclease activity;GO:0005515//protein binding;GO:0008296//3'-5'-exodeoxyribonuclease activity;GO:0008301//DNA binding, bending;GO:0008408//3'-5' exonuclease activity;GO:0008853//exode…	GO:0001568//blood vessel development;GO:0001822//kidney development;GO:0002250//adaptive immune response;GO:0002251//organ or tissue specific immune response;GO:0002253//activation of immune response;GO:0002281//macrophage activation involved in immune response;GO:0002320//lymphoid progenitor cell differentiation;GO:0002379//immunoglobulin biosynthetic process involved in immune response;GO:00023…
ENSMUSG00000049985	124	225	92	37	31	41	2.63	6.58	1.77	0.79	0.58	0.69	3.66	0.686666666666667	-2.41416181182198	9.99505022438601e-07	5.05441012472408e-05	Ankrd55	ankyrin repeat domain 55 [Source:MGI Symbol;Acc:MGI:1924568]	-	-	-	-	GO:0005575//cellular_component	GO:0003674//molecular_function;GO:0005515//protein binding	GO:0008150//biological_process
ENSMUSG00000050335	6491	8939	4288	2251	2479	3608	236.51	377.16	172.11	101.28	105.71	139.73	261.926666666667	115.573333333333	-1.18035438964432	1.08716297554772e-06	5.42787686236157e-05	Lgals3	lectin, galactose binding, soluble 3 [Source:MGI Symbol;Acc:MGI:96778]	-	-	-	-	GO:0001772//immunological synapse;GO:0005634//nucleus;GO:0005737//cytoplasm;GO:0005743//mitochondrial inner membrane	GO:0019863//IgE binding;GO:0019903//protein phosphatase binding;GO:0030246//carbohydrate binding;GO:0042056//chemoattractant activity;GO:0043236//laminin binding	GO:0002548//monocyte chemotaxis;GO:0030593//neutrophil chemotaxis;GO:0030855//epithelial cell differentiation;GO:0031334//positive regulation of protein complex assembly;GO:0042129//regulation of T cell proliferation;GO:0045806//negative regulation of endocytosis;GO:0048245//eosinophil chemotaxis;GO:0048246//macrophage chemotaxis;GO:0050918//positive chemotaxis;GO:0070232//regulation of T cell ap…
ENSMUSG00000028037	992	3955	3738	335	403	303	13.73	65.55	57.42	5.88	6.46	4.41	45.5666666666667	5.58333333333333	-3.02878024226093	1.1673858656102e-06	5.77820000432748e-05	Ifi44	interferon-induced protein 44 [Source:MGI Symbol;Acc:MGI:2443016]	-	-	-	-	GO:0005737//cytoplasm	GO:0003674//molecular_function	GO:0006955//immune response;GO:0009617//response to bacterium
ENSMUSG00000076937	564	775	648	241	371	357	38.19	61.19	49.72	20.24	29.10	24.98	49.7	24.7733333333333	-1.00445785078815	1.16835226131884e-06	5.77820000432748e-05	Iglc2	immunoglobulin lambda constant 2 [Source:MGI Symbol;Acc:MGI:99547]	-	-	-	-	GO:0005886//plasma membrane;GO:0009897//external side of plasma membrane;GO:0042571//immunoglobulin complex, circulating	GO:0003823//antigen binding;GO:0034987//immunoglobulin receptor binding	GO:0006910//phagocytosis, recognition;GO:0006911//phagocytosis, engulfment;GO:0006958//complement activation, classical pathway;GO:0042742//defense response to bacterium;GO:0045087//innate immune response;GO:0050853//B cell receptor signaling pathway;GO:0050871//positive regulation of B cell activation
ENSMUSG00000020889	3557	1853	1921	5006	4768	4620	54.41	33.49	32.83	95.69	85.32	73.55	40.2433333333333	84.8533333333333	1.07622152721238	1.23977656624287e-06	6.09311439290674e-05	Nr1d1	nuclear receptor subfamily 1, group D, member 1 [Source:MGI Symbol;Acc:MGI:2444210]	Organismal Systems	Environmental adaptation	ko04710//Circadian rhythm	K03728	GO:0000790//nuclear chromatin;GO:0005623//cell;GO:0005634//nucleus;GO:0005654//nucleoplasm;GO:0005737//cytoplasm;GO:0016604//nuclear body;GO:0030054//cell junction;GO:0030425//dendrite;GO:0042995//cell projection;GO:0043025//neuronal cell body;GO:0043197//dendritic spine;GO:0045202//synapse;GO:0090575//RNA polymerase II transcription factor complex	GO:0000976//transcription regulatory region sequence-specific DNA binding;GO:0000977//RNA polymerase II regulatory region sequence-specific DNA binding;GO:0000978//RNA polymerase II core promoter proximal region sequence-specific DNA binding;GO:0000981//RNA polymerase II transcription factor activity, sequence-specific DNA binding;GO:0001222//transcription corepressor binding;GO:0001227//transcri…	GO:0000122//negative regulation of transcription from RNA polymerase II promoter;GO:0001678//cellular glucose homeostasis;GO:0005978//glycogen biosynthetic process;GO:0006355//regulation of transcription, DNA-templated;GO:0007275//multicellular organism development;GO:0007623//circadian rhythm;GO:0009755//hormone-mediated signaling pathway;GO:0010498//proteasomal protein catabolic process;GO:0010…
ENSMUSG00000022838	149	175	113	24	60	43	6.29	8.85	5.32	1.21	2.79	1.89	6.82	1.96333333333333	-1.79646660591487	1.26399653170294e-06	6.15444998578704e-05	Eaf2	ELL associated factor 2 [Source:MGI Symbol;Acc:MGI:2146616]	-	-	-	-	GO:0005634//nucleus;GO:0005654//nucleoplasm;GO:0008023//transcription elongation factor complex;GO:0016607//nuclear speck;GO:0032783//ELL-EAF complex	GO:0000977//RNA polymerase II regulatory region sequence-specific DNA binding;GO:0001228//transcriptional activator activity, RNA polymerase II transcription regulatory region sequence-specific binding;GO:0005515//protein binding	GO:0006355//regulation of transcription, DNA-templated;GO:0030308//negative regulation of cell growth;GO:0045893//positive regulation of transcription, DNA-templated;GO:0045944//positive regulation of transcription from RNA polymerase II promoter;GO:0060770//negative regulation of epithelial cell proliferation involved in prostate gland development;GO:0097193//intrinsic apoptotic signaling pathway
ENSMUSG00000055415	179	175	151	66	87	81	1.06	1.18	0.97	0.47	0.59	0.50	1.07	0.52	-1.04102726826005	1.36212710820506e-06	6.55112325099112e-05	Atp10b	ATPase, class V, type 10B [Source:MGI Symbol;Acc:MGI:2442688]	-	-	-	-	GO:0005783//endoplasmic reticulum;GO:0005886//plasma membrane;GO:0016020//membrane;GO:0016021//integral component of membrane	GO:0000166//nucleotide binding;GO:0000287//magnesium ion binding;GO:0005524//ATP binding	GO:0015914//phospholipid transport;GO:0045332//phospholipid translocation
ENSMUSG00000030148	362	237	324	128	119	186	12.76	10.24	13.64	5.67	4.78	7.14	12.2133333333333	5.86333333333333	-1.05866402062498	1.3986590149136e-06	6.66566979622611e-05	Clec4a2	C-type lectin domain family 4, member a2 [Source:MGI Symbol;Acc:MGI:1349412]	-	-	-	-	GO:0005886//plasma membrane;GO:0016020//membrane;GO:0016021//integral component of membrane	GO:0005509//calcium ion binding;GO:0005537//mannose binding;GO:0030246//carbohydrate binding;GO:0046872//metal ion binding	GO:0001818//negative regulation of cytokine production;GO:0002250//adaptive immune response;GO:0002376//immune system process;GO:0002470//plasmacytoid dendritic cell antigen processing and presentation;GO:0032720//negative regulation of tumor necrosis factor production;GO:0036037//CD8-positive, alpha-beta T cell activation;GO:0042590//antigen processing and presentation of exogenous peptide antig…
ENSMUSG00000005364	135	95	108	25	42	14	1.96	1.97	2.03	0.50	0.75	0.36	1.98666666666667	0.536666666666667	-1.88825164234755	1.47859477537749e-06	6.9414507559289e-05	Il5ra	interleukin 5 receptor, alpha [Source:MGI Symbol;Acc:MGI:96558]	Human Diseases;Environmental Information Processing;Organismal Systems;Environmental Information Processing	Cancers;Signaling molecules and interaction;Immune system;Signal transduction	ko05200//Pathways in cancer;ko04060//Cytokine-cytokine receptor interaction;ko04640//Hematopoietic cell lineage;ko04630//Jak-STAT signaling pathway	K05067;K05067;K05067;K05067	GO:0009897//external side of plasma membrane;GO:0016020//membrane;GO:0016021//integral component of membrane;GO:0043235//receptor complex	GO:0004896//cytokine receptor activity;GO:0005515//protein binding;GO:0019955//cytokine binding	GO:0002437//inflammatory response to antigenic stimulus;GO:0019221//cytokine-mediated signaling pathway;GO:0032674//regulation of interleukin-5 production;GO:0071310//cellular response to organic substance
ENSMUSG00000013584	400	397	468	678	847	1944	7.11	8.20	9.19	14.88	17.47	36.38	8.16666666666667	22.91	1.4881582101359	1.53965385259117e-06	7.18520360228525e-05	Aldh1a2	aldehyde dehydrogenase family 1, subfamily A2 [Source:MGI Symbol;Acc:MGI:107928]	Metabolism;Metabolism	Global and overview maps;Metabolism of cofactors and vitamins	ko01100//Metabolic pathways;ko00830//Retinol metabolism	K07249;K07249	GO:0005737//cytoplasm;GO:0005829//cytosol;GO:0048471//perinuclear region of cytoplasm	GO:0001758//retinal dehydrogenase activity;GO:0004028//3-chloroallyl aldehyde dehydrogenase activity;GO:0004029//aldehyde dehydrogenase (NAD) activity;GO:0016491//oxidoreductase activity;GO:0016620//oxidoreductase activity, acting on the aldehyde or oxo group of donors, NAD or NADP as acceptor;GO:0016918//retinal binding	GO:0001523//retinoid metabolic process;GO:0001568//blood vessel development;GO:0001822//kidney development;GO:0001889//liver development;GO:0001936//regulation of endothelial cell proliferation;GO:0001947//heart looping;GO:0002138//retinoic acid biosynthetic process;GO:0003007//heart morphogenesis;GO:0007494//midgut development;GO:0007507//heart development;GO:0008284//positive regulation of cell…
ENSMUSG00000040907	1003	1657	624	292	396	445	11.14	21.38	7.66	4.00	5.10	5.20	13.3933333333333	4.76666666666667	-1.49046241706754	1.54918853677913e-06	7.20268316872266e-05	Atp1a3	ATPase, Na+/K+ transporting, alpha 3 polypeptide [Source:MGI Symbol;Acc:MGI:88107]	Environmental Information Processing;Environmental Information Processing;Organismal Systems;Organismal Systems;Organismal Systems;Organismal Systems;Organismal Systems;Organismal Systems;Organismal Systems;Organismal Systems;Organismal Systems;Organismal Systems;Organismal Systems;Organismal Systems;Organismal Systems;Organismal Systems;Organismal Systems;Organismal Systems	Signal transduction;Signal transduction;Circulatory system;Endocrine system;Digestive system;Endocrine system;Digestive system;Circulatory system;Endocrine system;Digestive system;Digestive system;Digestive system;Endocrine system;Excretory system;Digestive system;Digestive system;Excretory system;Excretory system	ko04024//cAMP signaling pathway;ko04022//cGMP - PKG signaling pathway;ko04261//Adrenergic signaling in cardiomyocytes;ko04919//Thyroid hormone signaling pathway;ko04972//Pancreatic secretion;ko04925//Aldosterone synthesis and secretion;ko04974//Protein digestion and absorption;ko04260//Cardiac muscle contraction;ko04911//Insulin secretion;ko04976//Bile secretion;ko04970//Salivary secretion;ko0497…	K01539;K01539;K01539;K01539;K01539;K01539;K01539;K01539;K01539;K01539;K01539;K01539;K01539;K01539;K01539;K01539;K01539;K01539	GO:0001917//photoreceptor inner segment;GO:0005623//cell;GO:0005634//nucleus;GO:0005737//cytoplasm;GO:0005783//endoplasmic reticulum;GO:0005794//Golgi apparatus;GO:0005886//plasma membrane;GO:0005890//sodium:potassium-exchanging ATPase complex;GO:0016020//membrane;GO:0016021//integral component of membrane;GO:0030424//axon;GO:0031090//organelle membrane;GO:0042383//sarcolemma;GO:0043025//neuronal…	GO:0000166//nucleotide binding;GO:0001540//beta-amyloid binding;GO:0005391//sodium:potassium-exchanging ATPase activity;GO:0005524//ATP binding;GO:0008556//potassium-transporting ATPase activity;GO:0031748//D1 dopamine receptor binding;GO:0043395//heparan sulfate proteoglycan binding;GO:0046872//metal ion binding;GO:0051087//chaperone binding;GO:0086037//sodium:potassium-exchanging ATPase activit…	GO:0006811//ion transport;GO:0006813//potassium ion transport;GO:0006814//sodium ion transport;GO:0006883//cellular sodium ion homeostasis;GO:0007613//memory;GO:0008344//adult locomotory behavior;GO:0008542//visual learning;GO:0010248//establishment or maintenance of transmembrane electrochemical gradient;GO:0021987//cerebral cortex development;GO:0030007//cellular potassium ion homeostasis;GO:00…
ENSMUSG00000096499	87	376	143	39	36	21	8.87	44.54	16.10	4.90	4.26	2.25	23.17	3.80333333333333	-2.6069217532973	1.57728257253671e-06	7.29585971126024e-05	Ighv1-5	immunoglobulin heavy variable V1-5 [Source:MGI Symbol;Acc:MGI:3704121]	Environmental Information Processing;Human Diseases;Human Diseases;Environmental Information Processing;Cellular Processes;Human Diseases;Human Diseases;Environmental Information Processing;Human Diseases;Human Diseases;Human Diseases;Environmental Information Processing;Organismal Systems;Human Diseases;Human Diseases;Organismal Systems;Organismal Systems;Human Diseases;Organismal Systems;Human …	Signal transduction;Infectious diseases;Infectious diseases;Signal transduction;Transport and catabolism;Cancers;Infectious diseases;Signal transduction;Immune diseases;Infectious diseases;Infectious diseases;Signal transduction;Immune system;Immune diseases;Cardiovascular diseases;Immune system;Immune system;Cardiovascular diseases;Immune system;Immune diseases;Infectious diseases;Immune system;…	ko04151//PI3K-Akt signaling pathway;ko05169//Epstein-Barr virus infection;ko05130//Pathogenic Escherichia coli infection;ko04020//Calcium signaling pathway;ko04145//Phagosome;ko05202//Transcriptional misregulation in cancers;ko05152//Tuberculosis;ko04072//Phospholipase D signaling pathway;ko05322//Systemic lupus erythematosus;ko05150//Staphylococcus aureus infection;ko05146//Amoebiasis;ko04064//N…	K06856;K06856;K06856;K06856;K06856;K06856;K06856;K06856;K06856;K06856;K06856;K06856;K06856;K06856;K06856;K06856;K06856;K06856;K06856;K06856;K06856;K06856;K06856;K06856;K06856;K06856;K06856	GO:0009897//external side of plasma membrane;GO:0042571//immunoglobulin complex, circulating	GO:0003823//antigen binding;GO:0034987//immunoglobulin receptor binding	GO:0006910//phagocytosis, recognition;GO:0006911//phagocytosis, engulfment;GO:0006958//complement activation, classical pathway;GO:0042742//defense response to bacterium;GO:0045087//innate immune response;GO:0050853//B cell receptor signaling pathway;GO:0050871//positive regulation of B cell activation
ENSMUSG00000022014	356	466	421	136	208	240	7.92	12.05	10.12	3.75	5.35	5.54	10.03	4.88	-1.03936855304929	1.79510743887265e-06	8.25486979273397e-05	Epsti1	epithelial stromal interaction 1 (breast) [Source:MGI Symbol;Acc:MGI:1915168]	-	-	-	-	GO:0005575//cellular_component	GO:0003674//molecular_function	GO:0008150//biological_process
ENSMUSG00000071856	573	321	485	752	1042	830	5.51	3.78	5.51	9.31	12.34	9.19	4.93333333333333	10.28	1.05920558939872	1.85459213923871e-06	8.45425234023395e-05	Mcc	mutated in colorectal cancers [Source:MGI Symbol;Acc:MGI:96930]	-	-	-	-	GO:0005634//nucleus;GO:0005654//nucleoplasm;GO:0005737//cytoplasm;GO:0005829//cytosol;GO:0005886//plasma membrane;GO:0036464//cytoplasmic ribonucleoprotein granule	GO:0005509//calcium ion binding	GO:0010633//negative regulation of epithelial cell migration;GO:0045184//establishment of protein localization;GO:0050680//negative regulation of epithelial cell proliferation;GO:0090090//negative regulation of canonical Wnt signaling pathway
ENSMUSG00000001739	172	126	129	278	303	898	3.71	3.14	3.16	7.40	7.56	20.24	3.33666666666667	11.7333333333333	1.81413345468866	1.95696413448532e-06	8.89513726677763e-05	Cldn15	claudin 15 [Source:MGI Symbol;Acc:MGI:1913103]	Human Diseases;Cellular Processes;Human Diseases;Environmental Information Processing;Organismal Systems	Infectious diseases;Cellular community - eukaryotes;Infectious diseases;Signaling molecules and interaction;Immune system	ko05130//Pathogenic Escherichia coli infection;ko04530//Tight junction;ko05160//Hepatitis C;ko04514//Cell adhesion molecules (CAMs);ko04670//Leukocyte transendothelial migration	K06087;K06087;K06087;K06087;K06087	GO:0005886//plasma membrane;GO:0005923//bicellular tight junction;GO:0016020//membrane;GO:0016021//integral component of membrane;GO:0016328//lateral plasma membrane;GO:0030054//cell junction	GO:0005198//structural molecule activity;GO:0042802//identical protein binding	GO:0006811//ion transport;GO:0016338//calcium-independent cell-cell adhesion via plasma membrane cell-adhesion molecules
ENSMUSG00000022587	9307	16268	17104	5772	6357	7862	437.19	863.60	872.97	329.10	346.84	383.88	724.586666666667	353.273333333333	-1.03637340637647	1.99583574028652e-06	8.9949111721034e-05	Ly6e	lymphocyte antigen 6 complex, locus E [Source:MGI Symbol;Acc:MGI:106651]	-	-	-	-	GO:0016020//membrane;GO:0016021//integral component of membrane	-	-
ENSMUSG00000028111	3115	5846	1916	583	737	715	82.96	180.90	56.34	19.14	22.75	20.04	106.733333333333	20.6433333333333	-2.37026295668609	2.24383496979958e-06	9.99682509066232e-05	Ctsk	cathepsin K [Source:MGI Symbol;Acc:MGI:107823]	Human Diseases;Cellular Processes;Cellular Processes;Organismal Systems;Organismal Systems	Immune diseases;Cell growth and death;Transport and catabolism;Development;Immune system	ko05323//Rheumatoid arthritis;ko04210//Apoptosis;ko04142//Lysosome;ko04380//Osteoclast differentiation;ko04620//Toll-like receptor signaling pathway	K01371;K01371;K01371;K01371;K01371	GO:0005576//extracellular region;GO:0005615//extracellular space;GO:0005654//nucleoplasm;GO:0005737//cytoplasm;GO:0005764//lysosome;GO:0005886//plasma membrane;GO:0009897//external side of plasma membrane;GO:0016020//membrane;GO:0016324//apical plasma membrane;GO:0043231//intracellular membrane-bounded organelle	GO:0001968//fibronectin binding;GO:0004197//cysteine-type endopeptidase activity;GO:0005518//collagen binding;GO:0008233//peptidase activity;GO:0008234//cysteine-type peptidase activity;GO:0016787//hydrolase activity;GO:0043394//proteoglycan binding	GO:0001957//intramembranous ossification;GO:0006508//proteolysis;GO:0006590//thyroid hormone generation;GO:0006955//immune response;GO:0030574//collagen catabolic process;GO:0045453//bone resorption;GO:0051603//proteolysis involved in cellular protein catabolic process;GO:0061037//negative regulation of cartilage development
ENSMUSG00000036853	0	0	0	28	25	9	0.00	0.00	0.00	0.47	0.38	0.13	0.001	0.326666666666667	8.35167543828142	2.28417100175774e-06	0.000101477845606339	Mcoln3	mucolipin 3 [Source:MGI Symbol;Acc:MGI:1890500]	-	-	-	-	GO:0000421//autophagosome membrane;GO:0005623//cell;GO:0005737//cytoplasm;GO:0005765//lysosomal membrane;GO:0005768//endosome;GO:0005886//plasma membrane;GO:0016020//membrane;GO:0016021//integral component of membrane;GO:0031410//cytoplasmic vesicle;GO:0031901//early endosome membrane;GO:0031902//late endosome membrane;GO:0042995//cell projection;GO:0060171//stereocilium membrane	GO:0005261//cation channel activity;GO:0008289//lipid binding;GO:0072345//NAADP-sensitive calcium-release channel activity	GO:0006811//ion transport;GO:0007626//locomotory behavior;GO:0034220//ion transmembrane transport;GO:0042491//auditory receptor cell differentiation;GO:0051209//release of sequestered calcium ion into cytosol;GO:0098655//cation transmembrane transport
ENSMUSG00000079017	2786	6100	6879	693	1362	1204	242.29	616.47	660.63	74.35	137.34	110.18	506.463333333333	107.29	-2.23894220983726	2.33049264706266e-06	0.000102954095113355	Ifi27l2a	interferon, alpha-inducible protein 27 like 2A [Source:MGI Symbol;Acc:MGI:1924183]	-	-	-	-	GO:0005634//nucleus;GO:0005637//nuclear inner membrane;GO:0005739//mitochondrion;GO:0016020//membrane;GO:0016021//integral component of membrane	GO:0003674//molecular_function	GO:0007568//aging;GO:0009615//response to virus;GO:0097190//apoptotic signaling pathway
ENSMUSG00000031004	1424	1576	1146	512	871	558	7.83	10.49	7.49	3.82	4.04	3.17	8.60333333333333	3.67666666666667	-1.22649735050259	2.47591075616651e-06	0.000107269004028184	Mki67	antigen identified by monoclonal antibody Ki 67 [Source:MGI Symbol;Acc:MGI:106035]	-	-	-	-	GO:0000775//chromosome, centromeric region;GO:0000793//condensed chromosome;GO:0005634//nucleus;GO:0005654//nucleoplasm;GO:0005694//chromosome;GO:0005730//nucleolus;GO:0005737//cytoplasm;GO:0016604//nuclear body	GO:0000166//nucleotide binding;GO:0003677//DNA binding;GO:0005515//protein binding;GO:0005524//ATP binding;GO:0008022//protein C-terminus binding	GO:0007049//cell cycle;GO:0007088//regulation of mitotic nuclear division;GO:0008283//cell proliferation;GO:0051321//meiotic cell cycle;GO:0051983//regulation of chromosome segregation;GO:0072574//hepatocyte proliferation;GO:1902275//regulation of chromatin organization;GO:1990705//cholangiocyte proliferation
ENSMUSG00000037921	602	1529	1404	390	444	415	5.57	15.32	13.51	4.59	4.45	3.87	11.4666666666667	4.30333333333333	-1.41391956428228	2.50535424537604e-06	0.000107949880046655	Ddx60	DEAD (Asp-Glu-Ala-Asp) box polypeptide 60 [Source:MGI Symbol;Acc:MGI:2384570]	-	-	-	-	GO:0005737//cytoplasm;GO:0005829//cytosol;GO:0045111//intermediate filament cytoskeleton	GO:0003676//nucleic acid binding;GO:0003690//double-stranded DNA binding;GO:0003723//RNA binding;GO:0003725//double-stranded RNA binding;GO:0003727//single-stranded RNA binding;GO:0005515//protein binding;GO:0005524//ATP binding	GO:0009615//response to virus;GO:0051607//defense response to virus;GO:1900245//positive regulation of MDA-5 signaling pathway;GO:1900246//positive regulation of RIG-I signaling pathway
ENSMUSG00000044583	762	902	845	462	295	476	9.50	13.84	12.79	6.59	4.08	6.10	12.0433333333333	5.59	-1.10731456586809	2.74600211490742e-06	0.000117674047033103	Tlr7	toll-like receptor 7 [Source:MGI Symbol;Acc:MGI:2176882]	Human Diseases;Human Diseases;Organismal Systems	Infectious diseases;Infectious diseases;Immune system	ko05164//Influenza A;ko05162//Measles;ko04620//Toll-like receptor signaling pathway	K05404;K05404;K05404	GO:0005737//cytoplasm;GO:0005764//lysosome;GO:0005768//endosome;GO:0005783//endoplasmic reticulum;GO:0005789//endoplasmic reticulum membrane;GO:0005886//plasma membrane;GO:0016020//membrane;GO:0016021//integral component of membrane;GO:0031410//cytoplasmic vesicle;GO:0032009//early phagosome;GO:0043235//receptor complex;GO:0045335//phagocytic vesicle	GO:0003725//double-stranded RNA binding;GO:0003727//single-stranded RNA binding;GO:0004888//transmembrane signaling receptor activity;GO:0005515//protein binding;GO:0008144//drug binding;GO:0035197//siRNA binding;GO:0038187//pattern recognition receptor activity	GO:0001774//microglial cell activation;GO:0001932//regulation of protein phosphorylation;GO:0002224//toll-like receptor signaling pathway;GO:0002376//immune system process;GO:0002755//MyD88-dependent toll-like receptor signaling pathway;GO:0006954//inflammatory response;GO:0006955//immune response;GO:0007165//signal transduction;GO:0007249//I-kappaB kinase/NF-kappaB signaling;GO:0007252//I-kappaB…
ENSMUSG00000076541	79	100	209	8	20	39	8.89	13.07	25.96	1.11	2.61	4.62	15.9733333333333	2.78	-2.52250861934412	3.20536423364775e-06	0.000132659903427837	Igkv4-79	immunoglobulin kappa variable 4-79 [Source:MGI Symbol;Acc:MGI:2685040]	-	-	-	-	GO:0005615//extracellular space	-	GO:0002377//immunoglobulin production;GO:0006955//immune response
ENSMUSG00000050967	129	202	83	30	45	36	0.85	1.55	0.61	0.24	0.34	0.25	1.00333333333333	0.276666666666667	-1.85858024541277	3.37830672168511e-06	0.000138361015135265	Creg2	cellular repressor of E1A-stimulated genes 2 [Source:MGI Symbol;Acc:MGI:1928333]	-	-	-	-	GO:0005576//extracellular region;GO:0005615//extracellular space;GO:0005783//endoplasmic reticulum;GO:0005794//Golgi apparatus	GO:0003674//molecular_function;GO:0048037//cofactor binding	GO:0008150//biological_process
ENSMUSG00000023132	1125	1362	2003	549	491	905	51.54	72.57	101.34	31.06	26.10	43.65	75.15	33.6033333333333	-1.16116875372854	3.49995439621096e-06	0.000142231996871343	Gzma	granzyme A [Source:MGI Symbol;Acc:MGI:109266]	Environmental Information Processing	Signaling molecules and interaction	ko04080//Neuroactive ligand-receptor interaction	K01352	GO:0005576//extracellular region;GO:0005634//nucleus	GO:0004252//serine-type endopeptidase activity;GO:0008233//peptidase activity;GO:0008236//serine-type peptidase activity;GO:0016787//hydrolase activity;GO:0042803//protein homodimerization activity	GO:0006508//proteolysis;GO:0006915//apoptotic process;GO:0009617//response to bacterium;GO:0019835//cytolysis;GO:0032078//negative regulation of endodeoxyribonuclease activity;GO:0043065//positive regulation of apoptotic process;GO:0043392//negative regulation of DNA binding;GO:0051354//negative regulation of oxidoreductase activity;GO:0051603//proteolysis involved in cellular protein catabolic p…
ENSMUSG00000069793	246	568	523	117	177	172	2.65	7.04	5.90	1.20	2.04	1.75	5.19666666666667	1.66333333333333	-1.64350920736053	4.99377198361078e-06	0.000193515565678241	Slfn9	schlafen 9 [Source:MGI Symbol;Acc:MGI:2445121]	-	-	-	-	GO:0005634//nucleus;GO:0005737//cytoplasm	GO:0000049//tRNA binding;GO:0000166//nucleotide binding;GO:0004518//nuclease activity;GO:0004519//endonuclease activity;GO:0004521//endoribonuclease activity;GO:0005524//ATP binding;GO:0008270//zinc ion binding;GO:0016787//hydrolase activity;GO:0046872//metal ion binding	GO:0051607//defense response to virus;GO:0090305//nucleic acid phosphodiester bond hydrolysis;GO:0090502//RNA phosphodiester bond hydrolysis, endonucleolytic
ENSMUSG00000035456	27	25	47	113	83	105	0.33	0.33	0.62	1.69	1.17	1.34	0.426666666666667	1.4	1.71424551766612	5.1950942082065e-06	0.000199276211249911	Prdm8	PR domain containing 8 [Source:MGI Symbol;Acc:MGI:1924880]	-	-	-	-	GO:0005634//nucleus	GO:0003676//nucleic acid binding;GO:0005515//protein binding	-
ENSMUSG00000028341	350	197	406	71	152	110	2.69	1.71	3.79	0.88	1.80	0.88	2.73	1.18666666666667	-1.20198621067461	5.23791701894293e-06	0.000200429977997361	Nr4a3	nuclear receptor subfamily 4, group A, member 3 [Source:MGI Symbol;Acc:MGI:1352457]	Human Diseases	Cancers	ko05202//Transcriptional misregulation in cancers	K08559	GO:0005634//nucleus;GO:0005667//transcription factor complex;GO:0042629//mast cell granule	GO:0000977//RNA polymerase II regulatory region sequence-specific DNA binding;GO:0000978//RNA polymerase II core promoter proximal region sequence-specific DNA binding;GO:0001223//transcription coactivator binding;GO:0001228//transcriptional activator activity, RNA polymerase II transcription regulatory region sequence-specific binding;GO:0003677//DNA binding;GO:0003700//transcription factor acti…	GO:0000122//negative regulation of transcription from RNA polymerase II promoter;GO:0001707//mesoderm formation;GO:0006355//regulation of transcription, DNA-templated;GO:0007369//gastrulation;GO:0007411//axon guidance;GO:0009444//pyruvate oxidation;GO:0010613//positive regulation of cardiac muscle hypertrophy;GO:0010828//positive regulation of glucose transport;GO:0021766//hippocampus development…
ENSMUSG00000003882	1383	1709	695	492	521	358	18.94	26.50	10.63	9.18	9.27	6.24	18.69	8.23	-1.18330223332353	5.26459957337543e-06	0.000200518074016272	Il7r	interleukin 7 receptor [Source:MGI Symbol;Acc:MGI:96562]	Human Diseases;Environmental Information Processing;Environmental Information Processing;Organismal Systems;Environmental Information Processing;Human Diseases;Environmental Information Processing	Cancers;Signal transduction;Signaling molecules and interaction;Immune system;Signal transduction;Immune diseases;Signal transduction	ko05200//Pathways in cancer;ko04151//PI3K-Akt signaling pathway;ko04060//Cytokine-cytokine receptor interaction;ko04640//Hematopoietic cell lineage;ko04630//Jak-STAT signaling pathway;ko05340//Primary immunodeficiency;ko04068//FoxO signaling pathway	K05072;K05072;K05072;K05072;K05072;K05072;K05072	GO:0005886//plasma membrane;GO:0009897//external side of plasma membrane;GO:0016020//membrane;GO:0016021//integral component of membrane	GO:0004896//cytokine receptor activity;GO:0005515//protein binding	GO:0000902//cell morphogenesis;GO:0001915//negative regulation of T cell mediated cytotoxicity;GO:0002377//immunoglobulin production;GO:0008284//positive regulation of cell proliferation;GO:0008361//regulation of cell size;GO:0010628//positive regulation of gene expression;GO:0019221//cytokine-mediated signaling pathway;GO:0030217//T cell differentiation;GO:0033089//positive regulation of T cell …
ENSMUSG00000076532	535	461	194	32	85	153	60.17	60.25	24.10	4.44	11.09	18.11	48.1733333333333	11.2133333333333	-2.1030195491773	5.53131297866162e-06	0.000208333512108276	Igkv4-91	immunoglobulin kappa chain variable 4-91 [Source:MGI Symbol;Acc:MGI:3642277]	-	-	-	-	GO:0005615//extracellular space	-	GO:0002377//immunoglobulin production;GO:0006955//immune response
ENSMUSG00000002831	520	492	419	615	1359	1052	3.30	3.63	2.93	4.81	9.99	7.03	3.28666666666667	7.27666666666667	1.14665257861288	5.5371913309124e-06	0.000208333512108276	Plin4	perilipin 4 [Source:MGI Symbol;Acc:MGI:1929709]	Organismal Systems	Endocrine system	ko03320//PPAR signaling pathway	K20254	GO:0005737//cytoplasm;GO:0005811//lipid particle;GO:0005829//cytosol;GO:0005886//plasma membrane;GO:0016020//membrane;GO:0043231//intracellular membrane-bounded organelle	-	-
ENSMUSG00000020838	164	100	166	222	300	372	2.42	1.72	3.07	4.55	5.78	5.78	2.40333333333333	5.37	1.15988532946575	5.58283188344567e-06	0.000209398453954883	Slc6a4	solute carrier family 6 (neurotransmitter transporter, serotonin), member 4 [Source:MGI Symbol;Acc:MGI:96285]	Organismal Systems;Organismal Systems	Nervous system;Nervous system	ko04726//Serotonergic synapse;ko04721//Synaptic vesicle cycle	K05037;K05037	GO:0005768//endosome;GO:0005886//plasma membrane;GO:0005887//integral component of plasma membrane;GO:0005925//focal adhesion;GO:0010008//endosome membrane;GO:0012505//endomembrane system;GO:0016020//membrane;GO:0016021//integral component of membrane;GO:0030054//cell junction;GO:0043005//neuron projection;GO:0045121//membrane raft;GO:0045202//synapse;GO:0098793//presynapse	GO:0005328//neurotransmitter:sodium symporter activity;GO:0005335//serotonin:sodium symporter activity;GO:0005515//protein binding;GO:0008504//monoamine transmembrane transporter activity;GO:0015293//symporter activity;GO:0017075//syntaxin-1 binding;GO:0019811//cocaine binding;GO:0042802//identical protein binding;GO:0046872//metal ion binding;GO:0050998//nitric-oxide synthase binding;GO:0051015/…	GO:0001666//response to hypoxia;GO:0006836//neurotransmitter transport;GO:0006837//serotonin transport;GO:0007420//brain development;GO:0007584//response to nutrient;GO:0007613//memory;GO:0007623//circadian rhythm;GO:0009636//response to toxic substance;GO:0010033//response to organic substance;GO:0010628//positive regulation of gene expression;GO:0014064//positive regulation of serotonin secreti…
ENSMUSG00000034282	392	247	416	506	672	870	2.47	1.81	2.90	3.94	4.91	5.77	2.39333333333333	4.87333333333333	1.02588756212939	5.59212504998099e-06	0.000209398453954883	Evpl	envoplakin [Source:MGI Symbol;Acc:MGI:107507]	-	-	-	-	GO:0001533//cornified envelope;GO:0005737//cytoplasm;GO:0005829//cytosol;GO:0005856//cytoskeleton;GO:0005882//intermediate filament;GO:0016020//membrane;GO:0030054//cell junction;GO:0030057//desmosome;GO:0045111//intermediate filament cytoskeleton	GO:0005198//structural molecule activity;GO:0005515//protein binding;GO:0019215//intermediate filament binding	GO:0008544//epidermis development;GO:0018149//peptide cross-linking;GO:0030216//keratinocyte differentiation;GO:0031424//keratinization;GO:0042060//wound healing;GO:0045104//intermediate filament cytoskeleton organization
ENSMUSG00000104452	60	81	73	25	11	14	6.77	10.61	9.08	3.45	1.43	1.63	8.82	2.17	-2.02308361311304	5.66783959222154e-06	0.000211227756556559	Ighv8-8	immunoglobulin heavy variable 8-8 [Source:MGI Symbol;Acc:MGI:3815333]	Environmental Information Processing;Human Diseases;Human Diseases;Environmental Information Processing;Cellular Processes;Human Diseases;Human Diseases;Environmental Information Processing;Human Diseases;Human Diseases;Human Diseases;Environmental Information Processing;Organismal Systems;Human Diseases;Human Diseases;Organismal Systems;Organismal Systems;Human Diseases;Organismal Systems;Human …	Signal transduction;Infectious diseases;Infectious diseases;Signal transduction;Transport and catabolism;Cancers;Infectious diseases;Signal transduction;Immune diseases;Infectious diseases;Infectious diseases;Signal transduction;Immune system;Immune diseases;Cardiovascular diseases;Immune system;Immune system;Cardiovascular diseases;Immune system;Immune diseases;Infectious diseases;Immune system;…	ko04151//PI3K-Akt signaling pathway;ko05169//Epstein-Barr virus infection;ko05130//Pathogenic Escherichia coli infection;ko04020//Calcium signaling pathway;ko04145//Phagosome;ko05202//Transcriptional misregulation in cancers;ko05152//Tuberculosis;ko04072//Phospholipase D signaling pathway;ko05322//Systemic lupus erythematosus;ko05150//Staphylococcus aureus infection;ko05146//Amoebiasis;ko04064//N…	K06856;K06856;K06856;K06856;K06856;K06856;K06856;K06856;K06856;K06856;K06856;K06856;K06856;K06856;K06856;K06856;K06856;K06856;K06856;K06856;K06856;K06856;K06856;K06856;K06856;K06856;K06856	GO:0009897//external side of plasma membrane;GO:0042571//immunoglobulin complex, circulating	GO:0003823//antigen binding;GO:0034987//immunoglobulin receptor binding	GO:0006910//phagocytosis, recognition;GO:0006911//phagocytosis, engulfment;GO:0006958//complement activation, classical pathway;GO:0042742//defense response to bacterium;GO:0045087//innate immune response;GO:0050853//B cell receptor signaling pathway;GO:0050871//positive regulation of B cell activation
ENSMUSG00000094356	153	1402	2763	14	63	53	16.65	177.30	332.04	1.88	7.95	6.07	175.33	5.3	-5.04793670097221	6.00104790314043e-06	0.000221545728574389	Igkv8-28	immunoglobulin kappa variable 8-28 [Source:MGI Symbol;Acc:MGI:3642251]	-	-	-	-	GO:0005615//extracellular space	-	GO:0002377//immunoglobulin production;GO:0006955//immune response
ENSMUSG00000095567	132	139	139	51	66	73	1.91	2.34	2.22	0.92	1.10	1.12	2.15666666666667	1.04666666666667	-1.04300115310088	6.0611682865439e-06	0.000222719611314196	Noc2l	NOC2 like nucleolar associated transcriptional repressor [Source:MGI Symbol;Acc:MGI:1931051]	-	-	-	-	GO:0005634//nucleus;GO:0005654//nucleoplasm;GO:0005730//nucleolus;GO:0005829//cytosol	GO:0003682//chromatin binding;GO:0003714//transcription corepressor activity;GO:0031491//nucleosome binding;GO:0042393//histone binding;GO:0070491//repressing transcription factor binding	GO:0000122//negative regulation of transcription from RNA polymerase II promoter;GO:0002903//negative regulation of B cell apoptotic process;GO:0031497//chromatin assembly;GO:0034644//cellular response to UV;GO:0035067//negative regulation of histone acetylation;GO:2001243//negative regulation of intrinsic apoptotic signaling pathway
ENSMUSG00000048834	17	7	28	87	61	81	0.50	0.28	0.77	2.72	2.03	2.03	0.516666666666667	2.26	2.12901705786211	6.0880840601682e-06	0.000223187174858427	Vstm2a	V-set and transmembrane domain containing 2A [Source:MGI Symbol;Acc:MGI:2384826]	-	-	-	-	GO:0005576//extracellular region;GO:0016021//integral component of membrane	GO:0042802//identical protein binding	GO:0010628//positive regulation of gene expression;GO:0010884//positive regulation of lipid storage;GO:0030154//cell differentiation;GO:0070352//positive regulation of white fat cell proliferation;GO:0071773//cellular response to BMP stimulus;GO:0090336//positive regulation of brown fat cell differentiation
ENSMUSG00000015947	266	351	445	102	124	205	4.38	7.86	9.24	2.23	2.24	4.32	7.16	2.93	-1.28905892284201	6.80720378572603e-06	0.000247816884116003	Fcgr1	Fc receptor, IgG, high affinity I [Source:MGI Symbol;Acc:MGI:95498]	Cellular Processes;Human Diseases;Human Diseases;Human Diseases;Human Diseases;Organismal Systems;Organismal Systems;Human Diseases;Organismal Systems;Human Diseases	Transport and catabolism;Cancers;Infectious diseases;Immune diseases;Infectious diseases;Immune system;Immune system;Infectious diseases;Development;Cancers	ko04145//Phagosome;ko05202//Transcriptional misregulation in cancers;ko05152//Tuberculosis;ko05322//Systemic lupus erythematosus;ko05150//Staphylococcus aureus infection;ko04640//Hematopoietic cell lineage;ko04666//Fc gamma R-mediated phagocytosis;ko05140//Leishmaniasis;ko04380//Osteoclast differentiation;ko05221//Acute myeloid leukemia	K06498;K06498;K06498;K06498;K06498;K06498;K06498;K06498;K06498;K06498	GO:0005886//plasma membrane;GO:0009897//external side of plasma membrane;GO:0016020//membrane;GO:0016021//integral component of membrane;GO:0045121//membrane raft	GO:0019770//IgG receptor activity;GO:0019864//IgG binding;GO:0031774//leukotriene receptor binding	GO:0001788//antibody-dependent cellular cytotoxicity;GO:0001798//positive regulation of type IIa hypersensitivity;GO:0001805//positive regulation of type III hypersensitivity;GO:0002376//immune system process;GO:0006898//receptor-mediated endocytosis;GO:0006910//phagocytosis, recognition;GO:0006911//phagocytosis, engulfment;GO:0007166//cell surface receptor signaling pathway;GO:0009617//response …
ENSMUSG00000046718	689	1469	1563	346	448	631	35.03	86.79	87.75	21.70	26.41	33.76	69.8566666666667	27.29	-1.35602540903967	7.0368876967811e-06	0.000254998001860084	Bst2	bone marrow stromal cell antigen 2 [Source:MGI Symbol;Acc:MGI:1916800]	Human Diseases;Human Diseases	Infectious diseases;Infectious disease: viral	ko05168//Herpes simplex infection;ko05170//Human immunodeficiency virus 1 infection	K06731;K06731	GO:0005737//cytoplasm;GO:0005768//endosome;GO:0005770//late endosome;GO:0005794//Golgi apparatus;GO:0005886//plasma membrane;GO:0009986//cell surface;GO:0016020//membrane;GO:0016021//integral component of membrane;GO:0016324//apical plasma membrane;GO:0031225//anchored component of membrane;GO:0045121//membrane raft	GO:0008191//metalloendopeptidase inhibitor activity	GO:0002376//immune system process;GO:0002737//negative regulation of plasmacytoid dendritic cell cytokine production;GO:0009615//response to virus;GO:0010951//negative regulation of endopeptidase activity;GO:0030308//negative regulation of cell growth;GO:0030336//negative regulation of cell migration;GO:0032956//regulation of actin cytoskeleton organization;GO:0034341//response to interferon-gamm…
ENSMUSG00000022906	1770	3466	3334	1204	1250	1466	23.99	54.70	49.75	20.83	18.98	20.69	42.8133333333333	20.1666666666667	-1.08608752267645	7.29109970900238e-06	0.000262997993402478	Parp9	poly (ADP-ribose) polymerase family, member 9 [Source:MGI Symbol;Acc:MGI:1933117]	-	-	-	-	GO:0005634//nucleus;GO:0005654//nucleoplasm;GO:0005737//cytoplasm;GO:0005739//mitochondrion;GO:0005829//cytosol;GO:0032991//macromolecular complex	GO:0003714//transcription corepressor activity;GO:0003950//NAD+ ADP-ribosyltransferase activity;GO:0004857//enzyme inhibitor activity;GO:0016740//transferase activity;GO:0019899//enzyme binding;GO:0042393//histone binding;GO:0044389//ubiquitin-like protein ligase binding;GO:0072570//ADP-D-ribose binding;GO:0097677//STAT family protein binding	GO:0000122//negative regulation of transcription from RNA polymerase II promoter;GO:0002230//positive regulation of defense response to virus by host;GO:0002376//immune system process;GO:0006281//DNA repair;GO:0006302//double-strand break repair;GO:0006471//protein ADP-ribosylation;GO:0006974//cellular response to DNA damage stimulus;GO:0010608//posttranscriptional regulation of gene expression;G…
ENSMUSG00000052435	53	37	41	8	6	13	1.72	1.40	1.47	0.32	0.23	0.44	1.53	0.33	-2.2129937233342	7.33649410236956e-06	0.000264029846105185	Cebpe	CCAAT/enhancer binding protein (C/EBP), epsilon [Source:MGI Symbol;Acc:MGI:103572]	Human Diseases;Human Diseases	Cancers;Cancers	ko05202//Transcriptional misregulation in cancers;ko05221//Acute myeloid leukemia	K10051;K10051	GO:0005634//nucleus	GO:0000978//RNA polymerase II core promoter proximal region sequence-specific DNA binding;GO:0001228//transcriptional activator activity, RNA polymerase II transcription regulatory region sequence-specific binding;GO:0003677//DNA binding;GO:0003700//transcription factor activity, sequence-specific DNA binding;GO:0042802//identical protein binding;GO:0044877//macromolecular complex binding	GO:0006355//regulation of transcription, DNA-templated;GO:0006909//phagocytosis;GO:0010628//positive regulation of gene expression;GO:0030099//myeloid cell differentiation;GO:0030225//macrophage differentiation;GO:0030851//granulocyte differentiation;GO:0042089//cytokine biosynthetic process;GO:0042742//defense response to bacterium;GO:0045944//positive regulation of transcription from RNA polyme…
ENSMUSG00000026896	1755	3374	3238	1323	1233	1226	14.73	32.64	30.34	14.08	11.68	11.18	25.9033333333333	12.3133333333333	-1.0729163954029	7.97321836855436e-06	0.000282012059695818	Ifih1	interferon induced with helicase C domain 1 [Source:MGI Symbol;Acc:MGI:1918836]	Human Diseases;Human Diseases;Human Diseases;Human Diseases;Organismal Systems	Infectious diseases;Infectious diseases;Infectious diseases;Infectious diseases;Immune system	ko05168//Herpes simplex infection;ko05164//Influenza A;ko05161//Hepatitis B;ko05162//Measles;ko04622//RIG-I-like receptor signaling pathway	K12647;K12647;K12647;K12647;K12647	GO:0005634//nucleus;GO:0005737//cytoplasm	GO:0000166//nucleotide binding;GO:0003677//DNA binding;GO:0003723//RNA binding;GO:0003724//RNA helicase activity;GO:0003725//double-stranded RNA binding;GO:0003727//single-stranded RNA binding;GO:0004386//helicase activity;GO:0005515//protein binding;GO:0005524//ATP binding;GO:0008270//zinc ion binding;GO:0016787//hydrolase activity;GO:0042802//identical protein binding;GO:0043021//ribonucleoprot…	GO:0002376//immune system process;GO:0009615//response to virus;GO:0016925//protein sumoylation;GO:0032727//positive regulation of interferon-alpha production;GO:0032728//positive regulation of interferon-beta production;GO:0035549//positive regulation of interferon-beta secretion;GO:0039530//MDA-5 signaling pathway;GO:0045087//innate immune response;GO:0051607//defense response to virus;GO:00607…
ENSMUSG00000036986	1476	2824	2345	1076	1008	947	14.64	33.08	25.71	13.54	12.01	10.03	24.4766666666667	11.86	-1.04530308936771	7.97961254941433e-06	0.000282012059695818	Pml	promyelocytic leukemia [Source:MGI Symbol;Acc:MGI:104662]	Human Diseases;Human Diseases;Human Diseases;Cellular Processes;Human Diseases;Genetic Information Processing;Human Diseases	Cancers;Infectious diseases;Cancers;Transport and catabolism;Infectious diseases;Folding, sorting and degradation;Cancers	ko05200//Pathways in cancer;ko05168//Herpes simplex infection;ko05202//Transcriptional misregulation in cancers;ko04144//Endocytosis;ko05164//Influenza A;ko04120//Ubiquitin mediated proteolysis;ko05221//Acute myeloid leukemia	K10054;K10054;K10054;K10054;K10054;K10054;K10054	GO:0000784//nuclear chromosome, telomeric region;GO:0000792//heterochromatin;GO:0005634//nucleus;GO:0005654//nucleoplasm;GO:0005730//nucleolus;GO:0005737//cytoplasm;GO:0005768//endosome;GO:0005783//endoplasmic reticulum;GO:0005789//endoplasmic reticulum membrane;GO:0005829//cytosol;GO:0016020//membrane;GO:0016363//nuclear matrix;GO:0016605//PML body;GO:0031901//early endosome membrane;GO:0031965/…	GO:0003677//DNA binding;GO:0003713//transcription coactivator activity;GO:0005515//protein binding;GO:0008270//zinc ion binding;GO:0031625//ubiquitin protein ligase binding;GO:0032183//SUMO binding;GO:0042803//protein homodimerization activity;GO:0046332//SMAD binding;GO:0046872//metal ion binding;GO:0046982//protein heterodimerization activity;GO:0050897//cobalt ion binding	GO:0001666//response to hypoxia;GO:0001932//regulation of protein phosphorylation;GO:0002230//positive regulation of defense response to virus by host;GO:0002376//immune system process;GO:0006355//regulation of transcription, DNA-templated;GO:0006605//protein targeting;GO:0006606//protein import into nucleus;GO:0006915//apoptotic process;GO:0006919//activation of cysteine-type endopeptidase activ…
ENSMUSG00000024679	792	597	726	193	275	481	22.63	19.80	22.92	6.76	9.05	14.37	21.7833333333333	10.06	-1.11459443015611	8.60930148456626e-06	0.000302228759928066	Ms4a6d	membrane-spanning 4-domains, subfamily A, member 6D [Source:MGI Symbol;Acc:MGI:1916024]	-	-	-	-	GO:0016020//membrane;GO:0016021//integral component of membrane	-	-
ENSMUSG00000045322	364	586	530	179	254	262	4.21	7.88	6.78	2.56	3.41	3.19	6.29	3.05333333333333	-1.0426749195035	8.90606696208878e-06	0.00030987990069197	Tlr9	toll-like receptor 9 [Source:MGI Symbol;Acc:MGI:1932389]	Human Diseases;Human Diseases;Human Diseases;Human Diseases;Human Diseases;Human Diseases;Organismal Systems;Human Diseases;Human Diseases	Infectious diseases;Infectious diseases;Infectious diseases;Infectious diseases;Infectious diseases;Infectious diseases;Immune system;Cancer: overview;Infectious diseases	ko05168//Herpes simplex infection;ko05152//Tuberculosis;ko05132//Salmonella infection;ko05143//African trypanosomiasis;ko05162//Measles;ko05142//Chagas disease (American trypanosomiasis);ko04620//Toll-like receptor signaling pathway;ko05235//PD-L1 expression and PD-1 checkpoint pathway in cancer;ko05144//Malaria	K10161;K10161;K10161;K10161;K10161;K10161;K10161;K10161;K10161	GO:0005737//cytoplasm;GO:0005764//lysosome;GO:0005768//endosome;GO:0005783//endoplasmic reticulum;GO:0005789//endoplasmic reticulum membrane;GO:0005886//plasma membrane;GO:0016020//membrane;GO:0016021//integral component of membrane;GO:0016323//basolateral plasma membrane;GO:0016324//apical plasma membrane;GO:0031410//cytoplasmic vesicle;GO:0032009//early phagosome;GO:0036019//endolysosome;GO:004…	GO:0004888//transmembrane signaling receptor activity;GO:0005149//interleukin-1 receptor binding;GO:0005515//protein binding;GO:0035197//siRNA binding;GO:0038187//pattern recognition receptor activity;GO:0042803//protein homodimerization activity;GO:0045322//unmethylated CpG binding	GO:0001774//microglial cell activation;GO:0001816//cytokine production;GO:0001932//regulation of protein phosphorylation;GO:0002218//activation of innate immune response;GO:0002224//toll-like receptor signaling pathway;GO:0002237//response to molecule of bacterial origin;GO:0002376//immune system process;GO:0002639//positive regulation of immunoglobulin production;GO:0002730//regulation of dendri…
ENSMUSG00000060509	180	317	309	84	114	127	1.63	3.33	3.09	0.94	1.20	1.21	2.68333333333333	1.11666666666667	-1.26482768765684	9.11875956962772e-06	0.000314126770499928	Xcr1	chemokine (C motif) receptor 1 [Source:MGI Symbol;Acc:MGI:1346338]	Environmental Information Processing;Organismal Systems;Environmental Information Processing	Signaling molecules and interaction;Immune system;Signaling molecules and interaction	ko04060//Cytokine-cytokine receptor interaction;ko04062//Chemokine signaling pathway;ko04061//Viral protein interaction with cytokine and cytokine receptor	K04193;K04193;K04193	GO:0005623//cell;GO:0005886//plasma membrane;GO:0009897//external side of plasma membrane;GO:0016020//membrane;GO:0016021//integral component of membrane	GO:0004930//G-protein coupled receptor activity;GO:0004950//chemokine receptor activity;GO:0016493//C-C chemokine receptor activity;GO:0019956//chemokine binding;GO:0019957//C-C chemokine binding	GO:0006935//chemotaxis;GO:0006955//immune response;GO:0007165//signal transduction;GO:0007186//G-protein coupled receptor signaling pathway;GO:0007204//positive regulation of cytosolic calcium ion concentration;GO:0019722//calcium-mediated signaling;GO:0034097//response to cytokine;GO:0051209//release of sequestered calcium ion into cytosol;GO:0060326//cell chemotaxis;GO:0070098//chemokine-mediat…
ENSMUSG00000027326	142	200	175	60	88	70	0.85	1.37	1.17	0.43	0.61	0.43	1.13	0.49	-1.20546911829998	9.20240234017224e-06	0.000315996029702814	Knl1	kinetochore scaffold 1 [Source:MGI Symbol;Acc:MGI:1923714]	-	-	-	-	GO:0000775//chromosome, centromeric region;GO:0000776//kinetochore;GO:0000777//condensed chromosome kinetochore;GO:0001669//acrosomal vesicle;GO:0005634//nucleus;GO:0005654//nucleoplasm;GO:0005694//chromosome;GO:0016604//nuclear body	GO:0003674//molecular_function	GO:0007049//cell cycle;GO:0007059//chromosome segregation;GO:0008608//attachment of spindle microtubules to kinetochore;GO:0010923//negative regulation of phosphatase activity;GO:0034501//protein localization to kinetochore;GO:0051301//cell division
ENSMUSG00000026104	5102	9923	9508	2919	4062	4335	73.93	171.69	154.70	51.70	68.66	64.75	133.44	61.7033333333333	-1.11277086012795	9.43019156086298e-06	0.000322410049299331	Stat1	signal transducer and activator of transcription 1 [Source:MGI Symbol;Acc:MGI:103063]	Human Diseases;Human Diseases;Human Diseases;Human Diseases;Human Diseases;Organismal Systems;Human Diseases;Human Diseases;Organismal Systems;Human Diseases;Environmental Information Processing;Cellular Processes;Human Diseases;Human Diseases;Human Diseases;Organismal Systems;Organismal Systems;Organismal Systems;Human Diseases;Organismal Systems;Organismal Systems;Human Diseases;Organismal Syst…	Cancers;Infectious diseases;Infectious diseases;Infectious diseases;Infectious diseases;Immune system;Infectious diseases;Infectious diseases;Immune system;Infectious diseases;Signal transduction;Cell growth and death;Infectious diseases;Infectious diseases;Infectious diseases;Development;Endocrine system;Endocrine system;Infectious diseases;Immune system;Immune system;Endocrine and metabolic dis…	ko05200//Pathways in cancer;ko05168//Herpes simplex infection;ko05169//Epstein-Barr virus infection;ko05165//Human papillomavirus infection;ko05152//Tuberculosis;ko04621//NOD-like receptor signaling pathway;ko05167//Kaposi sarcoma-associated herpesvirus infection;ko05140//Leishmaniasis;ko04062//Chemokine signaling pathway;ko05164//Influenza A;ko04630//Jak-STAT signaling pathway;ko04217//Necroptos…	K11220;K11220;K11220;K11220;K11220;K11220;K11220;K11220;K11220;K11220;K11220;K11220;K11220;K11220;K11220;K11220;K11220;K11220;K11220;K11220;K11220;K11220;K11220;K11220;K11220;K11220;K11220;K11220	GO:0000790//nuclear chromatin;GO:0005634//nucleus;GO:0005654//nucleoplasm;GO:0005730//nucleolus;GO:0005737//cytoplasm;GO:0005829//cytosol;GO:0032991//macromolecular complex;GO:0048471//perinuclear region of cytoplasm	GO:0000978//RNA polymerase II core promoter proximal region sequence-specific DNA binding;GO:0000979//RNA polymerase II core promoter sequence-specific DNA binding;GO:0000981//RNA polymerase II transcription factor activity, sequence-specific DNA binding;GO:0003677//DNA binding;GO:0003690//double-stranded DNA binding;GO:0003700//transcription factor activity, sequence-specific DNA binding;GO:0005…	GO:0001937//negative regulation of endothelial cell proliferation;GO:0002230//positive regulation of defense response to virus by host;GO:0006355//regulation of transcription, DNA-templated;GO:0007165//signal transduction;GO:0007259//JAK-STAT cascade;GO:0010742//macrophage derived foam cell differentiation;GO:0016525//negative regulation of angiogenesis;GO:0032727//positive regulation of interfer…
ENSMUSG00000101389	171	107	155	56	50	76	8.24	5.99	8.24	3.33	2.79	3.85	7.49	3.32333333333333	-1.17233471478171	9.50946266109921e-06	0.000324415009264875	Ms4a4a	membrane-spanning 4-domains, subfamily A, member 4A [Source:MGI Symbol;Acc:MGI:3643932]	-	-	-	-	GO:0005575//cellular_component;GO:0016020//membrane;GO:0016021//integral component of membrane	GO:0003674//molecular_function	GO:0008150//biological_process
ENSMUSG00000078921	1432	2338	2630	546	958	1211	20.51	42.64	43.21	15.47	15.91	20.71	35.4533333333333	17.3633333333333	-1.02987734010697	9.62580259111282e-06	0.000327673154438163	Tgtp2	T cell specific GTPase 2 [Source:MGI Symbol;Acc:MGI:3710083]	Environmental Information Processing	Signal transduction	ko04668//TNF signaling pathway	K17072	GO:0005737//cytoplasm;GO:0005783//endoplasmic reticulum;GO:0005789//endoplasmic reticulum membrane;GO:0005794//Golgi apparatus;GO:0016020//membrane	GO:0000166//nucleotide binding;GO:0003924//GTPase activity;GO:0005525//GTP binding;GO:0016787//hydrolase activity	GO:0002376//immune system process;GO:0006952//defense response;GO:0006955//immune response;GO:0009615//response to virus;GO:0009617//response to bacterium;GO:0034341//response to interferon-gamma;GO:0035455//response to interferon-alpha;GO:0035458//cellular response to interferon-beta;GO:0045087//innate immune response
ENSMUSG00000094134	119	190	360	30	78	58	13.27	24.63	44.34	4.13	10.09	6.81	27.4133333333333	7.01	-1.9673914144621	1.08774971892244e-05	0.000365535039091735	Ighv5-15	immunoglobulin heavy variable 5-15 [Source:MGI Symbol;Acc:MGI:4439812]	Environmental Information Processing;Human Diseases;Human Diseases;Environmental Information Processing;Cellular Processes;Human Diseases;Human Diseases;Environmental Information Processing;Human Diseases;Human Diseases;Human Diseases;Environmental Information Processing;Organismal Systems;Human Diseases;Human Diseases;Organismal Systems;Organismal Systems;Human Diseases;Organismal Systems;Human …	Signal transduction;Infectious diseases;Infectious diseases;Signal transduction;Transport and catabolism;Cancers;Infectious diseases;Signal transduction;Immune diseases;Infectious diseases;Infectious diseases;Signal transduction;Immune system;Immune diseases;Cardiovascular diseases;Immune system;Immune system;Cardiovascular diseases;Immune system;Immune diseases;Infectious diseases;Immune system;…	ko04151//PI3K-Akt signaling pathway;ko05169//Epstein-Barr virus infection;ko05130//Pathogenic Escherichia coli infection;ko04020//Calcium signaling pathway;ko04145//Phagosome;ko05202//Transcriptional misregulation in cancers;ko05152//Tuberculosis;ko04072//Phospholipase D signaling pathway;ko05322//Systemic lupus erythematosus;ko05150//Staphylococcus aureus infection;ko05146//Amoebiasis;ko04064//N…	K06856;K06856;K06856;K06856;K06856;K06856;K06856;K06856;K06856;K06856;K06856;K06856;K06856;K06856;K06856;K06856;K06856;K06856;K06856;K06856;K06856;K06856;K06856;K06856;K06856;K06856;K06856	GO:0009897//external side of plasma membrane;GO:0042571//immunoglobulin complex, circulating	GO:0003823//antigen binding;GO:0034987//immunoglobulin receptor binding	GO:0006910//phagocytosis, recognition;GO:0006911//phagocytosis, engulfment;GO:0006958//complement activation, classical pathway;GO:0042742//defense response to bacterium;GO:0045087//innate immune response;GO:0050853//B cell receptor signaling pathway;GO:0050871//positive regulation of B cell activation
ENSMUSG00000049436	236	162	163	325	352	955	5.02	4.00	3.83	8.52	8.68	21.36	4.28333333333333	12.8533333333333	1.58533669214872	1.09659680866827e-05	0.000366939957657997	Upk1b	uroplakin 1B [Source:MGI Symbol;Acc:MGI:98912]	-	-	-	-	GO:0005887//integral component of plasma membrane;GO:0016020//membrane;GO:0016021//integral component of membrane;GO:0016324//apical plasma membrane	-	GO:0009617//response to bacterium;GO:0030855//epithelial cell differentiation
ENSMUSG00000089844	73	118	88	34	24	31	1.98	3.99	3.27	1.22	0.75	1.00	3.08	0.99	-1.63742992061529	1.22905111253308e-05	0.000401046601416506	A530032D15Rik	RIKEN cDNA A530032D15Rik gene [Source:MGI Symbol;Acc:MGI:3037746]	-	-	-	-	GO:0005575//cellular_component;GO:0005634//nucleus;GO:0016604//nuclear body	GO:0003674//molecular_function	GO:0008150//biological_process
ENSMUSG00000061578	86	151	42	17	17	23	0.26	0.54	0.14	0.06	0.06	0.07	0.313333333333333	0.0633333333333333	-2.30666133823405	1.30147906183857e-05	0.000421159695587145	Ksr2	kinase suppressor of ras 2 [Source:MGI Symbol;Acc:MGI:3610315]	Environmental Information Processing;Environmental Information Processing	Signal transduction;Signal transduction	ko04014//Ras signaling pathway;ko04013//MAPK signaling pathway - fly	K18529;K18529	-	GO:0000166//nucleotide binding;GO:0004672//protein kinase activity;GO:0005524//ATP binding;GO:0016301//kinase activity;GO:0016740//transferase activity;GO:0046872//metal ion binding	GO:0006468//protein phosphorylation;GO:0016310//phosphorylation;GO:0035556//intracellular signal transduction
ENSMUSG00000043496	455	190	381	664	691	761	3.42	1.66	3.16	6.15	6.02	6.01	2.74666666666667	6.06	1.14163595701089	1.32636991624665e-05	0.000428333052829795	Tril	TLR4 interactor with leucine-rich repeats [Source:MGI Symbol;Acc:MGI:1914123]	-	-	-	-	GO:0005615//extracellular space;GO:0016020//membrane;GO:0016021//integral component of membrane;GO:0031012//extracellular matrix;GO:0046696//lipopolysaccharide receptor complex	GO:0001530//lipopolysaccharide binding;GO:0005515//protein binding	GO:0002376//immune system process;GO:0002718//regulation of cytokine production involved in immune response;GO:0006954//inflammatory response;GO:0034142//toll-like receptor 4 signaling pathway;GO:0045087//innate immune response
ENSMUSG00000061086	1167	574	781	1090	1981	2347	52.19	29.79	38.55	60.16	102.71	110.49	40.1766666666667	91.12	1.18140987393941	1.46309494456304e-05	0.000467684841324043	Myl4	myosin, light polypeptide 4 [Source:MGI Symbol;Acc:MGI:97267]	Organismal Systems;Environmental Information Processing;Organismal Systems	Circulatory system;Signal transduction;Circulatory system	ko04261//Adrenergic signaling in cardiomyocytes;ko04371//Apelin signaling pathway;ko04260//Cardiac muscle contraction	K12750;K12750;K12750	GO:0031672//A band	GO:0003785//actin monomer binding;GO:0005509//calcium ion binding;GO:0051015//actin filament binding	GO:0002026//regulation of the force of heart contraction;GO:0032781//positive regulation of ATPase activity;GO:0060048//cardiac muscle contraction
ENSMUSG00000029657	459	556	360	110	224	246	5.29	11.09	6.04	2.05	4.09	3.79	7.47333333333333	3.31	-1.17492065527705	1.48295425136649e-05	0.000473071430248291	Hsph1	heat shock 105kDa/110kDa protein 1 [Source:MGI Symbol;Acc:MGI:105053]	Genetic Information Processing	Folding, sorting and degradation	ko04141//Protein processing in endoplasmic reticulum	K09485	GO:0005576//extracellular region;GO:0005634//nucleus;GO:0005654//nucleoplasm;GO:0005737//cytoplasm;GO:0005829//cytosol;GO:0005874//microtubule;GO:0032991//macromolecular complex	GO:0000166//nucleotide binding;GO:0000774//adenyl-nucleotide exchange factor activity;GO:0005515//protein binding;GO:0005524//ATP binding;GO:0043014//alpha-tubulin binding	GO:0006986//response to unfolded protein;GO:0043524//negative regulation of neuron apoptotic process;GO:0045345//positive regulation of MHC class I biosynthetic process;GO:0050790//regulation of catalytic activity;GO:0051085//chaperone mediated protein folding requiring cofactor;GO:0051135//positive regulation of NK T cell activation;GO:0070507//regulation of microtubule cytoskeleton organization
ENSMUSG00000029561	1480	3982	3614	730	761	762	29.58	100.14	78.77	17.62	16.48	15.46	69.4966666666667	16.52	-2.07273009541265	1.57450615301127e-05	0.000498234572804994	Oasl2	2'-5' oligoadenylate synthetase-like 2 [Source:MGI Symbol;Acc:MGI:1344390]	Human Diseases	Infectious diseases	ko05165//Human papillomavirus infection	K14608	GO:0005634//nucleus;GO:0005654//nucleoplasm;GO:0005829//cytosol;GO:0016020//membrane	GO:0000166//nucleotide binding;GO:0001730//2'-5'-oligoadenylate synthetase activity;GO:0003723//RNA binding;GO:0003725//double-stranded RNA binding;GO:0005515//protein binding;GO:0005524//ATP binding;GO:0016740//transferase activity;GO:0016779//nucleotidyltransferase activity;GO:0046872//metal ion binding	GO:0002376//immune system process;GO:0006164//purine nucleotide biosynthetic process;GO:0006955//immune response;GO:0009615//response to virus;GO:0045071//negative regulation of viral genome replication;GO:0045087//innate immune response;GO:0051607//defense response to virus;GO:0060700//regulation of ribonuclease activity
ENSMUSG00000054422	2	0	3	26	21	23	0.15	0.00	0.24	2.34	1.77	1.76	0.13	1.95666666666667	3.91181447424781	1.76124531413577e-05	0.000549585417766137	Fabp1	fatty acid binding protein 1, liver [Source:MGI Symbol;Acc:MGI:95479]	Organismal Systems;Organismal Systems	Endocrine system;Digestive system	ko03320//PPAR signaling pathway;ko04975//Fat digestion and absorption	K08750;K08750	GO:0005634//nucleus;GO:0005654//nucleoplasm;GO:0005737//cytoplasm;GO:0005782//peroxisomal matrix;GO:0005829//cytosol;GO:0032991//macromolecular complex;GO:0045179//apical cortex	GO:0003682//chromatin binding;GO:0005324//long-chain fatty acid transporter activity;GO:0005504//fatty acid binding;GO:0005543//phospholipid binding;GO:0008144//drug binding;GO:0008289//lipid binding;GO:0016209//antioxidant activity;GO:0032052//bile acid binding	GO:0015909//long-chain fatty acid transport;GO:0032000//positive regulation of fatty acid beta-oxidation;GO:0043066//negative regulation of apoptotic process;GO:0043154//negative regulation of cysteine-type endopeptidase activity involved in apoptotic process;GO:0050892//intestinal absorption;GO:0051345//positive regulation of hydrolase activity;GO:0070301//cellular response to hydrogen peroxide;…
ENSMUSG00000098488	1	0	0	9	38	25	0.01	0.00	0.00	0.17	0.63	0.37	0.00333333333333333	0.39	6.87036471958341	1.85498894995142e-05	0.000574279748344213	Pla2g4b	phospholipase A2, group IVB (cytosolic) [Source:MGI Symbol;Acc:MGI:2384819]	Metabolism;Environmental Information Processing;Environmental Information Processing;Environmental Information Processing;Organismal Systems;Organismal Systems;Cellular Processes;Organismal Systems;Organismal Systems;Organismal Systems;Organismal Systems;Organismal Systems;Organismal Systems;Metabolism;Human Diseases;Metabolism;Organismal Systems;Organismal Systems;Organismal Systems;Environmenta…	Global and overview maps;Signal transduction;Signal transduction;Signal transduction;Immune system;Immune system;Cell growth and death;Endocrine system;Nervous system;Circulatory system;Sensory system;Immune system;Nervous system;Lipid metabolism;Cancers;Lipid metabolism;Endocrine system;Endocrine system;Nervous system;Signal transduction;Lipid metabolism;Lipid metabolism;Lipid metabolism	ko01100//Metabolic pathways;ko04010//MAPK signaling pathway;ko04072//Phospholipase D signaling pathway;ko04014//Ras signaling pathway;ko04666//Fc gamma R-mediated phagocytosis;ko04664//Fc epsilon RI signaling pathway;ko04217//Necroptosis;ko04921//Oxytocin signaling pathway;ko04726//Serotonergic synapse;ko04270//Vascular smooth muscle contraction;ko04750//Inflammatory mediator regulation of TRP ch…	K16342;K16342;K16342;K16342;K16342;K16342;K16342;K16342;K16342;K16342;K16342;K16342;K16342;K16342;K16342;K16342;K16342;K16342;K16342;K16342;K16342;K16342;K16342	GO:0005737//cytoplasm	GO:0004620//phospholipase activity;GO:0004623//phospholipase A2 activity;GO:0005509//calcium ion binding;GO:0016787//hydrolase activity;GO:0046872//metal ion binding	GO:0006629//lipid metabolic process;GO:0009395//phospholipid catabolic process;GO:0016042//lipid catabolic process
ENSMUSG00000094117	524	390	1132	59	72	184	58.78	50.84	140.18	8.20	9.37	21.75	83.2666666666667	13.1066666666667	-2.66743825015474	1.92894443222807e-05	0.000592952867299059	Igkv3-12	immunoglobulin kappa variable 3-12 [Source:MGI Symbol;Acc:MGI:1330815]	-	-	-	-	GO:0005615//extracellular space	-	GO:0002377//immunoglobulin production;GO:0006955//immune response
ENSMUSG00000031430	39	39	54	9	10	13	1.04	1.02	1.33	0.22	0.31	0.20	1.13	0.243333333333333	-2.21531690425633	2.00514383436636e-05	0.000611141416338756	Vsig1	V-set and immunoglobulin domain containing 1 [Source:MGI Symbol;Acc:MGI:1926039]	-	-	-	-	GO:0005886//plasma membrane;GO:0016020//membrane;GO:0016021//integral component of membrane	-	GO:0003382//epithelial cell morphogenesis;GO:0030277//maintenance of gastrointestinal epithelium
ENSMUSG00000112148	393	194	148	64	58	113	11.52	6.58	5.14	2.29	1.97	3.48	7.74666666666667	2.58	-1.58620459726012	2.20648749982898e-05	0.000660979598282101	Lilrb4a	leukocyte immunoglobulin-like receptor, subfamily B, member 4A [Source:MGI Symbol;Acc:MGI:102701]	Organismal Systems;Organismal Systems	Immune system;Development	ko04662//B cell receptor signaling pathway;ko04380//Osteoclast differentiation	K06512;K06512	GO:0005886//plasma membrane;GO:0009897//external side of plasma membrane;GO:0016020//membrane;GO:0016021//integral component of membrane	-	GO:0001780//neutrophil homeostasis;GO:0002250//adaptive immune response;GO:0002376//immune system process;GO:0002437//inflammatory response to antigenic stimulus;GO:0006954//inflammatory response;GO:0007596//blood coagulation;GO:0009611//response to wounding;GO:0009624//response to nematode;GO:0009991//response to extracellular stimulus;GO:0032496//response to lipopolysaccharide;GO:0035739//CD4-p…
ENSMUSG00000076614	176114	162515	165979	16599	50721	15457	6586.02	7059.74	6854.07	765.36	2197.54	608.25	6833.27666666667	1190.38333333333	-2.52115130764092	2.29819583539229e-05	0.000685839201199517	Ighg1	immunoglobulin heavy constant gamma 1 (G1m marker) [Source:MGI Symbol;Acc:MGI:96446]	Environmental Information Processing;Human Diseases;Human Diseases;Environmental Information Processing;Cellular Processes;Human Diseases;Human Diseases;Environmental Information Processing;Human Diseases;Human Diseases;Human Diseases;Environmental Information Processing;Organismal Systems;Human Diseases;Human Diseases;Organismal Systems;Organismal Systems;Human Diseases;Organismal Systems;Human …	Signal transduction;Infectious diseases;Infectious diseases;Signal transduction;Transport and catabolism;Cancers;Infectious diseases;Signal transduction;Immune diseases;Infectious diseases;Infectious diseases;Signal transduction;Immune system;Immune diseases;Cardiovascular diseases;Immune system;Immune system;Cardiovascular diseases;Immune system;Immune diseases;Infectious diseases;Immune system;…	ko04151//PI3K-Akt signaling pathway;ko05169//Epstein-Barr virus infection;ko05130//Pathogenic Escherichia coli infection;ko04020//Calcium signaling pathway;ko04145//Phagosome;ko05202//Transcriptional misregulation in cancers;ko05152//Tuberculosis;ko04072//Phospholipase D signaling pathway;ko05322//Systemic lupus erythematosus;ko05150//Staphylococcus aureus infection;ko05146//Amoebiasis;ko04064//N…	K06856;K06856;K06856;K06856;K06856;K06856;K06856;K06856;K06856;K06856;K06856;K06856;K06856;K06856;K06856;K06856;K06856;K06856;K06856;K06856;K06856;K06856;K06856;K06856;K06856;K06856;K06856	GO:0016020//membrane;GO:0016021//integral component of membrane	-	-
ENSMUSG00000031489	52	90	94	143	224	210	0.88	1.76	1.84	3.06	4.77	3.85	1.49333333333333	3.89333333333333	1.38246963682242	2.35290913519317e-05	0.000699512324559224	Adrb3	adrenergic receptor, beta 3 [Source:MGI Symbol;Acc:MGI:87939]	Environmental Information Processing;Environmental Information Processing;Organismal Systems;Environmental Information Processing;Organismal Systems;Organismal Systems;Organismal Systems	Signaling molecules and interaction;Signal transduction;Environmental adaptation;Signal transduction;Digestive system;Endocrine system;Endocrine system	ko04080//Neuroactive ligand-receptor interaction;ko04020//Calcium signaling pathway;ko04714//Thermogenesis;ko04022//cGMP - PKG signaling pathway;ko04970//Salivary secretion;ko04924//Renin secretion;ko04923//Regulation of lipolysis in adipocyte	K04143;K04143;K04143;K04143;K04143;K04143;K04143	GO:0005634//nucleus;GO:0005886//plasma membrane;GO:0005887//integral component of plasma membrane;GO:0016020//membrane;GO:0016021//integral component of membrane;GO:0043235//receptor complex	GO:0004930//G-protein coupled receptor activity;GO:0004935//adrenergic receptor activity;GO:0004939//beta-adrenergic receptor activity;GO:0015052//beta3-adrenergic receptor activity;GO:0031699//beta-3 adrenergic receptor binding;GO:0042803//protein homodimerization activity;GO:0051379//epinephrine binding;GO:0051380//norepinephrine binding	GO:0001659//temperature homeostasis;GO:0002024//diet induced thermogenesis;GO:0002025//vasodilation by norepinephrine-epinephrine involved in regulation of systemic arterial blood pressure;GO:0007165//signal transduction;GO:0007186//G-protein coupled receptor signaling pathway;GO:0007188//adenylate cyclase-modulating G-protein coupled receptor signaling pathway;GO:0007189//adenylate cyclase-activ…
ENSMUSG00000074802	250	270	162	85	112	114	3.77	6.14	3.54	1.39	2.00	2.21	4.48333333333333	1.86666666666667	-1.26410744049902	2.43924697398249e-05	0.000722448910731123	Gas2l3	growth arrest-specific 2 like 3 [Source:MGI Symbol;Acc:MGI:1918780]	-	-	-	-	GO:0005856//cytoskeleton;GO:0015629//actin cytoskeleton;GO:0015630//microtubule cytoskeleton	GO:0003779//actin binding;GO:0005515//protein binding;GO:0008017//microtubule binding	GO:0000226//microtubule cytoskeleton organization;GO:0030036//actin cytoskeleton organization
ENSMUSG00000047787	18	29	15	50	69	92	0.12	0.23	0.11	0.42	0.55	0.66	0.153333333333333	0.543333333333333	1.82516619817407	2.63769944330181e-05	0.000773938416880738	Flrt1	fibronectin leucine rich transmembrane protein 1 [Source:MGI Symbol;Acc:MGI:3026647]	-	-	-	-	GO:0016020//membrane;GO:0016021//integral component of membrane	GO:0005515//protein binding	-
ENSMUSG00000004933	146	284	113	48	52	71	3.24	7.50	2.78	1.25	1.41	1.71	4.50666666666667	1.45666666666667	-1.62938996678158	2.69921928982347e-05	0.000789045014331853	Matk	megakaryocyte-associated tyrosine kinase [Source:MGI Symbol;Acc:MGI:99259]	Organismal Systems	Nervous system	ko04722//Neurotrophin signaling pathway	K08888	-	GO:0000166//nucleotide binding;GO:0004672//protein kinase activity;GO:0004713//protein tyrosine kinase activity;GO:0004715//non-membrane spanning protein tyrosine kinase activity;GO:0005515//protein binding;GO:0005524//ATP binding;GO:0016301//kinase activity;GO:0016740//transferase activity	GO:0006468//protein phosphorylation;GO:0016310//phosphorylation;GO:0018108//peptidyl-tyrosine phosphorylation
ENSMUSG00000020676	280	216	161	52	119	60	10.42	9.34	6.62	2.39	5.13	2.35	8.79333333333333	3.29	-1.41832257479515	3.44874787067153e-05	0.000979033533611032	Ccl11	chemokine (C-C motif) ligand 11 [Source:MGI Symbol;Acc:MGI:103576]	Environmental Information Processing;Organismal Systems;Human Diseases;Organismal Systems;Environmental Information Processing	Signaling molecules and interaction;Immune system;Immune diseases;Immune system;Signaling molecules and interaction	ko04060//Cytokine-cytokine receptor interaction;ko04062//Chemokine signaling pathway;ko05310//Asthma;ko04657//IL-17 signaling pathway;ko04061//Viral protein interaction with cytokine and cytokine receptor	K16597;K16597;K16597;K16597;K16597	GO:0005576//extracellular region;GO:0005615//extracellular space	GO:0005125//cytokine activity;GO:0008009//chemokine activity;GO:0031728//CCR3 chemokine receptor binding;GO:0046983//protein dimerization activity;GO:0048018//receptor agonist activity;GO:0048020//CCR chemokine receptor binding	GO:0001938//positive regulation of endothelial cell proliferation;GO:0002544//chronic inflammatory response;GO:0002548//monocyte chemotaxis;GO:0002551//mast cell chemotaxis;GO:0006935//chemotaxis;GO:0006954//inflammatory response;GO:0006955//immune response;GO:0007010//cytoskeleton organization;GO:0007015//actin filament organization;GO:0007186//G-protein coupled receptor signaling pathway;GO:000…
ENSMUSG00000031574	63	46	37	97	103	122	1.16	0.53	0.41	2.66	2.84	3.20	0.7	2.9	2.05062607306997	3.4629650060679e-05	0.000980267905643774	Star	steroidogenic acute regulatory protein [Source:MGI Symbol;Acc:MGI:102760]	Human Diseases;Organismal Systems;Organismal Systems;Organismal Systems;Organismal Systems	Endocrine and metabolic diseases;Endocrine system;Endocrine system;Endocrine system;Digestive system	ko04934//Cushing syndrome;ko04925//Aldosterone synthesis and secretion;ko04927//Cortisol synthesis and secretion;ko04913//Ovarian Steroidogenesis;ko04979//Cholesterol metabolism	K16931;K16931;K16931;K16931;K16931	GO:0005623//cell;GO:0005739//mitochondrion;GO:0005758//mitochondrial intermembrane space;GO:0005829//cytosol;GO:0030061//mitochondrial crista;GO:0043005//neuron projection;GO:0043025//neuronal cell body	GO:0008289//lipid binding;GO:0015485//cholesterol binding	GO:0006082//organic acid metabolic process;GO:0006694//steroid biosynthetic process;GO:0006699//bile acid biosynthetic process;GO:0006703//estrogen biosynthetic process;GO:0006869//lipid transport;GO:0007420//brain development;GO:0007584//response to nutrient;GO:0007623//circadian rhythm;GO:0008203//cholesterol metabolic process;GO:0008211//glucocorticoid metabolic process;GO:0008584//male gonad …
ENSMUSG00000094694	664	135	190	55	71	104	76.17	18.00	24.07	7.78	9.44	12.55	39.4133333333333	9.92333333333333	-1.98978704790811	3.50830100080745e-05	0.000990575401071792	Ighv1-9	immunoglobulin heavy variable V1-9 [Source:MGI Symbol;Acc:MGI:4439621]	Environmental Information Processing;Human Diseases;Human Diseases;Environmental Information Processing;Cellular Processes;Human Diseases;Human Diseases;Environmental Information Processing;Human Diseases;Human Diseases;Human Diseases;Environmental Information Processing;Organismal Systems;Human Diseases;Human Diseases;Organismal Systems;Organismal Systems;Human Diseases;Organismal Systems;Human …	Signal transduction;Infectious diseases;Infectious diseases;Signal transduction;Transport and catabolism;Cancers;Infectious diseases;Signal transduction;Immune diseases;Infectious diseases;Infectious diseases;Signal transduction;Immune system;Immune diseases;Cardiovascular diseases;Immune system;Immune system;Cardiovascular diseases;Immune system;Immune diseases;Infectious diseases;Immune system;…	ko04151//PI3K-Akt signaling pathway;ko05169//Epstein-Barr virus infection;ko05130//Pathogenic Escherichia coli infection;ko04020//Calcium signaling pathway;ko04145//Phagosome;ko05202//Transcriptional misregulation in cancers;ko05152//Tuberculosis;ko04072//Phospholipase D signaling pathway;ko05322//Systemic lupus erythematosus;ko05150//Staphylococcus aureus infection;ko05146//Amoebiasis;ko04064//N…	K06856;K06856;K06856;K06856;K06856;K06856;K06856;K06856;K06856;K06856;K06856;K06856;K06856;K06856;K06856;K06856;K06856;K06856;K06856;K06856;K06856;K06856;K06856;K06856;K06856;K06856;K06856	GO:0009897//external side of plasma membrane;GO:0042571//immunoglobulin complex, circulating	GO:0003823//antigen binding;GO:0034987//immunoglobulin receptor binding	GO:0006910//phagocytosis, recognition;GO:0006911//phagocytosis, engulfment;GO:0006958//complement activation, classical pathway;GO:0042742//defense response to bacterium;GO:0045087//innate immune response;GO:0050853//B cell receptor signaling pathway;GO:0050871//positive regulation of B cell activation
ENSMUSG00000047735	2518	5173	4228	2061	1767	1657	19.02	45.41	35.61	19.21	15.48	13.17	33.3466666666667	15.9533333333333	-1.06368466064248	3.74209628045453e-05	0.00104347425891327	Samd9l	sterile alpha motif domain containing 9-like [Source:MGI Symbol;Acc:MGI:1343184]	-	-	-	-	-	GO:0005515//protein binding	-
ENSMUSG00000078937	61	115	60	124	466	269	0.84	2.22	0.92	2.23	7.51	3.93	1.32666666666667	4.55666666666667	1.78017290706241	3.87430981473282e-05	0.00106896965712813	Cpt1b	carnitine palmitoyltransferase 1b, muscle [Source:MGI Symbol;Acc:MGI:1098297]	Organismal Systems;Environmental Information Processing;Human Diseases;Organismal Systems;Organismal Systems;Organismal Systems;Metabolism;Metabolism	Environmental adaptation;Signal transduction;Endocrine and metabolic diseases;Endocrine system;Endocrine system;Endocrine system;Global and overview maps;Lipid metabolism	ko04714//Thermogenesis;ko04152//AMPK signaling pathway;ko04931//Insulin resistance;ko04922//Glucagon signaling pathway;ko03320//PPAR signaling pathway;ko04920//Adipocytokine signaling pathway;ko01212//Fatty acid metabolism;ko00071//Fatty acid degradation	K19523;K19523;K19523;K19523;K19523;K19523;K19523;K19523	GO:0005739//mitochondrion;GO:0005741//mitochondrial outer membrane;GO:0016020//membrane;GO:0016021//integral component of membrane;GO:0043231//intracellular membrane-bounded organelle	GO:0004095//carnitine O-palmitoyltransferase activity;GO:0016740//transferase activity;GO:0016746//transferase activity, transferring acyl groups	GO:0006629//lipid metabolic process;GO:0006631//fatty acid metabolic process;GO:0006635//fatty acid beta-oxidation;GO:0009437//carnitine metabolic process;GO:0015909//long-chain fatty acid transport
ENSMUSG00000049719	24	56	8	0	1	1	0.77	2.08	0.28	0.00	0.04	0.03	1.04333333333333	0.0233333333333333	-5.48266392487501	4.04930924510675e-05	0.00110753889561381	Prss46	protease, serine 46 [Source:MGI Symbol;Acc:MGI:1921556]	-	-	-	-	GO:0005615//extracellular space;GO:0016020//membrane;GO:0016021//integral component of membrane	GO:0004252//serine-type endopeptidase activity;GO:0008233//peptidase activity;GO:0008236//serine-type peptidase activity;GO:0016787//hydrolase activity	GO:0006508//proteolysis
ENSMUSG00000025938	77	69	72	166	177	118	0.48	0.53	0.48	1.27	1.14	0.63	0.496666666666667	1.01333333333333	1.02875899298142	4.47195966324018e-05	0.00120635522510769	Slco5a1	solute carrier organic anion transporter family, member 5A1 [Source:MGI Symbol;Acc:MGI:2443431]	-	-	-	-	GO:0005886//plasma membrane;GO:0005887//integral component of plasma membrane;GO:0016020//membrane;GO:0016021//integral component of membrane;GO:0043231//intracellular membrane-bounded organelle	GO:0005515//protein binding;GO:0015347//sodium-independent organic anion transmembrane transporter activity	GO:0006811//ion transport;GO:0043252//sodium-independent organic anion transport;GO:0055085//transmembrane transport
ENSMUSG00000061451	151	128	145	205	240	432	1.60	1.50	1.61	2.54	2.80	6.09	1.57	3.81	1.2790264386017	4.91463562673257e-05	0.00131673721467842	Tmem151a	transmembrane protein 151A [Source:MGI Symbol;Acc:MGI:2147713]	-	-	-	-	GO:0005575//cellular_component;GO:0016020//membrane;GO:0016021//integral component of membrane	GO:0003674//molecular_function	GO:0008150//biological_process
ENSMUSG00000024112	316	254	200	70	152	83	1.83	1.45	1.08	0.56	0.97	0.43	1.45333333333333	0.653333333333333	-1.15347448066172	4.95039583376197e-05	0.00132406250472065	Cacna1h	calcium channel, voltage-dependent, T type, alpha 1H subunit [Source:MGI Symbol;Acc:MGI:1928842]	Environmental Information Processing;Environmental Information Processing;Human Diseases;Organismal Systems;Organismal Systems;Organismal Systems;Organismal Systems	Signal transduction;Signal transduction;Endocrine and metabolic diseases;Environmental adaptation;Endocrine system;Endocrine system;Endocrine system	ko04020//Calcium signaling pathway;ko04010//MAPK signaling pathway;ko04934//Cushing syndrome;ko04713//Circadian entrainment;ko04925//Aldosterone synthesis and secretion;ko04927//Cortisol synthesis and secretion;ko04929//GnRH secretion	K04855;K04855;K04855;K04855;K04855;K04855;K04855	GO:0005887//integral component of plasma membrane;GO:0005891//voltage-gated calcium channel complex;GO:0016020//membrane;GO:0016021//integral component of membrane	GO:0005216//ion channel activity;GO:0005244//voltage-gated ion channel activity;GO:0005245//voltage-gated calcium channel activity;GO:0008332//low voltage-gated calcium channel activity;GO:0097110//scaffold protein binding	GO:0006811//ion transport;GO:0019228//neuronal action potential;GO:0030317//sperm motility;GO:0032342//aldosterone biosynthetic process;GO:0032870//cellular response to hormone stimulus;GO:0034220//ion transmembrane transport;GO:0034651//cortisol biosynthetic process;GO:0035865//cellular response to potassium ion;GO:0042391//regulation of membrane potential;GO:0055085//transmembrane transport;GO:…
ENSMUSG00000028965	110	246	162	37	64	74	3.86	10.16	5.55	1.47	3.11	2.64	6.52333333333333	2.40666666666667	-1.43857301373963	4.97413421751798e-05	0.00132590184472721	Tnfrsf9	tumor necrosis factor receptor superfamily, member 9 [Source:MGI Symbol;Acc:MGI:1101059]	Environmental Information Processing	Signaling molecules and interaction	ko04060//Cytokine-cytokine receptor interaction	K05146	GO:0005615//extracellular space;GO:0009897//external side of plasma membrane;GO:0016020//membrane;GO:0016021//integral component of membrane	GO:0005515//protein binding;GO:0019955//cytokine binding;GO:0038023//signaling receptor activity;GO:0042802//identical protein binding	GO:0006915//apoptotic process;GO:0008285//negative regulation of cell proliferation;GO:0042127//regulation of cell proliferation;GO:2001180//negative regulation of interleukin-10 secretion;GO:2001183//negative regulation of interleukin-12 secretion
ENSMUSG00000018986	68	151	149	37	45	32	1.42	3.52	3.37	0.93	1.03	0.69	2.77	0.883333333333333	-1.64885611731978	5.18811754958434e-05	0.00136672570690641	Slfn3	schlafen 3 [Source:MGI Symbol;Acc:MGI:1329005]	-	-	-	-	-	-	GO:0008285//negative regulation of cell proliferation
ENSMUSG00000074852	130	174	141	56	80	69	1.24	1.92	1.48	0.66	0.88	0.69	1.54666666666667	0.743333333333333	-1.05708109520727	5.41212601449567e-05	0.00141860843049956	Hpse2	heparanase 2 [Source:MGI Symbol;Acc:MGI:2685814]	Metabolism;Human Diseases;Metabolism	Global and overview maps;Cancers;Glycan biosynthesis and metabolism	ko01100//Metabolic pathways;ko05205//Proteoglycans in cancer;ko00531//Glycosaminoglycan degradation	K07965;K07965;K07965	GO:0005576//extracellular region;GO:0016020//membrane;GO:0031012//extracellular matrix	GO:0016798//hydrolase activity, acting on glycosyl bonds;GO:0043395//heparan sulfate proteoglycan binding	GO:0008284//positive regulation of cell proliferation;GO:0030198//extracellular matrix organization
ENSMUSG00000047462	101	126	111	39	60	43	1.47	2.13	1.79	0.70	1.01	0.66	1.79666666666667	0.79	-1.18539821385425	5.53731690588008e-05	0.0014418109764698	Gpr141b	G protein-coupled receptor 141B [Source:MGI Symbol;Acc:MGI:2441809]	-	-	-	-	GO:0005575//cellular_component;GO:0016020//membrane;GO:0016021//integral component of membrane	GO:0004930//G-protein coupled receptor activity	GO:0007186//G-protein coupled receptor signaling pathway
ENSMUSG00000090272	407	920	674	313	270	239	14.16	38.07	25.65	12.42	10.02	8.52	25.96	10.32	-1.33084741257588	5.66528061780914e-05	0.00146334343450422	Mndal	myeloid nuclear differentiation antigen like [Source:MGI Symbol;Acc:MGI:3780953]	Organismal Systems	Immune system	ko04621//NOD-like receptor signaling pathway	K20914	GO:0005634//nucleus;GO:0005654//nucleoplasm;GO:0005730//nucleolus;GO:0005829//cytosol	GO:0000978//RNA polymerase II core promoter proximal region sequence-specific DNA binding;GO:0001227//transcriptional repressor activity, RNA polymerase II transcription regulatory region sequence-specific binding;GO:0003674//molecular_function;GO:0003690//double-stranded DNA binding;GO:0008134//transcription factor binding;GO:0042802//identical protein binding	GO:0000122//negative regulation of transcription from RNA polymerase II promoter;GO:0002218//activation of innate immune response;GO:0009617//response to bacterium;GO:0030308//negative regulation of cell growth;GO:0032731//positive regulation of interleukin-1 beta production;GO:0035458//cellular response to interferon-beta;GO:0040008//regulation of growth
ENSMUSG00000042677	310	280	386	94	187	185	4.53	4.76	6.23	1.70	3.17	2.85	5.17333333333333	2.57333333333333	-1.00745580491905	5.73417573449447e-05	0.00147596369519467	Zc3h12a	zinc finger CCCH type containing 12A [Source:MGI Symbol;Acc:MGI:2385891]	-	-	-	-	GO:0000932//cytoplasmic mRNA processing body;GO:0005634//nucleus;GO:0005654//nucleoplasm;GO:0005737//cytoplasm;GO:0005783//endoplasmic reticulum;GO:0005791//rough endoplasmic reticulum;GO:0005856//cytoskeleton;GO:0016020//membrane;GO:0030867//rough endoplasmic reticulum membrane;GO:0032991//macromolecular complex;GO:0036464//cytoplasmic ribonucleoprotein granule;GO:0042406//extrinsic component of…	GO:0003677//DNA binding;GO:0003682//chromatin binding;GO:0003723//RNA binding;GO:0003729//mRNA binding;GO:0003730//mRNA 3'-UTR binding;GO:0004518//nuclease activity;GO:0004519//endonuclease activity;GO:0004521//endoribonuclease activity;GO:0004532//exoribonuclease activity;GO:0004540//ribonuclease activity;GO:0004843//thiol-dependent ubiquitin-specific protease activity;GO:0005515//protein bindin…	GO:0000294//nuclear-transcribed mRNA catabolic process, endonucleolytic cleavage-dependent decay;GO:0001525//angiogenesis;GO:0001933//negative regulation of protein phosphorylation;GO:0002230//positive regulation of defense response to virus by host;GO:0002376//immune system process;GO:0002757//immune response-activating signal transduction;GO:0006915//apoptotic process;GO:0006954//inflammatory r…
ENSMUSG00000046245	214	105	246	369	332	557	3.34	2.02	5.12	7.30	6.18	9.64	3.49333333333333	7.70666666666667	1.14150268096323	5.87120429472919e-05	0.00149896801855854	Pilra	paired immunoglobin-like type 2 receptor alpha [Source:MGI Symbol;Acc:MGI:2450529]	Human Diseases	Infectious diseases	ko05168//Herpes simplex infection	K15411	GO:0016020//membrane;GO:0016021//integral component of membrane	GO:0005515//protein binding;GO:0042288//MHC class I protein binding	GO:0007165//signal transduction
ENSMUSG00000051726	22	23	35	90	82	59	0.18	0.22	0.32	0.93	0.80	0.52	0.24	0.75	1.64385618977472	6.11421595114583e-05	0.00154613007988301	Kcnf1	potassium voltage-gated channel, subfamily F, member 1 [Source:MGI Symbol;Acc:MGI:2687399]	-	-	-	-	GO:0008076//voltage-gated potassium channel complex;GO:0016020//membrane;GO:0016021//integral component of membrane	GO:0005216//ion channel activity;GO:0005244//voltage-gated ion channel activity;GO:0005249//voltage-gated potassium channel activity;GO:0005267//potassium channel activity	GO:0006811//ion transport;GO:0006813//potassium ion transport;GO:0034765//regulation of ion transmembrane transport;GO:0051260//protein homooligomerization;GO:0055085//transmembrane transport;GO:0071805//potassium ion transmembrane transport
ENSMUSG00000029372	112	69	150	192	231	283	4.16	2.98	6.16	8.81	9.96	11.07	4.43333333333333	9.94666666666667	1.16582128986669	6.12871062435436e-05	0.00154713052952201	Ppbp	pro-platelet basic protein [Source:MGI Symbol;Acc:MGI:1888712]	Environmental Information Processing;Organismal Systems;Environmental Information Processing	Signaling molecules and interaction;Immune system;Signaling molecules and interaction	ko04060//Cytokine-cytokine receptor interaction;ko04062//Chemokine signaling pathway;ko04061//Viral protein interaction with cytokine and cytokine receptor	K10029;K10029;K10029	GO:0005576//extracellular region;GO:0005615//extracellular space	GO:0008009//chemokine activity;GO:0045236//CXCR chemokine receptor binding	GO:0002523//leukocyte migration involved in inflammatory response;GO:0006935//chemotaxis;GO:0006952//defense response;GO:0006954//inflammatory response;GO:0006955//immune response;GO:0030593//neutrophil chemotaxis;GO:0030595//leukocyte chemotaxis;GO:0070098//chemokine-mediated signaling pathway;GO:0071222//cellular response to lipopolysaccharide
ENSMUSG00000023341	243	1126	831	126	126	94	4.93	25.00	17.10	2.84	2.75	2.00	15.6766666666667	2.53	-2.63140954144252	6.95505955286261e-05	0.00170377292192944	Mx2	MX dynamin-like GTPase 2 [Source:MGI Symbol;Acc:MGI:97244]	Human Diseases;Human Diseases;Human Diseases;Human Diseases	Infectious diseases;Infectious diseases;Infectious diseases;Infectious diseases	ko05165//Human papillomavirus infection;ko05164//Influenza A;ko05160//Hepatitis C;ko05162//Measles	K14754;K14754;K14754;K14754	GO:0005634//nucleus;GO:0005737//cytoplasm;GO:0005886//plasma membrane;GO:0014069//postsynaptic density;GO:0015630//microtubule cytoskeleton;GO:0016020//membrane;GO:0030424//axon;GO:0031410//cytoplasmic vesicle;GO:0031966//mitochondrial membrane;GO:0043197//dendritic spine;GO:0044327//dendritic spine head;GO:0045202//synapse;GO:0045211//postsynaptic membrane;GO:0098793//presynapse;GO:0098844//post…	GO:0000166//nucleotide binding;GO:0003924//GTPase activity;GO:0005525//GTP binding;GO:0008017//microtubule binding	GO:0000266//mitochondrial fission;GO:0002376//immune system process;GO:0009615//response to virus;GO:0016185//synaptic vesicle budding from presynaptic endocytic zone membrane;GO:0031623//receptor internalization;GO:0034340//response to type I interferon;GO:0045071//negative regulation of viral genome replication;GO:0045087//innate immune response;GO:0048285//organelle fission;GO:0050803//regulat…
ENSMUSG00000096715	123	218	246	21	69	82	13.76	28.33	30.38	2.90	8.95	9.65	24.1566666666667	7.16666666666667	-1.75304723450792	7.5916141219011e-05	0.00182838155122724	Igkv3-4	immunoglobulin kappa variable 3-4 [Source:MGI Symbol;Acc:MGI:1330855]	-	-	-	-	GO:0005615//extracellular space	-	GO:0002377//immunoglobulin production;GO:0006955//immune response
ENSMUSG00000045551	212	38	165	428	344	575	6.45	1.34	5.54	16.06	12.13	18.40	4.44333333333333	15.53	1.80534355001949	7.74561516478694e-05	0.00185411399842624	Fpr1	formyl peptide receptor 1 [Source:MGI Symbol;Acc:MGI:107443]	Environmental Information Processing;Human Diseases;Environmental Information Processing	Signaling molecules and interaction;Infectious diseases;Signal transduction	ko04080//Neuroactive ligand-receptor interaction;ko05150//Staphylococcus aureus infection;ko04015//Rap1 signaling pathway	K04172;K04172;K04172	GO:0005623//cell;GO:0005737//cytoplasm;GO:0005886//plasma membrane;GO:0016020//membrane;GO:0016021//integral component of membrane	GO:0001664//G-protein coupled receptor binding;GO:0004875//complement receptor activity;GO:0004930//G-protein coupled receptor activity;GO:0004982//N-formyl peptide receptor activity;GO:0005124//scavenger receptor binding;GO:0050786//RAGE receptor binding	GO:0002430//complement receptor mediated signaling pathway;GO:0006935//chemotaxis;GO:0006954//inflammatory response;GO:0007165//signal transduction;GO:0007186//G-protein coupled receptor signaling pathway;GO:0007200//phospholipase C-activating G-protein coupled receptor signaling pathway;GO:0007204//positive regulation of cytosolic calcium ion concentration
ENSMUSG00000040197	49	62	58	11	24	15	1.09	1.61	1.43	0.30	0.62	0.35	1.37666666666667	0.423333333333333	-1.70131328464728	8.2479288519757e-05	0.00194767533115648	Cd209e	CD209e antigen [Source:MGI Symbol;Acc:MGI:2157948]	Cellular Processes;Human Diseases;Human Diseases;Organismal Systems	Transport and catabolism;Infectious diseases;Infectious diseases;Immune system	ko04145//Phagosome;ko05152//Tuberculosis;ko05162//Measles;ko04625//C-type lectin receptor signaling pathway	K06563;K06563;K06563;K06563	GO:0005886//plasma membrane;GO:0009897//external side of plasma membrane;GO:0016020//membrane;GO:0016021//integral component of membrane	GO:0005537//mannose binding;GO:0030246//carbohydrate binding	GO:0006897//endocytosis;GO:0042102//positive regulation of T cell proliferation;GO:0097323//B cell adhesion
ENSMUSG00000071656	76	60	62	99	134	222	1.20	1.09	1.08	1.97	2.48	3.70	1.12333333333333	2.71666666666667	1.27405146793659	8.36159320456657e-05	0.0019598029259049	Lrrn4cl	LRRN4 C-terminal like [Source:MGI Symbol;Acc:MGI:1916102]	-	-	-	-	GO:0005575//cellular_component;GO:0016020//membrane;GO:0016021//integral component of membrane	GO:0003674//molecular_function;GO:0005515//protein binding	GO:0008150//biological_process
ENSMUSG00000093894	91	90	335	21	51	42	10.44	12.04	42.43	2.97	6.78	5.05	21.6366666666667	4.93333333333333	-2.13284358032162	8.43756423771082e-05	0.00197466626140592	Ighv1-53	immunoglobulin heavy variable 1-53 [Source:MGI Symbol;Acc:MGI:3576502]	Environmental Information Processing;Human Diseases;Human Diseases;Environmental Information Processing;Cellular Processes;Human Diseases;Human Diseases;Environmental Information Processing;Human Diseases;Human Diseases;Human Diseases;Environmental Information Processing;Organismal Systems;Human Diseases;Human Diseases;Organismal Systems;Organismal Systems;Human Diseases;Organismal Systems;Human …	Signal transduction;Infectious diseases;Infectious diseases;Signal transduction;Transport and catabolism;Cancers;Infectious diseases;Signal transduction;Immune diseases;Infectious diseases;Infectious diseases;Signal transduction;Immune system;Immune diseases;Cardiovascular diseases;Immune system;Immune system;Cardiovascular diseases;Immune system;Immune diseases;Infectious diseases;Immune system;…	ko04151//PI3K-Akt signaling pathway;ko05169//Epstein-Barr virus infection;ko05130//Pathogenic Escherichia coli infection;ko04020//Calcium signaling pathway;ko04145//Phagosome;ko05202//Transcriptional misregulation in cancers;ko05152//Tuberculosis;ko04072//Phospholipase D signaling pathway;ko05322//Systemic lupus erythematosus;ko05150//Staphylococcus aureus infection;ko05146//Amoebiasis;ko04064//N…	K06856;K06856;K06856;K06856;K06856;K06856;K06856;K06856;K06856;K06856;K06856;K06856;K06856;K06856;K06856;K06856;K06856;K06856;K06856;K06856;K06856;K06856;K06856;K06856;K06856;K06856;K06856	GO:0009897//external side of plasma membrane;GO:0042571//immunoglobulin complex, circulating	GO:0003823//antigen binding;GO:0034987//immunoglobulin receptor binding	GO:0006910//phagocytosis, recognition;GO:0006911//phagocytosis, engulfment;GO:0006958//complement activation, classical pathway;GO:0042742//defense response to bacterium;GO:0045087//innate immune response;GO:0050853//B cell receptor signaling pathway;GO:0050871//positive regulation of B cell activation
ENSMUSG00000043939	77	60	77	24	24	36	1.78	1.57	1.91	0.60	0.65	0.86	1.75333333333333	0.703333333333333	-1.31781980058512	9.07876602888063e-05	0.0020966483602967	A530064D06Rik	RIKEN cDNA A530064D06 gene [Source:MGI Symbol;Acc:MGI:2443476]	-	-	-	-	GO:0009986//cell surface;GO:0016020//membrane;GO:0016021//integral component of membrane	GO:0005515//protein binding;GO:0038023//signaling receptor activity	GO:0045088//regulation of innate immune response
ENSMUSG00000096638	1876	5955	7739	245	469	1222	208.67	769.72	950.59	33.62	60.49	143.03	642.993333333333	79.0466666666667	-3.02402724780963	9.26287755678759e-05	0.00213290300637772	Ighv2-9	immunoglobulin heavy variable 2-9 [Source:MGI Symbol;Acc:MGI:4439624]	Environmental Information Processing;Human Diseases;Human Diseases;Environmental Information Processing;Cellular Processes;Human Diseases;Human Diseases;Environmental Information Processing;Human Diseases;Human Diseases;Human Diseases;Environmental Information Processing;Organismal Systems;Human Diseases;Human Diseases;Organismal Systems;Organismal Systems;Human Diseases;Organismal Systems;Human …	Signal transduction;Infectious diseases;Infectious diseases;Signal transduction;Transport and catabolism;Cancers;Infectious diseases;Signal transduction;Immune diseases;Infectious diseases;Infectious diseases;Signal transduction;Immune system;Immune diseases;Cardiovascular diseases;Immune system;Immune system;Cardiovascular diseases;Immune system;Immune diseases;Infectious diseases;Immune system;…	ko04151//PI3K-Akt signaling pathway;ko05169//Epstein-Barr virus infection;ko05130//Pathogenic Escherichia coli infection;ko04020//Calcium signaling pathway;ko04145//Phagosome;ko05202//Transcriptional misregulation in cancers;ko05152//Tuberculosis;ko04072//Phospholipase D signaling pathway;ko05322//Systemic lupus erythematosus;ko05150//Staphylococcus aureus infection;ko05146//Amoebiasis;ko04064//N…	K06856;K06856;K06856;K06856;K06856;K06856;K06856;K06856;K06856;K06856;K06856;K06856;K06856;K06856;K06856;K06856;K06856;K06856;K06856;K06856;K06856;K06856;K06856;K06856;K06856;K06856;K06856	GO:0009897//external side of plasma membrane;GO:0042571//immunoglobulin complex, circulating	GO:0003823//antigen binding;GO:0034987//immunoglobulin receptor binding	GO:0006910//phagocytosis, recognition;GO:0006911//phagocytosis, engulfment;GO:0006958//complement activation, classical pathway;GO:0042742//defense response to bacterium;GO:0045087//innate immune response;GO:0050853//B cell receptor signaling pathway;GO:0050871//positive regulation of B cell activation
ENSMUSG00000034783	82	113	116	37	50	44	2.17	3.47	3.39	1.21	1.53	1.22	3.01	1.32	-1.18922555740125	9.29339786514784e-05	0.0021368021670348	Cd207	CD207 antigen [Source:MGI Symbol;Acc:MGI:2180021]	-	-	-	-	GO:0005887//integral component of plasma membrane;GO:0016020//membrane;GO:0016021//integral component of membrane	GO:0030246//carbohydrate binding	GO:0051607//defense response to virus
ENSMUSG00000032690	306	1321	1174	129	202	133	3.27	15.93	13.84	1.65	2.43	1.53	11.0133333333333	1.87	-2.55814101081065	9.75052163862012e-05	0.00221737521063147	Oas2	2'-5' oligoadenylate synthetase 2 [Source:MGI Symbol;Acc:MGI:2180852]	Human Diseases;Human Diseases;Organismal Systems;Human Diseases;Human Diseases;Human Diseases	Infectious diseases;Infectious diseases;Immune system;Infectious diseases;Infectious diseases;Infectious diseases	ko05168//Herpes simplex infection;ko05169//Epstein-Barr virus infection;ko04621//NOD-like receptor signaling pathway;ko05164//Influenza A;ko05160//Hepatitis C;ko05162//Measles	K14216;K14216;K14216;K14216;K14216;K14216	GO:0005634//nucleus;GO:0005654//nucleoplasm;GO:0005737//cytoplasm;GO:0005829//cytosol;GO:0016020//membrane;GO:0048471//perinuclear region of cytoplasm	GO:0000166//nucleotide binding;GO:0001730//2'-5'-oligoadenylate synthetase activity;GO:0003723//RNA binding;GO:0003725//double-stranded RNA binding;GO:0005524//ATP binding;GO:0016740//transferase activity;GO:0016779//nucleotidyltransferase activity;GO:0046872//metal ion binding	GO:0002376//immune system process;GO:0006401//RNA catabolic process;GO:0006955//immune response;GO:0009615//response to virus;GO:0009617//response to bacterium;GO:0045071//negative regulation of viral genome replication;GO:0045087//innate immune response;GO:0051607//defense response to virus;GO:0060337//type I interferon signaling pathway;GO:0060700//regulation of ribonuclease activity;GO:1903487…
ENSMUSG00000020638	680	1924	1889	365	409	405	8.56	28.25	26.59	5.67	5.97	5.36	21.1333333333333	5.66666666666667	-1.8989480940017	9.80567411052674e-05	0.00222210139389415	Cmpk2	cytidine monophosphate (UMP-CMP) kinase 2, mitochondrial [Source:MGI Symbol;Acc:MGI:99830]	Metabolism;Metabolism	Global and overview maps;Nucleotide metabolism	ko01100//Metabolic pathways;ko00240//Pyrimidine metabolism	K13809;K13809	GO:0005737//cytoplasm;GO:0005739//mitochondrion	GO:0000166//nucleotide binding;GO:0004127//cytidylate kinase activity;GO:0004550//nucleoside diphosphate kinase activity;GO:0004798//thymidylate kinase activity;GO:0005524//ATP binding;GO:0009041//uridylate kinase activity;GO:0016301//kinase activity;GO:0016740//transferase activity;GO:0033862//UMP kinase activity;GO:0050145//nucleoside phosphate kinase activity	GO:0006165//nucleoside diphosphate phosphorylation;GO:0006221//pyrimidine nucleotide biosynthetic process;GO:0006227//dUDP biosynthetic process;GO:0006233//dTDP biosynthetic process;GO:0006235//dTTP biosynthetic process;GO:0009142//nucleoside triphosphate biosynthetic process;GO:0016310//phosphorylation;GO:0046940//nucleoside monophosphate phosphorylation;GO:0071222//cellular response to lipopoly…
ENSMUSG00000030361	33	70	49	11	7	17	1.06	2.67	1.71	0.54	0.35	0.58	1.81333333333333	0.49	-1.88779049641397	0.000100970417931986	0.00228483706880049	Klrb1a	killer cell lectin-like receptor subfamily B member 1A [Source:MGI Symbol;Acc:MGI:107540]	Human Diseases	Infectious diseases	ko05144//Malaria	K06543	GO:0016020//membrane;GO:0016021//integral component of membrane	GO:0030246//carbohydrate binding	-
ENSMUSG00000028197	71	254	53	19	25	32	0.40	1.66	0.33	0.13	0.23	0.19	0.796666666666667	0.183333333333333	-2.11950709445609	0.00010260162012197	0.00231508705833318	Col24a1	collagen, type XXIV, alpha 1 [Source:MGI Symbol;Acc:MGI:1918605]	Organismal Systems	Digestive system	ko04974//Protein digestion and absorption	K19721	GO:0005576//extracellular region;GO:0005581//collagen trimer;GO:0005615//extracellular space;GO:0031012//extracellular matrix	GO:0005201//extracellular matrix structural constituent;GO:0030020//extracellular matrix structural constituent conferring tensile strength	GO:0001501//skeletal system development;GO:0002244//hematopoietic progenitor cell differentiation;GO:0030198//extracellular matrix organization;GO:0030199//collagen fibril organization;GO:0030903//notochord development
ENSMUSG00000049556	21	19	19	42	56	62	0.26	0.31	0.32	0.78	0.96	1.00	0.296666666666667	0.913333333333333	1.62229865199413	0.000105931528161019	0.00236982239457801	Lingo1	leucine rich repeat and Ig domain containing 1 [Source:MGI Symbol;Acc:MGI:1915522]	-	-	-	-	GO:0005615//extracellular space;GO:0005886//plasma membrane;GO:0016020//membrane;GO:0016021//integral component of membrane;GO:0031012//extracellular matrix	GO:0005154//epidermal growth factor receptor binding;GO:0005515//protein binding	GO:0021954//central nervous system neuron development;GO:0031175//neuron projection development;GO:0043491//protein kinase B signaling;GO:0048715//negative regulation of oligodendrocyte differentiation
ENSMUSG00000069310	249	265	251	72	157	137	15.90	19.68	17.74	5.71	11.65	9.23	17.7733333333333	8.86333333333333	-1.0037930032313	0.000106140593980011	0.00237112659307335	H3c3	H3 clustered histone 3 [Source:MGI Symbol;Acc:MGI:2448320]	Human Diseases;Human Diseases;Human Diseases;Human Diseases	Cancers;Immune diseases;Infectious diseases;Substance dependence	ko05202//Transcriptional misregulation in cancers;ko05322//Systemic lupus erythematosus;ko05131//Shigellosis;ko05034//Alcoholism	K11253;K11253;K11253;K11253	GO:0000228//nuclear chromosome;GO:0000785//chromatin;GO:0000786//nucleosome;GO:0000788//nuclear nucleosome;GO:0005634//nucleus;GO:0005654//nucleoplasm;GO:0005694//chromosome;GO:0032991//macromolecular complex	GO:0003677//DNA binding;GO:0003682//chromatin binding;GO:0005515//protein binding;GO:0046982//protein heterodimerization activity	GO:0000122//negative regulation of transcription from RNA polymerase II promoter;GO:0006334//nucleosome assembly;GO:0006335//DNA replication-dependent nucleosome assembly;GO:0060968//regulation of gene silencing
ENSMUSG00000036887	2128	2188	2419	536	898	1690	82.39	98.44	103.42	25.60	40.31	68.85	94.75	44.92	-1.07676801554522	0.000115802214721902	0.00255779869935275	C1qa	complement component 1, q subcomponent, alpha polypeptide [Source:MGI Symbol;Acc:MGI:88223]	Human Diseases;Human Diseases;Human Diseases;Organismal Systems;Human Diseases;Human Diseases	Immune diseases;Infectious diseases;Infectious diseases;Immune system;Infectious diseases;Neurodegenerative diseases	ko05322//Systemic lupus erythematosus;ko05150//Staphylococcus aureus infection;ko05142//Chagas disease (American trypanosomiasis);ko04610//Complement and coagulation cascades;ko05133//Pertussis;ko05020//Prion diseases	K03986;K03986;K03986;K03986;K03986;K03986	GO:0005576//extracellular region;GO:0005581//collagen trimer;GO:0005615//extracellular space;GO:0005623//cell;GO:0045202//synapse;GO:0098794//postsynapse	GO:0005515//protein binding	GO:0001774//microglial cell activation;GO:0002376//immune system process;GO:0006958//complement activation, classical pathway;GO:0007568//aging;GO:0010039//response to iron ion;GO:0016322//neuron remodeling;GO:0045087//innate immune response;GO:0048143//astrocyte activation;GO:0050808//synapse organization;GO:1901216//positive regulation of neuron death
ENSMUSG00000079362	1414	3437	3812	438	792	941	13.21	37.31	39.33	5.05	8.58	9.25	29.95	7.62666666666667	-1.97343145161891	0.000115960480233898	0.00255779869935275	Gm43302	predicted gene 43302 [Source:MGI Symbol;Acc:MGI:5663439]	-	-	-	-	GO:0020005//symbiont-containing vacuole membrane;GO:0031410//cytoplasmic vesicle	GO:0000166//nucleotide binding;GO:0003924//GTPase activity;GO:0005525//GTP binding	GO:0006955//immune response;GO:0042742//defense response to bacterium;GO:0042832//defense response to protozoan;GO:0050830//defense response to Gram-positive bacterium;GO:0071346//cellular response to interferon-gamma
ENSMUSG00000091898	157	55	91	176	253	289	8.80	3.60	5.61	12.13	16.38	17.14	6.00333333333333	15.2166666666667	1.34181667896531	0.000117157376967556	0.00257496517413068	Tnnc1	troponin C, cardiac/slow skeletal [Source:MGI Symbol;Acc:MGI:98779]	Environmental Information Processing;Human Diseases;Organismal Systems;Human Diseases;Organismal Systems	Signal transduction;Cardiovascular diseases;Circulatory system;Cardiovascular diseases;Circulatory system	ko04020//Calcium signaling pathway;ko05414//Dilated cardiomyopathy (DCM);ko04261//Adrenergic signaling in cardiomyocytes;ko05410//Hypertrophic cardiomyopathy (HCM);ko04260//Cardiac muscle contraction	K05865;K05865;K05865;K05865;K05865	GO:0005861//troponin complex;GO:0043292//contractile fiber;GO:1990584//cardiac Troponin complex	GO:0005509//calcium ion binding;GO:0031013//troponin I binding;GO:0031014//troponin T binding;GO:0042803//protein homodimerization activity;GO:0046872//metal ion binding;GO:0048306//calcium-dependent protein binding;GO:0051015//actin filament binding	GO:0002086//diaphragm contraction;GO:0003009//skeletal muscle contraction;GO:0006937//regulation of muscle contraction;GO:0010038//response to metal ion;GO:0014883//transition between fast and slow fiber;GO:0032972//regulation of muscle filament sliding speed;GO:0043462//regulation of ATPase activity;GO:0055010//ventricular cardiac muscle tissue morphogenesis;GO:0060048//cardiac muscle contraction
ENSMUSG00000030124	77	86	90	13	41	28	1.55	2.01	2.00	0.32	0.96	0.59	1.85333333333333	0.623333333333333	-1.57204661283587	0.000117393656123336	0.00257496517413068	Lag3	lymphocyte-activation gene 3 [Source:MGI Symbol;Acc:MGI:106588]	-	-	-	-	GO:0005576//extracellular region;GO:0005886//plasma membrane;GO:0009897//external side of plasma membrane;GO:0016020//membrane;GO:0016021//integral component of membrane	GO:0004888//transmembrane signaling receptor activity;GO:0005515//protein binding;GO:0042289//MHC class II protein binding	GO:0002250//adaptive immune response;GO:0002270//plasmacytoid dendritic cell activation;GO:0002376//immune system process;GO:0007166//cell surface receptor signaling pathway;GO:0045085//negative regulation of interleukin-2 biosynthetic process;GO:0045590//negative regulation of regulatory T cell differentiation;GO:0045954//positive regulation of natural killer cell mediated cytotoxicity;GO:005077…
ENSMUSG00000044646	83	60	59	96	145	206	0.90	0.67	0.63	1.16	1.71	2.02	0.733333333333333	1.63	1.15233094142757	0.00011905945112177	0.00260423920416144	Zbtb7c	zinc finger and BTB domain containing 7C [Source:MGI Symbol;Acc:MGI:2443302]	-	-	-	-	GO:0005634//nucleus	GO:0003676//nucleic acid binding;GO:0005515//protein binding;GO:0046872//metal ion binding	GO:0008285//negative regulation of cell proliferation;GO:0045600//positive regulation of fat cell differentiation;GO:0045944//positive regulation of transcription from RNA polymerase II promoter;GO:1903025//regulation of RNA polymerase II regulatory region sequence-specific DNA binding
ENSMUSG00000020651	509	1352	866	258	209	123	7.52	20.57	12.52	4.17	3.18	1.74	13.5366666666667	3.03	-2.15948282773022	0.000123991756072087	0.00268968047964926	Slc26a4	solute carrier family 26, member 4 [Source:MGI Symbol;Acc:MGI:1346029]	Organismal Systems	Endocrine system	ko04918//Thyroid hormone synthesis	K14702	GO:0005886//plasma membrane;GO:0005887//integral component of plasma membrane;GO:0016020//membrane;GO:0016021//integral component of membrane;GO:0016324//apical plasma membrane;GO:0031526//brush border membrane;GO:0070062//extracellular exosome	GO:0008271//secondary active sulfate transmembrane transporter activity;GO:0008509//anion transmembrane transporter activity;GO:0015106//bicarbonate transmembrane transporter activity;GO:0015108//chloride transmembrane transporter activity;GO:0015111//iodide transmembrane transporter activity;GO:0015116//sulfate transmembrane transporter activity;GO:0015301//anion:anion antiporter activity;GO:001…	GO:0006885//regulation of pH;GO:0008272//sulfate transport;GO:0009887//organ morphogenesis;GO:0015698//inorganic anion transport;GO:0015701//bicarbonate transport;GO:0015705//iodide transport;GO:0019532//oxalate transport;GO:0032880//regulation of protein localization;GO:0055085//transmembrane transport;GO:0098656//anion transmembrane transport;GO:1902358//sulfate transmembrane transport;GO:19024…
ENSMUSG00000076688	24	20	157	5	1	11	2.73	2.64	19.72	0.70	0.13	1.32	8.36333333333333	0.716666666666667	-3.54470390581971	0.000134493228638003	0.00288698619292573	Ighv15-2	immunoglobulin heavy variable V15-2 [Source:MGI Symbol;Acc:MGI:4947963]	Environmental Information Processing;Human Diseases;Human Diseases;Environmental Information Processing;Cellular Processes;Human Diseases;Human Diseases;Environmental Information Processing;Human Diseases;Human Diseases;Human Diseases;Environmental Information Processing;Organismal Systems;Human Diseases;Human Diseases;Organismal Systems;Organismal Systems;Human Diseases;Organismal Systems;Human …	Signal transduction;Infectious diseases;Infectious diseases;Signal transduction;Transport and catabolism;Cancers;Infectious diseases;Signal transduction;Immune diseases;Infectious diseases;Infectious diseases;Signal transduction;Immune system;Immune diseases;Cardiovascular diseases;Immune system;Immune system;Cardiovascular diseases;Immune system;Immune diseases;Infectious diseases;Immune system;…	ko04151//PI3K-Akt signaling pathway;ko05169//Epstein-Barr virus infection;ko05130//Pathogenic Escherichia coli infection;ko04020//Calcium signaling pathway;ko04145//Phagosome;ko05202//Transcriptional misregulation in cancers;ko05152//Tuberculosis;ko04072//Phospholipase D signaling pathway;ko05322//Systemic lupus erythematosus;ko05150//Staphylococcus aureus infection;ko05146//Amoebiasis;ko04064//N…	K06856;K06856;K06856;K06856;K06856;K06856;K06856;K06856;K06856;K06856;K06856;K06856;K06856;K06856;K06856;K06856;K06856;K06856;K06856;K06856;K06856;K06856;K06856;K06856;K06856;K06856;K06856	GO:0009897//external side of plasma membrane;GO:0042571//immunoglobulin complex, circulating	GO:0003823//antigen binding;GO:0034987//immunoglobulin receptor binding	GO:0006910//phagocytosis, recognition;GO:0006911//phagocytosis, engulfment;GO:0006958//complement activation, classical pathway;GO:0042742//defense response to bacterium;GO:0045087//innate immune response;GO:0050853//B cell receptor signaling pathway;GO:0050871//positive regulation of B cell activation
ENSMUSG00000007877	167	95	206	203	443	463	7.09	4.69	9.66	10.64	21.82	20.69	7.14666666666667	17.7166666666667	1.3097647859607	0.000140686479330395	0.00298481323156961	Tcap	titin-cap [Source:MGI Symbol;Acc:MGI:1330233]	-	-	-	-	GO:0005737//cytoplasm;GO:0030017//sarcomere;GO:0030018//Z disc;GO:0031674//I band	GO:0005515//protein binding;GO:0008307//structural constituent of muscle;GO:0030674//protein binding, bridging;GO:0031432//titin binding;GO:0036122//BMP binding;GO:0044325//ion channel binding;GO:0051373//FATZ binding;GO:0070080//titin Z domain binding	GO:0001756//somitogenesis;GO:0003009//skeletal muscle contraction;GO:0003300//cardiac muscle hypertrophy;GO:0007512//adult heart development;GO:0014898//cardiac muscle hypertrophy in response to stress;GO:0030240//skeletal muscle thin filament assembly;GO:0030241//skeletal muscle myosin thick filament assembly;GO:0030916//otic vesicle formation;GO:0035995//detection of muscle stretch;GO:0045214//…
ENSMUSG00000080115	39	38	21	7	5	8	0.58	0.65	0.34	0.13	0.09	0.12	0.523333333333333	0.113333333333333	-2.20715790764129	0.000145230076234379	0.00306581665629273	Eef1akmt3	EEF1A lysine methyltransferase 3 [Source:MGI Symbol;Acc:MGI:3645330]	-	-	-	-	GO:0005654//nucleoplasm;GO:0005737//cytoplasm;GO:0005813//centrosome;GO:0005815//microtubule organizing center;GO:0005856//cytoskeleton;GO:0032991//macromolecular complex	GO:0008168//methyltransferase activity;GO:0016279//protein-lysine N-methyltransferase activity;GO:0016740//transferase activity;GO:0031072//heat shock protein binding	GO:0018022//peptidyl-lysine methylation;GO:0032259//methylation
ENSMUSG00000076589	232	28	4	8	3	3	23.65	3.32	0.45	1.01	0.35	0.32	9.14	0.56	-4.02869543300047	0.000148199400445304	0.00310758310338842	Igkv8-18	immunoglobulin kappa variable 8-18 [Source:MGI Symbol;Acc:MGI:1330845]	-	-	-	-	GO:0005615//extracellular space	-	GO:0002377//immunoglobulin production;GO:0006955//immune response
ENSMUSG00000029816	3928	9648	1777	554	596	1043	43.94	125.94	21.96	7.78	8.15	12.26	63.9466666666667	9.39666666666667	-2.7666481808438	0.00014839415722291	0.00310758310338842	Gpnmb	glycoprotein (transmembrane) nmb [Source:MGI Symbol;Acc:MGI:1934765]	-	-	-	-	GO:0005768//endosome;GO:0005886//plasma membrane;GO:0005887//integral component of plasma membrane;GO:0016020//membrane;GO:0016021//integral component of membrane;GO:0031410//cytoplasmic vesicle;GO:0031901//early endosome membrane;GO:0033162//melanosome membrane	GO:0005178//integrin binding;GO:0008201//heparin binding;GO:0045545//syndecan binding;GO:0048018//receptor agonist activity	GO:0001649//osteoblast differentiation;GO:0001818//negative regulation of cytokine production;GO:0001934//positive regulation of protein phosphorylation;GO:0007155//cell adhesion;GO:0007165//signal transduction;GO:0007267//cell-cell signaling;GO:0030282//bone mineralization;GO:0030335//positive regulation of cell migration;GO:0031954//positive regulation of protein autophosphorylation;GO:0032720/…
ENSMUSG00000044017	399	261	305	415	543	1096	3.37	2.55	2.74	4.38	5.30	9.64	2.88666666666667	6.44	1.15765616410905	0.000159669271540595	0.00329976167348086	Adgrd1	adhesion G protein-coupled receptor D1 [Source:MGI Symbol;Acc:MGI:3041203]	-	-	-	-	GO:0005886//plasma membrane;GO:0005887//integral component of plasma membrane;GO:0016020//membrane;GO:0016021//integral component of membrane	GO:0004888//transmembrane signaling receptor activity;GO:0004930//G-protein coupled receptor activity	GO:0007166//cell surface receptor signaling pathway;GO:0007186//G-protein coupled receptor signaling pathway;GO:0007189//adenylate cyclase-activating G-protein coupled receptor signaling pathway
ENSMUSG00000076549	164	353	735	36	97	43	16.72	41.95	82.91	4.52	11.48	4.65	47.1933333333333	6.88333333333333	-2.77740379378562	0.000165627898054375	0.0033925851012263	Igkv4-68	immunoglobulin kappa variable 4-68 [Source:MGI Symbol;Acc:MGI:2686265]	-	-	-	-	GO:0005615//extracellular space	-	GO:0002377//immunoglobulin production;GO:0006955//immune response
ENSMUSG00000032226	47	75	35	8	19	10	0.44	0.82	0.36	0.09	0.21	0.10	0.54	0.133333333333333	-2.01792190799727	0.00016567084362827	0.0033925851012263	Gcnt3	glucosaminyl (N-acetyl) transferase 3, mucin type [Source:MGI Symbol;Acc:MGI:1919327]	Metabolism;Metabolism	Global and overview maps;Glycan biosynthesis and metabolism	ko01100//Metabolic pathways;ko00512//Mucin type O-glycan biosynthesis	K09662;K09662	GO:0000139//Golgi membrane;GO:0005794//Golgi apparatus;GO:0016020//membrane;GO:0016021//integral component of membrane	GO:0003829//beta-1,3-galactosyl-O-glycosyl-glycoprotein beta-1,6-N-acetylglucosaminyltransferase activity;GO:0008109//N-acetyllactosaminide beta-1,6-N-acetylglucosaminyltransferase activity;GO:0008375//acetylglucosaminyltransferase activity;GO:0016740//transferase activity;GO:0016757//transferase activity, transferring glycosyl groups;GO:0047225//acetylgalactosaminyl-O-glycosyl-glycoprotein beta-…	GO:0002426//immunoglobulin production in mucosal tissue;GO:0006486//protein glycosylation;GO:0006493//protein O-linked glycosylation;GO:0048729//tissue morphogenesis;GO:0050892//intestinal absorption;GO:0060993//kidney morphogenesis
ENSMUSG00000016458	67	34	47	89	100	268	1.54	0.88	1.07	2.22	2.49	5.53	1.16333333333333	3.41333333333333	1.55291677379035	0.0001709705335329	0.00347767116383871	Wt1	Wilms tumor 1 homolog [Source:MGI Symbol;Acc:MGI:98968]	Human Diseases	Cancers	ko05202//Transcriptional misregulation in cancers	K09234	GO:0005634//nucleus	GO:0003676//nucleic acid binding	GO:0006355//regulation of transcription, DNA-templated
ENSMUSG00000042379	220	73	116	357	310	279	4.22	1.63	2.46	8.46	6.90	5.64	2.77	7	1.33746894578314	0.000172245945240534	0.00349537029780372	Esm1	endothelial cell-specific molecule 1 [Source:MGI Symbol;Acc:MGI:1918940]	-	-	-	-	GO:0005575//cellular_component;GO:0005576//extracellular region	GO:0005171//hepatocyte growth factor receptor binding;GO:0005178//integrin binding;GO:0005520//insulin-like growth factor binding	GO:0001525//angiogenesis;GO:0002040//sprouting angiogenesis;GO:0008284//positive regulation of cell proliferation;GO:1902204//positive regulation of hepatocyte growth factor receptor signaling pathway
ENSMUSG00000022651	1160	590	866	466	192	427	78.76	46.55	64.93	39.04	15.12	30.51	63.4133333333333	28.2233333333333	-1.16789782602063	0.000177537449142942	0.00358885792117102	Retnlg	resistin like gamma [Source:MGI Symbol;Acc:MGI:2667763]	-	-	-	-	GO:0005576//extracellular region;GO:0005615//extracellular space	GO:0005179//hormone activity	GO:0002408//myeloid dendritic cell chemotaxis;GO:0007165//signal transduction
ENSMUSG00000076545	170	46	295	16	31	59	17.02	5.34	32.61	1.94	3.63	6.21	18.3233333333333	3.92666666666667	-2.2223049402073	0.000188512834878486	0.00376384303029369	Igkv4-72	immunoglobulin kappa chain variable 4-72 [Source:MGI Symbol;Acc:MGI:2686345]	-	-	-	-	GO:0005615//extracellular space	-	GO:0002377//immunoglobulin production;GO:0006955//immune response
ENSMUSG00000096670	5267	157	549	29	65	108	605.89	21.03	69.75	4.12	8.67	13.07	232.223333333333	8.62	-4.75168125904213	0.000191006475087898	0.00379287731528708	Ighv2-6	immunoglobulin heavy variable 2-6 [Source:MGI Symbol;Acc:MGI:4439518]	Environmental Information Processing;Human Diseases;Human Diseases;Environmental Information Processing;Cellular Processes;Human Diseases;Human Diseases;Environmental Information Processing;Human Diseases;Human Diseases;Human Diseases;Environmental Information Processing;Organismal Systems;Human Diseases;Human Diseases;Organismal Systems;Organismal Systems;Human Diseases;Organismal Systems;Human …	Signal transduction;Infectious diseases;Infectious diseases;Signal transduction;Transport and catabolism;Cancers;Infectious diseases;Signal transduction;Immune diseases;Infectious diseases;Infectious diseases;Signal transduction;Immune system;Immune diseases;Cardiovascular diseases;Immune system;Immune system;Cardiovascular diseases;Immune system;Immune diseases;Infectious diseases;Immune system;…	ko04151//PI3K-Akt signaling pathway;ko05169//Epstein-Barr virus infection;ko05130//Pathogenic Escherichia coli infection;ko04020//Calcium signaling pathway;ko04145//Phagosome;ko05202//Transcriptional misregulation in cancers;ko05152//Tuberculosis;ko04072//Phospholipase D signaling pathway;ko05322//Systemic lupus erythematosus;ko05150//Staphylococcus aureus infection;ko05146//Amoebiasis;ko04064//N…	K06856;K06856;K06856;K06856;K06856;K06856;K06856;K06856;K06856;K06856;K06856;K06856;K06856;K06856;K06856;K06856;K06856;K06856;K06856;K06856;K06856;K06856;K06856;K06856;K06856;K06856;K06856	GO:0009897//external side of plasma membrane;GO:0042571//immunoglobulin complex, circulating	GO:0003823//antigen binding;GO:0034987//immunoglobulin receptor binding	GO:0006910//phagocytosis, recognition;GO:0006911//phagocytosis, engulfment;GO:0006958//complement activation, classical pathway;GO:0042742//defense response to bacterium;GO:0045087//innate immune response;GO:0050853//B cell receptor signaling pathway;GO:0050871//positive regulation of B cell activation
ENSMUSG00000094262	664	5	2098	0	10	4	76.33	0.75	265.02	0.00	1.33	0.48	114.033333333333	0.603333333333333	-7.56228459657205	0.000191329855886716	0.00379450774720098	Igkv4-62	immunoglobulin kappa variable 4-62 [Source:MGI Symbol;Acc:MGI:3643587]	-	-	-	-	GO:0005615//extracellular space	-	GO:0002377//immunoglobulin production;GO:0006955//immune response
ENSMUSG00000025140	114	118	110	34	61	64	2.57	2.93	2.89	0.82	1.65	1.55	2.79666666666667	1.34	-1.0614753092609	0.000200107577956003	0.00395363301320861	Pycr1	pyrroline-5-carboxylate reductase 1 [Source:MGI Symbol;Acc:MGI:2384795]	Metabolism;Metabolism;Metabolism	Global and overview maps;Global and overview maps;Amino acid metabolism	ko01100//Metabolic pathways;ko01230//Biosynthesis of amino acids;ko00330//Arginine and proline metabolism	K00286;K00286;K00286	GO:0005739//mitochondrion	GO:0004735//pyrroline-5-carboxylate reductase activity;GO:0016491//oxidoreductase activity;GO:0042802//identical protein binding	GO:0006561//proline biosynthetic process;GO:0008652//cellular amino acid biosynthetic process;GO:0034599//cellular response to oxidative stress;GO:0051881//regulation of mitochondrial membrane potential;GO:0055114//oxidation-reduction process;GO:0055129//L-proline biosynthetic process;GO:1903206//negative regulation of hydrogen peroxide-induced cell death
ENSMUSG00000032122	788	1396	640	364	380	566	7.92	15.76	7.00	4.66	4.41	5.85	10.2266666666667	4.97333333333333	-1.0400509472477	0.000202828765313539	0.00399735337354138	Slc37a2	solute carrier family 37 (glycerol-3-phosphate transporter), member 2 [Source:MGI Symbol;Acc:MGI:1929693]	-	-	-	-	GO:0005783//endoplasmic reticulum;GO:0005789//endoplasmic reticulum membrane;GO:0016020//membrane;GO:0016021//integral component of membrane;GO:0030176//integral component of endoplasmic reticulum membrane	GO:0015169//glycerol-3-phosphate transmembrane transporter activity;GO:0015297//antiporter activity;GO:0022857//transmembrane transporter activity;GO:0061513//glucose 6-phosphate:inorganic phosphate antiporter activity	GO:0006072//glycerol-3-phosphate metabolic process;GO:0006127//glycerophosphate shuttle;GO:0008643//carbohydrate transport;GO:0015760//glucose-6-phosphate transport;GO:0015794//glycerol-3-phosphate transport;GO:0035435//phosphate ion transmembrane transport;GO:0055085//transmembrane transport
ENSMUSG00000079164	46	57	70	239	88	154	0.67	0.98	1.06	4.09	1.29	2.48	0.903333333333333	2.62	1.53623646090474	0.000218809330067037	0.00424317427122601	Tlr5	toll-like receptor 5 [Source:MGI Symbol;Acc:MGI:1858171]	Human Diseases;Human Diseases;Human Diseases;Organismal Systems;Human Diseases;Human Diseases	Infectious diseases;Infectious diseases;Infectious diseases;Immune system;Immune diseases;Infectious diseases	ko05130//Pathogenic Escherichia coli infection;ko05131//Shigellosis;ko05132//Salmonella infection;ko04620//Toll-like receptor signaling pathway;ko05321//Inflammatiory bowel disease (IBD);ko05134//Legionellosis	K10168;K10168;K10168;K10168;K10168;K10168	GO:0016020//membrane;GO:0016021//integral component of membrane	GO:0004888//transmembrane signaling receptor activity;GO:0005515//protein binding	GO:0001819//positive regulation of cytokine production;GO:0002376//immune system process;GO:0002755//MyD88-dependent toll-like receptor signaling pathway;GO:0007165//signal transduction;GO:0008584//male gonad development;GO:0034146//toll-like receptor 5 signaling pathway;GO:0042742//defense response to bacterium;GO:0045087//innate immune response;GO:0045429//positive regulation of nitric oxide bi…
ENSMUSG00000054072	1847	3711	4225	771	1234	1310	28.34	65.53	71.10	14.81	22.52	20.83	54.99	19.3866666666667	-1.5041045180626	0.000225897815710803	0.00434846382825434	Iigp1	interferon inducible GTPase 1 [Source:MGI Symbol;Acc:MGI:1926259]	Environmental Information Processing	Signal transduction	ko04668//TNF signaling pathway	K17072	GO:0005634//nucleus;GO:0005737//cytoplasm;GO:0005783//endoplasmic reticulum;GO:0005789//endoplasmic reticulum membrane;GO:0005794//Golgi apparatus;GO:0016020//membrane;GO:0020005//symbiont-containing vacuole membrane;GO:0031965//nuclear membrane;GO:0032580//Golgi cisterna membrane	GO:0000166//nucleotide binding;GO:0003924//GTPase activity;GO:0005515//protein binding;GO:0005525//GTP binding;GO:0016787//hydrolase activity;GO:0019003//GDP binding;GO:0042802//identical protein binding	GO:0002376//immune system process;GO:0006952//defense response;GO:0009617//response to bacterium;GO:0010506//regulation of autophagy;GO:0019221//cytokine-mediated signaling pathway;GO:0035458//cellular response to interferon-beta;GO:0042832//defense response to protozoan;GO:0045087//innate immune response;GO:0050829//defense response to Gram-negative bacterium
ENSMUSG00000030107	869	2433	2178	500	585	488	19.87	64.67	55.44	14.16	15.42	11.67	46.66	13.75	-1.76275468868481	0.00023749313390576	0.00454939648835065	Usp18	ubiquitin specific peptidase 18 [Source:MGI Symbol;Acc:MGI:1344364]	-	-	-	-	GO:0005634//nucleus;GO:0005829//cytosol	GO:0004197//cysteine-type endopeptidase activity;GO:0004843//thiol-dependent ubiquitin-specific protease activity;GO:0005515//protein binding;GO:0008233//peptidase activity;GO:0008234//cysteine-type peptidase activity;GO:0016787//hydrolase activity;GO:0019785//ISG15-specific protease activity;GO:0036459//thiol-dependent ubiquitinyl hydrolase activity	GO:0006508//proteolysis;GO:0006511//ubiquitin-dependent protein catabolic process;GO:0009617//response to bacterium;GO:0016579//protein deubiquitination;GO:0035634//response to stilbenoid;GO:0050727//regulation of inflammatory response
ENSMUSG00000040896	47	49	51	80	91	123	0.35	0.42	0.35	0.76	0.92	0.90	0.373333333333333	0.86	1.20387233336565	0.000246929913162531	0.004696768641277	Kcnd3	potassium voltage-gated channel, Shal-related family, member 3 [Source:MGI Symbol;Acc:MGI:1928743]	Human Diseases	Neurodegenerative disease	ko05017//Spinocerebellar ataxia	K04893	GO:0005886//plasma membrane;GO:0005887//integral component of plasma membrane;GO:0005901//caveola;GO:0008076//voltage-gated potassium channel complex;GO:0016020//membrane;GO:0016021//integral component of membrane;GO:0030425//dendrite;GO:0034705//potassium channel complex;GO:0042383//sarcolemma;GO:0042995//cell projection;GO:0043005//neuron projection;GO:0043025//neuronal cell body;GO:0097038//pe…	GO:0005216//ion channel activity;GO:0005244//voltage-gated ion channel activity;GO:0005249//voltage-gated potassium channel activity;GO:0005250//A-type (transient outward) potassium channel activity;GO:0005267//potassium channel activity;GO:0005515//protein binding;GO:0044325//ion channel binding;GO:0046872//metal ion binding;GO:1902282//voltage-gated potassium channel activity involved in ventri…	GO:0006811//ion transport;GO:0006813//potassium ion transport;GO:0034765//regulation of ion transmembrane transport;GO:0051260//protein homooligomerization;GO:0055085//transmembrane transport;GO:0071773//cellular response to BMP stimulus;GO:0071805//potassium ion transmembrane transport;GO:0086009//membrane repolarization;GO:0086091//regulation of heart rate by cardiac conduction;GO:0097623//pota…
ENSMUSG00000000794	133	63	114	203	229	181	1.86	1.02	1.76	3.50	3.71	2.66	1.54666666666667	3.29	1.08892527932882	0.000247859487130212	0.00470783351944064	Kcnn3	potassium intermediate/small conductance calcium-activated channel, subfamily N, member 3 [Source:MGI Symbol;Acc:MGI:2153183]	Organismal Systems;Organismal Systems	Endocrine system;Endocrine system	ko04911//Insulin secretion;ko04929//GnRH secretion	K04944;K04944	GO:0005737//cytoplasm;GO:0005886//plasma membrane;GO:0016020//membrane;GO:0016021//integral component of membrane;GO:0030175//filopodium;GO:0031594//neuromuscular junction;GO:0043005//neuron projection;GO:0043025//neuronal cell body;GO:0044297//cell body	GO:0005516//calmodulin binding;GO:0015269//calcium-activated potassium channel activity;GO:0016286//small conductance calcium-activated potassium channel activity;GO:0044877//macromolecular complex binding	GO:0006811//ion transport;GO:0006813//potassium ion transport;GO:0071805//potassium ion transmembrane transport
ENSMUSG00000044703	70	169	177	37	44	63	2.09	5.86	5.81	1.35	1.52	1.97	4.58666666666667	1.61333333333333	-1.50740151742751	0.000257648630581172	0.00484114696911599	Phf11a	PHD finger protein 11A [Source:MGI Symbol;Acc:MGI:1918441]	Metabolism;Metabolism	Global and overview maps;Amino acid metabolism	ko01100//Metabolic pathways;ko00310//Lysine degradation	K18494;K18494	GO:0005634//nucleus;GO:0005654//nucleoplasm;GO:0031965//nuclear membrane	GO:0003674//molecular_function;GO:0046872//metal ion binding	GO:0050776//regulation of immune response
ENSMUSG00000068246	66	231	264	35	64	64	1.72	7.85	8.49	1.14	2.25	1.85	6.02	1.74666666666667	-1.78515917594341	0.000288152621846324	0.00530032313892063	Apol9b	apolipoprotein L 9b [Source:MGI Symbol;Acc:MGI:1919148]	-	-	-	-	GO:0005575//cellular_component;GO:0005576//extracellular region	GO:0008289//lipid binding	GO:0006869//lipid transport;GO:0008150//biological_process;GO:0042157//lipoprotein metabolic process
ENSMUSG00000094164	325	449	443	242	142	100	37.75	60.54	56.77	34.64	19.11	12.21	51.6866666666667	21.9866666666667	-1.23316326614632	0.000300398082729989	0.00546596195980896	Ighv2-3	immunoglobulin heavy variable 2-3 [Source:MGI Symbol;Acc:MGI:4439872]	Environmental Information Processing;Human Diseases;Human Diseases;Environmental Information Processing;Cellular Processes;Human Diseases;Human Diseases;Environmental Information Processing;Human Diseases;Human Diseases;Human Diseases;Environmental Information Processing;Organismal Systems;Human Diseases;Human Diseases;Organismal Systems;Organismal Systems;Human Diseases;Organismal Systems;Human …	Signal transduction;Infectious diseases;Infectious diseases;Signal transduction;Transport and catabolism;Cancers;Infectious diseases;Signal transduction;Immune diseases;Infectious diseases;Infectious diseases;Signal transduction;Immune system;Immune diseases;Cardiovascular diseases;Immune system;Immune system;Cardiovascular diseases;Immune system;Immune diseases;Infectious diseases;Immune system;…	ko04151//PI3K-Akt signaling pathway;ko05169//Epstein-Barr virus infection;ko05130//Pathogenic Escherichia coli infection;ko04020//Calcium signaling pathway;ko04145//Phagosome;ko05202//Transcriptional misregulation in cancers;ko05152//Tuberculosis;ko04072//Phospholipase D signaling pathway;ko05322//Systemic lupus erythematosus;ko05150//Staphylococcus aureus infection;ko05146//Amoebiasis;ko04064//N…	K06856;K06856;K06856;K06856;K06856;K06856;K06856;K06856;K06856;K06856;K06856;K06856;K06856;K06856;K06856;K06856;K06856;K06856;K06856;K06856;K06856;K06856;K06856;K06856;K06856;K06856;K06856	GO:0009897//external side of plasma membrane;GO:0042571//immunoglobulin complex, circulating	GO:0003823//antigen binding;GO:0034987//immunoglobulin receptor binding	GO:0006910//phagocytosis, recognition;GO:0006911//phagocytosis, engulfment;GO:0006958//complement activation, classical pathway;GO:0042742//defense response to bacterium;GO:0045087//innate immune response;GO:0050853//B cell receptor signaling pathway;GO:0050871//positive regulation of B cell activation
ENSMUSG00000032034	59	26	28	66	109	116	0.55	0.26	0.35	0.81	1.18	1.20	0.386666666666667	1.06333333333333	1.45943161863729	0.000312298844087568	0.00563248156073989	Kcnj5	potassium inwardly-rectifying channel, subfamily J, member 5 [Source:MGI Symbol;Acc:MGI:104755]	Organismal Systems;Organismal Systems;Organismal Systems;Organismal Systems;Organismal Systems;Organismal Systems;Organismal Systems;Human Diseases;Organismal Systems	Endocrine system;Nervous system;Nervous system;Endocrine system;Nervous system;Environmental adaptation;Endocrine system;Substance dependence;Endocrine system	ko04921//Oxytocin signaling pathway;ko04723//Retrograde endocannabinoid signaling;ko04726//Serotonergic synapse;ko04915//Estrogen signaling pathway;ko04728//Dopaminergic synapse;ko04713//Circadian entrainment;ko04925//Aldosterone synthesis and secretion;ko05032//Morphine addiction;ko04929//GnRH secretion	K04999;K04999;K04999;K04999;K04999;K04999;K04999;K04999;K04999	GO:0008076//voltage-gated potassium channel complex;GO:0009897//external side of plasma membrane;GO:0016020//membrane;GO:0016021//integral component of membrane;GO:0030315//T-tubule	GO:0005242//inward rectifier potassium channel activity;GO:0005244//voltage-gated ion channel activity;GO:0015467//G-protein activated inward rectifier potassium channel activity;GO:0086089//voltage-gated potassium channel activity involved in atrial cardiac muscle cell action potential repolarization	GO:0006811//ion transport;GO:0006813//potassium ion transport;GO:0034220//ion transmembrane transport;GO:0034765//regulation of ion transmembrane transport;GO:0071805//potassium ion transmembrane transport;GO:0086091//regulation of heart rate by cardiac conduction;GO:0098914//membrane repolarization during atrial cardiac muscle cell action potential;GO:1990573//potassium ion import across plasma …
ENSMUSG00000040328	37	54	58	11	17	20	0.75	1.27	1.30	0.27	0.40	0.43	1.10666666666667	0.366666666666667	-1.59367971782227	0.000332985773230774	0.00590402170868138	Olfr56	olfactory receptor 56 [Source:MGI Symbol;Acc:MGI:1333785]	Organismal Systems	Sensory system	ko04740//Olfactory transduction	K04257	GO:0005886//plasma membrane;GO:0016020//membrane;GO:0016021//integral component of membrane	GO:0004930//G-protein coupled receptor activity;GO:0004984//olfactory receptor activity	GO:0007165//signal transduction;GO:0007186//G-protein coupled receptor signaling pathway;GO:0007608//sensory perception of smell;GO:0050896//response to stimulus;GO:0050911//detection of chemical stimulus involved in sensory perception of smell
ENSMUSG00000079625	21	64	5	0	3	2	0.68	2.40	0.16	0.00	0.12	0.08	1.08	0.0666666666666667	-4.01792190799726	0.000335571706095113	0.00594317142089847	Tm4sf19	transmembrane 4 L six family member 19 [Source:MGI Symbol;Acc:MGI:3645933]	-	-	-	-	GO:0016020//membrane;GO:0016021//integral component of membrane	GO:0003674//molecular_function	GO:0008150//biological_process
ENSMUSG00000070501	29	108	35	6	12	0	0.74	3.11	0.98	0.14	0.35	0.00	1.61	0.163333333333333	-3.30116953472057	0.00034030078817038	0.0060173620503193	Ifi214	interferon activated gene 214 [Source:MGI Symbol;Acc:MGI:3584522]	Organismal Systems	Immune system	ko04621//NOD-like receptor signaling pathway	K20914	-	-	GO:0002218//activation of innate immune response;GO:0035458//cellular response to interferon-beta
ENSMUSG00000020469	483	158	246	404	804	850	32.97	12.53	18.54	33.98	63.60	61.01	21.3466666666667	52.8633333333333	1.30825659082886	0.000347516655456151	0.00607424058840104	Myl7	myosin, light polypeptide 7, regulatory [Source:MGI Symbol;Acc:MGI:107495]	Human Diseases;Cellular Processes;Cellular Processes;Organismal Systems	Infectious diseases;Cell motility;Cellular community - eukaryotes;Immune system	ko05131//Shigellosis;ko04810//Regulation of actin cytoskeleton;ko04510//Focal adhesion;ko04670//Leukocyte transendothelial migration	K12754;K12754;K12754;K12754	GO:0016459//myosin complex;GO:0031672//A band;GO:0043197//dendritic spine	GO:0005509//calcium ion binding;GO:0005515//protein binding;GO:0046872//metal ion binding	-
ENSMUSG00000089722	0	0	0	5	16	9	0.00	0.00	0.00	0.31	0.89	0.45	0.001	0.55	9.10328780841202	0.000354816821554235	0.00617962807595067	Cd300ld5	CD300 molecule like family member D5 [Source:MGI Symbol;Acc:MGI:3702661]	-	-	-	-	GO:0005575//cellular_component;GO:0016020//membrane;GO:0016021//integral component of membrane	GO:0003674//molecular_function	GO:0008150//biological_process
ENSMUSG00000025854	701	1332	506	301	387	439	10.90	21.97	9.02	4.97	7.05	6.33	13.9633333333333	6.11666666666667	-1.19082582113594	0.000371348227704679	0.00640372102753453	Fam20c	family with sequence similarity 20, member C [Source:MGI Symbol;Acc:MGI:2136853]	-	-	-	-	GO:0005576//extracellular region;GO:0005615//extracellular space;GO:0005737//cytoplasm;GO:0005794//Golgi apparatus	GO:0000166//nucleotide binding;GO:0004674//protein serine/threonine kinase activity;GO:0005509//calcium ion binding;GO:0005524//ATP binding;GO:0016301//kinase activity;GO:0016740//transferase activity;GO:0016773//phosphotransferase activity, alcohol group as acceptor;GO:0030145//manganese ion binding;GO:0046872//metal ion binding	GO:0001501//skeletal system development;GO:0006468//protein phosphorylation;GO:0016310//phosphorylation;GO:0030501//positive regulation of bone mineralization;GO:0031214//biomineral tissue development;GO:0036179//osteoclast maturation;GO:0040036//regulation of fibroblast growth factor receptor signaling pathway;GO:0045669//positive regulation of osteoblast differentiation;GO:0046034//ATP metaboli…
ENSMUSG00000076563	801	769	149	113	94	78	89.59	99.95	18.40	15.59	12.19	9.18	69.3133333333333	12.32	-2.49213064443382	0.000372647573355978	0.00641206606801911	Igkv5-48	immunoglobulin kappa variable 5-48 [Source:MGI Symbol;Acc:MGI:3642817]	-	-	-	-	GO:0005615//extracellular space;GO:0019814//immunoglobulin complex	-	GO:0002250//adaptive immune response;GO:0002376//immune system process;GO:0002377//immunoglobulin production;GO:0006955//immune response
ENSMUSG00000095609	124	177	194	34	63	101	3.00	4.96	5.18	1.00	1.76	2.55	4.38	1.77	-1.30718150951818	0.000380341242999102	0.00651593325560663	Gm21188	predicted gene, 21188 [Source:MGI Symbol;Acc:MGI:5434543]	-	-	-	-	-	GO:0038023//signaling receptor activity	-
ENSMUSG00000094652	2	23	13	0	0	0	0.23	3.13	1.61	0.00	0.00	0.00	1.65666666666667	0.001	-10.6940676357285	0.000384305238207828	0.00654137984405635	Ighv1-42	immunoglobulin heavy variable V1-42 [Source:MGI Symbol;Acc:MGI:3704123]	Environmental Information Processing;Human Diseases;Human Diseases;Environmental Information Processing;Cellular Processes;Human Diseases;Human Diseases;Environmental Information Processing;Human Diseases;Human Diseases;Human Diseases;Environmental Information Processing;Organismal Systems;Human Diseases;Human Diseases;Organismal Systems;Organismal Systems;Human Diseases;Organismal Systems;Human …	Signal transduction;Infectious diseases;Infectious diseases;Signal transduction;Transport and catabolism;Cancers;Infectious diseases;Signal transduction;Immune diseases;Infectious diseases;Infectious diseases;Signal transduction;Immune system;Immune diseases;Cardiovascular diseases;Immune system;Immune system;Cardiovascular diseases;Immune system;Immune diseases;Infectious diseases;Immune system;…	ko04151//PI3K-Akt signaling pathway;ko05169//Epstein-Barr virus infection;ko05130//Pathogenic Escherichia coli infection;ko04020//Calcium signaling pathway;ko04145//Phagosome;ko05202//Transcriptional misregulation in cancers;ko05152//Tuberculosis;ko04072//Phospholipase D signaling pathway;ko05322//Systemic lupus erythematosus;ko05150//Staphylococcus aureus infection;ko05146//Amoebiasis;ko04064//N…	K06856;K06856;K06856;K06856;K06856;K06856;K06856;K06856;K06856;K06856;K06856;K06856;K06856;K06856;K06856;K06856;K06856;K06856;K06856;K06856;K06856;K06856;K06856;K06856;K06856;K06856;K06856	GO:0009897//external side of plasma membrane;GO:0042571//immunoglobulin complex, circulating	GO:0003823//antigen binding;GO:0034987//immunoglobulin receptor binding	GO:0006910//phagocytosis, recognition;GO:0006911//phagocytosis, engulfment;GO:0006958//complement activation, classical pathway;GO:0042742//defense response to bacterium;GO:0045087//innate immune response;GO:0050853//B cell receptor signaling pathway;GO:0050871//positive regulation of B cell activation
ENSMUSG00000022040	131	161	100	155	337	372	2.59	3.70	2.18	3.79	7.73	7.75	2.82333333333333	6.42333333333333	1.18592269696352	0.000402514375840575	0.00676318759491958	Ephx2	epoxide hydrolase 2, cytoplasmic [Source:MGI Symbol;Acc:MGI:99500]	Metabolism;Metabolism;Cellular Processes	Global and overview maps;Lipid metabolism;Transport and catabolism	ko01100//Metabolic pathways;ko00590//Arachidonic acid metabolism;ko04146//Peroxisome	K08726;K08726;K08726	GO:0005737//cytoplasm;GO:0005777//peroxisome;GO:0005829//cytosol	GO:0000287//magnesium ion binding;GO:0003824//catalytic activity;GO:0004301//epoxide hydrolase activity;GO:0015643//toxic substance binding;GO:0016787//hydrolase activity;GO:0016791//phosphatase activity;GO:0033885//10-hydroxy-9-(phosphonooxy)octadecanoate phosphatase activity;GO:0042577//lipid phosphatase activity;GO:0042803//protein homodimerization activity;GO:0046872//metal ion binding;GO:005…	GO:0002539//prostaglandin production involved in inflammatory response;GO:0006629//lipid metabolic process;GO:0006954//inflammatory response;GO:0008152//metabolic process;GO:0009636//response to toxic substance;GO:0010628//positive regulation of gene expression;GO:0016311//dephosphorylation;GO:0019233//sensory perception of pain;GO:0019439//aromatic compound catabolic process;GO:0042632//choleste…
ENSMUSG00000016529	36	7	38	1	2	5	1.11	0.25	1.29	0.04	0.07	0.16	0.883333333333333	0.09	-3.29496104728709	0.000406032104998383	0.00680943811618252	Il10	interleukin 10 [Source:MGI Symbol;Acc:MGI:96537]	Environmental Information Processing;Human Diseases;Human Diseases;Human Diseases;Human Diseases;Human Diseases;Human Diseases;Environmental Information Processing;Human Diseases;Organismal Systems;Human Diseases;Human Diseases;Environmental Information Processing;Human Diseases;Human Diseases;Organismal Systems;Human Diseases;Organismal Systems;Environmental Information Processing;Human Diseases…	Signaling molecules and interaction;Infectious diseases;Immune diseases;Infectious diseases;Infectious diseases;Immune diseases;Infectious diseases;Signal transduction;Immune diseases;Immune system;Infectious diseases;Immune diseases;Signal transduction;Infectious disease: bacterial;Infectious diseases;Immune system;Infectious diseases;Immune system;Signaling molecules and interaction;Infectious …	ko04060//Cytokine-cytokine receptor interaction;ko05152//Tuberculosis;ko05322//Systemic lupus erythematosus;ko05150//Staphylococcus aureus infection;ko05146//Amoebiasis;ko05320//Autoimmune thyroid disease;ko05140//Leishmaniasis;ko04630//Jak-STAT signaling pathway;ko05330//Allograft rejection;ko04672//Intestinal immune network for IgA production;ko05143//African trypanosomiasis;ko05310//Asthma;ko0…	K05443;K05443;K05443;K05443;K05443;K05443;K05443;K05443;K05443;K05443;K05443;K05443;K05443;K05443;K05443;K05443;K05443;K05443;K05443;K05443;K05443;K05443	GO:0005576//extracellular region;GO:0005615//extracellular space	GO:0005125//cytokine activity;GO:0005141//interleukin-10 receptor binding;GO:0046983//protein dimerization activity	GO:0001818//negative regulation of cytokine production;GO:0001938//positive regulation of endothelial cell proliferation;GO:0002237//response to molecule of bacterial origin;GO:0002740//negative regulation of cytokine secretion involved in immune response;GO:0002875//negative regulation of chronic inflammatory response to antigenic stimulus;GO:0002904//positive regulation of B cell apoptotic proc…
ENSMUSG00000073555	40	132	116	24	31	31	0.61	2.33	1.95	0.45	0.56	0.50	1.63	0.503333333333333	-1.69528591562716	0.00044392987649769	0.00732118319351835	Gm4951	predicted gene 4951 [Source:MGI Symbol;Acc:MGI:3644953]	Environmental Information Processing	Signal transduction	ko04668//TNF signaling pathway	K17072	GO:0005789//endoplasmic reticulum membrane;GO:0016020//membrane	GO:0003924//GTPase activity;GO:0005525//GTP binding	GO:0006952//defense response;GO:0035458//cellular response to interferon-beta
ENSMUSG00000096490	5882	2894	511	55	115	451	682.51	390.19	65.43	7.87	15.52	55.08	379.376666666667	26.1566666666667	-3.8583803447962	0.000446326103942856	0.00734243790450764	Igkv10-94	immunoglobulin kappa variable 10-94 [Source:MGI Symbol;Acc:MGI:3646140]	-	-	-	-	GO:0005615//extracellular space	-	GO:0002377//immunoglobulin production;GO:0006955//immune response
ENSMUSG00000094433	3111	658	225	55	81	175	330.49	81.19	26.40	7.21	9.92	19.60	146.026666666667	12.2433333333333	-3.57616355052625	0.000447836584750043	0.00735077149020377	Igkv5-43	immunoglobulin kappa chain variable 5-43 [Source:MGI Symbol;Acc:MGI:4943320]	-	-	-	-	GO:0005615//extracellular space	-	GO:0002377//immunoglobulin production;GO:0006955//immune response
ENSMUSG00000030114	168	138	203	53	58	119	4.78	4.57	6.38	1.86	1.92	3.57	5.24333333333333	2.45	-1.09770251569196	0.000448234873727056	0.00735077149020377	Klrg1	killer cell lectin-like receptor subfamily G, member 1 [Source:MGI Symbol;Acc:MGI:1355294]	-	-	-	-	GO:0005886//plasma membrane;GO:0016020//membrane;GO:0016021//integral component of membrane;GO:0043231//intracellular membrane-bounded organelle	GO:0030246//carbohydrate binding	GO:0002376//immune system process;GO:0007166//cell surface receptor signaling pathway;GO:0045087//innate immune response
ENSMUSG00000008461	40	76	54	11	24	17	0.73	1.38	0.93	0.22	0.43	0.42	1.01333333333333	0.356666666666667	-1.50646052704243	0.000465201671741768	0.00754473674898392	Fut1	fucosyltransferase 1 [Source:MGI Symbol;Acc:MGI:109375]	Metabolism;Metabolism;Metabolism	Global and overview maps;Glycan biosynthesis and metabolism;Glycan biosynthesis and metabolism	ko01100//Metabolic pathways;ko00601//Glycosphingolipid biosynthesis - lacto and neolacto series;ko00603//Glycosphingolipid biosynthesis - globo and isoglobo series	K00718;K00718;K00718	GO:0005794//Golgi apparatus;GO:0016020//membrane;GO:0032580//Golgi cisterna membrane	GO:0008107//galactoside 2-alpha-L-fucosyltransferase activity;GO:0016740//transferase activity;GO:0016757//transferase activity, transferring glycosyl groups	GO:0001954//positive regulation of cell-matrix adhesion;GO:0005975//carbohydrate metabolic process;GO:0006486//protein glycosylation;GO:0010595//positive regulation of endothelial cell migration;GO:0036065//fucosylation;GO:1903672//positive regulation of sprouting angiogenesis;GO:1904906//positive regulation of endothelial cell-matrix adhesion via fibronectin
ENSMUSG00000035692	211	1006	782	77	171	86	12.09	66.96	49.46	5.44	11.36	5.18	42.8366666666667	7.32666666666667	-2.54761733563866	0.000466193599458962	0.0075455671048271	Isg15	ISG15 ubiquitin-like modifier [Source:MGI Symbol;Acc:MGI:1855694]	Human Diseases;Human Diseases;Organismal Systems	Infectious diseases;Infectious diseases;Immune system	ko05169//Epstein-Barr virus infection;ko05165//Human papillomavirus infection;ko04622//RIG-I-like receptor signaling pathway	K12159;K12159;K12159	GO:0005576//extracellular region;GO:0005634//nucleus;GO:0005737//cytoplasm	GO:0005178//integrin binding;GO:0005515//protein binding;GO:0031386//protein tag;GO:0031625//ubiquitin protein ligase binding	GO:0007229//integrin-mediated signaling pathway;GO:0009617//response to bacterium;GO:0019941//modification-dependent protein catabolic process;GO:0030501//positive regulation of bone mineralization;GO:0031397//negative regulation of protein ubiquitination;GO:0032020//ISG15-protein conjugation;GO:0032649//regulation of interferon-gamma production;GO:0034340//response to type I interferon;GO:004274…
ENSMUSG00000027322	1038	1729	2126	253	725	510	6.62	13.24	14.94	1.98	5.47	3.44	11.6	3.63	-1.67608335201918	0.000475929191233355	0.00766114471906547	Siglec1	sialic acid binding Ig-like lectin 1, sialoadhesin [Source:MGI Symbol;Acc:MGI:99668]	Environmental Information Processing	Signaling molecules and interaction	ko04514//Cell adhesion molecules (CAMs)	K06548	GO:0016020//membrane;GO:0016021//integral component of membrane	-	-
ENSMUSG00000030046	25	5	5	0	0	0	0.22	0.05	0.05	0.00	0.00	0.00	0.106666666666667	0.001	-6.73696559416621	0.000488564851088646	0.00781654060332771	Bmp10	bone morphogenetic protein 10 [Source:MGI Symbol;Acc:MGI:1338820]	Environmental Information Processing	Signaling molecules and interaction	ko04060//Cytokine-cytokine receptor interaction	K22670	GO:0005576//extracellular region;GO:0005615//extracellular space;GO:0005737//cytoplasm;GO:0009986//cell surface;GO:0030018//Z disc	GO:0005125//cytokine activity;GO:0005179//hormone activity;GO:0008083//growth factor activity;GO:0031433//telethonin binding;GO:0033612//receptor serine/threonine kinase binding	GO:0007155//cell adhesion;GO:0007275//multicellular organism development;GO:0007507//heart development;GO:0007512//adult heart development;GO:0010596//negative regulation of endothelial cell migration;GO:0010613//positive regulation of cardiac muscle hypertrophy;GO:0010614//negative regulation of cardiac muscle hypertrophy;GO:0010628//positive regulation of gene expression;GO:0010862//positive re…
ENSMUSG00000023913	880	770	575	154	297	541	18.20	19.16	13.66	4.34	7.55	11.71	17.0066666666667	7.86666666666667	-1.11227603935327	0.000503337812848497	0.00799595331582658	Pla2g7	phospholipase A2, group VII (platelet-activating factor acetylhydrolase, plasma) [Source:MGI Symbol;Acc:MGI:1351327]	Metabolism;Metabolism	Global and overview maps;Lipid metabolism	ko01100//Metabolic pathways;ko00565//Ether lipid metabolism	K01062;K01062	GO:0005576//extracellular region;GO:0005615//extracellular space;GO:0005737//cytoplasm;GO:0034362//low-density lipoprotein particle	GO:0003847//1-alkyl-2-acetylglycerophosphocholine esterase activity;GO:0005543//phospholipid binding;GO:0016787//hydrolase activity;GO:0047499//calcium-independent phospholipase A2 activity	GO:0006629//lipid metabolic process;GO:0006954//inflammatory response;GO:0016042//lipid catabolic process;GO:0034374//low-density lipoprotein particle remodeling;GO:0034440//lipid oxidation;GO:0034441//plasma lipoprotein particle oxidation;GO:0046469//platelet activating factor metabolic process;GO:0090026//positive regulation of monocyte chemotaxis
ENSMUSG00000074896	1808	5969	5855	1126	1311	1083	41.73	160.07	149.19	32.04	35.08	26.30	116.996666666667	31.14	-1.90962657727076	0.000506072639945734	0.00803128598226696	Ifit3	interferon-induced protein with tetratricopeptide repeats 3 [Source:MGI Symbol;Acc:MGI:1101055]	-	-	-	-	GO:0005737//cytoplasm;GO:0005739//mitochondrion;GO:0005829//cytosol	GO:0003723//RNA binding;GO:0005515//protein binding;GO:0042802//identical protein binding	GO:0002376//immune system process;GO:0008285//negative regulation of cell proliferation;GO:0009615//response to virus;GO:0009617//response to bacterium;GO:0035457//cellular response to interferon-alpha;GO:0035458//cellular response to interferon-beta;GO:0035634//response to stilbenoid;GO:0043066//negative regulation of apoptotic process;GO:0045087//innate immune response;GO:0051607//defense respo…
ENSMUSG00000026630	70	70	54	17	23	36	3.65	4.31	3.04	1.06	1.42	2.08	3.66666666666667	1.52	-1.27039779424728	0.000512312078104133	0.0081139295592585	Batf3	basic leucine zipper transcription factor, ATF-like 3 [Source:MGI Symbol;Acc:MGI:1925491]	Human Diseases	Cancer: overview	ko05235//PD-L1 expression and PD-1 checkpoint pathway in cancer	K09034	GO:0005634//nucleus	GO:0000978//RNA polymerase II core promoter proximal region sequence-specific DNA binding;GO:0000981//RNA polymerase II transcription factor activity, sequence-specific DNA binding;GO:0001227//transcriptional repressor activity, RNA polymerase II transcription regulatory region sequence-specific binding;GO:0003677//DNA binding;GO:0003700//transcription factor activity, sequence-specific DNA bindi…	GO:0000122//negative regulation of transcription from RNA polymerase II promoter;GO:0006355//regulation of transcription, DNA-templated;GO:0006357//regulation of transcription from RNA polymerase II promoter;GO:0009615//response to virus;GO:0030154//cell differentiation;GO:0043011//myeloid dendritic cell differentiation;GO:0097028//dendritic cell differentiation
ENSMUSG00000021223	47	65	64	105	127	108	0.44	0.70	0.67	1.21	1.39	1.07	0.603333333333333	1.22333333333333	1.01979036576	0.00053762109148427	0.00846363053630942	Papln	papilin, proteoglycan-like sulfated glycoprotein [Source:MGI Symbol;Acc:MGI:2386139]	-	-	-	-	GO:0005576//extracellular region;GO:0005604//basement membrane	GO:0004867//serine-type endopeptidase inhibitor activity;GO:0005201//extracellular matrix structural constituent;GO:0008233//peptidase activity;GO:0030414//peptidase inhibitor activity	GO:0006508//proteolysis;GO:0010466//negative regulation of peptidase activity;GO:0010951//negative regulation of endopeptidase activity
ENSMUSG00000049241	49	68	38	76	122	195	0.60	0.97	0.51	1.15	1.73	2.52	0.693333333333333	1.8	1.37637587890974	0.000538852342461933	0.00847453078989882	Hcar1	hydrocarboxylic acid receptor 1 [Source:MGI Symbol;Acc:MGI:2441671]	Environmental Information Processing	Signal transduction	ko04024//cAMP signaling pathway	K08401	GO:0016020//membrane;GO:0016021//integral component of membrane	GO:0004930//G-protein coupled receptor activity	GO:0007165//signal transduction;GO:0007186//G-protein coupled receptor signaling pathway
ENSMUSG00000012123	144	89	141	208	195	215	1.20	1.00	1.28	2.14	3.62	1.90	1.16	2.55333333333333	1.13825708607623	0.000557162664420214	0.00868433817971923	Crybg2	crystallin beta-gamma domain containing 2 [Source:MGI Symbol;Acc:MGI:1334463]	-	-	-	-	GO:0005575//cellular_component	GO:0003674//molecular_function	GO:0008150//biological_process
ENSMUSG00000031578	38	41	46	15	7	16	0.80	1.00	1.08	0.39	0.18	0.37	0.96	0.313333333333333	-1.61533614976468	0.000561345249594618	0.00874086805977679	Mak16	MAK16 homolog [Source:MGI Symbol;Acc:MGI:1915170]	-	-	-	-	GO:0005634//nucleus;GO:0005730//nucleolus;GO:0030687//preribosome, large subunit precursor;GO:0043231//intracellular membrane-bounded organelle	-	GO:0000460//maturation of 5.8S rRNA;GO:0000470//maturation of LSU-rRNA
ENSMUSG00000025213	62	36	49	87	111	92	1.82	1.17	1.58	3.13	3.75	2.82	1.52333333333333	3.23333333333333	1.08579058201642	0.000569266102935043	0.00883795459117416	Kazald1	Kazal-type serine peptidase inhibitor domain 1 [Source:MGI Symbol;Acc:MGI:2147606]	-	-	-	-	GO:0005576//extracellular region;GO:0005614//interstitial matrix;GO:0031012//extracellular matrix	GO:0005515//protein binding;GO:0005520//insulin-like growth factor binding	GO:0001503//ossification;GO:0001558//regulation of cell growth;GO:0007275//multicellular organism development;GO:0030154//cell differentiation;GO:0030198//extracellular matrix organization
ENSMUSG00000041737	17	68	16	71	150	203	0.47	3.35	0.72	2.60	4.96	5.54	1.51333333333333	4.36666666666667	1.5288026091339	0.000574677523506365	0.00891316904554694	Tmem45b	transmembrane protein 45b [Source:MGI Symbol;Acc:MGI:2384574]	-	-	-	-	GO:0005575//cellular_component;GO:0016020//membrane;GO:0016021//integral component of membrane	GO:0003674//molecular_function	GO:0008150//biological_process
ENSMUSG00000095571	2452	3199	1999	232	1016	506	243.74	369.56	219.49	28.44	117.11	52.91	277.596666666667	66.1533333333333	-2.06910448643688	0.00060459476930013	0.0092225624993047	Ighv5-17	immunoglobulin heavy variable 5-17 [Source:MGI Symbol;Acc:MGI:4439533]	Environmental Information Processing;Human Diseases;Human Diseases;Environmental Information Processing;Cellular Processes;Human Diseases;Human Diseases;Environmental Information Processing;Human Diseases;Human Diseases;Human Diseases;Environmental Information Processing;Organismal Systems;Human Diseases;Human Diseases;Organismal Systems;Organismal Systems;Human Diseases;Organismal Systems;Human …	Signal transduction;Infectious diseases;Infectious diseases;Signal transduction;Transport and catabolism;Cancers;Infectious diseases;Signal transduction;Immune diseases;Infectious diseases;Infectious diseases;Signal transduction;Immune system;Immune diseases;Cardiovascular diseases;Immune system;Immune system;Cardiovascular diseases;Immune system;Immune diseases;Infectious diseases;Immune system;…	ko04151//PI3K-Akt signaling pathway;ko05169//Epstein-Barr virus infection;ko05130//Pathogenic Escherichia coli infection;ko04020//Calcium signaling pathway;ko04145//Phagosome;ko05202//Transcriptional misregulation in cancers;ko05152//Tuberculosis;ko04072//Phospholipase D signaling pathway;ko05322//Systemic lupus erythematosus;ko05150//Staphylococcus aureus infection;ko05146//Amoebiasis;ko04064//N…	K06856;K06856;K06856;K06856;K06856;K06856;K06856;K06856;K06856;K06856;K06856;K06856;K06856;K06856;K06856;K06856;K06856;K06856;K06856;K06856;K06856;K06856;K06856;K06856;K06856;K06856;K06856	GO:0009897//external side of plasma membrane;GO:0042571//immunoglobulin complex, circulating	GO:0003823//antigen binding;GO:0034987//immunoglobulin receptor binding	GO:0006910//phagocytosis, recognition;GO:0006911//phagocytosis, engulfment;GO:0006958//complement activation, classical pathway;GO:0042742//defense response to bacterium;GO:0045087//innate immune response;GO:0050853//B cell receptor signaling pathway;GO:0050871//positive regulation of B cell activation
ENSMUSG00000078810	15	12	21	42	41	47	0.11	0.10	0.30	0.35	0.51	0.60	0.17	0.486666666666667	1.51739921690852	0.000614184991664178	0.0093326447960411	Gp6	glycoprotein 6 (platelet) [Source:MGI Symbol;Acc:MGI:1889810]	Organismal Systems;Environmental Information Processing	Immune system;Signaling molecules and interaction	ko04611//Platelet activation;ko04512//ECM-receptor interaction	K06264;K06264	GO:0005886//plasma membrane;GO:0005887//integral component of plasma membrane;GO:0016020//membrane;GO:0016021//integral component of membrane;GO:0097197//tetraspanin-enriched microdomain	GO:0005518//collagen binding;GO:0038064//collagen receptor activity	GO:0007596//blood coagulation;GO:0007599//hemostasis;GO:0038063//collagen-activated tyrosine kinase receptor signaling pathway;GO:0038065//collagen-activated signaling pathway
ENSMUSG00000058755	385	62	152	42	58	66	6.83	1.28	2.98	0.91	1.20	1.23	3.69666666666667	1.11333333333333	-1.73133935768766	0.000616817250821088	0.00936179220196223	Osm	oncostatin M [Source:MGI Symbol;Acc:MGI:104749]	Environmental Information Processing;Environmental Information Processing;Environmental Information Processing	Signal transduction;Signaling molecules and interaction;Signal transduction	ko04151//PI3K-Akt signaling pathway;ko04060//Cytokine-cytokine receptor interaction;ko04630//Jak-STAT signaling pathway	K05418;K05418;K05418	GO:0005576//extracellular region;GO:0005615//extracellular space	GO:0005125//cytokine activity;GO:0005147//oncostatin-M receptor binding;GO:0008083//growth factor activity	GO:0006955//immune response;GO:0007260//tyrosine phosphorylation of STAT protein;GO:0007422//peripheral nervous system development;GO:0008284//positive regulation of cell proliferation;GO:0009408//response to heat;GO:0014068//positive regulation of phosphatidylinositol 3-kinase signaling;GO:0033138//positive regulation of peptidyl-serine phosphorylation;GO:0038165//oncostatin-M-mediated signaling…
ENSMUSG00000076934	862	1604	1573	134	316	566	88.80	191.91	178.89	17.02	37.79	61.33	153.2	38.7133333333333	-1.98451385883079	0.000643459417052403	0.00969318606511795	Iglv1	immunoglobulin lambda variable 1 [Source:MGI Symbol;Acc:MGI:96530]	-	-	-	-	GO:0005615//extracellular space	-	GO:0002377//immunoglobulin production;GO:0006955//immune response
ENSMUSG00000031202	34	59	53	18	14	16	0.40	0.81	0.69	0.26	0.19	0.20	0.633333333333333	0.216666666666667	-1.54748779530249	0.000653612383728889	0.00979920110477049	Rab39b	RAB39B, member RAS oncogene family [Source:MGI Symbol;Acc:MGI:1915040]	Cellular Processes	Transport and catabolism	ko04140//Autophagy - animal	K07925	GO:0005794//Golgi apparatus;GO:0005886//plasma membrane;GO:0012505//endomembrane system;GO:0016020//membrane;GO:0030659//cytoplasmic vesicle membrane;GO:0031410//cytoplasmic vesicle;GO:0031982//vesicle;GO:0043005//neuron projection	GO:0000166//nucleotide binding;GO:0003924//GTPase activity;GO:0005515//protein binding;GO:0005525//GTP binding;GO:0031489//myosin V binding	GO:0006886//intracellular protein transport;GO:0006914//autophagy;GO:0010506//regulation of autophagy;GO:0015031//protein transport;GO:0016192//vesicle-mediated transport;GO:0032482//Rab protein signal transduction;GO:0050808//synapse organization
ENSMUSG00000053318	194	374	231	47	118	149	4.71	10.55	6.19	1.41	3.32	3.81	7.15	2.84666666666667	-1.32866967276642	0.000660838950514089	0.00989810873784292	Slamf8	SLAM family member 8 [Source:MGI Symbol;Acc:MGI:1921998]	-	-	-	-	GO:0016020//membrane;GO:0016021//integral component of membrane	-	-
ENSMUSG00000078922	896	1823	1917	264	519	684	12.79	30.21	30.31	4.65	8.58	10.26	24.4366666666667	7.83	-1.64196329219036	0.000665069590425059	0.00994253749868337	Tgtp1	T cell specific GTPase 1 [Source:MGI Symbol;Acc:MGI:98734]	Environmental Information Processing	Signal transduction	ko04668//TNF signaling pathway	K17072	GO:0005737//cytoplasm;GO:0005783//endoplasmic reticulum;GO:0005789//endoplasmic reticulum membrane;GO:0005794//Golgi apparatus;GO:0016020//membrane	GO:0000166//nucleotide binding;GO:0003924//GTPase activity;GO:0005525//GTP binding;GO:0016787//hydrolase activity	GO:0002376//immune system process;GO:0006952//defense response;GO:0006955//immune response;GO:0009615//response to virus;GO:0009617//response to bacterium;GO:0034341//response to interferon-gamma;GO:0035455//response to interferon-alpha;GO:0035458//cellular response to interferon-beta;GO:0045087//innate immune response
ENSMUSG00000118219	24	31	18	1	7	4	0.18	0.28	0.15	0.01	0.06	0.03	0.203333333333333	0.0333333333333333	-2.60880924267552	0.000683404615742501	0.0101686498725984	Gm29695	predicted gene, 29695 [Source:MGI Symbol;Acc:MGI:5588854]	-	-	-	-	-	-	-
ENSMUSG00000063193	610	1155	514	317	285	475	8.67	19.21	8.10	5.57	4.70	7.21	11.9933333333333	5.82666666666667	-1.04149000175088	0.000722329117195202	0.0106868015297544	Cd300lb	CD300 molecule like family member B [Source:MGI Symbol;Acc:MGI:2685099]	-	-	-	-	GO:0005886//plasma membrane;GO:0016020//membrane;GO:0016021//integral component of membrane	GO:0005515//protein binding	GO:0002376//immune system process;GO:0002446//neutrophil mediated immunity;GO:0033005//positive regulation of mast cell activation;GO:0071222//cellular response to lipopolysaccharide
ENSMUSG00000035458	346	120	163	299	513	535	15.28	6.16	7.99	16.29	26.26	24.85	9.81	22.4666666666667	1.19546104912883	0.00076833646250234	0.0112093019905142	Tnni3	troponin I, cardiac 3 [Source:MGI Symbol;Acc:MGI:98783]	Human Diseases;Environmental Information Processing;Organismal Systems;Human Diseases;Organismal Systems	Cardiovascular diseases;Signal transduction;Circulatory system;Cardiovascular diseases;Circulatory system	ko05414//Dilated cardiomyopathy (DCM);ko04024//cAMP signaling pathway;ko04261//Adrenergic signaling in cardiomyocytes;ko05410//Hypertrophic cardiomyopathy (HCM);ko04260//Cardiac muscle contraction	K12044;K12044;K12044;K12044;K12044	GO:0005623//cell;GO:0005737//cytoplasm;GO:0005861//troponin complex;GO:0030016//myofibril;GO:0030017//sarcomere;GO:0043292//contractile fiber;GO:0097512//cardiac myofibril;GO:1990584//cardiac Troponin complex	GO:0003779//actin binding;GO:0019855//calcium channel inhibitor activity;GO:0019901//protein kinase binding;GO:0019904//protein domain specific binding;GO:0030172//troponin C binding;GO:0031014//troponin T binding;GO:0046872//metal ion binding;GO:0048306//calcium-dependent protein binding;GO:0051015//actin filament binding	GO:0001570//vasculogenesis;GO:0001980//regulation of systemic arterial blood pressure by ischemic conditions;GO:0003009//skeletal muscle contraction;GO:0006874//cellular calcium ion homeostasis;GO:0006936//muscle contraction;GO:0006937//regulation of muscle contraction;GO:0006940//regulation of smooth muscle contraction;GO:0006941//striated muscle contraction;GO:0007507//heart development;GO:0010…
ENSMUSG00000035356	1245	441	1608	347	317	280	13.84	5.67	19.72	8.71	4.20	3.34	13.0766666666667	5.41666666666667	-1.27151761727392	0.000789374344138646	0.0114842648568626	Nfkbiz	nuclear factor of kappa light polypeptide gene enhancer in B cells inhibitor, zeta [Source:MGI Symbol;Acc:MGI:1931595]	Human Diseases	Cancers	ko05202//Transcriptional misregulation in cancers	K14242	GO:0005634//nucleus;GO:0016607//nuclear speck;GO:0036464//cytoplasmic ribonucleoprotein granule	GO:0005515//protein binding	GO:0006357//regulation of transcription from RNA polymerase II promoter;GO:0006954//inflammatory response;GO:0050729//positive regulation of inflammatory response;GO:0050852//T cell receptor signaling pathway;GO:2000321//positive regulation of T-helper 17 cell differentiation
ENSMUSG00000056494	4	16	20	0	0	1	0.03	0.16	0.19	0.00	0.00	0.01	0.126666666666667	0.00333333333333333	-5.24792751344359	0.000826708879679893	0.0118548868236362	Cngb3	cyclic nucleotide gated channel beta 3 [Source:MGI Symbol;Acc:MGI:1353562]	Environmental Information Processing	Signal transduction	ko04024//cAMP signaling pathway	K04953	GO:0001750//photoreceptor outer segment;GO:0005886//plasma membrane;GO:0016020//membrane;GO:0016021//integral component of membrane;GO:1902495//transmembrane transporter complex	GO:0000166//nucleotide binding;GO:0005222//intracellular cAMP activated cation channel activity;GO:0005223//intracellular cGMP activated cation channel activity;GO:0005515//protein binding;GO:0030553//cGMP binding	GO:0006811//ion transport;GO:0006812//cation transport;GO:0007601//visual perception;GO:0050896//response to stimulus;GO:0098655//cation transmembrane transport
ENSMUSG00000073208	56	59	61	7	25	26	1.93	3.11	3.01	0.34	1.24	0.95	2.68333333333333	0.843333333333333	-1.66985139830767	0.000831431887624465	0.0118872084515181	Speer4c	spermatogenesis associated glutamate (E)-rich protein 4C [Source:MGI Symbol;Acc:MGI:1914023]	-	-	-	-	GO:0005575//cellular_component	GO:0003674//molecular_function	GO:0008150//biological_process
ENSMUSG00000017002	9471	9269	7699	1834	4997	2817	525.46	605.19	469.42	134.23	341.00	167.96	533.356666666667	214.396666666667	-1.31481814014511	0.000856458324111084	0.0121785895689828	Slpi	secretory leukocyte peptidase inhibitor [Source:MGI Symbol;Acc:MGI:109297]	-	-	-	-	GO:0005576//extracellular region;GO:0005615//extracellular space;GO:0005794//Golgi apparatus	GO:0003677//DNA binding;GO:0003729//mRNA binding;GO:0004866//endopeptidase inhibitor activity;GO:0004867//serine-type endopeptidase inhibitor activity;GO:0005515//protein binding;GO:0008233//peptidase activity;GO:0019899//enzyme binding;GO:0030414//peptidase inhibitor activity	GO:0002376//immune system process;GO:0006508//proteolysis;GO:0006955//immune response;GO:0010466//negative regulation of peptidase activity;GO:0010951//negative regulation of endopeptidase activity;GO:0019731//antibacterial humoral response;GO:0032091//negative regulation of protein binding;GO:0032496//response to lipopolysaccharide;GO:0035821//modification of morphology or physiology of other or…
ENSMUSG00000059832	0	0	7	13	54	27	0.00	0.00	0.11	0.24	0.92	0.42	0.0366666666666667	0.526666666666667	3.8443491295398	0.000858840117554176	0.0122014259519192	Kprp	keratinocyte expressed, proline-rich [Source:MGI Symbol;Acc:MGI:1920981]	-	-	-	-	GO:0005737//cytoplasm	GO:0003674//molecular_function	GO:0008150//biological_process
ENSMUSG00000020581	103	117	77	22	49	53	5.29	6.98	4.37	1.39	2.92	2.86	5.54666666666667	2.39	-1.21461040943919	0.00087819501605289	0.0124314788636038	Agr2	anterior gradient 2 [Source:MGI Symbol;Acc:MGI:1344405]	-	-	-	-	GO:0005576//extracellular region;GO:0005615//extracellular space;GO:0005739//mitochondrion;GO:0005783//endoplasmic reticulum	GO:0002162//dystroglycan binding;GO:0005154//epidermal growth factor receptor binding;GO:0042802//identical protein binding	GO:0010628//positive regulation of gene expression;GO:0010811//positive regulation of cell-substrate adhesion;GO:0045742//positive regulation of epidermal growth factor receptor signaling pathway;GO:0048546//digestive tract morphogenesis;GO:0048639//positive regulation of developmental growth;GO:0060480//lung goblet cell differentiation;GO:0060548//negative regulation of cell death;GO:0070254//mu…
ENSMUSG00000029380	106	59	212	41	33	52	4.48	2.90	9.89	2.14	1.62	2.31	5.75666666666667	2.02333333333333	-1.50849966127325	0.000885365331450253	0.0125091959461757	Cxcl1	chemokine (C-X-C motif) ligand 1 [Source:MGI Symbol;Acc:MGI:108068]	Environmental Information Processing;Human Diseases;Environmental Information Processing;Organismal Systems;Human Diseases;Human Diseases;Organismal Systems;Environmental Information Processing;Organismal Systems;Environmental Information Processing;Human Diseases;Human Diseases	Signaling molecules and interaction;Infectious diseases;Signal transduction;Immune system;Immune diseases;Infectious diseases;Immune system;Signal transduction;Immune system;Signaling molecules and interaction;Infectious diseases;Infectious diseases	ko04060//Cytokine-cytokine receptor interaction;ko05146//Amoebiasis;ko04064//NF-kappa B signaling pathway;ko04621//NOD-like receptor signaling pathway;ko05323//Rheumatoid arthritis;ko05167//Kaposi sarcoma-associated herpesvirus infection;ko04062//Chemokine signaling pathway;ko04668//TNF signaling pathway;ko04657//IL-17 signaling pathway;ko04061//Viral protein interaction with cytokine and cytokin…	K05505;K05505;K05505;K05505;K05505;K05505;K05505;K05505;K05505;K05505;K05505;K05505	GO:0005576//extracellular region;GO:0005615//extracellular space;GO:0005623//cell	GO:0005125//cytokine activity;GO:0008009//chemokine activity;GO:0008083//growth factor activity;GO:0045236//CXCR chemokine receptor binding	GO:0002237//response to molecule of bacterial origin;GO:0002526//acute inflammatory response;GO:0006935//chemotaxis;GO:0006952//defense response;GO:0006954//inflammatory response;GO:0006955//immune response;GO:0007165//signal transduction;GO:0007204//positive regulation of cytosolic calcium ion concentration;GO:0010765//positive regulation of sodium ion transport;GO:0030593//neutrophil chemotaxis…
ENSMUSG00000070570	31	15	16	36	70	65	0.43	0.36	0.32	0.70	1.20	0.94	0.37	0.946666666666667	1.35533125315458	0.000891962233778414	0.0125697939521802	Slc17a7	solute carrier family 17 (sodium-dependent inorganic phosphate cotransporter), member 7 [Source:MGI Symbol;Acc:MGI:1920211]	Organismal Systems;Organismal Systems;Organismal Systems;Human Diseases	Nervous system;Nervous system;Nervous system;Substance dependence	ko04723//Retrograde endocannabinoid signaling;ko04724//Glutamatergic synapse;ko04721//Synaptic vesicle cycle;ko05033//Nicotine addiction	K12302;K12302;K12302;K12302	GO:0005623//cell;GO:0008021//synaptic vesicle;GO:0016020//membrane;GO:0016021//integral component of membrane;GO:0030054//cell junction;GO:0030285//integral component of synaptic vesicle membrane;GO:0030672//synaptic vesicle membrane;GO:0031410//cytoplasmic vesicle;GO:0043005//neuron projection;GO:0043229//intracellular organelle;GO:0044300//cerebellar mossy fiber;GO:0045202//synapse;GO:0048786//…	GO:0005313//L-glutamate transmembrane transporter activity;GO:0005315//inorganic phosphate transmembrane transporter activity;GO:0005326//neurotransmitter transporter activity;GO:0005436//sodium:phosphate symporter activity;GO:0008068//extracellular-glutamate-gated chloride channel activity;GO:0015293//symporter activity;GO:0015319//sodium:inorganic phosphate symporter activity;GO:0022857//transm…	GO:0003407//neural retina development;GO:0006811//ion transport;GO:0006814//sodium ion transport;GO:0006817//phosphate ion transport;GO:0006820//anion transport;GO:0006836//neurotransmitter transport;GO:0007268//synaptic transmission;GO:0007420//brain development;GO:0007616//long-term memory;GO:0015813//L-glutamate transport;GO:0035249//synaptic transmission, glutamatergic;GO:0035725//sodium ion …
ENSMUSG00000022650	31	42	36	5	10	16	1.79	2.82	2.30	0.36	0.67	0.97	2.30333333333333	0.666666666666667	-1.78868571061353	0.000914032006246076	0.0128005176867605	Retnlb	resistin like beta [Source:MGI Symbol;Acc:MGI:1888505]	-	-	-	-	GO:0005576//extracellular region	GO:0005179//hormone activity	GO:0007165//signal transduction
ENSMUSG00000073530	48	37	43	76	70	99	0.32	0.18	0.20	0.57	0.40	0.99	0.233333333333333	0.653333333333333	1.48542682717024	0.000952109971951936	0.0132277681350602	Pappa2	pappalysin 2 [Source:MGI Symbol;Acc:MGI:3051647]	-	-	-	-	GO:0005829//cytosol;GO:0016324//apical plasma membrane	GO:0004222//metalloendopeptidase activity;GO:0005515//protein binding;GO:0008237//metallopeptidase activity;GO:0008270//zinc ion binding	GO:0006508//proteolysis;GO:0009651//response to salt stress;GO:0060349//bone morphogenesis
ENSMUSG00000026983	0	0	1	0	55	16	0.00	0.00	0.05	0.00	1.54	0.38	0.0166666666666667	0.64	5.26303440583379	0.00100177726950273	0.0137346175153328	Il1f5	interleukin 1 family, member 5 (delta) [Source:MGI Symbol;Acc:MGI:1859325]	Environmental Information Processing	Signaling molecules and interaction	ko04060//Cytokine-cytokine receptor interaction	K05483	GO:0005576//extracellular region;GO:0005615//extracellular space	GO:0005125//cytokine activity;GO:0005149//interleukin-1 receptor binding;GO:0005152//interleukin-1 receptor antagonist activity	GO:0001960//negative regulation of cytokine-mediated signaling pathway;GO:0002376//immune system process;GO:0002437//inflammatory response to antigenic stimulus;GO:0006954//inflammatory response;GO:0006955//immune response;GO:0007165//signal transduction;GO:0019732//antifungal humoral response;GO:0032700//negative regulation of interleukin-17 production;GO:0032715//negative regulation of interleu…
ENSMUSG00000022099	180	145	246	94	47	112	2.83	2.64	4.28	1.79	0.84	1.77	3.25	1.46666666666667	-1.14789869511231	0.00102163913337089	0.0139715814352383	Dmtn	dematin actin binding protein [Source:MGI Symbol;Acc:MGI:99670]	-	-	-	-	GO:0005737//cytoplasm;GO:0005829//cytosol;GO:0005856//cytoskeleton;GO:0005884//actin filament;GO:0005886//plasma membrane;GO:0012505//endomembrane system;GO:0014069//postsynaptic density;GO:0014731//spectrin-associated cytoskeleton;GO:0015629//actin cytoskeleton;GO:0016020//membrane;GO:0030863//cortical cytoskeleton;GO:0031095//platelet dense tubular network membrane;GO:0031253//cell projection m…	GO:0003779//actin binding;GO:0005102//receptor binding;GO:0030507//spectrin binding;GO:0043621//protein self-association;GO:0051015//actin filament binding	GO:0007010//cytoskeleton organization;GO:0008360//regulation of cell shape;GO:0010591//regulation of lamellipodium assembly;GO:0010763//positive regulation of fibroblast migration;GO:0010801//negative regulation of peptidyl-threonine phosphorylation;GO:0010812//negative regulation of cell-substrate adhesion;GO:0030032//lamellipodium assembly;GO:0030036//actin cytoskeleton organization;GO:0030194/…
ENSMUSG00000070524	17	24	13	2	0	4	0.53	0.87	0.45	0.08	0.00	0.13	0.616666666666667	0.07	-3.13906403773755	0.00104819118673148	0.0142233846365194	Fcrlb	Fc receptor-like B [Source:MGI Symbol;Acc:MGI:3576487]	-	-	-	-	GO:0005737//cytoplasm;GO:0005783//endoplasmic reticulum	GO:0003674//molecular_function	GO:0050777//negative regulation of immune response
ENSMUSG00000067341	138	144	73	20	66	37	1.64	1.99	0.96	0.29	0.91	0.46	1.53	0.553333333333333	-1.46731091206688	0.00105063451678539	0.0142442491771412	H2-Eb2	histocompatibility 2, class II antigen E beta2 [Source:MGI Symbol;Acc:MGI:95902]	Human Diseases;Human Diseases;Cellular Processes;Human Diseases;Human Diseases;Human Diseases;Human Diseases;Human Diseases;Organismal Systems;Human Diseases;Human Diseases;Human Diseases;Human Diseases;Human Diseases;Environmental Information Processing;Organismal Systems;Human Diseases;Human Diseases;Organismal Systems;Organismal Systems;Organismal Systems;Human Diseases;Human Diseases;Human Di…	Infectious diseases;Infectious diseases;Transport and catabolism;Infectious diseases;Immune diseases;Infectious diseases;Infectious diseases;Immune diseases;Immune system;Cardiovascular diseases;Immune diseases;Infectious diseases;Infectious diseases;Immune diseases;Signaling molecules and interaction;Immune system;Immune diseases;Infectious diseases;Immune system;Immune system;Immune system;Endo…	ko05168//Herpes simplex infection;ko05169//Epstein-Barr virus infection;ko04145//Phagosome;ko05152//Tuberculosis;ko05322//Systemic lupus erythematosus;ko05150//Staphylococcus aureus infection;ko05166//HTLV-I infection;ko05323//Rheumatoid arthritis;ko04640//Hematopoietic cell lineage;ko05416//Viral myocarditis;ko05320//Autoimmune thyroid disease;ko05140//Leishmaniasis;ko05164//Influenza A;ko05330/…	K06752;K06752;K06752;K06752;K06752;K06752;K06752;K06752;K06752;K06752;K06752;K06752;K06752;K06752;K06752;K06752;K06752;K06752;K06752;K06752;K06752;K06752;K06752;K06752	GO:0016020//membrane;GO:0016021//integral component of membrane;GO:0042613//MHC class II protein complex	-	GO:0006955//immune response;GO:0019882//antigen processing and presentation
ENSMUSG00000061397	224	97	116	209	326	303	8.13	3.58	4.87	10.01	16.72	14.27	5.52666666666667	13.6666666666667	1.30617990289706	0.0010738753481425	0.0144596212330797	Krt79	keratin 79 [Source:MGI Symbol;Acc:MGI:2385030]	-	-	-	-	GO:0005882//intermediate filament;GO:0045095//keratin filament	GO:0019899//enzyme binding	-
ENSMUSG00000003949	444	175	148	729	584	406	3.73	1.57	1.35	7.16	5.75	3.73	2.21666666666667	5.54666666666667	1.32322918775254	0.00107849273036089	0.0145093714032384	Hlf	hepatic leukemia factor [Source:MGI Symbol;Acc:MGI:96108]	Organismal Systems	Environmental adaptation	ko04711//Circadian rhythm - fly	K09057	GO:0005634//nucleus;GO:0005654//nucleoplasm	GO:0000977//RNA polymerase II regulatory region sequence-specific DNA binding;GO:0001228//transcriptional activator activity, RNA polymerase II transcription regulatory region sequence-specific binding;GO:0003677//DNA binding;GO:0003700//transcription factor activity, sequence-specific DNA binding;GO:0043565//sequence-specific DNA binding	GO:0006355//regulation of transcription, DNA-templated;GO:0006357//regulation of transcription from RNA polymerase II promoter;GO:0035914//skeletal muscle cell differentiation;GO:0045944//positive regulation of transcription from RNA polymerase II promoter;GO:0048511//rhythmic process
ENSMUSG00000076598	1238	3793	6568	185	983	381	138.85	494.35	813.52	25.57	127.83	44.93	482.24	66.11	-2.86681090224934	0.00109683538099831	0.0146872259764737	Igkv3-7	immunoglobulin kappa variable 3-7 [Source:MGI Symbol;Acc:MGI:1330852]	-	-	-	-	GO:0005615//extracellular space	-	GO:0002377//immunoglobulin production;GO:0006955//immune response
ENSMUSG00000095789	23	13	20	38	44	57	1.22	0.73	1.02	2.74	2.31	3.18	0.99	2.74333333333333	1.47042949962086	0.00114960279955462	0.0151931119568029	Nupr1l	nuclear protein transcriptional regulator 1 like [Source:MGI Symbol;Acc:MGI:1923099]	-	-	-	-	GO:0005634//nucleus	-	GO:0000122//negative regulation of transcription from RNA polymerase II promoter;GO:0006357//regulation of transcription from RNA polymerase II promoter;GO:0006974//cellular response to DNA damage stimulus;GO:0007049//cell cycle;GO:0007050//cell cycle arrest;GO:0008285//negative regulation of cell proliferation;GO:0009267//cellular response to starvation;GO:0045786//negative regulation of cell cy…
ENSMUSG00000091844	24	29	23	8	6	4	0.06	0.07	0.05	0.04	0.02	0.01	0.06	0.0233333333333333	-1.36257007938471	0.0011695776183978	0.015379554518848	Gm8251	predicted gene 8251 [Source:MGI Symbol;Acc:MGI:3647616]	-	-	-	-	GO:0005575//cellular_component;GO:0016020//membrane;GO:0016021//integral component of membrane	GO:0003674//molecular_function	GO:0008150//biological_process
ENSMUSG00000025746	49	20	122	17	14	8	1.71	0.88	4.35	0.46	0.50	0.22	2.31333333333333	0.393333333333333	-2.55614880321642	0.001185360389094	0.0155351356994012	Il6	interleukin 6 [Source:MGI Symbol;Acc:MGI:96559]	Human Diseases;Human Diseases;Environmental Information Processing;Human Diseases;Human Diseases;Human Diseases;Human Diseases;Environmental Information Processing;Human Diseases;Human Diseases;Human Diseases;Human Diseases;Human Diseases;Organismal Systems;Human Diseases;Organismal Systems;Human Diseases;Human Diseases;Environmental Information Processing;Cellular Processes;Organismal Systems;Hu…	Cancers;Infectious diseases;Signal transduction;Infectious diseases;Neurodegenerative diseases;Infectious diseases;Cancers;Signaling molecules and interaction;Infectious diseases;Infectious diseases;Infectious diseases;Infectious diseases;Infectious diseases;Immune system;Immune diseases;Immune system;Infectious diseases;Infectious diseases;Signal transduction;Cell growth and death;Immune system;…	ko05200//Pathways in cancer;ko05168//Herpes simplex infection;ko04151//PI3K-Akt signaling pathway;ko05169//Epstein-Barr virus infection;ko05010//Alzheimer disease;ko05130//Pathogenic Escherichia coli infection;ko05202//Transcriptional misregulation in cancers;ko04060//Cytokine-cytokine receptor interaction;ko05152//Tuberculosis;ko05163//Human cytomegalovirus infection;ko05166//HTLV-I infection;ko…	K05405;K05405;K05405;K05405;K05405;K05405;K05405;K05405;K05405;K05405;K05405;K05405;K05405;K05405;K05405;K05405;K05405;K05405;K05405;K05405;K05405;K05405;K05405;K05405;K05405;K05405;K05405;K05405;K05405;K05405;K05405;K05405;K05405;K05405;K05405;K05405;K05405;K05405;K05405;K05405;K05405;K05405;K05405;K05405;K05405;K05405;K05405	GO:0005576//extracellular region;GO:0005615//extracellular space;GO:0005623//cell;GO:0005737//cytoplasm;GO:0005896//interleukin-6 receptor complex;GO:0009897//external side of plasma membrane	GO:0005102//receptor binding;GO:0005125//cytokine activity;GO:0005138//interleukin-6 receptor binding;GO:0005515//protein binding;GO:0008083//growth factor activity	GO:0001781//neutrophil apoptotic process;GO:0001878//response to yeast;GO:0002262//myeloid cell homeostasis;GO:0002384//hepatic immune response;GO:0002526//acute inflammatory response;GO:0002675//positive regulation of acute inflammatory response;GO:0006469//negative regulation of protein kinase activity;GO:0006953//acute-phase response;GO:0006954//inflammatory response;GO:0006955//immune respons…
ENSMUSG00000102439	0	1	2	6	18	20	0.00	0.06	0.07	0.23	0.60	0.47	0.0433333333333333	0.433333333333333	3.32192809488736	0.00120160413388273	0.0156840733690702	Flg	filaggrin [Source:MGI Symbol;Acc:MGI:95553]	-	-	-	-	-	GO:0005198//structural molecule activity;GO:0005509//calcium ion binding;GO:0046914//transition metal ion binding	-
ENSMUSG00000047098	984	492	245	246	247	183	11.52	6.61	3.13	3.51	3.47	2.22	7.08666666666667	3.06666666666667	-1.20843583058673	0.0012700157479354	0.0164310675962064	Rnf31	ring finger protein 31 [Source:MGI Symbol;Acc:MGI:1934704]	Human Diseases;Organismal Systems;Cellular Processes	Infectious diseases;Immune system;Cell growth and death	ko05131//Shigellosis;ko04621//NOD-like receptor signaling pathway;ko04217//Necroptosis	K11974;K11974;K11974	GO:0005737//cytoplasm;GO:0005829//cytosol;GO:0009898//cytoplasmic side of plasma membrane;GO:0035631//CD40 receptor complex;GO:0071797//LUBAC complex	GO:0004842//ubiquitin-protein transferase activity;GO:0005515//protein binding;GO:0016740//transferase activity;GO:0031625//ubiquitin protein ligase binding;GO:0043130//ubiquitin binding;GO:0046872//metal ion binding	GO:0000209//protein polyubiquitination;GO:0016567//protein ubiquitination;GO:0023035//CD40 signaling pathway;GO:0043123//positive regulation of I-kappaB kinase/NF-kappaB signaling;GO:0050852//T cell receptor signaling pathway;GO:0051092//positive regulation of NF-kappaB transcription factor activity;GO:0060546//negative regulation of necroptotic process;GO:0097039//protein linear polyubiquitinati…
ENSMUSG00000022034	33	45	40	11	17	13	0.46	0.72	0.61	0.19	0.27	0.19	0.596666666666667	0.216666666666667	-1.4614479642358	0.00136868638734163	0.017401237521198	Esco2	establishment of sister chromatid cohesion N-acetyltransferase 2 [Source:MGI Symbol;Acc:MGI:1919238]	-	-	-	-	GO:0000785//chromatin;GO:0001741//XY body;GO:0005634//nucleus;GO:0005654//nucleoplasm;GO:0005694//chromosome;GO:0005794//Golgi apparatus;GO:0010369//chromocenter;GO:0030054//cell junction;GO:0031618//nuclear pericentric heterochromatin;GO:0035861//site of double-strand break	GO:0004468//lysine N-acetyltransferase activity, acting on acetyl phosphate as donor;GO:0016407//acetyltransferase activity;GO:0016740//transferase activity;GO:0016746//transferase activity, transferring acyl groups;GO:0046872//metal ion binding	GO:0002244//hematopoietic progenitor cell differentiation;GO:0006275//regulation of DNA replication;GO:0006302//double-strand break repair;GO:0007049//cell cycle;GO:0007059//chromosome segregation;GO:0007062//sister chromatid cohesion;GO:0034421//post-translational protein acetylation;GO:0071168//protein localization to chromatin
ENSMUSG00000062007	85	130	109	48	62	43	1.88	3.33	2.66	1.31	1.61	1.00	2.62333333333333	1.30666666666667	-1.00550998139227	0.00141775607195571	0.0178949034860734	Hsh2d	hematopoietic SH2 domain containing [Source:MGI Symbol;Acc:MGI:2676364]	-	-	-	-	GO:0005737//cytoplasm;GO:0005739//mitochondrion;GO:0005829//cytosol	GO:0005070//SH3/SH2 adaptor activity;GO:0035591//signaling adaptor activity	GO:0002903//negative regulation of B cell apoptotic process;GO:0007165//signal transduction;GO:0009967//positive regulation of signal transduction;GO:0042110//T cell activation;GO:0051902//negative regulation of mitochondrial depolarization
ENSMUSG00000024672	340	420	400	86	123	307	11.58	16.35	14.12	3.41	4.36	10.51	14.0166666666667	6.09333333333333	-1.20183973008444	0.00142111150311727	0.0179228713789297	Ms4a7	membrane-spanning 4-domains, subfamily A, member 7 [Source:MGI Symbol;Acc:MGI:1918846]	-	-	-	-	GO:0005575//cellular_component;GO:0016020//membrane;GO:0016021//integral component of membrane	GO:0003674//molecular_function	GO:0008150//biological_process
ENSMUSG00000027075	62	60	36	76	112	131	1.00	1.51	0.63	1.80	2.81	2.19	1.04666666666667	2.26666666666667	1.11477018724607	0.0014731338781751	0.0184458411640604	Slc43a1	solute carrier family 43, member 1 [Source:MGI Symbol;Acc:MGI:1931352]	-	-	-	-	GO:0016020//membrane;GO:0016021//integral component of membrane	GO:0015175//neutral amino acid transmembrane transporter activity;GO:0015179//L-amino acid transmembrane transporter activity	GO:0006865//amino acid transport;GO:0015804//neutral amino acid transport;GO:0015807//L-amino acid transport;GO:0055085//transmembrane transport;GO:1902475//L-alpha-amino acid transmembrane transport
ENSMUSG00000062488	794	2605	2439	578	594	594	15.99	60.94	54.23	14.35	13.87	12.58	43.72	13.6	-1.6846867495342	0.00152913454319976	0.0189408318831783	Ifit3b	interferon-induced protein with tetratricopeptide repeats 3B [Source:MGI Symbol;Acc:MGI:3698419]	-	-	-	-	GO:0005737//cytoplasm;GO:0005739//mitochondrion;GO:0005829//cytosol	GO:0003723//RNA binding;GO:0005515//protein binding;GO:0042802//identical protein binding	GO:0035457//cellular response to interferon-alpha;GO:0051607//defense response to virus
ENSMUSG00000005547	1885	859	749	2909	2863	2560	37.70	20.04	16.55	71.87	66.55	53.88	24.7633333333333	64.1	1.37211883147632	0.00152952606928445	0.0189408318831783	Cyp2a5	cytochrome P450, family 2, subfamily a, polypeptide 5 [Source:MGI Symbol;Acc:MGI:88597]	Metabolism;Metabolism	Global and overview maps;Metabolism of cofactors and vitamins	ko01100//Metabolic pathways;ko00830//Retinol metabolism	K07411;K07411	GO:0016020//membrane;GO:0016021//integral component of membrane	GO:0004497//monooxygenase activity;GO:0005506//iron ion binding;GO:0016491//oxidoreductase activity;GO:0016705//oxidoreductase activity, acting on paired donors, with incorporation or reduction of molecular oxygen;GO:0016712//oxidoreductase activity, acting on paired donors, with incorporation or reduction of molecular oxygen, reduced flavin or flavoprotein as one donor, and incorporation of one …	GO:0055114//oxidation-reduction process
ENSMUSG00000096422	2891	4112	585	463	541	318	290.27	479.81	64.82	57.36	62.94	33.60	278.3	51.3	-2.43961017772455	0.00153282341859138	0.0189518191070649	Igkv12-44	immunoglobulin kappa variable 12-44 [Source:MGI Symbol;Acc:MGI:4439775]	-	-	-	-	GO:0005615//extracellular space	-	GO:0002377//immunoglobulin production;GO:0006955//immune response
ENSMUSG00000024079	984	2528	2089	716	724	602	9.73	28.31	24.11	8.93	8.22	6.14	20.7166666666667	7.76333333333333	-1.41604375172898	0.00159035805793569	0.0195373354005843	Eif2ak2	eukaryotic translation initiation factor 2-alpha kinase 2 [Source:MGI Symbol;Acc:MGI:1353449]	Human Diseases;Human Diseases;Human Diseases;Human Diseases;Human Diseases;Human Diseases;Human Diseases;Cellular Processes;Human Diseases;Genetic Information Processing;Human Diseases	Infectious diseases;Infectious diseases;Infectious diseases;Neurodegenerative diseases;Cancers;Infectious diseases;Infectious diseases;Cell growth and death;Infectious diseases;Folding, sorting and degradation;Infectious diseases	ko05168//Herpes simplex infection;ko05169//Epstein-Barr virus infection;ko05165//Human papillomavirus infection;ko05010//Alzheimer disease;ko05203//Viral carcinogenesis;ko05167//Kaposi sarcoma-associated herpesvirus infection;ko05164//Influenza A;ko04217//Necroptosis;ko05160//Hepatitis C;ko04141//Protein processing in endoplasmic reticulum;ko05162//Measles	K16195;K16195;K16195;K16195;K16195;K16195;K16195;K16195;K16195;K16195;K16195	GO:0005634//nucleus;GO:0005737//cytoplasm;GO:0005829//cytosol;GO:0048471//perinuclear region of cytoplasm	GO:0000166//nucleotide binding;GO:0003723//RNA binding;GO:0003725//double-stranded RNA binding;GO:0004672//protein kinase activity;GO:0004674//protein serine/threonine kinase activity;GO:0004694//eukaryotic translation initiation factor 2alpha kinase activity;GO:0004713//protein tyrosine kinase activity;GO:0004715//non-membrane spanning protein tyrosine kinase activity;GO:0005515//protein binding…	GO:0000186//activation of MAPKK activity;GO:0001819//positive regulation of cytokine production;GO:0002376//immune system process;GO:0006412//translation;GO:0006468//protein phosphorylation;GO:0009615//response to virus;GO:0009636//response to toxic substance;GO:0010998//regulation of translational initiation by eIF2 alpha phosphorylation;GO:0016310//phosphorylation;GO:0017148//negative regulatio…
ENSMUSG00000026166	27	46	22	11	3	7	1.36	2.60	1.19	0.58	0.15	0.38	1.71666666666667	0.37	-2.21401275572048	0.00159136050411067	0.0195373354005843	Ccl20	chemokine (C-C motif) ligand 20 [Source:MGI Symbol;Acc:MGI:1329031]	Environmental Information Processing;Human Diseases;Organismal Systems;Environmental Information Processing;Organismal Systems;Environmental Information Processing	Signaling molecules and interaction;Immune diseases;Immune system;Signal transduction;Immune system;Signaling molecules and interaction	ko04060//Cytokine-cytokine receptor interaction;ko05323//Rheumatoid arthritis;ko04062//Chemokine signaling pathway;ko04668//TNF signaling pathway;ko04657//IL-17 signaling pathway;ko04061//Viral protein interaction with cytokine and cytokine receptor	K14625;K14625;K14625;K14625;K14625;K14625	GO:0005576//extracellular region;GO:0005615//extracellular space	GO:0005125//cytokine activity;GO:0005515//protein binding;GO:0008009//chemokine activity;GO:0031731//CCR6 chemokine receptor binding;GO:0048020//CCR chemokine receptor binding	GO:0002548//monocyte chemotaxis;GO:0006935//chemotaxis;GO:0006954//inflammatory response;GO:0006955//immune response;GO:0007165//signal transduction;GO:0007186//G-protein coupled receptor signaling pathway;GO:0030593//neutrophil chemotaxis;GO:0031640//killing of cells of other organism;GO:0035584//calcium-mediated signaling using intracellular calcium source;GO:0043547//positive regulation of GTP…
ENSMUSG00000041323	25	16	10	3	1	3	0.33	0.40	0.40	0.12	0.05	0.10	0.376666666666667	0.09	-2.06529146025172	0.00169811888332798	0.020559134471208	Ak7	adenylate kinase 7 [Source:MGI Symbol;Acc:MGI:1926051]	Metabolism;Metabolism;Metabolism	Global and overview maps;Nucleotide metabolism;Metabolism of cofactors and vitamins	ko01100//Metabolic pathways;ko00230//Purine metabolism;ko00730//Thiamine metabolism	K00939;K00939;K00939	-	GO:0004017//adenylate kinase activity;GO:0004127//cytidylate kinase activity;GO:0004550//nucleoside diphosphate kinase activity;GO:0005524//ATP binding;GO:0019205//nucleobase-containing compound kinase activity	GO:0006139//nucleobase-containing compound metabolic process;GO:0006165//nucleoside diphosphate phosphorylation;GO:0009142//nucleoside triphosphate biosynthetic process;GO:0046940//nucleoside monophosphate phosphorylation
ENSMUSG00000029641	215	352	443	112	140	239	7.69	14.63	17.49	4.94	5.80	8.99	13.27	6.57666666666667	-1.01273991536779	0.00171978839042487	0.0207575687000859	Rasl11a	RAS-like, family 11, member A [Source:MGI Symbol;Acc:MGI:1916145]	-	-	-	-	GO:0005634//nucleus;GO:0005730//nucleolus;GO:0016020//membrane	GO:0000166//nucleotide binding;GO:0003924//GTPase activity;GO:0005515//protein binding;GO:0005525//GTP binding	GO:0007165//signal transduction;GO:0045943//positive regulation of transcription from RNA polymerase I promoter
ENSMUSG00000027498	59	74	120	3	29	32	0.96	1.14	1.55	0.21	0.39	0.39	1.21666666666667	0.33	-1.88239603368777	0.00172280069117611	0.0207577560264515	Cstf1	cleavage stimulation factor, 3' pre-RNA, subunit 1 [Source:MGI Symbol;Acc:MGI:1914587]	Genetic Information Processing	Translation	ko03015//mRNA surveillance pathway	K14406	GO:0005634//nucleus;GO:0005654//nucleoplasm;GO:0005848//mRNA cleavage stimulating factor complex	GO:0005515//protein binding	GO:0006397//mRNA processing
ENSMUSG00000015665	31	19	10	3	4	3	0.90	0.64	0.32	0.11	0.13	0.09	0.62	0.11	-2.49476469174958	0.00172994741815244	0.0207690086837497	Awat1	acyl-CoA wax alcohol acyltransferase 1 [Source:MGI Symbol;Acc:MGI:3588200]	-	-	-	-	GO:0005575//cellular_component;GO:0005783//endoplasmic reticulum;GO:0005789//endoplasmic reticulum membrane;GO:0016020//membrane;GO:0016021//integral component of membrane	GO:0016740//transferase activity;GO:0016746//transferase activity, transferring acyl groups;GO:0016747//transferase activity, transferring acyl groups other than amino-acyl groups;GO:0047196//long-chain-alcohol O-fatty-acyltransferase activity	GO:0006629//lipid metabolic process;GO:0008150//biological_process
ENSMUSG00000055116	208	325	522	107	168	217	2.90	5.22	8.01	1.83	2.74	3.20	5.37666666666667	2.59	-1.05375993474793	0.0018847406172465	0.0222198768271632	Arntl	aryl hydrocarbon receptor nuclear translocator-like [Source:MGI Symbol;Acc:MGI:1096381]	Organismal Systems;Organismal Systems;Organismal Systems	Nervous system;Environmental adaptation;Environmental adaptation	ko04728//Dopaminergic synapse;ko04710//Circadian rhythm;ko04711//Circadian rhythm - fly	K02296;K02296;K02296	GO:0005634//nucleus;GO:0005654//nucleoplasm;GO:0005667//transcription factor complex;GO:0005737//cytoplasm;GO:0005829//cytosol;GO:0016604//nuclear body;GO:0016605//PML body;GO:0033391//chromatoid body;GO:0043231//intracellular membrane-bounded organelle	GO:0000976//transcription regulatory region sequence-specific DNA binding;GO:0000978//RNA polymerase II core promoter proximal region sequence-specific DNA binding;GO:0000981//RNA polymerase II transcription factor activity, sequence-specific DNA binding;GO:0001228//transcriptional activator activity, RNA polymerase II transcription regulatory region sequence-specific binding;GO:0003677//DNA bind…	GO:0006355//regulation of transcription, DNA-templated;GO:0006606//protein import into nucleus;GO:0007283//spermatogenesis;GO:0007623//circadian rhythm;GO:0032007//negative regulation of TOR signaling;GO:0032922//circadian regulation of gene expression;GO:0042176//regulation of protein catabolic process;GO:0042634//regulation of hair cycle;GO:0042753//positive regulation of circadian rhythm;GO:00…
ENSMUSG00000039096	72	49	57	94	115	98	0.70	0.55	0.61	1.13	1.49	1.17	0.62	1.26333333333333	1.02689522706306	0.00193757776605356	0.0227216731735868	Rsad1	radical S-adenosyl methionine domain containing 1 [Source:MGI Symbol;Acc:MGI:3039628]	-	-	-	-	GO:0005737//cytoplasm;GO:0005739//mitochondrion	GO:0003824//catalytic activity;GO:0004109//coproporphyrinogen oxidase activity;GO:0046872//metal ion binding;GO:0051536//iron-sulfur cluster binding;GO:0051539//4 iron, 4 sulfur cluster binding	GO:0006779//porphyrin-containing compound biosynthetic process;GO:0055114//oxidation-reduction process
ENSMUSG00000008999	52	31	42	66	70	126	0.57	0.40	0.51	0.89	0.89	1.45	0.493333333333333	1.07666666666667	1.12593698906498	0.00203028183745664	0.0235300239187035	Bmp7	bone morphogenetic protein 7 [Source:MGI Symbol;Acc:MGI:103302]	Environmental Information Processing;Organismal Systems;Environmental Information Processing;Environmental Information Processing	Signaling molecules and interaction;Development;Signal transduction;Signal transduction	ko04060//Cytokine-cytokine receptor interaction;ko04360//Axon guidance;ko04390//Hippo signaling pathway;ko04350//TGF-beta signaling pathway	K16621;K16621;K16621;K16621	GO:0005576//extracellular region;GO:0005615//extracellular space;GO:0031982//vesicle	GO:0005125//cytokine activity;GO:0005515//protein binding;GO:0008083//growth factor activity;GO:0008201//heparin binding;GO:0070700//BMP receptor binding	GO:0001503//ossification;GO:0001654//eye development;GO:0001656//metanephros development;GO:0001657//ureteric bud development;GO:0001707//mesoderm formation;GO:0001822//kidney development;GO:0001823//mesonephros development;GO:0003272//endocardial cushion formation;GO:0003344//pericardium morphogenesis;GO:0007275//multicellular organism development;GO:0007389//pattern specification process;GO:000…
ENSMUSG00000075033	45	27	49	75	89	74	0.28	0.19	0.34	0.58	0.65	0.49	0.27	0.573333333333333	1.08641475181747	0.00205724749059911	0.023755015627498	Nxpe3	neurexophilin and PC-esterase domain family, member 3 [Source:MGI Symbol;Acc:MGI:2686598]	-	-	-	-	GO:0005575//cellular_component;GO:0016020//membrane;GO:0016021//integral component of membrane	GO:0003674//molecular_function	GO:0008150//biological_process
ENSMUSG00000025488	19	47	26	41	117	117	2.13	6.11	3.21	5.66	15.17	13.77	3.81666666666667	11.5333333333333	1.59542443953978	0.00207886966938402	0.0239168860939302	Cox8b	cytochrome c oxidase subunit 8B [Source:MGI Symbol;Acc:MGI:105958]	Metabolism;Human Diseases;Human Diseases;Organismal Systems;Human Diseases;Human Diseases;Metabolism;Organismal Systems	Global and overview maps;Neurodegenerative diseases;Neurodegenerative diseases;Environmental adaptation;Endocrine and metabolic diseases;Neurodegenerative diseases;Energy metabolism;Circulatory system	ko01100//Metabolic pathways;ko05010//Alzheimer disease;ko05016//Huntington disease;ko04714//Thermogenesis;ko04932//Non-alcoholic fatty liver disease (NAFLD);ko05012//Parkinson disease;ko00190//Oxidative phosphorylation;ko04260//Cardiac muscle contraction	K02273;K02273;K02273;K02273;K02273;K02273;K02273;K02273	GO:0005739//mitochondrion;GO:0005743//mitochondrial inner membrane;GO:0016020//membrane;GO:0016021//integral component of membrane;GO:0045277//respiratory chain complex IV	GO:0004129//cytochrome-c oxidase activity	GO:0006119//oxidative phosphorylation;GO:0022900//electron transport chain;GO:1902600//hydrogen ion transmembrane transport
ENSMUSG00000068245	664	1983	1957	504	495	530	17.13	58.66	55.22	13.78	13.53	14.39	43.67	13.9	-1.65155764816939	0.00212533951857529	0.024273939439821	Phf11d	PHD finger protein 11D [Source:MGI Symbol;Acc:MGI:1277133]	Metabolism;Metabolism	Global and overview maps;Amino acid metabolism	ko01100//Metabolic pathways;ko00310//Lysine degradation	K18494;K18494	GO:0005634//nucleus;GO:0005654//nucleoplasm;GO:0031965//nuclear membrane	GO:0003674//molecular_function;GO:0046872//metal ion binding	GO:0008150//biological_process
ENSMUSG00000037217	54	54	55	20	25	30	0.67	0.79	0.76	0.31	0.36	0.40	0.74	0.356666666666667	-1.05294887994896	0.00216708445597741	0.0246255326872519	Syn1	synapsin I [Source:MGI Symbol;Acc:MGI:98460]	-	-	-	-	GO:0000795//synaptonemal complex;GO:0005794//Golgi apparatus;GO:0005829//cytosol;GO:0005856//cytoskeleton;GO:0008021//synaptic vesicle;GO:0014069//postsynaptic density;GO:0030054//cell junction;GO:0030424//axon;GO:0030425//dendrite;GO:0030672//synaptic vesicle membrane;GO:0043209//myelin sheath;GO:0043229//intracellular organelle;GO:0045202//synapse;GO:0048786//presynaptic active zone;GO:0098793/…	GO:0003779//actin binding;GO:0005524//ATP binding;GO:0019901//protein kinase binding;GO:0042802//identical protein binding;GO:0048306//calcium-dependent protein binding	GO:0007269//neurotransmitter secretion;GO:0048172//regulation of short-term neuronal synaptic plasticity;GO:0048666//neuron development;GO:0050808//synapse organization;GO:0097091//synaptic vesicle clustering;GO:0099504//synaptic vesicle cycle
ENSMUSG00000061615	124	140	139	32	75	87	10.58	13.86	13.09	3.38	7.43	7.79	12.51	6.2	-1.01274166889158	0.00227897390337772	0.0254736478880039	H2ac4	H2A clustered histone 4 [Source:MGI Symbol;Acc:MGI:2448306]	Human Diseases;Human Diseases;Cellular Processes	Immune diseases;Substance dependence;Cell growth and death	ko05322//Systemic lupus erythematosus;ko05034//Alcoholism;ko04217//Necroptosis	K11251;K11251;K11251	GO:0000786//nucleosome;GO:0000790//nuclear chromatin;GO:0005634//nucleus;GO:0005694//chromosome	GO:0003677//DNA binding;GO:0019899//enzyme binding;GO:0046982//protein heterodimerization activity	GO:0006325//chromatin organization;GO:0006342//chromatin silencing;GO:0008285//negative regulation of cell proliferation
ENSMUSG00000076543	499	1512	297	24	185	48	50.95	179.52	33.48	3.07	21.96	5.18	87.9833333333333	10.07	-3.12716657683005	0.00231706107781278	0.0257529466931177	Igkv4-74	immunoglobulin kappa variable 4-74 [Source:MGI Symbol;Acc:MGI:3779447]	-	-	-	-	GO:0005615//extracellular space	-	GO:0002377//immunoglobulin production;GO:0006955//immune response
ENSMUSG00000022026	232	33	46	26	12	31	3.76	0.61	0.73	1.02	0.27	0.48	1.7	0.59	-1.52674788677586	0.00260710149934478	0.028083483068627	Olfm4	olfactomedin 4 [Source:MGI Symbol;Acc:MGI:2685142]	-	-	-	-	GO:0005576//extracellular region;GO:0005615//extracellular space;GO:0005654//nucleoplasm;GO:0005739//mitochondrion;GO:0005829//cytosol;GO:0005886//plasma membrane;GO:0032991//macromolecular complex;GO:0042581//specific granule;GO:0045171//intercellular bridge;GO:0048471//perinuclear region of cytoplasm	GO:0005198//structural molecule activity;GO:0005515//protein binding;GO:0045296//cadherin binding	GO:0007155//cell adhesion;GO:0043124//negative regulation of I-kappaB kinase/NF-kappaB signaling;GO:0050777//negative regulation of immune response;GO:1900026//positive regulation of substrate adhesion-dependent cell spreading
ENSMUSG00000098814	278	223	412	62	206	137	30.84	28.74	50.47	8.48	26.49	15.99	36.6833333333333	16.9866666666667	-1.11072196252262	0.00278143393552072	0.0295564942594151	Igkv19-93	immunoglobulin kappa chain variable 19-93 [Source:MGI Symbol;Acc:MGI:107617]	-	-	-	-	GO:0005615//extracellular space	-	GO:0002377//immunoglobulin production;GO:0006955//immune response
ENSMUSG00000019876	105	158	131	72	54	82	2.78	3.81	2.92	1.65	1.08	1.92	3.17	1.55	-1.03221462486517	0.00286740239938763	0.0302655285470934	Pkib	protein kinase inhibitor beta, cAMP dependent, testis specific [Source:MGI Symbol;Acc:MGI:101937]	-	-	-	-	-	GO:0004860//protein kinase inhibitor activity;GO:0004862//cAMP-dependent protein kinase inhibitor activity	GO:0006469//negative regulation of protein kinase activity;GO:0032212//positive regulation of telomere maintenance via telomerase;GO:0051973//positive regulation of telomerase activity;GO:1904355//positive regulation of telomere capping;GO:2000480//negative regulation of cAMP-dependent protein kinase activity
ENSMUSG00000029915	137	98	117	28	65	76	3.74	2.80	3.80	0.70	1.76	2.28	3.44666666666667	1.58	-1.12527722141668	0.00298597947348059	0.0312029894879928	Clec5a	C-type lectin domain family 5, member a [Source:MGI Symbol;Acc:MGI:1345151]	-	-	-	-	GO:0005829//cytosol;GO:0005886//plasma membrane;GO:0009986//cell surface;GO:0016020//membrane;GO:0016021//integral component of membrane	GO:0001618//virus receptor activity;GO:0005515//protein binding;GO:0030246//carbohydrate binding	GO:0002076//osteoblast development;GO:0002376//immune system process;GO:0030099//myeloid cell differentiation;GO:0033033//negative regulation of myeloid cell apoptotic process;GO:0043066//negative regulation of apoptotic process;GO:0045087//innate immune response;GO:0046718//viral entry into host cell;GO:0050715//positive regulation of cytokine secretion
ENSMUSG00000041380	28	14	18	48	31	82	0.53	0.15	0.24	0.50	0.95	1.14	0.306666666666667	0.863333333333333	1.49324633162954	0.0030313866615189	0.0315935175783351	Htr2c	5-hydroxytryptamine (serotonin) receptor 2C [Source:MGI Symbol;Acc:MGI:96281]	Environmental Information Processing;Environmental Information Processing;Organismal Systems;Organismal Systems;Cellular Processes	Signaling molecules and interaction;Signal transduction;Nervous system;Sensory system;Cellular community - eukaryotes	ko04080//Neuroactive ligand-receptor interaction;ko04020//Calcium signaling pathway;ko04726//Serotonergic synapse;ko04750//Inflammatory mediator regulation of TRP channels;ko04540//Gap junction	K04157;K04157;K04157;K04157;K04157	GO:0005623//cell;GO:0005886//plasma membrane;GO:0005887//integral component of plasma membrane;GO:0009897//external side of plasma membrane;GO:0009986//cell surface;GO:0016020//membrane;GO:0016021//integral component of membrane;GO:0030425//dendrite;GO:0045202//synapse	GO:0001587//Gq/11-coupled serotonin receptor activity;GO:0004930//G-protein coupled receptor activity;GO:0004993//G-protein coupled serotonin receptor activity;GO:0008144//drug binding;GO:0030594//neurotransmitter receptor activity;GO:0042802//identical protein binding;GO:0051378//serotonin binding;GO:0071886//1-(4-iodo-2,5-dimethoxyphenyl)propan-2-amine binding	GO:0001662//behavioral fear response;GO:0006874//cellular calcium ion homeostasis;GO:0007165//signal transduction;GO:0007186//G-protein coupled receptor signaling pathway;GO:0007187//G-protein coupled receptor signaling pathway, coupled to cyclic nucleotide second messenger;GO:0007200//phospholipase C-activating G-protein coupled receptor signaling pathway;GO:0007208//phospholipase C-activating s…
ENSMUSG00000076522	509	6438	1511	473	79	171	54.22	796.93	177.74	62.16	9.76	19.17	342.963333333333	30.3633333333333	-3.49765225835849	0.00310643937934642	0.0321202972511381	Igkv16-104	immunoglobulin kappa variable 16-104 [Source:MGI Symbol;Acc:MGI:2685913]	-	-	-	-	GO:0005615//extracellular space	-	GO:0002377//immunoglobulin production;GO:0006955//immune response
ENSMUSG00000031138	22	25	23	3	8	8	0.32	0.43	0.37	0.05	0.14	0.12	0.373333333333333	0.103333333333333	-1.85315861167073	0.0031881263311654	0.0328354045908567	F9	coagulation factor IX [Source:MGI Symbol;Acc:MGI:88384]	Organismal Systems	Immune system	ko04610//Complement and coagulation cascades	K01321	GO:0005576//extracellular region;GO:0005615//extracellular space	GO:0004175//endopeptidase activity;GO:0004252//serine-type endopeptidase activity;GO:0005509//calcium ion binding;GO:0008233//peptidase activity;GO:0008236//serine-type peptidase activity;GO:0016787//hydrolase activity;GO:0046872//metal ion binding	GO:0006508//proteolysis;GO:0007596//blood coagulation;GO:0007599//hemostasis;GO:0031638//zymogen activation
ENSMUSG00000109564	249	220	102	351	454	1361	0.95	0.71	0.29	1.87	1.72	5.51	0.65	3.03333333333333	2.22239242133645	0.00320036404525134	0.0328753268057922	Muc16	mucin 16 [Source:MGI Symbol;Acc:MGI:1920982]	-	-	-	-	GO:0005615//extracellular space;GO:0009897//external side of plasma membrane;GO:0016020//membrane;GO:0016021//integral component of membrane	GO:0003674//molecular_function	GO:0045409//negative regulation of interleukin-6 biosynthetic process;GO:0050680//negative regulation of epithelial cell proliferation;GO:0061045//negative regulation of wound healing
ENSMUSG00000056656	6	23	24	2	3	3	0.09	0.40	0.40	0.04	0.05	0.05	0.296666666666667	0.0466666666666667	-2.66837850890879	0.00331563368703685	0.033904402468159	Apol8	apolipoprotein L 8 [Source:MGI Symbol;Acc:MGI:2444921]	-	-	-	-	GO:0005576//extracellular region;GO:0016020//membrane;GO:0016021//integral component of membrane	GO:0008289//lipid binding	GO:0006869//lipid transport;GO:0008150//biological_process;GO:0042157//lipoprotein metabolic process
ENSMUSG00000071516	104	195	85	60	58	52	10.69	23.26	9.62	7.55	6.94	5.61	14.5233333333333	6.7	-1.11613961184887	0.00334282477006546	0.0341602372701881	H2ac13	H2A clustered histone 13 [Source:MGI Symbol;Acc:MGI:2448457]	Human Diseases;Human Diseases;Cellular Processes	Immune diseases;Substance dependence;Cell growth and death	ko05322//Systemic lupus erythematosus;ko05034//Alcoholism;ko04217//Necroptosis	K11251;K11251;K11251	GO:0000786//nucleosome;GO:0000790//nuclear chromatin;GO:0005634//nucleus;GO:0005694//chromosome	GO:0003677//DNA binding;GO:0019899//enzyme binding;GO:0046982//protein heterodimerization activity	GO:0006325//chromatin organization;GO:0006342//chromatin silencing;GO:0008285//negative regulation of cell proliferation
ENSMUSG00000002688	35	66	24	87	107	94	0.38	0.84	0.30	1.19	1.37	1.09	0.506666666666667	1.21666666666667	1.2638251403238	0.00342299434914589	0.0348436453909498	Prkd1	protein kinase D1 [Source:MGI Symbol;Acc:MGI:99879]	Environmental Information Processing;Organismal Systems	Signal transduction;Endocrine system	ko04015//Rap1 signaling pathway;ko04925//Aldosterone synthesis and secretion	K06070;K06070	GO:0000421//autophagosome membrane;GO:0005634//nucleus;GO:0005737//cytoplasm;GO:0005794//Golgi apparatus;GO:0005802//trans-Golgi network;GO:0005829//cytosol;GO:0005886//plasma membrane;GO:0005911//cell-cell junction;GO:0005938//cell cortex;GO:0016020//membrane	GO:0000166//nucleotide binding;GO:0004672//protein kinase activity;GO:0004674//protein serine/threonine kinase activity;GO:0004697//protein kinase C activity;GO:0004698//calcium-dependent protein kinase C activity;GO:0005515//protein binding;GO:0005524//ATP binding;GO:0016301//kinase activity;GO:0016740//transferase activity;GO:0042802//identical protein binding;GO:0046872//metal ion binding	GO:0001525//angiogenesis;GO:0001938//positive regulation of endothelial cell proliferation;GO:0002376//immune system process;GO:0006468//protein phosphorylation;GO:0006915//apoptotic process;GO:0006954//inflammatory response;GO:0007030//Golgi organization;GO:0007265//Ras protein signal transduction;GO:0007399//nervous system development;GO:0010508//positive regulation of autophagy;GO:0010595//pos…
ENSMUSG00000022053	13	28	12	27	61	74	0.17	0.35	0.10	0.42	0.71	0.86	0.206666666666667	0.663333333333333	1.68242831015677	0.00346282810088541	0.0351354177694354	Ebf2	early B cell factor 2 [Source:MGI Symbol;Acc:MGI:894332]	-	-	-	-	GO:0005634//nucleus	GO:0000978//RNA polymerase II core promoter proximal region sequence-specific DNA binding;GO:0001228//transcriptional activator activity, RNA polymerase II transcription regulatory region sequence-specific binding;GO:0003677//DNA binding;GO:0003682//chromatin binding;GO:0003700//transcription factor activity, sequence-specific DNA binding;GO:0005515//protein binding;GO:0046872//metal ion binding;…	GO:0001709//cell fate determination;GO:0006355//regulation of transcription, DNA-templated;GO:0007275//multicellular organism development;GO:0035563//positive regulation of chromatin binding;GO:0045893//positive regulation of transcription, DNA-templated;GO:0045944//positive regulation of transcription from RNA polymerase II promoter;GO:0050873//brown fat cell differentiation;GO:0060612//adipose …
ENSMUSG00000076676	116	43	4	4	13	1	13.23	5.70	0.50	0.56	1.72	0.12	6.47666666666667	0.8	-3.01717958997683	0.00359584424256135	0.0360281000319897	Ighv12-3	immunoglobulin heavy variable V12-3 [Source:MGI Symbol;Acc:MGI:3646760]	Environmental Information Processing;Human Diseases;Human Diseases;Environmental Information Processing;Cellular Processes;Human Diseases;Human Diseases;Environmental Information Processing;Human Diseases;Human Diseases;Human Diseases;Environmental Information Processing;Organismal Systems;Human Diseases;Human Diseases;Organismal Systems;Organismal Systems;Human Diseases;Organismal Systems;Human …	Signal transduction;Infectious diseases;Infectious diseases;Signal transduction;Transport and catabolism;Cancers;Infectious diseases;Signal transduction;Immune diseases;Infectious diseases;Infectious diseases;Signal transduction;Immune system;Immune diseases;Cardiovascular diseases;Immune system;Immune system;Cardiovascular diseases;Immune system;Immune diseases;Infectious diseases;Immune system;…	ko04151//PI3K-Akt signaling pathway;ko05169//Epstein-Barr virus infection;ko05130//Pathogenic Escherichia coli infection;ko04020//Calcium signaling pathway;ko04145//Phagosome;ko05202//Transcriptional misregulation in cancers;ko05152//Tuberculosis;ko04072//Phospholipase D signaling pathway;ko05322//Systemic lupus erythematosus;ko05150//Staphylococcus aureus infection;ko05146//Amoebiasis;ko04064//N…	K06856;K06856;K06856;K06856;K06856;K06856;K06856;K06856;K06856;K06856;K06856;K06856;K06856;K06856;K06856;K06856;K06856;K06856;K06856;K06856;K06856;K06856;K06856;K06856;K06856;K06856;K06856	GO:0009897//external side of plasma membrane;GO:0042571//immunoglobulin complex, circulating	GO:0003823//antigen binding;GO:0034987//immunoglobulin receptor binding	GO:0006910//phagocytosis, recognition;GO:0006911//phagocytosis, engulfment;GO:0006958//complement activation, classical pathway;GO:0042742//defense response to bacterium;GO:0045087//innate immune response;GO:0050853//B cell receptor signaling pathway;GO:0050871//positive regulation of B cell activation
ENSMUSG00000030866	69	93	64	9	45	23	0.95	1.49	0.97	0.15	0.71	0.33	1.13666666666667	0.396666666666667	-1.51881016571623	0.00363752808981754	0.036346773351103	Ern2	endoplasmic reticulum (ER) to nucleus signalling 2 [Source:MGI Symbol;Acc:MGI:1349436]	-	-	-	-	GO:0005783//endoplasmic reticulum;GO:0005789//endoplasmic reticulum membrane;GO:0016020//membrane;GO:0016021//integral component of membrane;GO:1990604//IRE1-TRAF2-ASK1 complex	GO:0000166//nucleotide binding;GO:0000287//magnesium ion binding;GO:0003824//catalytic activity;GO:0004519//endonuclease activity;GO:0004521//endoribonuclease activity;GO:0004540//ribonuclease activity;GO:0004672//protein kinase activity;GO:0004674//protein serine/threonine kinase activity;GO:0005515//protein binding;GO:0005524//ATP binding;GO:0016301//kinase activity;GO:0016740//transferase acti…	GO:0006355//regulation of transcription, DNA-templated;GO:0006397//mRNA processing;GO:0006468//protein phosphorylation;GO:0006915//apoptotic process;GO:0006986//response to unfolded protein;GO:0007050//cell cycle arrest;GO:0007257//activation of JUN kinase activity;GO:0008152//metabolic process;GO:0016075//rRNA catabolic process;GO:0016310//phosphorylation;GO:0030263//apoptotic chromosome condens…
ENSMUSG00000026834	2	13	2	26	32	27	0.04	0.15	0.01	0.23	1.28	0.26	0.0666666666666667	0.59	3.14567745519563	0.00363768177367814	0.036346773351103	Acvr1c	activin A receptor, type IC [Source:MGI Symbol;Acc:MGI:2661081]	Environmental Information Processing;Cellular Processes;Environmental Information Processing	Signaling molecules and interaction;Cellular community - eukaryotes;Signal transduction	ko04060//Cytokine-cytokine receptor interaction;ko04550//Signaling pathways regulating pluripotency of stem cells;ko04350//TGF-beta signaling pathway	K13568;K13568;K13568	GO:0005737//cytoplasm;GO:0005886//plasma membrane;GO:0009986//cell surface;GO:0016020//membrane;GO:0016021//integral component of membrane;GO:0043235//receptor complex;GO:0048179//activin receptor complex	GO:0000166//nucleotide binding;GO:0004672//protein kinase activity;GO:0004674//protein serine/threonine kinase activity;GO:0004675//transmembrane receptor protein serine/threonine kinase activity;GO:0005524//ATP binding;GO:0016301//kinase activity;GO:0016361//activin receptor activity, type I;GO:0016740//transferase activity;GO:0019838//growth factor binding;GO:0038100//nodal binding;GO:0046332//…	GO:0001834//trophectodermal cell proliferation;GO:0002021//response to dietary excess;GO:0006468//protein phosphorylation;GO:0006915//apoptotic process;GO:0007178//transmembrane receptor protein serine/threonine kinase signaling pathway;GO:0007181//transforming growth factor beta receptor complex assembly;GO:0007399//nervous system development;GO:0009749//response to glucose;GO:0016310//phosphory…
ENSMUSG00000060275	46	28	48	60	79	92	0.78	0.68	1.58	1.39	2.49	2.58	1.01333333333333	2.15333333333333	1.08746284125034	0.00368165026764701	0.0365769512061178	Nrg2	neuregulin 2 [Source:MGI Symbol;Acc:MGI:1098246]	Environmental Information Processing;Human Diseases	Signal transduction;Drug resistance	ko04012//ErbB signaling pathway;ko01521//EGFR tyrosine kinase inhibitor resistance	K05456;K05456	GO:0016020//membrane;GO:0016021//integral component of membrane	GO:0005102//receptor binding	GO:0007399//nervous system development
ENSMUSG00000076514	1411	402	609	119	312	81	158.21	52.34	75.43	16.45	40.52	9.56	95.3266666666667	22.1766666666667	-2.10383731687817	0.00369363369264802	0.0366497016304577	Igkv17-121	immunoglobulin kappa variable 17-121 [Source:MGI Symbol;Acc:MGI:3647671]	-	-	-	-	GO:0005615//extracellular space	-	GO:0002377//immunoglobulin production;GO:0006955//immune response
ENSMUSG00000029596	8	7	7	12	33	34	0.22	0.35	0.23	0.60	1.18	1.13	0.266666666666667	0.97	1.86294724802092	0.00372992296811532	0.0369398605286837	Sdsl	serine dehydratase-like [Source:MGI Symbol;Acc:MGI:2182607]	Metabolism;Metabolism;Metabolism;Metabolism;Metabolism;Metabolism	Global and overview maps;Global and overview maps;Global and overview maps;Amino acid metabolism;Amino acid metabolism;Amino acid metabolism	ko01100//Metabolic pathways;ko01200//Carbon metabolism;ko01230//Biosynthesis of amino acids;ko00270//Cysteine and methionine metabolism;ko00260//Glycine, serine and threonine metabolism;ko00290//Valine, leucine and isoleucine biosynthesis	K17989;K17989;K17989;K17989;K17989;K17989	GO:0005739//mitochondrion	GO:0003941//L-serine ammonia-lyase activity;GO:0004794//L-threonine ammonia-lyase activity;GO:0016829//lyase activity;GO:0042802//identical protein binding	GO:0006565//L-serine catabolic process;GO:0006567//threonine catabolic process
ENSMUSG00000035818	21	46	24	7	12	5	0.48	1.10	0.47	0.22	0.32	0.09	0.683333333333333	0.21	-1.70220017600553	0.00378313866376525	0.0371975395633485	Plekhs1	pleckstrin homology domain containing, family S member 1 [Source:MGI Symbol;Acc:MGI:2443041]	-	-	-	-	GO:0005575//cellular_component	GO:0003674//molecular_function	GO:0008150//biological_process
ENSMUSG00000020884	7	6	13	25	24	31	0.39	0.24	0.49	1.13	1.04	1.11	0.373333333333333	1.09333333333333	1.55019708256048	0.00385531857660066	0.0376646495630101	Asgr1	asialoglycoprotein receptor 1 [Source:MGI Symbol;Acc:MGI:88081]	Organismal Systems	Endocrine system	ko04918//Thyroid hormone synthesis	K10063	GO:0016020//membrane;GO:0016021//integral component of membrane	GO:0004873//asialoglycoprotein receptor activity;GO:0030246//carbohydrate binding;GO:0046872//metal ion binding	GO:0006897//endocytosis;GO:0031668//cellular response to extracellular stimulus
ENSMUSG00000034656	189	286	180	96	147	123	1.44	2.71	1.99	0.61	1.01	1.28	2.04666666666667	0.966666666666667	-1.08218575535525	0.00388412229953621	0.037847330486249	Cacna1a	calcium channel, voltage-dependent, P/Q type, alpha 1A subunit [Source:MGI Symbol;Acc:MGI:109482]	Environmental Information Processing;Environmental Information Processing;Organismal Systems;Organismal Systems;Organismal Systems;Organismal Systems;Organismal Systems;Human Diseases;Human Diseases;Organismal Systems;Organismal Systems;Organismal Systems;Organismal Systems;Human Diseases;Human Diseases	Signal transduction;Signal transduction;Nervous system;Nervous system;Nervous system;Nervous system;Nervous system;Neurodegenerative disease;Substance dependence;Nervous system;Sensory system;Nervous system;Nervous system;Endocrine and metabolic diseases;Substance dependence	ko04020//Calcium signaling pathway;ko04010//MAPK signaling pathway;ko04723//Retrograde endocannabinoid signaling;ko04726//Serotonergic synapse;ko04728//Dopaminergic synapse;ko04724//Glutamatergic synapse;ko04725//Cholinergic synapse;ko05017//Spinocerebellar ataxia;ko05032//Morphine addiction;ko04727//GABAergic synapse;ko04742//Taste transduction;ko04721//Synaptic vesicle cycle;ko04730//Long-term …	K04344;K04344;K04344;K04344;K04344;K04344;K04344;K04344;K04344;K04344;K04344;K04344;K04344;K04344;K04344	GO:0005623//cell;GO:0005634//nucleus;GO:0005737//cytoplasm;GO:0005886//plasma membrane;GO:0005891//voltage-gated calcium channel complex;GO:0016020//membrane;GO:0016021//integral component of membrane;GO:0030425//dendrite;GO:0032991//macromolecular complex;GO:0042995//cell projection;GO:0043025//neuronal cell body;GO:0043204//perikaryon	GO:0005216//ion channel activity;GO:0005244//voltage-gated ion channel activity;GO:0005245//voltage-gated calcium channel activity;GO:0005262//calcium channel activity;GO:0005515//protein binding;GO:0005516//calmodulin binding;GO:0008331//high voltage-gated calcium channel activity;GO:0019905//syntaxin binding;GO:0046872//metal ion binding	GO:0001505//regulation of neurotransmitter levels;GO:0006811//ion transport;GO:0006816//calcium ion transport;GO:0007204//positive regulation of cytosolic calcium ion concentration;GO:0007214//gamma-aminobutyric acid signaling pathway;GO:0007268//synaptic transmission;GO:0007270//neuron-neuron synaptic transmission;GO:0007274//neuromuscular synaptic transmission;GO:0007416//synapse assembly;GO:00…
ENSMUSG00000028212	51	39	33	19	14	16	0.71	1.04	0.50	0.34	0.22	0.23	0.75	0.263333333333333	-1.51000044303994	0.00389465427423042	0.0379029874819442	Ccne2	cyclin E2 [Source:MGI Symbol;Acc:MGI:1329034]	Human Diseases;Environmental Information Processing;Human Diseases;Human Diseases;Human Diseases;Human Diseases;Cellular Processes;Human Diseases;Human Diseases;Human Diseases;Human Diseases;Human Diseases;Cellular Processes;Cellular Processes;Human Diseases;Human Diseases;Cellular Processes;Environmental Information Processing	Cancers;Signal transduction;Infectious diseases;Infectious diseases;Infectious diseases;Cancers;Cell growth and death;Infectious diseases;Cancers;Endocrine and metabolic diseases;Infectious diseases;Cancers;Cell growth and death;Cell growth and death;Cancers;Cancers;Cell growth and death;Signal transduction	ko05200//Pathways in cancer;ko04151//PI3K-Akt signaling pathway;ko05169//Epstein-Barr virus infection;ko05165//Human papillomavirus infection;ko05166//HTLV-I infection;ko05203//Viral carcinogenesis;ko04218//Cellular senescence;ko05161//Hepatitis B;ko05206//MicroRNAs in cancer;ko04934//Cushing syndrome;ko05162//Measles;ko05226//Gastric cancer;ko04110//Cell cycle;ko04114//Oocyte meiosis;ko05215//Pr…	K06626;K06626;K06626;K06626;K06626;K06626;K06626;K06626;K06626;K06626;K06626;K06626;K06626;K06626;K06626;K06626;K06626;K06626	GO:0000307//cyclin-dependent protein kinase holoenzyme complex;GO:0005634//nucleus;GO:0005737//cytoplasm;GO:0005813//centrosome;GO:0097134//cyclin E1-CDK2 complex;GO:0097135//cyclin E2-CDK2 complex	GO:0004672//protein kinase activity;GO:0016538//cyclin-dependent protein serine/threonine kinase regulator activity;GO:0019901//protein kinase binding	GO:0000079//regulation of cyclin-dependent protein serine/threonine kinase activity;GO:0000082//G1/S transition of mitotic cell cycle;GO:0000723//telomere maintenance;GO:0006270//DNA replication initiation;GO:0006468//protein phosphorylation;GO:0007049//cell cycle;GO:0007129//synapsis;GO:0044772//mitotic cell cycle phase transition;GO:0051301//cell division;GO:0051726//regulation of cell cycle;GO…
ENSMUSG00000022596	20	12	25	29	32	157	0.29	0.20	0.84	0.69	1.35	5.50	0.443333333333333	2.51333333333333	2.50313827776747	0.0039095227225729	0.0380006575141558	Slurp1	secreted Ly6/Plaur domain containing 1 [Source:MGI Symbol;Acc:MGI:1930923]	Environmental Information Processing	Signaling molecules and interaction	ko04080//Neuroactive ligand-receptor interaction	K23681	GO:0005576//extracellular region;GO:0005615//extracellular space	GO:0005125//cytokine activity;GO:0005515//protein binding;GO:0030549//acetylcholine receptor activator activity	GO:0007626//locomotory behavior;GO:0008285//negative regulation of cell proliferation;GO:0010839//negative regulation of keratinocyte proliferation;GO:0030336//negative regulation of cell migration;GO:0038195//urokinase plasminogen activator signaling pathway;GO:0050884//neuromuscular process controlling posture;GO:0099601//regulation of neurotransmitter receptor activity
ENSMUSG00000074264	43	39	53	61	169	80	1.35	1.05	1.46	2.16	5.13	2.04	1.28666666666667	3.11	1.27327623358367	0.00396391429777994	0.0383633724068832	Amy1	amylase 1, salivary [Source:MGI Symbol;Acc:MGI:88019]	Metabolism;Organismal Systems;Organismal Systems;Metabolism	Global and overview maps;Digestive system;Digestive system;Carbohydrate metabolism	ko01100//Metabolic pathways;ko04972//Pancreatic secretion;ko04973//Carbohydrate digestion and absorption;ko00500//Starch and sucrose metabolism	K01176;K01176;K01176;K01176	GO:0005576//extracellular region;GO:0005615//extracellular space	GO:0003824//catalytic activity;GO:0004556//alpha-amylase activity;GO:0005509//calcium ion binding;GO:0016160//amylase activity;GO:0016787//hydrolase activity;GO:0016798//hydrolase activity, acting on glycosyl bonds;GO:0031404//chloride ion binding;GO:0043169//cation binding;GO:0046872//metal ion binding	GO:0005975//carbohydrate metabolic process;GO:0008152//metabolic process;GO:0009617//response to bacterium;GO:0016052//carbohydrate catabolic process
ENSMUSG00000029075	54	45	50	20	26	24	2.27	2.15	2.16	0.95	1.18	0.99	2.19333333333333	1.04	-1.07654155487299	0.00403888505185572	0.0387888403362523	Tnfrsf4	tumor necrosis factor receptor superfamily, member 4 [Source:MGI Symbol;Acc:MGI:104512]	Environmental Information Processing	Signaling molecules and interaction	ko04060//Cytokine-cytokine receptor interaction	K05142	GO:0009986//cell surface;GO:0016020//membrane;GO:0016021//integral component of membrane	GO:0005515//protein binding	GO:0042098//T cell proliferation
ENSMUSG00000022227	61	39	19	5	10	18	2.42	1.80	0.83	0.24	0.46	0.75	1.68333333333333	0.483333333333333	-1.80023048762422	0.00403993898841364	0.0387888403362523	Mcpt1	mast cell protease 1 [Source:MGI Symbol;Acc:MGI:96937]	-	-	-	-	GO:0005576//extracellular region;GO:0005615//extracellular space;GO:0005737//cytoplasm	GO:0004252//serine-type endopeptidase activity;GO:0008233//peptidase activity;GO:0008236//serine-type peptidase activity;GO:0016787//hydrolase activity	GO:0006508//proteolysis;GO:0035690//cellular response to drug
ENSMUSG00000079597	134	15	21	12	8	12	13.03	1.70	2.26	1.44	0.90	1.23	5.66333333333333	1.19	-2.25068987315512	0.00406889384955785	0.0389716769622389	Cstdc4	cystatin domain containing 4 [Source:MGI Symbol;Acc:MGI:3645124]	-	-	-	-	GO:0001533//cornified envelope;GO:0005615//extracellular space;GO:0005654//nucleoplasm;GO:0005737//cytoplasm;GO:0005829//cytosol	GO:0002020//protease binding;GO:0004866//endopeptidase inhibitor activity;GO:0004869//cysteine-type endopeptidase inhibitor activity	GO:0010951//negative regulation of endopeptidase activity
ENSMUSG00000055170	42	21	27	3	5	15	1.40	0.81	0.99	0.12	0.19	0.53	1.06666666666667	0.28	-1.92961067210861	0.0041571821799623	0.0396482741930061	Ifng	interferon gamma [Source:MGI Symbol;Acc:MGI:107656]	Human Diseases;Human Diseases;Environmental Information Processing;Human Diseases;Human Diseases;Human Diseases;Organismal Systems;Human Diseases;Human Diseases;Human Diseases;Environmental Information Processing;Human Diseases;Cellular Processes;Human Diseases;Human Diseases;Human Diseases;Organismal Systems;Environmental Information Processing;Human Diseases;Human Diseases;Organismal Systems;Or…	Cancers;Infectious diseases;Signaling molecules and interaction;Infectious diseases;Immune diseases;Infectious diseases;Immune system;Immune diseases;Infectious diseases;Infectious diseases;Signal transduction;Immune diseases;Cell growth and death;Infectious diseases;Cardiovascular diseases;Infectious diseases;Development;Signal transduction;Infectious diseases;Infectious diseases;Immune system;I…	ko05200//Pathways in cancer;ko05168//Herpes simplex infection;ko04060//Cytokine-cytokine receptor interaction;ko05152//Tuberculosis;ko05322//Systemic lupus erythematosus;ko05146//Amoebiasis;ko04650//Natural killer cell mediated cytotoxicity;ko05323//Rheumatoid arthritis;ko05140//Leishmaniasis;ko05164//Influenza A;ko04630//Jak-STAT signaling pathway;ko05330//Allograft rejection;ko04217//Necroptosi…	K04687;K04687;K04687;K04687;K04687;K04687;K04687;K04687;K04687;K04687;K04687;K04687;K04687;K04687;K04687;K04687;K04687;K04687;K04687;K04687;K04687;K04687;K04687;K04687;K04687;K04687;K04687;K04687;K04687;K04687;K04687;K04687	GO:0005576//extracellular region;GO:0005615//extracellular space;GO:0005737//cytoplasm;GO:0009897//external side of plasma membrane;GO:0043005//neuron projection;GO:0043204//perikaryon	GO:0005125//cytokine activity;GO:0005133//interferon-gamma receptor binding;GO:0005515//protein binding	GO:0000122//negative regulation of transcription from RNA polymerase II promoter;GO:0001774//microglial cell activation;GO:0001781//neutrophil apoptotic process;GO:0001934//positive regulation of protein phosphorylation;GO:0002026//regulation of the force of heart contraction;GO:0002250//adaptive immune response;GO:0002302//CD8-positive, alpha-beta T cell differentiation involved in immune respon…
ENSMUSG00000024770	8	44	8	2	0	4	0.34	1.97	0.48	0.07	0.00	0.27	0.93	0.113333333333333	-3.03665847057885	0.00419923305273314	0.0399282576906494	Lipn	lipase, family member N [Source:MGI Symbol;Acc:MGI:1917416]	Cellular Processes;Organismal Systems;Metabolism	Transport and catabolism;Digestive system;Lipid metabolism	ko04142//Lysosome;ko04979//Cholesterol metabolism;ko00100//Steroid biosynthesis	K01052;K01052;K01052	GO:0005576//extracellular region;GO:0043231//intracellular membrane-bounded organelle	GO:0016787//hydrolase activity;GO:0016788//hydrolase activity, acting on ester bonds	GO:0006629//lipid metabolic process;GO:0016042//lipid catabolic process
ENSMUSG00000025279	303	473	368	69	290	109	2.57	4.66	3.45	0.72	3.03	0.97	3.56	1.57333333333333	-1.17805288232572	0.00423460355454591	0.0401560663413616	Dnase1l3	deoxyribonuclease 1-like 3 [Source:MGI Symbol;Acc:MGI:1314633]	-	-	-	-	GO:0005576//extracellular region;GO:0005634//nucleus;GO:0005783//endoplasmic reticulum	GO:0003677//DNA binding;GO:0004518//nuclease activity;GO:0004519//endonuclease activity;GO:0004520//endodeoxyribonuclease activity;GO:0004530//deoxyribonuclease I activity;GO:0004536//deoxyribonuclease activity;GO:0016787//hydrolase activity	GO:0000737//DNA catabolic process, endonucleolytic;GO:0002283//neutrophil activation involved in immune response;GO:0002673//regulation of acute inflammatory response;GO:0006308//DNA catabolic process;GO:0006309//apoptotic DNA fragmentation;GO:0006915//apoptotic process;GO:0010623//developmental programmed cell death;GO:0012501//programmed cell death;GO:0070948//regulation of neutrophil mediated …
ENSMUSG00000046806	26	34	48	78	63	76	0.44	0.90	1.21	2.35	1.46	1.72	0.85	1.84333333333333	1.11678223337585	0.00423824334083616	0.0401560663413616	Cyren	cell cycle regulator of NHEJ [Source:MGI Symbol;Acc:MGI:1925662]	-	-	-	-	GO:0005634//nucleus;GO:0005737//cytoplasm	GO:0003674//molecular_function	GO:0006281//DNA repair;GO:0006303//double-strand break repair via nonhomologous end joining;GO:0006974//cellular response to DNA damage stimulus;GO:2001033//negative regulation of double-strand break repair via nonhomologous end joining
ENSMUSG00000074218	82	84	62	70	190	241	8.33	9.89	6.92	8.77	22.51	25.90	8.38	19.06	1.18552597021059	0.00423870270955415	0.0401560663413616	Cox7a1	cytochrome c oxidase subunit 7A1 [Source:MGI Symbol;Acc:MGI:1316714]	Metabolism;Human Diseases;Human Diseases;Organismal Systems;Human Diseases;Human Diseases;Metabolism;Organismal Systems	Global and overview maps;Neurodegenerative diseases;Neurodegenerative diseases;Environmental adaptation;Endocrine and metabolic diseases;Neurodegenerative diseases;Energy metabolism;Circulatory system	ko01100//Metabolic pathways;ko05010//Alzheimer disease;ko05016//Huntington disease;ko04714//Thermogenesis;ko04932//Non-alcoholic fatty liver disease (NAFLD);ko05012//Parkinson disease;ko00190//Oxidative phosphorylation;ko04260//Cardiac muscle contraction	K02270;K02270;K02270;K02270;K02270;K02270;K02270;K02270	GO:0005739//mitochondrion;GO:0005743//mitochondrial inner membrane;GO:0005746//mitochondrial respiratory chain;GO:0016020//membrane;GO:0016021//integral component of membrane	GO:0004129//cytochrome-c oxidase activity;GO:0009055//electron carrier activity;GO:0016491//oxidoreductase activity	GO:0002082//regulation of oxidative phosphorylation;GO:0006119//oxidative phosphorylation;GO:0022900//electron transport chain;GO:0055114//oxidation-reduction process;GO:0097250//mitochondrial respiratory chain supercomplex assembly;GO:1902600//hydrogen ion transmembrane transport
ENSMUSG00000046997	45	49	18	13	10	12	0.67	1.20	0.30	0.54	0.33	0.19	0.723333333333333	0.353333333333333	-1.03363077788128	0.00425842427354253	0.0402719414010844	Spsb4	splA/ryanodine receptor domain and SOCS box containing 4 [Source:MGI Symbol;Acc:MGI:2183445]	-	-	-	-	GO:0005737//cytoplasm;GO:0005829//cytosol;GO:0019005//SCF ubiquitin ligase complex	GO:0005515//protein binding;GO:1990756//protein binding, bridging involved in substrate recognition for ubiquitination	GO:0006511//ubiquitin-dependent protein catabolic process;GO:0016567//protein ubiquitination;GO:0035556//intracellular signal transduction;GO:0042752//regulation of circadian rhythm;GO:0043161//proteasome-mediated ubiquitin-dependent protein catabolic process;GO:0048511//rhythmic process;GO:1902916//positive regulation of protein polyubiquitination
[truncated: 25 more rows]
