# Supplementary material for: A Combined Transcriptomic and Proteomic Approach to Reveal the Effect of Mogroside V on OVA-Induced Pulmonary Inflammation in Mice
Source: Frontiers journal article supplement (doi:10.3389/fimmu.2022.800143), 2022-03-18
Supplement: Data_Sheet_2.ZIP [file K-vs-C.filter.annot.xls]

id	K-1_count	K-2_count	K-3_count	C-1_count	C-2_count	C-3_count	K-1_fpkm	K-2_fpkm	K-3_fpkm	C-1_fpkm	C-2_fpkm	C-3_fpkm	K_mean	C_mean	log2(fc)	PValue	FDR	Symbol	Description	KEGG_A_class	KEGG_B_class	Pathway	K_ID	GO Component	GO Function	GO Process
ENSMUSG00000040809	4215	4412	4625	108403	83577	83617	115.54	119.77	132.11	2849.84	2541.01	2415.85	122.473333333333	2602.23333333333	4.40921076528018	0	0	Chil3	chitinase-like 3 [Source:MGI Symbol;Acc:MGI:1330860]	-	-	-	-	GO:0005576//extracellular region;GO:0005634//nucleus;GO:0005635//nuclear envelope;GO:0005737//cytoplasm;GO:0005783//endoplasmic reticulum;GO:0031410//cytoplasmic vesicle;GO:0048237//rough endoplasmic reticulum lumen	GO:0004563//beta-N-acetylhexosaminidase activity;GO:0008061//chitin binding;GO:0016787//hydrolase activity;GO:0016798//hydrolase activity, acting on glycosyl bonds;GO:0030246//carbohydrate binding	GO:0000272//polysaccharide catabolic process;GO:0005975//carbohydrate metabolic process;GO:0006032//chitin catabolic process;GO:0006954//inflammatory response;GO:0008152//metabolic process
ENSMUSG00000076614	106	106	37	176114	162515	165979	4.08	4.09	1.44	6586.02	7059.74	6854.07	3.20333333333333	6833.27666666667	11.058787894419	0	0	Ighg1	immunoglobulin heavy constant gamma 1 (G1m marker) [Source:MGI Symbol;Acc:MGI:96446]	Environmental Information Processing;Human Diseases;Human Diseases;Environmental Information Processing;Cellular Processes;Human Diseases;Human Diseases;Environmental Information Processing;Human Diseases;Human Diseases;Human Diseases;Environmental Information Processing;Organismal Systems;Human Diseases;Human Diseases;Organismal Systems;Organismal Systems;Human Diseases;Organismal Systems;Human …	Signal transduction;Infectious diseases;Infectious diseases;Signal transduction;Transport and catabolism;Cancers;Infectious diseases;Signal transduction;Immune diseases;Infectious diseases;Infectious diseases;Signal transduction;Immune system;Immune diseases;Cardiovascular diseases;Immune system;Immune system;Cardiovascular diseases;Immune system;Immune diseases;Infectious diseases;Immune system;…	ko04151//PI3K-Akt signaling pathway;ko05169//Epstein-Barr virus infection;ko05130//Pathogenic Escherichia coli infection;ko04020//Calcium signaling pathway;ko04145//Phagosome;ko05202//Transcriptional misregulation in cancers;ko05152//Tuberculosis;ko04072//Phospholipase D signaling pathway;ko05322//Systemic lupus erythematosus;ko05150//Staphylococcus aureus infection;ko05146//Amoebiasis;ko04064//N…	K06856;K06856;K06856;K06856;K06856;K06856;K06856;K06856;K06856;K06856;K06856;K06856;K06856;K06856;K06856;K06856;K06856;K06856;K06856;K06856;K06856;K06856;K06856;K06856;K06856;K06856;K06856	GO:0016020//membrane;GO:0016021//integral component of membrane	-	-
ENSMUSG00000076609	4147	3625	2587	241900	207656	191182	328.86	284.68	213.78	18308.51	18263.86	15979.03	275.773333333333	17517.1333333333	5.98913992979026	1.94928734640069e-289	1.04189408665117e-285	Igkc	immunoglobulin kappa constant [Source:MGI Symbol;Acc:MGI:96495]	-	-	-	-	-	-	-
ENSMUSG00000047730	358	280	355	6125	7127	5616	3.23	3.52	3.62	31.11	42.06	35.17	3.45666666666667	36.1133333333333	3.38507819665782	2.53073622686592e-152	1.01450888494487e-148	Fcgbp	Fc fragment of IgG binding protein [Source:MGI Symbol;Acc:MGI:2444336]	-	-	-	-	GO:0031012//extracellular matrix	GO:0005515//protein binding	GO:0008150//biological_process
ENSMUSG00000067149	1247	727	535	64122	63625	55837	37.77	21.80	16.88	1853.46	2137.15	1782.32	25.4833333333333	1924.31	6.2386434201574	6.24593337863144e-136	2.0030708345271e-132	Jchain	immunoglobulin joining chain [Source:MGI Symbol;Acc:MGI:96493]	-	-	-	-	GO:0005576//extracellular region;GO:0005615//extracellular space;GO:0071748//monomeric IgA immunoglobulin complex;GO:0071750//dimeric IgA immunoglobulin complex;GO:0071751//secretory IgA immunoglobulin complex;GO:0071752//secretory dimeric IgA immunoglobulin complex;GO:0071756//pentameric IgM immunoglobulin complex	GO:0003697//single-stranded DNA binding;GO:0003823//antigen binding;GO:0019862//IgA binding;GO:0030674//protein binding, bridging;GO:0031210//phosphatidylcholine binding;GO:0034987//immunoglobulin receptor binding;GO:0042803//protein homodimerization activity;GO:0042834//peptidoglycan binding	GO:0002250//adaptive immune response;GO:0003094//glomerular filtration;GO:0006959//humoral immune response;GO:0019731//antibacterial humoral response;GO:0045087//innate immune response;GO:0060267//positive regulation of respiratory burst;GO:0065003//macromolecular complex assembly
ENSMUSG00000094797	19	46	35	2965	3419	2329	2.31	5.54	4.43	344.05	461.00	298.44	4.09333333333333	367.83	6.48961918481395	3.27426638000647e-132	8.7504769005673e-129	Igkv6-15	immunoglobulin kappa variable 6-15 [Source:MGI Symbol;Acc:MGI:1330831]	-	-	-	-	GO:0005615//extracellular space	-	GO:0002377//immunoglobulin production;GO:0006955//immune response
ENSMUSG00000009185	54	20	24	2261	1951	2224	4.46	1.64	2.06	178.16	178.65	193.52	2.72	183.443333333333	6.0755840136585	2.77382214150212e-123	6.35403400556951e-120	Ccl8	chemokine (C-C motif) ligand 8 [Source:MGI Symbol;Acc:MGI:101878]	Environmental Information Processing;Organismal Systems;Environmental Information Processing	Signaling molecules and interaction;Immune system;Signaling molecules and interaction	ko04060//Cytokine-cytokine receptor interaction;ko04062//Chemokine signaling pathway;ko04061//Viral protein interaction with cytokine and cytokine receptor	K16596;K16596;K16596	GO:0005576//extracellular region;GO:0005615//extracellular space	GO:0005125//cytokine activity;GO:0008009//chemokine activity;GO:0008201//heparin binding;GO:0048020//CCR chemokine receptor binding	GO:0002548//monocyte chemotaxis;GO:0006935//chemotaxis;GO:0006954//inflammatory response;GO:0006955//immune response;GO:0007165//signal transduction;GO:0007186//G-protein coupled receptor signaling pathway;GO:0030593//neutrophil chemotaxis;GO:0043547//positive regulation of GTPase activity;GO:0045663//positive regulation of myoblast differentiation;GO:0048245//eosinophil chemotaxis;GO:0048247//ly…
ENSMUSG00000095571	24	21	41	2452	3199	1999	2.50	2.17	4.45	243.74	369.56	219.49	3.04	277.596666666667	6.51277511049055	6.43292288558876e-117	1.27364797897649e-113	Ighv5-17	immunoglobulin heavy variable 5-17 [Source:MGI Symbol;Acc:MGI:4439533]	Environmental Information Processing;Human Diseases;Human Diseases;Environmental Information Processing;Cellular Processes;Human Diseases;Human Diseases;Environmental Information Processing;Human Diseases;Human Diseases;Human Diseases;Environmental Information Processing;Organismal Systems;Human Diseases;Human Diseases;Organismal Systems;Organismal Systems;Human Diseases;Organismal Systems;Human …	Signal transduction;Infectious diseases;Infectious diseases;Signal transduction;Transport and catabolism;Cancers;Infectious diseases;Signal transduction;Immune diseases;Infectious diseases;Infectious diseases;Signal transduction;Immune system;Immune diseases;Cardiovascular diseases;Immune system;Immune system;Cardiovascular diseases;Immune system;Immune diseases;Infectious diseases;Immune system;…	ko04151//PI3K-Akt signaling pathway;ko05169//Epstein-Barr virus infection;ko05130//Pathogenic Escherichia coli infection;ko04020//Calcium signaling pathway;ko04145//Phagosome;ko05202//Transcriptional misregulation in cancers;ko05152//Tuberculosis;ko04072//Phospholipase D signaling pathway;ko05322//Systemic lupus erythematosus;ko05150//Staphylococcus aureus infection;ko05146//Amoebiasis;ko04064//N…	K06856;K06856;K06856;K06856;K06856;K06856;K06856;K06856;K06856;K06856;K06856;K06856;K06856;K06856;K06856;K06856;K06856;K06856;K06856;K06856;K06856;K06856;K06856;K06856;K06856;K06856;K06856	GO:0009897//external side of plasma membrane;GO:0042571//immunoglobulin complex, circulating	GO:0003823//antigen binding;GO:0034987//immunoglobulin receptor binding	GO:0006910//phagocytosis, recognition;GO:0006911//phagocytosis, engulfment;GO:0006958//complement activation, classical pathway;GO:0042742//defense response to bacterium;GO:0045087//innate immune response;GO:0050853//B cell receptor signaling pathway;GO:0050871//positive regulation of B cell activation
ENSMUSG00000028255	54	43	19	34477	52037	35932	0.62	0.49	0.43	379.81	666.17	437.13	0.513333333333333	494.37	9.91147953798706	7.14863224869874e-117	1.27364797897649e-113	Clca1	chloride channel accessory 1 [Source:MGI Symbol;Acc:MGI:1346342]	Organismal Systems;Organismal Systems	Digestive system;Endocrine system	ko04972//Pancreatic secretion;ko04924//Renin secretion	K05027;K05027	GO:0005576//extracellular region;GO:0005615//extracellular space;GO:0005887//integral component of plasma membrane;GO:0005902//microvillus;GO:0016021//integral component of membrane;GO:0030141//secretory granule;GO:0042589//zymogen granule membrane	GO:0005229//intracellular calcium activated chloride channel activity;GO:0005254//chloride channel activity;GO:0008233//peptidase activity;GO:0008237//metallopeptidase activity;GO:0016787//hydrolase activity;GO:0046872//metal ion binding	GO:0006508//proteolysis;GO:0006811//ion transport;GO:0006816//calcium ion transport;GO:0006821//chloride transport;GO:0071456//cellular response to hypoxia;GO:1902476//chloride transmembrane transport
ENSMUSG00000096833	28	14	7	2655	1788	1747	3.13	1.54	0.81	282.05	220.75	204.96	1.82666666666667	235.92	7.01294052482236	1.96548118233359e-115	3.15164907587191e-112	Igkv4-55	immunoglobulin kappa variable 4-55 [Source:MGI Symbol;Acc:MGI:2686370]	-	-	-	-	-	-	-
ENSMUSG00000095079	1655	1016	972	53507	54583	34171	62.57	37.49	37.69	1950.55	2313.20	1374.43	45.9166666666667	1879.39333333333	5.35510531305603	2.51224663916747e-111	3.66217044173186e-108	Igha	immunoglobulin heavy constant alpha [Source:MGI Symbol;Acc:MGI:96444]	Environmental Information Processing;Human Diseases;Human Diseases;Environmental Information Processing;Cellular Processes;Human Diseases;Human Diseases;Environmental Information Processing;Human Diseases;Human Diseases;Human Diseases;Environmental Information Processing;Organismal Systems;Human Diseases;Human Diseases;Organismal Systems;Organismal Systems;Human Diseases;Organismal Systems;Human …	Signal transduction;Infectious diseases;Infectious diseases;Signal transduction;Transport and catabolism;Cancers;Infectious diseases;Signal transduction;Immune diseases;Infectious diseases;Infectious diseases;Signal transduction;Immune system;Immune diseases;Cardiovascular diseases;Immune system;Immune system;Cardiovascular diseases;Immune system;Immune diseases;Infectious diseases;Immune system;…	ko04151//PI3K-Akt signaling pathway;ko05169//Epstein-Barr virus infection;ko05130//Pathogenic Escherichia coli infection;ko04020//Calcium signaling pathway;ko04145//Phagosome;ko05202//Transcriptional misregulation in cancers;ko05152//Tuberculosis;ko04072//Phospholipase D signaling pathway;ko05322//Systemic lupus erythematosus;ko05150//Staphylococcus aureus infection;ko05146//Amoebiasis;ko04064//N…	K06856;K06856;K06856;K06856;K06856;K06856;K06856;K06856;K06856;K06856;K06856;K06856;K06856;K06856;K06856;K06856;K06856;K06856;K06856;K06856;K06856;K06856;K06856;K06856;K06856;K06856;K06856	GO:0009897//external side of plasma membrane;GO:0042571//immunoglobulin complex, circulating	GO:0003823//antigen binding;GO:0034987//immunoglobulin receptor binding	GO:0002385//mucosal immune response;GO:0002455//humoral immune response mediated by circulating immunoglobulin;GO:0006910//phagocytosis, recognition;GO:0006911//phagocytosis, engulfment;GO:0006958//complement activation, classical pathway;GO:0016064//immunoglobulin mediated immune response;GO:0042742//defense response to bacterium;GO:0045087//innate immune response;GO:0050853//B cell receptor sig…
ENSMUSG00000076617	4137	4839	3469	41555	47492	38002	110.07	122.79	92.38	1108.07	1473.87	1119.01	108.413333333333	1233.65	3.50831904001773	4.49964495713237e-109	6.01265057396814e-106	Ighm	immunoglobulin heavy constant mu [Source:MGI Symbol;Acc:MGI:96448]	Environmental Information Processing;Human Diseases;Human Diseases;Environmental Information Processing;Cellular Processes;Human Diseases;Human Diseases;Environmental Information Processing;Human Diseases;Human Diseases;Human Diseases;Environmental Information Processing;Organismal Systems;Human Diseases;Human Diseases;Organismal Systems;Organismal Systems;Human Diseases;Organismal Systems;Human …	Signal transduction;Infectious diseases;Infectious diseases;Signal transduction;Transport and catabolism;Cancers;Infectious diseases;Signal transduction;Immune diseases;Infectious diseases;Infectious diseases;Signal transduction;Immune system;Immune diseases;Cardiovascular diseases;Immune system;Immune system;Cardiovascular diseases;Immune system;Immune diseases;Infectious diseases;Immune system;…	ko04151//PI3K-Akt signaling pathway;ko05169//Epstein-Barr virus infection;ko05130//Pathogenic Escherichia coli infection;ko04020//Calcium signaling pathway;ko04145//Phagosome;ko05202//Transcriptional misregulation in cancers;ko05152//Tuberculosis;ko04072//Phospholipase D signaling pathway;ko05322//Systemic lupus erythematosus;ko05150//Staphylococcus aureus infection;ko05146//Amoebiasis;ko04064//N…	K06856;K06856;K06856;K06856;K06856;K06856;K06856;K06856;K06856;K06856;K06856;K06856;K06856;K06856;K06856;K06856;K06856;K06856;K06856;K06856;K06856;K06856;K06856;K06856;K06856;K06856;K06856	GO:0005615//extracellular space;GO:0009986//cell surface;GO:0016020//membrane;GO:0016021//integral component of membrane;GO:0071756//pentameric IgM immunoglobulin complex;GO:0071757//hexameric IgM immunoglobulin complex	GO:0003697//single-stranded DNA binding;GO:0031210//phosphatidylcholine binding;GO:0034987//immunoglobulin receptor binding;GO:0042834//peptidoglycan binding	GO:0002250//adaptive immune response;GO:0019731//antibacterial humoral response;GO:0045087//innate immune response;GO:0050829//defense response to Gram-negative bacterium
ENSMUSG00000017002	359	168	244	9471	9269	7699	20.27	10.53	15.55	525.46	605.19	469.42	15.45	533.356666666667	5.10942187256393	1.82641007208326e-106	2.25280657737346e-103	Slpi	secretory leukocyte peptidase inhibitor [Source:MGI Symbol;Acc:MGI:109297]	-	-	-	-	GO:0005576//extracellular region;GO:0005615//extracellular space;GO:0005794//Golgi apparatus	GO:0003677//DNA binding;GO:0003729//mRNA binding;GO:0004866//endopeptidase inhibitor activity;GO:0004867//serine-type endopeptidase inhibitor activity;GO:0005515//protein binding;GO:0008233//peptidase activity;GO:0019899//enzyme binding;GO:0030414//peptidase inhibitor activity	GO:0002376//immune system process;GO:0006508//proteolysis;GO:0006955//immune response;GO:0010466//negative regulation of peptidase activity;GO:0010951//negative regulation of endopeptidase activity;GO:0019731//antibacterial humoral response;GO:0032091//negative regulation of protein binding;GO:0032496//response to lipopolysaccharide;GO:0035821//modification of morphology or physiology of other or…
ENSMUSG00000024353	145	125	97	2061	2168	1583	6.77	6.30	4.70	91.80	112.24	78.53	5.92333333333333	94.19	3.99109271872315	1.15424680070552e-96	1.32202481780807e-93	Mzb1	marginal zone B and B1 cell-specific protein 1 [Source:MGI Symbol;Acc:MGI:1917066]	-	-	-	-	GO:0005576//extracellular region;GO:0005737//cytoplasm;GO:0005783//endoplasmic reticulum;GO:0005788//endoplasmic reticulum lumen;GO:0034663//endoplasmic reticulum chaperone complex	GO:0003674//molecular_function;GO:0005515//protein binding	GO:0002642//positive regulation of immunoglobulin biosynthetic process;GO:0008284//positive regulation of cell proliferation;GO:0030888//regulation of B cell proliferation;GO:0033622//integrin activation;GO:0042127//regulation of cell proliferation;GO:0046626//regulation of insulin receptor signaling pathway
ENSMUSG00000094420	83	93	76	10109	4542	3905	9.75	10.81	9.27	1133.84	592.03	483.71	9.94333333333333	736.526666666667	6.21086437832387	6.10812732655024e-96	6.52958811208221e-93	Igkv10-96	immunoglobulin kappa variable 10-96 [Source:MGI Symbol;Acc:MGI:4439561]	-	-	-	-	GO:0005615//extracellular space	-	GO:0002377//immunoglobulin production;GO:0006955//immune response
ENSMUSG00000095794	46	33	13	1544	1471	1865	5.20	3.66	1.52	164.94	182.52	219.98	3.46	189.146666666667	5.77258950389693	1.68030151306847e-91	1.68397717262831e-88	Igkv6-17	immunoglobulin kappa variable 6-17 [Source:MGI Symbol;Acc:MGI:1330833]	-	-	-	-	-	-	-
ENSMUSG00000095642	27	19	9	1572	921	1032	2.85	1.99	0.99	158.63	107.97	115.01	1.94333333333333	127.203333333333	6.03245928367083	4.57605168612776e-86	4.31629345806228e-83	Ighv14-3	immunoglobulin heavy variable V14-3 [Source:MGI Symbol;Acc:MGI:4439764]	Environmental Information Processing;Human Diseases;Human Diseases;Environmental Information Processing;Cellular Processes;Human Diseases;Human Diseases;Environmental Information Processing;Human Diseases;Human Diseases;Human Diseases;Environmental Information Processing;Organismal Systems;Human Diseases;Human Diseases;Organismal Systems;Organismal Systems;Human Diseases;Organismal Systems;Human …	Signal transduction;Infectious diseases;Infectious diseases;Signal transduction;Transport and catabolism;Cancers;Infectious diseases;Signal transduction;Immune diseases;Infectious diseases;Infectious diseases;Signal transduction;Immune system;Immune diseases;Cardiovascular diseases;Immune system;Immune system;Cardiovascular diseases;Immune system;Immune diseases;Infectious diseases;Immune system;…	ko04151//PI3K-Akt signaling pathway;ko05169//Epstein-Barr virus infection;ko05130//Pathogenic Escherichia coli infection;ko04020//Calcium signaling pathway;ko04145//Phagosome;ko05202//Transcriptional misregulation in cancers;ko05152//Tuberculosis;ko04072//Phospholipase D signaling pathway;ko05322//Systemic lupus erythematosus;ko05150//Staphylococcus aureus infection;ko05146//Amoebiasis;ko04064//N…	K06856;K06856;K06856;K06856;K06856;K06856;K06856;K06856;K06856;K06856;K06856;K06856;K06856;K06856;K06856;K06856;K06856;K06856;K06856;K06856;K06856;K06856;K06856;K06856;K06856;K06856;K06856	GO:0009897//external side of plasma membrane;GO:0042571//immunoglobulin complex, circulating	GO:0003823//antigen binding;GO:0034987//immunoglobulin receptor binding	GO:0006910//phagocytosis, recognition;GO:0006911//phagocytosis, engulfment;GO:0006958//complement activation, classical pathway;GO:0042742//defense response to bacterium;GO:0045087//innate immune response;GO:0050853//B cell receptor signaling pathway;GO:0050871//positive regulation of B cell activation
ENSMUSG00000037974	29	15	30	609	604	496	0.12	0.06	0.14	2.28	2.63	2.05	0.106666666666667	2.32	4.44294349584872	2.7274644556544e-69	2.42971625257879e-66	Muc5ac	mucin 5, subtypes A and C, tracheobronchial/gastric [Source:MGI Symbol;Acc:MGI:104697]	Organismal Systems	Immune system	ko04657//IL-17 signaling pathway	K21125	GO:0005576//extracellular region;GO:0005615//extracellular space;GO:0005737//cytoplasm;GO:0070701//mucus layer	GO:0005515//protein binding	GO:0036438//maintenance of lens transparency;GO:0048015//phosphatidylinositol-mediated signaling
ENSMUSG00000026656	516	396	420	2301	2055	1958	13.97	11.05	11.88	56.53	57.28	52.86	12.3	55.5566666666667	2.17530172638018	1.8616332892174e-67	1.57112051540005e-64	Fcgr2b	Fc receptor, IgG, low affinity IIb [Source:MGI Symbol;Acc:MGI:95499]	Cellular Processes;Human Diseases;Human Diseases;Organismal Systems;Organismal Systems;Human Diseases;Organismal Systems	Transport and catabolism;Infectious diseases;Infectious diseases;Immune system;Immune system;Infectious diseases;Development	ko04145//Phagosome;ko05152//Tuberculosis;ko05150//Staphylococcus aureus infection;ko04666//Fc gamma R-mediated phagocytosis;ko04662//B cell receptor signaling pathway;ko05162//Measles;ko04380//Osteoclast differentiation	K12560;K12560;K12560;K12560;K12560;K12560;K12560	GO:0016020//membrane;GO:0016021//integral component of membrane	-	-
ENSMUSG00000022584	290	287	203	2247	3117	2959	18.36	16.57	12.92	117.28	191.97	169.72	15.95	159.656666666667	3.32334446662471	1.3069456957404e-66	1.04784371155986e-63	Ly6c2	lymphocyte antigen 6 complex, locus C2 [Source:MGI Symbol;Acc:MGI:3712069]	-	-	-	-	GO:0005886//plasma membrane;GO:0009986//cell surface;GO:0016020//membrane;GO:0031225//anchored component of membrane;GO:0045202//synapse	GO:0030550//acetylcholine receptor inhibitor activity;GO:0033130//acetylcholine receptor binding	GO:2000272//negative regulation of receptor activity
ENSMUSG00000096336	88	69	48	810	901	742	9.42	7.32	5.36	82.78	107.00	83.74	7.36666666666667	91.1733333333333	3.6295280531546	2.85153163407002e-60	2.17734808344347e-57	Igkv1-135	immunoglobulin kappa variable 1-135 [Source:MGI Symbol;Acc:MGI:3819952]	-	-	-	-	GO:0005615//extracellular space	-	GO:0002377//immunoglobulin production;GO:0006955//immune response
ENSMUSG00000094345	16	12	13	330	302	304	1.89	1.40	1.64	37.12	39.47	37.71	1.64333333333333	38.1	4.53509394672393	2.10633915500239e-57	1.53523401593015e-54	Igkv14-126	immunoglobulin kappa variable 14-126 [Source:MGI Symbol;Acc:MGI:3643131]	-	-	-	-	GO:0005615//extracellular space	-	GO:0002377//immunoglobulin production;GO:0006955//immune response
ENSMUSG00000061100	651	329	441	25252	41843	30238	45.93	22.99	32.42	1700.29	3274.02	2248.37	33.78	2407.56	6.15525861427273	2.72002475206793e-56	1.89633029997431e-53	Retnla	resistin like alpha [Source:MGI Symbol;Acc:MGI:1888504]	-	-	-	-	GO:0005576//extracellular region;GO:0005615//extracellular space	GO:0005179//hormone activity	GO:0007165//signal transduction
ENSMUSG00000038642	3767	4544	3851	14185	15284	12713	117.28	140.11	124.94	421.52	527.79	417.18	127.443333333333	455.496666666667	1.83758458963846	1.53978609533143e-47	1.02876958494331e-44	Ctss	cathepsin S [Source:MGI Symbol;Acc:MGI:107341]	Cellular Processes;Human Diseases;Cellular Processes;Cellular Processes;Organismal Systems	Transport and catabolism;Infectious diseases;Cell growth and death;Transport and catabolism;Immune system	ko04145//Phagosome;ko05152//Tuberculosis;ko04210//Apoptosis;ko04142//Lysosome;ko04612//Antigen processing and presentation	K01368;K01368;K01368;K01368;K01368	GO:0005576//extracellular region;GO:0005615//extracellular space;GO:0005764//lysosome;GO:0005770//late endosome;GO:0009986//cell surface;GO:0016020//membrane;GO:0031905//early endosome lumen;GO:0043231//intracellular membrane-bounded organelle	GO:0001968//fibronectin binding;GO:0004197//cysteine-type endopeptidase activity;GO:0005518//collagen binding;GO:0008233//peptidase activity;GO:0008234//cysteine-type peptidase activity;GO:0016787//hydrolase activity;GO:0043236//laminin binding;GO:0043394//proteoglycan binding	GO:0002250//adaptive immune response;GO:0006508//proteolysis;GO:0006955//immune response;GO:0010447//response to acidic pH;GO:0016485//protein processing;GO:0030574//collagen catabolic process;GO:0034769//basement membrane disassembly;GO:0045453//bone resorption;GO:0048002//antigen processing and presentation of peptide antigen;GO:0050729//positive regulation of inflammatory response;GO:0051603//…
ENSMUSG00000009092	24	19	13	370	344	273	0.77	0.61	0.43	11.39	12.71	9.28	0.603333333333333	11.1266666666667	4.2049223522794	3.25036499823379e-47	2.08478410986715e-44	Derl3	Der1-like domain family, member 3 [Source:MGI Symbol;Acc:MGI:1917627]	Genetic Information Processing	Folding, sorting and degradation	ko04141//Protein processing in endoplasmic reticulum	K13989	GO:0000839//Hrd1p ubiquitin ligase ERAD-L complex;GO:0005783//endoplasmic reticulum;GO:0005785//signal recognition particle receptor complex;GO:0005789//endoplasmic reticulum membrane;GO:0016020//membrane;GO:0016021//integral component of membrane;GO:0030176//integral component of endoplasmic reticulum membrane;GO:0048500//signal recognition particle	GO:0051787//misfolded protein binding;GO:1990381//ubiquitin-specific protease binding	GO:0018279//protein N-linked glycosylation via asparagine;GO:0030433//ER-associated ubiquitin-dependent protein catabolic process;GO:0030968//endoplasmic reticulum unfolded protein response;GO:1904153//negative regulation of retrograde protein transport, ER to cytosol
ENSMUSG00000018927	2690	2602	2705	8586	6366	6957	78.81	75.49	82.58	240.08	206.85	214.82	78.96	220.583333333333	1.48212989409257	3.46521477876671e-47	2.13710457605863e-44	Ccl6	chemokine (C-C motif) ligand 6 [Source:MGI Symbol;Acc:MGI:98263]	Environmental Information Processing;Organismal Systems;Environmental Information Processing	Signaling molecules and interaction;Immune system;Signaling molecules and interaction	ko04060//Cytokine-cytokine receptor interaction;ko04062//Chemokine signaling pathway;ko04061//Viral protein interaction with cytokine and cytokine receptor	K05510;K05510;K05510	GO:0005576//extracellular region;GO:0005615//extracellular space	GO:0005125//cytokine activity;GO:0008009//chemokine activity;GO:0048020//CCR chemokine receptor binding	GO:0002548//monocyte chemotaxis;GO:0006935//chemotaxis;GO:0006954//inflammatory response;GO:0006955//immune response;GO:0007186//G-protein coupled receptor signaling pathway;GO:0030593//neutrophil chemotaxis;GO:0043547//positive regulation of GTPase activity;GO:0048245//eosinophil chemotaxis;GO:0048247//lymphocyte chemotaxis;GO:0060326//cell chemotaxis;GO:0070098//chemokine-mediated signaling pat…
ENSMUSG00000024672	38	44	36	340	420	400	1.26	1.48	1.30	11.58	16.35	14.12	1.34666666666667	14.0166666666667	3.37967860239071	3.65826509305006e-46	2.17260299137251e-43	Ms4a7	membrane-spanning 4-domains, subfamily A, member 7 [Source:MGI Symbol;Acc:MGI:1918846]	-	-	-	-	GO:0005575//cellular_component;GO:0016020//membrane;GO:0016021//integral component of membrane	GO:0003674//molecular_function	GO:0008150//biological_process
ENSMUSG00000076514	9	8	6	1411	402	609	1.02	0.93	0.73	158.21	52.34	75.43	0.893333333333333	95.3266666666667	6.73753744480254	1.40753712688082e-43	8.06066351054784e-41	Igkv17-121	immunoglobulin kappa variable 17-121 [Source:MGI Symbol;Acc:MGI:3647671]	-	-	-	-	GO:0005615//extracellular space	-	GO:0002377//immunoglobulin production;GO:0006955//immune response
ENSMUSG00000105906	48	60	31	528	580	838	4.42	5.56	3.00	46.84	59.73	82.09	4.32666666666667	62.8866666666667	3.86142628436226	2.42403194343414e-42	1.34032249010229e-39	Iglc1	immunoglobulin lambda constant 1 [Source:MGI Symbol;Acc:MGI:99546]	Human Diseases	Immune diseases	ko05340//Primary immunodeficiency	K06554	GO:0009897//external side of plasma membrane;GO:0019815//B cell receptor complex;GO:0042571//immunoglobulin complex, circulating	GO:0003823//antigen binding;GO:0005515//protein binding;GO:0034987//immunoglobulin receptor binding	GO:0006910//phagocytosis, recognition;GO:0006911//phagocytosis, engulfment;GO:0006958//complement activation, classical pathway;GO:0042742//defense response to bacterium;GO:0045087//innate immune response;GO:0050853//B cell receptor signaling pathway;GO:0050871//positive regulation of B cell activation
ENSMUSG00000096108	16	11	12	514	313	252	1.46	1.00	1.14	44.89	31.77	24.31	1.2	33.6566666666667	4.8097859892627	2.56426743001412e-39	1.37060094134255e-36	Ighv11-2	immunoglobulin heavy variable V11-2 [Source:MGI Symbol;Acc:MGI:4947968]	Environmental Information Processing;Human Diseases;Human Diseases;Environmental Information Processing;Cellular Processes;Human Diseases;Human Diseases;Environmental Information Processing;Human Diseases;Human Diseases;Human Diseases;Environmental Information Processing;Organismal Systems;Human Diseases;Human Diseases;Organismal Systems;Organismal Systems;Human Diseases;Organismal Systems;Human …	Signal transduction;Infectious diseases;Infectious diseases;Signal transduction;Transport and catabolism;Cancers;Infectious diseases;Signal transduction;Immune diseases;Infectious diseases;Infectious diseases;Signal transduction;Immune system;Immune diseases;Cardiovascular diseases;Immune system;Immune system;Cardiovascular diseases;Immune system;Immune diseases;Infectious diseases;Immune system;…	ko04151//PI3K-Akt signaling pathway;ko05169//Epstein-Barr virus infection;ko05130//Pathogenic Escherichia coli infection;ko04020//Calcium signaling pathway;ko04145//Phagosome;ko05202//Transcriptional misregulation in cancers;ko05152//Tuberculosis;ko04072//Phospholipase D signaling pathway;ko05322//Systemic lupus erythematosus;ko05150//Staphylococcus aureus infection;ko05146//Amoebiasis;ko04064//N…	K06856;K06856;K06856;K06856;K06856;K06856;K06856;K06856;K06856;K06856;K06856;K06856;K06856;K06856;K06856;K06856;K06856;K06856;K06856;K06856;K06856;K06856;K06856;K06856;K06856;K06856;K06856	GO:0009897//external side of plasma membrane;GO:0042571//immunoglobulin complex, circulating	GO:0003823//antigen binding;GO:0034987//immunoglobulin receptor binding	GO:0006910//phagocytosis, recognition;GO:0006911//phagocytosis, engulfment;GO:0006958//complement activation, classical pathway;GO:0042742//defense response to bacterium;GO:0045087//innate immune response;GO:0050853//B cell receptor signaling pathway;GO:0050871//positive regulation of B cell activation
ENSMUSG00000046805	5804	6553	5454	13261	12111	12508	56.50	63.17	55.32	123.20	130.76	128.32	58.33	127.426666666667	1.1273572437142	1.68210502487573e-38	8.70082389480076e-36	Mpeg1	macrophage expressed gene 1 [Source:MGI Symbol;Acc:MGI:1333743]	-	-	-	-	GO:0016020//membrane;GO:0016021//integral component of membrane	-	-
ENSMUSG00000040552	180	138	138	1064	1491	938	1.76	1.34	1.41	9.95	16.21	9.69	1.50333333333333	11.95	2.99077378033389	1.33374693063407e-37	6.68332251022414e-35	C3ar1	complement component 3a receptor 1 [Source:MGI Symbol;Acc:MGI:1097680]	Environmental Information Processing;Human Diseases;Organismal Systems	Signaling molecules and interaction;Infectious diseases;Immune system	ko04080//Neuroactive ligand-receptor interaction;ko05150//Staphylococcus aureus infection;ko04610//Complement and coagulation cascades	K04009;K04009;K04009	GO:0005623//cell;GO:0005886//plasma membrane;GO:0016020//membrane;GO:0016021//integral component of membrane	GO:0001850//complement component C3a binding;GO:0004875//complement receptor activity;GO:0004876//complement component C3a receptor activity;GO:0004930//G-protein coupled receptor activity	GO:0002430//complement receptor mediated signaling pathway;GO:0002462//tolerance induction to nonself antigen;GO:0006935//chemotaxis;GO:0006954//inflammatory response;GO:0007165//signal transduction;GO:0007186//G-protein coupled receptor signaling pathway;GO:0007200//phospholipase C-activating G-protein coupled receptor signaling pathway;GO:0007204//positive regulation of cytosolic calcium ion co…
ENSMUSG00000094164	1	6	1	325	449	443	0.12	0.72	0.13	37.75	60.54	56.77	0.323333333333333	51.6866666666667	7.32062610739666	2.32128528007238e-37	1.12793362018062e-34	Ighv2-3	immunoglobulin heavy variable 2-3 [Source:MGI Symbol;Acc:MGI:4439872]	Environmental Information Processing;Human Diseases;Human Diseases;Environmental Information Processing;Cellular Processes;Human Diseases;Human Diseases;Environmental Information Processing;Human Diseases;Human Diseases;Human Diseases;Environmental Information Processing;Organismal Systems;Human Diseases;Human Diseases;Organismal Systems;Organismal Systems;Human Diseases;Organismal Systems;Human …	Signal transduction;Infectious diseases;Infectious diseases;Signal transduction;Transport and catabolism;Cancers;Infectious diseases;Signal transduction;Immune diseases;Infectious diseases;Infectious diseases;Signal transduction;Immune system;Immune diseases;Cardiovascular diseases;Immune system;Immune system;Cardiovascular diseases;Immune system;Immune diseases;Infectious diseases;Immune system;…	ko04151//PI3K-Akt signaling pathway;ko05169//Epstein-Barr virus infection;ko05130//Pathogenic Escherichia coli infection;ko04020//Calcium signaling pathway;ko04145//Phagosome;ko05202//Transcriptional misregulation in cancers;ko05152//Tuberculosis;ko04072//Phospholipase D signaling pathway;ko05322//Systemic lupus erythematosus;ko05150//Staphylococcus aureus infection;ko05146//Amoebiasis;ko04064//N…	K06856;K06856;K06856;K06856;K06856;K06856;K06856;K06856;K06856;K06856;K06856;K06856;K06856;K06856;K06856;K06856;K06856;K06856;K06856;K06856;K06856;K06856;K06856;K06856;K06856;K06856;K06856	GO:0009897//external side of plasma membrane;GO:0042571//immunoglobulin complex, circulating	GO:0003823//antigen binding;GO:0034987//immunoglobulin receptor binding	GO:0006910//phagocytosis, recognition;GO:0006911//phagocytosis, engulfment;GO:0006958//complement activation, classical pathway;GO:0042742//defense response to bacterium;GO:0045087//innate immune response;GO:0050853//B cell receptor signaling pathway;GO:0050871//positive regulation of B cell activation
ENSMUSG00000076556	21	7	8	542	576	284	2.52	0.83	1.00	62.01	76.58	35.92	1.45	58.17	5.32615049881302	8.11593354142709e-36	3.82761748049363e-33	Igkv4-57	immunoglobulin kappa variable 4-57 [Source:MGI Symbol;Acc:MGI:2685035]	-	-	-	-	GO:0005615//extracellular space	-	GO:0002377//immunoglobulin production;GO:0006955//immune response
ENSMUSG00000096459	14	17	15	689	402	250	1.68	2.02	1.89	79.02	53.57	31.69	1.86333333333333	54.76	4.87716475913587	7.24304058463217e-35	3.31834730784505e-32	Ighv9-3	immunoglobulin heavy variable V9-3 [Source:MGI Symbol;Acc:MGI:3642720]	Environmental Information Processing;Human Diseases;Human Diseases;Environmental Information Processing;Cellular Processes;Human Diseases;Human Diseases;Environmental Information Processing;Human Diseases;Human Diseases;Human Diseases;Environmental Information Processing;Organismal Systems;Human Diseases;Human Diseases;Organismal Systems;Organismal Systems;Human Diseases;Organismal Systems;Human …	Signal transduction;Infectious diseases;Infectious diseases;Signal transduction;Transport and catabolism;Cancers;Infectious diseases;Signal transduction;Immune diseases;Infectious diseases;Infectious diseases;Signal transduction;Immune system;Immune diseases;Cardiovascular diseases;Immune system;Immune system;Cardiovascular diseases;Immune system;Immune diseases;Infectious diseases;Immune system;…	ko04151//PI3K-Akt signaling pathway;ko05169//Epstein-Barr virus infection;ko05130//Pathogenic Escherichia coli infection;ko04020//Calcium signaling pathway;ko04145//Phagosome;ko05202//Transcriptional misregulation in cancers;ko05152//Tuberculosis;ko04072//Phospholipase D signaling pathway;ko05322//Systemic lupus erythematosus;ko05150//Staphylococcus aureus infection;ko05146//Amoebiasis;ko04064//N…	K06856;K06856;K06856;K06856;K06856;K06856;K06856;K06856;K06856;K06856;K06856;K06856;K06856;K06856;K06856;K06856;K06856;K06856;K06856;K06856;K06856;K06856;K06856;K06856;K06856;K06856;K06856	GO:0009897//external side of plasma membrane;GO:0042571//immunoglobulin complex, circulating	GO:0003823//antigen binding;GO:0034987//immunoglobulin receptor binding	GO:0006910//phagocytosis, recognition;GO:0006911//phagocytosis, engulfment;GO:0006958//complement activation, classical pathway;GO:0042742//defense response to bacterium;GO:0045087//innate immune response;GO:0050853//B cell receptor signaling pathway;GO:0050871//positive regulation of B cell activation
ENSMUSG00000094117	27	22	15	524	390	1132	3.17	2.56	1.84	58.78	50.84	140.18	2.52333333333333	83.2666666666667	5.04433636650959	3.40128396475324e-34	1.51498856596717e-31	Igkv3-12	immunoglobulin kappa variable 3-12 [Source:MGI Symbol;Acc:MGI:1330815]	-	-	-	-	GO:0005615//extracellular space	-	GO:0002377//immunoglobulin production;GO:0006955//immune response
ENSMUSG00000038209	13	9	3	273	339	214	0.48	0.33	0.12	9.63	13.90	8.34	0.31	10.6233333333333	5.09882449266982	6.63231889019121e-34	2.87430360551935e-31	Itln1	intelectin 1 (galactofuranose binding) [Source:MGI Symbol;Acc:MGI:1333831]	-	-	-	-	GO:0005576//extracellular region;GO:0005886//plasma membrane;GO:0016020//membrane;GO:0031225//anchored component of membrane;GO:0031526//brush border membrane;GO:0043235//receptor complex;GO:0045121//membrane raft	GO:0005509//calcium ion binding;GO:0030246//carbohydrate binding;GO:0042802//identical protein binding;GO:0046872//metal ion binding;GO:0070492//oligosaccharide binding	GO:0001934//positive regulation of protein phosphorylation;GO:0009624//response to nematode;GO:0046326//positive regulation of glucose import;GO:0070207//protein homotrimerization
ENSMUSG00000036905	667	399	518	2404	2631	2691	25.86	15.32	20.93	88.97	113.15	109.98	20.7033333333333	104.033333333333	2.32911088435986	9.90854290612866e-34	4.18114435525719e-31	C1qb	complement component 1, q subcomponent, beta polypeptide [Source:MGI Symbol;Acc:MGI:88224]	Human Diseases;Human Diseases;Human Diseases;Organismal Systems;Human Diseases;Human Diseases	Immune diseases;Infectious diseases;Infectious diseases;Immune system;Infectious diseases;Neurodegenerative diseases	ko05322//Systemic lupus erythematosus;ko05150//Staphylococcus aureus infection;ko05142//Chagas disease (American trypanosomiasis);ko04610//Complement and coagulation cascades;ko05133//Pertussis;ko05020//Prion diseases	K03987;K03987;K03987;K03987;K03987;K03987	GO:0005576//extracellular region;GO:0005581//collagen trimer;GO:0005602//complement component C1 complex;GO:0005615//extracellular space;GO:0005623//cell;GO:0045202//synapse;GO:0098794//postsynapse	GO:0005515//protein binding	GO:0002376//immune system process;GO:0006958//complement activation, classical pathway;GO:0045087//innate immune response;GO:0048839//inner ear development
ENSMUSG00000076532	9	10	7	535	461	194	1.06	1.17	0.86	60.17	60.25	24.10	1.03	48.1733333333333	5.54751851152807	1.85637904741749e-33	7.63257385265114e-31	Igkv4-91	immunoglobulin kappa chain variable 4-91 [Source:MGI Symbol;Acc:MGI:3642277]	-	-	-	-	GO:0005615//extracellular space	-	GO:0002377//immunoglobulin production;GO:0006955//immune response
ENSMUSG00000095200	9	5	4	822	313	270	0.98	0.54	0.45	85.30	37.80	30.98	0.656666666666667	51.36	6.28934016838708	8.765384427344e-33	3.51382348231152e-30	Ighv1-7	immunoglobulin heavy variable V1-7 [Source:MGI Symbol;Acc:MGI:3704122]	Environmental Information Processing;Human Diseases;Human Diseases;Environmental Information Processing;Cellular Processes;Human Diseases;Human Diseases;Environmental Information Processing;Human Diseases;Human Diseases;Human Diseases;Environmental Information Processing;Organismal Systems;Human Diseases;Human Diseases;Organismal Systems;Organismal Systems;Human Diseases;Organismal Systems;Human …	Signal transduction;Infectious diseases;Infectious diseases;Signal transduction;Transport and catabolism;Cancers;Infectious diseases;Signal transduction;Immune diseases;Infectious diseases;Infectious diseases;Signal transduction;Immune system;Immune diseases;Cardiovascular diseases;Immune system;Immune system;Cardiovascular diseases;Immune system;Immune diseases;Infectious diseases;Immune system;…	ko04151//PI3K-Akt signaling pathway;ko05169//Epstein-Barr virus infection;ko05130//Pathogenic Escherichia coli infection;ko04020//Calcium signaling pathway;ko04145//Phagosome;ko05202//Transcriptional misregulation in cancers;ko05152//Tuberculosis;ko04072//Phospholipase D signaling pathway;ko05322//Systemic lupus erythematosus;ko05150//Staphylococcus aureus infection;ko05146//Amoebiasis;ko04064//N…	K06856;K06856;K06856;K06856;K06856;K06856;K06856;K06856;K06856;K06856;K06856;K06856;K06856;K06856;K06856;K06856;K06856;K06856;K06856;K06856;K06856;K06856;K06856;K06856;K06856;K06856;K06856	GO:0009897//external side of plasma membrane;GO:0042571//immunoglobulin complex, circulating	GO:0003823//antigen binding;GO:0034987//immunoglobulin receptor binding	GO:0006910//phagocytosis, recognition;GO:0006911//phagocytosis, engulfment;GO:0006958//complement activation, classical pathway;GO:0042742//defense response to bacterium;GO:0045087//innate immune response;GO:0050853//B cell receptor signaling pathway;GO:0050871//positive regulation of B cell activation
ENSMUSG00000076940	41	38	45	543	698	337	4.69	4.34	5.36	59.70	89.29	40.92	4.79666666666667	63.3033333333333	3.72217737759917	1.04480156963303e-32	4.08619345586966e-30	Iglv2	immunoglobulin lambda variable 2 [Source:MGI Symbol;Acc:MGI:99548]	-	-	-	-	GO:0005615//extracellular space;GO:0019814//immunoglobulin complex	-	GO:0002250//adaptive immune response;GO:0002376//immune system process;GO:0002377//immunoglobulin production;GO:0006955//immune response
ENSMUSG00000019122	634	531	464	2814	3765	2356	18.00	16.54	16.01	77.17	117.00	79.40	16.85	91.19	2.43612703406383	1.32193213023607e-32	5.04694802579413e-30	Ccl9	chemokine (C-C motif) ligand 9 [Source:MGI Symbol;Acc:MGI:104533]	Environmental Information Processing;Organismal Systems;Environmental Information Processing	Signaling molecules and interaction;Immune system;Signaling molecules and interaction	ko04060//Cytokine-cytokine receptor interaction;ko04062//Chemokine signaling pathway;ko04061//Viral protein interaction with cytokine and cytokine receptor	K22671;K22671;K22671	GO:0005576//extracellular region;GO:0005615//extracellular space	GO:0005125//cytokine activity;GO:0008009//chemokine activity;GO:0048020//CCR chemokine receptor binding	GO:0002548//monocyte chemotaxis;GO:0006935//chemotaxis;GO:0006954//inflammatory response;GO:0006955//immune response;GO:0007165//signal transduction;GO:0007186//G-protein coupled receptor signaling pathway;GO:0030593//neutrophil chemotaxis;GO:0043547//positive regulation of GTPase activity;GO:0045662//negative regulation of myoblast differentiation;GO:0048245//eosinophil chemotaxis;GO:0048247//ly…
ENSMUSG00000041920	59	46	43	447	315	294	0.77	0.99	0.80	7.50	6.03	5.30	0.853333333333333	6.27666666666667	2.87881728461423	1.74576170067528e-32	6.51006717914608e-30	Slc16a6	solute carrier family 16 (monocarboxylic acid transporters), member 6 [Source:MGI Symbol;Acc:MGI:2144585]	-	-	-	-	GO:0005886//plasma membrane;GO:0016020//membrane;GO:0016021//integral component of membrane	GO:0008028//monocarboxylic acid transmembrane transporter activity;GO:0015293//symporter activity	GO:0015718//monocarboxylic acid transport;GO:0055085//transmembrane transport
ENSMUSG00000049723	128	176	134	12207	28086	8717	3.94	5.21	4.95	348.07	937.30	275.89	4.7	520.42	6.79087183959507	6.55321778843638e-32	2.33512993861283e-29	Mmp12	matrix metallopeptidase 12 [Source:MGI Symbol;Acc:MGI:97005]	-	-	-	-	GO:0005576//extracellular region;GO:0005615//extracellular space;GO:0005634//nucleus;GO:0005737//cytoplasm;GO:0031012//extracellular matrix	GO:0001047//core promoter binding;GO:0004222//metalloendopeptidase activity;GO:0005509//calcium ion binding;GO:0005518//collagen binding;GO:0008233//peptidase activity;GO:0008237//metallopeptidase activity;GO:0008270//zinc ion binding;GO:0016787//hydrolase activity;GO:0043565//sequence-specific DNA binding;GO:0046872//metal ion binding	GO:0000122//negative regulation of transcription from RNA polymerase II promoter;GO:0006508//proteolysis;GO:0006606//protein import into nucleus;GO:0010628//positive regulation of gene expression;GO:0030198//extracellular matrix organization;GO:0030574//collagen catabolic process;GO:0035313//wound healing, spreading of epidermal cells;GO:0042060//wound healing;GO:0045944//positive regulation of t…
ENSMUSG00000047222	4	1	0	360	349	388	0.24	0.06	0.00	21.01	23.67	25.00	0.1	23.2266666666667	7.85963831299035	3.12700762761037e-31	1.09003407192896e-28	Rnase2a	ribonuclease, RNase A family, 2A (liver, eosinophil-derived neurotoxin) [Source:MGI Symbol;Acc:MGI:1890465]	-	-	-	-	-	GO:0003676//nucleic acid binding;GO:0004518//nuclease activity;GO:0004519//endonuclease activity;GO:0004540//ribonuclease activity;GO:0016787//hydrolase activity	GO:0090305//nucleic acid phosphodiester bond hydrolysis;GO:0090501//RNA phosphodiester bond hydrolysis
ENSMUSG00000094006	28	56	27	1091	399	690	3.20	6.36	3.22	119.35	50.68	83.39	4.26	84.4733333333333	4.30957064559975	3.63273732200781e-31	1.23938176507224e-28	Igkv4-59	immunoglobulin kappa variable 4-59 [Source:MGI Symbol;Acc:MGI:3646808]	-	-	-	-	GO:0005615//extracellular space	-	GO:0002377//immunoglobulin production;GO:0006955//immune response
ENSMUSG00000095863	4	1	2	267	339	249	0.48	0.12	0.25	30.63	45.19	31.54	0.283333333333333	35.7866666666667	6.98077802006248	5.0329780520345e-31	1.68132923050778e-28	Ighv1-67	immunoglobulin heavy variable V1-67 [Source:MGI Symbol;Acc:MGI:3645228]	Environmental Information Processing;Human Diseases;Human Diseases;Environmental Information Processing;Cellular Processes;Human Diseases;Human Diseases;Environmental Information Processing;Human Diseases;Human Diseases;Human Diseases;Environmental Information Processing;Organismal Systems;Human Diseases;Human Diseases;Organismal Systems;Organismal Systems;Human Diseases;Organismal Systems;Human …	Signal transduction;Infectious diseases;Infectious diseases;Signal transduction;Transport and catabolism;Cancers;Infectious diseases;Signal transduction;Immune diseases;Infectious diseases;Infectious diseases;Signal transduction;Immune system;Immune diseases;Cardiovascular diseases;Immune system;Immune system;Cardiovascular diseases;Immune system;Immune diseases;Infectious diseases;Immune system;…	ko04151//PI3K-Akt signaling pathway;ko05169//Epstein-Barr virus infection;ko05130//Pathogenic Escherichia coli infection;ko04020//Calcium signaling pathway;ko04145//Phagosome;ko05202//Transcriptional misregulation in cancers;ko05152//Tuberculosis;ko04072//Phospholipase D signaling pathway;ko05322//Systemic lupus erythematosus;ko05150//Staphylococcus aureus infection;ko05146//Amoebiasis;ko04064//N…	K06856;K06856;K06856;K06856;K06856;K06856;K06856;K06856;K06856;K06856;K06856;K06856;K06856;K06856;K06856;K06856;K06856;K06856;K06856;K06856;K06856;K06856;K06856;K06856;K06856;K06856;K06856	GO:0009897//external side of plasma membrane;GO:0042571//immunoglobulin complex, circulating	GO:0003823//antigen binding;GO:0034987//immunoglobulin receptor binding	GO:0006910//phagocytosis, recognition;GO:0006911//phagocytosis, engulfment;GO:0006958//complement activation, classical pathway;GO:0042742//defense response to bacterium;GO:0045087//innate immune response;GO:0050853//B cell receptor signaling pathway;GO:0050871//positive regulation of B cell activation
ENSMUSG00000040613	281	285	223	1061	1422	1084	5.47	5.89	4.48	20.28	31.01	22.46	5.28	24.5833333333333	2.21907071394432	5.5667553972306e-31	1.82169230193046e-28	Apobec1	apolipoprotein B mRNA editing enzyme, catalytic polypeptide 1 [Source:MGI Symbol;Acc:MGI:103298]	-	-	-	-	GO:0005634//nucleus;GO:0005737//cytoplasm	GO:0003723//RNA binding;GO:0003729//mRNA binding;GO:0003824//catalytic activity;GO:0004126//cytidine deaminase activity;GO:0004131//cytosine deaminase activity;GO:0005515//protein binding;GO:0008047//enzyme activator activity;GO:0008270//zinc ion binding;GO:0016787//hydrolase activity;GO:0019904//protein domain specific binding;GO:0035925//mRNA 3'-UTR AU-rich region binding;GO:0043021//ribonucleo…	GO:0006397//mRNA processing;GO:0006641//triglyceride metabolic process;GO:0006970//response to osmotic stress;GO:0009972//cytidine deamination;GO:0010043//response to zinc ion;GO:0010332//response to gamma radiation;GO:0016554//cytidine to uridine editing;GO:0016556//mRNA modification;GO:0032869//cellular response to insulin stimulus;GO:0042127//regulation of cell proliferation;GO:0042157//lipopr…
ENSMUSG00000020651	36	55	56	509	1352	866	0.49	0.75	1.29	7.52	20.57	12.52	0.843333333333333	13.5366666666667	4.00462573723002	6.52611033239825e-31	2.09292358360012e-28	Slc26a4	solute carrier family 26, member 4 [Source:MGI Symbol;Acc:MGI:1346029]	Organismal Systems	Endocrine system	ko04918//Thyroid hormone synthesis	K14702	GO:0005886//plasma membrane;GO:0005887//integral component of plasma membrane;GO:0016020//membrane;GO:0016021//integral component of membrane;GO:0016324//apical plasma membrane;GO:0031526//brush border membrane;GO:0070062//extracellular exosome	GO:0008271//secondary active sulfate transmembrane transporter activity;GO:0008509//anion transmembrane transporter activity;GO:0015106//bicarbonate transmembrane transporter activity;GO:0015108//chloride transmembrane transporter activity;GO:0015111//iodide transmembrane transporter activity;GO:0015116//sulfate transmembrane transporter activity;GO:0015301//anion:anion antiporter activity;GO:001…	GO:0006885//regulation of pH;GO:0008272//sulfate transport;GO:0009887//organ morphogenesis;GO:0015698//inorganic anion transport;GO:0015701//bicarbonate transport;GO:0015705//iodide transport;GO:0019532//oxalate transport;GO:0032880//regulation of protein localization;GO:0055085//transmembrane transport;GO:0098656//anion transmembrane transport;GO:1902358//sulfate transmembrane transport;GO:19024…
ENSMUSG00000095612	14	22	9	1302	2441	909	1.39	2.16	0.93	123.37	268.79	95.11	1.49333333333333	162.423333333333	6.76507885961668	3.1695189145543e-30	9.86978268650748e-28	Ighv5-4	immunoglobulin heavy variable 5-4 [Source:MGI Symbol;Acc:MGI:4439895]	Environmental Information Processing;Human Diseases;Human Diseases;Environmental Information Processing;Cellular Processes;Human Diseases;Human Diseases;Environmental Information Processing;Human Diseases;Human Diseases;Human Diseases;Environmental Information Processing;Organismal Systems;Human Diseases;Human Diseases;Organismal Systems;Organismal Systems;Human Diseases;Organismal Systems;Human …	Signal transduction;Infectious diseases;Infectious diseases;Signal transduction;Transport and catabolism;Cancers;Infectious diseases;Signal transduction;Immune diseases;Infectious diseases;Infectious diseases;Signal transduction;Immune system;Immune diseases;Cardiovascular diseases;Immune system;Immune system;Cardiovascular diseases;Immune system;Immune diseases;Infectious diseases;Immune system;…	ko04151//PI3K-Akt signaling pathway;ko05169//Epstein-Barr virus infection;ko05130//Pathogenic Escherichia coli infection;ko04020//Calcium signaling pathway;ko04145//Phagosome;ko05202//Transcriptional misregulation in cancers;ko05152//Tuberculosis;ko04072//Phospholipase D signaling pathway;ko05322//Systemic lupus erythematosus;ko05150//Staphylococcus aureus infection;ko05146//Amoebiasis;ko04064//N…	K06856;K06856;K06856;K06856;K06856;K06856;K06856;K06856;K06856;K06856;K06856;K06856;K06856;K06856;K06856;K06856;K06856;K06856;K06856;K06856;K06856;K06856;K06856;K06856;K06856;K06856;K06856	GO:0009897//external side of plasma membrane;GO:0042571//immunoglobulin complex, circulating	GO:0003823//antigen binding;GO:0034987//immunoglobulin receptor binding	GO:0006910//phagocytosis, recognition;GO:0006911//phagocytosis, engulfment;GO:0006958//complement activation, classical pathway;GO:0042742//defense response to bacterium;GO:0045087//innate immune response;GO:0050853//B cell receptor signaling pathway;GO:0050871//positive regulation of B cell activation
ENSMUSG00000051998	17	10	14	251	151	230	1.11	0.56	0.75	6.17	3.06	4.43	0.806666666666667	4.55333333333333	2.49687853101549	3.20067789023005e-30	9.86978268650748e-28	Lax1	lymphocyte transmembrane adaptor 1 [Source:MGI Symbol;Acc:MGI:2443362]	-	-	-	-	GO:0005794//Golgi apparatus;GO:0005829//cytosol;GO:0005886//plasma membrane;GO:0016020//membrane;GO:0016021//integral component of membrane	GO:0019901//protein kinase binding;GO:0042169//SH2 domain binding	GO:0000188//inactivation of MAPK activity;GO:0002250//adaptive immune response;GO:0002376//immune system process;GO:0006955//immune response;GO:0035556//intracellular signal transduction;GO:0042113//B cell activation;GO:0046649//lymphocyte activation;GO:0048305//immunoglobulin secretion;GO:0050851//antigen receptor-mediated signaling pathway;GO:0050868//negative regulation of T cell activation;GO…
ENSMUSG00000030789	1790	1849	1631	6680	9054	5938	18.80	19.22	18.05	67.53	106.98	66.33	18.69	80.28	2.10277404761746	5.01242410625201e-30	1.51649472724058e-27	Itgax	integrin alpha X [Source:MGI Symbol;Acc:MGI:96609]	Human Diseases;Cellular Processes;Organismal Systems	Infectious diseases;Cell motility;Immune system	ko05152//Tuberculosis;ko04810//Regulation of actin cytoskeleton;ko04610//Complement and coagulation cascades	K06462;K06462;K06462	GO:0008305//integrin complex;GO:0009897//external side of plasma membrane;GO:0009986//cell surface;GO:0016020//membrane;GO:0016021//integral component of membrane	GO:0030971//receptor tyrosine kinase binding;GO:0046872//metal ion binding	GO:0007155//cell adhesion;GO:0007229//integrin-mediated signaling pathway;GO:0008284//positive regulation of cell proliferation;GO:0010628//positive regulation of gene expression;GO:0030335//positive regulation of cell migration;GO:0031643//positive regulation of myelination;GO:0034113//heterotypic cell-cell adhesion;GO:0045766//positive regulation of angiogenesis;GO:0051607//defense response to …
ENSMUSG00000027009	2020	1898	1678	3928	3823	3975	12.74	13.25	12.46	26.05	32.04	26.86	12.8166666666667	28.3166666666667	1.14363034922239	1.38323607362058e-29	4.03276189827381e-27	Itga4	integrin alpha 4 [Source:MGI Symbol;Acc:MGI:96603]	Environmental Information Processing;Human Diseases;Cellular Processes;Human Diseases;Organismal Systems;Cellular Processes;Human Diseases;Environmental Information Processing;Organismal Systems;Human Diseases;Organismal Systems;Human Diseases;Environmental Information Processing;Human Diseases	Signal transduction;Infectious diseases;Cell motility;Cardiovascular diseases;Immune system;Cellular community - eukaryotes;Infectious diseases;Signaling molecules and interaction;Immune system;Infectious disease: bacterial;Immune system;Cardiovascular diseases;Signaling molecules and interaction;Cardiovascular diseases	ko04151//PI3K-Akt signaling pathway;ko05165//Human papillomavirus infection;ko04810//Regulation of actin cytoskeleton;ko05414//Dilated cardiomyopathy (DCM);ko04640//Hematopoietic cell lineage;ko04510//Focal adhesion;ko05140//Leishmaniasis;ko04514//Cell adhesion molecules (CAMs);ko04672//Intestinal immune network for IgA production;ko05135//Yersinia infection;ko04670//Leukocyte transendothelial mi…	K06483;K06483;K06483;K06483;K06483;K06483;K06483;K06483;K06483;K06483;K06483;K06483;K06483;K06483	GO:0005623//cell;GO:0005886//plasma membrane;GO:0008305//integrin complex;GO:0009986//cell surface;GO:0016020//membrane;GO:0016021//integral component of membrane;GO:0030426//growth cone;GO:0034669//integrin alpha4-beta7 complex;GO:0043025//neuronal cell body;GO:0070062//extracellular exosome	GO:0001968//fibronectin binding;GO:0003823//antigen binding;GO:0019960//C-X3-C chemokine binding;GO:0050839//cell adhesion molecule binding;GO:1990405//protein antigen binding	GO:0002687//positive regulation of leukocyte migration;GO:0003366//cell-matrix adhesion involved in ameboidal cell migration;GO:0007155//cell adhesion;GO:0007159//leukocyte cell-cell adhesion;GO:0007160//cell-matrix adhesion;GO:0007229//integrin-mediated signaling pathway;GO:0033631//cell-cell adhesion mediated by integrin;GO:0034113//heterotypic cell-cell adhesion;GO:0034446//substrate adhesion-…
ENSMUSG00000002565	13	11	21	201	269	201	0.18	0.15	0.31	2.70	4.20	2.98	0.213333333333333	3.29333333333333	3.94836723158468	3.00968236172244e-29	8.61790297682488e-27	Scin	scinderin [Source:MGI Symbol;Acc:MGI:1306794]	Human Diseases;Cellular Processes;Organismal Systems	Cancers;Cell motility;Immune system	ko05203//Viral carcinogenesis;ko04810//Regulation of actin cytoskeleton;ko04666//Fc gamma R-mediated phagocytosis	K05768;K05768;K05768	GO:0002102//podosome;GO:0005623//cell;GO:0005737//cytoplasm;GO:0005856//cytoskeleton;GO:0005886//plasma membrane;GO:0005903//brush border;GO:0030054//cell junction;GO:0032991//macromolecular complex;GO:0042995//cell projection	GO:0003779//actin binding;GO:0005509//calcium ion binding;GO:0046872//metal ion binding;GO:0051015//actin filament binding	GO:0008285//negative regulation of cell proliferation;GO:0032330//regulation of chondrocyte differentiation;GO:0042989//sequestering of actin monomers;GO:0043065//positive regulation of apoptotic process;GO:0045654//positive regulation of megakaryocyte differentiation;GO:0051014//actin filament severing;GO:0051127//positive regulation of actin nucleation;GO:0051693//actin filament capping
ENSMUSG00000024112	35	23	26	316	254	200	0.22	0.12	0.14	1.83	1.45	1.08	0.16	1.45333333333333	3.18322182405577	4.21806097406022e-29	1.18660715296589e-26	Cacna1h	calcium channel, voltage-dependent, T type, alpha 1H subunit [Source:MGI Symbol;Acc:MGI:1928842]	Environmental Information Processing;Environmental Information Processing;Human Diseases;Organismal Systems;Organismal Systems;Organismal Systems;Organismal Systems	Signal transduction;Signal transduction;Endocrine and metabolic diseases;Environmental adaptation;Endocrine system;Endocrine system;Endocrine system	ko04020//Calcium signaling pathway;ko04010//MAPK signaling pathway;ko04934//Cushing syndrome;ko04713//Circadian entrainment;ko04925//Aldosterone synthesis and secretion;ko04927//Cortisol synthesis and secretion;ko04929//GnRH secretion	K04855;K04855;K04855;K04855;K04855;K04855;K04855	GO:0005887//integral component of plasma membrane;GO:0005891//voltage-gated calcium channel complex;GO:0016020//membrane;GO:0016021//integral component of membrane	GO:0005216//ion channel activity;GO:0005244//voltage-gated ion channel activity;GO:0005245//voltage-gated calcium channel activity;GO:0008332//low voltage-gated calcium channel activity;GO:0097110//scaffold protein binding	GO:0006811//ion transport;GO:0019228//neuronal action potential;GO:0030317//sperm motility;GO:0032342//aldosterone biosynthetic process;GO:0032870//cellular response to hormone stimulus;GO:0034220//ion transmembrane transport;GO:0034651//cortisol biosynthetic process;GO:0035865//cellular response to potassium ion;GO:0042391//regulation of membrane potential;GO:0055085//transmembrane transport;GO:…
ENSMUSG00000094951	3	4	4	199	412	224	0.39	0.44	0.51	22.68	54.63	28.21	0.446666666666667	35.1733333333333	6.29913965879377	1.1151266841008e-28	3.08294075509592e-26	Ighv5-6	immunoglobulin heavy variable 5-6 [Source:MGI Symbol;Acc:MGI:4439815]	Environmental Information Processing;Human Diseases;Human Diseases;Environmental Information Processing;Cellular Processes;Human Diseases;Human Diseases;Environmental Information Processing;Human Diseases;Human Diseases;Human Diseases;Environmental Information Processing;Organismal Systems;Human Diseases;Human Diseases;Organismal Systems;Organismal Systems;Human Diseases;Organismal Systems;Human …	Signal transduction;Infectious diseases;Infectious diseases;Signal transduction;Transport and catabolism;Cancers;Infectious diseases;Signal transduction;Immune diseases;Infectious diseases;Infectious diseases;Signal transduction;Immune system;Immune diseases;Cardiovascular diseases;Immune system;Immune system;Cardiovascular diseases;Immune system;Immune diseases;Infectious diseases;Immune system;…	ko04151//PI3K-Akt signaling pathway;ko05169//Epstein-Barr virus infection;ko05130//Pathogenic Escherichia coli infection;ko04020//Calcium signaling pathway;ko04145//Phagosome;ko05202//Transcriptional misregulation in cancers;ko05152//Tuberculosis;ko04072//Phospholipase D signaling pathway;ko05322//Systemic lupus erythematosus;ko05150//Staphylococcus aureus infection;ko05146//Amoebiasis;ko04064//N…	K06856;K06856;K06856;K06856;K06856;K06856;K06856;K06856;K06856;K06856;K06856;K06856;K06856;K06856;K06856;K06856;K06856;K06856;K06856;K06856;K06856;K06856;K06856;K06856;K06856;K06856;K06856	GO:0009897//external side of plasma membrane;GO:0042571//immunoglobulin complex, circulating	GO:0003823//antigen binding;GO:0034987//immunoglobulin receptor binding	GO:0006910//phagocytosis, recognition;GO:0006911//phagocytosis, engulfment;GO:0006958//complement activation, classical pathway;GO:0042742//defense response to bacterium;GO:0045087//innate immune response;GO:0050853//B cell receptor signaling pathway;GO:0050871//positive regulation of B cell activation
ENSMUSG00000004552	377	448	362	1021	1005	1094	7.48	8.80	7.49	19.34	22.12	22.88	7.92333333333333	21.4466666666667	1.43657403271031	1.29809771319688e-28	3.52796556459524e-26	Ctse	cathepsin E [Source:MGI Symbol;Acc:MGI:107361]	Cellular Processes	Transport and catabolism	ko04142//Lysosome	K01382	GO:0005768//endosome	GO:0004190//aspartic-type endopeptidase activity;GO:0008233//peptidase activity;GO:0016787//hydrolase activity;GO:0042802//identical protein binding	GO:0006508//proteolysis;GO:0016540//protein autoprocessing;GO:0019886//antigen processing and presentation of exogenous peptide antigen via MHC class II;GO:0030163//protein catabolic process
ENSMUSG00000098814	11	26	11	278	223	412	1.28	2.99	1.33	30.84	28.74	50.47	1.86666666666667	36.6833333333333	4.29658850783395	2.08900894378397e-28	5.58287640226266e-26	Igkv19-93	immunoglobulin kappa chain variable 19-93 [Source:MGI Symbol;Acc:MGI:107617]	-	-	-	-	GO:0005615//extracellular space	-	GO:0002377//immunoglobulin production;GO:0006955//immune response
ENSMUSG00000062593	376	374	268	1069	1121	1105	10.26	9.81	7.59	28.35	34.36	32.49	9.22	31.7333333333333	1.78316041704481	3.93818528290334e-28	1.03522624608779e-25	Gm49339	predicted gene, 49339 [Source:MGI Symbol;Acc:MGI:6121530]	Organismal Systems;Organismal Systems	Immune system;Development	ko04662//B cell receptor signaling pathway;ko04380//Osteoclast differentiation	K06512;K06512	GO:0005886//plasma membrane;GO:0009897//external side of plasma membrane;GO:0016020//membrane;GO:0016021//integral component of membrane	-	GO:0001780//neutrophil homeostasis;GO:0002250//adaptive immune response;GO:0002376//immune system process;GO:0002437//inflammatory response to antigenic stimulus;GO:0006954//inflammatory response;GO:0007596//blood coagulation;GO:0009611//response to wounding;GO:0009624//response to nematode;GO:0009991//response to extracellular stimulus;GO:0032496//response to lipopolysaccharide;GO:0035739//CD4-p…
ENSMUSG00000062778	1804	1650	1653	6893	12078	7942	46.02	41.01	43.57	166.15	340.10	213.20	43.5333333333333	239.816666666667	2.46173952981913	4.73995208423129e-28	1.22588922049433e-25	Chia1	chitinase, acidic 1 [Source:MGI Symbol;Acc:MGI:1932052]	Metabolism;Metabolism	Global and overview maps;Carbohydrate metabolism	ko01100//Metabolic pathways;ko00520//Amino sugar and nucleotide sugar metabolism	K01183;K01183	GO:0005576//extracellular region;GO:0005615//extracellular space;GO:0005737//cytoplasm	GO:0004553//hydrolase activity, hydrolyzing O-glycosyl compounds;GO:0004568//chitinase activity;GO:0008061//chitin binding;GO:0016787//hydrolase activity;GO:0016798//hydrolase activity, acting on glycosyl bonds;GO:0019900//kinase binding	GO:0000272//polysaccharide catabolic process;GO:0001878//response to yeast;GO:0002376//immune system process;GO:0002532//production of molecular mediator involved in inflammatory response;GO:0005975//carbohydrate metabolic process;GO:0006030//chitin metabolic process;GO:0006032//chitin catabolic process;GO:0006915//apoptotic process;GO:0006954//inflammatory response;GO:0006955//immune response;GO…
ENSMUSG00000079293	1111	1782	1441	5345	5332	4792	26.42	46.27	41.82	134.69	159.47	140.59	38.17	144.916666666667	1.9247124351446	1.08317378391369e-27	2.75693517858031e-25	Clec7a	C-type lectin domain family 7, member a [Source:MGI Symbol;Acc:MGI:1861431]	Cellular Processes;Human Diseases;Organismal Systems	Transport and catabolism;Infectious diseases;Immune system	ko04145//Phagosome;ko05152//Tuberculosis;ko04625//C-type lectin receptor signaling pathway	K10074;K10074;K10074	GO:0005886//plasma membrane;GO:0016020//membrane;GO:0016021//integral component of membrane	GO:0001872//(1->3)-beta-D-glucan binding;GO:0005515//protein binding;GO:0030246//carbohydrate binding;GO:0046872//metal ion binding	GO:0002366//leukocyte activation involved in immune response;GO:0002367//cytokine production involved in immune response;GO:0002376//immune system process;GO:0002732//positive regulation of dendritic cell cytokine production;GO:0006954//inflammatory response;GO:0032874//positive regulation of stress-activated MAPK cascade;GO:0045087//innate immune response;GO:0050731//positive regulation of pepti…
ENSMUSG00000023992	96	113	111	919	1282	583	5.10	5.53	5.55	41.19	67.32	30.50	5.39333333333333	46.3366666666667	3.10290515734508	1.37901795601093e-27	3.45508639447427e-25	Trem2	triggering receptor expressed on myeloid cells 2 [Source:MGI Symbol;Acc:MGI:1913150]	Organismal Systems	Development	ko04380//Osteoclast differentiation	K14378	GO:0005576//extracellular region;GO:0005886//plasma membrane;GO:0005887//integral component of plasma membrane;GO:0016020//membrane;GO:0016021//integral component of membrane;GO:0031226//intrinsic component of plasma membrane	GO:0001530//lipopolysaccharide binding;GO:0001540//beta-amyloid binding;GO:0004888//transmembrane signaling receptor activity;GO:0005515//protein binding;GO:0005543//phospholipid binding;GO:0008035//high-density lipoprotein particle binding;GO:0008289//lipid binding;GO:0030169//low-density lipoprotein particle binding;GO:0034185//apolipoprotein binding;GO:0034186//apolipoprotein A-I binding;GO:00…	GO:0001774//microglial cell activation;GO:0001934//positive regulation of protein phosphorylation;GO:0002282//microglial cell activation involved in immune response;GO:0002588//positive regulation of antigen processing and presentation of peptide antigen via MHC class II;GO:0002931//response to ischemia;GO:0006911//phagocytosis, engulfment;GO:0010468//regulation of gene expression;GO:0010507//neg…
ENSMUSG00000076583	27	18	11	246	265	453	3.12	2.06	1.32	27.14	33.97	55.18	2.16666666666667	38.7633333333333	4.16114351366667	2.01788355734308e-27	4.97796351415327e-25	Igkv8-24	immunoglobulin kappa chain variable 8-24 [Source:MGI Symbol;Acc:MGI:4947958]	-	-	-	-	GO:0005615//extracellular space	-	GO:0002377//immunoglobulin production;GO:0006955//immune response
ENSMUSG00000017400	47	78	50	411	505	350	0.65	1.07	0.72	5.43	7.75	5.10	0.813333333333333	6.09333333333333	2.90531301749518	2.11581297616169e-27	5.14046379890192e-25	Stac2	SH3 and cysteine rich domain 2 [Source:MGI Symbol;Acc:MGI:2144518]	-	-	-	-	GO:0005737//cytoplasm;GO:0005829//cytosol;GO:0005886//plasma membrane;GO:0016020//membrane;GO:0031234//extrinsic component of cytoplasmic side of plasma membrane;GO:0042383//sarcolemma	GO:0003674//molecular_function;GO:0005515//protein binding;GO:0046872//metal ion binding	GO:0003009//skeletal muscle contraction;GO:0035556//intracellular signal transduction;GO:1901387//positive regulation of voltage-gated calcium channel activity;GO:1903078//positive regulation of protein localization to plasma membrane
ENSMUSG00000036887	662	386	411	2128	2188	2419	26.85	15.51	17.37	82.39	98.44	103.42	19.91	94.75	2.25063272222531	3.7114189568107e-27	8.88247805559099e-25	C1qa	complement component 1, q subcomponent, alpha polypeptide [Source:MGI Symbol;Acc:MGI:88223]	Human Diseases;Human Diseases;Human Diseases;Organismal Systems;Human Diseases;Human Diseases	Immune diseases;Infectious diseases;Infectious diseases;Immune system;Infectious diseases;Neurodegenerative diseases	ko05322//Systemic lupus erythematosus;ko05150//Staphylococcus aureus infection;ko05142//Chagas disease (American trypanosomiasis);ko04610//Complement and coagulation cascades;ko05133//Pertussis;ko05020//Prion diseases	K03986;K03986;K03986;K03986;K03986;K03986	GO:0005576//extracellular region;GO:0005581//collagen trimer;GO:0005615//extracellular space;GO:0005623//cell;GO:0045202//synapse;GO:0098794//postsynapse	GO:0005515//protein binding	GO:0001774//microglial cell activation;GO:0002376//immune system process;GO:0006958//complement activation, classical pathway;GO:0007568//aging;GO:0010039//response to iron ion;GO:0016322//neuron remodeling;GO:0045087//innate immune response;GO:0048143//astrocyte activation;GO:0050808//synapse organization;GO:1901216//positive regulation of neuron death
ENSMUSG00000032332	1724	1533	1315	453	518	507	6.56	5.81	5.38	1.70	2.27	2.06	5.91666666666667	2.01	-1.55758911737932	5.86127289492608e-27	1.38213986573735e-24	Col12a1	collagen, type XII, alpha 1 [Source:MGI Symbol;Acc:MGI:88448]	Organismal Systems	Digestive system	ko04974//Protein digestion and absorption	K08132	GO:0005576//extracellular region;GO:0005581//collagen trimer;GO:0005595//collagen type XII trimer;GO:0005615//extracellular space;GO:0031012//extracellular matrix	GO:0005515//protein binding;GO:0030020//extracellular matrix structural constituent conferring tensile strength	GO:0003429//growth plate cartilage chondrocyte morphogenesis;GO:0007155//cell adhesion;GO:0035987//endodermal cell differentiation
ENSMUSG00000118607	10	8	6	132	171	178	0.16	0.12	0.09	1.90	2.85	2.82	0.123333333333333	2.52333333333333	4.35469612435678	6.30116121755304e-27	1.46433507425309e-24	AC147806.2	predicted 7592 [Source:NCBI gene;Acc:101055758]	-	-	-	-	GO:0005634//nucleus;GO:0016021//integral component of membrane	GO:0004930//G-protein coupled receptor activity	GO:0007186//G-protein coupled receptor signaling pathway
ENSMUSG00000003418	190	226	186	813	760	587	1.74	1.97	1.83	6.89	9.28	4.90	1.84666666666667	7.02333333333333	1.92723243276811	7.11194434669556e-27	1.62914325141805e-24	St8sia6	ST8 alpha-N-acetyl-neuraminide alpha-2,8-sialyltransferase 6 [Source:MGI Symbol;Acc:MGI:2386797]	-	-	-	-	GO:0000139//Golgi membrane;GO:0005794//Golgi apparatus;GO:0016020//membrane;GO:0016021//integral component of membrane	GO:0008373//sialyltransferase activity;GO:0016740//transferase activity;GO:0016757//transferase activity, transferring glycosyl groups	GO:0001574//ganglioside biosynthetic process;GO:0001835//blastocyst hatching;GO:0006486//protein glycosylation;GO:0006493//protein O-linked glycosylation;GO:0009100//glycoprotein metabolic process;GO:0009247//glycolipid biosynthetic process;GO:0009311//oligosaccharide metabolic process;GO:0016051//carbohydrate biosynthetic process;GO:0097503//sialylation
ENSMUSG00000024621	3274	3147	2890	5647	5428	5470	47.31	38.68	41.50	90.11	86.54	85.63	42.4966666666667	87.4266666666667	1.04072370988026	1.70714170475097e-26	3.85549538530729e-24	Csf1r	colony stimulating factor 1 receptor [Source:MGI Symbol;Acc:MGI:1339758]	Human Diseases;Environmental Information Processing;Human Diseases;Environmental Information Processing;Environmental Information Processing;Environmental Information Processing;Environmental Information Processing;Organismal Systems;Organismal Systems;Environmental Information Processing;Human Diseases	Cancers;Signal transduction;Cancers;Signaling molecules and interaction;Signal transduction;Signal transduction;Signal transduction;Immune system;Development;Signaling molecules and interaction;Cancers	ko05200//Pathways in cancer;ko04151//PI3K-Akt signaling pathway;ko05202//Transcriptional misregulation in cancers;ko04060//Cytokine-cytokine receptor interaction;ko04010//MAPK signaling pathway;ko04014//Ras signaling pathway;ko04015//Rap1 signaling pathway;ko04640//Hematopoietic cell lineage;ko04380//Osteoclast differentiation;ko04061//Viral protein interaction with cytokine and cytokine receptor…	K05090;K05090;K05090;K05090;K05090;K05090;K05090;K05090;K05090;K05090;K05090	GO:0005654//nucleoplasm;GO:0005886//plasma membrane;GO:0005887//integral component of plasma membrane;GO:0009986//cell surface;GO:0016020//membrane;GO:0016021//integral component of membrane;GO:0043231//intracellular membrane-bounded organelle;GO:0043235//receptor complex;GO:1990682//CSF1-CSF1R complex	GO:0000166//nucleotide binding;GO:0004672//protein kinase activity;GO:0004713//protein tyrosine kinase activity;GO:0004714//transmembrane receptor protein tyrosine kinase activity;GO:0005011//macrophage colony-stimulating factor receptor activity;GO:0005515//protein binding;GO:0005524//ATP binding;GO:0016301//kinase activity;GO:0016740//transferase activity;GO:0019838//growth factor binding;GO:00…	GO:0001934//positive regulation of protein phosphorylation;GO:0002244//hematopoietic progenitor cell differentiation;GO:0002376//immune system process;GO:0002931//response to ischemia;GO:0006468//protein phosphorylation;GO:0006954//inflammatory response;GO:0007169//transmembrane receptor protein tyrosine kinase signaling pathway;GO:0007275//multicellular organism development;GO:0007411//axon guid…
ENSMUSG00000076586	15	11	24	291	642	294	1.66	1.20	2.76	30.67	78.64	34.22	1.87333333333333	47.8433333333333	4.67463837342619	2.02945134325923e-26	4.51975726238358e-24	Igkv8-21	immunoglobulin kappa variable 8-21 [Source:MGI Symbol;Acc:MGI:1330840]	-	-	-	-	GO:0005615//extracellular space	-	GO:0002377//immunoglobulin production;GO:0006955//immune response
ENSMUSG00000021356	260	384	190	1647	1304	1306	2.30	3.36	1.76	13.93	12.81	12.20	2.47333333333333	12.98	2.39176179209949	5.53806658560561e-26	1.21647805068748e-23	Irf4	interferon regulatory factor 4 [Source:MGI Symbol;Acc:MGI:1096873]	Organismal Systems	Immune system	ko04659//Th17 cell differentiation	K09445	GO:0000788//nuclear nucleosome;GO:0005634//nucleus;GO:0005654//nucleoplasm;GO:0005829//cytosol	GO:0000978//RNA polymerase II core promoter proximal region sequence-specific DNA binding;GO:0000981//RNA polymerase II transcription factor activity, sequence-specific DNA binding;GO:0001228//transcriptional activator activity, RNA polymerase II transcription regulatory region sequence-specific binding;GO:0003677//DNA binding;GO:0003700//transcription factor activity, sequence-specific DNA bindi…	GO:0002376//immune system process;GO:0006355//regulation of transcription, DNA-templated;GO:0034122//negative regulation of toll-like receptor signaling pathway;GO:0042832//defense response to protozoan;GO:0043011//myeloid dendritic cell differentiation;GO:0043388//positive regulation of DNA binding;GO:0043966//histone H3 acetylation;GO:0043967//histone H4 acetylation;GO:0045082//positive regulat…
ENSMUSG00000096638	71	65	52	1876	5955	7739	8.27	7.50	6.31	208.67	769.72	950.59	7.36	642.993333333333	6.4489542030102	1.48300614320427e-25	3.21351398733519e-23	Ighv2-9	immunoglobulin heavy variable 2-9 [Source:MGI Symbol;Acc:MGI:4439624]	Environmental Information Processing;Human Diseases;Human Diseases;Environmental Information Processing;Cellular Processes;Human Diseases;Human Diseases;Environmental Information Processing;Human Diseases;Human Diseases;Human Diseases;Environmental Information Processing;Organismal Systems;Human Diseases;Human Diseases;Organismal Systems;Organismal Systems;Human Diseases;Organismal Systems;Human …	Signal transduction;Infectious diseases;Infectious diseases;Signal transduction;Transport and catabolism;Cancers;Infectious diseases;Signal transduction;Immune diseases;Infectious diseases;Infectious diseases;Signal transduction;Immune system;Immune diseases;Cardiovascular diseases;Immune system;Immune system;Cardiovascular diseases;Immune system;Immune diseases;Infectious diseases;Immune system;…	ko04151//PI3K-Akt signaling pathway;ko05169//Epstein-Barr virus infection;ko05130//Pathogenic Escherichia coli infection;ko04020//Calcium signaling pathway;ko04145//Phagosome;ko05202//Transcriptional misregulation in cancers;ko05152//Tuberculosis;ko04072//Phospholipase D signaling pathway;ko05322//Systemic lupus erythematosus;ko05150//Staphylococcus aureus infection;ko05146//Amoebiasis;ko04064//N…	K06856;K06856;K06856;K06856;K06856;K06856;K06856;K06856;K06856;K06856;K06856;K06856;K06856;K06856;K06856;K06856;K06856;K06856;K06856;K06856;K06856;K06856;K06856;K06856;K06856;K06856;K06856	GO:0009897//external side of plasma membrane;GO:0042571//immunoglobulin complex, circulating	GO:0003823//antigen binding;GO:0034987//immunoglobulin receptor binding	GO:0006910//phagocytosis, recognition;GO:0006911//phagocytosis, engulfment;GO:0006958//complement activation, classical pathway;GO:0042742//defense response to bacterium;GO:0045087//innate immune response;GO:0050853//B cell receptor signaling pathway;GO:0050871//positive regulation of B cell activation
ENSMUSG00000076552	5	4	1	2379	1274	542	0.55	0.48	0.09	250.73	156.05	63.10	0.373333333333333	156.626666666667	8.712649819581	5.3667530507277e-25	1.14741180224558e-22	Igkv4-61	immunoglobulin kappa chain variable 4-61 [Source:MGI Symbol;Acc:MGI:4439819]	-	-	-	-	GO:0005615//extracellular space	-	GO:0002377//immunoglobulin production;GO:0006955//immune response
ENSMUSG00000011034	146	157	136	560	554	425	1.50	1.60	1.46	5.49	6.32	4.60	1.52	5.47	1.84746950934897	8.84158497891879e-25	1.86545809390741e-22	Slc5a1	solute carrier family 5 (sodium/glucose cotransporter), member 1 [Source:MGI Symbol;Acc:MGI:107678]	Organismal Systems;Organismal Systems;Organismal Systems	Digestive system;Digestive system;Digestive system	ko04976//Bile secretion;ko04978//Mineral absorption;ko04973//Carbohydrate digestion and absorption	K14158;K14158;K14158	GO:0005911//cell-cell junction;GO:0016020//membrane;GO:0016021//integral component of membrane;GO:0016324//apical plasma membrane;GO:0031526//brush border membrane	GO:0005412//glucose:sodium symporter activity;GO:0022857//transmembrane transporter activity	GO:0055085//transmembrane transport;GO:1904659//glucose transmembrane transport
ENSMUSG00000066108	2175	1379	2754	13403	9792	9703	6.13	3.85	8.09	36.06	30.62	28.83	6.02333333333333	31.8366666666667	2.40205528658068	1.32620228916719e-24	2.7617732086748e-22	Muc5b	mucin 5, subtype B, tracheobronchial [Source:MGI Symbol;Acc:MGI:1921430]	Organismal Systems;Organismal Systems	Immune system;Digestive system	ko04657//IL-17 signaling pathway;ko04970//Salivary secretion	K13908;K13908	GO:0005576//extracellular region;GO:0005615//extracellular space;GO:0043231//intracellular membrane-bounded organelle	GO:0003674//molecular_function;GO:0005515//protein binding	GO:0042742//defense response to bacterium;GO:0043030//regulation of macrophage activation
ENSMUSG00000030104	2844	2457	2367	5685	5698	5082	20.60	17.63	17.87	39.29	46.66	38.79	18.7	41.58	1.15285148808337	3.98252462605347e-24	8.18715158702147e-22	Edem1	ER degradation enhancer, mannosidase alpha-like 1 [Source:MGI Symbol;Acc:MGI:2180139]	Genetic Information Processing	Folding, sorting and degradation	ko04141//Protein processing in endoplasmic reticulum	K10084	GO:0005783//endoplasmic reticulum;GO:0005789//endoplasmic reticulum membrane;GO:0016020//membrane;GO:0016021//integral component of membrane;GO:0016235//aggresome;GO:0030176//integral component of endoplasmic reticulum membrane;GO:0044322//endoplasmic reticulum quality control compartment	GO:0003824//catalytic activity;GO:0004571//mannosyl-oligosaccharide 1,2-alpha-mannosidase activity;GO:0005509//calcium ion binding;GO:0005515//protein binding;GO:0016787//hydrolase activity;GO:0016798//hydrolase activity, acting on glycosyl bonds;GO:0051787//misfolded protein binding	GO:0006986//response to unfolded protein;GO:0008152//metabolic process;GO:0030433//ER-associated ubiquitin-dependent protein catabolic process;GO:0036510//trimming of terminal mannose on C branch;GO:0097466//glycoprotein ERAD pathway;GO:1904154//positive regulation of retrograde protein transport, ER to cytosol;GO:1904382//mannose trimming involved in glycoprotein ERAD pathway
ENSMUSG00000061132	125	188	147	686	876	613	2.95	4.00	3.22	14.78	20.79	14.19	3.39	16.5866666666667	2.29066680627311	5.83911287687476e-24	1.18519208836312e-21	Blnk	B cell linker [Source:MGI Symbol;Acc:MGI:96878]	Human Diseases;Environmental Information Processing;Organismal Systems;Human Diseases;Organismal Systems	Infectious diseases;Signal transduction;Immune system;Immune diseases;Development	ko05169//Epstein-Barr virus infection;ko04064//NF-kappa B signaling pathway;ko04662//B cell receptor signaling pathway;ko05340//Primary immunodeficiency;ko04380//Osteoclast differentiation	K07371;K07371;K07371;K07371;K07371	GO:0005737//cytoplasm;GO:0005886//plasma membrane;GO:0016020//membrane;GO:0036464//cytoplasmic ribonucleoprotein granule	GO:0005070//SH3/SH2 adaptor activity;GO:0005515//protein binding	GO:0007169//transmembrane receptor protein tyrosine kinase signaling pathway;GO:0009967//positive regulation of signal transduction;GO:0035556//intracellular signal transduction;GO:0042113//B cell activation
ENSMUSG00000031444	131	123	146	611	742	480	2.96	2.64	3.20	12.69	18.10	11.39	2.93333333333333	14.06	2.26098366626903	6.34087688198502e-24	1.27094951003287e-21	F10	coagulation factor X [Source:MGI Symbol;Acc:MGI:103107]	Organismal Systems	Immune system	ko04610//Complement and coagulation cascades	K01314	GO:0005576//extracellular region;GO:0005615//extracellular space;GO:0005783//endoplasmic reticulum;GO:0016020//membrane;GO:0043231//intracellular membrane-bounded organelle	GO:0004252//serine-type endopeptidase activity;GO:0005509//calcium ion binding;GO:0005543//phospholipid binding;GO:0008233//peptidase activity;GO:0008236//serine-type peptidase activity;GO:0016787//hydrolase activity	GO:0006508//proteolysis;GO:0007596//blood coagulation;GO:0007599//hemostasis;GO:0051897//positive regulation of protein kinase B signaling
ENSMUSG00000096715	7	2	7	123	218	246	0.82	0.23	0.85	13.76	28.33	30.38	0.633333333333333	24.1566666666667	5.2533125706538	8.46997603943849e-24	1.67674155299255e-21	Igkv3-4	immunoglobulin kappa variable 3-4 [Source:MGI Symbol;Acc:MGI:1330855]	-	-	-	-	GO:0005615//extracellular space	-	GO:0002377//immunoglobulin production;GO:0006955//immune response
ENSMUSG00000076526	1	4	3	248	403	139	0.12	0.48	0.38	28.78	54.34	17.81	0.326666666666667	33.6433333333333	6.68635759410331	9.72175899859875e-24	1.87817356075338e-21	Igkv12-98	immunoglobulin kappa variable 12-98 [Source:MGI Symbol;Acc:MGI:4439560]	-	-	-	-	GO:0005615//extracellular space	-	GO:0002377//immunoglobulin production;GO:0006955//immune response
ENSMUSG00000076594	7	3	5	751	219	164	0.82	0.36	0.61	84.23	28.58	20.31	0.596666666666667	44.3733333333333	6.21662394087683	3.0750052504342e-23	5.86996537984671e-21	Igkv6-13	immunoglobulin kappa variable 6-13 [Source:MGI Symbol;Acc:MGI:1330829]	-	-	-	-	GO:0005615//extracellular space	-	GO:0002377//immunoglobulin production;GO:0006955//immune response
ENSMUSG00000076598	19	5	8	1238	3793	6568	2.23	0.58	0.98	138.85	494.35	813.52	1.26333333333333	482.24	8.57637216414789	4.38022045356422e-23	8.26315705563556e-21	Igkv3-7	immunoglobulin kappa variable 3-7 [Source:MGI Symbol;Acc:MGI:1330852]	-	-	-	-	GO:0005615//extracellular space	-	GO:0002377//immunoglobulin production;GO:0006955//immune response
ENSMUSG00000036896	320	173	205	997	1110	1162	11.26	6.03	7.51	33.49	43.23	43.02	8.26666666666667	39.9133333333333	2.27149314962856	7.47504337209447e-23	1.39374791245971e-20	C1qc	complement component 1, q subcomponent, C chain [Source:MGI Symbol;Acc:MGI:88225]	Human Diseases;Human Diseases;Human Diseases;Organismal Systems;Human Diseases;Human Diseases	Immune diseases;Infectious diseases;Infectious diseases;Immune system;Infectious diseases;Neurodegenerative diseases	ko05322//Systemic lupus erythematosus;ko05150//Staphylococcus aureus infection;ko05142//Chagas disease (American trypanosomiasis);ko04610//Complement and coagulation cascades;ko05133//Pertussis;ko05020//Prion diseases	K03988;K03988;K03988;K03988;K03988;K03988	GO:0005576//extracellular region;GO:0005581//collagen trimer;GO:0005615//extracellular space;GO:0005623//cell;GO:0045202//synapse;GO:0098794//postsynapse	GO:0005515//protein binding	GO:0002376//immune system process;GO:0006958//complement activation, classical pathway;GO:0030853//negative regulation of granulocyte differentiation;GO:0045087//innate immune response;GO:0045650//negative regulation of macrophage differentiation
ENSMUSG00000004110	154	195	170	556	607	497	0.76	1.04	0.97	2.24	2.96	2.25	0.923333333333333	2.48333333333333	1.42735444930033	7.72302716566753e-23	1.423433800017e-20	Cacna1e	calcium channel, voltage-dependent, R type, alpha 1E subunit [Source:MGI Symbol;Acc:MGI:106217]	Environmental Information Processing;Environmental Information Processing;Human Diseases	Signal transduction;Signal transduction;Endocrine and metabolic diseases	ko04020//Calcium signaling pathway;ko04010//MAPK signaling pathway;ko04930//Type II diabetes mellitus	K04852;K04852;K04852	GO:0005891//voltage-gated calcium channel complex;GO:0016020//membrane;GO:0016021//integral component of membrane	GO:0005216//ion channel activity;GO:0005244//voltage-gated ion channel activity;GO:0005245//voltage-gated calcium channel activity;GO:0005262//calcium channel activity;GO:0005509//calcium ion binding;GO:0022843//voltage-gated cation channel activity	GO:0006811//ion transport;GO:0006816//calcium ion transport;GO:0034765//regulation of ion transmembrane transport;GO:0055085//transmembrane transport;GO:0070588//calcium ion transmembrane transport
ENSMUSG00000069792	94	115	88	749	392	461	7.44	9.01	7.26	56.58	34.41	38.46	7.90333333333333	43.15	2.44882739730547	8.13236349930662e-23	1.48184600808388e-20	Wfdc17	WAP four-disulfide core domain 17 [Source:MGI Symbol;Acc:MGI:3649773]	-	-	-	-	GO:0005575//cellular_component;GO:0005576//extracellular region	GO:0004867//serine-type endopeptidase inhibitor activity;GO:0030414//peptidase inhibitor activity	GO:0008150//biological_process;GO:0010466//negative regulation of peptidase activity;GO:0010951//negative regulation of endopeptidase activity
ENSMUSG00000016283	8	9	2	180	421	181	0.26	0.29	0.07	5.49	15.01	6.11	0.206666666666667	8.87	5.42355648463534	9.92036073695949e-23	1.78733690356343e-20	H2-M2	histocompatibility 2, M region locus 2 [Source:MGI Symbol;Acc:MGI:95914]	Human Diseases;Human Diseases;Human Diseases;Cellular Processes;Cellular Processes;Human Diseases;Human Diseases;Human Diseases;Human Diseases;Human Diseases;Human Diseases;Human Diseases;Human Diseases;Cellular Processes;Environmental Information Processing;Organismal Systems;Human Diseases;Human Diseases	Infectious diseases;Infectious diseases;Infectious diseases;Transport and catabolism;Transport and catabolism;Infectious diseases;Infectious disease: viral;Infectious diseases;Cancers;Infectious diseases;Cardiovascular diseases;Immune diseases;Immune diseases;Cell growth and death;Signaling molecules and interaction;Immune system;Endocrine and metabolic diseases;Immune diseases	ko05168//Herpes simplex infection;ko05169//Epstein-Barr virus infection;ko05165//Human papillomavirus infection;ko04145//Phagosome;ko04144//Endocytosis;ko05163//Human cytomegalovirus infection;ko05170//Human immunodeficiency virus 1 infection;ko05166//HTLV-I infection;ko05203//Viral carcinogenesis;ko05167//Kaposi sarcoma-associated herpesvirus infection;ko05416//Viral myocarditis;ko05320//Autoimm…	K06751;K06751;K06751;K06751;K06751;K06751;K06751;K06751;K06751;K06751;K06751;K06751;K06751;K06751;K06751;K06751;K06751;K06751	GO:0005615//extracellular space;GO:0009897//external side of plasma membrane;GO:0009986//cell surface;GO:0016020//membrane;GO:0016021//integral component of membrane	-	GO:0001916//positive regulation of T cell mediated cytotoxicity;GO:0002476//antigen processing and presentation of endogenous peptide antigen via MHC class Ib
ENSMUSG00000021451	1009	962	937	1970	2208	2129	11.16	10.73	10.58	19.61	24.48	23.19	10.8233333333333	22.4266666666667	1.05107032096906	1.08182629996266e-22	1.92745385776681e-20	Sema4d	sema domain, immunoglobulin domain (Ig), transmembrane domain (TM) and short cytoplasmic domain, (semaphorin) 4D [Source:MGI Symbol;Acc:MGI:109244]	Organismal Systems	Development	ko04360//Axon guidance	K06521	GO:0005615//extracellular space;GO:0005886//plasma membrane;GO:0005887//integral component of plasma membrane;GO:0016020//membrane;GO:0016021//integral component of membrane	GO:0004888//transmembrane signaling receptor activity;GO:0005102//receptor binding;GO:0005515//protein binding;GO:0030215//semaphorin receptor binding;GO:0038023//signaling receptor activity;GO:0042802//identical protein binding;GO:0045499//chemorepellent activity	GO:0000122//negative regulation of transcription from RNA polymerase II promoter;GO:0001755//neural crest cell migration;GO:0001934//positive regulation of protein phosphorylation;GO:0007162//negative regulation of cell adhesion;GO:0007275//multicellular organism development;GO:0007399//nervous system development;GO:0008360//regulation of cell shape;GO:0010693//negative regulation of alkaline pho…
ENSMUSG00000001348	471	492	550	1647	2048	1414	14.38	15.00	17.62	48.06	69.64	45.87	15.6666666666667	54.5233333333333	1.79917550923735	1.28257366503267e-22	2.26000755151637e-20	Acp5	acid phosphatase 5, tartrate resistant [Source:MGI Symbol;Acc:MGI:87883]	Metabolism;Human Diseases;Cellular Processes;Organismal Systems;Metabolism	Global and overview maps;Immune diseases;Transport and catabolism;Development;Metabolism of cofactors and vitamins	ko01100//Metabolic pathways;ko05323//Rheumatoid arthritis;ko04142//Lysosome;ko04380//Osteoclast differentiation;ko00740//Riboflavin metabolism	K14379;K14379;K14379;K14379;K14379	GO:0005764//lysosome	GO:0003993//acid phosphatase activity;GO:0008198//ferrous iron binding;GO:0008199//ferric iron binding;GO:0016787//hydrolase activity;GO:0046872//metal ion binding	GO:0001503//ossification;GO:0016311//dephosphorylation;GO:0032496//response to lipopolysaccharide;GO:0032691//negative regulation of interleukin-1 beta production;GO:0032695//negative regulation of interleukin-12 production;GO:0032720//negative regulation of tumor necrosis factor production;GO:0032929//negative regulation of superoxide anion generation;GO:0034097//response to cytokine;GO:0045019/…
ENSMUSG00000058163	133	121	89	553	1379	1183	1.84	1.66	1.29	7.34	21.28	17.37	1.59666666666667	15.33	3.26322263664375	8.90424118577442e-22	1.53526352057949e-19	Gm5431	predicted gene 5431 [Source:MGI Symbol;Acc:MGI:3645205]	Environmental Information Processing	Signal transduction	ko04668//TNF signaling pathway	K17072	GO:0005789//endoplasmic reticulum membrane;GO:0016020//membrane	GO:0003924//GTPase activity;GO:0005525//GTP binding	GO:0006952//defense response;GO:0035458//cellular response to interferon-beta
ENSMUSG00000095007	2	2	1	235	126	301	0.25	0.24	0.13	27.29	16.99	38.62	0.206666666666667	27.6333333333333	7.06296007599623	1.15143198501357e-21	1.96417147656304e-19	Igkv12-41	immunoglobulin kappa chain variable 12-41 [Source:MGI Symbol;Acc:MGI:4439772]	-	-	-	-	GO:0005615//extracellular space;GO:0019814//immunoglobulin complex	-	GO:0002250//adaptive immune response;GO:0002376//immune system process;GO:0002377//immunoglobulin production;GO:0006955//immune response
ENSMUSG00000059149	29	42	28	216	178	168	0.50	0.65	0.49	3.32	3.27	2.85	0.546666666666667	3.14666666666667	2.52509104474376	1.30981921413634e-21	2.2108369577554e-19	Mfsd4a	major facilitator superfamily domain containing 4A [Source:MGI Symbol;Acc:MGI:2442786]	-	-	-	-	GO:0005575//cellular_component;GO:0016020//membrane;GO:0016021//integral component of membrane	GO:0005355//glucose transmembrane transporter activity	GO:0055085//transmembrane transport;GO:1904659//glucose transmembrane transport
ENSMUSG00000096594	8	11	10	142	336	168	0.95	1.24	1.19	15.45	42.49	20.19	1.12666666666667	26.0433333333333	4.53078146257009	2.83223038869925e-21	4.73070982112421e-19	Igkv8-19	immunoglobulin kappa variable 8-19 [Source:MGI Symbol;Acc:MGI:1330844]	-	-	-	-	GO:0005615//extracellular space	-	GO:0002377//immunoglobulin production;GO:0006955//immune response
ENSMUSG00000004730	790	832	811	1657	1397	1731	12.00	11.78	12.07	23.15	24.65	26.71	11.95	24.8366666666667	1.05546094399318	4.19176924305619e-21	6.92938348581505e-19	Adgre1	adhesion G protein-coupled receptor E1 [Source:MGI Symbol;Acc:MGI:106912]	-	-	-	-	GO:0005886//plasma membrane;GO:0005887//integral component of plasma membrane;GO:0009897//external side of plasma membrane;GO:0016020//membrane;GO:0016021//integral component of membrane;GO:0071944//cell periphery	GO:0004888//transmembrane signaling receptor activity;GO:0004930//G-protein coupled receptor activity;GO:0005509//calcium ion binding	GO:0002250//adaptive immune response;GO:0002376//immune system process;GO:0007165//signal transduction;GO:0007166//cell surface receptor signaling pathway;GO:0007186//G-protein coupled receptor signaling pathway;GO:0007189//adenylate cyclase-activating G-protein coupled receptor signaling pathway
ENSMUSG00000056529	211	307	292	1052	1312	896	2.45	3.53	3.53	11.65	16.88	10.95	3.17	13.16	2.05360474359583	4.98560161914474e-21	8.15756346561081e-19	Ptafr	platelet-activating factor receptor [Source:MGI Symbol;Acc:MGI:106066]	Environmental Information Processing;Environmental Information Processing;Human Diseases	Signaling molecules and interaction;Signal transduction;Infectious diseases	ko04080//Neuroactive ligand-receptor interaction;ko04020//Calcium signaling pathway;ko05150//Staphylococcus aureus infection	K04279;K04279;K04279	GO:0005886//plasma membrane;GO:0016020//membrane;GO:0016021//integral component of membrane	GO:0001530//lipopolysaccharide binding;GO:0001875//lipopolysaccharide receptor activity;GO:0004930//G-protein coupled receptor activity;GO:0004992//platelet activating factor receptor activity;GO:0005543//phospholipid binding;GO:0045028//G-protein coupled purinergic nucleotide receptor activity;GO:0051019//mitogen-activated protein kinase binding	GO:0001816//cytokine production;GO:0002693//positive regulation of cellular extravasation;GO:0006357//regulation of transcription from RNA polymerase II promoter;GO:0006935//chemotaxis;GO:0006954//inflammatory response;GO:0007165//signal transduction;GO:0007186//G-protein coupled receptor signaling pathway;GO:0007567//parturition;GO:0009609//response to symbiotic bacterium;GO:0010863//positive re…
ENSMUSG00000094134	1	2	5	119	190	360	0.12	0.23	0.61	13.27	24.63	44.34	0.32	27.4133333333333	6.42066204847272	6.32330691039582e-21	1.01394226308197e-18	Ighv5-15	immunoglobulin heavy variable 5-15 [Source:MGI Symbol;Acc:MGI:4439812]	Environmental Information Processing;Human Diseases;Human Diseases;Environmental Information Processing;Cellular Processes;Human Diseases;Human Diseases;Environmental Information Processing;Human Diseases;Human Diseases;Human Diseases;Environmental Information Processing;Organismal Systems;Human Diseases;Human Diseases;Organismal Systems;Organismal Systems;Human Diseases;Organismal Systems;Human …	Signal transduction;Infectious diseases;Infectious diseases;Signal transduction;Transport and catabolism;Cancers;Infectious diseases;Signal transduction;Immune diseases;Infectious diseases;Infectious diseases;Signal transduction;Immune system;Immune diseases;Cardiovascular diseases;Immune system;Immune system;Cardiovascular diseases;Immune system;Immune diseases;Infectious diseases;Immune system;…	ko04151//PI3K-Akt signaling pathway;ko05169//Epstein-Barr virus infection;ko05130//Pathogenic Escherichia coli infection;ko04020//Calcium signaling pathway;ko04145//Phagosome;ko05202//Transcriptional misregulation in cancers;ko05152//Tuberculosis;ko04072//Phospholipase D signaling pathway;ko05322//Systemic lupus erythematosus;ko05150//Staphylococcus aureus infection;ko05146//Amoebiasis;ko04064//N…	K06856;K06856;K06856;K06856;K06856;K06856;K06856;K06856;K06856;K06856;K06856;K06856;K06856;K06856;K06856;K06856;K06856;K06856;K06856;K06856;K06856;K06856;K06856;K06856;K06856;K06856;K06856	GO:0009897//external side of plasma membrane;GO:0042571//immunoglobulin complex, circulating	GO:0003823//antigen binding;GO:0034987//immunoglobulin receptor binding	GO:0006910//phagocytosis, recognition;GO:0006911//phagocytosis, engulfment;GO:0006958//complement activation, classical pathway;GO:0042742//defense response to bacterium;GO:0045087//innate immune response;GO:0050853//B cell receptor signaling pathway;GO:0050871//positive regulation of B cell activation
ENSMUSG00000095285	2	7	2	344	91	380	0.20	0.70	0.21	33.09	10.19	40.40	0.37	27.8933333333333	6.23625126989683	6.60620586715121e-21	1.04881694138386e-18	Ighv5-9	immunoglobulin heavy variable 5-9 [Source:MGI Symbol;Acc:MGI:4439873]	Environmental Information Processing;Human Diseases;Human Diseases;Environmental Information Processing;Cellular Processes;Human Diseases;Human Diseases;Environmental Information Processing;Human Diseases;Human Diseases;Human Diseases;Environmental Information Processing;Organismal Systems;Human Diseases;Human Diseases;Organismal Systems;Organismal Systems;Human Diseases;Organismal Systems;Human …	Signal transduction;Infectious diseases;Infectious diseases;Signal transduction;Transport and catabolism;Cancers;Infectious diseases;Signal transduction;Immune diseases;Infectious diseases;Infectious diseases;Signal transduction;Immune system;Immune diseases;Cardiovascular diseases;Immune system;Immune system;Cardiovascular diseases;Immune system;Immune diseases;Infectious diseases;Immune system;…	ko04151//PI3K-Akt signaling pathway;ko05169//Epstein-Barr virus infection;ko05130//Pathogenic Escherichia coli infection;ko04020//Calcium signaling pathway;ko04145//Phagosome;ko05202//Transcriptional misregulation in cancers;ko05152//Tuberculosis;ko04072//Phospholipase D signaling pathway;ko05322//Systemic lupus erythematosus;ko05150//Staphylococcus aureus infection;ko05146//Amoebiasis;ko04064//N…	K06856;K06856;K06856;K06856;K06856;K06856;K06856;K06856;K06856;K06856;K06856;K06856;K06856;K06856;K06856;K06856;K06856;K06856;K06856;K06856;K06856;K06856;K06856;K06856;K06856;K06856;K06856	GO:0009897//external side of plasma membrane;GO:0042571//immunoglobulin complex, circulating	GO:0003823//antigen binding;GO:0034987//immunoglobulin receptor binding	GO:0006910//phagocytosis, recognition;GO:0006911//phagocytosis, engulfment;GO:0006958//complement activation, classical pathway;GO:0042742//defense response to bacterium;GO:0045087//innate immune response;GO:0050853//B cell receptor signaling pathway;GO:0050871//positive regulation of B cell activation
ENSMUSG00000034652	251	295	238	754	851	668	2.28	2.66	2.45	6.54	9.02	7.24	2.46333333333333	7.6	1.62538755490596	8.78045922707075e-21	1.38033984025568e-18	Cd300a	CD300A molecule [Source:MGI Symbol;Acc:MGI:2443411]	-	-	-	-	GO:0005886//plasma membrane;GO:0016020//membrane;GO:0016021//integral component of membrane;GO:0042629//mast cell granule	GO:0001786//phosphatidylserine binding;GO:0005515//protein binding;GO:0008429//phosphatidylethanolamine binding;GO:0038023//signaling receptor activity	GO:0002376//immune system process;GO:0002552//serotonin secretion by mast cell;GO:0006898//receptor-mediated endocytosis;GO:0014063//negative regulation of serotonin secretion;GO:0030889//negative regulation of B cell proliferation;GO:0032516//positive regulation of phosphoprotein phosphatase activity;GO:0033007//negative regulation of mast cell activation involved in immune response;GO:0034125//…
ENSMUSG00000076937	92	172	122	564	775	648	6.58	11.88	8.85	38.19	61.19	49.72	9.10333333333333	49.7	2.44877903840552	8.96750197286608e-21	1.39605722461075e-18	Iglc2	immunoglobulin lambda constant 2 [Source:MGI Symbol;Acc:MGI:99547]	-	-	-	-	GO:0005886//plasma membrane;GO:0009897//external side of plasma membrane;GO:0042571//immunoglobulin complex, circulating	GO:0003823//antigen binding;GO:0034987//immunoglobulin receptor binding	GO:0006910//phagocytosis, recognition;GO:0006911//phagocytosis, engulfment;GO:0006958//complement activation, classical pathway;GO:0042742//defense response to bacterium;GO:0045087//innate immune response;GO:0050853//B cell receptor signaling pathway;GO:0050871//positive regulation of B cell activation
ENSMUSG00000042985	1682	1627	1897	699	398	539	20.10	19.26	23.62	7.97	5.28	6.79	20.9933333333333	6.68	-1.6520112489402	1.05471487460643e-20	1.6261877898379e-18	Upk3b	uroplakin 3B [Source:MGI Symbol;Acc:MGI:2140882]	-	-	-	-	GO:0016020//membrane;GO:0016021//integral component of membrane	-	GO:0010629//negative regulation of gene expression
ENSMUSG00000039146	46	52	35	250	628	626	1.41	1.58	1.12	7.32	21.36	20.23	1.37	16.3033333333333	3.5729191656561	1.24971304389933e-20	1.90849034846912e-18	Ifi44l	interferon-induced protein 44 like [Source:MGI Symbol;Acc:MGI:95975]	-	-	-	-	-	-	-
ENSMUSG00000043017	72	96	82	324	285	263	0.99	1.35	1.13	4.07	4.20	3.60	1.15666666666667	3.95666666666667	1.77431236706364	1.26540395674787e-20	1.91422192891057e-18	Ptgir	prostaglandin I receptor (IP) [Source:MGI Symbol;Acc:MGI:99535]	Environmental Information Processing;Organismal Systems;Organismal Systems	Signaling molecules and interaction;Circulatory system;Immune system	ko04080//Neuroactive ligand-receptor interaction;ko04270//Vascular smooth muscle contraction;ko04611//Platelet activation	K04263;K04263;K04263	GO:0005623//cell;GO:0005829//cytosol;GO:0005886//plasma membrane;GO:0016020//membrane;GO:0016021//integral component of membrane	GO:0004930//G-protein coupled receptor activity;GO:0016501//prostacyclin receptor activity	GO:0006954//inflammatory response;GO:0007165//signal transduction;GO:0007186//G-protein coupled receptor signaling pathway;GO:0007189//adenylate cyclase-activating G-protein coupled receptor signaling pathway;GO:0007204//positive regulation of cytosolic calcium ion concentration;GO:0010642//negative regulation of platelet-derived growth factor receptor signaling pathway;GO:0032496//response to li…
ENSMUSG00000033717	36	30	32	166	220	189	0.41	0.35	0.36	1.84	2.71	2.26	0.373333333333333	2.27	2.60415606595447	1.54545926396666e-20	2.31602236427153e-18	Adra2a	adrenergic receptor, alpha 2a [Source:MGI Symbol;Acc:MGI:87934]	Environmental Information Processing;Environmental Information Processing	Signaling molecules and interaction;Signal transduction	ko04080//Neuroactive ligand-receptor interaction;ko04022//cGMP - PKG signaling pathway	K04138;K04138	GO:0005737//cytoplasm;GO:0005886//plasma membrane;GO:0005887//integral component of plasma membrane;GO:0016020//membrane;GO:0016021//integral component of membrane;GO:0043025//neuronal cell body;GO:0043235//receptor complex;GO:0043679//axon terminus;GO:0045202//synapse	GO:0004930//G-protein coupled receptor activity;GO:0004935//adrenergic receptor activity;GO:0004938//alpha2-adrenergic receptor activity;GO:0005515//protein binding;GO:0019901//protein kinase binding;GO:0031696//alpha-2C adrenergic receptor binding;GO:0031996//thioesterase binding;GO:0032795//heterotrimeric G-protein binding;GO:0042802//identical protein binding;GO:0042803//protein homodimerizati…	GO:0001819//positive regulation of cytokine production;GO:0002526//acute inflammatory response;GO:0006260//DNA replication;GO:0006940//regulation of smooth muscle contraction;GO:0007165//signal transduction;GO:0007186//G-protein coupled receptor signaling pathway;GO:0007188//adenylate cyclase-modulating G-protein coupled receptor signaling pathway;GO:0007267//cell-cell signaling;GO:0007565//femal…
ENSMUSG00000055415	24	14	29	179	175	151	0.16	0.08	0.18	1.06	1.18	0.97	0.14	1.07	2.93411206434354	1.73040627685398e-20	2.56917265271793e-18	Atp10b	ATPase, class V, type 10B [Source:MGI Symbol;Acc:MGI:2442688]	-	-	-	-	GO:0005783//endoplasmic reticulum;GO:0005886//plasma membrane;GO:0016020//membrane;GO:0016021//integral component of membrane	GO:0000166//nucleotide binding;GO:0000287//magnesium ion binding;GO:0005524//ATP binding	GO:0015914//phospholipid transport;GO:0045332//phospholipid translocation
ENSMUSG00000032661	330	304	213	1028	1926	1841	2.95	2.69	2.09	8.77	19.87	17.74	2.57666666666667	15.46	2.58496250072115	1.92541191638131e-20	2.8324752366215e-18	Oas3	2'-5' oligoadenylate synthetase 3 [Source:MGI Symbol;Acc:MGI:2180850]	Human Diseases;Human Diseases;Organismal Systems;Human Diseases;Human Diseases;Human Diseases	Infectious diseases;Infectious diseases;Immune system;Infectious diseases;Infectious diseases;Infectious diseases	ko05168//Herpes simplex infection;ko05169//Epstein-Barr virus infection;ko04621//NOD-like receptor signaling pathway;ko05164//Influenza A;ko05160//Hepatitis C;ko05162//Measles	K14216;K14216;K14216;K14216;K14216;K14216	GO:0005634//nucleus;GO:0005654//nucleoplasm;GO:0005737//cytoplasm;GO:0005829//cytosol;GO:0005886//plasma membrane;GO:0016020//membrane	GO:0000166//nucleotide binding;GO:0001730//2'-5'-oligoadenylate synthetase activity;GO:0003723//RNA binding;GO:0003725//double-stranded RNA binding;GO:0005524//ATP binding;GO:0016740//transferase activity;GO:0016779//nucleotidyltransferase activity;GO:0046872//metal ion binding	GO:0002376//immune system process;GO:0006955//immune response;GO:0009615//response to virus;GO:0045071//negative regulation of viral genome replication;GO:0045087//innate immune response;GO:0051607//defense response to virus;GO:0060700//regulation of ribonuclease activity
ENSMUSG00000095771	24	6	5	1517	2187	902	2.71	0.74	0.65	166.02	278.10	108.96	1.36666666666667	184.36	7.07572045355236	1.97886871281933e-20	2.88465089182346e-18	Igkv14-111	immunoglobulin kappa variable 14-111 [Source:MGI Symbol;Acc:MGI:4439863]	-	-	-	-	GO:0005615//extracellular space	-	GO:0002377//immunoglobulin production;GO:0006955//immune response
ENSMUSG00000002588	1036	1424	1252	445	272	389	29.86	40.32	37.57	12.03	8.77	12.20	35.9166666666667	11	-1.70714993973065	2.11665018651854e-20	3.05770141809232e-18	Pon1	paraoxonase 1 [Source:MGI Symbol;Acc:MGI:103295]	-	-	-	-	GO:0005576//extracellular region;GO:0005615//extracellular space;GO:0034364//high-density lipoprotein particle;GO:0034366//spherical high-density lipoprotein particle;GO:0043231//intracellular membrane-bounded organelle	GO:0004063//aryldialkylphosphatase activity;GO:0004064//arylesterase activity;GO:0005509//calcium ion binding;GO:0005543//phospholipid binding;GO:0008035//high-density lipoprotein particle binding;GO:0016787//hydrolase activity;GO:0042803//protein homodimerization activity;GO:0046872//metal ion binding	GO:0006629//lipid metabolic process;GO:0008015//blood circulation;GO:0008203//cholesterol metabolic process;GO:0009636//response to toxic substance;GO:0010875//positive regulation of cholesterol efflux;GO:0016311//dephosphorylation;GO:0019439//aromatic compound catabolic process;GO:0031667//response to nutrient levels;GO:0032411//positive regulation of transporter activity;GO:0046395//carboxylic …
ENSMUSG00000059498	668	566	608	1601	1585	1275	21.01	17.61	19.89	48.01	55.23	42.21	19.5033333333333	48.4833333333333	1.3137681731684	2.41592121908254e-20	3.4588657810704e-18	Fcgr3	Fc receptor, IgG, low affinity III [Source:MGI Symbol;Acc:MGI:95500]	Cellular Processes;Human Diseases;Human Diseases;Human Diseases;Organismal Systems	Transport and catabolism;Infectious diseases;Infectious diseases;Infectious diseases;Development	ko04145//Phagosome;ko05152//Tuberculosis;ko05150//Staphylococcus aureus infection;ko05140//Leishmaniasis;ko04380//Osteoclast differentiation	K16824;K16824;K16824;K16824;K16824	GO:0016020//membrane;GO:0016021//integral component of membrane	-	-
ENSMUSG00000023913	236	158	170	880	770	575	5.98	4.05	4.04	18.20	19.16	13.66	4.69	17.0066666666667	1.85844057036594	3.00841034395108e-20	4.26901414736775e-18	Pla2g7	phospholipase A2, group VII (platelet-activating factor acetylhydrolase, plasma) [Source:MGI Symbol;Acc:MGI:1351327]	Metabolism;Metabolism	Global and overview maps;Lipid metabolism	ko01100//Metabolic pathways;ko00565//Ether lipid metabolism	K01062;K01062	GO:0005576//extracellular region;GO:0005615//extracellular space;GO:0005737//cytoplasm;GO:0034362//low-density lipoprotein particle	GO:0003847//1-alkyl-2-acetylglycerophosphocholine esterase activity;GO:0005543//phospholipid binding;GO:0016787//hydrolase activity;GO:0047499//calcium-independent phospholipase A2 activity	GO:0006629//lipid metabolic process;GO:0006954//inflammatory response;GO:0016042//lipid catabolic process;GO:0034374//low-density lipoprotein particle remodeling;GO:0034440//lipid oxidation;GO:0034441//plasma lipoprotein particle oxidation;GO:0046469//platelet activating factor metabolic process;GO:0090026//positive regulation of monocyte chemotaxis
ENSMUSG00000026535	55	41	66	290	685	589	1.37	1.01	1.72	6.89	18.88	15.42	1.36666666666667	13.73	3.32859831136281	5.07733495925884e-20	7.14167246243118e-18	Ifi202b	interferon activated gene 202B [Source:MGI Symbol;Acc:MGI:1347083]	Organismal Systems	Immune system	ko04623//Cytosolic DNA-sensing pathway	K12971	GO:0005634//nucleus;GO:0005730//nucleolus;GO:0005737//cytoplasm	GO:0003677//DNA binding;GO:0003690//double-stranded DNA binding;GO:0005515//protein binding	GO:0002218//activation of innate immune response;GO:0002376//immune system process;GO:0006954//inflammatory response;GO:0009617//response to bacterium;GO:0032731//positive regulation of interleukin-1 beta production;GO:0035458//cellular response to interferon-beta;GO:0043154//negative regulation of cysteine-type endopeptidase activity involved in apoptotic process;GO:0045087//innate immune respon…
ENSMUSG00000071713	1241	1304	1266	2838	2921	2359	12.94	12.67	15.62	26.75	31.98	26.86	13.7433333333333	28.53	1.05374778641481	5.41624445782157e-20	7.55212868531903e-18	Csf2rb	colony stimulating factor 2 receptor, beta, low-affinity (granulocyte-macrophage) [Source:MGI Symbol;Acc:MGI:1339759]	Human Diseases;Environmental Information Processing;Environmental Information Processing;Cellular Processes	Cancers;Signaling molecules and interaction;Signal transduction;Cell growth and death	ko05200//Pathways in cancer;ko04060//Cytokine-cytokine receptor interaction;ko04630//Jak-STAT signaling pathway;ko04210//Apoptosis	K04738;K04738;K04738;K04738	GO:0016020//membrane;GO:0016021//integral component of membrane	GO:0004896//cytokine receptor activity;GO:0005515//protein binding	GO:0001558//regulation of cell growth;GO:0019221//cytokine-mediated signaling pathway
ENSMUSG00000021190	2476	2443	2279	5136	5176	4248	52.49	51.79	50.38	104.54	121.99	95.16	51.5533333333333	107.23	1.05657097115746	5.47206380943394e-20	7.56418475726493e-18	Lgmn	legumain [Source:MGI Symbol;Acc:MGI:1330838]	Cellular Processes;Organismal Systems	Transport and catabolism;Immune system	ko04142//Lysosome;ko04612//Antigen processing and presentation	K01369;K01369	GO:0005576//extracellular region;GO:0005737//cytoplasm;GO:0005764//lysosome;GO:0005770//late endosome;GO:0045177//apical part of cell;GO:0048471//perinuclear region of cytoplasm	GO:0004197//cysteine-type endopeptidase activity;GO:0008233//peptidase activity;GO:0008234//cysteine-type peptidase activity;GO:0016787//hydrolase activity	GO:0003014//renal system process;GO:0006508//proteolysis;GO:0006624//vacuolar protein processing;GO:0007613//memory;GO:0008284//positive regulation of cell proliferation;GO:0008306//associative learning;GO:0010447//response to acidic pH;GO:0010629//negative regulation of gene expression;GO:0032801//receptor catabolic process;GO:0035729//cellular response to hepatocyte growth factor stimulus;GO:00…
ENSMUSG00000021423	125	156	114	400	455	413	4.65	5.75	4.42	14.20	18.77	16.19	4.94	16.3866666666667	1.72993946806683	7.89850700282233e-20	1.08250051102783e-17	Ly86	lymphocyte antigen 86 [Source:MGI Symbol;Acc:MGI:1321404]	-	-	-	-	GO:0005576//extracellular region;GO:0005615//extracellular space	GO:0005515//protein binding	GO:0002376//immune system process;GO:0006954//inflammatory response;GO:0006955//immune response;GO:0031666//positive regulation of lipopolysaccharide-mediated signaling pathway;GO:0045087//innate immune response
ENSMUSG00000076596	6	9	3	183	659	161	0.71	1.00	0.37	20.55	85.94	19.95	0.693333333333333	42.1466666666667	5.92572560176341	8.06964838699124e-20	1.09658315157122e-17	Igkv3-10	immunoglobulin kappa variable 3-10 [Source:MGI Symbol;Acc:MGI:1330821]	-	-	-	-	GO:0005615//extracellular space	-	GO:0002377//immunoglobulin production;GO:0006955//immune response
ENSMUSG00000036469	330	286	227	771	688	729	4.63	3.99	3.53	9.97	10.69	10.14	4.05	10.2666666666667	1.34197403708913	1.08644083355965e-19	1.46395619883436e-17	Marchf1	membrane associated ring-CH-type finger 1 [Source:MGI Symbol;Acc:MGI:1920175]	-	-	-	-	GO:0005737//cytoplasm;GO:0005764//lysosome;GO:0005765//lysosomal membrane;GO:0005768//endosome;GO:0005789//endoplasmic reticulum membrane;GO:0005794//Golgi apparatus;GO:0005886//plasma membrane;GO:0016020//membrane;GO:0016021//integral component of membrane;GO:0030659//cytoplasmic vesicle membrane;GO:0031410//cytoplasmic vesicle;GO:0031901//early endosome membrane;GO:0031902//late endosome membra…	GO:0004842//ubiquitin-protein transferase activity;GO:0008270//zinc ion binding;GO:0016740//transferase activity;GO:0042287//MHC protein binding;GO:0046872//metal ion binding;GO:0061630//ubiquitin protein ligase activity	GO:0000209//protein polyubiquitination;GO:0002376//immune system process;GO:0002495//antigen processing and presentation of peptide antigen via MHC class II;GO:0006955//immune response;GO:0016567//protein ubiquitination
ENSMUSG00000023903	62	83	63	301	218	284	0.59	0.80	0.62	2.75	2.27	2.80	0.67	2.60666666666667	1.95997310612843	1.46495195059769e-19	1.95754204398616e-17	Mmp25	matrix metallopeptidase 25 [Source:MGI Symbol;Acc:MGI:2443938]	Organismal Systems	Endocrine system	ko04928//Parathyroid hormone synthesis, secretion and action	K08003	GO:0005615//extracellular space;GO:0005886//plasma membrane;GO:0009986//cell surface;GO:0016020//membrane;GO:0016021//integral component of membrane;GO:0031012//extracellular matrix;GO:0031225//anchored component of membrane	GO:0004222//metalloendopeptidase activity;GO:0008233//peptidase activity;GO:0008237//metallopeptidase activity;GO:0008270//zinc ion binding;GO:0016504//peptidase activator activity;GO:0016787//hydrolase activity;GO:0046872//metal ion binding	GO:0006508//proteolysis;GO:0010952//positive regulation of peptidase activity;GO:0030198//extracellular matrix organization;GO:0030574//collagen catabolic process;GO:0060022//hard palate development
ENSMUSG00000000204	105	87	82	324	434	528	1.20	1.17	0.98	3.57	5.39	6.27	1.11666666666667	5.07666666666667	2.18468294114215	1.77058646229662e-19	2.33070130437915e-17	Slfn4	schlafen 4 [Source:MGI Symbol;Acc:MGI:1329010]	-	-	-	-	GO:0005575//cellular_component	GO:0003674//molecular_function	GO:0009617//response to bacterium
ENSMUSG00000095630	68	47	25	1948	742	2124	7.77	5.32	2.98	212.53	94.09	255.94	5.35666666666667	187.52	5.12956514146831	1.77328069307301e-19	2.33070130437915e-17	Igkv6-23	immunoglobulin kappa variable 6-23 [Source:MGI Symbol;Acc:MGI:3711980]	-	-	-	-	GO:0005615//extracellular space	-	GO:0002377//immunoglobulin production;GO:0006955//immune response
ENSMUSG00000022838	14	13	4	149	175	113	0.68	0.63	0.17	6.29	8.85	5.32	0.493333333333333	6.82	3.78913706411638	4.56745277007756e-19	5.95439879416209e-17	Eaf2	ELL associated factor 2 [Source:MGI Symbol;Acc:MGI:2146616]	-	-	-	-	GO:0005634//nucleus;GO:0005654//nucleoplasm;GO:0008023//transcription elongation factor complex;GO:0016607//nuclear speck;GO:0032783//ELL-EAF complex	GO:0000977//RNA polymerase II regulatory region sequence-specific DNA binding;GO:0001228//transcriptional activator activity, RNA polymerase II transcription regulatory region sequence-specific binding;GO:0005515//protein binding	GO:0006355//regulation of transcription, DNA-templated;GO:0030308//negative regulation of cell growth;GO:0045893//positive regulation of transcription, DNA-templated;GO:0045944//positive regulation of transcription from RNA polymerase II promoter;GO:0060770//negative regulation of epithelial cell proliferation involved in prostate gland development;GO:0097193//intrinsic apoptotic signaling pathway
ENSMUSG00000036594	4201	4112	3330	7600	8062	8381	209.92	204.77	172.48	364.10	446.12	442.13	195.723333333333	417.45	1.09278765098533	4.83052980254019e-19	6.24657624062355e-17	H2-Aa	histocompatibility 2, class II antigen A, alpha [Source:MGI Symbol;Acc:MGI:95895]	Human Diseases;Human Diseases;Cellular Processes;Human Diseases;Human Diseases;Human Diseases;Human Diseases;Human Diseases;Organismal Systems;Human Diseases;Human Diseases;Human Diseases;Human Diseases;Human Diseases;Environmental Information Processing;Organismal Systems;Human Diseases;Human Diseases;Organismal Systems;Organismal Systems;Organismal Systems;Human Diseases;Human Diseases;Human Di…	Infectious diseases;Infectious diseases;Transport and catabolism;Infectious diseases;Immune diseases;Infectious diseases;Infectious diseases;Immune diseases;Immune system;Cardiovascular diseases;Immune diseases;Infectious diseases;Infectious diseases;Immune diseases;Signaling molecules and interaction;Immune system;Immune diseases;Infectious diseases;Immune system;Immune system;Immune system;Endo…	ko05168//Herpes simplex infection;ko05169//Epstein-Barr virus infection;ko04145//Phagosome;ko05152//Tuberculosis;ko05322//Systemic lupus erythematosus;ko05150//Staphylococcus aureus infection;ko05166//HTLV-I infection;ko05323//Rheumatoid arthritis;ko04640//Hematopoietic cell lineage;ko05416//Viral myocarditis;ko05320//Autoimmune thyroid disease;ko05140//Leishmaniasis;ko05164//Influenza A;ko05330/…	K06752;K06752;K06752;K06752;K06752;K06752;K06752;K06752;K06752;K06752;K06752;K06752;K06752;K06752;K06752;K06752;K06752;K06752;K06752;K06752;K06752;K06752;K06752;K06752	GO:0005764//lysosome;GO:0005886//plasma membrane;GO:0009897//external side of plasma membrane;GO:0016020//membrane;GO:0016021//integral component of membrane;GO:0042613//MHC class II protein complex	GO:0005515//protein binding;GO:0042605//peptide antigen binding;GO:0044877//macromolecular complex binding	GO:0002250//adaptive immune response;GO:0002376//immune system process;GO:0002504//antigen processing and presentation of peptide or polysaccharide antigen via MHC class II;GO:0006955//immune response;GO:0019882//antigen processing and presentation;GO:0019886//antigen processing and presentation of exogenous peptide antigen via MHC class II;GO:0034341//response to interferon-gamma;GO:0042130//neg…
ENSMUSG00000000682	335	340	251	861	984	796	27.51	27.88	21.48	67.61	89.61	68.95	25.6233333333333	75.39	1.55691500419708	5.75673048850838e-19	7.38473387065855e-17	Cd52	CD52 antigen [Source:MGI Symbol;Acc:MGI:1346088]	-	-	-	-	GO:0005623//cell;GO:0005886//plasma membrane;GO:0016020//membrane;GO:0031225//anchored component of membrane;GO:0097225//sperm midpiece	-	GO:0007204//positive regulation of cytosolic calcium ion concentration;GO:0009617//response to bacterium
ENSMUSG00000021886	70	78	55	253	240	225	1.43	1.58	1.17	4.92	5.43	4.84	1.39333333333333	5.06333333333333	1.8615470224212	9.7507656268627e-19	1.24090100656146e-16	Gpr65	G-protein coupled receptor 65 [Source:MGI Symbol;Acc:MGI:108031]	-	-	-	-	GO:0005886//plasma membrane;GO:0016021//integral component of membrane	GO:0004930//G-protein coupled receptor activity	GO:0007165//signal transduction;GO:0007186//G-protein coupled receptor signaling pathway;GO:0007189//adenylate cyclase-activating G-protein coupled receptor signaling pathway;GO:0010447//response to acidic pH;GO:0031532//actin cytoskeleton reorganization;GO:0051496//positive regulation of stress fiber assembly;GO:0090630//activation of GTPase activity
ENSMUSG00000004952	147	138	118	407	505	403	2.15	2.24	1.90	5.79	8.82	6.25	2.09666666666667	6.95333333333333	1.72960723564047	1.07854632373944e-18	1.36177088985527e-16	Rasa4	RAS p21 protein activator 4 [Source:MGI Symbol;Acc:MGI:1858600]	Environmental Information Processing	Signal transduction	ko04014//Ras signaling pathway	K17630	GO:0005737//cytoplasm;GO:0005829//cytosol;GO:0005886//plasma membrane;GO:0016020//membrane	GO:0005096//GTPase activator activity;GO:0005543//phospholipid binding;GO:0046872//metal ion binding	GO:0007165//signal transduction;GO:0034260//negative regulation of GTPase activity;GO:0035556//intracellular signal transduction;GO:0043087//regulation of GTPase activity;GO:0043547//positive regulation of GTPase activity;GO:0046580//negative regulation of Ras protein signal transduction;GO:0071277//cellular response to calcium ion
ENSMUSG00000043832	241	257	153	812	750	647	8.12	8.45	5.27	25.60	27.65	22.75	7.28	25.3333333333333	1.79902656229846	1.23931505350178e-18	1.54379796525819e-16	Clec4a3	C-type lectin domain family 4, member a3 [Source:MGI Symbol;Acc:MGI:1920399]	-	-	-	-	GO:0005575//cellular_component;GO:0016020//membrane;GO:0016021//integral component of membrane	GO:0003674//molecular_function;GO:0004190//aspartic-type endopeptidase activity;GO:0030246//carbohydrate binding	GO:0006508//proteolysis;GO:0008150//biological_process
ENSMUSG00000020676	36	28	42	280	216	161	1.40	1.08	1.71	10.42	9.34	6.62	1.39666666666667	8.79333333333333	2.65442241555219	1.24197029945935e-18	1.54379796525819e-16	Ccl11	chemokine (C-C motif) ligand 11 [Source:MGI Symbol;Acc:MGI:103576]	Environmental Information Processing;Organismal Systems;Human Diseases;Organismal Systems;Environmental Information Processing	Signaling molecules and interaction;Immune system;Immune diseases;Immune system;Signaling molecules and interaction	ko04060//Cytokine-cytokine receptor interaction;ko04062//Chemokine signaling pathway;ko05310//Asthma;ko04657//IL-17 signaling pathway;ko04061//Viral protein interaction with cytokine and cytokine receptor	K16597;K16597;K16597;K16597;K16597	GO:0005576//extracellular region;GO:0005615//extracellular space	GO:0005125//cytokine activity;GO:0008009//chemokine activity;GO:0031728//CCR3 chemokine receptor binding;GO:0046983//protein dimerization activity;GO:0048018//receptor agonist activity;GO:0048020//CCR chemokine receptor binding	GO:0001938//positive regulation of endothelial cell proliferation;GO:0002544//chronic inflammatory response;GO:0002548//monocyte chemotaxis;GO:0002551//mast cell chemotaxis;GO:0006935//chemotaxis;GO:0006954//inflammatory response;GO:0006955//immune response;GO:0007010//cytoskeleton organization;GO:0007015//actin filament organization;GO:0007186//G-protein coupled receptor signaling pathway;GO:000…
ENSMUSG00000016756	556	612	500	1392	1216	1067	4.25	4.21	3.31	9.50	9.89	8.24	3.92333333333333	9.21	1.23112124177405	1.35673871223821e-18	1.67348501928767e-16	Cmah	cytidine monophospho-N-acetylneuraminic acid hydroxylase [Source:MGI Symbol;Acc:MGI:103227]	Metabolism	Carbohydrate metabolism	ko00520//Amino sugar and nucleotide sugar metabolism	K08080	GO:0005737//cytoplasm;GO:0005783//endoplasmic reticulum	GO:0016491//oxidoreductase activity;GO:0030338//CMP-N-acetylneuraminate monooxygenase activity;GO:0046872//metal ion binding;GO:0051536//iron-sulfur cluster binding;GO:0051537//2 iron, 2 sulfur cluster binding	GO:0006054//N-acetylneuraminate metabolic process;GO:0046381//CMP-N-acetylneuraminate metabolic process;GO:0055114//oxidation-reduction process
ENSMUSG00000031910	47	48	43	176	207	232	0.44	0.37	0.37	1.37	1.89	2.06	0.393333333333333	1.77333333333333	2.17263938613935	1.6618026324573e-18	2.0341225352254e-16	Has3	hyaluronan synthase 3 [Source:MGI Symbol;Acc:MGI:109599]	-	-	-	-	GO:0005634//nucleus;GO:0005737//cytoplasm;GO:0005887//integral component of plasma membrane;GO:0016020//membrane;GO:0016021//integral component of membrane;GO:0036117//hyaluranon cable	GO:0016740//transferase activity;GO:0016757//transferase activity, transferring glycosyl groups;GO:0042802//identical protein binding;GO:0050501//hyaluronan synthase activity	GO:0030213//hyaluronan biosynthetic process;GO:0045226//extracellular polysaccharide biosynthetic process;GO:0045893//positive regulation of transcription, DNA-templated;GO:0085029//extracellular matrix assembly;GO:1900106//positive regulation of hyaluranon cable assembly
ENSMUSG00000027199	442	282	292	1108	1432	1166	7.96	5.08	5.37	18.67	28.22	22.33	6.13666666666667	23.0733333333333	1.91069931481554	1.68997135311992e-18	2.05293110964226e-16	Gatm	glycine amidinotransferase (L-arginine:glycine amidinotransferase) [Source:MGI Symbol;Acc:MGI:1914342]	Metabolism;Metabolism;Metabolism	Global and overview maps;Amino acid metabolism;Amino acid metabolism	ko01100//Metabolic pathways;ko00330//Arginine and proline metabolism;ko00260//Glycine, serine and threonine metabolism	K00613;K00613;K00613	GO:0005739//mitochondrion;GO:0005743//mitochondrial inner membrane;GO:0005758//mitochondrial intermembrane space;GO:0016020//membrane	GO:0015067//amidinotransferase activity;GO:0015068//glycine amidinotransferase activity;GO:0016740//transferase activity	GO:0006600//creatine metabolic process;GO:0006601//creatine biosynthetic process;GO:0007275//multicellular organism development;GO:0007584//response to nutrient;GO:0007611//learning or memory;GO:0010033//response to organic substance;GO:0014889//muscle atrophy;GO:0043434//response to peptide hormone;GO:0046689//response to mercury ion
ENSMUSG00000079419	368	340	223	1005	921	1239	8.43	7.72	5.33	21.98	23.41	29.92	7.16	25.1033333333333	1.80984745181994	1.83911956488182e-18	2.21731445284812e-16	Ms4a6c	membrane-spanning 4-domains, subfamily A, member 6C [Source:MGI Symbol;Acc:MGI:2385644]	-	-	-	-	GO:0016020//membrane;GO:0016021//integral component of membrane	-	-
ENSMUSG00000005364	12	12	16	135	95	108	0.22	0.27	0.26	1.96	1.97	2.03	0.25	1.98666666666667	2.99034982996628	2.26664373920383e-18	2.69226906356544e-16	Il5ra	interleukin 5 receptor, alpha [Source:MGI Symbol;Acc:MGI:96558]	Human Diseases;Environmental Information Processing;Organismal Systems;Environmental Information Processing	Cancers;Signaling molecules and interaction;Immune system;Signal transduction	ko05200//Pathways in cancer;ko04060//Cytokine-cytokine receptor interaction;ko04640//Hematopoietic cell lineage;ko04630//Jak-STAT signaling pathway	K05067;K05067;K05067;K05067	GO:0009897//external side of plasma membrane;GO:0016020//membrane;GO:0016021//integral component of membrane;GO:0043235//receptor complex	GO:0004896//cytokine receptor activity;GO:0005515//protein binding;GO:0019955//cytokine binding	GO:0002437//inflammatory response to antigenic stimulus;GO:0019221//cytokine-mediated signaling pathway;GO:0032674//regulation of interleukin-5 production;GO:0071310//cellular response to organic substance
ENSMUSG00000096490	11	15	12	5882	2894	511	1.34	1.82	1.56	682.51	390.19	65.43	1.57333333333333	379.376666666667	7.91366278029739	2.30691115027879e-18	2.71995002167061e-16	Igkv10-94	immunoglobulin kappa variable 10-94 [Source:MGI Symbol;Acc:MGI:3646140]	-	-	-	-	GO:0005615//extracellular space	-	GO:0002377//immunoglobulin production;GO:0006955//immune response
ENSMUSG00000052271	68	46	73	328	383	252	0.82	0.55	0.92	3.78	5.13	3.21	0.763333333333333	4.04	2.40397019537601	2.77152816542114e-18	3.2439017614984e-16	Bhlha15	basic helix-loop-helix family, member a15 [Source:MGI Symbol;Acc:MGI:891976]	Human Diseases	Endocrine and metabolic diseases	ko04950//Maturity onset diabetes of the young	K08040	GO:0005634//nucleus	GO:0000977//RNA polymerase II regulatory region sequence-specific DNA binding;GO:0001228//transcriptional activator activity, RNA polymerase II transcription regulatory region sequence-specific binding;GO:0003677//DNA binding;GO:0042802//identical protein binding;GO:0046983//protein dimerization activity	GO:0006355//regulation of transcription, DNA-templated;GO:0006851//mitochondrial calcium ion transport;GO:0007030//Golgi organization;GO:0007186//G-protein coupled receptor signaling pathway;GO:0007267//cell-cell signaling;GO:0010832//negative regulation of myotube differentiation;GO:0019722//calcium-mediated signaling;GO:0030968//endoplasmic reticulum unfolded protein response;GO:0042149//cellul…
ENSMUSG00000041827	82	107	85	358	814	747	1.64	2.05	1.71	6.61	17.46	15.61	1.8	13.2266666666667	2.87738071333605	3.56722386253346e-18	4.1449590315742e-16	Oasl1	2'-5' oligoadenylate synthetase-like 1 [Source:MGI Symbol;Acc:MGI:2180849]	Human Diseases	Infectious diseases	ko05165//Human papillomavirus infection	K14608	GO:0005634//nucleus;GO:0005654//nucleoplasm;GO:0005730//nucleolus;GO:0005737//cytoplasm;GO:0005829//cytosol;GO:0016020//membrane	GO:0003677//DNA binding;GO:0003723//RNA binding;GO:0003725//double-stranded RNA binding;GO:0005515//protein binding;GO:0005524//ATP binding;GO:0016740//transferase activity	GO:0002376//immune system process;GO:0006955//immune response;GO:0009615//response to virus;GO:0045071//negative regulation of viral genome replication;GO:0045087//innate immune response;GO:0051607//defense response to virus;GO:0060700//regulation of ribonuclease activity
ENSMUSG00000038147	1042	1061	934	2578	3039	2156	19.34	22.61	19.13	52.56	66.09	47.11	20.36	55.2533333333333	1.4403239408897	4.13686612480678e-18	4.73818916509119e-16	Cd84	CD84 antigen [Source:MGI Symbol;Acc:MGI:1336885]	-	-	-	-	GO:0005886//plasma membrane;GO:0016020//membrane;GO:0016021//integral component of membrane;GO:0043231//intracellular membrane-bounded organelle	GO:0042802//identical protein binding	GO:0032685//negative regulation of granulocyte macrophage colony-stimulating factor production;GO:0032701//negative regulation of interleukin-18 production;GO:0033004//negative regulation of mast cell activation;GO:0043305//negative regulation of mast cell degranulation;GO:2001256//regulation of store-operated calcium entry
ENSMUSG00000000290	3801	4166	3713	8530	9460	7288	54.72	59.84	56.97	118.29	150.23	110.40	57.1766666666667	126.306666666667	1.14343236878688	5.60317239210942e-18	6.37211839060103e-16	Itgb2	integrin beta 2 [Source:MGI Symbol;Acc:MGI:96611]	Cellular Processes;Human Diseases;Human Diseases;Human Diseases;Human Diseases;Organismal Systems;Environmental Information Processing;Human Diseases;Cellular Processes;Human Diseases;Human Diseases;Environmental Information Processing;Environmental Information Processing;Organismal Systems;Organismal Systems;Human Diseases;Human Diseases;Human Diseases	Transport and catabolism;Infectious diseases;Infectious diseases;Infectious diseases;Infectious diseases;Immune system;Signal transduction;Immune diseases;Cell motility;Cardiovascular diseases;Infectious diseases;Signaling molecules and interaction;Signal transduction;Immune system;Immune system;Infectious diseases;Infectious diseases;Infectious diseases	ko04145//Phagosome;ko05152//Tuberculosis;ko05150//Staphylococcus aureus infection;ko05166//HTLV-I infection;ko05146//Amoebiasis;ko04650//Natural killer cell mediated cytotoxicity;ko04015//Rap1 signaling pathway;ko05323//Rheumatoid arthritis;ko04810//Regulation of actin cytoskeleton;ko05416//Viral myocarditis;ko05140//Leishmaniasis;ko04514//Cell adhesion molecules (CAMs);ko04390//Hippo signaling p…	K06464;K06464;K06464;K06464;K06464;K06464;K06464;K06464;K06464;K06464;K06464;K06464;K06464;K06464;K06464;K06464;K06464;K06464	GO:0005886//plasma membrane;GO:0008305//integrin complex;GO:0009986//cell surface;GO:0016020//membrane;GO:0016021//integral component of membrane	GO:0038023//signaling receptor activity;GO:0044877//macromolecular complex binding;GO:0050839//cell adhesion molecule binding	GO:0002523//leukocyte migration involved in inflammatory response;GO:0007155//cell adhesion;GO:0007159//leukocyte cell-cell adhesion;GO:0007160//cell-matrix adhesion;GO:0007229//integrin-mediated signaling pathway;GO:0007568//aging;GO:0030101//natural killer cell activation;GO:0043542//endothelial cell migration;GO:0045123//cellular extravasation;GO:0045429//positive regulation of nitric oxide bi…
ENSMUSG00000025044	171	138	124	482	528	399	3.51	2.68	2.47	8.62	11.37	7.80	2.88666666666667	9.26333333333333	1.68212690447383	7.2368275367104e-18	8.17200912332051e-16	Msr1	macrophage scavenger receptor 1 [Source:MGI Symbol;Acc:MGI:98257]	Cellular Processes	Transport and catabolism	ko04145//Phagosome	K06558	GO:0005581//collagen trimer;GO:0005829//cytosol;GO:0005886//plasma membrane;GO:0016020//membrane;GO:0016021//integral component of membrane;GO:0031410//cytoplasmic vesicle;GO:0034362//low-density lipoprotein particle	GO:0001540//beta-amyloid binding;GO:0005044//scavenger receptor activity;GO:0030169//low-density lipoprotein particle binding;GO:0038024//cargo receptor activity	GO:0006897//endocytosis;GO:0006898//receptor-mediated endocytosis;GO:0006911//phagocytosis, engulfment;GO:0010629//negative regulation of gene expression;GO:0010744//positive regulation of macrophage derived foam cell differentiation;GO:0010886//positive regulation of cholesterol storage;GO:0030301//cholesterol transport;GO:0034381//plasma lipoprotein particle clearance;GO:0042953//lipoprotein tr…
ENSMUSG00000030148	96	86	92	362	237	324	3.50	3.03	3.93	12.76	10.24	13.64	3.48666666666667	12.2133333333333	1.80853665185	7.68964172249321e-18	8.62261573567683e-16	Clec4a2	C-type lectin domain family 4, member a2 [Source:MGI Symbol;Acc:MGI:1349412]	-	-	-	-	GO:0005886//plasma membrane;GO:0016020//membrane;GO:0016021//integral component of membrane	GO:0005509//calcium ion binding;GO:0005537//mannose binding;GO:0030246//carbohydrate binding;GO:0046872//metal ion binding	GO:0001818//negative regulation of cytokine production;GO:0002250//adaptive immune response;GO:0002376//immune system process;GO:0002470//plasmacytoid dendritic cell antigen processing and presentation;GO:0032720//negative regulation of tumor necrosis factor production;GO:0036037//CD8-positive, alpha-beta T cell activation;GO:0042590//antigen processing and presentation of exogenous peptide antig…
ENSMUSG00000049608	42	50	55	193	206	185	0.48	0.56	0.65	2.09	2.59	2.21	0.563333333333333	2.29666666666667	2.02748073642211	1.26469655013857e-17	1.40829230426889e-15	Gpr55	G protein-coupled receptor 55 [Source:MGI Symbol;Acc:MGI:2685064]	-	-	-	-	GO:0005623//cell;GO:0005886//plasma membrane;GO:0005887//integral component of plasma membrane;GO:0016020//membrane;GO:0016021//integral component of membrane	GO:0004930//G-protein coupled receptor activity;GO:0004949//cannabinoid receptor activity	GO:0007165//signal transduction;GO:0007186//G-protein coupled receptor signaling pathway;GO:0007202//activation of phospholipase C activity;GO:0035025//positive regulation of Rho protein signal transduction;GO:0038171//cannabinoid signaling pathway;GO:0045453//bone resorption;GO:0045671//negative regulation of osteoclast differentiation;GO:0051482//positive regulation of cytosolic calcium ion con…
ENSMUSG00000026494	1084	1242	1199	554	515	614	3.50	4.21	4.42	1.65	1.99	2.33	4.04333333333333	1.99	-1.0227767138557	1.59456782937528e-17	1.72762805027248e-15	Kif26b	kinesin family member 26B [Source:MGI Symbol;Acc:MGI:2447076]	-	-	-	-	GO:0005737//cytoplasm;GO:0005856//cytoskeleton;GO:0005871//kinesin complex;GO:0005874//microtubule	GO:0000166//nucleotide binding;GO:0003774//motor activity;GO:0003777//microtubule motor activity;GO:0005515//protein binding;GO:0005524//ATP binding;GO:0008017//microtubule binding;GO:0008574//ATP-dependent microtubule motor activity, plus-end-directed	GO:0007018//microtubule-based movement;GO:0007275//multicellular organism development;GO:0022409//positive regulation of cell-cell adhesion;GO:0030010//establishment of cell polarity;GO:0072092//ureteric bud invasion
ENSMUSG00000019987	23	35	28	304	545	178	0.66	0.99	0.83	8.29	17.27	5.36	0.826666666666667	10.3066666666667	3.64012829353798	2.52610737637989e-17	2.71853233424507e-15	Arg1	arginase, liver [Source:MGI Symbol;Acc:MGI:88070]	Metabolism;Human Diseases;Metabolism;Metabolism;Metabolism	Global and overview maps;Infectious diseases;Global and overview maps;Amino acid metabolism;Amino acid metabolism	ko01100//Metabolic pathways;ko05146//Amoebiasis;ko01230//Biosynthesis of amino acids;ko00330//Arginine and proline metabolism;ko00220//Arginine biosynthesis	K01476;K01476;K01476;K01476;K01476	GO:0005615//extracellular space;GO:0005737//cytoplasm;GO:0005741//mitochondrial outer membrane;GO:0005829//cytosol;GO:0043005//neuron projection;GO:0043025//neuronal cell body	GO:0004053//arginase activity;GO:0016787//hydrolase activity;GO:0016813//hydrolase activity, acting on carbon-nitrogen (but not peptide) bonds, in linear amidines;GO:0030145//manganese ion binding;GO:0042802//identical protein binding;GO:0046872//metal ion binding	GO:0000050//urea cycle;GO:0001889//liver development;GO:0001938//positive regulation of endothelial cell proliferation;GO:0002250//adaptive immune response;GO:0002376//immune system process;GO:0006525//arginine metabolic process;GO:0007565//female pregnancy;GO:0007568//aging;GO:0009611//response to wounding;GO:0009635//response to herbicide;GO:0010042//response to manganese ion;GO:0010043//respon…
ENSMUSG00000076577	17	17	19	1180	1024	259	1.95	1.93	2.27	129.11	130.20	31.29	2.05	96.8666666666667	5.5623044822936	3.02243780775096e-17	3.23098601648577e-15	Igkv8-30	immunoglobulin kappa chain variable 8-30 [Source:MGI Symbol;Acc:MGI:3642250]	-	-	-	-	GO:0005615//extracellular space	-	GO:0002377//immunoglobulin production;GO:0006955//immune response
ENSMUSG00000078763	254	248	189	582	704	651	5.75	5.56	4.46	12.57	17.67	15.53	5.25666666666667	15.2566666666667	1.53721963181015	3.22481914013204e-17	3.42450164980247e-15	Slfn1	schlafen 1 [Source:MGI Symbol;Acc:MGI:1313259]	-	-	-	-	GO:0005634//nucleus;GO:0005737//cytoplasm	GO:0005515//protein binding	GO:0000122//negative regulation of transcription from RNA polymerase II promoter;GO:0001933//negative regulation of protein phosphorylation;GO:0007050//cell cycle arrest;GO:0008285//negative regulation of cell proliferation;GO:0042130//negative regulation of T cell proliferation;GO:1900477//negative regulation of G1/S transition of mitotic cell cycle by negative regulation of transcription from R…
ENSMUSG00000026417	2905	2436	4495	11596	12246	10976	40.37	31.45	68.74	155.14	196.19	169.74	46.8533333333333	173.69	1.89029109921032	3.69147674684047e-17	3.8942651076044e-15	Pigr	polymeric immunoglobulin receptor [Source:MGI Symbol;Acc:MGI:103080]	Organismal Systems	Immune system	ko04672//Intestinal immune network for IgA production	K13073	GO:0005576//extracellular region;GO:0005615//extracellular space;GO:0005886//plasma membrane;GO:0016020//membrane;GO:0016021//integral component of membrane;GO:0030133//transport vesicle;GO:0043235//receptor complex;GO:0055038//recycling endosome membrane	GO:0001792//polymeric immunoglobulin receptor activity;GO:0005154//epidermal growth factor receptor binding	GO:0001580//detection of chemical stimulus involved in sensory perception of bitter taste;GO:0002415//immunoglobulin transcytosis in epithelial cells mediated by polymeric immunoglobulin receptor;GO:0007173//epidermal growth factor receptor signaling pathway;GO:0038093//Fc receptor signaling pathway;GO:0043113//receptor clustering
ENSMUSG00000048779	184	136	115	451	466	449	4.28	3.03	2.79	9.72	11.67	10.52	3.36666666666667	10.6366666666667	1.65965331564016	4.21431865903257e-17	4.41677122206453e-15	P2ry6	pyrimidinergic receptor P2Y, G-protein coupled, 6 [Source:MGI Symbol;Acc:MGI:2673874]	Environmental Information Processing	Signaling molecules and interaction	ko04080//Neuroactive ligand-receptor interaction	K04272	GO:0005623//cell;GO:0005886//plasma membrane;GO:0016020//membrane;GO:0016021//integral component of membrane;GO:0016323//basolateral plasma membrane;GO:0016324//apical plasma membrane	GO:0001621//ADP receptor activity;GO:0004930//G-protein coupled receptor activity;GO:0019103//pyrimidine nucleotide binding;GO:0045028//G-protein coupled purinergic nucleotide receptor activity;GO:0045029//UDP-activated nucleotide receptor activity;GO:0045030//UTP-activated nucleotide receptor activity	GO:0006909//phagocytosis;GO:0007165//signal transduction;GO:0007186//G-protein coupled receptor signaling pathway;GO:0014911//positive regulation of smooth muscle cell migration;GO:0030321//transepithelial chloride transport;GO:0031587//positive regulation of inositol 1,4,5-trisphosphate-sensitive calcium-release channel activity;GO:0032962//positive regulation of inositol trisphosphate biosynthe…
ENSMUSG00000034687	1067	964	1168	546	450	490	3.18	2.54	3.24	1.39	1.33	1.37	2.98666666666667	1.36333333333333	-1.13139788911586	4.58148213280877e-17	4.77039389607719e-15	Fras1	Fraser extracellular matrix complex subunit 1 [Source:MGI Symbol;Acc:MGI:2385368]	Environmental Information Processing	Signaling molecules and interaction	ko04512//ECM-receptor interaction	K23379	GO:0005604//basement membrane;GO:0005886//plasma membrane;GO:0016020//membrane;GO:0016021//integral component of membrane	GO:0005201//extracellular matrix structural constituent;GO:0005515//protein binding;GO:0046872//metal ion binding	GO:0002009//morphogenesis of an epithelium;GO:0003338//metanephros morphogenesis;GO:0007154//cell communication;GO:0015031//protein transport;GO:0030326//embryonic limb morphogenesis;GO:0043588//skin development;GO:0060021//palate development
ENSMUSG00000032053	507	536	321	1875	1944	1260	8.50	8.88	5.54	29.63	35.70	21.99	7.64	29.1066666666667	1.92970508623389	5.01245076480928e-17	5.15222102652031e-15	Pou2af1	POU domain, class 2, associating factor 1 [Source:MGI Symbol;Acc:MGI:105086]	-	-	-	-	GO:0005634//nucleus;GO:0090575//RNA polymerase II transcription factor complex	GO:0000978//RNA polymerase II core promoter proximal region sequence-specific DNA binding;GO:0000979//RNA polymerase II core promoter sequence-specific DNA binding;GO:0003677//DNA binding;GO:0003713//transcription coactivator activity;GO:0005515//protein binding	GO:0045944//positive regulation of transcription from RNA polymerase II promoter
ENSMUSG00000095351	12	5	8	125	343	132	1.34	0.55	0.93	13.32	42.46	15.53	0.94	23.77	4.6603373362648	6.22929945143023e-17	6.36221762443846e-15	Igkv3-2	immunoglobulin kappa variable 3-2 [Source:MGI Symbol;Acc:MGI:1330850]	-	-	-	-	GO:0005615//extracellular space	-	GO:0002377//immunoglobulin production;GO:0006955//immune response
ENSMUSG00000026536	18	20	13	104	154	166	0.44	0.46	0.32	2.35	4.03	4.13	0.406666666666667	3.50333333333333	3.10680961639929	6.66939015852907e-17	6.76858678430466e-15	Ifi211	interferon activated gene 211 [Source:MGI Symbol;Acc:MGI:3041120]	Organismal Systems	Immune system	ko04621//NOD-like receptor signaling pathway	K20914	GO:0005634//nucleus;GO:0005654//nucleoplasm;GO:0005730//nucleolus;GO:0005829//cytosol;GO:0016607//nuclear speck;GO:0034399//nuclear periphery	GO:0000978//RNA polymerase II core promoter proximal region sequence-specific DNA binding;GO:0001227//transcriptional repressor activity, RNA polymerase II transcription regulatory region sequence-specific binding;GO:0003690//double-stranded DNA binding;GO:0008134//transcription factor binding;GO:0042802//identical protein binding	GO:0000122//negative regulation of transcription from RNA polymerase II promoter;GO:0002218//activation of innate immune response;GO:0009617//response to bacterium;GO:0032731//positive regulation of interleukin-1 beta production;GO:0035458//cellular response to interferon-beta
ENSMUSG00000027514	176	110	106	512	1282	1252	4.67	3.08	3.48	13.81	40.19	38.88	3.74333333333333	30.96	3.04801004446497	6.83064530565735e-17	6.88864135070538e-15	Zbp1	Z-DNA binding protein 1 [Source:MGI Symbol;Acc:MGI:1927449]	Cellular Processes;Organismal Systems	Cell growth and death;Immune system	ko04217//Necroptosis;ko04623//Cytosolic DNA-sensing pathway	K12965;K12965	GO:0005634//nucleus;GO:0005737//cytoplasm;GO:0005829//cytosol	GO:0003677//DNA binding;GO:0003692//left-handed Z-DNA binding;GO:0005515//protein binding;GO:0042802//identical protein binding	GO:0002376//immune system process;GO:0016032//viral process;GO:0045087//innate immune response;GO:0051607//defense response to virus;GO:0060340//positive regulation of type I interferon-mediated signaling pathway
ENSMUSG00000022496	8	6	9	88	99	82	0.41	0.31	0.49	4.35	5.68	4.47	0.403333333333333	4.83333333333333	3.5829739476277	8.30144715628739e-17	8.31960657194177e-15	Tnfrsf17	tumor necrosis factor receptor superfamily, member 17 [Source:MGI Symbol;Acc:MGI:1343050]	Environmental Information Processing;Organismal Systems	Signaling molecules and interaction;Immune system	ko04060//Cytokine-cytokine receptor interaction;ko04672//Intestinal immune network for IgA production	K05153;K05153	GO:0016020//membrane;GO:0016021//integral component of membrane	GO:0038023//signaling receptor activity	GO:0002250//adaptive immune response;GO:0002260//lymphocyte homeostasis;GO:0002376//immune system process;GO:0007165//signal transduction
ENSMUSG00000023272	600	525	476	1277	1292	1052	18.53	16.06	15.32	37.64	44.26	34.24	16.6366666666667	38.7133333333333	1.21846413020119	1.09683085849863e-16	1.085659433088e-14	Creld2	cysteine-rich with EGF-like domains 2 [Source:MGI Symbol;Acc:MGI:1923987]	-	-	-	-	GO:0005615//extracellular space;GO:0005783//endoplasmic reticulum;GO:0005794//Golgi apparatus	GO:0003756//protein disulfide isomerase activity;GO:0005201//extracellular matrix structural constituent;GO:0005509//calcium ion binding;GO:0016853//isomerase activity	GO:0008150//biological_process
ENSMUSG00000015950	798	995	755	2118	2060	1678	12.35	15.26	12.17	31.28	35.49	27.40	13.26	31.39	1.24322425346953	1.20759223633902e-16	1.18795960182185e-14	Ncf1	neutrophil cytosolic factor 1 [Source:MGI Symbol;Acc:MGI:97283]	Cellular Processes;Organismal Systems;Human Diseases;Organismal Systems;Human Diseases;Organismal Systems;Organismal Systems	Transport and catabolism;Immune system;Infectious diseases;Immune system;Cardiovascular diseases;Development;Immune system	ko04145//Phagosome;ko04666//Fc gamma R-mediated phagocytosis;ko05140//Leishmaniasis;ko04062//Chemokine signaling pathway;ko05418//Fluid shear stress and atherosclerosis;ko04380//Osteoclast differentiation;ko04670//Leukocyte transendothelial migration	K08011;K08011;K08011;K08011;K08011;K08011;K08011	GO:0005737//cytoplasm;GO:0005791//rough endoplasmic reticulum;GO:0005794//Golgi apparatus;GO:0005829//cytosol;GO:0005886//plasma membrane;GO:0016020//membrane;GO:0019898//extrinsic component of membrane;GO:0030425//dendrite;GO:0043020//NADPH oxidase complex;GO:0043025//neuronal cell body	GO:0005515//protein binding;GO:0008289//lipid binding;GO:0016175//superoxide-generating NADPH oxidase activity;GO:0016176//superoxide-generating NADPH oxidase activator activity;GO:0017124//SH3 domain binding;GO:0035091//phosphatidylinositol binding;GO:0043325//phosphatidylinositol-3,4-bisphosphate binding	GO:0001878//response to yeast;GO:0001909//leukocyte mediated cytotoxicity;GO:0002679//respiratory burst involved in defense response;GO:0006612//protein targeting to membrane;GO:0006691//leukotriene metabolic process;GO:0006742//NADP catabolic process;GO:0006801//superoxide metabolic process;GO:0006915//apoptotic process;GO:0006954//inflammatory response;GO:0006968//cellular defense response;GO:0…
ENSMUSG00000027322	426	297	260	1038	1729	2126	2.82	1.94	1.90	6.62	13.24	14.94	2.22	11.6	2.38549322366483	1.78525561153682e-16	1.74552278847518e-14	Siglec1	sialic acid binding Ig-like lectin 1, sialoadhesin [Source:MGI Symbol;Acc:MGI:99668]	Environmental Information Processing	Signaling molecules and interaction	ko04514//Cell adhesion molecules (CAMs)	K06548	GO:0016020//membrane;GO:0016021//integral component of membrane	-	-
ENSMUSG00000020053	348	220	246	836	1129	894	3.06	2.04	2.29	6.72	15.27	8.92	2.46333333333333	10.3033333333333	2.06442738471207	2.01896937763084e-16	1.95025144399461e-14	Igf1	insulin-like growth factor 1 [Source:MGI Symbol;Acc:MGI:96432]	Human Diseases;Environmental Information Processing;Human Diseases;Environmental Information Processing;Environmental Information Processing;Environmental Information Processing;Human Diseases;Human Diseases;Cellular Processes;Environmental Information Processing;Human Diseases;Cellular Processes;Environmental Information Processing;Organismal Systems;Environmental Information Processing;Environm…	Cancers;Signal transduction;Cancers;Signal transduction;Signal transduction;Signal transduction;Cardiovascular diseases;Cancers;Cellular community - eukaryotes;Signal transduction;Cancers;Cellular community - eukaryotes;Signal transduction;Sensory system;Signal transduction;Signal transduction;Cell growth and death;Endocrine system;Cancers;Drug resistance;Cardiovascular diseases;Endocrine system;…	ko05200//Pathways in cancer;ko04151//PI3K-Akt signaling pathway;ko05202//Transcriptional misregulation in cancers;ko04010//MAPK signaling pathway;ko04014//Ras signaling pathway;ko04015//Rap1 signaling pathway;ko05414//Dilated cardiomyopathy (DCM);ko05205//Proteoglycans in cancer;ko04510//Focal adhesion;ko04150//mTOR signaling pathway;ko05224//Breast cancer;ko04550//Signaling pathways regulating p…	K05459;K05459;K05459;K05459;K05459;K05459;K05459;K05459;K05459;K05459;K05459;K05459;K05459;K05459;K05459;K05459;K05459;K05459;K05459;K05459;K05459;K05459;K05459;K05459;K05459;K05459;K05459;K05459;K05459;K05459;K05459	GO:0005576//extracellular region;GO:0005614//interstitial matrix;GO:0005615//extracellular space;GO:0005623//cell;GO:0005737//cytoplasm;GO:0005886//plasma membrane;GO:0031091//platelet alpha granule;GO:0035867//alphav-beta3 integrin-IGF-1-IGF1R complex;GO:0042567//insulin-like growth factor ternary complex;GO:0043025//neuronal cell body;GO:0070382//exocytic vesicle	GO:0005158//insulin receptor binding;GO:0005159//insulin-like growth factor receptor binding;GO:0005178//integrin binding;GO:0005179//hormone activity;GO:0005496//steroid binding;GO:0005515//protein binding;GO:0008083//growth factor activity;GO:0043539//protein serine/threonine kinase activator activity	GO:0000187//activation of MAPK activity;GO:0001649//osteoblast differentiation;GO:0001775//cell activation;GO:0001932//regulation of protein phosphorylation;GO:0001974//blood vessel remodeling;GO:0002683//negative regulation of immune system process;GO:0006417//regulation of translation;GO:0007165//signal transduction;GO:0007399//nervous system development;GO:0007608//sensory perception of smell;…
ENSMUSG00000094930	53	47	12	1114	1297	785	5.83	5.17	1.39	118.04	159.75	91.84	4.13	123.21	4.89883376128077	2.20675935789088e-16	2.11888540741199e-14	Igkv6-25	immunoglobulin kappa chain variable 6-25 [Source:MGI Symbol;Acc:MGI:4439867]	-	-	-	-	GO:0005615//extracellular space	-	GO:0002377//immunoglobulin production;GO:0006955//immune response
ENSMUSG00000036814	60	50	50	222	390	261	0.92	0.76	1.10	4.46	6.96	5.29	0.926666666666667	5.57	2.58755494533768	2.28714397046785e-16	2.18299723609834e-14	Slc6a20a	solute carrier family 6 (neurotransmitter transporter), member 20A [Source:MGI Symbol;Acc:MGI:2143217]	-	-	-	-	GO:0005886//plasma membrane;GO:0005887//integral component of plasma membrane;GO:0016020//membrane;GO:0016021//integral component of membrane;GO:0016324//apical plasma membrane	GO:0005328//neurotransmitter:sodium symporter activity;GO:0015171//amino acid transmembrane transporter activity;GO:0015193//L-proline transmembrane transporter activity;GO:0015293//symporter activity	GO:0006836//neurotransmitter transport;GO:0006865//amino acid transport;GO:0015816//glycine transport;GO:0015824//proline transport;GO:0015838//amino-acid betaine transport;GO:0035524//proline transmembrane transport;GO:0055085//transmembrane transport
ENSMUSG00000063011	2215	2181	2324	1231	902	826	43.91	42.99	47.86	23.28	19.76	17.18	44.92	20.0733333333333	-1.16207772039708	2.83033785243292e-16	2.68547144755987e-14	Msln	mesothelin [Source:MGI Symbol;Acc:MGI:1888992]	-	-	-	-	GO:0005576//extracellular region;GO:0005615//extracellular space;GO:0005794//Golgi apparatus;GO:0005886//plasma membrane;GO:0009986//cell surface;GO:0016020//membrane;GO:0031225//anchored component of membrane	GO:0005515//protein binding	GO:0007155//cell adhesion;GO:0007160//cell-matrix adhesion;GO:0031016//pancreas development
ENSMUSG00000076555	4	4	4	60	197	384	0.45	0.45	0.47	6.48	24.71	45.78	0.456666666666667	25.6566666666667	5.81204844900583	2.85772072328578e-16	2.69550304693456e-14	Igkv4-57-1	immunoglobulin kappa variable 4-57-1 [Source:MGI Symbol;Acc:MGI:2686264]	-	-	-	-	GO:0005615//extracellular space	-	GO:0002377//immunoglobulin production;GO:0006955//immune response
ENSMUSG00000018907	12	8	5	109	103	78	0.21	0.14	0.09	1.81	1.99	1.43	0.146666666666667	1.74333333333333	3.57123551760964	3.101119043074e-16	2.90797917284746e-14	Alox12e	arachidonate lipoxygenase, epidermal [Source:MGI Symbol;Acc:MGI:1274790]	Metabolism;Organismal Systems;Organismal Systems;Metabolism;Human Diseases	Global and overview maps;Nervous system;Sensory system;Lipid metabolism;Drug resistance	ko01100//Metabolic pathways;ko04726//Serotonergic synapse;ko04750//Inflammatory mediator regulation of TRP channels;ko00590//Arachidonic acid metabolism;ko01523//Antifolate resistance	K00458;K00458;K00458;K00458;K00458	GO:0005737//cytoplasm;GO:0005829//cytosol;GO:0005886//plasma membrane	GO:0004052//arachidonate 12-lipoxygenase activity;GO:0005506//iron ion binding;GO:0005515//protein binding;GO:0016165//linoleate 13S-lipoxygenase activity;GO:0016491//oxidoreductase activity;GO:0016702//oxidoreductase activity, acting on single donors with incorporation of molecular oxygen, incorporation of two atoms of oxygen;GO:0046872//metal ion binding;GO:0050473//arachidonate 15-lipoxygenase…	GO:0006629//lipid metabolic process;GO:0006631//fatty acid metabolic process;GO:0019369//arachidonic acid metabolic process;GO:0019372//lipoxygenase pathway;GO:0034440//lipid oxidation;GO:0051122//hepoxilin biosynthetic process;GO:0055114//oxidation-reduction process
ENSMUSG00000057596	7	6	1	73	210	190	0.12	0.11	0.01	1.23	4.43	3.50	0.08	3.05333333333333	5.25424128737579	3.5138869672023e-16	3.25694667740398e-14	Trim30d	tripartite motif-containing 30D [Source:MGI Symbol;Acc:MGI:3035181]	Human Diseases	Infectious disease: viral	ko05170//Human immunodeficiency virus 1 infection	K10648	GO:0005575//cellular_component	GO:0003674//molecular_function;GO:0004842//ubiquitin-protein transferase activity;GO:0005515//protein binding;GO:0008270//zinc ion binding;GO:0046872//metal ion binding	GO:0006914//autophagy;GO:0008150//biological_process;GO:0016567//protein ubiquitination;GO:0045087//innate immune response;GO:0051607//defense response to virus
ENSMUSG00000074622	255	289	243	933	773	573	3.20	3.59	3.18	11.17	10.76	7.58	3.32333333333333	9.83666666666667	1.56553851103381	3.97662189237477e-16	3.66466276116261e-14	Mafb	v-maf musculoaponeurotic fibrosarcoma oncogene family, protein B (avian) [Source:MGI Symbol;Acc:MGI:104555]	Organismal Systems	Endocrine system	ko04928//Parathyroid hormone synthesis, secretion and action	K09036	GO:0005634//nucleus;GO:0005654//nucleoplasm;GO:0005667//transcription factor complex	GO:0000978//RNA polymerase II core promoter proximal region sequence-specific DNA binding;GO:0000981//RNA polymerase II transcription factor activity, sequence-specific DNA binding;GO:0001228//transcriptional activator activity, RNA polymerase II transcription regulatory region sequence-specific binding;GO:0003677//DNA binding;GO:0003700//transcription factor activity, sequence-specific DNA bindi…	GO:0006355//regulation of transcription, DNA-templated;GO:0006357//regulation of transcription from RNA polymerase II promoter;GO:0007379//segment specification;GO:0007585//respiratory gaseous exchange;GO:0021571//rhombomere 5 development;GO:0021572//rhombomere 6 development;GO:0021599//abducens nerve formation;GO:0033077//T cell differentiation in thymus;GO:0035284//brain segmentation;GO:0042472…
ENSMUSG00000078771	167	184	179	478	667	507	4.95	5.67	5.09	13.81	20.90	15.26	5.23666666666667	16.6566666666667	1.66937903744169	4.05224727504904e-16	3.71301628888065e-14	Evi2a	ecotropic viral integration site 2a [Source:MGI Symbol;Acc:MGI:95458]	-	-	-	-	GO:0016020//membrane;GO:0016021//integral component of membrane	-	-
ENSMUSG00000076541	3	6	2	79	100	209	0.35	0.70	0.25	8.89	13.07	25.96	0.433333333333333	15.9733333333333	5.20404437976033	4.23679844900551e-16	3.86006040510246e-14	Igkv4-79	immunoglobulin kappa variable 4-79 [Source:MGI Symbol;Acc:MGI:2685040]	-	-	-	-	GO:0005615//extracellular space	-	GO:0002377//immunoglobulin production;GO:0006955//immune response
ENSMUSG00000052305	168323	174432	162521	89982	58418	54558	11307.77	11604.64	11377.91	5769.49	4352.74	3863.00	11430.1066666667	4661.74333333333	-1.29389738722237	4.28295440789922e-16	3.88006632376633e-14	Hbb-bs	hemoglobin, beta adult s chain [Source:MGI Symbol;Acc:MGI:5474852]	Human Diseases;Human Diseases	Infectious diseases;Infectious diseases	ko05143//African trypanosomiasis;ko05144//Malaria	K13823;K13823	GO:0005615//extracellular space;GO:0005833//hemoglobin complex;GO:0031838//haptoglobin-hemoglobin complex	GO:0004601//peroxidase activity;GO:0005344//oxygen transporter activity;GO:0019825//oxygen binding;GO:0020037//heme binding;GO:0030492//hemoglobin binding;GO:0031720//haptoglobin binding;GO:0031721//hemoglobin alpha binding;GO:0031722//hemoglobin beta binding;GO:0043177//organic acid binding;GO:0044877//macromolecular complex binding;GO:0046872//metal ion binding	GO:0015671//oxygen transport;GO:0042744//hydrogen peroxide catabolic process;GO:0098869//cellular oxidant detoxification
ENSMUSG00000076543	5	4	9	499	1512	297	0.54	0.42	1.00	50.95	179.52	33.48	0.653333333333333	87.9833333333333	7.07326720144278	4.9754423663868e-16	4.45705130419063e-14	Igkv4-74	immunoglobulin kappa variable 4-74 [Source:MGI Symbol;Acc:MGI:3779447]	-	-	-	-	GO:0005615//extracellular space	-	GO:0002377//immunoglobulin production;GO:0006955//immune response
ENSMUSG00000076655	26	23	9	155	284	174	2.65	2.32	0.96	15.08	32.10	18.69	1.97666666666667	21.9566666666667	3.47351754024014	6.40462850872938e-16	5.70545656319309e-14	Ighv4-1	immunoglobulin heavy variable 4-1 [Source:MGI Symbol;Acc:MGI:4439536]	Environmental Information Processing;Human Diseases;Human Diseases;Environmental Information Processing;Cellular Processes;Human Diseases;Human Diseases;Environmental Information Processing;Human Diseases;Human Diseases;Human Diseases;Environmental Information Processing;Organismal Systems;Human Diseases;Human Diseases;Organismal Systems;Organismal Systems;Human Diseases;Organismal Systems;Human …	Signal transduction;Infectious diseases;Infectious diseases;Signal transduction;Transport and catabolism;Cancers;Infectious diseases;Signal transduction;Immune diseases;Infectious diseases;Infectious diseases;Signal transduction;Immune system;Immune diseases;Cardiovascular diseases;Immune system;Immune system;Cardiovascular diseases;Immune system;Immune diseases;Infectious diseases;Immune system;…	ko04151//PI3K-Akt signaling pathway;ko05169//Epstein-Barr virus infection;ko05130//Pathogenic Escherichia coli infection;ko04020//Calcium signaling pathway;ko04145//Phagosome;ko05202//Transcriptional misregulation in cancers;ko05152//Tuberculosis;ko04072//Phospholipase D signaling pathway;ko05322//Systemic lupus erythematosus;ko05150//Staphylococcus aureus infection;ko05146//Amoebiasis;ko04064//N…	K06856;K06856;K06856;K06856;K06856;K06856;K06856;K06856;K06856;K06856;K06856;K06856;K06856;K06856;K06856;K06856;K06856;K06856;K06856;K06856;K06856;K06856;K06856;K06856;K06856;K06856;K06856	GO:0009897//external side of plasma membrane;GO:0042571//immunoglobulin complex, circulating	GO:0003823//antigen binding;GO:0034987//immunoglobulin receptor binding	GO:0006910//phagocytosis, recognition;GO:0006911//phagocytosis, engulfment;GO:0006958//complement activation, classical pathway;GO:0042742//defense response to bacterium;GO:0045087//innate immune response;GO:0050853//B cell receptor signaling pathway;GO:0050871//positive regulation of B cell activation
ENSMUSG00000024679	270	223	146	792	597	726	8.03	6.57	4.53	22.63	19.80	22.92	6.37666666666667	21.7833333333333	1.77235036233668	7.41190235941268e-16	6.56629029465096e-14	Ms4a6d	membrane-spanning 4-domains, subfamily A, member 6D [Source:MGI Symbol;Acc:MGI:1916024]	-	-	-	-	GO:0016020//membrane;GO:0016021//integral component of membrane	-	-
ENSMUSG00000043263	75	100	70	293	582	457	1.38	1.60	1.32	5.22	11.63	8.67	1.43333333333333	8.50666666666667	2.56921976417541	7.65733205610846e-16	6.746446127456e-14	Ifi209	interferon activated gene 209 [Source:MGI Symbol;Acc:MGI:2138243]	Organismal Systems	Immune system	ko04621//NOD-like receptor signaling pathway	K20914	GO:0005634//nucleus;GO:0005654//nucleoplasm;GO:0005730//nucleolus;GO:0005829//cytosol	GO:0000978//RNA polymerase II core promoter proximal region sequence-specific DNA binding;GO:0001227//transcriptional repressor activity, RNA polymerase II transcription regulatory region sequence-specific binding;GO:0003690//double-stranded DNA binding;GO:0008134//transcription factor binding;GO:0042802//identical protein binding	GO:0000122//negative regulation of transcription from RNA polymerase II promoter;GO:0002218//activation of innate immune response;GO:0035458//cellular response to interferon-beta
ENSMUSG00000029925	339	318	334	730	573	643	7.24	6.71	7.42	15.23	13.76	14.68	7.12333333333333	14.5566666666667	1.03105562312045	7.77580908358224e-16	6.81339336913887e-14	Tbxas1	thromboxane A synthase 1, platelet [Source:MGI Symbol;Acc:MGI:98497]	Metabolism;Organismal Systems;Metabolism	Global and overview maps;Immune system;Lipid metabolism	ko01100//Metabolic pathways;ko04611//Platelet activation;ko00590//Arachidonic acid metabolism	K01832;K01832;K01832	GO:0005623//cell;GO:0005783//endoplasmic reticulum;GO:0005789//endoplasmic reticulum membrane;GO:0016020//membrane;GO:0016021//integral component of membrane	GO:0004497//monooxygenase activity;GO:0004796//thromboxane-A synthase activity;GO:0005506//iron ion binding;GO:0016491//oxidoreductase activity;GO:0016705//oxidoreductase activity, acting on paired donors, with incorporation or reduction of molecular oxygen;GO:0016853//isomerase activity;GO:0020037//heme binding;GO:0046872//metal ion binding	GO:0001516//prostaglandin biosynthetic process;GO:0006629//lipid metabolic process;GO:0006631//fatty acid metabolic process;GO:0006633//fatty acid biosynthetic process;GO:0006693//prostaglandin metabolic process;GO:0030644//cellular chloride ion homeostasis;GO:0045471//response to ethanol;GO:0045907//positive regulation of vasoconstriction;GO:0055114//oxidation-reduction process;GO:0070542//respo…
ENSMUSG00000016256	3111	3473	3364	6844	7531	5900	91.08	100.69	102.63	191.24	244.54	182.06	98.1333333333333	205.946666666667	1.06945560509595	8.14655775038339e-16	7.09945943083683e-14	Ctsz	cathepsin Z [Source:MGI Symbol;Acc:MGI:1891190]	Cellular Processes;Cellular Processes	Cell growth and death;Transport and catabolism	ko04210//Apoptosis;ko04142//Lysosome	K08568;K08568	GO:0005615//extracellular space;GO:0005764//lysosome;GO:0005783//endoplasmic reticulum;GO:0009986//cell surface;GO:0030426//growth cone;GO:0031410//cytoplasmic vesicle;GO:0043231//intracellular membrane-bounded organelle;GO:0099738//cell cortex region	GO:0004180//carboxypeptidase activity;GO:0004197//cysteine-type endopeptidase activity;GO:0008233//peptidase activity;GO:0008234//cysteine-type peptidase activity;GO:0016787//hydrolase activity	GO:0006508//proteolysis;GO:0010757//negative regulation of plasminogen activation;GO:0010977//negative regulation of neuron projection development;GO:0032091//negative regulation of protein binding;GO:0043525//positive regulation of neuron apoptotic process;GO:0051603//proteolysis involved in cellular protein catabolic process;GO:0060441//epithelial tube branching involved in lung morphogenesis;G…
ENSMUSG00000024164	30230	22588	25714	58269	50858	47911	248.31	183.74	220.10	456.82	463.33	414.79	217.383333333333	444.98	1.03349916046564	1.6923289011576e-15	1.46683750973309e-13	C3	complement component 3 [Source:MGI Symbol;Acc:MGI:88227]	Human Diseases;Environmental Information Processing;Cellular Processes;Human Diseases;Human Diseases;Human Diseases;Human Diseases;Human Diseases;Human Diseases;Human Diseases;Human Diseases;Organismal Systems;Human Diseases;Human Diseases	Infectious diseases;Signaling molecules and interaction;Transport and catabolism;Infectious diseases;Immune diseases;Infectious diseases;Infectious diseases;Cancers;Infectious diseases;Infectious diseases;Infectious diseases;Immune system;Infectious diseases;Infectious diseases	ko05168//Herpes simplex infection;ko04080//Neuroactive ligand-receptor interaction;ko04145//Phagosome;ko05152//Tuberculosis;ko05322//Systemic lupus erythematosus;ko05150//Staphylococcus aureus infection;ko05131//Shigellosis;ko05203//Viral carcinogenesis;ko05167//Kaposi sarcoma-associated herpesvirus infection;ko05140//Leishmaniasis;ko05142//Chagas disease (American trypanosomiasis);ko04610//Compl…	K03990;K03990;K03990;K03990;K03990;K03990;K03990;K03990;K03990;K03990;K03990;K03990;K03990;K03990	GO:0005576//extracellular region;GO:0005615//extracellular space;GO:0009986//cell surface;GO:0032991//macromolecular complex	GO:0004866//endopeptidase inhibitor activity;GO:0005515//protein binding;GO:0008289//lipid binding;GO:0031715//C5L2 anaphylatoxin chemotactic receptor binding;GO:0048037//cofactor binding	GO:0001798//positive regulation of type IIa hypersensitivity;GO:0001934//positive regulation of protein phosphorylation;GO:0001970//positive regulation of activation of membrane attack complex;GO:0002376//immune system process;GO:0006629//lipid metabolic process;GO:0006631//fatty acid metabolic process;GO:0006954//inflammatory response;GO:0006956//complement activation;GO:0006957//complement acti…
ENSMUSG00000076934	76	34	19	862	1604	1573	8.18	3.64	2.11	88.80	191.91	178.89	4.64333333333333	153.2	5.04411163493222	1.97718679946074e-15	1.70010041090899e-13	Iglv1	immunoglobulin lambda variable 1 [Source:MGI Symbol;Acc:MGI:96530]	-	-	-	-	GO:0005615//extracellular space	-	GO:0002377//immunoglobulin production;GO:0006955//immune response
ENSMUSG00000093894	3	2	5	91	90	335	0.36	0.24	0.63	10.44	12.04	42.43	0.41	21.6366666666667	5.72171053549869	1.98265529678815e-15	1.70010041090899e-13	Ighv1-53	immunoglobulin heavy variable 1-53 [Source:MGI Symbol;Acc:MGI:3576502]	Environmental Information Processing;Human Diseases;Human Diseases;Environmental Information Processing;Cellular Processes;Human Diseases;Human Diseases;Environmental Information Processing;Human Diseases;Human Diseases;Human Diseases;Environmental Information Processing;Organismal Systems;Human Diseases;Human Diseases;Organismal Systems;Organismal Systems;Human Diseases;Organismal Systems;Human …	Signal transduction;Infectious diseases;Infectious diseases;Signal transduction;Transport and catabolism;Cancers;Infectious diseases;Signal transduction;Immune diseases;Infectious diseases;Infectious diseases;Signal transduction;Immune system;Immune diseases;Cardiovascular diseases;Immune system;Immune system;Cardiovascular diseases;Immune system;Immune diseases;Infectious diseases;Immune system;…	ko04151//PI3K-Akt signaling pathway;ko05169//Epstein-Barr virus infection;ko05130//Pathogenic Escherichia coli infection;ko04020//Calcium signaling pathway;ko04145//Phagosome;ko05202//Transcriptional misregulation in cancers;ko05152//Tuberculosis;ko04072//Phospholipase D signaling pathway;ko05322//Systemic lupus erythematosus;ko05150//Staphylococcus aureus infection;ko05146//Amoebiasis;ko04064//N…	K06856;K06856;K06856;K06856;K06856;K06856;K06856;K06856;K06856;K06856;K06856;K06856;K06856;K06856;K06856;K06856;K06856;K06856;K06856;K06856;K06856;K06856;K06856;K06856;K06856;K06856;K06856	GO:0009897//external side of plasma membrane;GO:0042571//immunoglobulin complex, circulating	GO:0003823//antigen binding;GO:0034987//immunoglobulin receptor binding	GO:0006910//phagocytosis, recognition;GO:0006911//phagocytosis, engulfment;GO:0006958//complement activation, classical pathway;GO:0042742//defense response to bacterium;GO:0045087//innate immune response;GO:0050853//B cell receptor signaling pathway;GO:0050871//positive regulation of B cell activation
ENSMUSG00000094694	10	22	11	664	135	190	1.20	2.62	1.38	76.17	18.00	24.07	1.73333333333333	39.4133333333333	4.5070627411177	2.13358937315454e-15	1.8197928509858e-13	Ighv1-9	immunoglobulin heavy variable V1-9 [Source:MGI Symbol;Acc:MGI:4439621]	Environmental Information Processing;Human Diseases;Human Diseases;Environmental Information Processing;Cellular Processes;Human Diseases;Human Diseases;Environmental Information Processing;Human Diseases;Human Diseases;Human Diseases;Environmental Information Processing;Organismal Systems;Human Diseases;Human Diseases;Organismal Systems;Organismal Systems;Human Diseases;Organismal Systems;Human …	Signal transduction;Infectious diseases;Infectious diseases;Signal transduction;Transport and catabolism;Cancers;Infectious diseases;Signal transduction;Immune diseases;Infectious diseases;Infectious diseases;Signal transduction;Immune system;Immune diseases;Cardiovascular diseases;Immune system;Immune system;Cardiovascular diseases;Immune system;Immune diseases;Infectious diseases;Immune system;…	ko04151//PI3K-Akt signaling pathway;ko05169//Epstein-Barr virus infection;ko05130//Pathogenic Escherichia coli infection;ko04020//Calcium signaling pathway;ko04145//Phagosome;ko05202//Transcriptional misregulation in cancers;ko05152//Tuberculosis;ko04072//Phospholipase D signaling pathway;ko05322//Systemic lupus erythematosus;ko05150//Staphylococcus aureus infection;ko05146//Amoebiasis;ko04064//N…	K06856;K06856;K06856;K06856;K06856;K06856;K06856;K06856;K06856;K06856;K06856;K06856;K06856;K06856;K06856;K06856;K06856;K06856;K06856;K06856;K06856;K06856;K06856;K06856;K06856;K06856;K06856	GO:0009897//external side of plasma membrane;GO:0042571//immunoglobulin complex, circulating	GO:0003823//antigen binding;GO:0034987//immunoglobulin receptor binding	GO:0006910//phagocytosis, recognition;GO:0006911//phagocytosis, engulfment;GO:0006958//complement activation, classical pathway;GO:0042742//defense response to bacterium;GO:0045087//innate immune response;GO:0050853//B cell receptor signaling pathway;GO:0050871//positive regulation of B cell activation
ENSMUSG00000038179	142	77	59	488	582	427	3.84	1.83	1.79	13.18	17.40	13.30	2.48666666666667	14.6266666666667	2.55631599014796	2.40427134949504e-15	2.02907847837647e-13	Slamf7	SLAM family member 7 [Source:MGI Symbol;Acc:MGI:1922595]	-	-	-	-	GO:0016020//membrane;GO:0016021//integral component of membrane	-	-
ENSMUSG00000096498	25	20	10	1023	1552	330	2.20	1.74	0.92	85.81	151.26	30.57	1.62	89.2133333333333	5.78319362529029	2.65951706866899e-15	2.23274116209986e-13	Ighv2-5	immunoglobulin heavy variable 2-5 [Source:MGI Symbol;Acc:MGI:4439517]	Environmental Information Processing;Human Diseases;Human Diseases;Environmental Information Processing;Cellular Processes;Human Diseases;Human Diseases;Environmental Information Processing;Human Diseases;Human Diseases;Human Diseases;Environmental Information Processing;Organismal Systems;Human Diseases;Human Diseases;Organismal Systems;Organismal Systems;Human Diseases;Organismal Systems;Human …	Signal transduction;Infectious diseases;Infectious diseases;Signal transduction;Transport and catabolism;Cancers;Infectious diseases;Signal transduction;Immune diseases;Infectious diseases;Infectious diseases;Signal transduction;Immune system;Immune diseases;Cardiovascular diseases;Immune system;Immune system;Cardiovascular diseases;Immune system;Immune diseases;Infectious diseases;Immune system;…	ko04151//PI3K-Akt signaling pathway;ko05169//Epstein-Barr virus infection;ko05130//Pathogenic Escherichia coli infection;ko04020//Calcium signaling pathway;ko04145//Phagosome;ko05202//Transcriptional misregulation in cancers;ko05152//Tuberculosis;ko04072//Phospholipase D signaling pathway;ko05322//Systemic lupus erythematosus;ko05150//Staphylococcus aureus infection;ko05146//Amoebiasis;ko04064//N…	K06856;K06856;K06856;K06856;K06856;K06856;K06856;K06856;K06856;K06856;K06856;K06856;K06856;K06856;K06856;K06856;K06856;K06856;K06856;K06856;K06856;K06856;K06856;K06856;K06856;K06856;K06856	GO:0009897//external side of plasma membrane;GO:0042571//immunoglobulin complex, circulating	GO:0003823//antigen binding;GO:0034987//immunoglobulin receptor binding	GO:0006910//phagocytosis, recognition;GO:0006911//phagocytosis, engulfment;GO:0006958//complement activation, classical pathway;GO:0042742//defense response to bacterium;GO:0045087//innate immune response;GO:0050853//B cell receptor signaling pathway;GO:0050871//positive regulation of B cell activation
ENSMUSG00000024675	154	171	101	447	528	693	4.40	4.14	4.22	14.20	18.33	22.84	4.25333333333333	18.4566666666667	2.11747619276553	2.70932186789027e-15	2.26270709123023e-13	Ms4a4c	membrane-spanning 4-domains, subfamily A, member 4C [Source:MGI Symbol;Acc:MGI:1927656]	-	-	-	-	GO:0005575//cellular_component;GO:0016020//membrane;GO:0016021//integral component of membrane	GO:0003674//molecular_function	GO:0008150//biological_process
ENSMUSG00000095519	3	2	1	122	447	73	0.32	0.21	0.11	12.31	52.47	8.19	0.213333333333333	24.3233333333333	6.83308773842201	3.42956948476989e-15	2.82016136863001e-13	Ighv1-66	immunoglobulin heavy variable 1-66 [Source:MGI Symbol;Acc:MGI:4439825]	Environmental Information Processing;Human Diseases;Human Diseases;Environmental Information Processing;Cellular Processes;Human Diseases;Human Diseases;Environmental Information Processing;Human Diseases;Human Diseases;Human Diseases;Environmental Information Processing;Organismal Systems;Human Diseases;Human Diseases;Organismal Systems;Organismal Systems;Human Diseases;Organismal Systems;Human …	Signal transduction;Infectious diseases;Infectious diseases;Signal transduction;Transport and catabolism;Cancers;Infectious diseases;Signal transduction;Immune diseases;Infectious diseases;Infectious diseases;Signal transduction;Immune system;Immune diseases;Cardiovascular diseases;Immune system;Immune system;Cardiovascular diseases;Immune system;Immune diseases;Infectious diseases;Immune system;…	ko04151//PI3K-Akt signaling pathway;ko05169//Epstein-Barr virus infection;ko05130//Pathogenic Escherichia coli infection;ko04020//Calcium signaling pathway;ko04145//Phagosome;ko05202//Transcriptional misregulation in cancers;ko05152//Tuberculosis;ko04072//Phospholipase D signaling pathway;ko05322//Systemic lupus erythematosus;ko05150//Staphylococcus aureus infection;ko05146//Amoebiasis;ko04064//N…	K06856;K06856;K06856;K06856;K06856;K06856;K06856;K06856;K06856;K06856;K06856;K06856;K06856;K06856;K06856;K06856;K06856;K06856;K06856;K06856;K06856;K06856;K06856;K06856;K06856;K06856;K06856	GO:0009897//external side of plasma membrane;GO:0042571//immunoglobulin complex, circulating	GO:0003823//antigen binding;GO:0034987//immunoglobulin receptor binding	GO:0006910//phagocytosis, recognition;GO:0006911//phagocytosis, engulfment;GO:0006958//complement activation, classical pathway;GO:0042742//defense response to bacterium;GO:0045087//innate immune response;GO:0050853//B cell receptor signaling pathway;GO:0050871//positive regulation of B cell activation
ENSMUSG00000018008	1063	1023	983	1997	2400	1978	18.90	18.49	20.30	36.05	49.94	41.40	19.23	42.4633333333333	1.14285886326907	3.47869005622888e-15	2.84595893120562e-13	Cyth4	cytohesin 4 [Source:MGI Symbol;Acc:MGI:2441702]	Human Diseases;Environmental Information Processing;Cellular Processes;Human Diseases	Infectious diseases;Signal transduction;Transport and catabolism;Infectious diseases	ko05130//Pathogenic Escherichia coli infection;ko04072//Phospholipase D signaling pathway;ko04144//Endocytosis;ko05132//Salmonella infection	K18441;K18441;K18441;K18441	GO:0005886//plasma membrane;GO:0016020//membrane	GO:0005085//guanyl-nucleotide exchange factor activity;GO:0005086//ARF guanyl-nucleotide exchange factor activity;GO:0008289//lipid binding	GO:0032012//regulation of ARF protein signal transduction
ENSMUSG00000022014	145	153	119	356	466	421	3.48	3.44	2.88	7.92	12.05	10.12	3.26666666666667	10.03	1.61843045233076	3.58890596845865e-15	2.92122371595099e-13	Epsti1	epithelial stromal interaction 1 (breast) [Source:MGI Symbol;Acc:MGI:1915168]	-	-	-	-	GO:0005575//cellular_component	GO:0003674//molecular_function	GO:0008150//biological_process
ENSMUSG00000096422	36	25	12	2891	4112	585	3.78	2.60	1.32	290.27	479.81	64.82	2.56666666666667	278.3	6.76060115335786	3.81860953485717e-15	3.09249514603206e-13	Igkv12-44	immunoglobulin kappa variable 12-44 [Source:MGI Symbol;Acc:MGI:4439775]	-	-	-	-	GO:0005615//extracellular space	-	GO:0002377//immunoglobulin production;GO:0006955//immune response
ENSMUSG00000022667	138	174	116	395	403	373	3.14	3.79	2.61	8.28	9.58	8.66	3.18	8.84	1.47501960410708	4.11695774579345e-15	3.31735766099488e-13	Cd200r1	CD200 receptor 1 [Source:MGI Symbol;Acc:MGI:1889024]	Human Diseases	Infectious diseases	ko05167//Kaposi sarcoma-associated herpesvirus infection	K21668	GO:0005886//plasma membrane;GO:0009897//external side of plasma membrane;GO:0009986//cell surface;GO:0016020//membrane;GO:0016021//integral component of membrane;GO:0043235//receptor complex	GO:0005515//protein binding;GO:0038023//signaling receptor activity;GO:0086080//protein binding involved in heterotypic cell-cell adhesion	GO:0034113//heterotypic cell-cell adhesion;GO:1900165//negative regulation of interleukin-6 secretion;GO:1901215//negative regulation of neuron death;GO:2000405//negative regulation of T cell migration
ENSMUSG00000093861	101	61	60	1094	522	315	10.62	6.36	6.58	109.89	60.91	34.96	7.85333333333333	68.5866666666667	3.12655110349749	4.48383253349469e-15	3.59491273372937e-13	Igkv1-110	immunoglobulin kappa variable 1-110 [Source:MGI Symbol;Acc:MGI:4439558]	-	-	-	-	GO:0005615//extracellular space	-	GO:0002377//immunoglobulin production;GO:0006955//immune response
ENSMUSG00000002985	4700	3883	4324	10968	9787	7587	167.72	138.67	159.80	373.65	388.88	286.03	155.396666666667	349.52	1.16941945332061	5.0962962736469e-15	4.06562740039443e-13	Apoe	apolipoprotein E [Source:MGI Symbol;Acc:MGI:88057]	Human Diseases;Organismal Systems	Neurodegenerative diseases;Digestive system	ko05010//Alzheimer disease;ko04979//Cholesterol metabolism	K04524;K04524	GO:0005576//extracellular region;GO:0005615//extracellular space;GO:0005623//cell;GO:0005635//nuclear envelope;GO:0005737//cytoplasm;GO:0005764//lysosome;GO:0005768//endosome;GO:0005769//early endosome;GO:0005770//late endosome;GO:0005783//endoplasmic reticulum;GO:0005794//Golgi apparatus;GO:0005829//cytosol;GO:0005874//microtubule;GO:0005886//plasma membrane;GO:0009986//cell surface;GO:0030425//…	GO:0001540//beta-amyloid binding;GO:0005102//receptor binding;GO:0005319//lipid transporter activity;GO:0005515//protein binding;GO:0005543//phospholipid binding;GO:0008201//heparin binding;GO:0008289//lipid binding;GO:0016209//antioxidant activity;GO:0042802//identical protein binding;GO:0042803//protein homodimerization activity;GO:0043395//heparan sulfate proteoglycan binding;GO:0044877//macro…	GO:0001937//negative regulation of endothelial cell proliferation;GO:0002021//response to dietary excess;GO:0006629//lipid metabolic process;GO:0006641//triglyceride metabolic process;GO:0006707//cholesterol catabolic process;GO:0006869//lipid transport;GO:0006874//cellular calcium ion homeostasis;GO:0006898//receptor-mediated endocytosis;GO:0006979//response to oxidative stress;GO:0007186//G-pro…
ENSMUSG00000076545	3	3	2	170	46	295	0.31	0.35	0.22	17.02	5.34	32.61	0.293333333333333	18.3233333333333	5.96499714540046	5.53949489453072e-15	4.39731686305941e-13	Igkv4-72	immunoglobulin kappa chain variable 4-72 [Source:MGI Symbol;Acc:MGI:2686345]	-	-	-	-	GO:0005615//extracellular space	-	GO:0002377//immunoglobulin production;GO:0006955//immune response
ENSMUSG00000052477	115	148	103	336	452	440	5.76	7.45	5.27	15.74	26.30	24.26	6.16	22.1	1.84304411358389	5.75263896109795e-15	4.54401801680816e-13	C130026I21Rik	RIKEN cDNA C130026I21 gene [Source:MGI Symbol;Acc:MGI:3612702]	-	-	-	-	GO:0005575//cellular_component;GO:0005634//nucleus;GO:0016604//nuclear body	-	-
ENSMUSG00000079227	46	31	36	155	265	220	0.23	0.16	0.70	0.76	1.51	1.29	0.363333333333333	1.18666666666667	1.70754910618948	5.97508298294161e-15	4.69659096232689e-13	Ccr5	chemokine (C-C motif) receptor 5 [Source:MGI Symbol;Acc:MGI:107182]	Environmental Information Processing;Cellular Processes;Human Diseases;Human Diseases;Human Diseases;Human Diseases;Organismal Systems;Human Diseases;Environmental Information Processing	Signaling molecules and interaction;Transport and catabolism;Infectious diseases;Infectious disease: viral;Cancers;Infectious diseases;Immune system;Infectious diseases;Signaling molecules and interaction	ko04060//Cytokine-cytokine receptor interaction;ko04144//Endocytosis;ko05163//Human cytomegalovirus infection;ko05170//Human immunodeficiency virus 1 infection;ko05203//Viral carcinogenesis;ko05167//Kaposi sarcoma-associated herpesvirus infection;ko04062//Chemokine signaling pathway;ko05145//Toxoplasmosis;ko04061//Viral protein interaction with cytokine and cytokine receptor	K04180;K04180;K04180;K04180;K04180;K04180;K04180;K04180;K04180	GO:0005623//cell;GO:0005737//cytoplasm;GO:0005768//endosome;GO:0005886//plasma membrane;GO:0009897//external side of plasma membrane;GO:0009986//cell surface;GO:0016020//membrane;GO:0016021//integral component of membrane	GO:0003779//actin binding;GO:0004930//G-protein coupled receptor activity;GO:0004950//chemokine receptor activity;GO:0016493//C-C chemokine receptor activity;GO:0019901//protein kinase binding;GO:0019956//chemokine binding;GO:0019957//C-C chemokine binding;GO:0042802//identical protein binding;GO:0071791//chemokine (C-C motif) ligand 5 binding	GO:0000165//MAPK cascade;GO:0006816//calcium ion transport;GO:0006935//chemotaxis;GO:0006952//defense response;GO:0006954//inflammatory response;GO:0006955//immune response;GO:0007165//signal transduction;GO:0007186//G-protein coupled receptor signaling pathway;GO:0007204//positive regulation of cytosolic calcium ion concentration;GO:0007267//cell-cell signaling;GO:0010628//positive regulation of…
ENSMUSG00000033880	2616	2268	2330	5314	9313	8881	70.35	59.08	62.76	139.23	257.90	251.87	64.0633333333333	216.333333333333	1.75568520624247	6.29387816184527e-15	4.92304079635068e-13	Lgals3bp	lectin, galactoside-binding, soluble, 3 binding protein [Source:MGI Symbol;Acc:MGI:99554]	-	-	-	-	GO:0005576//extracellular region;GO:0005615//extracellular space;GO:0016020//membrane	GO:0005044//scavenger receptor activity;GO:0005515//protein binding	GO:0006897//endocytosis;GO:0007155//cell adhesion
ENSMUSG00000032265	539	552	472	1158	1333	1026	4.13	4.19	3.77	8.41	11.27	8.21	4.03	9.29666666666667	1.20593368977919	6.88747576552575e-15	5.33529825604857e-13	Tent5a	terminal nucleotidyltransferase 5A [Source:MGI Symbol;Acc:MGI:2670964]	-	-	-	-	GO:0005575//cellular_component	GO:1990817//RNA adenylyltransferase activity	GO:0009617//response to bacterium
ENSMUSG00000076547	17	21	3	157	204	149	1.89	2.27	0.37	16.63	25.14	17.46	1.51	19.7433333333333	3.70874513074876	7.29218477965437e-15	5.62164341066144e-13	Igkv4-70	immunoglobulin kappa chain variable 4-70 [Source:MGI Symbol;Acc:MGI:2686348]	-	-	-	-	GO:0005615//extracellular space	-	GO:0002377//immunoglobulin production;GO:0006955//immune response
ENSMUSG00000091345	216	107	102	968	818	525	1.08	0.55	0.54	4.62	4.47	2.72	0.723333333333333	3.93666666666667	2.44424201695268	8.30050574389684e-15	6.36835452647779e-13	Col6a5	collagen, type VI, alpha 5 [Source:MGI Symbol;Acc:MGI:3648134]	Environmental Information Processing;Human Diseases;Cellular Processes;Organismal Systems;Environmental Information Processing	Signal transduction;Infectious diseases;Cellular community - eukaryotes;Digestive system;Signaling molecules and interaction	ko04151//PI3K-Akt signaling pathway;ko05165//Human papillomavirus infection;ko04510//Focal adhesion;ko04974//Protein digestion and absorption;ko04512//ECM-receptor interaction	K06238;K06238;K06238;K06238;K06238	-	-	-
ENSMUSG00000022488	1964	2012	1597	3933	4531	3562	17.70	17.98	15.01	33.85	45.24	33.76	16.8966666666667	37.6166666666667	1.15463334948972	8.86646853020667e-15	6.77018204199352e-13	Nckap1l	NCK associated protein 1 like [Source:MGI Symbol;Acc:MGI:1926063]	Human Diseases;Human Diseases;Cellular Processes	Infectious diseases;Infectious diseases;Cell motility	ko05130//Pathogenic Escherichia coli infection;ko05132//Salmonella infection;ko04810//Regulation of actin cytoskeleton	K05750;K05750;K05750	GO:0005737//cytoplasm;GO:0005829//cytosol;GO:0016020//membrane;GO:0016021//integral component of membrane;GO:0031209//SCAR complex	GO:0005096//GTPase activator activity;GO:0030295//protein kinase activator activity;GO:0044877//macromolecular complex binding;GO:0048365//Rac GTPase binding	GO:0000902//cell morphogenesis;GO:0001782//B cell homeostasis;GO:0002262//myeloid cell homeostasis;GO:0006935//chemotaxis;GO:0016477//cell migration;GO:0030011//maintenance of cell polarity;GO:0030031//cell projection assembly;GO:0030593//neutrophil chemotaxis;GO:0030838//positive regulation of actin filament polymerization;GO:0030866//cortical actin cytoskeleton organization;GO:0030890//positive…
ENSMUSG00000026981	193	221	200	582	896	591	5.73	6.59	5.68	18.91	28.06	16.59	6	21.1866666666667	1.82012221813148	8.94752435169646e-15	6.7996944540025e-13	Il1rn	interleukin 1 receptor antagonist [Source:MGI Symbol;Acc:MGI:96547]	Environmental Information Processing	Signaling molecules and interaction	ko04060//Cytokine-cytokine receptor interaction	K05481	GO:0005576//extracellular region;GO:0005615//extracellular space;GO:0005737//cytoplasm;GO:0031982//vesicle	GO:0005125//cytokine activity;GO:0005149//interleukin-1 receptor binding;GO:0005150//interleukin-1, Type I receptor binding;GO:0005151//interleukin-1, Type II receptor binding;GO:0005152//interleukin-1 receptor antagonist activity;GO:0045352//interleukin-1 Type I receptor antagonist activity;GO:0045353//interleukin-1 Type II receptor antagonist activity	GO:0001660//fever generation;GO:0002437//inflammatory response to antigenic stimulus;GO:0006629//lipid metabolic process;GO:0006953//acute-phase response;GO:0006954//inflammatory response;GO:0006955//immune response;GO:0007165//signal transduction;GO:0007613//memory;GO:0014050//negative regulation of glutamate secretion;GO:0019233//sensory perception of pain;GO:0030073//insulin secretion;GO:00303…
ENSMUSG00000033213	4	0	3	87	155	74	0.22	0.00	0.20	4.50	9.50	4.33	0.14	6.11	5.44767364776113	9.43959463044376e-15	7.13980659901725e-13	AA467197	expressed sequence AA467197 [Source:MGI Symbol;Acc:MGI:3034182]	-	-	-	-	GO:0005634//nucleus;GO:0005739//mitochondrion;GO:0005751//mitochondrial respiratory chain complex IV;GO:0016020//membrane;GO:0016021//integral component of membrane	GO:0004129//cytochrome-c oxidase activity	GO:0009617//response to bacterium;GO:0022900//electron transport chain;GO:1902600//hydrogen ion transmembrane transport
ENSMUSG00000054342	110	90	121	374	356	274	2.38	1.93	2.73	7.74	8.56	6.26	2.34666666666667	7.52	1.68011973376149	9.55354096462909e-15	7.19206710647077e-13	Kcnn4	potassium intermediate/small conductance calcium-activated channel, subfamily N, member 4 [Source:MGI Symbol;Acc:MGI:1277957]	Organismal Systems;Organismal Systems;Organismal Systems;Organismal Systems	Digestive system;Endocrine system;Digestive system;Endocrine system	ko04974//Protein digestion and absorption;ko04911//Insulin secretion;ko04970//Salivary secretion;ko04929//GnRH secretion	K04945;K04945;K04945;K04945	GO:0005623//cell;GO:0005886//plasma membrane;GO:0005887//integral component of plasma membrane;GO:0016020//membrane;GO:0016021//integral component of membrane;GO:0016323//basolateral plasma membrane;GO:0016324//apical plasma membrane;GO:0031982//vesicle;GO:0043005//neuron projection;GO:0043025//neuronal cell body;GO:0045121//membrane raft	GO:0005267//potassium channel activity;GO:0005516//calmodulin binding;GO:0015269//calcium-activated potassium channel activity;GO:0016286//small conductance calcium-activated potassium channel activity;GO:0019903//protein phosphatase binding;GO:0022894//Intermediate conductance calcium-activated potassium channel activity	GO:0002376//immune system process;GO:0006811//ion transport;GO:0006813//potassium ion transport;GO:0006816//calcium ion transport;GO:0006820//anion transport;GO:0006884//cell volume homeostasis;GO:0030322//stabilization of membrane potential;GO:0045332//phospholipid translocation;GO:0046541//saliva secretion;GO:0050714//positive regulation of protein secretion;GO:0050862//positive regulation of T…
ENSMUSG00000073490	134	77	60	382	481	423	1.65	0.99	0.82	4.49	6.69	5.70	1.15333333333333	5.62666666666667	2.28647096107047	9.69745465132068e-15	7.26629370719286e-13	Ifi207	interferon activated gene 207 [Source:MGI Symbol;Acc:MGI:2138302]	Organismal Systems	Immune system	ko04621//NOD-like receptor signaling pathway	K20914	GO:0005634//nucleus;GO:0005654//nucleoplasm;GO:0005730//nucleolus;GO:0005829//cytosol	GO:0000978//RNA polymerase II core promoter proximal region sequence-specific DNA binding;GO:0001227//transcriptional repressor activity, RNA polymerase II transcription regulatory region sequence-specific binding;GO:0003690//double-stranded DNA binding;GO:0008134//transcription factor binding;GO:0042802//identical protein binding	GO:0000122//negative regulation of transcription from RNA polymerase II promoter;GO:0002218//activation of innate immune response;GO:0035458//cellular response to interferon-beta
ENSMUSG00000060586	4786	4266	3124	8926	9335	9077	186.18	164.09	126.38	331.17	402.14	371.51	158.883333333333	368.273333333333	1.21280913980863	1.0658439064661e-14	7.94921257682975e-13	H2-Eb1	histocompatibility 2, class II antigen E beta [Source:MGI Symbol;Acc:MGI:95901]	Human Diseases;Human Diseases;Cellular Processes;Human Diseases;Human Diseases;Human Diseases;Human Diseases;Human Diseases;Organismal Systems;Human Diseases;Human Diseases;Human Diseases;Human Diseases;Human Diseases;Environmental Information Processing;Organismal Systems;Human Diseases;Human Diseases;Organismal Systems;Organismal Systems;Organismal Systems;Human Diseases;Human Diseases;Human Di…	Infectious diseases;Infectious diseases;Transport and catabolism;Infectious diseases;Immune diseases;Infectious diseases;Infectious diseases;Immune diseases;Immune system;Cardiovascular diseases;Immune diseases;Infectious diseases;Infectious diseases;Immune diseases;Signaling molecules and interaction;Immune system;Immune diseases;Infectious diseases;Immune system;Immune system;Immune system;Endo…	ko05168//Herpes simplex infection;ko05169//Epstein-Barr virus infection;ko04145//Phagosome;ko05152//Tuberculosis;ko05322//Systemic lupus erythematosus;ko05150//Staphylococcus aureus infection;ko05166//HTLV-I infection;ko05323//Rheumatoid arthritis;ko04640//Hematopoietic cell lineage;ko05416//Viral myocarditis;ko05320//Autoimmune thyroid disease;ko05140//Leishmaniasis;ko05164//Influenza A;ko05330/…	K06752;K06752;K06752;K06752;K06752;K06752;K06752;K06752;K06752;K06752;K06752;K06752;K06752;K06752;K06752;K06752;K06752;K06752;K06752;K06752;K06752;K06752;K06752;K06752	GO:0016020//membrane;GO:0016021//integral component of membrane;GO:0042613//MHC class II protein complex	-	GO:0006955//immune response;GO:0019882//antigen processing and presentation
ENSMUSG00000029771	412	461	384	838	982	886	8.67	9.88	8.45	16.19	22.10	18.81	9	19.0333333333333	1.08053133831201	1.15465086940234e-14	8.53217819855601e-13	Irf5	interferon regulatory factor 5 [Source:MGI Symbol;Acc:MGI:1350924]	Organismal Systems	Immune system	ko04620//Toll-like receptor signaling pathway	K09446	GO:0005634//nucleus;GO:0005737//cytoplasm	GO:0000981//RNA polymerase II transcription factor activity, sequence-specific DNA binding;GO:0001228//transcriptional activator activity, RNA polymerase II transcription regulatory region sequence-specific binding;GO:0003677//DNA binding;GO:0003700//transcription factor activity, sequence-specific DNA binding;GO:0005515//protein binding;GO:0042802//identical protein binding;GO:0043565//sequence-…	GO:0002376//immune system process;GO:0006355//regulation of transcription, DNA-templated;GO:0006357//regulation of transcription from RNA polymerase II promoter;GO:0019221//cytokine-mediated signaling pathway;GO:0032494//response to peptidoglycan;GO:0032495//response to muramyl dipeptide;GO:0043065//positive regulation of apoptotic process;GO:0045087//innate immune response;GO:0045944//positive r…
ENSMUSG00000016498	14	9	6	93	194	103	0.36	0.22	0.16	2.26	5.47	2.76	0.246666666666667	3.49666666666667	3.82534559694832	2.46381723036656e-14	1.81226189398751e-12	Pdcd1lg2	programmed cell death 1 ligand 2 [Source:MGI Symbol;Acc:MGI:1930125]	Environmental Information Processing	Signaling molecules and interaction	ko04514//Cell adhesion molecules (CAMs)	K06708	GO:0005886//plasma membrane;GO:0009897//external side of plasma membrane;GO:0009986//cell surface;GO:0016020//membrane;GO:0016021//integral component of membrane	GO:0005515//protein binding	GO:0002250//adaptive immune response;GO:0002376//immune system process;GO:0006955//immune response;GO:0007165//signal transduction;GO:0007166//cell surface receptor signaling pathway;GO:0031295//T cell costimulation;GO:0032689//negative regulation of interferon-gamma production;GO:0032693//negative regulation of interleukin-10 production;GO:0042102//positive regulation of T cell proliferation;GO:…
ENSMUSG00000013584	948	831	1003	400	397	468	17.67	15.33	19.48	7.11	8.20	9.19	17.4933333333333	8.16666666666667	-1.09898597072815	4.27407330887441e-14	3.12944134738818e-12	Aldh1a2	aldehyde dehydrogenase family 1, subfamily A2 [Source:MGI Symbol;Acc:MGI:107928]	Metabolism;Metabolism	Global and overview maps;Metabolism of cofactors and vitamins	ko01100//Metabolic pathways;ko00830//Retinol metabolism	K07249;K07249	GO:0005737//cytoplasm;GO:0005829//cytosol;GO:0048471//perinuclear region of cytoplasm	GO:0001758//retinal dehydrogenase activity;GO:0004028//3-chloroallyl aldehyde dehydrogenase activity;GO:0004029//aldehyde dehydrogenase (NAD) activity;GO:0016491//oxidoreductase activity;GO:0016620//oxidoreductase activity, acting on the aldehyde or oxo group of donors, NAD or NADP as acceptor;GO:0016918//retinal binding	GO:0001523//retinoid metabolic process;GO:0001568//blood vessel development;GO:0001822//kidney development;GO:0001889//liver development;GO:0001936//regulation of endothelial cell proliferation;GO:0001947//heart looping;GO:0002138//retinoic acid biosynthetic process;GO:0003007//heart morphogenesis;GO:0007494//midgut development;GO:0007507//heart development;GO:0008284//positive regulation of cell…
ENSMUSG00000076576	19	17	22	5983	1153	550	2.19	1.94	2.64	658.21	147.40	66.82	2.25666666666667	290.81	7.00973973634637	4.37728736417498e-14	3.17600918029619e-12	Igkv6-32	immunoglobulin kappa variable 6-32 [Source:MGI Symbol;Acc:MGI:3641634]	-	-	-	-	GO:0005615//extracellular space	-	GO:0002377//immunoglobulin production;GO:0006955//immune response
ENSMUSG00000040010	175	175	211	449	412	399	2.10	2.08	2.64	5.14	5.48	5.04	2.27333333333333	5.22	1.19924056826687	4.83133537570007e-14	3.48966048420498e-12	Slc7a5	solute carrier family 7 (cationic amino acid transporter, y+ system), member 5 [Source:MGI Symbol;Acc:MGI:1298205]	Environmental Information Processing;Human Diseases	Signal transduction;Cancers	ko04150//mTOR signaling pathway;ko05230//Central carbon metabolism in cancer	K13780;K13780	GO:0005764//lysosome;GO:0005765//lysosomal membrane;GO:0005829//cytosol;GO:0005886//plasma membrane;GO:0009925//basal plasma membrane;GO:0009986//cell surface;GO:0016020//membrane;GO:0016021//integral component of membrane;GO:0016323//basolateral plasma membrane;GO:0016324//apical plasma membrane;GO:0043231//intracellular membrane-bounded organelle;GO:0098591//external side of apical plasma membr…	GO:0015179//L-amino acid transmembrane transporter activity;GO:0015190//L-leucine transmembrane transporter activity;GO:0015196//L-tryptophan transmembrane transporter activity;GO:0022857//transmembrane transporter activity	GO:0006865//amino acid transport;GO:0015803//branched-chain amino acid transport;GO:0015804//neutral amino acid transport;GO:0015807//L-amino acid transport;GO:0055085//transmembrane transport;GO:1904556//L-tryptophan transmembrane transport
ENSMUSG00000071715	319	384	290	800	825	661	9.48	11.43	9.30	23.07	28.78	21.10	10.07	24.3166666666667	1.27188179407731	5.4967077610353e-14	3.95245331606283e-12	Ncf4	neutrophil cytosolic factor 4 [Source:MGI Symbol;Acc:MGI:109186]	Cellular Processes;Human Diseases;Organismal Systems;Organismal Systems	Transport and catabolism;Infectious diseases;Development;Immune system	ko04145//Phagosome;ko05140//Leishmaniasis;ko04380//Osteoclast differentiation;ko04670//Leukocyte transendothelial migration	K08012;K08012;K08012;K08012	GO:0005737//cytoplasm;GO:0005768//endosome;GO:0005829//cytosol;GO:0010008//endosome membrane;GO:0016020//membrane;GO:0043020//NADPH oxidase complex	GO:0005515//protein binding;GO:0008289//lipid binding;GO:0016175//superoxide-generating NADPH oxidase activity;GO:0016176//superoxide-generating NADPH oxidase activator activity;GO:0032266//phosphatidylinositol-3-phosphate binding;GO:0035091//phosphatidylinositol binding	GO:0006801//superoxide metabolic process;GO:0006909//phagocytosis;GO:0043085//positive regulation of catalytic activity;GO:0045730//respiratory burst;GO:0055114//oxidation-reduction process
ENSMUSG00000035208	244	249	163	683	1824	1221	2.98	3.06	2.07	7.49	24.38	15.90	2.70333333333333	15.9233333333333	2.55833105725399	5.68585256511878e-14	4.07020740543213e-12	Slfn8	schlafen 8 [Source:MGI Symbol;Acc:MGI:2672859]	-	-	-	-	GO:0005737//cytoplasm	GO:0000049//tRNA binding;GO:0000166//nucleotide binding;GO:0004518//nuclease activity;GO:0004519//endonuclease activity;GO:0004521//endoribonuclease activity;GO:0005524//ATP binding;GO:0008270//zinc ion binding;GO:0016787//hydrolase activity;GO:0046872//metal ion binding	GO:0002376//immune system process;GO:0016075//rRNA catabolic process;GO:0016078//tRNA catabolic process;GO:0051607//defense response to virus;GO:0090305//nucleic acid phosphodiester bond hydrolysis;GO:0090502//RNA phosphodiester bond hydrolysis, endonucleolytic
ENSMUSG00000026271	155	115	148	349	354	364	2.00	1.45	2.28	4.33	5.13	4.91	1.91	4.79	1.32645301770043	6.51733096853787e-14	4.64468453691132e-12	Gpr35	G protein-coupled receptor 35 [Source:MGI Symbol;Acc:MGI:1929509]	Environmental Information Processing	Signaling molecules and interaction	ko04080//Neuroactive ligand-receptor interaction	K04276	GO:0005623//cell;GO:0005886//plasma membrane;GO:0005887//integral component of plasma membrane;GO:0016020//membrane;GO:0016021//integral component of membrane	GO:0004930//G-protein coupled receptor activity;GO:0004950//chemokine receptor activity;GO:0016494//C-X-C chemokine receptor activity;GO:0038023//signaling receptor activity	GO:0007010//cytoskeleton organization;GO:0007165//signal transduction;GO:0007186//G-protein coupled receptor signaling pathway;GO:0007204//positive regulation of cytosolic calcium ion concentration;GO:0035025//positive regulation of Rho protein signal transduction;GO:0048246//macrophage chemotaxis;GO:0051482//positive regulation of cytosolic calcium ion concentration involved in phospholipase C-a…
ENSMUSG00000031438	84	118	127	415	679	389	1.32	1.84	2.53	6.20	11.74	6.44	1.89666666666667	8.12666666666667	2.09919756831363	6.82292331370424e-14	4.84095466085166e-12	Rnf128	ring finger protein 128 [Source:MGI Symbol;Acc:MGI:1914139]	-	-	-	-	GO:0005737//cytoplasm;GO:0005770//late endosome;GO:0005783//endoplasmic reticulum;GO:0005794//Golgi apparatus;GO:0005856//cytoskeleton;GO:0012505//endomembrane system;GO:0016020//membrane;GO:0016021//integral component of membrane;GO:0048471//perinuclear region of cytoplasm	GO:0016740//transferase activity;GO:0046872//metal ion binding;GO:0061630//ubiquitin protein ligase activity	GO:0006511//ubiquitin-dependent protein catabolic process;GO:0016567//protein ubiquitination;GO:0031647//regulation of protein stability;GO:0042036//negative regulation of cytokine biosynthetic process
ENSMUSG00000087642	1	9	0	1865	2930	1233	0.03	0.28	0.00	54.89	100.21	40.07	0.103333333333333	65.0566666666667	9.29824737935102	9.87829697774923e-14	6.94730228237759e-12	Ighe	Immunoglobulin heavy constant epsilon [Source:MGI Symbol;Acc:MGI:2685746]	Environmental Information Processing;Human Diseases;Human Diseases;Environmental Information Processing;Cellular Processes;Human Diseases;Human Diseases;Environmental Information Processing;Human Diseases;Human Diseases;Human Diseases;Environmental Information Processing;Organismal Systems;Human Diseases;Human Diseases;Organismal Systems;Organismal Systems;Human Diseases;Organismal Systems;Human …	Signal transduction;Infectious diseases;Infectious diseases;Signal transduction;Transport and catabolism;Cancers;Infectious diseases;Signal transduction;Immune diseases;Infectious diseases;Infectious diseases;Signal transduction;Immune system;Immune diseases;Cardiovascular diseases;Immune system;Immune system;Cardiovascular diseases;Immune system;Immune diseases;Infectious diseases;Immune system;…	ko04151//PI3K-Akt signaling pathway;ko05169//Epstein-Barr virus infection;ko05130//Pathogenic Escherichia coli infection;ko04020//Calcium signaling pathway;ko04145//Phagosome;ko05202//Transcriptional misregulation in cancers;ko05152//Tuberculosis;ko04072//Phospholipase D signaling pathway;ko05322//Systemic lupus erythematosus;ko05150//Staphylococcus aureus infection;ko05146//Amoebiasis;ko04064//N…	K06856;K06856;K06856;K06856;K06856;K06856;K06856;K06856;K06856;K06856;K06856;K06856;K06856;K06856;K06856;K06856;K06856;K06856;K06856;K06856;K06856;K06856;K06856;K06856;K06856;K06856;K06856	-	-	-
ENSMUSG00000043110	645	627	707	257	168	287	7.33	7.05	8.36	2.79	2.11	3.44	7.58	2.78	-1.44711296544758	1.06255408157678e-13	7.43755918486719e-12	Lrrn4	leucine rich repeat neuronal 4 [Source:MGI Symbol;Acc:MGI:2445154]	-	-	-	-	GO:0005887//integral component of plasma membrane;GO:0016020//membrane;GO:0016021//integral component of membrane	GO:0003674//molecular_function;GO:0005515//protein binding	GO:0007616//long-term memory;GO:0008542//visual learning
ENSMUSG00000025473	542	512	538	1978	2379	1160	7.36	6.89	7.65	28.69	37.28	16.62	7.3	27.53	1.91503624082818	1.06681547397534e-13	7.43755918486719e-12	Adam8	a disintegrin and metallopeptidase domain 8 [Source:MGI Symbol;Acc:MGI:107825]	-	-	-	-	GO:0002102//podosome;GO:0005737//cytoplasm;GO:0005886//plasma membrane;GO:0005887//integral component of plasma membrane;GO:0009986//cell surface;GO:0016020//membrane;GO:0016021//integral component of membrane;GO:0032010//phagolysosome;GO:0032127//dense core granule membrane;GO:0042581//specific granule;GO:0070820//tertiary granule;GO:0071065//alpha9-beta1 integrin-vascular cell adhesion molecule…	GO:0004222//metalloendopeptidase activity;GO:0005178//integrin binding;GO:0005509//calcium ion binding;GO:0005515//protein binding;GO:0008233//peptidase activity;GO:0008237//metallopeptidase activity;GO:0008270//zinc ion binding;GO:0016787//hydrolase activity;GO:0046872//metal ion binding;GO:0050839//cell adhesion molecule binding	GO:0000902//cell morphogenesis;GO:0001525//angiogenesis;GO:0002523//leukocyte migration involved in inflammatory response;GO:0002675//positive regulation of acute inflammatory response;GO:0002693//positive regulation of cellular extravasation;GO:0006508//proteolysis;GO:0006954//inflammatory response;GO:0007160//cell-matrix adhesion;GO:0022407//regulation of cell-cell adhesion;GO:0033089//positive…
ENSMUSG00000032649	904	1038	848	477	386	500	9.39	10.68	9.22	4.74	4.41	5.49	9.76333333333333	4.88	-1.00049263959532	1.0967786330444e-13	7.61335297873026e-12	Colgalt2	collagen beta(1-O)galactosyltransferase 2 [Source:MGI Symbol;Acc:MGI:2138232]	Metabolism;Metabolism;Metabolism	Global and overview maps;Amino acid metabolism;Glycan biosynthesis and metabolism	ko01100//Metabolic pathways;ko00310//Lysine degradation;ko00514//Other types of O-glycan biosynthesis	K11703;K11703;K11703	GO:0005575//cellular_component;GO:0005783//endoplasmic reticulum;GO:0005788//endoplasmic reticulum lumen	GO:0016740//transferase activity;GO:0016757//transferase activity, transferring glycosyl groups;GO:0050211//procollagen galactosyltransferase activity	GO:0008150//biological_process
ENSMUSG00000024516	424	452	406	937	945	749	21.07	22.10	20.97	44.77	51.75	39.88	21.38	45.4666666666667	1.08854738546989	1.12058839457632e-13	7.74510125303072e-12	Sec11c	SEC11 homolog C, signal peptidase complex subunit [Source:MGI Symbol;Acc:MGI:1913536]	Genetic Information Processing	Folding, sorting and degradation	ko03060//Protein export	K13280	GO:0005783//endoplasmic reticulum;GO:0005787//signal peptidase complex;GO:0005789//endoplasmic reticulum membrane;GO:0016020//membrane;GO:0016021//integral component of membrane;GO:0031090//organelle membrane;GO:0043231//intracellular membrane-bounded organelle	GO:0008233//peptidase activity;GO:0008236//serine-type peptidase activity;GO:0016787//hydrolase activity	GO:0006465//signal peptide processing;GO:0006508//proteolysis
ENSMUSG00000025140	30	20	21	114	118	110	0.66	0.65	0.58	2.57	2.93	2.89	0.63	2.79666666666667	2.15028457621875	1.13506673204216e-13	7.8115000207279e-12	Pycr1	pyrroline-5-carboxylate reductase 1 [Source:MGI Symbol;Acc:MGI:2384795]	Metabolism;Metabolism;Metabolism	Global and overview maps;Global and overview maps;Amino acid metabolism	ko01100//Metabolic pathways;ko01230//Biosynthesis of amino acids;ko00330//Arginine and proline metabolism	K00286;K00286;K00286	GO:0005739//mitochondrion	GO:0004735//pyrroline-5-carboxylate reductase activity;GO:0016491//oxidoreductase activity;GO:0042802//identical protein binding	GO:0006561//proline biosynthetic process;GO:0008652//cellular amino acid biosynthetic process;GO:0034599//cellular response to oxidative stress;GO:0051881//regulation of mitochondrial membrane potential;GO:0055114//oxidation-reduction process;GO:0055129//L-proline biosynthetic process;GO:1903206//negative regulation of hydrogen peroxide-induced cell death
ENSMUSG00000022901	131	156	109	327	373	411	2.65	3.27	3.02	7.76	10.72	10.13	2.98	9.53666666666667	1.67817276113987	1.25475485039135e-13	8.56169958554271e-12	Cd86	CD86 antigen [Source:MGI Symbol;Acc:MGI:101773]	Human Diseases;Human Diseases;Human Diseases;Human Diseases;Human Diseases;Human Diseases;Human Diseases;Environmental Information Processing;Organismal Systems;Organismal Systems;Human Diseases;Human Diseases	Cancers;Immune diseases;Immune diseases;Infectious diseases;Cardiovascular diseases;Immune diseases;Immune diseases;Signaling molecules and interaction;Immune system;Immune system;Endocrine and metabolic diseases;Immune diseases	ko05202//Transcriptional misregulation in cancers;ko05322//Systemic lupus erythematosus;ko05323//Rheumatoid arthritis;ko05167//Kaposi sarcoma-associated herpesvirus infection;ko05416//Viral myocarditis;ko05320//Autoimmune thyroid disease;ko05330//Allograft rejection;ko04514//Cell adhesion molecules (CAMs);ko04672//Intestinal immune network for IgA production;ko04620//Toll-like receptor signaling …	K05413;K05413;K05413;K05413;K05413;K05413;K05413;K05413;K05413;K05413;K05413;K05413	GO:0005886//plasma membrane;GO:0009897//external side of plasma membrane;GO:0009986//cell surface;GO:0016020//membrane;GO:0016021//integral component of membrane;GO:0043231//intracellular membrane-bounded organelle;GO:0070062//extracellular exosome	GO:0005102//receptor binding	GO:0002224//toll-like receptor signaling pathway;GO:0002250//adaptive immune response;GO:0002376//immune system process;GO:0002668//negative regulation of T cell anergy;GO:0006955//immune response;GO:0007165//signal transduction;GO:0007166//cell surface receptor signaling pathway;GO:0031295//T cell costimulation;GO:0034138//toll-like receptor 3 signaling pathway;GO:0042102//positive regulation of…
ENSMUSG00000020901	749	540	581	1596	1436	1213	8.55	8.07	8.32	18.94	17.67	14.84	8.31333333333333	17.15	1.04470961195166	1.72299333392569e-13	1.16574675567504e-11	Pik3r5	phosphoinositide-3-kinase regulatory subunit 5 [Source:MGI Symbol;Acc:MGI:2443588]	Environmental Information Processing;Environmental Information Processing;Human Diseases;Organismal Systems;Environmental Information Processing;Organismal Systems;Organismal Systems;Environmental Information Processing;Organismal Systems;Organismal Systems;Human Diseases	Signal transduction;Signal transduction;Infectious diseases;Immune system;Signal transduction;Endocrine system;Circulatory system;Signal transduction;Immune system;Nervous system;Infectious diseases	ko04151//PI3K-Akt signaling pathway;ko04072//Phospholipase D signaling pathway;ko05167//Kaposi sarcoma-associated herpesvirus infection;ko04062//Chemokine signaling pathway;ko04022//cGMP - PKG signaling pathway;ko04921//Oxytocin signaling pathway;ko04261//Adrenergic signaling in cardiomyocytes;ko04371//Apelin signaling pathway;ko04611//Platelet activation;ko04725//Cholinergic synapse;ko05145//Tox…	K21290;K21290;K21290;K21290;K21290;K21290;K21290;K21290;K21290;K21290;K21290	GO:0005634//nucleus;GO:0005737//cytoplasm;GO:0005829//cytosol;GO:0005886//plasma membrane;GO:0005942//phosphatidylinositol 3-kinase complex;GO:0005944//phosphatidylinositol 3-kinase complex, class IB;GO:0016020//membrane;GO:0034451//centriolar satellite	GO:0016301//kinase activity;GO:0031683//G-protein beta/gamma-subunit complex binding;GO:0046935//1-phosphatidylinositol-3-kinase regulator activity	GO:0007186//G-protein coupled receptor signaling pathway;GO:0014065//phosphatidylinositol 3-kinase signaling;GO:0016310//phosphorylation;GO:0043406//positive regulation of MAP kinase activity;GO:0043551//regulation of phosphatidylinositol 3-kinase activity;GO:0051897//positive regulation of protein kinase B signaling
ENSMUSG00000022303	5	3	1	57	147	87	0.13	0.07	0.03	1.28	3.57	2.42	0.0766666666666667	2.42333333333333	4.98224959786258	1.91593544434187e-13	1.29084138025302e-11	Dcstamp	dendrocyte expressed seven transmembrane protein [Source:MGI Symbol;Acc:MGI:1923016]	-	-	-	-	GO:0005768//endosome;GO:0005783//endoplasmic reticulum;GO:0005789//endoplasmic reticulum membrane;GO:0005886//plasma membrane;GO:0009986//cell surface;GO:0010008//endosome membrane;GO:0016020//membrane;GO:0016021//integral component of membrane;GO:0030176//integral component of endoplasmic reticulum membrane;GO:0033116//endoplasmic reticulum-Golgi intermediate compartment membrane	-	GO:0002376//immune system process;GO:0030154//cell differentiation;GO:0030308//negative regulation of cell growth;GO:0030316//osteoclast differentiation;GO:0034241//positive regulation of macrophage fusion;GO:0036006//cellular response to macrophage colony-stimulating factor stimulus;GO:0043011//myeloid dendritic cell differentiation;GO:0045657//positive regulation of monocyte differentiation;GO:…
ENSMUSG00000010142	164	273	164	614	575	556	3.43	5.36	5.56	17.03	17.06	18.33	4.78333333333333	17.4733333333333	1.86906661676537	3.28132137934584e-13	2.18323602978467e-11	Tnfrsf13b	tumor necrosis factor receptor superfamily, member 13b [Source:MGI Symbol;Acc:MGI:1889411]	Environmental Information Processing;Organismal Systems;Human Diseases	Signaling molecules and interaction;Immune system;Immune diseases	ko04060//Cytokine-cytokine receptor interaction;ko04672//Intestinal immune network for IgA production;ko05340//Primary immunodeficiency	K05150;K05150;K05150	GO:0005887//integral component of plasma membrane;GO:0009897//external side of plasma membrane;GO:0016020//membrane;GO:0016021//integral component of membrane	-	GO:0001782//B cell homeostasis;GO:0002244//hematopoietic progenitor cell differentiation;GO:0002250//adaptive immune response;GO:0002376//immune system process;GO:0030889//negative regulation of B cell proliferation
ENSMUSG00000095429	3	4	6	186	83	53	0.36	0.47	0.75	21.17	11.00	6.74	0.526666666666667	12.97	4.62214451679575	4.07299450068192e-13	2.69877962059647e-11	Ighv5-12	immunoglobulin heavy variable 5-12 [Source:MGI Symbol;Acc:MGI:4439516]	Environmental Information Processing;Human Diseases;Human Diseases;Environmental Information Processing;Cellular Processes;Human Diseases;Human Diseases;Environmental Information Processing;Human Diseases;Human Diseases;Human Diseases;Environmental Information Processing;Organismal Systems;Human Diseases;Human Diseases;Organismal Systems;Organismal Systems;Human Diseases;Organismal Systems;Human …	Signal transduction;Infectious diseases;Infectious diseases;Signal transduction;Transport and catabolism;Cancers;Infectious diseases;Signal transduction;Immune diseases;Infectious diseases;Infectious diseases;Signal transduction;Immune system;Immune diseases;Cardiovascular diseases;Immune system;Immune system;Cardiovascular diseases;Immune system;Immune diseases;Infectious diseases;Immune system;…	ko04151//PI3K-Akt signaling pathway;ko05169//Epstein-Barr virus infection;ko05130//Pathogenic Escherichia coli infection;ko04020//Calcium signaling pathway;ko04145//Phagosome;ko05202//Transcriptional misregulation in cancers;ko05152//Tuberculosis;ko04072//Phospholipase D signaling pathway;ko05322//Systemic lupus erythematosus;ko05150//Staphylococcus aureus infection;ko05146//Amoebiasis;ko04064//N…	K06856;K06856;K06856;K06856;K06856;K06856;K06856;K06856;K06856;K06856;K06856;K06856;K06856;K06856;K06856;K06856;K06856;K06856;K06856;K06856;K06856;K06856;K06856;K06856;K06856;K06856;K06856	GO:0009897//external side of plasma membrane;GO:0042571//immunoglobulin complex, circulating	GO:0003823//antigen binding;GO:0034987//immunoglobulin receptor binding	GO:0006910//phagocytosis, recognition;GO:0006911//phagocytosis, engulfment;GO:0006958//complement activation, classical pathway;GO:0042742//defense response to bacterium;GO:0045087//innate immune response;GO:0050853//B cell receptor signaling pathway;GO:0050871//positive regulation of B cell activation
ENSMUSG00000095737	13	9	5	424	198	58	1.55	1.07	0.62	48.36	26.25	7.31	1.08	27.3066666666667	4.66014999711538	5.29618143837406e-13	3.45220607172066e-11	Igkv11-125	immunoglobulin kappa variable 11-125 [Source:MGI Symbol;Acc:MGI:3642338]	-	-	-	-	-	-	-
ENSMUSG00000031981	1	0	4	65	167	81	0.02	0.00	0.08	1.12	3.35	1.55	0.0333333333333333	2.00666666666667	5.91169158187234	5.97299622810298e-13	3.87761111407414e-11	Capn9	calpain 9 [Source:MGI Symbol;Acc:MGI:1920897]	-	-	-	-	GO:0005737//cytoplasm	GO:0004198//calcium-dependent cysteine-type endopeptidase activity;GO:0005509//calcium ion binding;GO:0016787//hydrolase activity;GO:0046872//metal ion binding	GO:0006508//proteolysis;GO:0045214//sarcomere organization
ENSMUSG00000005142	3770	3558	3488	6825	8116	6220	42.91	40.10	41.14	74.33	103.02	74.69	41.3833333333333	84.0133333333333	1.02156845325066	6.761305259275e-13	4.35411766395481e-11	Man2b1	mannosidase 2, alpha B1 [Source:MGI Symbol;Acc:MGI:107286]	Cellular Processes;Metabolism	Transport and catabolism;Glycan biosynthesis and metabolism	ko04142//Lysosome;ko00511//Other glycan degradation	K12311;K12311	GO:0005615//extracellular space;GO:0005764//lysosome;GO:0005774//vacuolar membrane;GO:0016020//membrane;GO:0016021//integral component of membrane	GO:0003824//catalytic activity;GO:0004559//alpha-mannosidase activity;GO:0005537//mannose binding;GO:0016787//hydrolase activity;GO:0016798//hydrolase activity, acting on glycosyl bonds;GO:0030246//carbohydrate binding;GO:0046872//metal ion binding	GO:0005975//carbohydrate metabolic process;GO:0006013//mannose metabolic process;GO:0006464//cellular protein modification process;GO:0006517//protein deglycosylation;GO:0007611//learning or memory;GO:0008152//metabolic process
ENSMUSG00000076522	12	22	17	509	6438	1511	1.34	2.43	1.98	54.22	796.93	177.74	1.91666666666667	342.963333333333	7.48331107863343	6.92334094267157e-13	4.44063088062954e-11	Igkv16-104	immunoglobulin kappa variable 16-104 [Source:MGI Symbol;Acc:MGI:2685913]	-	-	-	-	GO:0005615//extracellular space	-	GO:0002377//immunoglobulin production;GO:0006955//immune response
ENSMUSG00000095609	32	43	30	124	177	194	0.81	1.07	0.79	3.00	4.96	5.18	0.89	4.38	2.29905362863478	8.23138505439706e-13	5.23770870425622e-11	Gm21188	predicted gene, 21188 [Source:MGI Symbol;Acc:MGI:5434543]	-	-	-	-	-	GO:0038023//signaling receptor activity	-
ENSMUSG00000036322	5758	5587	4054	9822	10184	10708	245.50	239.28	176.74	403.45	477.76	480.12	220.506666666667	453.776666666667	1.04116015308137	8.59803519357057e-13	5.44938712762467e-11	H2-Ea	histocompatibility 2, class II antigen E alpha [Source:MGI Symbol;Acc:MGI:95900]	Human Diseases;Human Diseases;Cellular Processes;Human Diseases;Human Diseases;Human Diseases;Human Diseases;Human Diseases;Organismal Systems;Human Diseases;Human Diseases;Human Diseases;Human Diseases;Human Diseases;Environmental Information Processing;Organismal Systems;Human Diseases;Human Diseases;Organismal Systems;Organismal Systems;Organismal Systems;Human Diseases;Human Diseases;Human Di…	Infectious diseases;Infectious diseases;Transport and catabolism;Infectious diseases;Immune diseases;Infectious diseases;Infectious diseases;Immune diseases;Immune system;Cardiovascular diseases;Immune diseases;Infectious diseases;Infectious diseases;Immune diseases;Signaling molecules and interaction;Immune system;Immune diseases;Infectious diseases;Immune system;Immune system;Immune system;Endo…	ko05168//Herpes simplex infection;ko05169//Epstein-Barr virus infection;ko04145//Phagosome;ko05152//Tuberculosis;ko05322//Systemic lupus erythematosus;ko05150//Staphylococcus aureus infection;ko05166//HTLV-I infection;ko05323//Rheumatoid arthritis;ko04640//Hematopoietic cell lineage;ko05416//Viral myocarditis;ko05320//Autoimmune thyroid disease;ko05140//Leishmaniasis;ko05164//Influenza A;ko05330/…	K06752;K06752;K06752;K06752;K06752;K06752;K06752;K06752;K06752;K06752;K06752;K06752;K06752;K06752;K06752;K06752;K06752;K06752;K06752;K06752;K06752;K06752;K06752;K06752	GO:0005764//lysosome;GO:0005765//lysosomal membrane;GO:0005886//plasma membrane;GO:0009986//cell surface;GO:0016020//membrane;GO:0016021//integral component of membrane;GO:0031902//late endosome membrane;GO:0042613//MHC class II protein complex	GO:0030247//polysaccharide binding;GO:0042605//peptide antigen binding	GO:0002503//peptide antigen assembly with MHC class II protein complex;GO:0002504//antigen processing and presentation of peptide or polysaccharide antigen via MHC class II;GO:0006955//immune response;GO:0019882//antigen processing and presentation;GO:0050890//cognition
ENSMUSG00000105547	30	38	25	131	154	118	2.80	3.51	2.43	11.67	15.94	11.61	2.91333333333333	13.0733333333333	2.16588435069155	9.86251023177252e-13	6.2261949435619e-11	Iglc3	immunoglobulin lambda constant 3 [Source:MGI Symbol;Acc:MGI:99886]	Human Diseases	Immune diseases	ko05340//Primary immunodeficiency	K06554	-	-	-
ENSMUSG00000033355	429	407	372	909	1953	1901	15.32	14.27	13.75	30.99	77.73	71.42	14.4466666666667	60.0466666666667	2.05534750800905	1.17266307919303e-12	7.37398136269026e-11	Rtp4	receptor transporter protein 4 [Source:MGI Symbol;Acc:MGI:1915025]	-	-	-	-	GO:0005737//cytoplasm;GO:0016020//membrane;GO:0016021//integral component of membrane	GO:0005515//protein binding;GO:0031849//olfactory receptor binding	GO:0001580//detection of chemical stimulus involved in sensory perception of bitter taste;GO:0006612//protein targeting to membrane;GO:0051205//protein insertion into membrane;GO:0051607//defense response to virus
ENSMUSG00000010651	166	222	159	52	21	37	4.14	5.48	4.15	1.25	0.59	0.98	4.59	0.94	-2.28776149173617	1.34706300721721e-12	8.43756067215936e-11	Acaa1b	acetyl-Coenzyme A acyltransferase 1B [Source:MGI Symbol;Acc:MGI:3605455]	Metabolism;Organismal Systems;Cellular Processes;Metabolism;Metabolism;Metabolism;Metabolism;Metabolism	Global and overview maps;Endocrine system;Transport and catabolism;Global and overview maps;Amino acid metabolism;Lipid metabolism;Lipid metabolism;Lipid metabolism	ko01100//Metabolic pathways;ko03320//PPAR signaling pathway;ko04146//Peroxisome;ko01212//Fatty acid metabolism;ko00280//Valine, leucine and isoleucine degradation;ko00071//Fatty acid degradation;ko01040//Biosynthesis of unsaturated fatty acids;ko00592//alpha-Linolenic acid metabolism	K07513;K07513;K07513;K07513;K07513;K07513;K07513;K07513	GO:0005739//mitochondrion;GO:0005777//peroxisome	GO:0003824//catalytic activity;GO:0003985//acetyl-CoA C-acetyltransferase activity;GO:0003988//acetyl-CoA C-acyltransferase activity;GO:0016740//transferase activity;GO:0016746//transferase activity, transferring acyl groups;GO:0016747//transferase activity, transferring acyl groups other than amino-acyl groups;GO:0050633//acetyl-CoA C-myristoyltransferase activity	GO:0006629//lipid metabolic process;GO:0006631//fatty acid metabolic process;GO:0006635//fatty acid beta-oxidation;GO:0010124//phenylacetate catabolic process
ENSMUSG00000025498	550	592	575	2672	7019	7342	12.24	13.03	14.03	56.36	173.73	172.98	13.1	134.356666666667	3.35842919158638	1.40428416264566e-12	8.76174962958101e-11	Irf7	interferon regulatory factor 7 [Source:MGI Symbol;Acc:MGI:1859212]	Human Diseases;Human Diseases;Human Diseases;Organismal Systems;Human Diseases;Human Diseases;Human Diseases;Human Diseases;Human Diseases;Organismal Systems;Organismal Systems;Organismal Systems	Infectious diseases;Infectious diseases;Cancers;Immune system;Infectious diseases;Infectious diseases;Infectious diseases;Infectious diseases;Infectious diseases;Immune system;Immune system;Immune system	ko05168//Herpes simplex infection;ko05169//Epstein-Barr virus infection;ko05203//Viral carcinogenesis;ko04621//NOD-like receptor signaling pathway;ko05167//Kaposi sarcoma-associated herpesvirus infection;ko05164//Influenza A;ko05160//Hepatitis C;ko05161//Hepatitis B;ko05162//Measles;ko04620//Toll-like receptor signaling pathway;ko04622//RIG-I-like receptor signaling pathway;ko04623//Cytosolic DNA…	K09447;K09447;K09447;K09447;K09447;K09447;K09447;K09447;K09447;K09447;K09447;K09447	GO:0005634//nucleus;GO:0005654//nucleoplasm;GO:0005737//cytoplasm;GO:0005829//cytosol	GO:0000978//RNA polymerase II core promoter proximal region sequence-specific DNA binding;GO:0000981//RNA polymerase II transcription factor activity, sequence-specific DNA binding;GO:0000987//core promoter proximal region sequence-specific DNA binding;GO:0003677//DNA binding;GO:0003700//transcription factor activity, sequence-specific DNA binding;GO:0005515//protein binding;GO:0044212//transcrip…	GO:0002376//immune system process;GO:0002819//regulation of adaptive immune response;GO:0006355//regulation of transcription, DNA-templated;GO:0010468//regulation of gene expression;GO:0016064//immunoglobulin mediated immune response;GO:0032481//positive regulation of type I interferon production;GO:0032607//interferon-alpha production;GO:0032608//interferon-beta production;GO:0032727//positive r…
ENSMUSG00000004207	22048	21910	18781	51056	65508	39449	351.66	346.09	312.00	777.43	1159.45	663.49	336.583333333333	866.79	1.36471876920774	1.54576991739401e-12	9.60713977729182e-11	Psap	prosaposin [Source:MGI Symbol;Acc:MGI:97783]	Cellular Processes	Transport and catabolism	ko04142//Lysosome	K12382	GO:0005576//extracellular region;GO:0005615//extracellular space;GO:0005737//cytoplasm;GO:0005739//mitochondrion;GO:0005764//lysosome;GO:0005770//late endosome;GO:0016235//aggresome;GO:0032991//macromolecular complex;GO:0043231//intracellular membrane-bounded organelle	GO:0001664//G-protein coupled receptor binding;GO:0002020//protease binding;GO:0004565//beta-galactosidase activity;GO:0005515//protein binding;GO:0005543//phospholipid binding;GO:0030882//lipid antigen binding;GO:0042802//identical protein binding;GO:0042803//protein homodimerization activity	GO:0001865//NK T cell differentiation;GO:0003335//corneocyte development;GO:0006629//lipid metabolic process;GO:0006643//membrane lipid metabolic process;GO:0006664//glycolipid metabolic process;GO:0006665//sphingolipid metabolic process;GO:0006672//ceramide metabolic process;GO:0006678//glucosylceramide metabolic process;GO:0006683//galactosylceramide catabolic process;GO:0006886//intracellular …
ENSMUSG00000024810	1420	1105	1350	3279	2748	2268	23.94	18.70	24.18	53.24	52.36	39.97	22.2733333333333	48.5233333333333	1.12336117852912	1.75463536469377e-12	1.08631575570906e-10	Il33	interleukin 33 [Source:MGI Symbol;Acc:MGI:1924375]	Environmental Information Processing;Human Diseases;Cellular Processes;Organismal Systems	Signaling molecules and interaction;Infectious diseases;Cell growth and death;Immune system	ko04060//Cytokine-cytokine receptor interaction;ko05164//Influenza A;ko04217//Necroptosis;ko04623//Cytosolic DNA-sensing pathway	K12967;K12967;K12967;K12967	GO:0005576//extracellular region;GO:0005615//extracellular space;GO:0005634//nucleus;GO:0005694//chromosome;GO:0005720//nuclear heterochromatin;GO:0005737//cytoplasm;GO:0030133//transport vesicle;GO:0031410//cytoplasmic vesicle	GO:0002112//interleukin-33 receptor binding;GO:0005125//cytokine activity;GO:0005515//protein binding	GO:0000122//negative regulation of transcription from RNA polymerase II promoter;GO:0001819//positive regulation of cytokine production;GO:0002281//macrophage activation involved in immune response;GO:0002282//microglial cell activation involved in immune response;GO:0002686//negative regulation of leukocyte migration;GO:0002826//negative regulation of T-helper 1 type immune response;GO:0002830//…
ENSMUSG00000094356	10	6	5	153	1402	2763	1.14	0.68	0.59	16.65	177.30	332.04	0.803333333333333	175.33	7.76985841491397	1.81825766890509e-12	1.12074948249815e-10	Igkv8-28	immunoglobulin kappa variable 8-28 [Source:MGI Symbol;Acc:MGI:3642251]	-	-	-	-	GO:0005615//extracellular space	-	GO:0002377//immunoglobulin production;GO:0006955//immune response
ENSMUSG00000028327	25	25	24	171	315	111	0.29	0.29	0.36	1.88	4.37	1.42	0.313333333333333	2.55666666666667	3.0284939158253	1.8737326797781e-12	1.14676730993289e-10	Stra6l	STRA6-like [Source:MGI Symbol;Acc:MGI:1921402]	-	-	-	-	GO:0005886//plasma membrane;GO:0016020//membrane;GO:0016021//integral component of membrane	GO:0005515//protein binding	GO:0034633//retinol transport;GO:0071939//vitamin A import
ENSMUSG00000021939	12873	12814	12655	28072	36098	23328	114.50	112.87	117.30	238.31	356.11	218.70	114.89	271.04	1.23825254818906	1.92019883642712e-12	1.17073719931973e-10	Ctsb	cathepsin B [Source:MGI Symbol;Acc:MGI:88561]	Organismal Systems;Cellular Processes;Cellular Processes;Cellular Processes;Organismal Systems;Organismal Systems	Immune system;Cell growth and death;Transport and catabolism;Transport and catabolism;Immune system;Endocrine system	ko04621//NOD-like receptor signaling pathway;ko04210//Apoptosis;ko04140//Autophagy - animal;ko04142//Lysosome;ko04612//Antigen processing and presentation;ko04924//Renin secretion	K01363;K01363;K01363;K01363;K01363;K01363	GO:0005576//extracellular region;GO:0005615//extracellular space;GO:0005730//nucleolus;GO:0005737//cytoplasm;GO:0005739//mitochondrion;GO:0005764//lysosome;GO:0005886//plasma membrane;GO:0005901//caveola;GO:0009897//external side of plasma membrane;GO:0009986//cell surface;GO:0016020//membrane;GO:0016324//apical plasma membrane;GO:0042383//sarcolemma;GO:0042470//melanosome;GO:0043231//intracellul…	GO:0004175//endopeptidase activity;GO:0004197//cysteine-type endopeptidase activity;GO:0005518//collagen binding;GO:0008233//peptidase activity;GO:0008234//cysteine-type peptidase activity;GO:0016787//hydrolase activity;GO:0030984//kininogen binding;GO:0042277//peptide binding;GO:0043394//proteoglycan binding;GO:0043621//protein self-association;GO:0044877//macromolecular complex binding	GO:0006508//proteolysis;GO:0006590//thyroid hormone generation;GO:0030574//collagen catabolic process;GO:0030855//epithelial cell differentiation;GO:0046697//decidualization;GO:0046718//viral entry into host cell;GO:0050790//regulation of catalytic activity;GO:0051603//proteolysis involved in cellular protein catabolic process;GO:0060548//negative regulation of cell death;GO:0097067//cellular res…
ENSMUSG00000018168	809	892	666	1577	1716	1441	13.93	13.65	11.16	22.98	30.64	24.07	12.9133333333333	25.8966666666667	1.00390495770516	2.24951286552056e-12	1.36632343934175e-10	Ikzf3	IKAROS family zinc finger 3 [Source:MGI Symbol;Acc:MGI:1342542]	-	-	-	-	GO:0005634//nucleus;GO:0005654//nucleoplasm;GO:0005737//cytoplasm;GO:0005829//cytosol;GO:0005886//plasma membrane	GO:0000977//RNA polymerase II regulatory region sequence-specific DNA binding;GO:0001228//transcriptional activator activity, RNA polymerase II transcription regulatory region sequence-specific binding;GO:0003676//nucleic acid binding;GO:0003677//DNA binding;GO:0003700//transcription factor activity, sequence-specific DNA binding;GO:0005515//protein binding;GO:0042802//identical protein binding;G…	GO:0009617//response to bacterium;GO:0030888//regulation of B cell proliferation;GO:0042113//B cell activation;GO:0042981//regulation of apoptotic process;GO:0045577//regulation of B cell differentiation;GO:0045619//regulation of lymphocyte differentiation;GO:0045944//positive regulation of transcription from RNA polymerase II promoter
ENSMUSG00000041202	157	102	80	419	632	393	3.76	2.64	2.37	11.18	19.13	10.92	2.92333333333333	13.7433333333333	2.23304571344333	2.60937268217933e-12	1.56708954901669e-10	Pla2g2d	phospholipase A2, group IID [Source:MGI Symbol;Acc:MGI:1341796]	Metabolism;Environmental Information Processing;Organismal Systems;Organismal Systems;Metabolism;Metabolism;Metabolism;Metabolism;Organismal Systems;Metabolism	Global and overview maps;Signal transduction;Circulatory system;Digestive system;Lipid metabolism;Lipid metabolism;Lipid metabolism;Lipid metabolism;Digestive system;Lipid metabolism	ko01100//Metabolic pathways;ko04014//Ras signaling pathway;ko04270//Vascular smooth muscle contraction;ko04972//Pancreatic secretion;ko00564//Glycerophospholipid metabolism;ko00590//Arachidonic acid metabolism;ko00591//Linoleic acid metabolism;ko00565//Ether lipid metabolism;ko04975//Fat digestion and absorption;ko00592//alpha-Linolenic acid metabolism	K01047;K01047;K01047;K01047;K01047;K01047;K01047;K01047;K01047;K01047	GO:0005576//extracellular region;GO:0005737//cytoplasm	GO:0004623//phospholipase A2 activity;GO:0005509//calcium ion binding;GO:0005543//phospholipid binding;GO:0008201//heparin binding;GO:0016787//hydrolase activity;GO:0043395//heparan sulfate proteoglycan binding;GO:0046872//metal ion binding;GO:0047498//calcium-dependent phospholipase A2 activity	GO:0002361//CD4-positive, CD25-positive, alpha-beta regulatory T cell differentiation;GO:0006629//lipid metabolic process;GO:0006644//phospholipid metabolic process;GO:0016042//lipid catabolic process;GO:0042130//negative regulation of T cell proliferation;GO:0050482//arachidonic acid secretion;GO:0050868//negative regulation of T cell activation
ENSMUSG00000056888	216	283	275	581	752	619	8.56	11.29	12.34	22.57	32.85	26.85	10.73	27.4233333333333	1.35375386669263	2.6330284573046e-12	1.57539594451042e-10	Glipr1	GLI pathogenesis-related 1 (glioma) [Source:MGI Symbol;Acc:MGI:1920940]	-	-	-	-	GO:0005576//extracellular region;GO:0005615//extracellular space;GO:0016020//membrane;GO:0016021//integral component of membrane	-	-
ENSMUSG00000095442	5	3	1	202	1434	315	0.61	0.40	0.16	23.22	191.20	39.91	0.39	84.7766666666667	7.7640493079889	3.0134211822418e-12	1.79629028465603e-10	Ighv1-4	immunoglobulin heavy variable 1-4 [Source:MGI Symbol;Acc:MGI:4439618]	Environmental Information Processing;Human Diseases;Human Diseases;Environmental Information Processing;Cellular Processes;Human Diseases;Human Diseases;Environmental Information Processing;Human Diseases;Human Diseases;Human Diseases;Environmental Information Processing;Organismal Systems;Human Diseases;Human Diseases;Organismal Systems;Organismal Systems;Human Diseases;Organismal Systems;Human …	Signal transduction;Infectious diseases;Infectious diseases;Signal transduction;Transport and catabolism;Cancers;Infectious diseases;Signal transduction;Immune diseases;Infectious diseases;Infectious diseases;Signal transduction;Immune system;Immune diseases;Cardiovascular diseases;Immune system;Immune system;Cardiovascular diseases;Immune system;Immune diseases;Infectious diseases;Immune system;…	ko04151//PI3K-Akt signaling pathway;ko05169//Epstein-Barr virus infection;ko05130//Pathogenic Escherichia coli infection;ko04020//Calcium signaling pathway;ko04145//Phagosome;ko05202//Transcriptional misregulation in cancers;ko05152//Tuberculosis;ko04072//Phospholipase D signaling pathway;ko05322//Systemic lupus erythematosus;ko05150//Staphylococcus aureus infection;ko05146//Amoebiasis;ko04064//N…	K06856;K06856;K06856;K06856;K06856;K06856;K06856;K06856;K06856;K06856;K06856;K06856;K06856;K06856;K06856;K06856;K06856;K06856;K06856;K06856;K06856;K06856;K06856;K06856;K06856;K06856;K06856	GO:0009897//external side of plasma membrane;GO:0042571//immunoglobulin complex, circulating	GO:0003823//antigen binding;GO:0034987//immunoglobulin receptor binding	GO:0006910//phagocytosis, recognition;GO:0006911//phagocytosis, engulfment;GO:0006958//complement activation, classical pathway;GO:0042742//defense response to bacterium;GO:0045087//innate immune response;GO:0050853//B cell receptor signaling pathway;GO:0050871//positive regulation of B cell activation
ENSMUSG00000030162	198	230	183	471	557	431	2.34	2.69	3.19	6.36	7.78	6.41	2.74	6.85	1.32192809488736	3.42778787665985e-12	2.03572513341632e-10	Olr1	oxidized low density lipoprotein (lectin-like) receptor 1 [Source:MGI Symbol;Acc:MGI:1261434]	Cellular Processes;Organismal Systems	Transport and catabolism;Endocrine system	ko04145//Phagosome;ko03320//PPAR signaling pathway	K08763;K08763	GO:0005576//extracellular region;GO:0005654//nucleoplasm;GO:0005886//plasma membrane;GO:0016020//membrane;GO:0016021//integral component of membrane;GO:0019897//extrinsic component of plasma membrane;GO:0043231//intracellular membrane-bounded organelle;GO:0043235//receptor complex;GO:0045121//membrane raft	GO:0005041//low-density lipoprotein receptor activity;GO:0030246//carbohydrate binding;GO:0042802//identical protein binding	GO:0002376//immune system process;GO:0006897//endocytosis;GO:0006954//inflammatory response;GO:0007155//cell adhesion;GO:0007159//leukocyte cell-cell adhesion;GO:0008219//cell death;GO:0010629//negative regulation of gene expression;GO:0042157//lipoprotein metabolic process
ENSMUSG00000022769	337	239	309	716	855	662	12.83	9.01	12.26	26.02	36.11	26.57	11.3666666666667	29.5666666666667	1.37916236527689	3.48825522375721e-12	2.06399160564379e-10	Sdf2l1	stromal cell-derived factor 2-like 1 [Source:MGI Symbol;Acc:MGI:2149842]	-	-	-	-	GO:0005783//endoplasmic reticulum;GO:0005788//endoplasmic reticulum lumen;GO:0005789//endoplasmic reticulum membrane;GO:0016020//membrane;GO:0034663//endoplasmic reticulum chaperone complex	GO:0004169//dolichyl-phosphate-mannose-protein mannosyltransferase activity;GO:0051087//chaperone binding;GO:0051117//ATPase binding;GO:0051787//misfolded protein binding	GO:0034976//response to endoplasmic reticulum stress;GO:0035269//protein O-linked mannosylation;GO:0042981//regulation of apoptotic process;GO:0071218//cellular response to misfolded protein;GO:0071712//ER-associated misfolded protein catabolic process
ENSMUSG00000069919	35643	32928	32436	17549	11085	8672	2151.22	1968.08	2039.99	1010.88	742.03	551.67	2053.09666666667	768.193333333333	-1.41826020716635	3.72285869895349e-12	2.19470732491615e-10	Hba-a1	hemoglobin alpha, adult chain 1 [Source:MGI Symbol;Acc:MGI:96015]	Human Diseases;Human Diseases	Infectious diseases;Infectious diseases	ko05143//African trypanosomiasis;ko05144//Malaria	K13822;K13822	GO:0005615//extracellular space;GO:0005833//hemoglobin complex;GO:0022627//cytosolic small ribosomal subunit;GO:0031838//haptoglobin-hemoglobin complex	GO:0004601//peroxidase activity;GO:0005344//oxygen transporter activity;GO:0005506//iron ion binding;GO:0019825//oxygen binding;GO:0020037//heme binding;GO:0031720//haptoglobin binding;GO:0043177//organic acid binding;GO:0044877//macromolecular complex binding;GO:0046872//metal ion binding	GO:0001701//in utero embryonic development;GO:0009617//response to bacterium;GO:0015671//oxygen transport;GO:0048821//erythrocyte development;GO:0098869//cellular oxidant detoxification
ENSMUSG00000045322	171	140	103	364	586	530	2.07	1.68	1.30	4.21	7.88	6.78	1.68333333333333	6.29	1.90173912996129	3.81530996464976e-12	2.24097052319264e-10	Tlr9	toll-like receptor 9 [Source:MGI Symbol;Acc:MGI:1932389]	Human Diseases;Human Diseases;Human Diseases;Human Diseases;Human Diseases;Human Diseases;Organismal Systems;Human Diseases;Human Diseases	Infectious diseases;Infectious diseases;Infectious diseases;Infectious diseases;Infectious diseases;Infectious diseases;Immune system;Cancer: overview;Infectious diseases	ko05168//Herpes simplex infection;ko05152//Tuberculosis;ko05132//Salmonella infection;ko05143//African trypanosomiasis;ko05162//Measles;ko05142//Chagas disease (American trypanosomiasis);ko04620//Toll-like receptor signaling pathway;ko05235//PD-L1 expression and PD-1 checkpoint pathway in cancer;ko05144//Malaria	K10161;K10161;K10161;K10161;K10161;K10161;K10161;K10161;K10161	GO:0005737//cytoplasm;GO:0005764//lysosome;GO:0005768//endosome;GO:0005783//endoplasmic reticulum;GO:0005789//endoplasmic reticulum membrane;GO:0005886//plasma membrane;GO:0016020//membrane;GO:0016021//integral component of membrane;GO:0016323//basolateral plasma membrane;GO:0016324//apical plasma membrane;GO:0031410//cytoplasmic vesicle;GO:0032009//early phagosome;GO:0036019//endolysosome;GO:004…	GO:0004888//transmembrane signaling receptor activity;GO:0005149//interleukin-1 receptor binding;GO:0005515//protein binding;GO:0035197//siRNA binding;GO:0038187//pattern recognition receptor activity;GO:0042803//protein homodimerization activity;GO:0045322//unmethylated CpG binding	GO:0001774//microglial cell activation;GO:0001816//cytokine production;GO:0001932//regulation of protein phosphorylation;GO:0002218//activation of innate immune response;GO:0002224//toll-like receptor signaling pathway;GO:0002237//response to molecule of bacterial origin;GO:0002376//immune system process;GO:0002639//positive regulation of immunoglobulin production;GO:0002730//regulation of dendri…
ENSMUSG00000039004	3940	4038	4327	2413	1542	2140	46.26	48.62	52.94	27.04	20.08	26.48	49.2733333333333	24.5333333333333	-1.0060638074854	4.1719802979063e-12	2.4415220466032e-10	Bmp6	bone morphogenetic protein 6 [Source:MGI Symbol;Acc:MGI:88182]	Environmental Information Processing;Environmental Information Processing;Environmental Information Processing;Organismal Systems	Signaling molecules and interaction;Signal transduction;Signal transduction;Endocrine system	ko04060//Cytokine-cytokine receptor interaction;ko04390//Hippo signaling pathway;ko04350//TGF-beta signaling pathway;ko04913//Ovarian Steroidogenesis	K16620;K16620;K16620;K16620	GO:0005576//extracellular region;GO:0005615//extracellular space;GO:0005623//cell;GO:0005737//cytoplasm;GO:0031982//vesicle	GO:0005125//cytokine activity;GO:0005515//protein binding;GO:0008083//growth factor activity;GO:0046982//protein heterodimerization activity;GO:0070700//BMP receptor binding	GO:0000122//negative regulation of transcription from RNA polymerase II promoter;GO:0001503//ossification;GO:0001649//osteoblast differentiation;GO:0001654//eye development;GO:0001822//kidney development;GO:0001938//positive regulation of endothelial cell proliferation;GO:0001958//endochondral ossification;GO:0003323//type B pancreatic cell development;GO:0006879//cellular iron ion homeostasis;GO…
ENSMUSG00000024397	48	43	47	139	143	174	2.40	2.13	2.45	6.65	7.93	9.19	2.32666666666667	7.92333333333333	1.76784296173278	4.49161492534711e-12	2.61901983010694e-10	Aif1	allograft inflammatory factor 1 [Source:MGI Symbol;Acc:MGI:1343098]	-	-	-	-	GO:0001726//ruffle;GO:0001891//phagocytic cup;GO:0005634//nucleus;GO:0005737//cytoplasm;GO:0005829//cytosol;GO:0005856//cytoskeleton;GO:0005884//actin filament;GO:0005886//plasma membrane;GO:0016020//membrane;GO:0030027//lamellipodium;GO:0032587//ruffle membrane;GO:0042995//cell projection;GO:0043204//perikaryon;GO:0048471//perinuclear region of cytoplasm	GO:0003779//actin binding;GO:0005509//calcium ion binding;GO:0005515//protein binding;GO:0046872//metal ion binding;GO:0051015//actin filament binding	GO:0001774//microglial cell activation;GO:0001934//positive regulation of protein phosphorylation;GO:0006911//phagocytosis, engulfment;GO:0006954//inflammatory response;GO:0008284//positive regulation of cell proliferation;GO:0010629//negative regulation of gene expression;GO:0014739//positive regulation of muscle hyperplasia;GO:0016601//Rac protein signal transduction;GO:0021549//cerebellum deve…
ENSMUSG00000030866	10	10	7	69	93	64	0.14	0.14	0.11	0.95	1.49	0.97	0.13	1.13666666666667	3.12822571016193	4.58912007401784e-12	2.6661789995245e-10	Ern2	endoplasmic reticulum (ER) to nucleus signalling 2 [Source:MGI Symbol;Acc:MGI:1349436]	-	-	-	-	GO:0005783//endoplasmic reticulum;GO:0005789//endoplasmic reticulum membrane;GO:0016020//membrane;GO:0016021//integral component of membrane;GO:1990604//IRE1-TRAF2-ASK1 complex	GO:0000166//nucleotide binding;GO:0000287//magnesium ion binding;GO:0003824//catalytic activity;GO:0004519//endonuclease activity;GO:0004521//endoribonuclease activity;GO:0004540//ribonuclease activity;GO:0004672//protein kinase activity;GO:0004674//protein serine/threonine kinase activity;GO:0005515//protein binding;GO:0005524//ATP binding;GO:0016301//kinase activity;GO:0016740//transferase acti…	GO:0006355//regulation of transcription, DNA-templated;GO:0006397//mRNA processing;GO:0006468//protein phosphorylation;GO:0006915//apoptotic process;GO:0006986//response to unfolded protein;GO:0007050//cell cycle arrest;GO:0007257//activation of JUN kinase activity;GO:0008152//metabolic process;GO:0016075//rRNA catabolic process;GO:0016310//phosphorylation;GO:0030263//apoptotic chromosome condens…
ENSMUSG00000094509	1	5	1	159	66	51	0.12	0.60	0.13	18.26	8.83	6.51	0.283333333333333	11.2	5.30485458152842	4.86118122184193e-12	2.81404479755363e-10	Ighv14-1	immunoglobulin heavy variable 14-1 [Source:MGI Symbol;Acc:MGI:4439920]	Environmental Information Processing;Human Diseases;Human Diseases;Environmental Information Processing;Cellular Processes;Human Diseases;Human Diseases;Environmental Information Processing;Human Diseases;Human Diseases;Human Diseases;Environmental Information Processing;Organismal Systems;Human Diseases;Human Diseases;Organismal Systems;Organismal Systems;Human Diseases;Organismal Systems;Human …	Signal transduction;Infectious diseases;Infectious diseases;Signal transduction;Transport and catabolism;Cancers;Infectious diseases;Signal transduction;Immune diseases;Infectious diseases;Infectious diseases;Signal transduction;Immune system;Immune diseases;Cardiovascular diseases;Immune system;Immune system;Cardiovascular diseases;Immune system;Immune diseases;Infectious diseases;Immune system;…	ko04151//PI3K-Akt signaling pathway;ko05169//Epstein-Barr virus infection;ko05130//Pathogenic Escherichia coli infection;ko04020//Calcium signaling pathway;ko04145//Phagosome;ko05202//Transcriptional misregulation in cancers;ko05152//Tuberculosis;ko04072//Phospholipase D signaling pathway;ko05322//Systemic lupus erythematosus;ko05150//Staphylococcus aureus infection;ko05146//Amoebiasis;ko04064//N…	K06856;K06856;K06856;K06856;K06856;K06856;K06856;K06856;K06856;K06856;K06856;K06856;K06856;K06856;K06856;K06856;K06856;K06856;K06856;K06856;K06856;K06856;K06856;K06856;K06856;K06856;K06856	GO:0009897//external side of plasma membrane;GO:0042571//immunoglobulin complex, circulating	GO:0003823//antigen binding;GO:0034987//immunoglobulin receptor binding	GO:0006910//phagocytosis, recognition;GO:0006911//phagocytosis, engulfment;GO:0006958//complement activation, classical pathway;GO:0042742//defense response to bacterium;GO:0045087//innate immune response;GO:0050853//B cell receptor signaling pathway;GO:0050871//positive regulation of B cell activation
ENSMUSG00000037370	223	228	243	590	493	419	2.32	2.54	2.60	6.70	6.16	5.03	2.48666666666667	5.96333333333333	1.26190585179667	5.07277072598722e-12	2.92596685579874e-10	Enpp1	ectonucleotide pyrophosphatase/phosphodiesterase 1 [Source:MGI Symbol;Acc:MGI:97370]	Metabolism;Metabolism;Metabolism;Metabolism;Metabolism;Metabolism;Metabolism	Global and overview maps;Nucleotide metabolism;Nucleotide metabolism;Metabolism of cofactors and vitamins;Carbohydrate metabolism;Metabolism of cofactors and vitamins;Metabolism of cofactors and vitamins	ko01100//Metabolic pathways;ko00230//Purine metabolism;ko00240//Pyrimidine metabolism;ko00760//Nicotinate and nicotinamide metabolism;ko00500//Starch and sucrose metabolism;ko00770//Pantothenate and CoA biosynthesis;ko00740//Riboflavin metabolism	K01513;K01513;K01513;K01513;K01513;K01513;K01513	GO:0005615//extracellular space;GO:0005623//cell;GO:0005886//plasma membrane;GO:0009986//cell surface;GO:0016020//membrane;GO:0016021//integral component of membrane	GO:0003676//nucleic acid binding;GO:0003824//catalytic activity;GO:0004527//exonuclease activity;GO:0004528//phosphodiesterase I activity;GO:0004551//nucleotide diphosphatase activity;GO:0005044//scavenger receptor activity;GO:0005158//insulin receptor binding;GO:0005524//ATP binding;GO:0016787//hydrolase activity;GO:0030247//polysaccharide binding;GO:0042803//protein homodimerization activity;GO…	GO:0006091//generation of precursor metabolites and energy;GO:0006796//phosphate-containing compound metabolic process;GO:0006897//endocytosis;GO:0006955//immune response;GO:0009143//nucleoside triphosphate catabolic process;GO:0030308//negative regulation of cell growth;GO:0030318//melanocyte differentiation;GO:0030505//inorganic diphosphate transport;GO:0030643//cellular phosphate ion homeostas…
ENSMUSG00000025355	720	654	586	2543	3797	1470	9.53	9.07	8.14	31.27	54.65	21.08	8.91333333333333	35.6666666666667	2.00053942608252	6.21565133629398e-12	3.55957032776693e-10	Mmp19	matrix metallopeptidase 19 [Source:MGI Symbol;Acc:MGI:1927899]	-	-	-	-	GO:0005576//extracellular region;GO:0005615//extracellular space;GO:0005886//plasma membrane;GO:0016020//membrane;GO:0031012//extracellular matrix;GO:0031225//anchored component of membrane	GO:0004222//metalloendopeptidase activity;GO:0008233//peptidase activity;GO:0008237//metallopeptidase activity;GO:0008270//zinc ion binding;GO:0016787//hydrolase activity;GO:0046872//metal ion binding	GO:0001525//angiogenesis;GO:0001541//ovarian follicle development;GO:0001542//ovulation from ovarian follicle;GO:0001554//luteolysis;GO:0006508//proteolysis;GO:0007275//multicellular organism development;GO:0009725//response to hormone;GO:0030154//cell differentiation;GO:0030198//extracellular matrix organization;GO:0030574//collagen catabolic process;GO:0051591//response to cAMP
ENSMUSG00000076570	1	5	1	66	69	50	0.12	0.60	0.13	7.66	9.30	6.41	0.283333333333333	7.79	4.78105108264513	6.31166677992954e-12	3.60169312513061e-10	Igkv12-38	immunoglobulin kappa chain variable 12-38 [Source:MGI Symbol;Acc:MGI:4439614]	-	-	-	-	GO:0005615//extracellular space	-	GO:0002377//immunoglobulin production;GO:0006955//immune response
ENSMUSG00000076562	2	4	1	588	640	75	0.24	0.46	0.12	67.26	85.07	9.52	0.273333333333333	53.95	7.62481774047845	6.84771299229106e-12	3.89225085301747e-10	Igkv4-50	immunoglobulin kappa variable 4-50 [Source:MGI Symbol;Acc:MGI:2685915]	-	-	-	-	GO:0005615//extracellular space	-	GO:0002377//immunoglobulin production;GO:0006955//immune response
ENSMUSG00000056553	28	22	19	112	121	90	0.36	0.28	0.33	1.39	1.74	1.29	0.323333333333333	1.47333333333333	2.1879897172043	6.86939190149013e-12	3.89225085301747e-10	Ptprn2	protein tyrosine phosphatase, receptor type, N polypeptide 2 [Source:MGI Symbol;Acc:MGI:107418]	Human Diseases	Endocrine and metabolic diseases	ko04940//Type I diabetes mellitus	K07817	GO:0005623//cell;GO:0005737//cytoplasm;GO:0005788//endoplasmic reticulum lumen;GO:0016020//membrane;GO:0016021//integral component of membrane;GO:0030054//cell junction;GO:0030141//secretory granule;GO:0030285//integral component of synaptic vesicle membrane;GO:0030658//transport vesicle membrane;GO:0030667//secretory granule membrane;GO:0030672//synaptic vesicle membrane;GO:0031410//cytoplasmic …	GO:0004721//phosphoprotein phosphatase activity;GO:0004725//protein tyrosine phosphatase activity;GO:0005515//protein binding;GO:0016787//hydrolase activity;GO:0016791//phosphatase activity	GO:0006470//protein dephosphorylation;GO:0006629//lipid metabolic process;GO:0007269//neurotransmitter secretion;GO:0016311//dephosphorylation;GO:0034260//negative regulation of GTPase activity;GO:0035335//peptidyl-tyrosine dephosphorylation;GO:0035773//insulin secretion involved in cellular response to glucose stimulus
ENSMUSG00000076652	3	3	10	308	189	39	0.35	0.35	1.22	34.35	24.50	4.80	0.64	21.2166666666667	5.05098229806757	7.74170405899767e-12	4.35572717845711e-10	Ighv7-3	immunoglobulin heavy variable 7-3 [Source:MGI Symbol;Acc:MGI:4439766]	Environmental Information Processing;Human Diseases;Human Diseases;Environmental Information Processing;Cellular Processes;Human Diseases;Human Diseases;Environmental Information Processing;Human Diseases;Human Diseases;Human Diseases;Environmental Information Processing;Organismal Systems;Human Diseases;Human Diseases;Organismal Systems;Organismal Systems;Human Diseases;Organismal Systems;Human …	Signal transduction;Infectious diseases;Infectious diseases;Signal transduction;Transport and catabolism;Cancers;Infectious diseases;Signal transduction;Immune diseases;Infectious diseases;Infectious diseases;Signal transduction;Immune system;Immune diseases;Cardiovascular diseases;Immune system;Immune system;Cardiovascular diseases;Immune system;Immune diseases;Infectious diseases;Immune system;…	ko04151//PI3K-Akt signaling pathway;ko05169//Epstein-Barr virus infection;ko05130//Pathogenic Escherichia coli infection;ko04020//Calcium signaling pathway;ko04145//Phagosome;ko05202//Transcriptional misregulation in cancers;ko05152//Tuberculosis;ko04072//Phospholipase D signaling pathway;ko05322//Systemic lupus erythematosus;ko05150//Staphylococcus aureus infection;ko05146//Amoebiasis;ko04064//N…	K06856;K06856;K06856;K06856;K06856;K06856;K06856;K06856;K06856;K06856;K06856;K06856;K06856;K06856;K06856;K06856;K06856;K06856;K06856;K06856;K06856;K06856;K06856;K06856;K06856;K06856;K06856	GO:0009897//external side of plasma membrane;GO:0042571//immunoglobulin complex, circulating	GO:0003823//antigen binding;GO:0034987//immunoglobulin receptor binding	GO:0006910//phagocytosis, recognition;GO:0006911//phagocytosis, engulfment;GO:0006958//complement activation, classical pathway;GO:0042742//defense response to bacterium;GO:0045087//innate immune response;GO:0050853//B cell receptor signaling pathway;GO:0050871//positive regulation of B cell activation
ENSMUSG00000076564	32	26	26	215	569	131	3.58	2.88	3.03	22.96	70.62	15.45	3.16333333333333	36.3433333333333	3.52217325492723	8.11523333490801e-12	4.53406852004355e-10	Igkv12-46	immunoglobulin kappa variable 12-46 [Source:MGI Symbol;Acc:MGI:4439773]	-	-	-	-	GO:0005615//extracellular space	-	GO:0002377//immunoglobulin production;GO:0006955//immune response
ENSMUSG00000032315	5223	3904	2948	1796	1302	1606	84.04	62.20	49.44	27.59	23.24	27.23	65.2266666666667	26.02	-1.32584094108844	9.40813735531914e-12	5.2200512973198e-10	Cyp1a1	cytochrome P450, family 1, subfamily a, polypeptide 1 [Source:MGI Symbol;Acc:MGI:88588]	Metabolism;Human Diseases;Metabolism;Metabolism;Metabolism;Organismal Systems;Metabolism	Global and overview maps;Cancers;Lipid metabolism;Metabolism of cofactors and vitamins;Xenobiotics biodegradation and metabolism;Endocrine system;Amino acid metabolism	ko01100//Metabolic pathways;ko05204//Chemical carcinogenesis;ko00140//Steroid hormone biosynthesis;ko00830//Retinol metabolism;ko00980//Metabolism of xenobiotics by cytochrome P450;ko04913//Ovarian Steroidogenesis;ko00380//Tryptophan metabolism	K07408;K07408;K07408;K07408;K07408;K07408;K07408	GO:0005737//cytoplasm;GO:0005739//mitochondrion;GO:0005743//mitochondrial inner membrane;GO:0005783//endoplasmic reticulum;GO:0005789//endoplasmic reticulum membrane;GO:0016020//membrane;GO:0031090//organelle membrane;GO:0043231//intracellular membrane-bounded organelle	GO:0003824//catalytic activity;GO:0004497//monooxygenase activity;GO:0005506//iron ion binding;GO:0008391//arachidonic acid monooxygenase activity;GO:0008395//steroid hydroxylase activity;GO:0016491//oxidoreductase activity;GO:0016679//oxidoreductase activity, acting on diphenols and related substances as donors;GO:0016705//oxidoreductase activity, acting on paired donors, with incorporation or r…	GO:0001666//response to hypoxia;GO:0001889//liver development;GO:0002933//lipid hydroxylation;GO:0006629//lipid metabolic process;GO:0006631//fatty acid metabolic process;GO:0006694//steroid biosynthetic process;GO:0006778//porphyrin-containing compound metabolic process;GO:0007568//aging;GO:0008202//steroid metabolic process;GO:0008210//estrogen metabolic process;GO:0008283//cell proliferation;G…
ENSMUSG00000072620	791	944	657	1603	2359	2124	20.05	23.70	17.36	38.78	66.33	56.76	20.37	53.9566666666667	1.40535524396438	9.69424301429509e-12	5.34182772282549e-10	Slfn2	schlafen 2 [Source:MGI Symbol;Acc:MGI:1313258]	-	-	-	-	-	-	GO:0008285//negative regulation of cell proliferation;GO:0009617//response to bacterium
ENSMUSG00000089942	314	402	306	988	641	718	3.88	4.91	3.94	11.52	8.75	9.30	4.24333333333333	9.85666666666667	1.21590182421897	1.21406730983444e-11	6.57688152472811e-10	Pira2	paired-Ig-like receptor A2 [Source:MGI Symbol;Acc:MGI:1195970]	Organismal Systems;Organismal Systems	Immune system;Development	ko04662//B cell receptor signaling pathway;ko04380//Osteoclast differentiation	K06512;K06512	GO:0005575//cellular_component	GO:0003674//molecular_function	GO:0008150//biological_process
ENSMUSG00000112023	166	143	94	466	525	342	4.70	4.41	2.84	12.71	16.15	10.13	3.98333333333333	12.9966666666667	1.70609353652953	1.47839243935074e-11	7.95504119630506e-10	Lilr4b	leukocyte immunoglobulin-like receptor, subfamily B, member 4B [Source:MGI Symbol;Acc:MGI:102702]	Organismal Systems;Organismal Systems	Immune system;Development	ko04662//B cell receptor signaling pathway;ko04380//Osteoclast differentiation	K06512;K06512	GO:0016020//membrane;GO:0016021//integral component of membrane	-	-
ENSMUSG00000040197	4	1	4	49	62	58	0.09	0.02	0.10	1.09	1.61	1.43	0.07	1.37666666666667	4.29768054864069	1.58531551885369e-11	8.50185095144444e-10	Cd209e	CD209e antigen [Source:MGI Symbol;Acc:MGI:2157948]	Cellular Processes;Human Diseases;Human Diseases;Organismal Systems	Transport and catabolism;Infectious diseases;Infectious diseases;Immune system	ko04145//Phagosome;ko05152//Tuberculosis;ko05162//Measles;ko04625//C-type lectin receptor signaling pathway	K06563;K06563;K06563;K06563	GO:0005886//plasma membrane;GO:0009897//external side of plasma membrane;GO:0016020//membrane;GO:0016021//integral component of membrane	GO:0005537//mannose binding;GO:0030246//carbohydrate binding	GO:0006897//endocytosis;GO:0042102//positive regulation of T cell proliferation;GO:0097323//B cell adhesion
ENSMUSG00000037010	1705	1975	2001	614	745	952	22.84	26.20	27.94	7.85	11.07	13.44	25.66	10.7866666666667	-1.25027206338086	1.80627898761452e-11	9.62248623468401e-10	Apln	apelin [Source:MGI Symbol;Acc:MGI:1353624]	Environmental Information Processing;Environmental Information Processing	Signaling molecules and interaction;Signal transduction	ko04080//Neuroactive ligand-receptor interaction;ko04371//Apelin signaling pathway	K05225;K05225	GO:0005576//extracellular region;GO:0005615//extracellular space;GO:0048471//perinuclear region of cytoplasm	GO:0005102//receptor binding;GO:0005179//hormone activity;GO:0031704//apelin receptor binding;GO:0042802//identical protein binding	GO:0001525//angiogenesis;GO:0002026//regulation of the force of heart contraction;GO:0007165//signal transduction;GO:0007186//G-protein coupled receptor signaling pathway;GO:0007275//multicellular organism development;GO:0007369//gastrulation;GO:0007631//feeding behavior;GO:0008284//positive regulation of cell proliferation;GO:0010629//negative regulation of gene expression;GO:0031652//positive r…
ENSMUSG00000076731	25	30	15	366	2454	7147	2.95	3.50	1.84	41.16	320.74	887.67	2.76333333333333	416.523333333333	7.2358439053534	1.91572952953485e-11	1.01717625847984e-09	Ighv8-12	immunoglobulin heavy variable V8-12 [Source:MGI Symbol;Acc:MGI:3642873]	Environmental Information Processing;Human Diseases;Human Diseases;Environmental Information Processing;Cellular Processes;Human Diseases;Human Diseases;Environmental Information Processing;Human Diseases;Human Diseases;Human Diseases;Environmental Information Processing;Organismal Systems;Human Diseases;Human Diseases;Organismal Systems;Organismal Systems;Human Diseases;Organismal Systems;Human …	Signal transduction;Infectious diseases;Infectious diseases;Signal transduction;Transport and catabolism;Cancers;Infectious diseases;Signal transduction;Immune diseases;Infectious diseases;Infectious diseases;Signal transduction;Immune system;Immune diseases;Cardiovascular diseases;Immune system;Immune system;Cardiovascular diseases;Immune system;Immune diseases;Infectious diseases;Immune system;…	ko04151//PI3K-Akt signaling pathway;ko05169//Epstein-Barr virus infection;ko05130//Pathogenic Escherichia coli infection;ko04020//Calcium signaling pathway;ko04145//Phagosome;ko05202//Transcriptional misregulation in cancers;ko05152//Tuberculosis;ko04072//Phospholipase D signaling pathway;ko05322//Systemic lupus erythematosus;ko05150//Staphylococcus aureus infection;ko05146//Amoebiasis;ko04064//N…	K06856;K06856;K06856;K06856;K06856;K06856;K06856;K06856;K06856;K06856;K06856;K06856;K06856;K06856;K06856;K06856;K06856;K06856;K06856;K06856;K06856;K06856;K06856;K06856;K06856;K06856;K06856	GO:0009897//external side of plasma membrane;GO:0042571//immunoglobulin complex, circulating	GO:0003823//antigen binding;GO:0034987//immunoglobulin receptor binding	GO:0006910//phagocytosis, recognition;GO:0006911//phagocytosis, engulfment;GO:0006958//complement activation, classical pathway;GO:0042742//defense response to bacterium;GO:0045087//innate immune response;GO:0050853//B cell receptor signaling pathway;GO:0050871//positive regulation of B cell activation
ENSMUSG00000094796	44	43	25	131	263	221	1.16	1.13	0.69	3.73	9.63	6.16	0.993333333333333	6.50666666666667	2.71156881710073	1.92260628264879e-11	1.01745847334235e-09	BC147527	cDNA sequence BC147527 [Source:MGI Symbol;Acc:MGI:4840510]	-	-	-	-	-	-	-
ENSMUSG00000094787	7	11	9	231	1992	406	0.78	1.22	1.05	24.67	247.23	47.88	1.01666666666667	106.593333333333	6.71212665826546	1.93038909906906e-11	1.01821675011751e-09	Ighv1-54	immunoglobulin heavy variable V1-54 [Source:MGI Symbol;Acc:MGI:3647133]	Environmental Information Processing;Human Diseases;Human Diseases;Environmental Information Processing;Cellular Processes;Human Diseases;Human Diseases;Environmental Information Processing;Human Diseases;Human Diseases;Human Diseases;Environmental Information Processing;Organismal Systems;Human Diseases;Human Diseases;Organismal Systems;Organismal Systems;Human Diseases;Organismal Systems;Human …	Signal transduction;Infectious diseases;Infectious diseases;Signal transduction;Transport and catabolism;Cancers;Infectious diseases;Signal transduction;Immune diseases;Infectious diseases;Infectious diseases;Signal transduction;Immune system;Immune diseases;Cardiovascular diseases;Immune system;Immune system;Cardiovascular diseases;Immune system;Immune diseases;Infectious diseases;Immune system;…	ko04151//PI3K-Akt signaling pathway;ko05169//Epstein-Barr virus infection;ko05130//Pathogenic Escherichia coli infection;ko04020//Calcium signaling pathway;ko04145//Phagosome;ko05202//Transcriptional misregulation in cancers;ko05152//Tuberculosis;ko04072//Phospholipase D signaling pathway;ko05322//Systemic lupus erythematosus;ko05150//Staphylococcus aureus infection;ko05146//Amoebiasis;ko04064//N…	K06856;K06856;K06856;K06856;K06856;K06856;K06856;K06856;K06856;K06856;K06856;K06856;K06856;K06856;K06856;K06856;K06856;K06856;K06856;K06856;K06856;K06856;K06856;K06856;K06856;K06856;K06856	GO:0009897//external side of plasma membrane;GO:0042571//immunoglobulin complex, circulating	GO:0003823//antigen binding;GO:0034987//immunoglobulin receptor binding	GO:0006910//phagocytosis, recognition;GO:0006911//phagocytosis, engulfment;GO:0006958//complement activation, classical pathway;GO:0042742//defense response to bacterium;GO:0045087//innate immune response;GO:0050853//B cell receptor signaling pathway;GO:0050871//positive regulation of B cell activation
ENSMUSG00000033538	116	169	115	339	314	330	3.69	5.99	3.96	10.98	11.66	12.13	4.54666666666667	11.59	1.34999942270345	2.01732343838157e-11	1.06058299457208e-09	Casp4	caspase 4, apoptosis-related cysteine peptidase [Source:MGI Symbol;Acc:MGI:107700]	Human Diseases;Human Diseases;Human Diseases;Organismal Systems	Infectious diseases;Infectious diseases;Infectious diseases;Immune system	ko05130//Pathogenic Escherichia coli infection;ko05131//Shigellosis;ko05132//Salmonella infection;ko04621//NOD-like receptor signaling pathway	K04394;K04394;K04394;K04394	GO:0005576//extracellular region;GO:0005737//cytoplasm;GO:0005739//mitochondrion;GO:0005783//endoplasmic reticulum;GO:0005789//endoplasmic reticulum membrane;GO:0005829//cytosol;GO:0005886//plasma membrane;GO:0016020//membrane;GO:0032991//macromolecular complex;GO:0043005//neuron projection;GO:0043025//neuronal cell body;GO:0061702//inflammasome complex;GO:0072557//IPAF inflammasome complex;GO:00…	GO:0004197//cysteine-type endopeptidase activity;GO:0005515//protein binding;GO:0008233//peptidase activity;GO:0008234//cysteine-type peptidase activity;GO:0016787//hydrolase activity;GO:0050700//CARD domain binding;GO:0097110//scaffold protein binding;GO:0097199//cysteine-type endopeptidase activity involved in apoptotic signaling pathway	GO:0002376//immune system process;GO:0006508//proteolysis;GO:0006915//apoptotic process;GO:0006919//activation of cysteine-type endopeptidase activity involved in apoptotic process;GO:0006954//inflammatory response;GO:0007015//actin filament organization;GO:0012501//programmed cell death;GO:0035234//ectopic germ cell programmed cell death;GO:0042981//regulation of apoptotic process;GO:0045087//in…
ENSMUSG00000040751	151	219	147	469	575	414	4.53	6.79	5.10	13.44	19.34	13.85	5.47333333333333	15.5433333333333	1.50580430256209	2.11328735730848e-11	1.10740401223665e-09	Lat2	linker for activation of T cells family, member 2 [Source:MGI Symbol;Acc:MGI:1926479]	-	-	-	-	GO:0005886//plasma membrane;GO:0016020//membrane;GO:0016021//integral component of membrane;GO:0042629//mast cell granule;GO:0045121//membrane raft	GO:0042169//SH2 domain binding	GO:0002250//adaptive immune response;GO:0002376//immune system process;GO:0002764//immune response-regulating signaling pathway;GO:0019722//calcium-mediated signaling;GO:0035556//intracellular signal transduction;GO:0042113//B cell activation;GO:0043303//mast cell degranulation;GO:0050853//B cell receptor signaling pathway
ENSMUSG00000035004	264	242	163	578	595	496	5.12	4.65	3.29	10.70	12.80	10.14	4.35333333333333	11.2133333333333	1.36502280870871	2.84752446255757e-11	1.4776716749874e-09	Igsf6	immunoglobulin superfamily, member 6 [Source:MGI Symbol;Acc:MGI:1891393]	-	-	-	-	GO:0005575//cellular_component;GO:0016020//membrane;GO:0016021//integral component of membrane	GO:0003674//molecular_function	GO:0008150//biological_process
ENSMUSG00000069917	92448	85440	75997	44500	28038	21305	7040.00	6443.34	6030.68	3234.31	2368.08	1709.99	6504.67333333333	2437.46	-1.41609806250756	3.43016730868187e-11	1.76857661719337e-09	Hba-a2	hemoglobin alpha, adult chain 2 [Source:MGI Symbol;Acc:MGI:96016]	Human Diseases;Human Diseases	Infectious diseases;Infectious diseases	ko05143//African trypanosomiasis;ko05144//Malaria	K13822;K13822	GO:0005615//extracellular space;GO:0005833//hemoglobin complex;GO:0022627//cytosolic small ribosomal subunit;GO:0031838//haptoglobin-hemoglobin complex	GO:0004601//peroxidase activity;GO:0005344//oxygen transporter activity;GO:0005506//iron ion binding;GO:0019825//oxygen binding;GO:0020037//heme binding;GO:0031720//haptoglobin binding;GO:0043177//organic acid binding;GO:0044877//macromolecular complex binding;GO:0046872//metal ion binding	GO:0001701//in utero embryonic development;GO:0009617//response to bacterium;GO:0015671//oxygen transport;GO:0048821//erythrocyte development;GO:0098869//cellular oxidant detoxification
ENSMUSG00000031264	278	328	252	660	720	535	4.62	5.40	4.36	10.66	13.46	9.56	4.79333333333333	11.2266666666667	1.2278284626271	3.9973638697994e-11	2.04132896981635e-09	Btk	Bruton agammaglobulinemia tyrosine kinase [Source:MGI Symbol;Acc:MGI:88216]	Human Diseases;Environmental Information Processing;Organismal Systems;Organismal Systems;Human Diseases;Organismal Systems;Organismal Systems	Infectious diseases;Signal transduction;Immune system;Immune system;Immune diseases;Development;Immune system	ko05169//Epstein-Barr virus infection;ko04064//NF-kappa B signaling pathway;ko04662//B cell receptor signaling pathway;ko04664//Fc epsilon RI signaling pathway;ko05340//Primary immunodeficiency;ko04380//Osteoclast differentiation;ko04611//Platelet activation	K07370;K07370;K07370;K07370;K07370;K07370;K07370	GO:0005634//nucleus;GO:0005737//cytoplasm;GO:0005829//cytosol;GO:0005886//plasma membrane;GO:0016020//membrane;GO:0031410//cytoplasmic vesicle;GO:0042629//mast cell granule;GO:0045121//membrane raft;GO:0048471//perinuclear region of cytoplasm	GO:0000166//nucleotide binding;GO:0004672//protein kinase activity;GO:0004713//protein tyrosine kinase activity;GO:0004715//non-membrane spanning protein tyrosine kinase activity;GO:0005515//protein binding;GO:0005524//ATP binding;GO:0005547//phosphatidylinositol-3,4,5-trisphosphate binding;GO:0008289//lipid binding;GO:0016301//kinase activity;GO:0016740//transferase activity;GO:0042802//identica…	GO:0001805//positive regulation of type III hypersensitivity;GO:0001812//positive regulation of type I hypersensitivity;GO:0001818//negative regulation of cytokine production;GO:0002250//adaptive immune response;GO:0002344//B cell affinity maturation;GO:0002376//immune system process;GO:0002553//histamine secretion by mast cell;GO:0006468//protein phosphorylation;GO:0006915//apoptotic process;GO:…
ENSMUSG00000030921	548	594	433	1121	2637	2189	6.13	6.58	5.05	11.97	32.72	25.81	5.92	23.5	1.98899167582341	4.30734266092431e-11	2.1651485757969e-09	Trim30a	tripartite motif-containing 30A [Source:MGI Symbol;Acc:MGI:98178]	Human Diseases	Infectious disease: viral	ko05170//Human immunodeficiency virus 1 infection	K10648	GO:0005634//nucleus;GO:0005737//cytoplasm	GO:0003677//DNA binding;GO:0004842//ubiquitin-protein transferase activity;GO:0005515//protein binding;GO:0008270//zinc ion binding;GO:0046872//metal ion binding	GO:0006914//autophagy;GO:0009617//response to bacterium;GO:0032715//negative regulation of interleukin-6 production;GO:0032720//negative regulation of tumor necrosis factor production;GO:0034122//negative regulation of toll-like receptor signaling pathway;GO:0045087//innate immune response;GO:0045732//positive regulation of protein catabolic process;GO:0046598//positive regulation of viral entry …
ENSMUSG00000026548	120	142	126	292	338	453	3.86	4.52	4.22	8.95	12.05	15.34	4.2	12.1133333333333	1.52813468584683	4.752599014162e-11	2.38149766225274e-09	Slamf9	SLAM family member 9 [Source:MGI Symbol;Acc:MGI:1923692]	-	-	-	-	GO:0016020//membrane;GO:0016021//integral component of membrane	-	-
ENSMUSG00000004933	23	33	23	146	284	113	0.52	0.75	0.53	3.24	7.50	2.78	0.6	4.50666666666667	2.90902633995251	4.94348732042296e-11	2.46943361940754e-09	Matk	megakaryocyte-associated tyrosine kinase [Source:MGI Symbol;Acc:MGI:99259]	Organismal Systems	Nervous system	ko04722//Neurotrophin signaling pathway	K08888	-	GO:0000166//nucleotide binding;GO:0004672//protein kinase activity;GO:0004713//protein tyrosine kinase activity;GO:0004715//non-membrane spanning protein tyrosine kinase activity;GO:0005515//protein binding;GO:0005524//ATP binding;GO:0016301//kinase activity;GO:0016740//transferase activity	GO:0006468//protein phosphorylation;GO:0016310//phosphorylation;GO:0018108//peptidyl-tyrosine phosphorylation
ENSMUSG00000034593	761	771	774	1616	1852	1290	5.42	4.76	5.41	10.16	14.80	10.01	5.19666666666667	11.6566666666667	1.16549686799993	5.23160714751469e-11	2.58916112995056e-09	Myo5a	myosin VA [Source:MGI Symbol;Acc:MGI:105976]	Human Diseases	Infectious diseases	ko05130//Pathogenic Escherichia coli infection	K10357	GO:0001726//ruffle;GO:0001750//photoreceptor outer segment;GO:0005623//cell;GO:0005737//cytoplasm;GO:0005764//lysosome;GO:0005769//early endosome;GO:0005770//late endosome;GO:0005777//peroxisome;GO:0005783//endoplasmic reticulum;GO:0005790//smooth endoplasmic reticulum;GO:0005794//Golgi apparatus;GO:0005829//cytosol;GO:0005882//intermediate filament;GO:0005884//actin filament;GO:0008021//synaptic…	GO:0000146//microfilament motor activity;GO:0000149//SNARE binding;GO:0000166//nucleotide binding;GO:0003774//motor activity;GO:0003779//actin binding;GO:0005509//calcium ion binding;GO:0005515//protein binding;GO:0005516//calmodulin binding;GO:0005524//ATP binding;GO:0017075//syntaxin-1 binding;GO:0017137//Rab GTPase binding;GO:0019901//protein kinase binding;GO:0030898//actin-dependent ATPase a…	GO:0006582//melanin metabolic process;GO:0006887//exocytosis;GO:0006892//post-Golgi vesicle-mediated transport;GO:0007015//actin filament organization;GO:0007268//synaptic transmission;GO:0007601//visual perception;GO:0015031//protein transport;GO:0016192//vesicle-mediated transport;GO:0017157//regulation of exocytosis;GO:0030048//actin filament-based movement;GO:0030050//vesicle transport along …
ENSMUSG00000037731	635	610	492	1032	1100	1271	8.70	8.28	7.03	13.50	16.71	18.35	8.00333333333333	16.1866666666667	1.01613301802527	5.4275566767799e-11	2.67787296345125e-09	Themis2	thymocyte selection associated family member 2 [Source:MGI Symbol;Acc:MGI:2446213]	-	-	-	-	GO:0005634//nucleus;GO:0005737//cytoplasm	GO:0005515//protein binding	GO:0002376//immune system process;GO:0006954//inflammatory response;GO:0050852//T cell receptor signaling pathway
ENSMUSG00000053318	74	52	42	194	374	231	1.88	1.31	1.11	4.71	10.55	6.19	1.43333333333333	7.15	2.31856908279745	6.04521348192869e-11	2.97346620192413e-09	Slamf8	SLAM family member 8 [Source:MGI Symbol;Acc:MGI:1921998]	-	-	-	-	GO:0016020//membrane;GO:0016021//integral component of membrane	-	-
ENSMUSG00000034459	0	0	0	57	50	50	0.00	0.00	0.00	0.86	0.88	0.83	0.001	0.856666666666667	9.74259014336008	6.38188264000598e-11	3.11992341867365e-09	Ifit1	interferon-induced protein with tetratricopeptide repeats 1 [Source:MGI Symbol;Acc:MGI:99450]	Human Diseases	Infectious diseases	ko05160//Hepatitis C	K14217	GO:0005737//cytoplasm;GO:0005829//cytosol	GO:0003723//RNA binding;GO:0005515//protein binding	GO:0002376//immune system process;GO:0009615//response to virus;GO:0009617//response to bacterium;GO:0035457//cellular response to interferon-alpha;GO:0035458//cellular response to interferon-beta;GO:0045087//innate immune response;GO:0051607//defense response to virus
ENSMUSG00000037921	299	298	249	602	1529	1404	2.84	2.24	2.14	5.57	15.32	13.51	2.40666666666667	11.4666666666667	2.25233782270229	7.1979607781602e-11	3.48698794796975e-09	Ddx60	DEAD (Asp-Glu-Ala-Asp) box polypeptide 60 [Source:MGI Symbol;Acc:MGI:2384570]	-	-	-	-	GO:0005737//cytoplasm;GO:0005829//cytosol;GO:0045111//intermediate filament cytoskeleton	GO:0003676//nucleic acid binding;GO:0003690//double-stranded DNA binding;GO:0003723//RNA binding;GO:0003725//double-stranded RNA binding;GO:0003727//single-stranded RNA binding;GO:0005515//protein binding;GO:0005524//ATP binding	GO:0009615//response to virus;GO:0051607//defense response to virus;GO:1900245//positive regulation of MDA-5 signaling pathway;GO:1900246//positive regulation of RIG-I signaling pathway
ENSMUSG00000044811	235	282	218	605	762	502	8.16	9.75	7.98	20.16	29.57	18.32	8.63	22.6833333333333	1.39420019649124	7.38149115955424e-11	3.56512682962206e-09	Cd300c2	CD300C molecule 2 [Source:MGI Symbol;Acc:MGI:2153249]	-	-	-	-	GO:0005886//plasma membrane;GO:0016020//membrane;GO:0016021//integral component of membrane	GO:0005515//protein binding	GO:0002376//immune system process;GO:0050715//positive regulation of cytokine secretion
ENSMUSG00000076535	32	26	30	497	1135	6592	3.73	3.00	3.64	55.28	146.71	809.70	3.45666666666667	337.23	6.60820758567936	7.49021695641122e-11	3.59087115591688e-09	Igkv1-88	immunoglobulin kappa chain variable 1-88 [Source:MGI Symbol;Acc:MGI:4439828]	-	-	-	-	GO:0005615//extracellular space	-	GO:0002377//immunoglobulin production;GO:0006955//immune response
ENSMUSG00000079457	17	12	2	79	165	151	0.55	0.41	0.05	2.38	6.02	4.92	0.336666666666667	4.44	3.72116688431947	7.50197591039698e-11	3.59087115591688e-09	Gm7609	predicted pseudogene 7609 [Source:MGI Symbol;Acc:MGI:3644536]	-	-	-	-	GO:0016021//integral component of membrane	-	-
ENSMUSG00000037337	292	398	344	762	806	642	4.52	6.10	5.55	11.26	13.85	10.48	5.39	11.8633333333333	1.13815225403612	7.63206892072368e-11	3.64226860547036e-09	Map4k1	mitogen-activated protein kinase kinase kinase kinase 1 [Source:MGI Symbol;Acc:MGI:1346882]	Environmental Information Processing	Signal transduction	ko04010//MAPK signaling pathway	K04408	GO:0005737//cytoplasm	GO:0000166//nucleotide binding;GO:0004672//protein kinase activity;GO:0004674//protein serine/threonine kinase activity;GO:0005515//protein binding;GO:0005524//ATP binding;GO:0008349//MAP kinase kinase kinase kinase activity;GO:0016301//kinase activity;GO:0016740//transferase activity	GO:0000165//MAPK cascade;GO:0000185//activation of MAPKKK activity;GO:0006468//protein phosphorylation;GO:0007257//activation of JUN kinase activity;GO:0007346//regulation of mitotic cell cycle;GO:0008283//cell proliferation;GO:0016310//phosphorylation;GO:0018105//peptidyl-serine phosphorylation;GO:0023014//signal transduction by protein phosphorylation;GO:0031098//stress-activated protein kinase…
ENSMUSG00000096464	29	25	17	6139	3145	237	3.48	2.97	2.12	702.24	418.10	29.94	2.85666666666667	383.426666666667	7.06847416361774	7.7569906774909e-11	3.67998063649605e-09	Ighv2-2	immunoglobulin heavy variable 2-2 [Source:MGI Symbol;Acc:MGI:4439894]	Environmental Information Processing;Human Diseases;Human Diseases;Environmental Information Processing;Cellular Processes;Human Diseases;Human Diseases;Environmental Information Processing;Human Diseases;Human Diseases;Human Diseases;Environmental Information Processing;Organismal Systems;Human Diseases;Human Diseases;Organismal Systems;Organismal Systems;Human Diseases;Organismal Systems;Human …	Signal transduction;Infectious diseases;Infectious diseases;Signal transduction;Transport and catabolism;Cancers;Infectious diseases;Signal transduction;Immune diseases;Infectious diseases;Infectious diseases;Signal transduction;Immune system;Immune diseases;Cardiovascular diseases;Immune system;Immune system;Cardiovascular diseases;Immune system;Immune diseases;Infectious diseases;Immune system;…	ko04151//PI3K-Akt signaling pathway;ko05169//Epstein-Barr virus infection;ko05130//Pathogenic Escherichia coli infection;ko04020//Calcium signaling pathway;ko04145//Phagosome;ko05202//Transcriptional misregulation in cancers;ko05152//Tuberculosis;ko04072//Phospholipase D signaling pathway;ko05322//Systemic lupus erythematosus;ko05150//Staphylococcus aureus infection;ko05146//Amoebiasis;ko04064//N…	K06856;K06856;K06856;K06856;K06856;K06856;K06856;K06856;K06856;K06856;K06856;K06856;K06856;K06856;K06856;K06856;K06856;K06856;K06856;K06856;K06856;K06856;K06856;K06856;K06856;K06856;K06856	GO:0009897//external side of plasma membrane;GO:0042571//immunoglobulin complex, circulating	GO:0003823//antigen binding;GO:0034987//immunoglobulin receptor binding	GO:0006910//phagocytosis, recognition;GO:0006911//phagocytosis, engulfment;GO:0006958//complement activation, classical pathway;GO:0042742//defense response to bacterium;GO:0045087//innate immune response;GO:0050853//B cell receptor signaling pathway;GO:0050871//positive regulation of B cell activation
ENSMUSG00000079017	735	742	879	2786	6100	6879	66.97	66.95	83.46	242.29	616.47	660.63	72.46	506.463333333333	2.80520111442467	7.86270041735203e-11	3.71912687882713e-09	Ifi27l2a	interferon, alpha-inducible protein 27 like 2A [Source:MGI Symbol;Acc:MGI:1924183]	-	-	-	-	GO:0005634//nucleus;GO:0005637//nuclear inner membrane;GO:0005739//mitochondrion;GO:0016020//membrane;GO:0016021//integral component of membrane	GO:0003674//molecular_function	GO:0007568//aging;GO:0009615//response to virus;GO:0097190//apoptotic signaling pathway
ENSMUSG00000054520	361	358	328	646	868	743	5.44	5.59	5.20	8.89	14.10	11.30	5.41	11.43	1.07912490438766	8.47064405820561e-11	3.98810786337146e-09	Sh3bp2	SH3-domain binding protein 2 [Source:MGI Symbol;Acc:MGI:1346349]	Organismal Systems	Immune system	ko04650//Natural killer cell mediated cytotoxicity	K07984	-	GO:0001784//phosphotyrosine binding;GO:0005070//SH3/SH2 adaptor activity	GO:0007165//signal transduction;GO:0009967//positive regulation of signal transduction
ENSMUSG00000008461	2	2	2	40	76	54	0.04	0.03	0.05	0.73	1.38	0.93	0.04	1.01333333333333	4.66296501272242	8.4811024721526e-11	3.98810786337146e-09	Fut1	fucosyltransferase 1 [Source:MGI Symbol;Acc:MGI:109375]	Metabolism;Metabolism;Metabolism	Global and overview maps;Glycan biosynthesis and metabolism;Glycan biosynthesis and metabolism	ko01100//Metabolic pathways;ko00601//Glycosphingolipid biosynthesis - lacto and neolacto series;ko00603//Glycosphingolipid biosynthesis - globo and isoglobo series	K00718;K00718;K00718	GO:0005794//Golgi apparatus;GO:0016020//membrane;GO:0032580//Golgi cisterna membrane	GO:0008107//galactoside 2-alpha-L-fucosyltransferase activity;GO:0016740//transferase activity;GO:0016757//transferase activity, transferring glycosyl groups	GO:0001954//positive regulation of cell-matrix adhesion;GO:0005975//carbohydrate metabolic process;GO:0006486//protein glycosylation;GO:0010595//positive regulation of endothelial cell migration;GO:0036065//fucosylation;GO:1903672//positive regulation of sprouting angiogenesis;GO:1904906//positive regulation of endothelial cell-matrix adhesion via fibronectin
ENSMUSG00000029322	802	1039	686	1805	1801	2674	45.34	58.19	40.42	97.32	113.11	159.51	47.9833333333333	123.313333333333	1.36172351232205	9.6594811998977e-11	4.51573705657025e-09	Plac8	placenta-specific 8 [Source:MGI Symbol;Acc:MGI:2445289]	-	-	-	-	GO:0005634//nucleus	GO:0003682//chromatin binding;GO:0005515//protein binding	GO:0008284//positive regulation of cell proliferation;GO:0009409//response to cold;GO:0040015//negative regulation of multicellular organism growth;GO:0042742//defense response to bacterium;GO:0043066//negative regulation of apoptotic process;GO:0045944//positive regulation of transcription from RNA polymerase II promoter;GO:0050873//brown fat cell differentiation
ENSMUSG00000025270	6575	5838	5063	3386	2351	1982	138.25	122.14	110.97	67.93	54.80	44.01	123.786666666667	55.58	-1.15521818742277	9.8665626936367e-11	4.59913758117629e-09	Alas2	aminolevulinic acid synthase 2, erythroid [Source:MGI Symbol;Acc:MGI:87990]	Metabolism;Metabolism;Metabolism	Global and overview maps;Metabolism of cofactors and vitamins;Amino acid metabolism	ko01100//Metabolic pathways;ko00860//Porphyrin and chlorophyll metabolism;ko00260//Glycine, serine and threonine metabolism	K00643;K00643;K00643	GO:0005623//cell;GO:0005739//mitochondrion;GO:0005743//mitochondrial inner membrane;GO:0005759//mitochondrial matrix	GO:0003824//catalytic activity;GO:0003870//5-aminolevulinate synthase activity;GO:0016594//glycine binding;GO:0016740//transferase activity;GO:0016746//transferase activity, transferring acyl groups;GO:0030170//pyridoxal phosphate binding;GO:0050662//coenzyme binding	GO:0001666//response to hypoxia;GO:0006778//porphyrin-containing compound metabolic process;GO:0006782//protoporphyrinogen IX biosynthetic process;GO:0006783//heme biosynthetic process;GO:0006879//cellular iron ion homeostasis;GO:0009058//biosynthetic process;GO:0030218//erythrocyte differentiation;GO:0033014//tetrapyrrole biosynthetic process;GO:0042541//hemoglobin biosynthetic process
ENSMUSG00000039997	1095	1133	895	2060	4193	3256	15.65	15.89	12.94	27.97	68.49	50.45	14.8266666666667	48.97	1.72370390870641	1.11043944327213e-10	5.13138226883822e-09	Ifi203	interferon activated gene 203 [Source:MGI Symbol;Acc:MGI:96428]	Organismal Systems	Immune system	ko04621//NOD-like receptor signaling pathway	K20914	-	-	GO:0002218//activation of innate immune response;GO:0035458//cellular response to interferon-beta
ENSMUSG00000052160	736	974	730	1831	1307	1811	15.67	20.53	16.18	37.20	30.86	40.63	17.46	36.23	1.05313124682385	1.21912738810701e-10	5.56454854100061e-09	Pld4	phospholipase D family, member 4 [Source:MGI Symbol;Acc:MGI:2144765]	Metabolism;Metabolism;Metabolism	Global and overview maps;Lipid metabolism;Lipid metabolism	ko01100//Metabolic pathways;ko00564//Glycerophospholipid metabolism;ko00565//Ether lipid metabolism	K16860;K16860;K16860	GO:0005634//nucleus;GO:0005768//endosome;GO:0005769//early endosome;GO:0005783//endoplasmic reticulum;GO:0005789//endoplasmic reticulum membrane;GO:0005794//Golgi apparatus;GO:0016020//membrane;GO:0016021//integral component of membrane;GO:0031410//cytoplasmic vesicle;GO:0032588//trans-Golgi network membrane;GO:0045335//phagocytic vesicle	GO:0003824//catalytic activity;GO:0004518//nuclease activity;GO:0004527//exonuclease activity;GO:0005515//protein binding;GO:0016787//hydrolase activity;GO:0045145//single-stranded DNA 5'-3' exodeoxyribonuclease activity	GO:0002244//hematopoietic progenitor cell differentiation;GO:0002376//immune system process;GO:0006259//DNA metabolic process;GO:0006909//phagocytosis;GO:0006954//inflammatory response;GO:0045087//innate immune response;GO:0090305//nucleic acid phosphodiester bond hydrolysis;GO:1900015//regulation of cytokine production involved in inflammatory response
ENSMUSG00000026822	1509	994	1568	4516	3113	2827	69.43	45.19	74.74	198.24	158.83	136.99	63.12	164.686666666667	1.38355464610272	1.22152858523992e-10	5.56454854100061e-09	Lcn2	lipocalin 2 [Source:MGI Symbol;Acc:MGI:96757]	Organismal Systems	Immune system	ko04657//IL-17 signaling pathway	K21129	GO:0005576//extracellular region;GO:0005615//extracellular space;GO:0005623//cell;GO:0005829//cytosol;GO:0031410//cytoplasmic vesicle;GO:0060205//cytoplasmic membrane-bounded vesicle lumen	GO:0002020//protease binding;GO:0005506//iron ion binding;GO:0005515//protein binding;GO:0036094//small molecule binding;GO:0042802//identical protein binding;GO:1903981//enterobactin binding	GO:0002376//immune system process;GO:0006811//ion transport;GO:0006915//apoptotic process;GO:0006979//response to oxidative stress;GO:0009615//response to virus;GO:0009617//response to bacterium;GO:0009635//response to herbicide;GO:0010046//response to mycotoxin;GO:0010628//positive regulation of gene expression;GO:0015891//siderophore transport;GO:0031346//positive regulation of cell projection …
ENSMUSG00000074802	78	65	63	250	270	162	0.70	0.80	1.69	3.77	6.14	3.54	1.06333333333333	4.48333333333333	2.07597784367912	1.3835530523109e-10	6.26741579406016e-09	Gas2l3	growth arrest-specific 2 like 3 [Source:MGI Symbol;Acc:MGI:1918780]	-	-	-	-	GO:0005856//cytoskeleton;GO:0015629//actin cytoskeleton;GO:0015630//microtubule cytoskeleton	GO:0003779//actin binding;GO:0005515//protein binding;GO:0008017//microtubule binding	GO:0000226//microtubule cytoskeleton organization;GO:0030036//actin cytoskeleton organization
ENSMUSG00000076508	4	4	7	401	97	1446	0.51	0.47	0.86	45.03	12.69	179.10	0.613333333333333	78.94	7.00794134855725	1.38363903404883e-10	6.26741579406016e-09	Igkv17-127	immunoglobulin kappa variable 17-127 [Source:MGI Symbol;Acc:MGI:3646891]	-	-	-	-	GO:0005615//extracellular space	-	GO:0002377//immunoglobulin production;GO:0006955//immune response
ENSMUSG00000021880	81	75	67	206	160	226	2.80	2.36	2.05	7.09	6.44	7.69	2.40333333333333	7.07333333333333	1.55735349167394	1.39163786097274e-10	6.28589101428111e-09	Rnase6	ribonuclease, RNase A family, 6 [Source:MGI Symbol;Acc:MGI:1925666]	-	-	-	-	GO:0005615//extracellular space;GO:0031410//cytoplasmic vesicle	GO:0003676//nucleic acid binding;GO:0004518//nuclease activity;GO:0004519//endonuclease activity;GO:0004540//ribonuclease activity;GO:0016787//hydrolase activity	GO:0019731//antibacterial humoral response;GO:0045087//innate immune response;GO:0050829//defense response to Gram-negative bacterium;GO:0050830//defense response to Gram-positive bacterium;GO:0051607//defense response to virus;GO:0090501//RNA phosphodiester bond hydrolysis
ENSMUSG00000032122	277	274	246	788	1396	640	2.88	2.76	2.59	7.92	15.76	7.00	2.74333333333333	10.2266666666667	1.89833414708131	1.52342007034793e-10	6.82347509162824e-09	Slc37a2	solute carrier family 37 (glycerol-3-phosphate transporter), member 2 [Source:MGI Symbol;Acc:MGI:1929693]	-	-	-	-	GO:0005783//endoplasmic reticulum;GO:0005789//endoplasmic reticulum membrane;GO:0016020//membrane;GO:0016021//integral component of membrane;GO:0030176//integral component of endoplasmic reticulum membrane	GO:0015169//glycerol-3-phosphate transmembrane transporter activity;GO:0015297//antiporter activity;GO:0022857//transmembrane transporter activity;GO:0061513//glucose 6-phosphate:inorganic phosphate antiporter activity	GO:0006072//glycerol-3-phosphate metabolic process;GO:0006127//glycerophosphate shuttle;GO:0008643//carbohydrate transport;GO:0015760//glucose-6-phosphate transport;GO:0015794//glycerol-3-phosphate transport;GO:0035435//phosphate ion transmembrane transport;GO:0055085//transmembrane transport
ENSMUSG00000020914	581	410	373	973	1129	1023	5.99	3.93	3.80	10.43	11.91	11.05	4.57333333333333	11.13	1.2831356118903	1.76718690645221e-10	7.87134501248921e-09	Top2a	topoisomerase (DNA) II alpha [Source:MGI Symbol;Acc:MGI:98790]	Human Diseases	Drug resistance	ko01524//Platinum drug resistance	K03164	GO:0000228//nuclear chromosome;GO:0000793//condensed chromosome;GO:0005634//nucleus;GO:0005654//nucleoplasm;GO:0005730//nucleolus;GO:0005737//cytoplasm;GO:0005814//centriole;GO:0009330//DNA topoisomerase complex (ATP-hydrolyzing);GO:0019035//viral integration complex;GO:0032991//macromolecular complex;GO:1990904//ribonucleoprotein complex	GO:0000166//nucleotide binding;GO:0000287//magnesium ion binding;GO:0003677//DNA binding;GO:0003682//chromatin binding;GO:0003916//DNA topoisomerase activity;GO:0003918//DNA topoisomerase type II (ATP-hydrolyzing) activity;GO:0005080//protein kinase C binding;GO:0005515//protein binding;GO:0005524//ATP binding;GO:0008022//protein C-terminus binding;GO:0008094//DNA-dependent ATPase activity;GO:000…	GO:0000712//resolution of meiotic recombination intermediates;GO:0000819//sister chromatid segregation;GO:0002244//hematopoietic progenitor cell differentiation;GO:0006259//DNA metabolic process;GO:0006265//DNA topological change;GO:0006266//DNA ligation;GO:0006974//cellular response to DNA damage stimulus;GO:0007059//chromosome segregation;GO:0007143//female meiotic division;GO:0030261//chromoso…
ENSMUSG00000018774	583	632	580	1722	2273	1127	21.57	23.75	23.48	58.50	92.71	42.93	22.9333333333333	64.7133333333333	1.49661692702372	1.79247776587623e-10	7.94264912825036e-09	Cd68	CD68 antigen [Source:MGI Symbol;Acc:MGI:88342]	Cellular Processes	Transport and catabolism	ko04142//Lysosome	K06501	GO:0005623//cell;GO:0005764//lysosome;GO:0005765//lysosomal membrane;GO:0005768//endosome;GO:0005886//plasma membrane;GO:0010008//endosome membrane;GO:0016020//membrane;GO:0016021//integral component of membrane;GO:0031902//late endosome membrane	-	GO:0002437//inflammatory response to antigenic stimulus;GO:0002605//negative regulation of dendritic cell antigen processing and presentation;GO:0007568//aging;GO:0031669//cellular response to nutrient levels;GO:0035425//autocrine signaling;GO:0071222//cellular response to lipopolysaccharide;GO:0071310//cellular response to organic substance;GO:0072594//establishment of protein localization to or…
ENSMUSG00000050370	46	55	51	145	128	160	1.40	1.66	1.62	4.21	4.32	5.13	1.56	4.55333333333333	1.54537704870668	2.00929348876892e-10	8.80301122743432e-09	Ch25h	cholesterol 25-hydroxylase [Source:MGI Symbol;Acc:MGI:1333869]	Metabolism	Lipid metabolism	ko00120//Primary bile acid biosynthesis	K10223	GO:0005783//endoplasmic reticulum;GO:0005789//endoplasmic reticulum membrane;GO:0016020//membrane;GO:0016021//integral component of membrane	GO:0000254//C-4 methylsterol oxidase activity;GO:0001567//cholesterol 25-hydroxylase activity;GO:0004497//monooxygenase activity;GO:0005506//iron ion binding;GO:0008395//steroid hydroxylase activity;GO:0016491//oxidoreductase activity;GO:0046872//metal ion binding	GO:0006629//lipid metabolic process;GO:0006694//steroid biosynthetic process;GO:0008202//steroid metabolic process;GO:0008203//cholesterol metabolic process;GO:0008610//lipid biosynthetic process;GO:0016126//sterol biosynthetic process;GO:0035754//B cell chemotaxis;GO:0055114//oxidation-reduction process
ENSMUSG00000031155	223	176	172	392	389	379	4.60	3.60	3.70	7.72	8.90	8.24	3.96666666666667	8.28666666666667	1.06286472285718	2.18912916539565e-10	9.56476462319327e-09	Pim2	proviral integration site 2 [Source:MGI Symbol;Acc:MGI:97587]	Human Diseases;Human Diseases	Cancers;Cancers	ko05200//Pathways in cancer;ko05221//Acute myeloid leukemia	K08806;K08806	-	GO:0000166//nucleotide binding;GO:0004672//protein kinase activity;GO:0004674//protein serine/threonine kinase activity;GO:0005524//ATP binding	GO:0006468//protein phosphorylation;GO:0043066//negative regulation of apoptotic process
ENSMUSG00000004707	215	241	194	585	693	420	3.72	4.32	3.59	10.04	13.82	7.94	3.87666666666667	10.6	1.4511756686985	2.30198386413765e-10	1.00033363852161e-08	Ly9	lymphocyte antigen 9 [Source:MGI Symbol;Acc:MGI:96885]	-	-	-	-	GO:0005886//plasma membrane;GO:0009986//cell surface;GO:0016020//membrane;GO:0016021//integral component of membrane	-	GO:0002250//adaptive immune response;GO:0002376//immune system process;GO:0007155//cell adhesion;GO:0032740//positive regulation of interleukin-17 production;GO:0045087//innate immune response;GO:0072540//T-helper 17 cell lineage commitment
ENSMUSG00000002227	427	408	441	728	904	912	5.38	7.11	6.96	11.17	16.42	13.16	6.48333333333333	13.5833333333333	1.06702990413225	2.32913905907441e-10	1.00939850843941e-08	Mov10	Mov10 RISC complex RNA helicase [Source:MGI Symbol;Acc:MGI:97054]	-	-	-	-	GO:0000932//cytoplasmic mRNA processing body;GO:0005634//nucleus;GO:0005737//cytoplasm;GO:0005829//cytosol;GO:0010494//cytoplasmic stress granule;GO:0019034//viral replication complex;GO:0036464//cytoplasmic ribonucleoprotein granule;GO:0043186//P granule	GO:0000166//nucleotide binding;GO:0003723//RNA binding;GO:0003724//RNA helicase activity;GO:0004386//helicase activity;GO:0005515//protein binding;GO:0005524//ATP binding;GO:0016787//hydrolase activity;GO:0032574//5'-3' RNA helicase activity	GO:0010526//negative regulation of transposition, RNA-mediated;GO:0031047//gene silencing by RNA;GO:0035194//posttranscriptional gene silencing by RNA;GO:0035195//gene silencing by miRNA;GO:0035279//mRNA cleavage involved in gene silencing by miRNA;GO:0051607//defense response to virus;GO:0061014//positive regulation of mRNA catabolic process;GO:0061158//3'-UTR-mediated mRNA destabilization
ENSMUSG00000053063	196	290	203	515	480	500	3.30	4.84	3.57	8.29	8.98	8.89	3.90333333333333	8.72	1.15962146499687	2.50517453226558e-10	1.07695639744983e-08	Clec12a	C-type lectin domain family 12, member a [Source:MGI Symbol;Acc:MGI:3040968]	-	-	-	-	GO:0016020//membrane;GO:0016021//integral component of membrane	-	-
ENSMUSG00000008193	89	82	47	304	455	218	1.73	1.41	0.74	4.39	8.43	3.69	1.29333333333333	5.50333333333333	2.08921156272613	2.58760399239827e-10	1.10941791492263e-08	Spib	Spi-B transcription factor (Spi-1/PU.1 related) [Source:MGI Symbol;Acc:MGI:892986]	-	-	-	-	GO:0005634//nucleus;GO:0005667//transcription factor complex	GO:0000978//RNA polymerase II core promoter proximal region sequence-specific DNA binding;GO:0000981//RNA polymerase II transcription factor activity, sequence-specific DNA binding;GO:0001228//transcriptional activator activity, RNA polymerase II transcription regulatory region sequence-specific binding;GO:0003677//DNA binding;GO:0003700//transcription factor activity, sequence-specific DNA bindi…	GO:0006355//regulation of transcription, DNA-templated;GO:0006357//regulation of transcription from RNA polymerase II promoter;GO:0030154//cell differentiation;GO:0030225//macrophage differentiation;GO:0045944//positive regulation of transcription from RNA polymerase II promoter
ENSMUSG00000044583	434	312	245	762	902	845	4.91	5.75	2.87	9.50	13.84	12.79	4.51	12.0433333333333	1.4170354154559	2.81848086087396e-10	1.20197714372643e-08	Tlr7	toll-like receptor 7 [Source:MGI Symbol;Acc:MGI:2176882]	Human Diseases;Human Diseases;Organismal Systems	Infectious diseases;Infectious diseases;Immune system	ko05164//Influenza A;ko05162//Measles;ko04620//Toll-like receptor signaling pathway	K05404;K05404;K05404	GO:0005737//cytoplasm;GO:0005764//lysosome;GO:0005768//endosome;GO:0005783//endoplasmic reticulum;GO:0005789//endoplasmic reticulum membrane;GO:0005886//plasma membrane;GO:0016020//membrane;GO:0016021//integral component of membrane;GO:0031410//cytoplasmic vesicle;GO:0032009//early phagosome;GO:0043235//receptor complex;GO:0045335//phagocytic vesicle	GO:0003725//double-stranded RNA binding;GO:0003727//single-stranded RNA binding;GO:0004888//transmembrane signaling receptor activity;GO:0005515//protein binding;GO:0008144//drug binding;GO:0035197//siRNA binding;GO:0038187//pattern recognition receptor activity	GO:0001774//microglial cell activation;GO:0001932//regulation of protein phosphorylation;GO:0002224//toll-like receptor signaling pathway;GO:0002376//immune system process;GO:0002755//MyD88-dependent toll-like receptor signaling pathway;GO:0006954//inflammatory response;GO:0006955//immune response;GO:0007165//signal transduction;GO:0007249//I-kappaB kinase/NF-kappaB signaling;GO:0007252//I-kappaB…
ENSMUSG00000050967	26	18	22	129	202	83	0.18	0.12	0.16	0.85	1.55	0.61	0.153333333333333	1.00333333333333	2.71005772070269	3.06544308558804e-10	1.30382970497094e-08	Creg2	cellular repressor of E1A-stimulated genes 2 [Source:MGI Symbol;Acc:MGI:1928333]	-	-	-	-	GO:0005576//extracellular region;GO:0005615//extracellular space;GO:0005783//endoplasmic reticulum;GO:0005794//Golgi apparatus	GO:0003674//molecular_function;GO:0048037//cofactor binding	GO:0008150//biological_process
ENSMUSG00000001128	370	298	241	633	611	721	9.54	7.61	6.48	16.42	17.95	20.08	7.87666666666667	18.15	1.20431241963042	3.09634694540164e-10	1.31349003358506e-08	Cfp	complement factor properdin [Source:MGI Symbol;Acc:MGI:97545]	Human Diseases	Infectious diseases	ko05168//Herpes simplex infection	K15412	GO:0005576//extracellular region;GO:0005615//extracellular space;GO:0030141//secretory granule	-	GO:0002376//immune system process;GO:0006957//complement activation, alternative pathway;GO:0045087//innate immune response
ENSMUSG00000073940	542	469	406	236	166	133	32.50	27.88	25.37	13.53	11.03	8.38	28.5833333333333	10.98	-1.38029611622118	3.28402313980167e-10	1.38577134333473e-08	Hbb-bt	hemoglobin, beta adult t chain [Source:MGI Symbol;Acc:MGI:5474850]	Human Diseases;Human Diseases	Infectious diseases;Infectious diseases	ko05143//African trypanosomiasis;ko05144//Malaria	K13823;K13823	GO:0005615//extracellular space;GO:0005833//hemoglobin complex;GO:0031838//haptoglobin-hemoglobin complex	GO:0004601//peroxidase activity;GO:0005344//oxygen transporter activity;GO:0019825//oxygen binding;GO:0020037//heme binding;GO:0030492//hemoglobin binding;GO:0031720//haptoglobin binding;GO:0031721//hemoglobin alpha binding;GO:0031722//hemoglobin beta binding;GO:0043177//organic acid binding;GO:0044877//macromolecular complex binding;GO:0046872//metal ion binding	GO:0015671//oxygen transport;GO:0042744//hydrogen peroxide catabolic process;GO:0098869//cellular oxidant detoxification
ENSMUSG00000067341	16	27	20	138	144	73	0.20	0.33	0.26	1.64	1.99	0.96	0.263333333333333	1.53	2.53856959523671	3.87961200402957e-10	1.62852299697943e-08	H2-Eb2	histocompatibility 2, class II antigen E beta2 [Source:MGI Symbol;Acc:MGI:95902]	Human Diseases;Human Diseases;Cellular Processes;Human Diseases;Human Diseases;Human Diseases;Human Diseases;Human Diseases;Organismal Systems;Human Diseases;Human Diseases;Human Diseases;Human Diseases;Human Diseases;Environmental Information Processing;Organismal Systems;Human Diseases;Human Diseases;Organismal Systems;Organismal Systems;Organismal Systems;Human Diseases;Human Diseases;Human Di…	Infectious diseases;Infectious diseases;Transport and catabolism;Infectious diseases;Immune diseases;Infectious diseases;Infectious diseases;Immune diseases;Immune system;Cardiovascular diseases;Immune diseases;Infectious diseases;Infectious diseases;Immune diseases;Signaling molecules and interaction;Immune system;Immune diseases;Infectious diseases;Immune system;Immune system;Immune system;Endo…	ko05168//Herpes simplex infection;ko05169//Epstein-Barr virus infection;ko04145//Phagosome;ko05152//Tuberculosis;ko05322//Systemic lupus erythematosus;ko05150//Staphylococcus aureus infection;ko05166//HTLV-I infection;ko05323//Rheumatoid arthritis;ko04640//Hematopoietic cell lineage;ko05416//Viral myocarditis;ko05320//Autoimmune thyroid disease;ko05140//Leishmaniasis;ko05164//Influenza A;ko05330/…	K06752;K06752;K06752;K06752;K06752;K06752;K06752;K06752;K06752;K06752;K06752;K06752;K06752;K06752;K06752;K06752;K06752;K06752;K06752;K06752;K06752;K06752;K06752;K06752	GO:0016020//membrane;GO:0016021//integral component of membrane;GO:0042613//MHC class II protein complex	-	GO:0006955//immune response;GO:0019882//antigen processing and presentation
ENSMUSG00000091649	83	71	54	179	355	309	2.94	2.50	2.01	6.07	14.02	11.62	2.48333333333333	10.57	2.08962554675432	3.99808168100539e-10	1.67387048968463e-08	Phf11b	PHD finger protein 11B [Source:MGI Symbol;Acc:MGI:3645789]	Metabolism;Metabolism	Global and overview maps;Amino acid metabolism	ko01100//Metabolic pathways;ko00310//Lysine degradation	K18494;K18494	GO:0005654//nucleoplasm;GO:0031965//nuclear membrane	GO:0003674//molecular_function;GO:0046872//metal ion binding	GO:0008150//biological_process
ENSMUSG00000024677	539	521	336	1001	969	1030	13.13	12.12	8.58	22.90	26.06	26.12	11.2766666666667	25.0266666666667	1.15012547303688	4.14223280363687e-10	1.72970580745618e-08	Ms4a6b	membrane-spanning 4-domains, subfamily A, member 6B [Source:MGI Symbol;Acc:MGI:1917024]	-	-	-	-	GO:0005575//cellular_component;GO:0016020//membrane;GO:0016021//integral component of membrane	GO:0003674//molecular_function	GO:0008150//biological_process
ENSMUSG00000002699	147	213	157	395	377	358	2.94	4.53	2.74	6.50	10.42	8.25	3.40333333333333	8.39	1.30172235028318	4.58196045341369e-10	1.89849446693769e-08	Lcp2	lymphocyte cytosolic protein 2 [Source:MGI Symbol;Acc:MGI:1321402]	Organismal Systems;Environmental Information Processing;Organismal Systems;Human Diseases;Organismal Systems;Organismal Systems;Organismal Systems	Immune system;Signal transduction;Immune system;Infectious disease: bacterial;Development;Immune system;Immune system	ko04650//Natural killer cell mediated cytotoxicity;ko04015//Rap1 signaling pathway;ko04664//Fc epsilon RI signaling pathway;ko05135//Yersinia infection;ko04380//Osteoclast differentiation;ko04611//Platelet activation;ko04660//T cell receptor signaling pathway	K07361;K07361;K07361;K07361;K07361;K07361;K07361	GO:0005737//cytoplasm;GO:0005829//cytosol;GO:0005911//cell-cell junction;GO:0036398//TCR signalosome;GO:0044853//plasma membrane raft	GO:0005515//protein binding	GO:0007169//transmembrane receptor protein tyrosine kinase signaling pathway;GO:0035556//intracellular signal transduction;GO:0045576//mast cell activation;GO:0045860//positive regulation of protein kinase activity;GO:0050663//cytokine secretion;GO:0050852//T cell receptor signaling pathway
ENSMUSG00000015947	106	126	132	266	351	445	1.73	2.03	2.24	4.38	7.86	9.24	2	7.16	1.83995958748953	4.96270836150954e-10	2.05095434476303e-08	Fcgr1	Fc receptor, IgG, high affinity I [Source:MGI Symbol;Acc:MGI:95498]	Cellular Processes;Human Diseases;Human Diseases;Human Diseases;Human Diseases;Organismal Systems;Organismal Systems;Human Diseases;Organismal Systems;Human Diseases	Transport and catabolism;Cancers;Infectious diseases;Immune diseases;Infectious diseases;Immune system;Immune system;Infectious diseases;Development;Cancers	ko04145//Phagosome;ko05202//Transcriptional misregulation in cancers;ko05152//Tuberculosis;ko05322//Systemic lupus erythematosus;ko05150//Staphylococcus aureus infection;ko04640//Hematopoietic cell lineage;ko04666//Fc gamma R-mediated phagocytosis;ko05140//Leishmaniasis;ko04380//Osteoclast differentiation;ko05221//Acute myeloid leukemia	K06498;K06498;K06498;K06498;K06498;K06498;K06498;K06498;K06498;K06498	GO:0005886//plasma membrane;GO:0009897//external side of plasma membrane;GO:0016020//membrane;GO:0016021//integral component of membrane;GO:0045121//membrane raft	GO:0019770//IgG receptor activity;GO:0019864//IgG binding;GO:0031774//leukotriene receptor binding	GO:0001788//antibody-dependent cellular cytotoxicity;GO:0001798//positive regulation of type IIa hypersensitivity;GO:0001805//positive regulation of type III hypersensitivity;GO:0002376//immune system process;GO:0006898//receptor-mediated endocytosis;GO:0006910//phagocytosis, recognition;GO:0006911//phagocytosis, engulfment;GO:0007166//cell surface receptor signaling pathway;GO:0009617//response …
ENSMUSG00000027843	225	194	159	521	403	368	3.46	2.95	2.55	7.65	6.87	5.97	2.98666666666667	6.83	1.19334934695364	5.92251829501717e-10	2.43770443510688e-08	Ptpn22	protein tyrosine phosphatase, non-receptor type 22 (lymphoid) [Source:MGI Symbol;Acc:MGI:107170]	-	-	-	-	GO:0005634//nucleus;GO:0005737//cytoplasm;GO:0009898//cytoplasmic side of plasma membrane;GO:0048471//perinuclear region of cytoplasm	GO:0004721//phosphoprotein phosphatase activity;GO:0004725//protein tyrosine phosphatase activity;GO:0005515//protein binding;GO:0016787//hydrolase activity;GO:0016791//phosphatase activity;GO:0017124//SH3 domain binding;GO:0019900//kinase binding;GO:0031625//ubiquitin protein ligase binding;GO:1990782//protein tyrosine kinase binding	GO:0002230//positive regulation of defense response to virus by host;GO:0002376//immune system process;GO:0002685//regulation of leukocyte migration;GO:0006470//protein dephosphorylation;GO:0006914//autophagy;GO:0010507//negative regulation of autophagy;GO:0010628//positive regulation of gene expression;GO:0010629//negative regulation of gene expression;GO:0016311//dephosphorylation;GO:0030217//T…
ENSMUSG00000020017	39	11	24	181	131	123	0.97	0.21	0.61	3.13	3.17	1.83	0.596666666666667	2.71	2.18329576481077	5.9289350152272e-10	2.43770443510688e-08	Hal	histidine ammonia lyase [Source:MGI Symbol;Acc:MGI:96010]	Metabolism;Metabolism	Global and overview maps;Amino acid metabolism	ko01100//Metabolic pathways;ko00340//Histidine metabolism	K01745;K01745	GO:0005737//cytoplasm	GO:0003824//catalytic activity;GO:0004397//histidine ammonia-lyase activity;GO:0016829//lyase activity;GO:0016841//ammonia-lyase activity	GO:0006547//histidine metabolic process;GO:0006548//histidine catabolic process;GO:0019556//histidine catabolic process to glutamate and formamide;GO:0019557//histidine catabolic process to glutamate and formate
ENSMUSG00000008496	109	160	114	297	359	311	1.06	1.13	1.33	2.77	4.05	2.88	1.17333333333333	3.23333333333333	1.4624093184372	6.21548357620683e-10	2.54898412134211e-08	Pou2f2	POU domain, class 2, transcription factor 2 [Source:MGI Symbol;Acc:MGI:101897]	Human Diseases	Infectious diseases	ko05168//Herpes simplex infection	K09364	GO:0005634//nucleus;GO:0005654//nucleoplasm;GO:0005737//cytoplasm;GO:0043231//intracellular membrane-bounded organelle	GO:0000978//RNA polymerase II core promoter proximal region sequence-specific DNA binding;GO:0001228//transcriptional activator activity, RNA polymerase II transcription regulatory region sequence-specific binding;GO:0003677//DNA binding;GO:0003700//transcription factor activity, sequence-specific DNA binding;GO:0019904//protein domain specific binding;GO:0043565//sequence-specific DNA binding	GO:0002335//mature B cell differentiation;GO:0002380//immunoglobulin secretion involved in immune response;GO:0006355//regulation of transcription, DNA-templated;GO:0030154//cell differentiation;GO:0045893//positive regulation of transcription, DNA-templated;GO:0045944//positive regulation of transcription from RNA polymerase II promoter;GO:0048305//immunoglobulin secretion;GO:0048469//cell matur…
ENSMUSG00000089844	15	20	19	73	118	88	0.51	0.62	0.55	1.98	3.99	3.27	0.56	3.08	2.4594316186373	6.33611460569809e-10	2.57970444448434e-08	A530032D15Rik	RIKEN cDNA A530032D15Rik gene [Source:MGI Symbol;Acc:MGI:3037746]	-	-	-	-	GO:0005575//cellular_component;GO:0005634//nucleus;GO:0016604//nuclear body	GO:0003674//molecular_function	GO:0008150//biological_process
ENSMUSG00000024349	530	451	398	826	883	825	9.88	9.50	8.03	15.97	19.14	20.91	9.13666666666667	18.6733333333333	1.03123965524873	6.38472700472858e-10	2.58849331846183e-08	Sting1	stimulator of interferon response cGAMP interactor 1 [Source:MGI Symbol;Acc:MGI:1919762]	Human Diseases;Human Diseases;Human Diseases;Human Diseases;Organismal Systems;Organismal Systems;Organismal Systems	Infectious diseases;Infectious diseases;Infectious disease: viral;Infectious diseases;Immune system;Immune system;Immune system	ko05168//Herpes simplex infection;ko05163//Human cytomegalovirus infection;ko05170//Human immunodeficiency virus 1 infection;ko05131//Shigellosis;ko04621//NOD-like receptor signaling pathway;ko04622//RIG-I-like receptor signaling pathway;ko04623//Cytosolic DNA-sensing pathway	K12654;K12654;K12654;K12654;K12654;K12654;K12654	GO:0000421//autophagosome membrane;GO:0005654//nucleoplasm;GO:0005737//cytoplasm;GO:0005739//mitochondrion;GO:0005741//mitochondrial outer membrane;GO:0005768//endosome;GO:0005776//autophagosome;GO:0005777//peroxisome;GO:0005783//endoplasmic reticulum;GO:0005789//endoplasmic reticulum membrane;GO:0005794//Golgi apparatus;GO:0005829//cytosol;GO:0005886//plasma membrane;GO:0016020//membrane;GO:0016…	GO:0000166//nucleotide binding;GO:0005515//protein binding;GO:0008134//transcription factor binding;GO:0009055//electron carrier activity;GO:0016491//oxidoreductase activity;GO:0016625//oxidoreductase activity, acting on the aldehyde or oxo group of donors, iron-sulfur protein as acceptor;GO:0019901//protein kinase binding;GO:0031625//ubiquitin protein ligase binding;GO:0035438//cyclic-di-GMP bin…	GO:0000045//autophagosome assembly;GO:0002218//activation of innate immune response;GO:0002230//positive regulation of defense response to virus by host;GO:0002376//immune system process;GO:0006914//autophagy;GO:0010468//regulation of gene expression;GO:0016239//positive regulation of macroautophagy;GO:0022900//electron transport chain;GO:0031323//regulation of cellular metabolic process;GO:00320…
ENSMUSG00000043740	65	71	50	218	272	155	0.69	0.74	0.63	2.20	3.18	1.91	0.686666666666667	2.43	1.82327447714372	6.77005038202894e-10	2.72074581142441e-08	B430306N03Rik	RIKEN cDNA B430306N03 gene [Source:MGI Symbol;Acc:MGI:2443478]	-	-	-	-	GO:0009986//cell surface;GO:0016020//membrane;GO:0016021//integral component of membrane	GO:0038023//signaling receptor activity	GO:0045088//regulation of innate immune response
ENSMUSG00000026285	16	9	8	72	85	59	0.35	0.19	0.18	1.50	2.06	1.36	0.24	1.64	2.77258950389693	6.80627577340356e-10	2.72846580066315e-08	Pdcd1	programmed cell death 1 [Source:MGI Symbol;Acc:MGI:104879]	Environmental Information Processing;Organismal Systems;Human Diseases	Signaling molecules and interaction;Immune system;Cancer: overview	ko04514//Cell adhesion molecules (CAMs);ko04660//T cell receptor signaling pathway;ko05235//PD-L1 expression and PD-1 checkpoint pathway in cancer	K06744;K06744;K06744	GO:0005886//plasma membrane;GO:0009897//external side of plasma membrane;GO:0016020//membrane;GO:0016021//integral component of membrane	GO:0005515//protein binding	GO:0002250//adaptive immune response;GO:0002376//immune system process;GO:0002644//negative regulation of tolerance induction;GO:0006915//apoptotic process;GO:0043065//positive regulation of apoptotic process;GO:0043066//negative regulation of apoptotic process;GO:0050777//negative regulation of immune response;GO:0070234//positive regulation of T cell apoptotic process
ENSMUSG00000022180	120	57	86	337	319	241	1.24	0.59	0.92	3.32	3.65	2.63	0.916666666666667	3.2	1.8036027871965	7.60532241574308e-10	3.01114431941828e-08	Slc7a8	solute carrier family 7 (cationic amino acid transporter, y+ system), member 8 [Source:MGI Symbol;Acc:MGI:1355323]	Organismal Systems	Digestive system	ko04974//Protein digestion and absorption	K13781	GO:0005737//cytoplasm;GO:0005886//plasma membrane;GO:0016020//membrane;GO:0016021//integral component of membrane;GO:0016323//basolateral plasma membrane	GO:0005275//amine transmembrane transporter activity;GO:0015101//organic cation transmembrane transporter activity;GO:0015171//amino acid transmembrane transporter activity;GO:0015175//neutral amino acid transmembrane transporter activity;GO:0015179//L-amino acid transmembrane transporter activity;GO:0019534//toxin transporter activity;GO:0022857//transmembrane transporter activity	GO:0003333//amino acid transmembrane transport;GO:0006865//amino acid transport;GO:0015695//organic cation transport;GO:0015804//neutral amino acid transport;GO:0015807//L-amino acid transport;GO:0015837//amine transport;GO:0055085//transmembrane transport;GO:1901998//toxin transport;GO:1902475//L-alpha-amino acid transmembrane transport
ENSMUSG00000069793	131	97	93	246	568	523	1.24	1.07	1.10	2.65	7.04	5.90	1.13666666666667	5.19666666666667	2.19277728367361	7.93423532049713e-10	3.1336321025658e-08	Slfn9	schlafen 9 [Source:MGI Symbol;Acc:MGI:2445121]	-	-	-	-	GO:0005634//nucleus;GO:0005737//cytoplasm	GO:0000049//tRNA binding;GO:0000166//nucleotide binding;GO:0004518//nuclease activity;GO:0004519//endonuclease activity;GO:0004521//endoribonuclease activity;GO:0005524//ATP binding;GO:0008270//zinc ion binding;GO:0016787//hydrolase activity;GO:0046872//metal ion binding	GO:0051607//defense response to virus;GO:0090305//nucleic acid phosphodiester bond hydrolysis;GO:0090502//RNA phosphodiester bond hydrolysis, endonucleolytic
ENSMUSG00000060509	82	63	81	180	317	309	0.78	0.59	0.80	1.63	3.33	3.09	0.723333333333333	2.68333333333333	1.8912937405575	7.97625861686178e-10	3.14248911354739e-08	Xcr1	chemokine (C motif) receptor 1 [Source:MGI Symbol;Acc:MGI:1346338]	Environmental Information Processing;Organismal Systems;Environmental Information Processing	Signaling molecules and interaction;Immune system;Signaling molecules and interaction	ko04060//Cytokine-cytokine receptor interaction;ko04062//Chemokine signaling pathway;ko04061//Viral protein interaction with cytokine and cytokine receptor	K04193;K04193;K04193	GO:0005623//cell;GO:0005886//plasma membrane;GO:0009897//external side of plasma membrane;GO:0016020//membrane;GO:0016021//integral component of membrane	GO:0004930//G-protein coupled receptor activity;GO:0004950//chemokine receptor activity;GO:0016493//C-C chemokine receptor activity;GO:0019956//chemokine binding;GO:0019957//C-C chemokine binding	GO:0006935//chemotaxis;GO:0006955//immune response;GO:0007165//signal transduction;GO:0007186//G-protein coupled receptor signaling pathway;GO:0007204//positive regulation of cytosolic calcium ion concentration;GO:0019722//calcium-mediated signaling;GO:0034097//response to cytokine;GO:0051209//release of sequestered calcium ion into cytosol;GO:0060326//cell chemotaxis;GO:0070098//chemokine-mediat…
ENSMUSG00000025888	188	157	141	322	350	389	5.18	4.28	4.69	10.25	11.11	11.98	4.71666666666667	11.1133333333333	1.23645205126717	8.2406106586263e-10	3.238681174291e-08	Casp1	caspase 1 [Source:MGI Symbol;Acc:MGI:96544]	Human Diseases;Human Diseases;Human Diseases;Organismal Systems;Human Diseases;Cellular Processes;Human Diseases;Organismal Systems;Human Diseases;Organismal Systems;Human Diseases;Human Diseases	Infectious diseases;Infectious diseases;Infectious diseases;Immune system;Infectious diseases;Cell growth and death;Infectious disease: bacterial;Immune system;Infectious diseases;Immune system;Infectious diseases;Neurodegenerative diseases	ko05130//Pathogenic Escherichia coli infection;ko05131//Shigellosis;ko05132//Salmonella infection;ko04621//NOD-like receptor signaling pathway;ko05164//Influenza A;ko04217//Necroptosis;ko05135//Yersinia infection;ko04625//C-type lectin receptor signaling pathway;ko05133//Pertussis;ko04623//Cytosolic DNA-sensing pathway;ko05134//Legionellosis;ko05014//Amyotrophic lateral sclerosis (ALS)	K01370;K01370;K01370;K01370;K01370;K01370;K01370;K01370;K01370;K01370;K01370;K01370	GO:0005576//extracellular region;GO:0005634//nucleus;GO:0005737//cytoplasm;GO:0005739//mitochondrion;GO:0005829//cytosol;GO:0005886//plasma membrane;GO:0016020//membrane;GO:0032991//macromolecular complex;GO:0043005//neuron projection;GO:0072557//IPAF inflammasome complex;GO:0072558//NLRP1 inflammasome complex;GO:0072559//NLRP3 inflammasome complex;GO:0097169//AIM2 inflammasome complex;GO:0097179…	GO:0004175//endopeptidase activity;GO:0004197//cysteine-type endopeptidase activity;GO:0005515//protein binding;GO:0008233//peptidase activity;GO:0008234//cysteine-type peptidase activity;GO:0016787//hydrolase activity;GO:0019900//kinase binding;GO:0042802//identical protein binding;GO:0050700//CARD domain binding;GO:0097110//scaffold protein binding;GO:0097199//cysteine-type endopeptidase activi…	GO:0001666//response to hypoxia;GO:0001774//microglial cell activation;GO:0006508//proteolysis;GO:0006915//apoptotic process;GO:0006919//activation of cysteine-type endopeptidase activity involved in apoptotic process;GO:0007520//myoblast fusion;GO:0007613//memory;GO:0009617//response to bacterium;GO:0010506//regulation of autophagy;GO:0014070//response to organic cyclic compound;GO:0016485//prot…
ENSMUSG00000022456	134	121	139	262	280	314	1.43	1.59	1.65	3.25	3.91	3.59	1.55666666666667	3.58333333333333	1.20284220476716	8.74233536732163e-10	3.39807795113212e-08	Septin3	septin 3 [Source:MGI Symbol;Acc:MGI:1345148]	Human Diseases;Human Diseases	Infectious diseases;Infectious diseases	ko05131//Shigellosis;ko05100//Bacterial invasion of epithelial cells	K16938;K16938	GO:0005737//cytoplasm;GO:0005829//cytosol;GO:0005856//cytoskeleton;GO:0005940//septin ring;GO:0015630//microtubule cytoskeleton;GO:0030054//cell junction;GO:0031105//septin complex;GO:0032153//cell division site;GO:0042734//presynaptic membrane;GO:0043005//neuron projection;GO:0045202//synapse;GO:0098793//presynapse;GO:0099569//presynaptic cytoskeleton	GO:0000166//nucleotide binding;GO:0003924//GTPase activity;GO:0005515//protein binding;GO:0005525//GTP binding;GO:0042802//identical protein binding;GO:0060090//binding, bridging	GO:0007049//cell cycle;GO:0034613//cellular protein localization;GO:0051301//cell division;GO:0061640//cytoskeleton-dependent cytokinesis
ENSMUSG00000076674	3	4	5	89	176	27	0.36	0.42	0.55	9.10	20.94	3.02	0.443333333333333	11.02	4.63558857379113	8.76659738294009e-10	3.39807795113212e-08	Ighv3-8	immunoglobulin heavy variable V3-8 [Source:MGI Symbol;Acc:MGI:3645298]	Environmental Information Processing;Human Diseases;Human Diseases;Environmental Information Processing;Cellular Processes;Human Diseases;Human Diseases;Environmental Information Processing;Human Diseases;Human Diseases;Human Diseases;Environmental Information Processing;Organismal Systems;Human Diseases;Human Diseases;Organismal Systems;Organismal Systems;Human Diseases;Organismal Systems;Human …	Signal transduction;Infectious diseases;Infectious diseases;Signal transduction;Transport and catabolism;Cancers;Infectious diseases;Signal transduction;Immune diseases;Infectious diseases;Infectious diseases;Signal transduction;Immune system;Immune diseases;Cardiovascular diseases;Immune system;Immune system;Cardiovascular diseases;Immune system;Immune diseases;Infectious diseases;Immune system;…	ko04151//PI3K-Akt signaling pathway;ko05169//Epstein-Barr virus infection;ko05130//Pathogenic Escherichia coli infection;ko04020//Calcium signaling pathway;ko04145//Phagosome;ko05202//Transcriptional misregulation in cancers;ko05152//Tuberculosis;ko04072//Phospholipase D signaling pathway;ko05322//Systemic lupus erythematosus;ko05150//Staphylococcus aureus infection;ko05146//Amoebiasis;ko04064//N…	K06856;K06856;K06856;K06856;K06856;K06856;K06856;K06856;K06856;K06856;K06856;K06856;K06856;K06856;K06856;K06856;K06856;K06856;K06856;K06856;K06856;K06856;K06856;K06856;K06856;K06856;K06856	GO:0009897//external side of plasma membrane;GO:0042571//immunoglobulin complex, circulating	GO:0003823//antigen binding;GO:0034987//immunoglobulin receptor binding	GO:0006910//phagocytosis, recognition;GO:0006911//phagocytosis, engulfment;GO:0006958//complement activation, classical pathway;GO:0042742//defense response to bacterium;GO:0045087//innate immune response;GO:0050853//B cell receptor signaling pathway;GO:0050871//positive regulation of B cell activation
ENSMUSG00000040907	261	338	251	1003	1657	624	3.03	3.90	3.05	11.14	21.38	7.66	3.32666666666667	13.3933333333333	2.00936584339603	8.77333502818023e-10	3.39807795113212e-08	Atp1a3	ATPase, Na+/K+ transporting, alpha 3 polypeptide [Source:MGI Symbol;Acc:MGI:88107]	Environmental Information Processing;Environmental Information Processing;Organismal Systems;Organismal Systems;Organismal Systems;Organismal Systems;Organismal Systems;Organismal Systems;Organismal Systems;Organismal Systems;Organismal Systems;Organismal Systems;Organismal Systems;Organismal Systems;Organismal Systems;Organismal Systems;Organismal Systems;Organismal Systems	Signal transduction;Signal transduction;Circulatory system;Endocrine system;Digestive system;Endocrine system;Digestive system;Circulatory system;Endocrine system;Digestive system;Digestive system;Digestive system;Endocrine system;Excretory system;Digestive system;Digestive system;Excretory system;Excretory system	ko04024//cAMP signaling pathway;ko04022//cGMP - PKG signaling pathway;ko04261//Adrenergic signaling in cardiomyocytes;ko04919//Thyroid hormone signaling pathway;ko04972//Pancreatic secretion;ko04925//Aldosterone synthesis and secretion;ko04974//Protein digestion and absorption;ko04260//Cardiac muscle contraction;ko04911//Insulin secretion;ko04976//Bile secretion;ko04970//Salivary secretion;ko0497…	K01539;K01539;K01539;K01539;K01539;K01539;K01539;K01539;K01539;K01539;K01539;K01539;K01539;K01539;K01539;K01539;K01539;K01539	GO:0001917//photoreceptor inner segment;GO:0005623//cell;GO:0005634//nucleus;GO:0005737//cytoplasm;GO:0005783//endoplasmic reticulum;GO:0005794//Golgi apparatus;GO:0005886//plasma membrane;GO:0005890//sodium:potassium-exchanging ATPase complex;GO:0016020//membrane;GO:0016021//integral component of membrane;GO:0030424//axon;GO:0031090//organelle membrane;GO:0042383//sarcolemma;GO:0043025//neuronal…	GO:0000166//nucleotide binding;GO:0001540//beta-amyloid binding;GO:0005391//sodium:potassium-exchanging ATPase activity;GO:0005524//ATP binding;GO:0008556//potassium-transporting ATPase activity;GO:0031748//D1 dopamine receptor binding;GO:0043395//heparan sulfate proteoglycan binding;GO:0046872//metal ion binding;GO:0051087//chaperone binding;GO:0086037//sodium:potassium-exchanging ATPase activit…	GO:0006811//ion transport;GO:0006813//potassium ion transport;GO:0006814//sodium ion transport;GO:0006883//cellular sodium ion homeostasis;GO:0007613//memory;GO:0008344//adult locomotory behavior;GO:0008542//visual learning;GO:0010248//establishment or maintenance of transmembrane electrochemical gradient;GO:0021987//cerebral cortex development;GO:0030007//cellular potassium ion homeostasis;GO:00…
ENSMUSG00000044703	26	15	19	70	169	177	0.81	0.46	0.63	2.09	5.86	5.81	0.633333333333333	4.58666666666667	2.85640914637115	9.66249016843355e-10	3.73344650242969e-08	Phf11a	PHD finger protein 11A [Source:MGI Symbol;Acc:MGI:1918441]	Metabolism;Metabolism	Global and overview maps;Amino acid metabolism	ko01100//Metabolic pathways;ko00310//Lysine degradation	K18494;K18494	GO:0005634//nucleus;GO:0005654//nucleoplasm;GO:0031965//nuclear membrane	GO:0003674//molecular_function;GO:0046872//metal ion binding	GO:0050776//regulation of immune response
ENSMUSG00000046879	1269	1043	968	1983	3981	3949	25.22	20.36	19.75	37.55	87.17	82.43	21.7766666666667	69.05	1.66485827546542	9.93950160225612e-10	3.83124779308118e-08	Irgm1	immunity-related GTPase family M member 1 [Source:MGI Symbol;Acc:MGI:107567]	Human Diseases	Infectious diseases	ko05145//Toxoplasmosis	K14139	GO:0000139//Golgi membrane;GO:0000421//autophagosome membrane;GO:0001891//phagocytic cup;GO:0005764//lysosome;GO:0005765//lysosomal membrane;GO:0005768//endosome;GO:0005770//late endosome;GO:0005776//autophagosome;GO:0005783//endoplasmic reticulum;GO:0005789//endoplasmic reticulum membrane;GO:0005794//Golgi apparatus;GO:0005886//plasma membrane;GO:0016020//membrane;GO:0030670//phagocytic vesicle …	GO:0000166//nucleotide binding;GO:0003924//GTPase activity;GO:0005525//GTP binding;GO:0016787//hydrolase activity	GO:0000045//autophagosome assembly;GO:0002376//immune system process;GO:0006914//autophagy;GO:0006952//defense response;GO:0009617//response to bacterium;GO:0035458//cellular response to interferon-beta;GO:0045087//innate immune response;GO:0060335//positive regulation of interferon-gamma-mediated signaling pathway;GO:0071346//cellular response to interferon-gamma;GO:0075044//autophagy of host ce…
ENSMUSG00000031608	387	327	295	720	807	597	4.51	4.77	3.37	8.25	10.07	8.02	4.21666666666667	8.78	1.05811796067484	1.02102973439415e-09	3.90744911479959e-08	Galnt7	polypeptide N-acetylgalactosaminyltransferase 7 [Source:MGI Symbol;Acc:MGI:1349449]	Metabolism;Metabolism;Metabolism	Global and overview maps;Glycan biosynthesis and metabolism;Glycan biosynthesis and metabolism	ko01100//Metabolic pathways;ko00514//Other types of O-glycan biosynthesis;ko00512//Mucin type O-glycan biosynthesis	K00710;K00710;K00710	GO:0000139//Golgi membrane;GO:0005794//Golgi apparatus;GO:0016020//membrane;GO:0016021//integral component of membrane	GO:0004653//polypeptide N-acetylgalactosaminyltransferase activity;GO:0016740//transferase activity;GO:0016757//transferase activity, transferring glycosyl groups;GO:0030246//carbohydrate binding;GO:0046872//metal ion binding	GO:0006486//protein glycosylation;GO:0006493//protein O-linked glycosylation
ENSMUSG00000001739	287	309	310	172	126	129	6.47	6.84	7.29	3.71	3.14	3.16	6.86666666666667	3.33666666666667	-1.04120236323459	1.03278553173882e-09	3.94302761938856e-08	Cldn15	claudin 15 [Source:MGI Symbol;Acc:MGI:1913103]	Human Diseases;Cellular Processes;Human Diseases;Environmental Information Processing;Organismal Systems	Infectious diseases;Cellular community - eukaryotes;Infectious diseases;Signaling molecules and interaction;Immune system	ko05130//Pathogenic Escherichia coli infection;ko04530//Tight junction;ko05160//Hepatitis C;ko04514//Cell adhesion molecules (CAMs);ko04670//Leukocyte transendothelial migration	K06087;K06087;K06087;K06087;K06087	GO:0005886//plasma membrane;GO:0005923//bicellular tight junction;GO:0016020//membrane;GO:0016021//integral component of membrane;GO:0016328//lateral plasma membrane;GO:0030054//cell junction	GO:0005198//structural molecule activity;GO:0042802//identical protein binding	GO:0006811//ion transport;GO:0016338//calcium-independent cell-cell adhesion via plasma membrane cell-adhesion molecules
ENSMUSG00000029304	935	1209	1426	2369	2627	2400	27.92	35.82	44.38	67.83	87.22	75.62	36.04	76.89	1.0931969681992	1.04474420207366e-09	3.96978039816376e-08	Spp1	secreted phosphoprotein 1 [Source:MGI Symbol;Acc:MGI:98389]	Environmental Information Processing;Human Diseases;Cellular Processes;Environmental Information Processing;Organismal Systems;Environmental Information Processing;Organismal Systems	Signal transduction;Infectious diseases;Cellular community - eukaryotes;Signal transduction;Immune system;Signaling molecules and interaction;Endocrine system	ko04151//PI3K-Akt signaling pathway;ko05165//Human papillomavirus infection;ko04510//Focal adhesion;ko04371//Apelin signaling pathway;ko04620//Toll-like receptor signaling pathway;ko04512//ECM-receptor interaction;ko04929//GnRH secretion	K06250;K06250;K06250;K06250;K06250;K06250;K06250	GO:0005576//extracellular region;GO:0005615//extracellular space;GO:0005737//cytoplasm;GO:0005794//Golgi apparatus;GO:0031982//vesicle;GO:0042995//cell projection;GO:0045177//apical part of cell;GO:0048471//perinuclear region of cytoplasm	GO:0005125//cytokine activity;GO:0005178//integrin binding;GO:0050840//extracellular matrix binding	GO:0001503//ossification;GO:0001649//osteoblast differentiation;GO:0006710//androgen catabolic process;GO:0007155//cell adhesion;GO:0007165//signal transduction;GO:0010033//response to organic substance;GO:0010811//positive regulation of cell-substrate adhesion;GO:0030593//neutrophil chemotaxis;GO:0031214//biomineral tissue development;GO:0033280//response to vitamin D;GO:0043066//negative regula…
ENSMUSG00000082976	4	2	0	46	47	44	0.31	0.15	0.00	3.37	4.01	3.56	0.153333333333333	3.64666666666667	4.57183506673555	1.13187546812131e-09	4.28057149323708e-08	Gm15056	predicted gene 15056 [Source:MGI Symbol;Acc:MGI:3705859]	-	-	-	-	-	-	-
ENSMUSG00000033777	556	571	335	1279	1107	990	5.78	5.88	3.63	12.68	12.76	10.84	5.09666666666667	12.0933333333333	1.24658604916771	1.16439783343953e-09	4.38613434895307e-08	Tlr13	toll-like receptor 13 [Source:MGI Symbol;Acc:MGI:3045213]	-	-	-	-	GO:0005737//cytoplasm;GO:0005768//endosome;GO:0005887//integral component of plasma membrane;GO:0010008//endosome membrane;GO:0016020//membrane;GO:0016021//integral component of membrane	GO:0003723//RNA binding;GO:0005515//protein binding;GO:0016787//hydrolase activity;GO:0019843//rRNA binding;GO:0038023//signaling receptor activity;GO:0042802//identical protein binding;GO:0050135//NAD(P)+ nucleosidase activity	GO:0002224//toll-like receptor signaling pathway;GO:0002376//immune system process;GO:0002755//MyD88-dependent toll-like receptor signaling pathway;GO:0006954//inflammatory response;GO:0007165//signal transduction;GO:0009615//response to virus;GO:0034178//toll-like receptor 13 signaling pathway;GO:0043408//regulation of MAPK cascade;GO:0045087//innate immune response
ENSMUSG00000079543	4	4	5	36	52	79	0.49	0.48	0.63	4.19	6.97	10.14	0.533333333333333	7.1	3.73470962022584	1.41533925476346e-09	5.25346410882687e-08	Igkv13-85	immunoglobulin kappa chain variable 13-85 [Source:MGI Symbol;Acc:MGI:4439827]	-	-	-	-	GO:0005615//extracellular space	-	GO:0002377//immunoglobulin production;GO:0006955//immune response
ENSMUSG00000015355	414	368	292	672	832	752	14.73	13.04	10.86	22.89	32.89	28.21	12.8766666666667	27.9966666666667	1.12049589068793	1.45969487934728e-09	5.40559062132418e-08	Cd48	CD48 antigen [Source:MGI Symbol;Acc:MGI:88339]	Organismal Systems	Immune system	ko04650//Natural killer cell mediated cytotoxicity	K06479	GO:0005886//plasma membrane;GO:0009897//external side of plasma membrane;GO:0016020//membrane;GO:0031225//anchored component of membrane;GO:0032991//macromolecular complex;GO:0045121//membrane raft;GO:0046658//anchored component of plasma membrane	GO:0003823//antigen binding;GO:0005515//protein binding;GO:0038023//signaling receptor activity	GO:0002819//regulation of adaptive immune response;GO:0007165//signal transduction;GO:0042110//T cell activation;GO:0045576//mast cell activation
ENSMUSG00000063193	179	233	213	610	1155	514	2.62	3.43	3.35	8.67	19.21	8.10	3.13333333333333	11.9933333333333	1.93646252468648	1.48925186054682e-09	5.5023395354535e-08	Cd300lb	CD300 molecule like family member B [Source:MGI Symbol;Acc:MGI:2685099]	-	-	-	-	GO:0005886//plasma membrane;GO:0016020//membrane;GO:0016021//integral component of membrane	GO:0005515//protein binding	GO:0002376//immune system process;GO:0002446//neutrophil mediated immunity;GO:0033005//positive regulation of mast cell activation;GO:0071222//cellular response to lipopolysaccharide
ENSMUSG00000022358	770	671	664	1491	1543	1095	4.66	4.02	4.18	8.61	10.35	6.98	4.28666666666667	8.64666666666667	1.01228783692375	1.49781670919061e-09	5.52126228318884e-08	Fbxo32	F-box protein 32 [Source:MGI Symbol;Acc:MGI:1914981]	Environmental Information Processing	Signal transduction	ko04068//FoxO signaling pathway	K10305	GO:0005634//nucleus;GO:0005654//nucleoplasm;GO:0005737//cytoplasm;GO:0005829//cytosol;GO:0019005//SCF ubiquitin ligase complex;GO:0030018//Z disc	GO:0005515//protein binding	GO:0010614//negative regulation of cardiac muscle hypertrophy;GO:0010666//positive regulation of cardiac muscle cell apoptotic process;GO:0014878//response to electrical stimulus involved in regulation of muscle adaptation;GO:0014889//muscle atrophy;GO:0014894//response to denervation involved in regulation of muscle adaptation;GO:0016567//protein ubiquitination;GO:0071549//cellular response to d…
ENSMUSG00000028111	463	426	468	3115	5846	1916	12.92	11.77	13.60	82.96	180.90	56.34	12.7633333333333	106.733333333333	3.06393374255346	1.55666984124587e-09	5.72504607898568e-08	Ctsk	cathepsin K [Source:MGI Symbol;Acc:MGI:107823]	Human Diseases;Cellular Processes;Cellular Processes;Organismal Systems;Organismal Systems	Immune diseases;Cell growth and death;Transport and catabolism;Development;Immune system	ko05323//Rheumatoid arthritis;ko04210//Apoptosis;ko04142//Lysosome;ko04380//Osteoclast differentiation;ko04620//Toll-like receptor signaling pathway	K01371;K01371;K01371;K01371;K01371	GO:0005576//extracellular region;GO:0005615//extracellular space;GO:0005654//nucleoplasm;GO:0005737//cytoplasm;GO:0005764//lysosome;GO:0005886//plasma membrane;GO:0009897//external side of plasma membrane;GO:0016020//membrane;GO:0016324//apical plasma membrane;GO:0043231//intracellular membrane-bounded organelle	GO:0001968//fibronectin binding;GO:0004197//cysteine-type endopeptidase activity;GO:0005518//collagen binding;GO:0008233//peptidase activity;GO:0008234//cysteine-type peptidase activity;GO:0016787//hydrolase activity;GO:0043394//proteoglycan binding	GO:0001957//intramembranous ossification;GO:0006508//proteolysis;GO:0006590//thyroid hormone generation;GO:0006955//immune response;GO:0030574//collagen catabolic process;GO:0045453//bone resorption;GO:0051603//proteolysis involved in cellular protein catabolic process;GO:0061037//negative regulation of cartilage development
ENSMUSG00000034248	1240	1059	877	612	375	402	13.21	10.82	9.71	5.95	4.37	4.46	11.2466666666667	4.92666666666667	-1.19081370414142	1.782393103974e-09	6.52526790461714e-08	Slc25a37	solute carrier family 25, member 37 [Source:MGI Symbol;Acc:MGI:1914962]	-	-	-	-	GO:0005739//mitochondrion;GO:0005743//mitochondrial inner membrane;GO:0016020//membrane;GO:0016021//integral component of membrane	GO:0005381//iron ion transmembrane transporter activity	GO:0006811//ion transport;GO:0048250//mitochondrial iron ion transport;GO:0055072//iron ion homeostasis
ENSMUSG00000040722	121	134	126	254	251	250	2.27	2.07	1.98	4.20	5.50	4.54	2.10666666666667	4.74666666666667	1.17195268278929	1.95411993556752e-09	7.1358070776635e-08	Scamp5	secretory carrier membrane protein 5 [Source:MGI Symbol;Acc:MGI:1928948]	-	-	-	-	GO:0000139//Golgi membrane;GO:0005768//endosome;GO:0005794//Golgi apparatus;GO:0005886//plasma membrane;GO:0008021//synaptic vesicle;GO:0016020//membrane;GO:0016021//integral component of membrane;GO:0030054//cell junction;GO:0030285//integral component of synaptic vesicle membrane;GO:0030672//synaptic vesicle membrane;GO:0031410//cytoplasmic vesicle;GO:0032588//trans-Golgi network membrane;GO:00…	GO:0044877//macromolecular complex binding	GO:0006887//exocytosis;GO:0015031//protein transport;GO:0034976//response to endoplasmic reticulum stress;GO:0045806//negative regulation of endocytosis;GO:0045956//positive regulation of calcium ion-dependent exocytosis;GO:0050715//positive regulation of cytokine secretion;GO:1900242//regulation of synaptic vesicle endocytosis
ENSMUSG00000025279	141	73	54	303	473	368	1.25	0.64	0.50	2.57	4.66	3.45	0.796666666666667	3.56	2.15982912370681	1.95806368205297e-09	7.1358070776635e-08	Dnase1l3	deoxyribonuclease 1-like 3 [Source:MGI Symbol;Acc:MGI:1314633]	-	-	-	-	GO:0005576//extracellular region;GO:0005634//nucleus;GO:0005783//endoplasmic reticulum	GO:0003677//DNA binding;GO:0004518//nuclease activity;GO:0004519//endonuclease activity;GO:0004520//endodeoxyribonuclease activity;GO:0004530//deoxyribonuclease I activity;GO:0004536//deoxyribonuclease activity;GO:0016787//hydrolase activity	GO:0000737//DNA catabolic process, endonucleolytic;GO:0002283//neutrophil activation involved in immune response;GO:0002673//regulation of acute inflammatory response;GO:0006308//DNA catabolic process;GO:0006309//apoptotic DNA fragmentation;GO:0006915//apoptotic process;GO:0010623//developmental programmed cell death;GO:0012501//programmed cell death;GO:0070948//regulation of neutrophil mediated …
ENSMUSG00000076613	300	231	101	4375	2049	1354	10.73	8.18	3.67	156.63	84.27	53.09	7.52666666666667	97.9966666666667	3.70264969174363	1.99530970812976e-09	7.25505468704323e-08	Ighg2b	immunoglobulin heavy constant gamma 2B [Source:MGI Symbol;Acc:MGI:96445]	Environmental Information Processing;Human Diseases;Human Diseases;Environmental Information Processing;Cellular Processes;Human Diseases;Human Diseases;Environmental Information Processing;Human Diseases;Human Diseases;Human Diseases;Environmental Information Processing;Organismal Systems;Human Diseases;Human Diseases;Organismal Systems;Organismal Systems;Human Diseases;Organismal Systems;Human …	Signal transduction;Infectious diseases;Infectious diseases;Signal transduction;Transport and catabolism;Cancers;Infectious diseases;Signal transduction;Immune diseases;Infectious diseases;Infectious diseases;Signal transduction;Immune system;Immune diseases;Cardiovascular diseases;Immune system;Immune system;Cardiovascular diseases;Immune system;Immune diseases;Infectious diseases;Immune system;…	ko04151//PI3K-Akt signaling pathway;ko05169//Epstein-Barr virus infection;ko05130//Pathogenic Escherichia coli infection;ko04020//Calcium signaling pathway;ko04145//Phagosome;ko05202//Transcriptional misregulation in cancers;ko05152//Tuberculosis;ko04072//Phospholipase D signaling pathway;ko05322//Systemic lupus erythematosus;ko05150//Staphylococcus aureus infection;ko05146//Amoebiasis;ko04064//N…	K06856;K06856;K06856;K06856;K06856;K06856;K06856;K06856;K06856;K06856;K06856;K06856;K06856;K06856;K06856;K06856;K06856;K06856;K06856;K06856;K06856;K06856;K06856;K06856;K06856;K06856;K06856	GO:0016020//membrane;GO:0016021//integral component of membrane	-	-
ENSMUSG00000026678	449	229	352	1044	1493	839	4.62	2.34	3.78	10.26	17.14	9.11	3.58	12.17	1.76529767544947	2.01041463559034e-09	7.29343861576722e-08	Rgs5	regulator of G-protein signaling 5 [Source:MGI Symbol;Acc:MGI:1098434]	-	-	-	-	GO:0005737//cytoplasm;GO:0016020//membrane	GO:0005096//GTPase activator activity	GO:0007165//signal transduction;GO:0007186//G-protein coupled receptor signaling pathway;GO:0009968//negative regulation of signal transduction;GO:0043547//positive regulation of GTPase activity;GO:1904706//negative regulation of vascular smooth muscle cell proliferation
ENSMUSG00000071714	805	740	844	1630	1932	1313	7.66	7.23	8.21	15.34	19.80	12.32	7.7	15.82	1.03881924889053	2.02274699103944e-09	7.32161354431546e-08	Csf2rb2	colony stimulating factor 2 receptor, beta 2, low-affinity (granulocyte-macrophage) [Source:MGI Symbol;Acc:MGI:1339760]	Human Diseases;Environmental Information Processing;Environmental Information Processing;Cellular Processes	Cancers;Signaling molecules and interaction;Signal transduction;Cell growth and death	ko05200//Pathways in cancer;ko04060//Cytokine-cytokine receptor interaction;ko04630//Jak-STAT signaling pathway;ko04210//Apoptosis	K04738;K04738;K04738;K04738	GO:0005886//plasma membrane;GO:0016020//membrane;GO:0016021//integral component of membrane	GO:0004896//cytokine receptor activity;GO:0005515//protein binding	GO:0019221//cytokine-mediated signaling pathway
ENSMUSG00000060311	2	4	3	27	72	82	0.11	0.22	0.17	1.43	4.44	4.81	0.166666666666667	3.56	4.41683974191283	2.14545462096857e-09	7.73086850499572e-08	Mucl1	mucin-like 1 [Source:MGI Symbol;Acc:MGI:98393]	-	-	-	-	GO:0005575//cellular_component	GO:0003674//molecular_function	GO:0008150//biological_process
ENSMUSG00000076563	14	7	1	801	769	149	1.64	0.81	0.12	89.59	99.95	18.40	0.856666666666667	69.3133333333333	6.338255136656	2.21727281587657e-09	7.94735116527845e-08	Igkv5-48	immunoglobulin kappa variable 5-48 [Source:MGI Symbol;Acc:MGI:3642817]	-	-	-	-	GO:0005615//extracellular space;GO:0019814//immunoglobulin complex	-	GO:0002250//adaptive immune response;GO:0002376//immune system process;GO:0002377//immunoglobulin production;GO:0006955//immune response
ENSMUSG00000031004	702	392	354	1424	1576	1146	3.65	2.07	1.59	7.83	10.49	7.49	2.43666666666667	8.60333333333333	1.81998683014153	2.2966508358676e-09	8.20195905415076e-08	Mki67	antigen identified by monoclonal antibody Ki 67 [Source:MGI Symbol;Acc:MGI:106035]	-	-	-	-	GO:0000775//chromosome, centromeric region;GO:0000793//condensed chromosome;GO:0005634//nucleus;GO:0005654//nucleoplasm;GO:0005694//chromosome;GO:0005730//nucleolus;GO:0005737//cytoplasm;GO:0016604//nuclear body	GO:0000166//nucleotide binding;GO:0003677//DNA binding;GO:0005515//protein binding;GO:0005524//ATP binding;GO:0008022//protein C-terminus binding	GO:0007049//cell cycle;GO:0007088//regulation of mitotic nuclear division;GO:0008283//cell proliferation;GO:0051321//meiotic cell cycle;GO:0051983//regulation of chromosome segregation;GO:0072574//hepatocyte proliferation;GO:1902275//regulation of chromatin organization;GO:1990705//cholangiocyte proliferation
ENSMUSG00000001542	364	331	383	677	871	674	6.52	6.03	6.44	12.47	17.06	9.71	6.33	13.08	1.04708513606974	2.57333763450378e-09	9.14932793110157e-08	Ell2	elongation factor RNA polymerase II 2 [Source:MGI Symbol;Acc:MGI:2183438]	-	-	-	-	GO:0005634//nucleus;GO:0005654//nucleoplasm;GO:0008023//transcription elongation factor complex	-	GO:0006368//transcription elongation from RNA polymerase II promoter;GO:0032968//positive regulation of transcription elongation from RNA polymerase II promoter;GO:0042795//snRNA transcription from RNA polymerase II promoter
ENSMUSG00000032226	3	5	2	47	75	35	0.03	0.05	0.02	0.44	0.82	0.36	0.0333333333333333	0.54	4.01792190799726	2.68638767116046e-09	9.50910073003487e-08	Gcnt3	glucosaminyl (N-acetyl) transferase 3, mucin type [Source:MGI Symbol;Acc:MGI:1919327]	Metabolism;Metabolism	Global and overview maps;Glycan biosynthesis and metabolism	ko01100//Metabolic pathways;ko00512//Mucin type O-glycan biosynthesis	K09662;K09662	GO:0000139//Golgi membrane;GO:0005794//Golgi apparatus;GO:0016020//membrane;GO:0016021//integral component of membrane	GO:0003829//beta-1,3-galactosyl-O-glycosyl-glycoprotein beta-1,6-N-acetylglucosaminyltransferase activity;GO:0008109//N-acetyllactosaminide beta-1,6-N-acetylglucosaminyltransferase activity;GO:0008375//acetylglucosaminyltransferase activity;GO:0016740//transferase activity;GO:0016757//transferase activity, transferring glycosyl groups;GO:0047225//acetylgalactosaminyl-O-glycosyl-glycoprotein beta-…	GO:0002426//immunoglobulin production in mucosal tissue;GO:0006486//protein glycosylation;GO:0006493//protein O-linked glycosylation;GO:0048729//tissue morphogenesis;GO:0050892//intestinal absorption;GO:0060993//kidney morphogenesis
ENSMUSG00000027951	1417	1231	1280	2171	3441	3622	13.29	11.29	12.58	19.41	36.03	35.31	12.3866666666667	30.25	1.28814714138782	2.69324086867581e-09	9.51236064520191e-08	Adar	adenosine deaminase, RNA-specific [Source:MGI Symbol;Acc:MGI:1889575]	Human Diseases;Human Diseases;Organismal Systems	Infectious diseases;Infectious diseases;Immune system	ko05164//Influenza A;ko05162//Measles;ko04623//Cytosolic DNA-sensing pathway	K12968;K12968;K12968	GO:0005634//nucleus;GO:0005654//nucleoplasm;GO:0005730//nucleolus;GO:0005737//cytoplasm;GO:0016607//nuclear speck;GO:0044530//supraspliceosomal complex	GO:0003677//DNA binding;GO:0003692//left-handed Z-DNA binding;GO:0003723//RNA binding;GO:0003725//double-stranded RNA binding;GO:0003726//double-stranded RNA adenosine deaminase activity;GO:0004000//adenosine deaminase activity;GO:0005515//protein binding;GO:0008251//tRNA-specific adenosine deaminase activity;GO:0016787//hydrolase activity;GO:0046872//metal ion binding	GO:0001649//osteoblast differentiation;GO:0002244//hematopoietic progenitor cell differentiation;GO:0002376//immune system process;GO:0002566//somatic diversification of immune receptors via somatic mutation;GO:0006382//adenosine to inosine editing;GO:0006396//RNA processing;GO:0006397//mRNA processing;GO:0006606//protein import into nucleus;GO:0006611//protein export from nucleus;GO:0009615//res…
ENSMUSG00000022650	0	0	0	31	42	36	0.00	0.00	0.00	1.79	2.82	2.30	0.001	2.30333333333333	11.1695074945545	3.18120439282894e-09	1.106520877202e-07	Retnlb	resistin like beta [Source:MGI Symbol;Acc:MGI:1888505]	-	-	-	-	GO:0005576//extracellular region	GO:0005179//hormone activity	GO:0007165//signal transduction
ENSMUSG00000026630	11	14	13	70	70	54	0.52	0.85	0.86	3.65	4.31	3.04	0.743333333333333	3.66666666666667	2.30238790849172	3.28213162670291e-09	1.13915542498228e-07	Batf3	basic leucine zipper transcription factor, ATF-like 3 [Source:MGI Symbol;Acc:MGI:1925491]	Human Diseases	Cancer: overview	ko05235//PD-L1 expression and PD-1 checkpoint pathway in cancer	K09034	GO:0005634//nucleus	GO:0000978//RNA polymerase II core promoter proximal region sequence-specific DNA binding;GO:0000981//RNA polymerase II transcription factor activity, sequence-specific DNA binding;GO:0001227//transcriptional repressor activity, RNA polymerase II transcription regulatory region sequence-specific binding;GO:0003677//DNA binding;GO:0003700//transcription factor activity, sequence-specific DNA bindi…	GO:0000122//negative regulation of transcription from RNA polymerase II promoter;GO:0006355//regulation of transcription, DNA-templated;GO:0006357//regulation of transcription from RNA polymerase II promoter;GO:0009615//response to virus;GO:0030154//cell differentiation;GO:0043011//myeloid dendritic cell differentiation;GO:0097028//dendritic cell differentiation
ENSMUSG00000050335	2264	2839	2253	6491	8939	4288	86.56	108.01	89.52	236.51	377.16	172.11	94.6966666666667	261.926666666667	1.46777739879527	3.63556510746141e-09	1.25638548487379e-07	Lgals3	lectin, galactose binding, soluble 3 [Source:MGI Symbol;Acc:MGI:96778]	-	-	-	-	GO:0001772//immunological synapse;GO:0005634//nucleus;GO:0005737//cytoplasm;GO:0005743//mitochondrial inner membrane	GO:0019863//IgE binding;GO:0019903//protein phosphatase binding;GO:0030246//carbohydrate binding;GO:0042056//chemoattractant activity;GO:0043236//laminin binding	GO:0002548//monocyte chemotaxis;GO:0030593//neutrophil chemotaxis;GO:0030855//epithelial cell differentiation;GO:0031334//positive regulation of protein complex assembly;GO:0042129//regulation of T cell proliferation;GO:0045806//negative regulation of endocytosis;GO:0048245//eosinophil chemotaxis;GO:0048246//macrophage chemotaxis;GO:0050918//positive chemotaxis;GO:0070232//regulation of T cell ap…
ENSMUSG00000016496	979	1088	780	1636	1771	2191	11.40	12.55	9.47	18.19	22.88	26.90	11.14	22.6566666666667	1.02418638941561	3.78889834686812e-09	1.30655881703291e-07	Cd274	CD274 antigen [Source:MGI Symbol;Acc:MGI:1926446]	Environmental Information Processing;Human Diseases	Signaling molecules and interaction;Cancer: overview	ko04514//Cell adhesion molecules (CAMs);ko05235//PD-L1 expression and PD-1 checkpoint pathway in cancer	K06745;K06745	GO:0005768//endosome;GO:0005886//plasma membrane;GO:0009897//external side of plasma membrane;GO:0009986//cell surface;GO:0016020//membrane;GO:0016021//integral component of membrane;GO:0031901//early endosome membrane;GO:0055038//recycling endosome membrane;GO:0070062//extracellular exosome	GO:0005515//protein binding	GO:0002250//adaptive immune response;GO:0002376//immune system process;GO:0002845//positive regulation of tolerance induction to tumor cell;GO:0006955//immune response;GO:0007165//signal transduction;GO:0007166//cell surface receptor signaling pathway;GO:0030335//positive regulation of cell migration;GO:0031295//T cell costimulation;GO:0032689//negative regulation of interferon-gamma production;G…
ENSMUSG00000031443	296	373	374	895	1032	615	6.72	8.38	8.84	19.39	25.98	14.71	7.98	20.0266666666667	1.32746166057077	4.07240450529717e-09	1.38938311154128e-07	F7	coagulation factor VII [Source:MGI Symbol;Acc:MGI:109325]	Organismal Systems	Immune system	ko04610//Complement and coagulation cascades	K01320	GO:0005576//extracellular region;GO:0005615//extracellular space;GO:0031982//vesicle	GO:0004175//endopeptidase activity;GO:0004252//serine-type endopeptidase activity;GO:0005102//receptor binding;GO:0005509//calcium ion binding;GO:0008233//peptidase activity;GO:0008236//serine-type peptidase activity;GO:0016787//hydrolase activity	GO:0001666//response to hypoxia;GO:0002690//positive regulation of leukocyte chemotaxis;GO:0006508//proteolysis;GO:0007596//blood coagulation;GO:0007599//hemostasis;GO:0007623//circadian rhythm;GO:0009725//response to hormone;GO:0010037//response to carbon dioxide;GO:0010641//positive regulation of platelet-derived growth factor receptor signaling pathway;GO:0014070//response to organic cyclic co…
ENSMUSG00000011008	53	71	61	146	213	195	0.89	1.18	1.06	2.69	3.97	3.46	1.04333333333333	3.37333333333333	1.6929747277617	4.46555377550182e-09	1.50747694295098e-07	Mcoln2	mucolipin 2 [Source:MGI Symbol;Acc:MGI:1915529]	-	-	-	-	GO:0005623//cell;GO:0005764//lysosome;GO:0005768//endosome;GO:0016020//membrane;GO:0016021//integral component of membrane;GO:0055037//recycling endosome;GO:0055038//recycling endosome membrane	GO:0005261//cation channel activity;GO:0005262//calcium channel activity;GO:0042802//identical protein binding;GO:0072345//NAADP-sensitive calcium-release channel activity	GO:0002250//adaptive immune response;GO:0002376//immune system process;GO:0006811//ion transport;GO:0006816//calcium ion transport;GO:0015031//protein transport;GO:0032722//positive regulation of chemokine production;GO:0034220//ion transmembrane transport;GO:0035926//chemokine (C-C motif) ligand 2 secretion;GO:0045087//innate immune response;GO:0051209//release of sequestered calcium ion into cy…
ENSMUSG00000035352	17	7	23	71	134	130	1.34	0.54	1.88	5.45	11.73	10.81	1.25333333333333	9.33	2.89610691989528	4.76003747967204e-09	1.60351262576767e-07	Ccl12	chemokine (C-C motif) ligand 12 [Source:MGI Symbol;Acc:MGI:108224]	Human Diseases;Environmental Information Processing;Human Diseases;Organismal Systems;Human Diseases;Organismal Systems;Human Diseases;Human Diseases;Human Diseases;Environmental Information Processing;Human Diseases;Human Diseases;Organismal Systems;Environmental Information Processing;Human Diseases	Infectious diseases;Signaling molecules and interaction;Infectious diseases;Immune system;Immune diseases;Immune system;Infectious diseases;Cardiovascular diseases;Infectious disease: bacterial;Signal transduction;Infectious diseases;Endocrine and metabolic diseases;Immune system;Signaling molecules and interaction;Infectious diseases	ko05168//Herpes simplex infection;ko04060//Cytokine-cytokine receptor interaction;ko05163//Human cytomegalovirus infection;ko04621//NOD-like receptor signaling pathway;ko05323//Rheumatoid arthritis;ko04062//Chemokine signaling pathway;ko05164//Influenza A;ko05418//Fluid shear stress and atherosclerosis;ko05135//Yersinia infection;ko04668//TNF signaling pathway;ko05142//Chagas disease (American tr…	K14624;K14624;K14624;K14624;K14624;K14624;K14624;K14624;K14624;K14624;K14624;K14624;K14624;K14624;K14624	GO:0005576//extracellular region;GO:0005615//extracellular space	GO:0005125//cytokine activity;GO:0008009//chemokine activity;GO:0031727//CCR2 chemokine receptor binding;GO:0048020//CCR chemokine receptor binding	GO:0000165//MAPK cascade;GO:0001525//angiogenesis;GO:0002548//monocyte chemotaxis;GO:0002687//positive regulation of leukocyte migration;GO:0006935//chemotaxis;GO:0006954//inflammatory response;GO:0006955//immune response;GO:0007010//cytoskeleton organization;GO:0007165//signal transduction;GO:0007186//G-protein coupled receptor signaling pathway;GO:0008360//regulation of cell shape;GO:0019221//c…
ENSMUSG00000049037	114	105	59	292	219	283	3.09	2.82	1.66	7.55	6.58	8.08	2.52333333333333	7.40333333333333	1.55284418756125	4.99509309508053e-09	1.67565518367398e-07	Clec4a1	C-type lectin domain family 4, member a1 [Source:MGI Symbol;Acc:MGI:3036291]	-	-	-	-	GO:0005575//cellular_component;GO:0016020//membrane;GO:0016021//integral component of membrane	GO:0003674//molecular_function;GO:0030246//carbohydrate binding	GO:0008150//biological_process
ENSMUSG00000061356	5	3	0	61	63	32	0.08	0.05	0.00	0.93	1.10	0.54	0.0433333333333333	0.856666666666667	4.30518483105279	5.95298015603752e-09	1.98041570128759e-07	Nuggc	nuclear GTPase, germinal center associated [Source:MGI Symbol;Acc:MGI:2685446]	-	-	-	-	GO:0005634//nucleus;GO:0016607//nuclear speck	GO:0000166//nucleotide binding;GO:0003924//GTPase activity;GO:0005525//GTP binding;GO:0016787//hydrolase activity	GO:0006974//cellular response to DNA damage stimulus;GO:0016446//somatic hypermutation of immunoglobulin genes;GO:0033262//regulation of nuclear cell cycle DNA replication;GO:0043066//negative regulation of apoptotic process;GO:0071222//cellular response to lipopolysaccharide
ENSMUSG00000067455	100	82	79	201	243	195	5.44	4.44	4.48	10.46	14.70	11.17	4.78666666666667	12.11	1.33910561659243	6.06097058749181e-09	2.01216694348719e-07	H4c11	H4 clustered histone 11 [Source:MGI Symbol;Acc:MGI:2448436]	Human Diseases;Human Diseases;Human Diseases	Immune diseases;Cancers;Substance dependence	ko05322//Systemic lupus erythematosus;ko05203//Viral carcinogenesis;ko05034//Alcoholism	K11254;K11254;K11254	GO:0000228//nuclear chromosome;GO:0000786//nucleosome;GO:0000788//nuclear nucleosome;GO:0005634//nucleus;GO:0005654//nucleoplasm;GO:0005694//chromosome;GO:0032991//macromolecular complex	GO:0003677//DNA binding;GO:0005515//protein binding;GO:0019904//protein domain specific binding;GO:0046982//protein heterodimerization activity	GO:0006334//nucleosome assembly;GO:0006335//DNA replication-dependent nucleosome assembly;GO:0006336//DNA replication-independent nucleosome assembly;GO:0006352//DNA-templated transcription, initiation;GO:0045653//negative regulation of megakaryocyte differentiation
ENSMUSG00000040483	223	177	175	370	775	717	11.60	8.60	9.33	14.64	37.62	35.57	9.84333333333333	29.2766666666667	1.57253244728293	6.98949149403277e-09	2.31085558983125e-07	Xaf1	XIAP associated factor 1 [Source:MGI Symbol;Acc:MGI:3772572]	-	-	-	-	GO:0005634//nucleus;GO:0005654//nucleoplasm;GO:0005737//cytoplasm;GO:0005739//mitochondrion	GO:0046872//metal ion binding	GO:0006915//apoptotic process;GO:0031333//negative regulation of protein complex assembly;GO:0035456//response to interferon-beta
ENSMUSG00000003484	175	276	166	548	410	499	4.49	7.03	4.42	13.37	11.58	13.39	5.31333333333333	12.78	1.26619870767768	7.05224799373591e-09	2.32680651398262e-07	Cyp4f18	cytochrome P450, family 4, subfamily f, polypeptide 18 [Source:MGI Symbol;Acc:MGI:1919304]	Metabolism;Metabolism	Global and overview maps;Lipid metabolism	ko01100//Metabolic pathways;ko00590//Arachidonic acid metabolism	K17726;K17726	GO:0005737//cytoplasm;GO:0005783//endoplasmic reticulum;GO:0005789//endoplasmic reticulum membrane;GO:0016020//membrane;GO:0016021//integral component of membrane;GO:0016324//apical plasma membrane;GO:0031090//organelle membrane;GO:0043231//intracellular membrane-bounded organelle	GO:0004497//monooxygenase activity;GO:0005506//iron ion binding;GO:0008392//arachidonic acid epoxygenase activity;GO:0016491//oxidoreductase activity;GO:0016705//oxidoreductase activity, acting on paired donors, with incorporation or reduction of molecular oxygen;GO:0016709//oxidoreductase activity, acting on paired donors, with incorporation or reduction of molecular oxygen, NAD(P)H as one donor…	GO:0000038//very long-chain fatty acid metabolic process;GO:0001676//long-chain fatty acid metabolic process;GO:0006629//lipid metabolic process;GO:0008217//regulation of blood pressure;GO:0017144//drug metabolic process;GO:0019369//arachidonic acid metabolic process;GO:0019373//epoxygenase P450 pathway;GO:0032304//negative regulation of icosanoid secretion;GO:0032305//positive regulation of icos…
ENSMUSG00000062007	28	23	32	85	130	109	0.65	0.55	0.77	1.88	3.33	2.66	0.656666666666667	2.62333333333333	1.99816800605111	7.86629452811822e-09	2.57946897256392e-07	Hsh2d	hematopoietic SH2 domain containing [Source:MGI Symbol;Acc:MGI:2676364]	-	-	-	-	GO:0005737//cytoplasm;GO:0005739//mitochondrion;GO:0005829//cytosol	GO:0005070//SH3/SH2 adaptor activity;GO:0035591//signaling adaptor activity	GO:0002903//negative regulation of B cell apoptotic process;GO:0007165//signal transduction;GO:0009967//positive regulation of signal transduction;GO:0042110//T cell activation;GO:0051902//negative regulation of mitochondrial depolarization
ENSMUSG00000028003	3941	3929	6031	2061	1324	2213	31.07	30.68	49.55	15.51	11.58	18.39	37.1	15.16	-1.29114943333707	8.04175662616198e-09	2.63162382654097e-07	Lrat	lecithin-retinol acyltransferase (phosphatidylcholine-retinol-O-acyltransferase) [Source:MGI Symbol;Acc:MGI:1891259]	Metabolism;Organismal Systems	Metabolism of cofactors and vitamins;Digestive system	ko00830//Retinol metabolism;ko04977//Vitamin digestion and absorption	K00678;K00678	GO:0005737//cytoplasm;GO:0005768//endosome;GO:0005771//multivesicular body;GO:0005783//endoplasmic reticulum;GO:0005789//endoplasmic reticulum membrane;GO:0005791//rough endoplasmic reticulum;GO:0016020//membrane;GO:0016021//integral component of membrane;GO:0043231//intracellular membrane-bounded organelle;GO:0048471//perinuclear region of cytoplasm	GO:0001972//retinoic acid binding;GO:0008374//O-acyltransferase activity;GO:0016740//transferase activity;GO:0016746//transferase activity, transferring acyl groups;GO:0019841//retinol binding;GO:0047173//phosphatidylcholine-retinol O-acyltransferase activity	GO:0006653//1,2-diacyl-sn-glycero-3-phosphocholine metabolic process;GO:0006776//vitamin A metabolic process;GO:0007601//visual perception;GO:0009617//response to bacterium;GO:0032370//positive regulation of lipid transport;GO:0032526//response to retinoic acid;GO:0033189//response to vitamin A;GO:0042572//retinol metabolic process;GO:0050896//response to stimulus;GO:1990830//cellular response to…
ENSMUSG00000107478	22	51	39	0	0	0	0.21	0.49	0.39	0.00	0.00	0.00	0.363333333333333	0.001	-8.50514991894313	8.74933460631696e-09	2.85734379658437e-07	Gm45234	predicted gene 45234 [Source:MGI Symbol;Acc:MGI:5753810]	-	-	-	-	GO:0005634//nucleus;GO:0005654//nucleoplasm;GO:0005737//cytoplasm;GO:0016363//nuclear matrix;GO:0030054//cell junction;GO:0031252//cell leading edge;GO:0048471//perinuclear region of cytoplasm	GO:0001085//RNA polymerase II transcription factor binding;GO:0003677//DNA binding;GO:0003713//transcription coactivator activity;GO:0003714//transcription corepressor activity;GO:0005515//protein binding;GO:0008432//JUN kinase binding;GO:0019904//protein domain specific binding	GO:0000122//negative regulation of transcription from RNA polymerase II promoter;GO:0007283//spermatogenesis;GO:0008340//determination of adult lifespan;GO:0008584//male gonad development;GO:0009404//toxin metabolic process;GO:0009791//post-embryonic development;GO:0016477//cell migration;GO:0030011//maintenance of cell polarity;GO:0032094//response to food;GO:0035264//multicellular organism grow…
ENSMUSG00000027408	494	471	384	1133	733	791	8.81	8.32	7.13	19.28	14.50	14.87	8.08666666666667	16.2166666666667	1.00386025454797	9.57650141509239e-09	3.11479107892508e-07	Cpxm1	carboxypeptidase X 1 (M14 family) [Source:MGI Symbol;Acc:MGI:1934569]	-	-	-	-	GO:0005576//extracellular region;GO:0005615//extracellular space	GO:0004181//metallocarboxypeptidase activity;GO:0008270//zinc ion binding;GO:0016787//hydrolase activity;GO:0046872//metal ion binding	GO:0006508//proteolysis;GO:0006518//peptide metabolic process;GO:0016485//protein processing
ENSMUSG00000074417	198	237	195	528	342	411	3.93	4.66	4.02	10.00	7.53	8.60	4.20333333333333	8.71	1.0511388489918	9.62184382369967e-09	3.12320375937296e-07	Gm14548	predicted gene 14548 [Source:MGI Symbol;Acc:MGI:3709645]	Organismal Systems;Organismal Systems	Immune system;Development	ko04662//B cell receptor signaling pathway;ko04380//Osteoclast differentiation	K06512;K06512	GO:0005575//cellular_component	GO:0003674//molecular_function	GO:0008150//biological_process
ENSMUSG00000043931	158	127	110	324	266	257	5.25	4.18	3.81	10.28	9.81	9.01	4.41333333333333	9.7	1.13611603098843	1.05762322784187e-08	3.40541936916554e-07	Gimap7	GTPase, IMAP family member 7 [Source:MGI Symbol;Acc:MGI:1349657]	-	-	-	-	GO:0005811//lipid particle;GO:0005829//cytosol;GO:0043231//intracellular membrane-bounded organelle	GO:0003924//GTPase activity;GO:0005525//GTP binding;GO:0042802//identical protein binding;GO:0042803//protein homodimerization activity	GO:0046039//GTP metabolic process
ENSMUSG00000028037	278	286	238	992	3955	3738	4.03	4.10	4.10	13.73	65.55	57.42	4.07666666666667	45.5666666666667	3.48251693396604	1.20988794049775e-08	3.86019506525801e-07	Ifi44	interferon-induced protein 44 [Source:MGI Symbol;Acc:MGI:2443016]	-	-	-	-	GO:0005737//cytoplasm	GO:0003674//molecular_function	GO:0006955//immune response;GO:0009617//response to bacterium
ENSMUSG00000017830	150	221	185	353	949	1013	2.74	3.97	3.77	6.11	20.12	21.89	3.49333333333333	16.04	2.19899792563863	1.21089997993438e-08	3.86019506525801e-07	Dhx58	DEXH (Asp-Glu-X-His) box polypeptide 58 [Source:MGI Symbol;Acc:MGI:1931560]	Organismal Systems	Immune system	ko04622//RIG-I-like receptor signaling pathway	K12649	GO:0005737//cytoplasm	GO:0000166//nucleotide binding;GO:0003677//DNA binding;GO:0003723//RNA binding;GO:0003724//RNA helicase activity;GO:0003725//double-stranded RNA binding;GO:0003727//single-stranded RNA binding;GO:0004386//helicase activity;GO:0005524//ATP binding;GO:0008270//zinc ion binding;GO:0016787//hydrolase activity;GO:0046872//metal ion binding	GO:0002376//immune system process;GO:0009615//response to virus;GO:0009617//response to bacterium;GO:0032480//negative regulation of type I interferon production;GO:0032481//positive regulation of type I interferon production;GO:0039534//negative regulation of MDA-5 signaling pathway;GO:0039536//negative regulation of RIG-I signaling pathway;GO:0045087//innate immune response;GO:0045088//regulati…
ENSMUSG00000024673	357	596	342	1021	1285	951	4.90	8.10	4.89	13.37	19.55	13.75	5.96333333333333	15.5566666666667	1.38334207991224	1.22636768486289e-08	3.89294605091652e-07	Ms4a1	membrane-spanning 4-domains, subfamily A, member 1 [Source:MGI Symbol;Acc:MGI:88321]	Organismal Systems	Immune system	ko04640//Hematopoietic cell lineage	K06466	GO:0005623//cell;GO:0005654//nucleoplasm;GO:0005886//plasma membrane;GO:0005887//integral component of plasma membrane;GO:0009897//external side of plasma membrane;GO:0009986//cell surface;GO:0016020//membrane;GO:0016021//integral component of membrane;GO:0044853//plasma membrane raft	GO:0005154//epidermal growth factor receptor binding;GO:0005515//protein binding;GO:0019865//immunoglobulin binding	GO:0002115//store-operated calcium entry;GO:0009617//response to bacterium;GO:0030183//B cell differentiation;GO:0042113//B cell activation;GO:0050853//B cell receptor signaling pathway;GO:0051262//protein tetramerization;GO:1902656//calcium ion import into cytosol
ENSMUSG00000028238	1066	784	751	2557	3151	1497	17.71	12.90	13.00	40.55	58.07	26.22	14.5366666666667	41.6133333333333	1.5173493668376	1.22845693904818e-08	3.89294605091652e-07	Atp6v0d2	ATPase, H+ transporting, lysosomal V0 subunit D2 [Source:MGI Symbol;Acc:MGI:1924415]	Metabolism;Human Diseases;Cellular Processes;Human Diseases;Human Diseases;Human Diseases;Cellular Processes;Metabolism;Organismal Systems;Human Diseases;Human Diseases;Organismal Systems	Global and overview maps;Infectious diseases;Transport and catabolism;Infectious diseases;Cancers;Immune diseases;Transport and catabolism;Energy metabolism;Nervous system;Infectious diseases;Infectious diseases;Excretory system	ko01100//Metabolic pathways;ko05165//Human papillomavirus infection;ko04145//Phagosome;ko05152//Tuberculosis;ko05203//Viral carcinogenesis;ko05323//Rheumatoid arthritis;ko04142//Lysosome;ko00190//Oxidative phosphorylation;ko04721//Synaptic vesicle cycle;ko05120//Epithelial cell signaling in Helicobacter pylori infection;ko05110//Vibrio cholerae infection;ko04966//Collecting duct acid secretion	K02146;K02146;K02146;K02146;K02146;K02146;K02146;K02146;K02146;K02146;K02146;K02146	GO:0005623//cell;GO:0005765//lysosomal membrane;GO:0005768//endosome;GO:0005769//early endosome;GO:0016020//membrane;GO:0016324//apical plasma membrane;GO:0016471//vacuolar proton-transporting V-type ATPase complex;GO:0033179//proton-transporting V-type ATPase, V0 domain;GO:0033181//plasma membrane proton-transporting V-type ATPase complex	GO:0008553//hydrogen-exporting ATPase activity, phosphorylative mechanism;GO:0015078//hydrogen ion transmembrane transporter activity;GO:0046961//proton-transporting ATPase activity, rotational mechanism	GO:0006811//ion transport;GO:0007034//vacuolar transport;GO:0007035//vacuolar acidification;GO:1902600//hydrogen ion transmembrane transport
ENSMUSG00000022803	313	320	327	178	112	161	8.31	8.28	8.46	4.19	3.69	4.41	8.35	4.09666666666667	-1.02732568770991	1.32256642988946e-08	4.17481831892153e-07	Popdc2	popeye domain containing 2 [Source:MGI Symbol;Acc:MGI:1930150]	-	-	-	-	GO:0005886//plasma membrane;GO:0016020//membrane;GO:0016021//integral component of membrane;GO:0042383//sarcolemma	GO:0000166//nucleotide binding;GO:0030552//cAMP binding	GO:0002027//regulation of heart rate;GO:0007507//heart development;GO:0007519//skeletal muscle tissue development;GO:0042391//regulation of membrane potential;GO:0051146//striated muscle cell differentiation;GO:0060931//sinoatrial node cell development
ENSMUSG00000076580	4	7	12	140	1495	241	0.47	0.84	1.47	15.66	194.31	29.77	0.926666666666667	79.9133333333333	6.43024194583872	1.42376017093946e-08	4.44163314027514e-07	Igkv8-27	immunoglobulin kappa chain variable 8-27 [Source:MGI Symbol;Acc:MGI:4439868]	-	-	-	-	GO:0005615//extracellular space	-	GO:0002377//immunoglobulin production;GO:0006955//immune response
ENSMUSG00000046491	496	537	547	211	208	305	17.69	18.53	19.86	7.02	8.11	11.20	18.6933333333333	8.77666666666667	-1.09077882796456	1.44778956424197e-08	4.50782634225631e-07	C1qtnf2	C1q and tumor necrosis factor related protein 2 [Source:MGI Symbol;Acc:MGI:1916433]	-	-	-	-	GO:0005576//extracellular region;GO:0005581//collagen trimer;GO:0005615//extracellular space;GO:0032991//macromolecular complex	GO:0005102//receptor binding;GO:0005515//protein binding;GO:0042802//identical protein binding	GO:0000187//activation of MAPK activity;GO:0019216//regulation of lipid metabolic process;GO:0045725//positive regulation of glycogen biosynthetic process;GO:0046321//positive regulation of fatty acid oxidation;GO:0046326//positive regulation of glucose import
ENSMUSG00000009633	658	810	713	365	185	338	31.87	38.85	35.99	16.87	9.94	17.25	35.57	14.6866666666667	-1.27615398008212	1.48504332725913e-08	4.61485847918608e-07	G0s2	G0/G1 switch gene 2 [Source:MGI Symbol;Acc:MGI:1316737]	-	-	-	-	GO:0005739//mitochondrion;GO:0016020//membrane;GO:0016021//integral component of membrane	-	GO:0006915//apoptotic process;GO:0097191//extrinsic apoptotic signaling pathway;GO:2001238//positive regulation of extrinsic apoptotic signaling pathway
ENSMUSG00000094433	28	23	8	3111	658	225	3.12	2.53	0.93	330.49	81.19	26.40	2.19333333333333	146.026666666667	6.05696295752266	1.51763327512623e-08	4.70701152159558e-07	Igkv5-43	immunoglobulin kappa chain variable 5-43 [Source:MGI Symbol;Acc:MGI:4943320]	-	-	-	-	GO:0005615//extracellular space	-	GO:0002377//immunoglobulin production;GO:0006955//immune response
ENSMUSG00000047735	1579	1590	1405	2518	5173	4228	12.50	12.46	11.59	19.02	45.41	35.61	12.1833333333333	33.3466666666667	1.45263365134118	1.55204697661142e-08	4.78597562883926e-07	Samd9l	sterile alpha motif domain containing 9-like [Source:MGI Symbol;Acc:MGI:1343184]	-	-	-	-	-	GO:0005515//protein binding	-
ENSMUSG00000067916	106	141	100	258	313	248	1.59	2.10	1.56	3.70	5.21	3.92	1.75	4.27666666666667	1.2891318425362	1.60127656502892e-08	4.91886393108021e-07	Zfp991	zinc finger protein 991 [Source:MGI Symbol;Acc:MGI:3701604]	Human Diseases	Infectious diseases	ko05168//Herpes simplex infection	K09228	GO:0005575//cellular_component	GO:0003674//molecular_function;GO:0003676//nucleic acid binding;GO:0046872//metal ion binding	GO:0006355//regulation of transcription, DNA-templated;GO:0008150//biological_process
ENSMUSG00000048521	111	108	65	232	322	255	2.47	2.38	1.51	4.92	7.94	5.98	2.12	6.28	1.56670029432843	1.60850915982309e-08	4.9316337242377e-07	Cxcr6	chemokine (C-X-C motif) receptor 6 [Source:MGI Symbol;Acc:MGI:1934582]	Environmental Information Processing;Organismal Systems	Signaling molecules and interaction;Immune system	ko04060//Cytokine-cytokine receptor interaction;ko04062//Chemokine signaling pathway	K04191;K04191	GO:0005623//cell;GO:0005886//plasma membrane;GO:0009897//external side of plasma membrane;GO:0016020//membrane;GO:0016021//integral component of membrane	GO:0004930//G-protein coupled receptor activity;GO:0004950//chemokine receptor activity;GO:0015026//coreceptor activity;GO:0016493//C-C chemokine receptor activity;GO:0016494//C-X-C chemokine receptor activity;GO:0019956//chemokine binding;GO:0019957//C-C chemokine binding;GO:0019958//C-X-C chemokine binding	GO:0006935//chemotaxis;GO:0006954//inflammatory response;GO:0006955//immune response;GO:0007165//signal transduction;GO:0007186//G-protein coupled receptor signaling pathway;GO:0007204//positive regulation of cytosolic calcium ion concentration;GO:0019722//calcium-mediated signaling;GO:0060326//cell chemotaxis;GO:0070098//chemokine-mediated signaling pathway
ENSMUSG00000041324	49	27	28	151	312	119	0.97	0.55	0.21	1.79	4.41	1.26	0.576666666666667	2.48666666666667	2.10840359261851	1.7241950532443e-08	5.25617256250424e-07	Inhba	inhibin beta-A [Source:MGI Symbol;Acc:MGI:96570]	Environmental Information Processing;Cellular Processes;Environmental Information Processing	Signaling molecules and interaction;Cellular community - eukaryotes;Signal transduction	ko04060//Cytokine-cytokine receptor interaction;ko04550//Signaling pathways regulating pluripotency of stem cells;ko04350//TGF-beta signaling pathway	K04667;K04667;K04667	GO:0005576//extracellular region;GO:0005615//extracellular space;GO:0043509//activin A complex;GO:0043512//inhibin A complex;GO:0048471//perinuclear region of cytoplasm	GO:0005102//receptor binding;GO:0005125//cytokine activity;GO:0005179//hormone activity;GO:0008083//growth factor activity;GO:0017046//peptide hormone binding;GO:0034711//inhibin binding;GO:0042802//identical protein binding;GO:0044877//macromolecular complex binding;GO:0070699//type II activin receptor binding	GO:0000082//G1/S transition of mitotic cell cycle;GO:0001541//ovarian follicle development;GO:0001707//mesoderm formation;GO:0001942//hair follicle development;GO:0002244//hematopoietic progenitor cell differentiation;GO:0006357//regulation of transcription from RNA polymerase II promoter;GO:0007050//cell cycle arrest;GO:0008285//negative regulation of cell proliferation;GO:0008584//male gonad de…
ENSMUSG00000028268	693	597	521	1024	2270	2509	12.74	9.69	9.49	20.80	45.69	45.54	10.64	37.3433333333333	1.81135256003604	1.81750646166677e-08	5.5092090950523e-07	Gbp3	guanylate binding protein 3 [Source:MGI Symbol;Acc:MGI:1926263]	Organismal Systems	Immune system	ko04621//NOD-like receptor signaling pathway	K20899	GO:0000139//Golgi membrane;GO:0005634//nucleus;GO:0005737//cytoplasm;GO:0005794//Golgi apparatus;GO:0005829//cytosol;GO:0005886//plasma membrane;GO:0016020//membrane;GO:0020005//symbiont-containing vacuole membrane;GO:0031410//cytoplasmic vesicle;GO:0048471//perinuclear region of cytoplasm	GO:0000166//nucleotide binding;GO:0003924//GTPase activity;GO:0005525//GTP binding;GO:0016787//hydrolase activity;GO:0042803//protein homodimerization activity	GO:0035458//cellular response to interferon-beta;GO:0042832//defense response to protozoan;GO:0044406//adhesion of symbiont to host;GO:0050830//defense response to Gram-positive bacterium;GO:0071346//cellular response to interferon-gamma
ENSMUSG00000003882	486	362	299	1383	1709	695	6.48	4.83	3.93	18.94	26.50	10.63	5.08	18.69	1.87936616697299	1.82982832762402e-08	5.53609381763231e-07	Il7r	interleukin 7 receptor [Source:MGI Symbol;Acc:MGI:96562]	Human Diseases;Environmental Information Processing;Environmental Information Processing;Organismal Systems;Environmental Information Processing;Human Diseases;Environmental Information Processing	Cancers;Signal transduction;Signaling molecules and interaction;Immune system;Signal transduction;Immune diseases;Signal transduction	ko05200//Pathways in cancer;ko04151//PI3K-Akt signaling pathway;ko04060//Cytokine-cytokine receptor interaction;ko04640//Hematopoietic cell lineage;ko04630//Jak-STAT signaling pathway;ko05340//Primary immunodeficiency;ko04068//FoxO signaling pathway	K05072;K05072;K05072;K05072;K05072;K05072;K05072	GO:0005886//plasma membrane;GO:0009897//external side of plasma membrane;GO:0016020//membrane;GO:0016021//integral component of membrane	GO:0004896//cytokine receptor activity;GO:0005515//protein binding	GO:0000902//cell morphogenesis;GO:0001915//negative regulation of T cell mediated cytotoxicity;GO:0002377//immunoglobulin production;GO:0008284//positive regulation of cell proliferation;GO:0008361//regulation of cell size;GO:0010628//positive regulation of gene expression;GO:0019221//cytokine-mediated signaling pathway;GO:0030217//T cell differentiation;GO:0033089//positive regulation of T cell …
ENSMUSG00000095682	4	5	4	6223	14	1495	0.47	0.58	0.49	697.97	1.82	185.17	0.513333333333333	294.986666666667	9.16653808602103	1.86841324393411e-08	5.6421857563999e-07	Igkv3-1	immunoglobulin kappa variable 3-1 [Source:MGI Symbol;Acc:MGI:1330851]	-	-	-	-	GO:0005615//extracellular space	-	GO:0002377//immunoglobulin production;GO:0006955//immune response
ENSMUSG00000029366	355	310	255	539	673	652	4.87	4.21	3.64	7.05	10.23	9.42	4.24	8.9	1.06974107129056	1.88331238696005e-08	5.67648761746323e-07	Dck	deoxycytidine kinase [Source:MGI Symbol;Acc:MGI:102726]	Metabolism;Metabolism;Metabolism	Global and overview maps;Nucleotide metabolism;Nucleotide metabolism	ko01100//Metabolic pathways;ko00230//Purine metabolism;ko00240//Pyrimidine metabolism	K00893;K00893;K00893	GO:0005634//nucleus;GO:0005654//nucleoplasm;GO:0005737//cytoplasm;GO:0005739//mitochondrion;GO:0005829//cytosol	GO:0000166//nucleotide binding;GO:0000287//magnesium ion binding;GO:0004136//deoxyadenosine kinase activity;GO:0004137//deoxycytidine kinase activity;GO:0004138//deoxyguanosine kinase activity;GO:0005524//ATP binding;GO:0008144//drug binding;GO:0016301//kinase activity;GO:0016740//transferase activity;GO:0019136//deoxynucleoside kinase activity;GO:0019206//nucleoside kinase activity;GO:0032548//p…	GO:0006139//nucleobase-containing compound metabolic process;GO:0006170//dAMP biosynthetic process;GO:0006220//pyrimidine nucleotide metabolic process;GO:0009157//deoxyribonucleoside monophosphate biosynthetic process;GO:0009165//nucleotide biosynthetic process;GO:0016310//phosphorylation;GO:0017144//drug metabolic process;GO:0046092//deoxycytidine metabolic process
ENSMUSG00000063779	19	1	94	7305	5900	6914	0.52	0.03	2.69	191.13	179.39	199.77	1.08	190.096666666667	7.45955811202562	1.92188598747707e-08	5.77105651857581e-07	Chil4	chitinase-like 4 [Source:MGI Symbol;Acc:MGI:1341098]	-	-	-	-	GO:0005576//extracellular region;GO:0005737//cytoplasm	GO:0004568//chitinase activity;GO:0008061//chitin binding	GO:0005975//carbohydrate metabolic process;GO:0006032//chitin catabolic process;GO:0006954//inflammatory response
ENSMUSG00000030413	319	192	248	853	504	562	19.42	11.56	15.75	49.73	33.98	36.04	15.5766666666667	39.9166666666667	1.3576047136461	1.93032628949219e-08	5.78556673869293e-07	Pglyrp1	peptidoglycan recognition protein 1 [Source:MGI Symbol;Acc:MGI:1345092]	-	-	-	-	GO:0005576//extracellular region;GO:0005615//extracellular space;GO:0005737//cytoplasm	GO:0005125//cytokine activity;GO:0008270//zinc ion binding;GO:0008745//N-acetylmuramoyl-L-alanine amidase activity;GO:0016019//peptidoglycan receptor activity;GO:0042834//peptidoglycan binding	GO:0002376//immune system process;GO:0006915//apoptotic process;GO:0007165//signal transduction;GO:0009253//peptidoglycan catabolic process;GO:0009617//response to bacterium;GO:0016045//detection of bacterium;GO:0031640//killing of cells of other organism;GO:0032689//negative regulation of interferon-gamma production;GO:0032827//negative regulation of natural killer cell differentiation involved …
ENSMUSG00000049103	583	590	296	1328	1011	1535	7.26	7.08	3.94	15.37	13.48	19.57	6.09333333333333	16.14	1.40533700894087	2.10685935570572e-08	6.29115265712128e-07	Ccr2	chemokine (C-C motif) receptor 2 [Source:MGI Symbol;Acc:MGI:106185]	Environmental Information Processing;Organismal Systems;Environmental Information Processing	Signaling molecules and interaction;Immune system;Signaling molecules and interaction	ko04060//Cytokine-cytokine receptor interaction;ko04062//Chemokine signaling pathway;ko04061//Viral protein interaction with cytokine and cytokine receptor	K04177;K04177;K04177	GO:0005623//cell;GO:0005737//cytoplasm;GO:0005829//cytosol;GO:0005886//plasma membrane;GO:0005887//integral component of plasma membrane;GO:0009897//external side of plasma membrane;GO:0016020//membrane;GO:0016021//integral component of membrane;GO:0030425//dendrite;GO:0043025//neuronal cell body;GO:0043204//perikaryon;GO:0048471//perinuclear region of cytoplasm	GO:0004930//G-protein coupled receptor activity;GO:0004950//chemokine receptor activity;GO:0005515//protein binding;GO:0016493//C-C chemokine receptor activity;GO:0019955//cytokine binding;GO:0019956//chemokine binding;GO:0019957//C-C chemokine binding;GO:0031727//CCR2 chemokine receptor binding;GO:0035715//chemokine (C-C motif) ligand 2 binding;GO:0035716//chemokine (C-C motif) ligand 12 binding…	GO:0001525//angiogenesis;GO:0001974//blood vessel remodeling;GO:0002246//wound healing involved in inflammatory response;GO:0002548//monocyte chemotaxis;GO:0002724//regulation of T cell cytokine production;GO:0002827//positive regulation of T-helper 1 type immune response;GO:0002829//negative regulation of type 2 immune response;GO:0006874//cellular calcium ion homeostasis;GO:0006935//chemotaxis;…
ENSMUSG00000024079	590	571	598	984	2528	2089	6.35	6.13	6.58	9.73	28.31	24.11	6.35333333333333	20.7166666666667	1.70520627202991	2.55521368290634e-08	7.531774155405e-07	Eif2ak2	eukaryotic translation initiation factor 2-alpha kinase 2 [Source:MGI Symbol;Acc:MGI:1353449]	Human Diseases;Human Diseases;Human Diseases;Human Diseases;Human Diseases;Human Diseases;Human Diseases;Cellular Processes;Human Diseases;Genetic Information Processing;Human Diseases	Infectious diseases;Infectious diseases;Infectious diseases;Neurodegenerative diseases;Cancers;Infectious diseases;Infectious diseases;Cell growth and death;Infectious diseases;Folding, sorting and degradation;Infectious diseases	ko05168//Herpes simplex infection;ko05169//Epstein-Barr virus infection;ko05165//Human papillomavirus infection;ko05010//Alzheimer disease;ko05203//Viral carcinogenesis;ko05167//Kaposi sarcoma-associated herpesvirus infection;ko05164//Influenza A;ko04217//Necroptosis;ko05160//Hepatitis C;ko04141//Protein processing in endoplasmic reticulum;ko05162//Measles	K16195;K16195;K16195;K16195;K16195;K16195;K16195;K16195;K16195;K16195;K16195	GO:0005634//nucleus;GO:0005737//cytoplasm;GO:0005829//cytosol;GO:0048471//perinuclear region of cytoplasm	GO:0000166//nucleotide binding;GO:0003723//RNA binding;GO:0003725//double-stranded RNA binding;GO:0004672//protein kinase activity;GO:0004674//protein serine/threonine kinase activity;GO:0004694//eukaryotic translation initiation factor 2alpha kinase activity;GO:0004713//protein tyrosine kinase activity;GO:0004715//non-membrane spanning protein tyrosine kinase activity;GO:0005515//protein binding…	GO:0000186//activation of MAPKK activity;GO:0001819//positive regulation of cytokine production;GO:0002376//immune system process;GO:0006412//translation;GO:0006468//protein phosphorylation;GO:0009615//response to virus;GO:0009636//response to toxic substance;GO:0010998//regulation of translational initiation by eIF2 alpha phosphorylation;GO:0016310//phosphorylation;GO:0017148//negative regulatio…
ENSMUSG00000076569	1	2	2	35	148	829	0.12	0.24	0.25	4.18	20.47	107.35	0.203333333333333	44	7.75751297157029	2.90886830166586e-08	8.49612080459235e-07	Igkv5-39	immunoglobulin kappa variable 5-39 [Source:MGI Symbol;Acc:MGI:2686255]	-	-	-	-	GO:0005615//extracellular space	-	GO:0002377//immunoglobulin production;GO:0006955//immune response
ENSMUSG00000034422	3252	3364	3165	5046	9470	8766	18.50	18.95	18.76	27.40	59.74	52.55	18.7366666666667	46.5633333333333	1.31333002608491	3.01219609185897e-08	8.76598263756054e-07	Parp14	poly (ADP-ribose) polymerase family, member 14 [Source:MGI Symbol;Acc:MGI:1919489]	-	-	-	-	GO:0005634//nucleus;GO:0005737//cytoplasm;GO:0005829//cytosol;GO:0005886//plasma membrane	GO:0003950//NAD+ ADP-ribosyltransferase activity;GO:0005515//protein binding;GO:0016740//transferase activity;GO:0016757//transferase activity, transferring glycosyl groups;GO:0019899//enzyme binding;GO:0070403//NAD+ binding;GO:1990404//protein ADP-ribosylase activity	GO:0002376//immune system process;GO:0006471//protein ADP-ribosylation;GO:0010629//negative regulation of gene expression;GO:0042531//positive regulation of tyrosine phosphorylation of STAT protein;GO:0042532//negative regulation of tyrosine phosphorylation of STAT protein;GO:0045087//innate immune response;GO:0060336//negative regulation of interferon-gamma-mediated signaling pathway;GO:0070212/…
ENSMUSG00000021322	52	43	29	118	120	156	0.78	0.99	0.53	2.05	2.43	3.10	0.766666666666667	2.52666666666667	1.72056398722672	3.23379534495035e-08	9.37683695411915e-07	Aoah	acyloxyacyl hydrolase [Source:MGI Symbol;Acc:MGI:1350928]	-	-	-	-	GO:0005576//extracellular region;GO:0031410//cytoplasmic vesicle	GO:0005509//calcium ion binding;GO:0016787//hydrolase activity;GO:0016788//hydrolase activity, acting on ester bonds;GO:0046872//metal ion binding;GO:0050528//acyloxyacyl hydrolase activity	GO:0006629//lipid metabolic process;GO:0006631//fatty acid metabolic process;GO:0008653//lipopolysaccharide metabolic process;GO:0009104//lipopolysaccharide catabolic process;GO:0050728//negative regulation of inflammatory response
ENSMUSG00000060044	96	126	112	229	283	239	0.90	1.22	0.98	1.83	2.88	2.18	1.03333333333333	2.29666666666667	1.15223576743006	3.30808537076157e-08	9.54049441010105e-07	Tmem26	transmembrane protein 26 [Source:MGI Symbol;Acc:MGI:2143537]	-	-	-	-	GO:0005575//cellular_component;GO:0016020//membrane;GO:0016021//integral component of membrane	GO:0003674//molecular_function	GO:0008150//biological_process
ENSMUSG00000030268	16	8	14	78	54	59	0.48	0.14	0.44	1.43	1.49	1.42	0.353333333333333	1.44666666666667	2.03363077788128	3.45316299954403e-08	9.9054505720373e-07	Bcat1	branched chain aminotransferase 1, cytosolic [Source:MGI Symbol;Acc:MGI:104861]	Metabolism;Metabolism;Metabolism;Metabolism;Metabolism;Metabolism;Metabolism	Global and overview maps;Global and overview maps;Amino acid metabolism;Amino acid metabolism;Global and overview maps;Metabolism of cofactors and vitamins;Amino acid metabolism	ko01100//Metabolic pathways;ko01230//Biosynthesis of amino acids;ko00280//Valine, leucine and isoleucine degradation;ko00270//Cysteine and methionine metabolism;ko01210//2-Oxocarboxylic acid metabolism;ko00770//Pantothenate and CoA biosynthesis;ko00290//Valine, leucine and isoleucine biosynthesis	K00826;K00826;K00826;K00826;K00826;K00826;K00826	GO:0005737//cytoplasm;GO:0005739//mitochondrion;GO:0005829//cytosol	GO:0003824//catalytic activity;GO:0004084//branched-chain-amino-acid transaminase activity;GO:0008483//transaminase activity;GO:0016740//transferase activity;GO:0042802//identical protein binding;GO:0052654//L-leucine transaminase activity;GO:0052655//L-valine transaminase activity;GO:0052656//L-isoleucine transaminase activity	GO:0008652//cellular amino acid biosynthetic process;GO:0009081//branched-chain amino acid metabolic process;GO:0009082//branched-chain amino acid biosynthetic process;GO:0009083//branched-chain amino acid catabolic process;GO:0009098//leucine biosynthetic process;GO:0009099//valine biosynthetic process
ENSMUSG00000070031	313	312	405	628	802	682	5.74	5.64	7.69	11.87	17.78	13.52	6.35666666666667	14.39	1.1787242491487	3.72673513775027e-08	1.06711067738974e-06	Sp140	Sp140 nuclear body protein [Source:MGI Symbol;Acc:MGI:3702467]	-	-	-	-	GO:0001650//fibrillar center;GO:0005634//nucleus;GO:0005739//mitochondrion;GO:0016604//nuclear body	GO:0000978//RNA polymerase II core promoter proximal region sequence-specific DNA binding;GO:0003677//DNA binding;GO:0005515//protein binding;GO:0046872//metal ion binding	GO:0006357//regulation of transcription from RNA polymerase II promoter
ENSMUSG00000093938	183	215	162	358	440	355	4.17	4.84	3.82	7.75	11.09	8.49	4.27666666666667	9.11	1.09096428943352	4.21081744312072e-08	1.20357322104172e-06	Evi2b	ecotropic viral integration site 2b [Source:MGI Symbol;Acc:MGI:1890682]	-	-	-	-	GO:0016020//membrane;GO:0016021//integral component of membrane	GO:0003674//molecular_function	GO:0030854//positive regulation of granulocyte differentiation;GO:0043066//negative regulation of apoptotic process;GO:0045660//positive regulation of neutrophil differentiation;GO:0061515//myeloid cell development;GO:0071157//negative regulation of cell cycle arrest;GO:2000035//regulation of stem cell division
ENSMUSG00000036381	121	123	113	270	198	232	2.93	3.11	2.99	6.39	5.76	6.09	3.01	6.08	1.01430783668388	4.54218234463038e-08	1.28454839323013e-06	P2ry14	purinergic receptor P2Y, G-protein coupled, 14 [Source:MGI Symbol;Acc:MGI:2155705]	Environmental Information Processing	Signaling molecules and interaction	ko04080//Neuroactive ligand-receptor interaction	K04299	GO:0005886//plasma membrane;GO:0016020//membrane;GO:0016021//integral component of membrane	GO:0004930//G-protein coupled receptor activity;GO:0045028//G-protein coupled purinergic nucleotide receptor activity	GO:0006955//immune response;GO:0007165//signal transduction;GO:0007186//G-protein coupled receptor signaling pathway;GO:0035589//G-protein coupled purinergic nucleotide receptor signaling pathway
ENSMUSG00000030093	268	446	303	122	127	148	3.56	5.87	4.20	1.55	1.87	2.07	4.54333333333333	1.83	-1.31190750780001	4.59538563408985e-08	1.29502651393024e-06	Wnt7a	wingless-type MMTV integration site family, member 7A [Source:MGI Symbol;Acc:MGI:98961]	Human Diseases;Human Diseases;Human Diseases;Human Diseases;Human Diseases;Human Diseases;Environmental Information Processing;Environmental Information Processing;Environmental Information Processing;Human Diseases;Human Diseases;Cellular Processes;Organismal Systems;Human Diseases	Cancers;Infectious diseases;Neurodegenerative diseases;Cancers;Cancers;Endocrine and metabolic diseases;Signal transduction;Signal transduction;Signal transduction;Cancers;Cancers;Cellular community - eukaryotes;Endocrine system;Cancers	ko05200//Pathways in cancer;ko05165//Human papillomavirus infection;ko05010//Alzheimer disease;ko05205//Proteoglycans in cancer;ko05225//Hepatocellular carcinoma;ko04934//Cushing syndrome;ko04310//Wnt signaling pathway;ko04150//mTOR signaling pathway;ko04390//Hippo signaling pathway;ko05226//Gastric cancer;ko05224//Breast cancer;ko04550//Signaling pathways regulating pluripotency of stem cells;ko…	K00572;K00572;K00572;K00572;K00572;K00572;K00572;K00572;K00572;K00572;K00572;K00572;K00572;K00572	GO:0005576//extracellular region;GO:0005615//extracellular space;GO:0005788//endoplasmic reticulum lumen;GO:0009986//cell surface;GO:0031012//extracellular matrix;GO:0098793//presynapse	GO:0005102//receptor binding;GO:0005109//frizzled binding;GO:0005125//cytokine activity;GO:0048018//receptor agonist activity	GO:0000578//embryonic axis specification;GO:0001502//cartilage condensation;GO:0001525//angiogenesis;GO:0002062//chondrocyte differentiation;GO:0007165//signal transduction;GO:0007267//cell-cell signaling;GO:0007269//neurotransmitter secretion;GO:0007275//multicellular organism development;GO:0008284//positive regulation of cell proliferation;GO:0009887//organ morphogenesis;GO:0009953//dorsal/ven…
ENSMUSG00000059089	196	156	136	399	275	424	6.58	5.19	4.76	12.80	10.24	15.01	5.51	12.6833333333333	1.20280972909859	5.15260201090337e-08	1.43940719938738e-06	Fcgr4	Fc receptor, IgG, low affinity IV [Source:MGI Symbol;Acc:MGI:2179523]	Cellular Processes;Human Diseases;Human Diseases;Human Diseases;Organismal Systems;Organismal Systems;Human Diseases;Organismal Systems	Transport and catabolism;Infectious diseases;Immune diseases;Infectious diseases;Immune system;Immune system;Infectious diseases;Development	ko04145//Phagosome;ko05152//Tuberculosis;ko05322//Systemic lupus erythematosus;ko05150//Staphylococcus aureus infection;ko04650//Natural killer cell mediated cytotoxicity;ko04666//Fc gamma R-mediated phagocytosis;ko05140//Leishmaniasis;ko04380//Osteoclast differentiation	K06463;K06463;K06463;K06463;K06463;K06463;K06463;K06463	GO:0005886//plasma membrane;GO:0009897//external side of plasma membrane;GO:0009986//cell surface;GO:0016020//membrane;GO:0016021//integral component of membrane	GO:0019767//IgE receptor activity;GO:0019770//IgG receptor activity;GO:0019863//IgE binding;GO:0019864//IgG binding	GO:0038094//Fc-gamma receptor signaling pathway;GO:0038095//Fc-epsilon receptor signaling pathway;GO:0042060//wound healing;GO:0042119//neutrophil activation;GO:0045780//positive regulation of bone resorption;GO:0051930//regulation of sensory perception of pain;GO:0071222//cellular response to lipopolysaccharide
ENSMUSG00000056130	118	81	109	230	220	224	1.19	0.80	1.14	2.20	2.45	2.37	1.04333333333333	2.34	1.16530837337195	5.2400024592919e-08	1.46127720756079e-06	Ticam2	toll-like receptor adaptor molecule 2 [Source:MGI Symbol;Acc:MGI:3040056]	Environmental Information Processing;Cellular Processes;Human Diseases;Organismal Systems;Human Diseases;Human Diseases	Signal transduction;Cell growth and death;Infectious diseases;Immune system;Cancer: overview;Infectious diseases	ko04064//NF-kappa B signaling pathway;ko04217//Necroptosis;ko05161//Hepatitis B;ko04620//Toll-like receptor signaling pathway;ko05235//PD-L1 expression and PD-1 checkpoint pathway in cancer;ko05133//Pertussis	K05409;K05409;K05409;K05409;K05409;K05409	GO:0001891//phagocytic cup;GO:0005737//cytoplasm;GO:0005768//endosome;GO:0005769//early endosome;GO:0005770//late endosome;GO:0005783//endoplasmic reticulum;GO:0005793//endoplasmic reticulum-Golgi intermediate compartment;GO:0005794//Golgi apparatus;GO:0005886//plasma membrane;GO:0016020//membrane;GO:0030134//ER to Golgi transport vesicle;GO:0042995//cell projection;GO:0045323//interleukin-1 rece…	GO:0005149//interleukin-1 receptor binding;GO:0005515//protein binding;GO:0005543//phospholipid binding;GO:0046982//protein heterodimerization activity	GO:0001817//regulation of cytokine production;GO:0002376//immune system process;GO:0006886//intracellular protein transport;GO:0006888//ER to Golgi vesicle-mediated transport;GO:0006909//phagocytosis;GO:0006954//inflammatory response;GO:0007030//Golgi organization;GO:0007165//signal transduction;GO:0032729//positive regulation of interferon-gamma production;GO:0032755//positive regulation of inte…
ENSMUSG00000045312	401	367	440	1191	2139	755	3.89	3.94	4.52	11.35	23.75	7.92	4.11666666666667	14.34	1.80049648295102	6.30452418238773e-08	1.73401449853494e-06	Lhfpl2	lipoma HMGIC fusion partner-like 2 [Source:MGI Symbol;Acc:MGI:2145236]	-	-	-	-	GO:0005575//cellular_component;GO:0016020//membrane;GO:0016021//integral component of membrane	GO:0003674//molecular_function	GO:0007338//single fertilization;GO:0046545//development of primary female sexual characteristics;GO:0046546//development of primary male sexual characteristics
ENSMUSG00000047415	75	61	41	186	199	139	1.32	1.00	0.58	2.83	2.96	1.98	0.966666666666667	2.59	1.42186169839277	6.35419434120552e-08	1.74468332639093e-06	Gpr68	G protein-coupled receptor 68 [Source:MGI Symbol;Acc:MGI:2441763]	-	-	-	-	GO:0005886//plasma membrane;GO:0016020//membrane;GO:0016021//integral component of membrane	GO:0004930//G-protein coupled receptor activity	GO:0007165//signal transduction;GO:0007186//G-protein coupled receptor signaling pathway;GO:0032024//positive regulation of insulin secretion;GO:0035774//positive regulation of insulin secretion involved in cellular response to glucose stimulus;GO:0045656//negative regulation of monocyte differentiation;GO:0071467//cellular response to pH;GO:2001206//positive regulation of osteoclast development
ENSMUSG00000049502	2293	2020	1683	3131	4885	4932	18.69	16.03	14.30	25.00	43.78	41.76	16.34	36.8466666666667	1.17312612834732	6.39768639298934e-08	1.75362224464246e-06	Dtx3l	deltex 3-like, E3 ubiquitin ligase [Source:MGI Symbol;Acc:MGI:2656973]	Environmental Information Processing	Signal transduction	ko04330//Notch signaling pathway	K06058	GO:0005634//nucleus;GO:0005654//nucleoplasm;GO:0005737//cytoplasm;GO:0005764//lysosome;GO:0005765//lysosomal membrane;GO:0005768//endosome;GO:0005769//early endosome;GO:0005829//cytosol;GO:0016020//membrane;GO:0031901//early endosome membrane;GO:0032991//macromolecular complex	GO:0004842//ubiquitin-protein transferase activity;GO:0004857//enzyme inhibitor activity;GO:0008047//enzyme activator activity;GO:0016740//transferase activity;GO:0019899//enzyme binding;GO:0042393//histone binding;GO:0044389//ubiquitin-like protein ligase binding;GO:0046872//metal ion binding;GO:0061630//ubiquitin protein ligase activity;GO:0097677//STAT family protein binding	GO:0002230//positive regulation of defense response to virus by host;GO:0002376//immune system process;GO:0006281//DNA repair;GO:0006302//double-strand break repair;GO:0006325//chromatin organization;GO:0006511//ubiquitin-dependent protein catabolic process;GO:0006974//cellular response to DNA damage stimulus;GO:0007219//Notch signaling pathway;GO:0008333//endosome to lysosome transport;GO:001039…
ENSMUSG00000095753	0	3	1	11	100	120	0.00	0.34	0.15	1.21	13.05	14.54	0.163333333333333	9.6	5.87714325221447	6.67999071750928e-08	1.82166073393301e-06	Igkv4-53	immunoglobulin kappa variable 4-53 [Source:MGI Symbol;Acc:MGI:2686266]	-	-	-	-	GO:0005615//extracellular space	-	GO:0002377//immunoglobulin production;GO:0006955//immune response
ENSMUSG00000039981	108	196	131	338	344	349	1.11	2.00	1.41	3.33	3.93	3.79	1.50666666666667	3.68333333333333	1.2896516918636	7.18386514703351e-08	1.95242843445224e-06	Zc3h12d	zinc finger CCCH type containing 12D [Source:MGI Symbol;Acc:MGI:3045313]	-	-	-	-	GO:0000932//cytoplasmic mRNA processing body;GO:0005654//nucleoplasm;GO:0036464//cytoplasmic ribonucleoprotein granule	GO:0046872//metal ion binding	-
ENSMUSG00000073208	17	11	11	56	59	61	0.72	0.41	0.42	1.93	3.11	3.01	0.516666666666667	2.68333333333333	2.37672056772774	7.53304839683451e-08	2.03354261015558e-06	Speer4c	spermatogenesis associated glutamate (E)-rich protein 4C [Source:MGI Symbol;Acc:MGI:1914023]	-	-	-	-	GO:0005575//cellular_component	GO:0003674//molecular_function	GO:0008150//biological_process
ENSMUSG00000079339	63	74	49	134	235	233	1.21	1.41	0.98	2.45	5.00	4.71	1.2	4.05333333333333	1.75607441711391	8.04008583613805e-08	2.15589927060993e-06	Ifit1bl1	interferon induced protein with tetratricpeptide repeats 1B like 1 [Source:MGI Symbol;Acc:MGI:3650685]	Human Diseases	Infectious diseases	ko05160//Hepatitis C	K14217	GO:0005737//cytoplasm;GO:0005829//cytosol	GO:0003723//RNA binding;GO:0005515//protein binding	GO:0009615//response to virus;GO:0050688//regulation of defense response to virus;GO:0051607//defense response to virus;GO:0071357//cellular response to type I interferon;GO:0071360//cellular response to exogenous dsRNA
ENSMUSG00000006269	63	58	61	145	123	146	1.34	1.22	1.60	3.21	2.91	3.27	1.38666666666667	3.13	1.17454162951268	8.29494812876168e-08	2.2057959078722e-06	Atp6v1b1	ATPase, H+ transporting, lysosomal V1 subunit B1 [Source:MGI Symbol;Acc:MGI:103285]	Metabolism;Human Diseases;Cellular Processes;Human Diseases;Environmental Information Processing;Metabolism;Organismal Systems;Human Diseases;Human Diseases;Organismal Systems	Global and overview maps;Infectious diseases;Transport and catabolism;Immune diseases;Signal transduction;Energy metabolism;Nervous system;Infectious diseases;Infectious diseases;Excretory system	ko01100//Metabolic pathways;ko05165//Human papillomavirus infection;ko04145//Phagosome;ko05323//Rheumatoid arthritis;ko04150//mTOR signaling pathway;ko00190//Oxidative phosphorylation;ko04721//Synaptic vesicle cycle;ko05120//Epithelial cell signaling in Helicobacter pylori infection;ko05110//Vibrio cholerae infection;ko04966//Collecting duct acid secretion	K02147;K02147;K02147;K02147;K02147;K02147;K02147;K02147;K02147;K02147	GO:0005737//cytoplasm;GO:0005829//cytosol;GO:0005902//microvillus;GO:0008021//synaptic vesicle;GO:0016020//membrane;GO:0016323//basolateral plasma membrane;GO:0016324//apical plasma membrane;GO:0016328//lateral plasma membrane;GO:0016471//vacuolar proton-transporting V-type ATPase complex;GO:0033180//proton-transporting V-type ATPase, V1 domain;GO:0098850//extrinsic component of synaptic vesicle …	GO:0005524//ATP binding;GO:0015078//hydrogen ion transmembrane transporter activity;GO:0044877//macromolecular complex binding	GO:0001503//ossification;GO:0003091//renal water homeostasis;GO:0003096//renal sodium ion transport;GO:0006693//prostaglandin metabolic process;GO:0006811//ion transport;GO:0006885//regulation of pH;GO:0007588//excretion;GO:0007605//sensory perception of sound;GO:0010468//regulation of gene expression;GO:0030534//adult behavior;GO:0035812//renal sodium excretion;GO:0042048//olfactory behavior;GO:…
ENSMUSG00000028362	46	44	26	116	131	109	0.51	0.48	0.30	1.23	1.61	1.27	0.43	1.37	1.67176732825843	8.40249448426186e-08	2.23069534859502e-06	Tnfsf8	tumor necrosis factor (ligand) superfamily, member 8 [Source:MGI Symbol;Acc:MGI:88328]	Environmental Information Processing	Signaling molecules and interaction	ko04060//Cytokine-cytokine receptor interaction	K05471	GO:0005615//extracellular space;GO:0016020//membrane;GO:0016021//integral component of membrane	GO:0005125//cytokine activity;GO:0005164//tumor necrosis factor receptor binding;GO:0005515//protein binding	GO:0006955//immune response;GO:0007165//signal transduction;GO:0043374//CD8-positive, alpha-beta T cell differentiation;GO:0045944//positive regulation of transcription from RNA polymerase II promoter;GO:0050830//defense response to Gram-positive bacterium
[truncated: 541 more rows]
