# Supplementary material for: A Combined Transcriptomic and Proteomic Approach to Reveal the Effect of Mogroside V on OVA-Induced Pulmonary Inflammation in Mice
Source: Frontiers journal article supplement (doi:10.3389/fimmu.2022.800143), 2022-03-18
Supplement: Data_Sheet_3.ZIP [file all.samples.PC_data.xls]

id	PC1(84.5%)	PC2(12.7%)	PC3(1.4%)	PC4(0.6%)	PC5(0.4%)	PC6(0.3%)	PC7(0.2%)	PC8(0.1%)	PC9(0%)
K-1	-227528671.560798	-117030028.863997	-47384370.385687	-6546473.55525154	41912107.0064244	-7026512.45176839	14110519.3464214	-15751697.5159976	-7.90023477748036e-07
K-2	-562399706.005991	-174401762.519129	25407746.0646048	32888296.7838348	4007919.1286979	13031028.7737333	-12268508.4593239	13671865.8023983	-1.83773227035999e-06
K-3	451439080.219323	-181904249.836873	26827089.7898435	-39700761.7925757	-12795310.5771394	29266359.0663444	739724.389263927	-3679633.87362645	1.54401641339064e-06
C-1	597562739.086267	69350025.2925632	28827214.9579974	20663522.6319772	34578014.1840377	-9860811.03016875	5926559.14980761	15098915.9518208	1.87526165973395e-06
C-2	-8706735.14742168	117590489.105885	-102142879.54055	-17131537.975853	-9948578.43135477	11206754.0940872	-5727997.20980062	13326850.52549	-6.68951543048024e-08
C-3	73708635.6518106	189314986.532456	10669413.5169461	39251228.9944326	-3634921.25586372	21488111.7697464	-11649956.5163306	-18721783.4397454	2.40659574046731e-07
V-1	127714827.448477	-61356146.0101842	952997.367402705	-11472786.7966292	-13536890.2577204	-38993572.5214524	-27351648.4004756	-5744999.77503057	4.84520569443703e-07
V-2	6309817.7347396	-35632058.4496321	-3416487.80068476	27520815.0190283	-42584314.842868	-14751522.6499387	28703813.9805225	-434563.364248634	1.58324837684631e-07
V-3	-458099987.426408	194068744.748911	60259276.030127	-45472303.3089637	2001975.04578625	-4359835.05058304	7517493.71991528	2235045.68893965	-1.57949398271739e-06
