# Supplementary material for: A Combined Transcriptomic and Proteomic Approach to Reveal the Effect of Mogroside V on OVA-Induced Pulmonary Inflammation in Mice
Source: Frontiers journal article supplement (doi:10.3389/fimmu.2022.800143), 2022-03-18
Supplement: Data_Sheet_3.ZIP [file C-vs-V.filter.annot.xls]

id	C-1	C-2	C-3	V-1	V-2	V-3	C_mean	V_mean	log2(fc)	PValue	FDR	Symbol	Description	KEGG_A_class	KEGG_B_class	Pathway	K_ID	GO Component	GO Function	GO Process
ENSMUST00000190193	478457.71875	473927.40625	3026351.25	212709.046875	152421.28125	285670.03125	1326245.45833333	216933.453125	-2.6120233586405	1.09400540892516e-20	3.36133161892256e-17	Col6a5	collagen, type VI, alpha 5 [Source:MGI Symbol;Acc:MGI:3648134]	Environmental Information Processing;Human Diseases;Cellular Processes;Environmental Information Processing;Organismal Systems	Signal transduction;Infectious diseases;Cellular community - eukaryotes;Signaling molecules and interaction;Digestive system	ko04151//PI3K-Akt signaling pathway;ko05165//Human papillomavirus infection;ko04510//Focal adhesion;ko04512//ECM-receptor interaction;ko04974//Protein digestion and absorption	K06238;K06238;K06238;K06238;K06238	-	-	-
ENSMUST00000142734	3446117.5	1973659.875	1735643	873166.75	883716.75	742465.875	2385140.125	833116.458333333	-1.51748394193876	2.68983869647075e-18	5.50968626327093e-15	Lgals3	lectin, galactose binding, soluble 3 [Source:MGI Symbol;Acc:MGI:96778]	-	-	-	-	GO:0001772//immunological synapse;GO:0005634//nucleus;GO:0005737//cytoplasm;GO:0005743//mitochondrial inner membrane	GO:0019863//IgE binding;GO:0019903//protein phosphatase binding;GO:0030246//carbohydrate binding;GO:0042056//chemoattractant activity;GO:0043236//laminin binding	GO:0002548//monocyte chemotaxis;GO:0030593//neutrophil chemotaxis;GO:0030855//epithelial cell differentiation;GO:0031334//positive regulation of protein complex assembly;GO:0042129//regulation of T cell proliferation;GO:0045806//negative regulation of endocytosis;GO:0048245//eosinophil chemotaxis;GO:0048246//macrophage chemotaxis;GO:0050918//positive chemotaxis;GO:0070232//regulation of T cell ap…
ENSMUST00000146468	3446117.5	1973659.875	1735643	873166.75	883716.75	742465.875	2385140.125	833116.458333333	-1.51748394193876	2.68983869647075e-18	5.50968626327093e-15	Lgals3	lectin, galactose binding, soluble 3 [Source:MGI Symbol;Acc:MGI:96778]	-	-	-	-	-	GO:0030246//carbohydrate binding	-
ENSMUST00000150290	3446117.5	1973659.875	1735643	873166.75	883716.75	742465.875	2385140.125	833116.458333333	-1.51748394193876	2.68983869647075e-18	5.50968626327093e-15	Lgals3	lectin, galactose binding, soluble 3 [Source:MGI Symbol;Acc:MGI:96778]	-	-	-	-	-	GO:0030246//carbohydrate binding	-
ENSMUST00000033185	4857761	7593258	11245700	3487622.25	7356512.5	4629604.5	7898906.33333333	5157913.08333333	-0.614865452177108	2.70302412309685e-17	4.15252080910753e-14	Hpx	hemopexin [Source:MGI Symbol;Acc:MGI:105112]	-	-	-	-	GO:0005576//extracellular region;GO:0005615//extracellular space;GO:0005623//cell	GO:0015232//heme transporter activity;GO:0020037//heme binding;GO:0046872//metal ion binding	GO:0002639//positive regulation of immunoglobulin production;GO:0002925//positive regulation of humoral immune response mediated by circulating immunoglobulin;GO:0006879//cellular iron ion homeostasis;GO:0015886//heme transport;GO:0020027//hemoglobin metabolic process;GO:0042168//heme metabolic process;GO:0042531//positive regulation of tyrosine phosphorylation of STAT protein;GO:0051246//regulat…
ENSMUST00000033899	2781784	4638959	2467020.5	1165047.5	3013716.5	1389471.625	3295921.16666667	1856078.54166667	-0.828423975179534	3.94446624117962e-15	4.03979084200812e-12	Col4a2	collagen, type IV, alpha 2 [Source:MGI Symbol;Acc:MGI:88455]	Human Diseases;Environmental Information Processing;Human Diseases;Cellular Processes;Human Diseases;Organismal Systems;Environmental Information Processing;Human Diseases;Human Diseases;Organismal Systems	Cancers;Signal transduction;Infectious diseases;Cellular community - eukaryotes;Infectious diseases;Endocrine system;Signaling molecules and interaction;Endocrine and metabolic diseases;Cancers;Digestive system	ko05200//Pathways in cancer;ko04151//PI3K-Akt signaling pathway;ko05165//Human papillomavirus infection;ko04510//Focal adhesion;ko05146//Amoebiasis;ko04926//Relaxin signaling pathway;ko04512//ECM-receptor interaction;ko04933//AGE-RAGE signaling pathway in diabetic complications;ko05222//Small cell lung cancer;ko04974//Protein digestion and absorption	K06237;K06237;K06237;K06237;K06237;K06237;K06237;K06237;K06237;K06237	GO:0005576//extracellular region;GO:0005581//collagen trimer;GO:0005587//collagen type IV trimer;GO:0005604//basement membrane;GO:0005615//extracellular space;GO:0031012//extracellular matrix;GO:0062023//collagen-containing extracellular matrix	GO:0005201//extracellular matrix structural constituent;GO:0030020//extracellular matrix structural constituent conferring tensile strength	GO:0001525//angiogenesis;GO:0006351//transcription, DNA-templated;GO:0007568//aging;GO:0014823//response to activity;GO:0016525//negative regulation of angiogenesis;GO:0030198//extracellular matrix organization;GO:0035987//endodermal cell differentiation;GO:0038063//collagen-activated tyrosine kinase receptor signaling pathway;GO:0071560//cellular response to transforming growth factor beta stimu…
ENSMUST00000063062	19279532	15619464	16532072	4856179	2983133	363126	17143689.3333333	2734146	-2.64851542355637	3.60070786537069e-14	3.16090711895756e-11	Chil3	chitinase-like 3 [Source:MGI Symbol;Acc:MGI:1330860]	-	-	-	-	GO:0005576//extracellular region;GO:0005634//nucleus;GO:0005635//nuclear envelope;GO:0005737//cytoplasm;GO:0005783//endoplasmic reticulum;GO:0031410//cytoplasmic vesicle;GO:0048237//rough endoplasmic reticulum lumen	GO:0004563//beta-N-acetylhexosaminidase activity;GO:0008061//chitin binding;GO:0016787//hydrolase activity;GO:0016798//hydrolase activity, acting on glycosyl bonds;GO:0030246//carbohydrate binding;GO:0102148//N-acetyl-beta-D-galactosaminidase activity	GO:0000272//polysaccharide catabolic process;GO:0005975//carbohydrate metabolic process;GO:0006032//chitin catabolic process;GO:0006954//inflammatory response;GO:0008152//metabolic process
ENSMUST00000020238	6952792.5	5083150.5	5959095.5	2932613.75	3302821	2168452.75	5998346.16666667	2801295.83333333	-1.0984704344989	4.29237639854834e-14	3.29708162113495e-11	Hsp90b1	heat shock protein 90, beta (Grp94), member 1 [Source:MGI Symbol;Acc:MGI:98817]	Human Diseases;Environmental Information Processing;Human Diseases;Genetic Information Processing;Human Diseases;Organismal Systems;Human Diseases;Organismal Systems;Organismal Systems	Cancers;Signal transduction;Infectious diseases;Folding, sorting and degradation;Cardiovascular diseases;Endocrine system;Cancers;Immune system;Endocrine system	ko05200//Pathways in cancer;ko04151//PI3K-Akt signaling pathway;ko05132//Salmonella infection;ko04141//Protein processing in endoplasmic reticulum;ko05418//Fluid shear stress and atherosclerosis;ko04915//Estrogen signaling pathway;ko05215//Prostate cancer;ko04657//IL-17 signaling pathway;ko04918//Thyroid hormone synthesis	K09487;K09487;K09487;K09487;K09487;K09487;K09487;K09487;K09487	GO:0005576//extracellular region;GO:0005783//endoplasmic reticulum;GO:0005788//endoplasmic reticulum lumen;GO:0005789//endoplasmic reticulum membrane;GO:0005790//smooth endoplasmic reticulum;GO:0005829//cytosol;GO:0005886//plasma membrane;GO:0016529//sarcoplasmic reticulum;GO:0030496//midbody;GO:0032991//protein-containing complex;GO:0033018//sarcoplasmic reticulum lumen;GO:0034663//endoplasmic r…	GO:0000166//nucleotide binding;GO:0003723//RNA binding;GO:0005515//protein binding;GO:0005524//ATP binding;GO:0019903//protein phosphatase binding;GO:0050750//low-density lipoprotein particle receptor binding;GO:0051082//unfolded protein binding	GO:0001666//response to hypoxia;GO:0006457//protein folding;GO:0030433//ubiquitin-dependent ERAD pathway;GO:0030970//retrograde protein transport, ER to cytosol;GO:0031247//actin rod assembly;GO:0043066//negative regulation of apoptotic process;GO:0043666//regulation of phosphoprotein phosphatase activity;GO:0071318//cellular response to ATP
ENSMUST00000103420	14292690	7233836.5	15078260	1520562.75	1568029	91705.6640625	12201595.5	1060099.13802083	-3.52479871550203	4.89254349945434e-13	2.7331527094679e-10	Ighg1	immunoglobulin heavy constant gamma 1 (G1m marker) [Source:MGI Symbol;Acc:MGI:96446]	Environmental Information Processing;Human Diseases;Human Diseases;Environmental Information Processing;Cellular Processes;Organismal Systems;Environmental Information Processing;Human Diseases;Human Diseases;Environmental Information Processing;Human Diseases;Human Diseases;Organismal Systems;Organismal Systems;Human Diseases;Organismal Systems;Human Diseases;Organismal Systems;Human Diseases;Hu…	Signal transduction;Infectious diseases;Infectious diseases;Signal transduction;Transport and catabolism;Immune system;Signal transduction;Cancers;Immune diseases;Signal transduction;Cardiovascular diseases;Infectious diseases;Immune system;Immune system;Cardiovascular diseases;Immune system;Infectious diseases;Immune system;Immune diseases;Infectious diseases;Infectious diseases;Infectious disea…	ko04151//PI3K-Akt signaling pathway;ko05169//Epstein-Barr virus infection;ko05152//Tuberculosis;ko04072//Phospholipase D signaling pathway;ko04145//Phagosome;ko04666//Fc gamma R-mediated phagocytosis;ko04020//Calcium signaling pathway;ko05202//Transcriptional misregulation in cancers;ko05322//Systemic lupus erythematosus;ko04064//NF-kappa B signaling pathway;ko05414//Dilated cardiomyopathy (DCM);…	K06856;K06856;K06856;K06856;K06856;K06856;K06856;K06856;K06856;K06856;K06856;K06856;K06856;K06856;K06856;K06856;K06856;K06856;K06856;K06856;K06856;K06856;K06856;K06856;K06856;K06856;K06856	-	-	-
ENSMUST00000194304	14292690	7233836.5	15078260	1520562.75	1568029	91705.6640625	12201595.5	1060099.13802083	-3.52479871550203	4.89254349945434e-13	2.7331527094679e-10	Ighg1	immunoglobulin heavy constant gamma 1 (G1m marker) [Source:MGI Symbol;Acc:MGI:96446]	Environmental Information Processing;Human Diseases;Human Diseases;Environmental Information Processing;Cellular Processes;Organismal Systems;Environmental Information Processing;Human Diseases;Human Diseases;Environmental Information Processing;Human Diseases;Human Diseases;Organismal Systems;Organismal Systems;Human Diseases;Organismal Systems;Human Diseases;Organismal Systems;Human Diseases;Hu…	Signal transduction;Infectious diseases;Infectious diseases;Signal transduction;Transport and catabolism;Immune system;Signal transduction;Cancers;Immune diseases;Signal transduction;Cardiovascular diseases;Infectious diseases;Immune system;Immune system;Cardiovascular diseases;Immune system;Infectious diseases;Immune system;Immune diseases;Infectious diseases;Infectious diseases;Infectious disea…	ko04151//PI3K-Akt signaling pathway;ko05169//Epstein-Barr virus infection;ko05152//Tuberculosis;ko04072//Phospholipase D signaling pathway;ko04145//Phagosome;ko04666//Fc gamma R-mediated phagocytosis;ko04020//Calcium signaling pathway;ko05202//Transcriptional misregulation in cancers;ko05322//Systemic lupus erythematosus;ko04064//NF-kappa B signaling pathway;ko05414//Dilated cardiomyopathy (DCM);…	K06856;K06856;K06856;K06856;K06856;K06856;K06856;K06856;K06856;K06856;K06856;K06856;K06856;K06856;K06856;K06856;K06856;K06856;K06856;K06856;K06856;K06856;K06856;K06856;K06856;K06856;K06856	GO:0016020//membrane;GO:0016021//integral component of membrane	-	-
ENSMUST00000113607	827137.75	646746.1875	675639.5	601114.5625	377661.90625	409411	716507.8125	462729.15625	-0.630814430111142	7.44078454048189e-13	3.8103017501051e-10	Copg1	coatomer protein complex, subunit gamma 1 [Source:MGI Symbol;Acc:MGI:1858696]	-	-	-	-	GO:0000139//Golgi membrane;GO:0005623//cell;GO:0005737//cytoplasm;GO:0005783//endoplasmic reticulum;GO:0005793//endoplasmic reticulum-Golgi intermediate compartment;GO:0005794//Golgi apparatus;GO:0005829//cytosol;GO:0016020//membrane;GO:0030117//membrane coat;GO:0030126//COPI vesicle coat;GO:0030663//COPI-coated vesicle membrane;GO:0031410//cytoplasmic vesicle	GO:0005198//structural molecule activity	GO:0006886//intracellular protein transport;GO:0006888//ER to Golgi vesicle-mediated transport;GO:0006891//intra-Golgi vesicle-mediated transport;GO:0009306//protein secretion;GO:0015031//protein transport;GO:0016192//vesicle-mediated transport;GO:0051683//establishment of Golgi localization;GO:0072384//organelle transport along microtubule
ENSMUST00000019068	1073596.5	415818.3125	590086.125	433089.375	425343.65625	332526.875	693166.979166667	396986.635416667	-0.804112489805329	1.55439375778304e-12	7.34749972428984e-10	Alox15	arachidonate 15-lipoxygenase [Source:MGI Symbol;Acc:MGI:87997]	Metabolism;Cellular Processes;Organismal Systems;Cellular Processes;Metabolism;Metabolism	Global and overview maps;Cell growth and death;Nervous system;Cell growth and death;Lipid metabolism;Lipid metabolism	ko01100//Metabolic pathways;ko04217//Necroptosis;ko04726//Serotonergic synapse;ko04216//Ferroptosis;ko00590//Arachidonic acid metabolism;ko00591//Linoleic acid metabolism	K00460;K00460;K00460;K00460;K00460;K00460	GO:0005737//cytoplasm;GO:0005811//lipid droplet;GO:0005829//cytosol;GO:0005886//plasma membrane;GO:0016020//membrane;GO:0031234//extrinsic component of cytoplasmic side of plasma membrane	GO:0004052//arachidonate 12-lipoxygenase activity;GO:0005506//iron ion binding;GO:0005515//protein binding;GO:0005546//phosphatidylinositol-4,5-bisphosphate binding;GO:0008289//lipid binding;GO:0016165//linoleate 13S-lipoxygenase activity;GO:0016491//oxidoreductase activity;GO:0016702//oxidoreductase activity, acting on single donors with incorporation of molecular oxygen, incorporation of two at…	GO:0001503//ossification;GO:0002820//negative regulation of adaptive immune response;GO:0006629//lipid metabolic process;GO:0006631//fatty acid metabolic process;GO:0006646//phosphatidylethanolamine biosynthetic process;GO:0010811//positive regulation of cell-substrate adhesion;GO:0019369//arachidonic acid metabolic process;GO:0019372//lipoxygenase pathway;GO:0019395//fatty acid oxidation;GO:0030…
ENSMUST00000085425	2078237.75	1613380.125	2076966.125	1205293.75	789455.6875	835567.5	1922861.33333333	943438.979166667	-1.02725361317131	3.75158141469102e-12	1.64667627094831e-09	Isg15	ISG15 ubiquitin-like modifier [Source:MGI Symbol;Acc:MGI:1855694]	Human Diseases;Human Diseases;Organismal Systems	Infectious diseases;Infectious diseases;Immune system	ko05165//Human papillomavirus infection;ko05169//Epstein-Barr virus infection;ko04622//RIG-I-like receptor signaling pathway	K12159;K12159;K12159	GO:0005576//extracellular region;GO:0005634//nucleus;GO:0005737//cytoplasm	GO:0005178//integrin binding;GO:0005515//protein binding;GO:0031386//protein tag;GO:0031625//ubiquitin protein ligase binding	GO:0007229//integrin-mediated signaling pathway;GO:0009617//response to bacterium;GO:0019941//modification-dependent protein catabolic process;GO:0030501//positive regulation of bone mineralization;GO:0031397//negative regulation of protein ubiquitination;GO:0032020//ISG15-protein conjugation;GO:0032649//regulation of interferon-gamma production;GO:0034340//response to type I interferon;GO:004274…
ENSMUST00000020161	1032542	408764.25	274903.65625	85907.65625	96430.375	48942.39453125	572069.96875	77093.4752604167	-2.89151094180849	1.42899814908264e-11	5.85412908407522e-09	Arg1	arginase, liver [Source:MGI Symbol;Acc:MGI:88070]	Metabolism;Human Diseases;Metabolism;Metabolism;Metabolism	Global and overview maps;Infectious diseases;Global and overview maps;Amino acid metabolism;Amino acid metabolism	ko01100//Metabolic pathways;ko05146//Amoebiasis;ko01230//Biosynthesis of amino acids;ko00330//Arginine and proline metabolism;ko00220//Arginine biosynthesis	K01476;K01476;K01476;K01476;K01476	GO:0005615//extracellular space;GO:0005737//cytoplasm;GO:0005741//mitochondrial outer membrane;GO:0005829//cytosol;GO:0043005//neuron projection;GO:0043025//neuronal cell body	GO:0004053//arginase activity;GO:0016787//hydrolase activity;GO:0016813//hydrolase activity, acting on carbon-nitrogen (but not peptide) bonds, in linear amidines;GO:0030145//manganese ion binding;GO:0042802//identical protein binding;GO:0046872//metal ion binding	GO:0000050//urea cycle;GO:0001889//liver development;GO:0001938//positive regulation of endothelial cell proliferation;GO:0002250//adaptive immune response;GO:0002376//immune system process;GO:0006525//arginine metabolic process;GO:0007565//female pregnancy;GO:0007568//aging;GO:0009611//response to wounding;GO:0009635//response to herbicide;GO:0010042//response to manganese ion;GO:0010043//respon…
ENSMUST00000070968	1021282.4375	859555	1203564	373988.34375	831488	337035.375	1028133.8125	514170.572916667	-0.999709095633173	1.62209369832956e-11	6.22985361014698e-09	Stat1	signal transducer and activator of transcription 1 [Source:MGI Symbol;Acc:MGI:103063]	Human Diseases;Human Diseases;Human Diseases;Human Diseases;Human Diseases;Human Diseases;Organismal Systems;Organismal Systems;Human Diseases;Human Diseases;Human Diseases;Human Diseases;Cellular Processes;Human Diseases;Organismal Systems;Human Diseases;Organismal Systems;Organismal Systems;Organismal Systems;Human Diseases;Human Diseases;Organismal Systems;Organismal Systems;Human Diseases;Env…	Cancers;Infectious diseases;Infectious diseases;Infectious diseases;Infectious diseases;Infectious diseases;Immune system;Immune system;Infectious diseases;Infectious diseases;Infectious diseases;Infectious diseases;Cell growth and death;Infectious diseases;Endocrine system;Infectious diseases;Development;Immune system;Endocrine system;Endocrine and metabolic diseases;Cancers;Immune system;Immune…	ko05200//Pathways in cancer;ko05165//Human papillomavirus infection;ko05169//Epstein-Barr virus infection;ko05152//Tuberculosis;ko05168//Herpes simplex infection;ko05167//Kaposi sarcoma-associated herpesvirus infection;ko04062//Chemokine signaling pathway;ko04621//NOD-like receptor signaling pathway;ko05161//Hepatitis B;ko05164//Influenza A;ko05160//Hepatitis C;ko05162//Measles;ko04217//Necroptos…	K11220;K11220;K11220;K11220;K11220;K11220;K11220;K11220;K11220;K11220;K11220;K11220;K11220;K11220;K11220;K11220;K11220;K11220;K11220;K11220;K11220;K11220;K11220;K11220;K11220;K11220;K11220;K11220	GO:0005634//nucleus;GO:0005737//cytoplasm	GO:0003677//DNA binding;GO:0003700//DNA-binding transcription factor activity	GO:0006355//regulation of transcription, DNA-templated;GO:0007165//signal transduction
ENSMUST00000186057	1021282.4375	859555	1203564	373988.34375	831488	337035.375	1028133.8125	514170.572916667	-0.999709095633173	1.62209369832956e-11	6.22985361014698e-09	Stat1	signal transducer and activator of transcription 1 [Source:MGI Symbol;Acc:MGI:103063]	Human Diseases;Human Diseases;Human Diseases;Human Diseases;Human Diseases;Human Diseases;Organismal Systems;Organismal Systems;Human Diseases;Human Diseases;Human Diseases;Human Diseases;Cellular Processes;Human Diseases;Organismal Systems;Human Diseases;Organismal Systems;Organismal Systems;Organismal Systems;Human Diseases;Human Diseases;Organismal Systems;Organismal Systems;Human Diseases;Env…	Cancers;Infectious diseases;Infectious diseases;Infectious diseases;Infectious diseases;Infectious diseases;Immune system;Immune system;Infectious diseases;Infectious diseases;Infectious diseases;Infectious diseases;Cell growth and death;Infectious diseases;Endocrine system;Infectious diseases;Development;Immune system;Endocrine system;Endocrine and metabolic diseases;Cancers;Immune system;Immune…	ko05200//Pathways in cancer;ko05165//Human papillomavirus infection;ko05169//Epstein-Barr virus infection;ko05152//Tuberculosis;ko05168//Herpes simplex infection;ko05167//Kaposi sarcoma-associated herpesvirus infection;ko04062//Chemokine signaling pathway;ko04621//NOD-like receptor signaling pathway;ko05161//Hepatitis B;ko05164//Influenza A;ko05160//Hepatitis C;ko05162//Measles;ko04217//Necroptos…	K11220;K11220;K11220;K11220;K11220;K11220;K11220;K11220;K11220;K11220;K11220;K11220;K11220;K11220;K11220;K11220;K11220;K11220;K11220;K11220;K11220;K11220;K11220;K11220;K11220;K11220;K11220;K11220	GO:0000790//nuclear chromatin;GO:0005634//nucleus;GO:0005654//nucleoplasm;GO:0005730//nucleolus;GO:0005737//cytoplasm;GO:0005829//cytosol;GO:0032991//protein-containing complex;GO:0048471//perinuclear region of cytoplasm	GO:0000978//RNA polymerase II proximal promoter sequence-specific DNA binding;GO:0000979//RNA polymerase II core promoter sequence-specific DNA binding;GO:0000981//DNA-binding transcription factor activity, RNA polymerase II-specific;GO:0003677//DNA binding;GO:0003690//double-stranded DNA binding;GO:0003700//DNA-binding transcription factor activity;GO:0005164//tumor necrosis factor receptor bind…	GO:0001937//negative regulation of endothelial cell proliferation;GO:0002230//positive regulation of defense response to virus by host;GO:0006355//regulation of transcription, DNA-templated;GO:0007165//signal transduction;GO:0007259//JAK-STAT cascade;GO:0010742//macrophage derived foam cell differentiation;GO:0016525//negative regulation of angiogenesis;GO:0032727//positive regulation of interfer…
ENSMUST00000186857	1021282.4375	859555	1203564	373988.34375	831488	337035.375	1028133.8125	514170.572916667	-0.999709095633173	1.62209369832956e-11	6.22985361014698e-09	Stat1	signal transducer and activator of transcription 1 [Source:MGI Symbol;Acc:MGI:103063]	Human Diseases;Human Diseases;Human Diseases;Human Diseases;Human Diseases;Human Diseases;Organismal Systems;Organismal Systems;Human Diseases;Human Diseases;Human Diseases;Human Diseases;Cellular Processes;Human Diseases;Organismal Systems;Human Diseases;Organismal Systems;Organismal Systems;Organismal Systems;Human Diseases;Human Diseases;Organismal Systems;Organismal Systems;Human Diseases;Env…	Cancers;Infectious diseases;Infectious diseases;Infectious diseases;Infectious diseases;Infectious diseases;Immune system;Immune system;Infectious diseases;Infectious diseases;Infectious diseases;Infectious diseases;Cell growth and death;Infectious diseases;Endocrine system;Infectious diseases;Development;Immune system;Endocrine system;Endocrine and metabolic diseases;Cancers;Immune system;Immune…	ko05200//Pathways in cancer;ko05165//Human papillomavirus infection;ko05169//Epstein-Barr virus infection;ko05152//Tuberculosis;ko05168//Herpes simplex infection;ko05167//Kaposi sarcoma-associated herpesvirus infection;ko04062//Chemokine signaling pathway;ko04621//NOD-like receptor signaling pathway;ko05161//Hepatitis B;ko05164//Influenza A;ko05160//Hepatitis C;ko05162//Measles;ko04217//Necroptos…	K11220;K11220;K11220;K11220;K11220;K11220;K11220;K11220;K11220;K11220;K11220;K11220;K11220;K11220;K11220;K11220;K11220;K11220;K11220;K11220;K11220;K11220;K11220;K11220;K11220;K11220;K11220;K11220	GO:0005634//nucleus;GO:0005737//cytoplasm	GO:0003677//DNA binding;GO:0003700//DNA-binding transcription factor activity	GO:0006355//regulation of transcription, DNA-templated;GO:0007165//signal transduction
ENSMUST00000165147	256146.3125	241396.28125	211389.765625	64791.55078125	130474.703125	94816.5546875	236310.786458333	96694.26953125	-1.28918318517607	3.28484781657835e-11	1.187375872522e-08	Muc5b	mucin 5, subtype B, tracheobronchial [Source:MGI Symbol;Acc:MGI:1921430]	Organismal Systems;Organismal Systems	Immune system;Digestive system	ko04657//IL-17 signaling pathway;ko04970//Salivary secretion	K13908;K13908	GO:0005576//extracellular region;GO:0005615//extracellular space;GO:0043231//intracellular membrane-bounded organelle	GO:0003674//molecular_function;GO:0005515//protein binding	GO:0042742//defense response to bacterium;GO:0043030//regulation of macrophage activation
ENSMUST00000029919	3100578	1257856.5	2407140.25	723747.75	1795871.5	170896.8125	2255191.58333333	896838.6875	-1.33032957965603	3.99396996239478e-11	1.36349696771755e-08	Clca1	chloride channel accessory 1 [Source:MGI Symbol;Acc:MGI:1346342]	Organismal Systems;Organismal Systems	Digestive system;Endocrine system	ko04972//Pancreatic secretion;ko04924//Renin secretion	K05027;K05027	GO:0005576//extracellular region;GO:0005615//extracellular space;GO:0005887//integral component of plasma membrane;GO:0005902//microvillus;GO:0016021//integral component of membrane;GO:0030141//secretory granule;GO:0042589//zymogen granule membrane	GO:0005229//intracellular calcium activated chloride channel activity;GO:0005254//chloride channel activity;GO:0008233//peptidase activity;GO:0008237//metallopeptidase activity;GO:0016787//hydrolase activity;GO:0046872//metal ion binding	GO:0006508//proteolysis;GO:0006811//ion transport;GO:0006816//calcium ion transport;GO:0006821//chloride transport;GO:0071456//cellular response to hypoxia;GO:1902476//chloride transmembrane transport
ENSMUST00000006235	1279582	875994.625	970098.3125	564261.375	808054.3125	419584.5625	1041891.64583333	597300.083333333	-0.802677420512119	4.93079326666227e-11	1.59472234861261e-08	Ctsb	cathepsin B [Source:MGI Symbol;Acc:MGI:88561]	Organismal Systems;Cellular Processes;Cellular Processes;Cellular Processes;Organismal Systems;Organismal Systems	Immune system;Transport and catabolism;Cell growth and death;Transport and catabolism;Immune system;Endocrine system	ko04621//NOD-like receptor signaling pathway;ko04140//Autophagy - animal;ko04210//Apoptosis;ko04142//Lysosome;ko04612//Antigen processing and presentation;ko04924//Renin secretion	K01363;K01363;K01363;K01363;K01363;K01363	GO:0005576//extracellular region;GO:0005615//extracellular space;GO:0005730//nucleolus;GO:0005737//cytoplasm;GO:0005739//mitochondrion;GO:0005764//lysosome;GO:0005886//plasma membrane;GO:0005901//caveola;GO:0009897//external side of plasma membrane;GO:0009986//cell surface;GO:0016020//membrane;GO:0016324//apical plasma membrane;GO:0042383//sarcolemma;GO:0042470//melanosome;GO:0043231//intracellul…	GO:0004175//endopeptidase activity;GO:0004197//cysteine-type endopeptidase activity;GO:0005518//collagen binding;GO:0008233//peptidase activity;GO:0008234//cysteine-type peptidase activity;GO:0016787//hydrolase activity;GO:0030984//kininogen binding;GO:0042277//peptide binding;GO:0043394//proteoglycan binding;GO:0043621//protein self-association;GO:0044877//protein-containing complex binding	GO:0006508//proteolysis;GO:0006590//thyroid hormone generation;GO:0030574//collagen catabolic process;GO:0030855//epithelial cell differentiation;GO:0046697//decidualization;GO:0046718//viral entry into host cell;GO:0050790//regulation of catalytic activity;GO:0051603//proteolysis involved in cellular protein catabolic process;GO:0060548//negative regulation of cell death;GO:0097067//cellular res…
ENSMUST00000031055	1059104.625	1205791.875	838307.625	461654.125	617839.9375	355820.09375	1034401.375	478438.052083333	-1.11239205550207	5.57068079335585e-11	1.71159167375858e-08	Emilin1	elastin microfibril interfacer 1 [Source:MGI Symbol;Acc:MGI:1926189]	-	-	-	-	GO:0005576//extracellular region;GO:0005581//collagen trimer;GO:0005615//extracellular space;GO:0031012//extracellular matrix;GO:0034668//integrin alpha4-beta1 complex;GO:0062023//collagen-containing extracellular matrix;GO:1990971//EMILIN complex	GO:0005515//protein binding;GO:0030023//extracellular matrix constituent conferring elasticity;GO:0042802//identical protein binding;GO:0098640//integrin binding involved in cell-matrix adhesion	GO:0003180//aortic valve morphogenesis;GO:0007155//cell adhesion;GO:0007160//cell-matrix adhesion;GO:0010628//positive regulation of gene expression;GO:0010629//negative regulation of gene expression;GO:0010811//positive regulation of cell-substrate adhesion;GO:0016477//cell migration;GO:0016525//negative regulation of angiogenesis;GO:0030198//extracellular matrix organization;GO:0030512//negativ…
ENSMUST00000016400	841693.3125	844482.25	704547.1875	543850.3125	601187.625	347257.3125	796907.583333333	497431.75	-0.679913831231181	6.3984672824662e-11	1.8723134024169e-08	Ctsz	cathepsin Z [Source:MGI Symbol;Acc:MGI:1891190]	Cellular Processes;Cellular Processes	Cell growth and death;Transport and catabolism	ko04210//Apoptosis;ko04142//Lysosome	K08568;K08568	GO:0005615//extracellular space;GO:0005764//lysosome;GO:0005783//endoplasmic reticulum;GO:0009986//cell surface;GO:0030426//growth cone;GO:0031410//cytoplasmic vesicle;GO:0043231//intracellular membrane-bounded organelle;GO:0062023//collagen-containing extracellular matrix;GO:0099738//cell cortex region	GO:0004180//carboxypeptidase activity;GO:0004197//cysteine-type endopeptidase activity;GO:0008233//peptidase activity;GO:0008234//cysteine-type peptidase activity;GO:0016787//hydrolase activity	GO:0006508//proteolysis;GO:0010757//negative regulation of plasminogen activation;GO:0010977//negative regulation of neuron projection development;GO:0032091//negative regulation of protein binding;GO:0043525//positive regulation of neuron apoptotic process;GO:0051603//proteolysis involved in cellular protein catabolic process;GO:0060441//epithelial tube branching involved in lung morphogenesis;G…
ENSMUST00000037907	226098.53125	206714.78125	298076.625	97568.3828125	121338.5546875	136827.34375	243629.979166667	118578.09375	-1.0388541613394	8.44128547308228e-11	2.35780451054957e-08	Ddx58	DEAD (Asp-Glu-Ala-Asp) box polypeptide 58 [Source:MGI Symbol;Acc:MGI:2442858]	Human Diseases;Human Diseases;Human Diseases;Environmental Information Processing;Human Diseases;Human Diseases;Human Diseases;Organismal Systems;Organismal Systems	Infectious diseases;Infectious diseases;Infectious diseases;Signal transduction;Infectious diseases;Infectious diseases;Infectious diseases;Immune system;Immune system	ko05169//Epstein-Barr virus infection;ko05168//Herpes simplex infection;ko05161//Hepatitis B;ko04064//NF-kappa B signaling pathway;ko05164//Influenza A;ko05160//Hepatitis C;ko05162//Measles;ko04622//RIG-I-like receptor signaling pathway;ko04623//Cytosolic DNA-sensing pathway	K12646;K12646;K12646;K12646;K12646;K12646;K12646;K12646;K12646	GO:0005737//cytoplasm;GO:0005829//cytosol;GO:0005856//cytoskeleton;GO:0005886//plasma membrane;GO:0005923//bicellular tight junction;GO:0015629//actin cytoskeleton;GO:0016020//membrane;GO:0030054//cell junction;GO:0032587//ruffle membrane;GO:0042995//cell projection;GO:1990904//ribonucleoprotein complex	GO:0000166//nucleotide binding;GO:0003677//DNA binding;GO:0003690//double-stranded DNA binding;GO:0003723//RNA binding;GO:0003724//RNA helicase activity;GO:0003725//double-stranded RNA binding;GO:0003727//single-stranded RNA binding;GO:0004386//helicase activity;GO:0005515//protein binding;GO:0005524//ATP binding;GO:0008270//zinc ion binding;GO:0016787//hydrolase activity;GO:0031625//ubiquitin pr…	GO:0002230//positive regulation of defense response to virus by host;GO:0002376//immune system process;GO:0002735//positive regulation of myeloid dendritic cell cytokine production;GO:0009597//detection of virus;GO:0009615//response to virus;GO:0010628//positive regulation of gene expression;GO:0030334//regulation of cell migration;GO:0032725//positive regulation of granulocyte macrophage colony-…
ENSMUST00000079132	1605376	984048.8125	1784931.875	215270.578125	199361.296875	179462.578125	1458118.89583333	198031.484375	-2.88030663962792	4.1426813994317e-10	1.06069904997949e-07	Chia1	chitinase, acidic 1 [Source:MGI Symbol;Acc:MGI:1932052]	Metabolism;Metabolism	Global and overview maps;Carbohydrate metabolism	ko01100//Metabolic pathways;ko00520//Amino sugar and nucleotide sugar metabolism	K01183;K01183	GO:0005576//extracellular region;GO:0005615//extracellular space;GO:0005737//cytoplasm	GO:0004553//hydrolase activity, hydrolyzing O-glycosyl compounds;GO:0004568//chitinase activity;GO:0008061//chitin binding;GO:0016787//hydrolase activity;GO:0016798//hydrolase activity, acting on glycosyl bonds;GO:0019900//kinase binding	GO:0000272//polysaccharide catabolic process;GO:0001878//response to yeast;GO:0002376//immune system process;GO:0002532//production of molecular mediator involved in inflammatory response;GO:0005975//carbohydrate metabolic process;GO:0006030//chitin metabolic process;GO:0006032//chitin catabolic process;GO:0006915//apoptotic process;GO:0006954//inflammatory response;GO:0006955//immune response;GO…
ENSMUST00000112132	4881518.5	5829792.5	4903173	8802126	10174271	9721769	5204828	9566055.33333333	0.878073647724985	4.12739659513046e-09	8.45428402569222e-07	Pzp	PZP, alpha-2-macroglobulin like [Source:MGI Symbol;Acc:MGI:87854]	-	-	-	-	GO:0005576//extracellular region;GO:0005615//extracellular space;GO:0062023//collagen-containing extracellular matrix	GO:0002020//protease binding;GO:0004866//endopeptidase inhibitor activity;GO:0004867//serine-type endopeptidase inhibitor activity;GO:0030414//peptidase inhibitor activity;GO:0044877//protein-containing complex binding;GO:0048403//brain-derived neurotrophic factor binding;GO:0048406//nerve growth factor binding	GO:0007566//embryo implantation;GO:0010466//negative regulation of peptidase activity;GO:0010951//negative regulation of endopeptidase activity
ENSMUST00000069036	711417.125	688820.5625	835587.5	384343.28125	574149.9375	366607.8125	745275.0625	441700.34375	-0.75470503159123	5.42192478432650e-09	1.0411789937402e-06	Manf	mesencephalic astrocyte-derived neurotrophic factor [Source:MGI Symbol;Acc:MGI:1922090]	-	-	-	-	GO:0005575//cellular_component	GO:0003674//molecular_function	-
ENSMUST00000159283	711417.125	688820.5625	835587.5	384343.28125	574149.9375	366607.8125	745275.0625	441700.34375	-0.75470503159123	5.42192478432650e-09	1.0411789937402e-06	Manf	mesencephalic astrocyte-derived neurotrophic factor [Source:MGI Symbol;Acc:MGI:1922090]	-	-	-	-	GO:0005615//extracellular space;GO:0005783//endoplasmic reticulum;GO:0048471//perinuclear region of cytoplasm	-	-
ENSMUST00000102824	279204.5625	215658.125	356477.625	54358.3984375	33907.2578125	32186.83203125	283780.104166667	40150.8294270833	-2.82127174949992	9.66933576885542e-09	1.74759024410637e-06	Ifit1	interferon-induced protein with tetratricopeptide repeats 1 [Source:MGI Symbol;Acc:MGI:99450]	Human Diseases	Infectious diseases	ko05160//Hepatitis C	K14217	GO:0005737//cytoplasm;GO:0005829//cytosol	GO:0003723//RNA binding;GO:0005515//protein binding	GO:0002376//immune system process;GO:0009615//response to virus;GO:0009617//response to bacterium;GO:0035457//cellular response to interferon-alpha;GO:0035458//cellular response to interferon-beta;GO:0045087//innate immune response;GO:0051607//defense response to virus
ENSMUST00000028222	7705002	6071160	6827104.5	4458819	4323706	3850541.5	6867755.5	4211022.16666667	-0.705668208829493	1.21356793748796e-08	2.13067856453244e-06	Hspa5	heat shock protein 5 [Source:MGI Symbol;Acc:MGI:95835]	Genetic Information Processing;Organismal Systems;Human Diseases;Genetic Information Processing	Folding, sorting and degradation;Endocrine system;Neurodegenerative diseases;Folding, sorting and degradation	ko04141//Protein processing in endoplasmic reticulum;ko04918//Thyroid hormone synthesis;ko05020//Prion diseases;ko03060//Protein export	K09490;K09490;K09490;K09490	GO:0005576//extracellular region;GO:0005634//nucleus;GO:0005737//cytoplasm;GO:0005739//mitochondrion;GO:0005783//endoplasmic reticulum;GO:0005788//endoplasmic reticulum lumen;GO:0005789//endoplasmic reticulum membrane;GO:0005790//smooth endoplasmic reticulum;GO:0005793//endoplasmic reticulum-Golgi intermediate compartment;GO:0005829//cytosol;GO:0005886//plasma membrane;GO:0008180//COP9 signalosom…	GO:0000166//nucleotide binding;GO:0005515//protein binding;GO:0005524//ATP binding;GO:0016787//hydrolase activity;GO:0016887//ATPase activity;GO:0019899//enzyme binding;GO:0019904//protein domain specific binding;GO:0031072//heat shock protein binding;GO:0031625//ubiquitin protein ligase binding;GO:0042623//ATPase activity, coupled;GO:0043022//ribosome binding;GO:0044183//protein binding involved…	GO:0001554//luteolysis;GO:0006983//ER overload response;GO:0006986//response to unfolded protein;GO:0009314//response to radiation;GO:0010976//positive regulation of neuron projection development;GO:0021589//cerebellum structural organization;GO:0021680//cerebellar Purkinje cell layer development;GO:0030182//neuron differentiation;GO:0030335//positive regulation of cell migration;GO:0030433//ubiq…
ENSMUST00000100171	7705002	6071160	6827104.5	4458819	4323706	3850541.5	6867755.5	4211022.16666667	-0.705668208829493	1.21356793748796e-08	2.13067856453244e-06	Hspa5	heat shock protein 5 [Source:MGI Symbol;Acc:MGI:95835]	Genetic Information Processing;Organismal Systems;Human Diseases;Genetic Information Processing	Folding, sorting and degradation;Endocrine system;Neurodegenerative diseases;Folding, sorting and degradation	ko04141//Protein processing in endoplasmic reticulum;ko04918//Thyroid hormone synthesis;ko05020//Prion diseases;ko03060//Protein export	K09490;K09490;K09490;K09490	GO:0005576//extracellular region;GO:0005634//nucleus;GO:0005737//cytoplasm;GO:0005739//mitochondrion;GO:0005783//endoplasmic reticulum;GO:0005788//endoplasmic reticulum lumen;GO:0005789//endoplasmic reticulum membrane;GO:0005790//smooth endoplasmic reticulum;GO:0005793//endoplasmic reticulum-Golgi intermediate compartment;GO:0005829//cytosol;GO:0005886//plasma membrane;GO:0008180//COP9 signalosom…	GO:0000166//nucleotide binding;GO:0005515//protein binding;GO:0005524//ATP binding;GO:0016787//hydrolase activity;GO:0016887//ATPase activity;GO:0019899//enzyme binding;GO:0019904//protein domain specific binding;GO:0031072//heat shock protein binding;GO:0031625//ubiquitin protein ligase binding;GO:0042623//ATPase activity, coupled;GO:0043022//ribosome binding;GO:0044183//protein binding involved…	GO:0006983//ER overload response;GO:0006986//response to unfolded protein;GO:0010976//positive regulation of neuron projection development;GO:0021589//cerebellum structural organization;GO:0021680//cerebellar Purkinje cell layer development;GO:0030335//positive regulation of cell migration;GO:0030433//ubiquitin-dependent ERAD pathway;GO:0030512//negative regulation of transforming growth factor b…
ENSMUST00000082060	806177.5625	649505.9375	1057645.875	187401.84375	180671.90625	438048.125	837776.458333333	268707.291666667	-1.64052987379584	1.38291664494312e-08	2.36056188421541e-06	Chil1	chitinase-like 1 [Source:MGI Symbol;Acc:MGI:1340899]	-	-	-	-	GO:0005576//extracellular region;GO:0005615//extracellular space;GO:0005737//cytoplasm;GO:0005783//endoplasmic reticulum	GO:0004568//chitinase activity;GO:0005515//protein binding;GO:0008061//chitin binding	GO:0005975//carbohydrate metabolic process;GO:0006032//chitin catabolic process;GO:0006915//apoptotic process;GO:0006954//inflammatory response;GO:0007250//activation of NF-kappaB-inducing kinase activity;GO:0009612//response to mechanical stimulus;GO:0010800//positive regulation of peptidyl-threonine phosphorylation;GO:0030324//lung development;GO:0034612//response to tumor necrosis factor;GO:00…
ENSMUST00000153856	806177.5625	649505.9375	1057645.875	187401.84375	180671.90625	438048.125	837776.458333333	268707.291666667	-1.64052987379584	1.38291664494312e-08	2.36056188421541e-06	Chil1	chitinase-like 1 [Source:MGI Symbol;Acc:MGI:1340899]	-	-	-	-	GO:0005576//extracellular region;GO:0005615//extracellular space;GO:0005737//cytoplasm;GO:0005783//endoplasmic reticulum	GO:0004568//chitinase activity;GO:0005515//protein binding;GO:0008061//chitin binding	GO:0005975//carbohydrate metabolic process;GO:0006032//chitin catabolic process;GO:0006915//apoptotic process;GO:0006954//inflammatory response;GO:0007250//activation of NF-kappaB-inducing kinase activity;GO:0009612//response to mechanical stimulus;GO:0010800//positive regulation of peptidyl-threonine phosphorylation;GO:0030324//lung development;GO:0034612//response to tumor necrosis factor;GO:00…
ENSMUST00000156873	806177.5625	649505.9375	1057645.875	187401.84375	180671.90625	438048.125	837776.458333333	268707.291666667	-1.64052987379584	1.38291664494312e-08	2.36056188421541e-06	Chil1	chitinase-like 1 [Source:MGI Symbol;Acc:MGI:1340899]	-	-	-	-	GO:0005576//extracellular region;GO:0005615//extracellular space;GO:0005737//cytoplasm;GO:0005783//endoplasmic reticulum	GO:0004568//chitinase activity;GO:0005515//protein binding;GO:0008061//chitin binding	GO:0005975//carbohydrate metabolic process;GO:0006032//chitin catabolic process;GO:0006915//apoptotic process;GO:0006954//inflammatory response;GO:0007250//activation of NF-kappaB-inducing kinase activity;GO:0009612//response to mechanical stimulus;GO:0010800//positive regulation of peptidyl-threonine phosphorylation;GO:0030324//lung development;GO:0034612//response to tumor necrosis factor;GO:00…
ENSMUST00000027817	525259.125	962310.1875	587313.25	1257976.25	915824.375	1050057	691627.520833333	1074619.20833333	0.635758348807875	1.69066451578649e-08	2.73398248671262e-06	Spta1	spectrin alpha, erythrocytic 1 [Source:MGI Symbol;Acc:MGI:98385]	Cellular Processes	Cell growth and death	ko04210//Apoptosis	K06114	GO:0005737//cytoplasm;GO:0005856//cytoskeleton;GO:0005938//cell cortex;GO:0008091//spectrin;GO:0009898//cytoplasmic side of plasma membrane;GO:0014731//spectrin-associated cytoskeleton;GO:0016020//membrane;GO:0030424//axon;GO:0030863//cortical cytoskeleton;GO:0032437//cuticular plate	GO:0003779//actin binding;GO:0005509//calcium ion binding;GO:0005515//protein binding;GO:0046872//metal ion binding	GO:0002260//lymphocyte homeostasis;GO:0006779//porphyrin-containing compound biosynthetic process;GO:0007009//plasma membrane organization;GO:0008360//regulation of cell shape;GO:0030036//actin cytoskeleton organization;GO:0030097//hemopoiesis;GO:0032092//positive regulation of protein binding;GO:0042102//positive regulation of T cell proliferation;GO:0051693//actin filament capping
ENSMUST00000082219	9245608	7075267	7343997.5	3766365.75	2156096.5	241226.40625	7888290.83333333	2054562.88541667	-1.94088125466975	2.77828790239743e-08	4.37758440005954e-06	Chil4	chitinase-like 4 [Source:MGI Symbol;Acc:MGI:1341098]	-	-	-	-	GO:0005576//extracellular region;GO:0005737//cytoplasm	GO:0004568//chitinase activity;GO:0008061//chitin binding	GO:0005975//carbohydrate metabolic process;GO:0006032//chitin catabolic process;GO:0006954//inflammatory response
ENSMUST00000002663	338727.1875	451565.4375	470766.9375	990489.1875	734218.9375	1401875.5	420353.1875	1042194.54166667	1.30995068592831	6.96501186126892e-08	1.04390238749994e-05	Pon1	paraoxonase 1 [Source:MGI Symbol;Acc:MGI:103295]	-	-	-	-	GO:0005576//extracellular region;GO:0005615//extracellular space;GO:0034364//high-density lipoprotein particle;GO:0034366//spherical high-density lipoprotein particle;GO:0043231//intracellular membrane-bounded organelle	GO:0004063//aryldialkylphosphatase activity;GO:0004064//arylesterase activity;GO:0005509//calcium ion binding;GO:0005543//phospholipid binding;GO:0008035//high-density lipoprotein particle binding;GO:0016787//hydrolase activity;GO:0042803//protein homodimerization activity;GO:0046872//metal ion binding;GO:0102007//acyl-L-homoserine-lactone lactonohydrolase activity	GO:0006629//lipid metabolic process;GO:0008015//blood circulation;GO:0008203//cholesterol metabolic process;GO:0009636//response to toxic substance;GO:0010875//positive regulation of cholesterol efflux;GO:0016311//dephosphorylation;GO:0019439//aromatic compound catabolic process;GO:0031667//response to nutrient levels;GO:0032411//positive regulation of transporter activity;GO:0046395//carboxylic …
ENSMUST00000178282	6516625.5	3017785.5	4407276.5	454649.78125	1443090	213531.765625	4647229.16666667	703757.182291667	-2.72322114355215	7.66261144090658e-08	1.12111303105645e-05	Igha	immunoglobulin heavy constant alpha [Source:MGI Symbol;Acc:MGI:96444]	Environmental Information Processing;Human Diseases;Human Diseases;Environmental Information Processing;Cellular Processes;Organismal Systems;Environmental Information Processing;Human Diseases;Human Diseases;Environmental Information Processing;Human Diseases;Human Diseases;Organismal Systems;Organismal Systems;Human Diseases;Organismal Systems;Human Diseases;Organismal Systems;Human Diseases;Hu…	Signal transduction;Infectious diseases;Infectious diseases;Signal transduction;Transport and catabolism;Immune system;Signal transduction;Cancers;Immune diseases;Signal transduction;Cardiovascular diseases;Infectious diseases;Immune system;Immune system;Cardiovascular diseases;Immune system;Infectious diseases;Immune system;Immune diseases;Infectious diseases;Infectious diseases;Infectious disea…	ko04151//PI3K-Akt signaling pathway;ko05169//Epstein-Barr virus infection;ko05152//Tuberculosis;ko04072//Phospholipase D signaling pathway;ko04145//Phagosome;ko04666//Fc gamma R-mediated phagocytosis;ko04020//Calcium signaling pathway;ko05202//Transcriptional misregulation in cancers;ko05322//Systemic lupus erythematosus;ko04064//NF-kappa B signaling pathway;ko05414//Dilated cardiomyopathy (DCM);…	K06856;K06856;K06856;K06856;K06856;K06856;K06856;K06856;K06856;K06856;K06856;K06856;K06856;K06856;K06856;K06856;K06856;K06856;K06856;K06856;K06856;K06856;K06856;K06856;K06856;K06856;K06856	GO:0009897//external side of plasma membrane;GO:0042571//immunoglobulin complex, circulating	GO:0003823//antigen binding;GO:0034987//immunoglobulin receptor binding	GO:0002385//mucosal immune response;GO:0002455//humoral immune response mediated by circulating immunoglobulin;GO:0006910//phagocytosis, recognition;GO:0006911//phagocytosis, engulfment;GO:0006958//complement activation, classical pathway;GO:0016064//immunoglobulin mediated immune response;GO:0042742//defense response to bacterium;GO:0045087//innate immune response;GO:0050853//B cell receptor sig…
ENSMUST00000194738	6516625.5	3017785.5	4407276.5	454649.78125	1443090	213531.765625	4647229.16666667	703757.182291667	-2.72322114355215	7.66261144090658e-08	1.12111303105645e-05	Igha	immunoglobulin heavy constant alpha [Source:MGI Symbol;Acc:MGI:96444]	Environmental Information Processing;Human Diseases;Human Diseases;Environmental Information Processing;Cellular Processes;Organismal Systems;Environmental Information Processing;Human Diseases;Human Diseases;Environmental Information Processing;Human Diseases;Human Diseases;Organismal Systems;Organismal Systems;Human Diseases;Organismal Systems;Human Diseases;Organismal Systems;Human Diseases;Hu…	Signal transduction;Infectious diseases;Infectious diseases;Signal transduction;Transport and catabolism;Immune system;Signal transduction;Cancers;Immune diseases;Signal transduction;Cardiovascular diseases;Infectious diseases;Immune system;Immune system;Cardiovascular diseases;Immune system;Infectious diseases;Immune system;Immune diseases;Infectious diseases;Infectious diseases;Infectious disea…	ko04151//PI3K-Akt signaling pathway;ko05169//Epstein-Barr virus infection;ko05152//Tuberculosis;ko04072//Phospholipase D signaling pathway;ko04145//Phagosome;ko04666//Fc gamma R-mediated phagocytosis;ko04020//Calcium signaling pathway;ko05202//Transcriptional misregulation in cancers;ko05322//Systemic lupus erythematosus;ko04064//NF-kappa B signaling pathway;ko05414//Dilated cardiomyopathy (DCM);…	K06856;K06856;K06856;K06856;K06856;K06856;K06856;K06856;K06856;K06856;K06856;K06856;K06856;K06856;K06856;K06856;K06856;K06856;K06856;K06856;K06856;K06856;K06856;K06856;K06856;K06856;K06856	GO:0009897//external side of plasma membrane;GO:0042571//immunoglobulin complex, circulating	GO:0003823//antigen binding;GO:0034987//immunoglobulin receptor binding	GO:0002385//mucosal immune response;GO:0002455//humoral immune response mediated by circulating immunoglobulin;GO:0006910//phagocytosis, recognition;GO:0006911//phagocytosis, engulfment;GO:0006958//complement activation, classical pathway;GO:0016064//immunoglobulin mediated immune response;GO:0042742//defense response to bacterium;GO:0045087//innate immune response;GO:0050853//B cell receptor sig…
ENSMUST00000003459	217867.59375	172551.890625	230524.390625	101285.1015625	128308.125	83655.4765625	206981.291666667	104416.234375	-0.987154337366978	8.98703846293144e-08	1.25512162169804e-05	Myo1g	myosin IG [Source:MGI Symbol;Acc:MGI:1927091]	Human Diseases	Infectious diseases	ko05130//Pathogenic Escherichia coli infection	K10356	GO:0001891//phagocytic cup;GO:0005623//cell;GO:0005737//cytoplasm;GO:0005886//plasma membrane;GO:0005902//microvillus;GO:0015629//actin cytoskeleton;GO:0016020//membrane;GO:0016459//myosin complex;GO:0030027//lamellipodium;GO:0030175//filopodium;GO:0031256//leading edge membrane;GO:0031982//vesicle;GO:0042995//cell projection	GO:0000146//microfilament motor activity;GO:0000166//nucleotide binding;GO:0003774//motor activity;GO:0003779//actin binding;GO:0005516//calmodulin binding;GO:0005524//ATP binding;GO:0005546//phosphatidylinositol-4,5-bisphosphate binding;GO:0005547//phosphatidylinositol-3,4,5-trisphosphate binding;GO:0008289//lipid binding;GO:0030898//actin-dependent ATPase activity;GO:0043325//phosphatidylinosit…	GO:0002250//adaptive immune response;GO:0002376//immune system process;GO:0002456//T cell mediated immunity;GO:0006887//exocytosis;GO:0006909//phagocytosis;GO:0007015//actin filament organization;GO:0030050//vesicle transport along actin filament;GO:0031589//cell-substrate adhesion;GO:0038096//Fc-gamma receptor signaling pathway involved in phagocytosis;GO:0071976//cell gliding;GO:0120117//T cell…
ENSMUST00000025161	878326.3125	794795.875	1032191.8125	282963.25	791284.4375	239074.484375	901771.333333333	437774.057291667	-1.04257518623293	1.02042850383575e-07	1.3631593817545e-05	Tapbp	TAP binding protein [Source:MGI Symbol;Acc:MGI:1201689]	Human Diseases;Human Diseases;Human Diseases;Human Diseases;Organismal Systems	Infectious diseases;Infectious disease: viral;Infectious diseases;Infectious diseases;Immune system	ko05169//Epstein-Barr virus infection;ko05170//Human immunodeficiency virus 1 infection;ko05163//Human cytomegalovirus infection;ko05168//Herpes simplex infection;ko04612//Antigen processing and presentation	K08058;K08058;K08058;K08058;K08058	GO:0016020//membrane;GO:0016021//integral component of membrane;GO:0042824//MHC class I peptide loading complex	GO:0062061//TAP complex binding	GO:0002397//MHC class I protein complex assembly;GO:0019885//antigen processing and presentation of endogenous peptide antigen via MHC class I;GO:0065003//protein-containing complex assembly
ENSMUST00000234247	878326.3125	794795.875	1032191.8125	282963.25	791284.4375	239074.484375	901771.333333333	437774.057291667	-1.04257518623293	1.02042850383575e-07	1.3631593817545e-05	Tapbp	TAP binding protein [Source:MGI Symbol;Acc:MGI:1201689]	Human Diseases;Human Diseases;Human Diseases;Human Diseases;Organismal Systems	Infectious diseases;Infectious disease: viral;Infectious diseases;Infectious diseases;Immune system	ko05169//Epstein-Barr virus infection;ko05170//Human immunodeficiency virus 1 infection;ko05163//Human cytomegalovirus infection;ko05168//Herpes simplex infection;ko04612//Antigen processing and presentation	K08058;K08058;K08058;K08058;K08058	GO:0000139//Golgi membrane;GO:0005783//endoplasmic reticulum;GO:0005789//endoplasmic reticulum membrane;GO:0005887//integral component of plasma membrane;GO:0016020//membrane;GO:0016021//integral component of membrane;GO:0030670//phagocytic vesicle membrane;GO:0042824//MHC class I peptide loading complex	GO:0005515//protein binding;GO:0046978//TAP1 binding;GO:0046979//TAP2 binding;GO:0062061//TAP complex binding	GO:0002398//MHC class Ib protein complex assembly;GO:0002479//antigen processing and presentation of exogenous peptide antigen via MHC class I, TAP-dependent;GO:0006952//defense response;GO:0010468//regulation of gene expression;GO:0019885//antigen processing and presentation of endogenous peptide antigen via MHC class I;GO:0050823//peptide antigen stabilization;GO:0061635//regulation of protein …
ENSMUST00000045730	772917.25	1217268.375	1324252	1472170.875	1789515	2148408.25	1104812.54166667	1803364.70833333	0.706889591546447	1.29499605462266e-07	1.69313845865027e-05	Akap12	A kinase (PRKA) anchor protein (gravin) 12 [Source:MGI Symbol;Acc:MGI:1932576]	-	-	-	-	GO:0005737//cytoplasm;GO:0005829//cytosol;GO:0005856//cytoskeleton;GO:0005886//plasma membrane;GO:0016020//membrane;GO:0043025//neuronal cell body;GO:0098685//Schaffer collateral - CA1 synapse	GO:0005516//calmodulin binding;GO:0008179//adenylate cyclase binding;GO:0016301//kinase activity;GO:0030159//receptor signaling complex scaffold activity;GO:0051018//protein kinase A binding	GO:0006605//protein targeting;GO:0007165//signal transduction;GO:0007193//adenylate cyclase-inhibiting G protein-coupled receptor signaling pathway;GO:0010738//regulation of protein kinase A signaling;GO:0010739//positive regulation of protein kinase A signaling;GO:0016310//phosphorylation;GO:0032496//response to lipopolysaccharide;GO:0035733//hepatic stellate cell activation;GO:0042535//positive…
ENSMUST00000034586	274076.40625	375170.6875	376954	630370.125	755081.1875	1343832	342067.03125	909761.104166667	1.41120869264331	1.81192577960463e-07	2.27230283993274e-05	Apoc3	apolipoprotein C-III [Source:MGI Symbol;Acc:MGI:88055]	Organismal Systems;Organismal Systems	Endocrine system;Digestive system	ko03320//PPAR signaling pathway;ko04979//Cholesterol metabolism	K08759;K08759	GO:0005576//extracellular region	GO:0008289//lipid binding	GO:0006869//lipid transport;GO:0042157//lipoprotein metabolic process
ENSMUST00000118649	274076.40625	375170.6875	376954	630370.125	755081.1875	1343832	342067.03125	909761.104166667	1.41120869264331	1.81192577960463e-07	2.27230283993274e-05	Apoc3	apolipoprotein C-III [Source:MGI Symbol;Acc:MGI:88055]	Organismal Systems;Organismal Systems	Endocrine system;Digestive system	ko03320//PPAR signaling pathway;ko04979//Cholesterol metabolism	K08759;K08759	GO:0005576//extracellular region	GO:0008289//lipid binding	GO:0006869//lipid transport;GO:0042157//lipoprotein metabolic process
ENSMUST00000121916	274076.40625	375170.6875	376954	630370.125	755081.1875	1343832	342067.03125	909761.104166667	1.41120869264331	1.81192577960463e-07	2.27230283993274e-05	Apoc3	apolipoprotein C-III [Source:MGI Symbol;Acc:MGI:88055]	Organismal Systems;Organismal Systems	Endocrine system;Digestive system	ko03320//PPAR signaling pathway;ko04979//Cholesterol metabolism	K08759;K08759	GO:0005576//extracellular region	GO:0008289//lipid binding	GO:0006869//lipid transport;GO:0042157//lipoprotein metabolic process
ENSMUST00000124830	128572.96875	160115.640625	210680.0625	252740.03125	299147.8125	284535.75	166456.223958333	278807.864583333	0.744128441930367	1.8800640350131e-07	2.3105986990311e-05	Dsp	desmoplakin [Source:MGI Symbol;Acc:MGI:109611]	Human Diseases	Cardiovascular diseases	ko05412//Arrhythmogenic right ventricular cardiomyopathy (ARVC)	K10381	GO:0001533//cornified envelope;GO:0005737//cytoplasm;GO:0005856//cytoskeleton;GO:0005882//intermediate filament;GO:0005886//plasma membrane;GO:0005911//cell-cell junction;GO:0005916//fascia adherens;GO:0014704//intercalated disc;GO:0016020//membrane;GO:0016323//basolateral plasma membrane;GO:0030054//cell junction;GO:0030057//desmosome	GO:0005080//protein kinase C binding;GO:0005198//structural molecule activity;GO:0005515//protein binding;GO:0050839//cell adhesion molecule binding;GO:0097110//scaffold protein binding	GO:0002934//desmosome organization;GO:0003223//ventricular compact myocardium morphogenesis;GO:0018149//peptide cross-linking;GO:0030216//keratinocyte differentiation;GO:0034332//adherens junction organization;GO:0042060//wound healing;GO:0043588//skin development;GO:0045104//intermediate filament cytoskeleton organization;GO:0045109//intermediate filament organization;GO:0086073//bundle of His c…
ENSMUST00000000299	600985.6875	350956.53125	370489.15625	226546.859375	247765	185829.125	440810.458333333	220046.994791667	-1.00234678379237	2.14274142434515e-07	2.58179334364724e-05	Itgb2	integrin beta 2 [Source:MGI Symbol;Acc:MGI:96611]	Human Diseases;Cellular Processes;Environmental Information Processing;Cellular Processes;Human Diseases;Human Diseases;Organismal Systems;Organismal Systems;Human Diseases;Human Diseases;Environmental Information Processing;Environmental Information Processing;Human Diseases;Human Diseases;Organismal Systems;Human Diseases;Human Diseases;Human Diseases	Infectious diseases;Cell motility;Signal transduction;Transport and catabolism;Infectious diseases;Infectious diseases;Immune system;Immune system;Cardiovascular diseases;Infectious diseases;Signaling molecules and interaction;Signal transduction;Immune diseases;Infectious diseases;Immune system;Infectious diseases;Infectious diseases;Infectious diseases	ko05152//Tuberculosis;ko04810//Regulation of actin cytoskeleton;ko04015//Rap1 signaling pathway;ko04145//Phagosome;ko05166//HTLV-I infection;ko05146//Amoebiasis;ko04650//Natural killer cell mediated cytotoxicity;ko04670//Leukocyte transendothelial migration;ko05416//Viral myocarditis;ko05140//Leishmaniasis;ko04514//Cell adhesion molecules (CAMs);ko04390//Hippo signaling pathway;ko05323//Rheumatoi…	K06464;K06464;K06464;K06464;K06464;K06464;K06464;K06464;K06464;K06464;K06464;K06464;K06464;K06464;K06464;K06464;K06464;K06464	GO:0005886//plasma membrane;GO:0008305//integrin complex;GO:0009986//cell surface;GO:0016020//membrane;GO:0016021//integral component of membrane	GO:0038023//signaling receptor activity;GO:0044877//protein-containing complex binding;GO:0050839//cell adhesion molecule binding	GO:0002523//leukocyte migration involved in inflammatory response;GO:0007155//cell adhesion;GO:0007159//leukocyte cell-cell adhesion;GO:0007160//cell-matrix adhesion;GO:0007229//integrin-mediated signaling pathway;GO:0007568//aging;GO:0030101//natural killer cell activation;GO:0043542//endothelial cell migration;GO:0045123//cellular extravasation;GO:0045429//positive regulation of nitric oxide bi…
ENSMUST00000017841	852549.375	340826	915551.5	1403585.875	3519400.75	1271868	702975.625	2064951.54166667	1.55456135501446	5.50769830837319e-07	6.1536011099915e-05	Ada	adenosine deaminase [Source:MGI Symbol;Acc:MGI:87916]	Metabolism;Metabolism;Human Diseases	Global and overview maps;Nucleotide metabolism;Immune diseases	ko01100//Metabolic pathways;ko00230//Purine metabolism;ko05340//Primary immunodeficiency	K01488;K01488;K01488	GO:0005615//extracellular space;GO:0005737//cytoplasm;GO:0005764//lysosome;GO:0005829//cytosol;GO:0005886//plasma membrane;GO:0009897//external side of plasma membrane;GO:0009986//cell surface;GO:0016020//membrane;GO:0030054//cell junction;GO:0031410//cytoplasmic vesicle;GO:0032839//dendrite cytoplasm;GO:0043025//neuronal cell body;GO:0060205//cytoplasmic vesicle lumen	GO:0001883//purine nucleoside binding;GO:0004000//adenosine deaminase activity;GO:0008270//zinc ion binding;GO:0016787//hydrolase activity;GO:0019239//deaminase activity;GO:0046872//metal ion binding	GO:0001666//response to hypoxia;GO:0001701//in utero embryonic development;GO:0001821//histamine secretion;GO:0001829//trophectodermal cell differentiation;GO:0001889//liver development;GO:0001890//placenta development;GO:0002314//germinal center B cell differentiation;GO:0002636//positive regulation of germinal center formation;GO:0002686//negative regulation of leukocyte migration;GO:0002906//n…
ENSMUST00000034562	755839.625	736742.3125	645566.25	1154125.375	1251523.125	1048303	712716.0625	1151317.16666667	0.691885980225058	7.83315915135818e-07	8.59549339019571e-05	Cryab	crystallin, alpha B [Source:MGI Symbol;Acc:MGI:88516]	Genetic Information Processing;Organismal Systems	Folding, sorting and degradation;Aging	ko04141//Protein processing in endoplasmic reticulum;ko04213//Longevity regulating pathway - multiple species	K09542;K09542	GO:0005634//nucleus;GO:0005737//cytoplasm;GO:0005739//mitochondrion;GO:0005794//Golgi apparatus;GO:0005829//cytosol;GO:0005886//plasma membrane;GO:0009986//cell surface;GO:0014069//postsynaptic density;GO:0015630//microtubule cytoskeleton;GO:0030018//Z disc;GO:0030424//axon;GO:0031430//M band;GO:0031674//I band;GO:0032432//actin filament bundle;GO:0032991//protein-containing complex;GO:0043197//d…	GO:0001540//amyloid-beta binding;GO:0005198//structural molecule activity;GO:0005212//structural constituent of eye lens;GO:0005515//protein binding;GO:0008017//microtubule binding;GO:0008092//cytoskeletal protein binding;GO:0042802//identical protein binding;GO:0042803//protein homodimerization activity;GO:0044877//protein-containing complex binding;GO:0046872//metal ion binding;GO:0051082//unfo…	GO:0001666//response to hypoxia;GO:0002088//lens development in camera-type eye;GO:0006457//protein folding;GO:0007021//tubulin complex assembly;GO:0007517//muscle organ development;GO:0010629//negative regulation of gene expression;GO:0010941//regulation of cell death;GO:0030308//negative regulation of cell growth;GO:0031109//microtubule polymerization or depolymerization;GO:0031333//negative re…
ENSMUST00000214962	755839.625	736742.3125	645566.25	1154125.375	1251523.125	1048303	712716.0625	1151317.16666667	0.691885980225058	7.83315915135818e-07	8.59549339019571e-05	Cryab	crystallin, alpha B [Source:MGI Symbol;Acc:MGI:88516]	Genetic Information Processing;Organismal Systems	Folding, sorting and degradation;Aging	ko04141//Protein processing in endoplasmic reticulum;ko04213//Longevity regulating pathway - multiple species	K09542;K09542	GO:0005634//nucleus;GO:0005737//cytoplasm;GO:0005739//mitochondrion;GO:0005794//Golgi apparatus;GO:0005829//cytosol;GO:0005886//plasma membrane;GO:0009986//cell surface;GO:0014069//postsynaptic density;GO:0015630//microtubule cytoskeleton;GO:0030018//Z disc;GO:0030424//axon;GO:0031430//M band;GO:0031674//I band;GO:0032432//actin filament bundle;GO:0032991//protein-containing complex;GO:0043197//d…	GO:0001540//amyloid-beta binding;GO:0005198//structural molecule activity;GO:0005212//structural constituent of eye lens;GO:0005515//protein binding;GO:0008017//microtubule binding;GO:0008092//cytoskeletal protein binding;GO:0042802//identical protein binding;GO:0042803//protein homodimerization activity;GO:0044877//protein-containing complex binding;GO:0046872//metal ion binding;GO:0051082//unfo…	GO:0001666//response to hypoxia;GO:0002088//lens development in camera-type eye;GO:0006457//protein folding;GO:0007021//tubulin complex assembly;GO:0007517//muscle organ development;GO:0010629//negative regulation of gene expression;GO:0010941//regulation of cell death;GO:0030308//negative regulation of cell growth;GO:0031109//microtubule polymerization or depolymerization;GO:0031333//negative re…
ENSMUST00000216755	755839.625	736742.3125	645566.25	1154125.375	1251523.125	1048303	712716.0625	1151317.16666667	0.691885980225058	7.83315915135818e-07	8.59549339019571e-05	Cryab	crystallin, alpha B [Source:MGI Symbol;Acc:MGI:88516]	Genetic Information Processing;Organismal Systems	Folding, sorting and degradation;Aging	ko04141//Protein processing in endoplasmic reticulum;ko04213//Longevity regulating pathway - multiple species	K09542;K09542	GO:0005634//nucleus;GO:0005737//cytoplasm;GO:0005739//mitochondrion;GO:0005794//Golgi apparatus;GO:0005829//cytosol;GO:0005886//plasma membrane;GO:0009986//cell surface;GO:0014069//postsynaptic density;GO:0015630//microtubule cytoskeleton;GO:0030018//Z disc;GO:0030424//axon;GO:0031430//M band;GO:0031674//I band;GO:0032432//actin filament bundle;GO:0032991//protein-containing complex;GO:0043197//d…	GO:0001540//amyloid-beta binding;GO:0005198//structural molecule activity;GO:0005212//structural constituent of eye lens;GO:0005515//protein binding;GO:0008017//microtubule binding;GO:0008092//cytoskeletal protein binding;GO:0042802//identical protein binding;GO:0042803//protein homodimerization activity;GO:0044877//protein-containing complex binding;GO:0046872//metal ion binding;GO:0051082//unfo…	GO:0001666//response to hypoxia;GO:0002088//lens development in camera-type eye;GO:0006457//protein folding;GO:0007021//tubulin complex assembly;GO:0007517//muscle organ development;GO:0010629//negative regulation of gene expression;GO:0010941//regulation of cell death;GO:0030308//negative regulation of cell growth;GO:0031109//microtubule polymerization or depolymerization;GO:0031333//negative re…
ENSMUST00000217475	755839.625	736742.3125	645566.25	1154125.375	1251523.125	1048303	712716.0625	1151317.16666667	0.691885980225058	7.83315915135818e-07	8.59549339019571e-05	Cryab	crystallin, alpha B [Source:MGI Symbol;Acc:MGI:88516]	Genetic Information Processing;Organismal Systems	Folding, sorting and degradation;Aging	ko04141//Protein processing in endoplasmic reticulum;ko04213//Longevity regulating pathway - multiple species	K09542;K09542	GO:0005634//nucleus;GO:0005737//cytoplasm;GO:0005739//mitochondrion;GO:0005794//Golgi apparatus;GO:0005829//cytosol;GO:0005886//plasma membrane;GO:0009986//cell surface;GO:0014069//postsynaptic density;GO:0015630//microtubule cytoskeleton;GO:0030018//Z disc;GO:0030424//axon;GO:0031430//M band;GO:0031674//I band;GO:0032432//actin filament bundle;GO:0032991//protein-containing complex;GO:0043197//d…	GO:0001540//amyloid-beta binding;GO:0005198//structural molecule activity;GO:0005212//structural constituent of eye lens;GO:0005515//protein binding;GO:0008017//microtubule binding;GO:0008092//cytoskeletal protein binding;GO:0042802//identical protein binding;GO:0042803//protein homodimerization activity;GO:0044877//protein-containing complex binding;GO:0046872//metal ion binding;GO:0051082//unfo…	GO:0001666//response to hypoxia;GO:0002088//lens development in camera-type eye;GO:0006457//protein folding;GO:0007021//tubulin complex assembly;GO:0007517//muscle organ development;GO:0007568//aging;GO:0010259//multicellular organism aging;GO:0010629//negative regulation of gene expression;GO:0010941//regulation of cell death;GO:0030308//negative regulation of cell growth;GO:0031109//microtubule…
ENSMUST00000102825	312971.4375	468280.53125	349659.84375	129034.640625	190068.09375	85512.4765625	376970.604166667	134871.736979167	-1.48286397152308	7.98436139130107e-07	8.6077018858851e-05	Ifit3	interferon-induced protein with tetratricopeptide repeats 3 [Source:MGI Symbol;Acc:MGI:1101055]	-	-	-	-	GO:0005737//cytoplasm;GO:0005739//mitochondrion;GO:0005829//cytosol	GO:0003723//RNA binding;GO:0005515//protein binding;GO:0042802//identical protein binding	GO:0002376//immune system process;GO:0008285//negative regulation of cell proliferation;GO:0009615//response to virus;GO:0009617//response to bacterium;GO:0035457//cellular response to interferon-alpha;GO:0035458//cellular response to interferon-beta;GO:0035634//response to stilbenoid;GO:0043066//negative regulation of apoptotic process;GO:0045087//innate immune response;GO:0051607//defense respo…
ENSMUST00000105465	10219274	8922190	6907451	3856730	4775530	2958430	8682971.66666667	3863563.33333333	-1.16825682872335	8.700268113446e-07	9.21778406157339e-05	Psap	prosaposin [Source:MGI Symbol;Acc:MGI:97783]	Cellular Processes	Transport and catabolism	ko04142//Lysosome	K12382	GO:0005615//extracellular space;GO:0005764//lysosome	-	GO:0006629//lipid metabolic process;GO:0006665//sphingolipid metabolic process;GO:0007193//adenylate cyclase-inhibiting G protein-coupled receptor signaling pathway;GO:0019216//regulation of lipid metabolic process;GO:0060736//prostate gland growth;GO:0060742//epithelial cell differentiation involved in prostate gland development
ENSMUST00000165878	10219274	8922190	6907451	3856730	4775530	2958430	8682971.66666667	3863563.33333333	-1.16825682872335	8.700268113446e-07	9.21778406157339e-05	Psap	prosaposin [Source:MGI Symbol;Acc:MGI:97783]	Cellular Processes	Transport and catabolism	ko04142//Lysosome	K12382	GO:0005615//extracellular space;GO:0005764//lysosome	-	GO:0006629//lipid metabolic process;GO:0006665//sphingolipid metabolic process;GO:0007193//adenylate cyclase-inhibiting G protein-coupled receptor signaling pathway;GO:0019216//regulation of lipid metabolic process;GO:0060736//prostate gland growth;GO:0060742//epithelial cell differentiation involved in prostate gland development
ENSMUST00000085673	419588.65625	366748.53125	281726.71875	303796.53125	106342.359375	112734.2890625	356021.302083333	174291.059895833	-1.03046499599477	9.53500034429607e-07	9.78240479763353e-05	Pml	promyelocytic leukemia [Source:MGI Symbol;Acc:MGI:104662]	Human Diseases;Cellular Processes;Human Diseases;Human Diseases;Human Diseases;Genetic Information Processing;Human Diseases	Cancers;Transport and catabolism;Infectious diseases;Cancers;Infectious diseases;Folding, sorting and degradation;Cancers	ko05200//Pathways in cancer;ko04144//Endocytosis;ko05168//Herpes simplex infection;ko05202//Transcriptional misregulation in cancers;ko05164//Influenza A;ko04120//Ubiquitin mediated proteolysis;ko05221//Acute myeloid leukemia	K10054;K10054;K10054;K10054;K10054;K10054;K10054	GO:0000784//nuclear chromosome, telomeric region;GO:0000792//heterochromatin;GO:0005634//nucleus;GO:0005654//nucleoplasm;GO:0005730//nucleolus;GO:0005737//cytoplasm;GO:0005768//endosome;GO:0005783//endoplasmic reticulum;GO:0005789//endoplasmic reticulum membrane;GO:0005829//cytosol;GO:0016020//membrane;GO:0016363//nuclear matrix;GO:0016605//PML body;GO:0031901//early endosome membrane;GO:0031965/…	GO:0003677//DNA binding;GO:0003713//transcription coactivator activity;GO:0005515//protein binding;GO:0008270//zinc ion binding;GO:0031625//ubiquitin protein ligase binding;GO:0032183//SUMO binding;GO:0042803//protein homodimerization activity;GO:0046332//SMAD binding;GO:0046872//metal ion binding;GO:0046982//protein heterodimerization activity;GO:0050897//cobalt ion binding;GO:0140037//sumo-depe…	GO:0001666//response to hypoxia;GO:0001932//regulation of protein phosphorylation;GO:0002230//positive regulation of defense response to virus by host;GO:0002376//immune system process;GO:0006355//regulation of transcription, DNA-templated;GO:0006605//protein targeting;GO:0006606//protein import into nucleus;GO:0006915//apoptotic process;GO:0006919//activation of cysteine-type endopeptidase activ…
ENSMUST00000016315	827717.875	1208515.625	677941.1875	423734.5625	821518.875	289667.96875	904724.895833333	511640.46875	-0.82234879123436	1.48268352944084e-06	0.000142360785756469	Lamb3	laminin, beta 3 [Source:MGI Symbol;Acc:MGI:99915]	Human Diseases;Environmental Information Processing;Human Diseases;Cellular Processes;Human Diseases;Human Diseases;Environmental Information Processing;Human Diseases	Cancers;Signal transduction;Infectious diseases;Cellular community - eukaryotes;Infectious diseases;Infectious diseases;Signaling molecules and interaction;Cancers	ko05200//Pathways in cancer;ko04151//PI3K-Akt signaling pathway;ko05165//Human papillomavirus infection;ko04510//Focal adhesion;ko05146//Amoebiasis;ko05145//Toxoplasmosis;ko04512//ECM-receptor interaction;ko05222//Small cell lung cancer	K06244;K06244;K06244;K06244;K06244;K06244;K06244;K06244	GO:0005576//extracellular region;GO:0005604//basement membrane;GO:0005610//laminin-5 complex;GO:0043256//laminin complex;GO:0062023//collagen-containing extracellular matrix	GO:0005178//integrin binding;GO:0005201//extracellular matrix structural constituent;GO:0044877//protein-containing complex binding	GO:0007155//cell adhesion;GO:0009887//animal organ morphogenesis;GO:0009888//tissue development;GO:0016477//cell migration;GO:0034446//substrate adhesion-dependent cell spreading;GO:0050873//brown fat cell differentiation;GO:0070831//basement membrane assembly
ENSMUST00000159955	827717.875	1208515.625	677941.1875	423734.5625	821518.875	289667.96875	904724.895833333	511640.46875	-0.82234879123436	1.48268352944084e-06	0.000142360785756469	Lamb3	laminin, beta 3 [Source:MGI Symbol;Acc:MGI:99915]	Human Diseases;Environmental Information Processing;Human Diseases;Cellular Processes;Human Diseases;Human Diseases;Environmental Information Processing;Human Diseases	Cancers;Signal transduction;Infectious diseases;Cellular community - eukaryotes;Infectious diseases;Infectious diseases;Signaling molecules and interaction;Cancers	ko05200//Pathways in cancer;ko04151//PI3K-Akt signaling pathway;ko05165//Human papillomavirus infection;ko04510//Focal adhesion;ko05146//Amoebiasis;ko05145//Toxoplasmosis;ko04512//ECM-receptor interaction;ko05222//Small cell lung cancer	K06244;K06244;K06244;K06244;K06244;K06244;K06244;K06244	GO:0005576//extracellular region;GO:0005604//basement membrane;GO:0005610//laminin-5 complex;GO:0043256//laminin complex;GO:0062023//collagen-containing extracellular matrix	GO:0005178//integrin binding;GO:0005201//extracellular matrix structural constituent;GO:0044877//protein-containing complex binding	GO:0007155//cell adhesion;GO:0009887//animal organ morphogenesis;GO:0009888//tissue development;GO:0016477//cell migration;GO:0034446//substrate adhesion-dependent cell spreading;GO:0050873//brown fat cell differentiation;GO:0070831//basement membrane assembly
ENSMUST00000194677	827717.875	1208515.625	677941.1875	423734.5625	821518.875	289667.96875	904724.895833333	511640.46875	-0.82234879123436	1.48268352944084e-06	0.000142360785756469	Lamb3	laminin, beta 3 [Source:MGI Symbol;Acc:MGI:99915]	Human Diseases;Environmental Information Processing;Human Diseases;Cellular Processes;Human Diseases;Human Diseases;Environmental Information Processing;Human Diseases	Cancers;Signal transduction;Infectious diseases;Cellular community - eukaryotes;Infectious diseases;Infectious diseases;Signaling molecules and interaction;Cancers	ko05200//Pathways in cancer;ko04151//PI3K-Akt signaling pathway;ko05165//Human papillomavirus infection;ko04510//Focal adhesion;ko05146//Amoebiasis;ko05145//Toxoplasmosis;ko04512//ECM-receptor interaction;ko05222//Small cell lung cancer	K06244;K06244;K06244;K06244;K06244;K06244;K06244;K06244	GO:0005576//extracellular region;GO:0005604//basement membrane;GO:0005610//laminin-5 complex;GO:0043256//laminin complex;GO:0062023//collagen-containing extracellular matrix	GO:0005178//integrin binding;GO:0005201//extracellular matrix structural constituent;GO:0044877//protein-containing complex binding	GO:0007155//cell adhesion;GO:0009887//animal organ morphogenesis;GO:0009888//tissue development;GO:0016477//cell migration;GO:0034446//substrate adhesion-dependent cell spreading;GO:0035987//endodermal cell differentiation;GO:0050873//brown fat cell differentiation;GO:0070831//basement membrane assembly
ENSMUST00000032658	595510.5	849579.6875	863619.375	1474125.25	2044396.875	1093290.125	769569.854166667	1537270.75	0.998247088750113	1.54390058175165e-06	0.000145957985767137	Csrp3	cysteine and glycine-rich protein 3 [Source:MGI Symbol;Acc:MGI:1330824]	-	-	-	-	GO:0005623//cell;GO:0005634//nucleus;GO:0005737//cytoplasm;GO:0005856//cytoskeleton;GO:0030017//sarcomere;GO:0030018//Z disc	GO:0003779//actin binding;GO:0005515//protein binding;GO:0008307//structural constituent of muscle;GO:0031433//telethonin binding;GO:0042802//identical protein binding;GO:0042805//actinin binding;GO:0043426//MRF binding;GO:0046872//metal ion binding;GO:0061629//RNA polymerase II sequence-specific DNA-binding transcription factor binding	GO:0002026//regulation of the force of heart contraction;GO:0003300//cardiac muscle hypertrophy;GO:0006874//cellular calcium ion homeostasis;GO:0006954//inflammatory response;GO:0007275//multicellular organism development;GO:0007507//heart development;GO:0007517//muscle organ development;GO:0008286//insulin receptor signaling pathway;GO:0010831//positive regulation of myotube differentiation;GO:0…
ENSMUST00000167786	595510.5	849579.6875	863619.375	1474125.25	2044396.875	1093290.125	769569.854166667	1537270.75	0.998247088750113	1.54390058175165e-06	0.000145957985767137	Csrp3	cysteine and glycine-rich protein 3 [Source:MGI Symbol;Acc:MGI:1330824]	-	-	-	-	GO:0005623//cell;GO:0005634//nucleus;GO:0005737//cytoplasm;GO:0005856//cytoskeleton;GO:0030017//sarcomere;GO:0030018//Z disc	GO:0003779//actin binding;GO:0005515//protein binding;GO:0008307//structural constituent of muscle;GO:0031433//telethonin binding;GO:0042802//identical protein binding;GO:0042805//actinin binding;GO:0043426//MRF binding;GO:0046872//metal ion binding;GO:0061629//RNA polymerase II sequence-specific DNA-binding transcription factor binding	GO:0002026//regulation of the force of heart contraction;GO:0003300//cardiac muscle hypertrophy;GO:0006874//cellular calcium ion homeostasis;GO:0006954//inflammatory response;GO:0007275//multicellular organism development;GO:0007507//heart development;GO:0007517//muscle organ development;GO:0008286//insulin receptor signaling pathway;GO:0010831//positive regulation of myotube differentiation;GO:0…
ENSMUST00000022314	6575624	5942828	8385938.5	3281366.25	2898342.25	4813380.5	6968130.16666667	3664363	-0.927209147031148	1.58444090165261e-06	0.000147521050615989	Sftpa1	surfactant associated protein A1 [Source:MGI Symbol;Acc:MGI:109518]	Cellular Processes;Human Diseases	Transport and catabolism;Infectious diseases	ko04145//Phagosome;ko05133//Pertussis	K10067;K10067	-	-	-
ENSMUST00000170719	6575624	5942828	8385938.5	3281366.25	2898342.25	4813380.5	6968130.16666667	3664363	-0.927209147031148	1.58444090165261e-06	0.000147521050615989	Sftpa1	surfactant associated protein A1 [Source:MGI Symbol;Acc:MGI:109518]	Cellular Processes;Human Diseases	Transport and catabolism;Infectious diseases	ko04145//Phagosome;ko05133//Pertussis	K10067;K10067	GO:0005615//extracellular space;GO:0005771//multivesicular body;GO:0005791//rough endoplasmic reticulum;GO:0031410//cytoplasmic vesicle	-	GO:0001666//response to hypoxia;GO:0007623//circadian rhythm;GO:0009725//response to hormone;GO:0032496//response to lipopolysaccharide;GO:0032526//response to retinoic acid;GO:0033189//response to vitamin A;GO:0050766//positive regulation of phagocytosis;GO:0051384//response to glucocorticoid;GO:0055093//response to hyperoxia;GO:0070741//response to interleukin-6;GO:0070849//response to epiderma…
ENSMUST00000093902	279180.1875	210117.828125	376749.09375	148938.890625	231990.515625	160997.703125	288682.369791667	180642.369791667	-0.676346685378905	1.73982773925582e-06	0.00015760917863904	Rnf213	ring finger protein 213 [Source:MGI Symbol;Acc:MGI:1289196]	-	-	-	-	GO:0005730//nucleolus;GO:0005737//cytoplasm;GO:0005829//cytosol	GO:0004842//ubiquitin-protein transferase activity;GO:0016740//transferase activity;GO:0016787//hydrolase activity;GO:0016887//ATPase activity;GO:0046872//metal ion binding	GO:0001525//angiogenesis;GO:0002040//sprouting angiogenesis;GO:0006511//ubiquitin-dependent protein catabolic process;GO:0016567//protein ubiquitination;GO:0051260//protein homooligomerization;GO:0051865//protein autoubiquitination;GO:2000051//negative regulation of non-canonical Wnt signaling pathway
ENSMUST00000131035	279180.1875	210117.828125	376749.09375	148938.890625	231990.515625	160997.703125	288682.369791667	180642.369791667	-0.676346685378905	1.73982773925582e-06	0.00015760917863904	Rnf213	ring finger protein 213 [Source:MGI Symbol;Acc:MGI:1289196]	-	-	-	-	-	GO:0004842//ubiquitin-protein transferase activity;GO:0016887//ATPase activity	GO:0016567//protein ubiquitination
ENSMUST00000034285	1303348.375	1290389.875	1677321.125	474997	1024074.3125	789651	1423686.45833333	762907.4375	-0.90005152071232	2.46439620912395e-06	0.00021922739059165	Cotl1	coactosin-like 1 (Dictyostelium) [Source:MGI Symbol;Acc:MGI:1919292]	-	-	-	-	GO:0005575//cellular_component;GO:0005634//nucleus;GO:0005737//cytoplasm;GO:0005829//cytosol;GO:0005856//cytoskeleton;GO:0005884//actin filament;GO:0005886//plasma membrane;GO:0030427//site of polarized growth;GO:0030864//cortical actin cytoskeleton	GO:0003779//actin binding;GO:0005515//protein binding;GO:0019899//enzyme binding;GO:0051015//actin filament binding	GO:0030833//regulation of actin filament polymerization;GO:0050832//defense response to fungus
ENSMUST00000168698	1303348.375	1290389.875	1677321.125	474997	1024074.3125	789651	1423686.45833333	762907.4375	-0.90005152071232	2.46439620912395e-06	0.00021922739059165	Cotl1	coactosin-like 1 (Dictyostelium) [Source:MGI Symbol;Acc:MGI:1919292]	-	-	-	-	GO:0005575//cellular_component;GO:0005634//nucleus;GO:0005737//cytoplasm;GO:0005829//cytosol;GO:0005856//cytoskeleton;GO:0005884//actin filament;GO:0005886//plasma membrane;GO:0030427//site of polarized growth;GO:0030864//cortical actin cytoskeleton	GO:0003779//actin binding;GO:0005515//protein binding;GO:0019899//enzyme binding;GO:0051015//actin filament binding	GO:0030833//regulation of actin filament polymerization;GO:0050832//defense response to fungus
ENSMUST00000049768	567625.75	134229.890625	252609.40625	56231.06640625	46543.32421875	38334.71875	318155.015625	47036.3697916667	-2.75788124127322	2.79453734445551e-06	0.000238505999745544	Epx	eosinophil peroxidase [Source:MGI Symbol;Acc:MGI:107569]	Human Diseases	Immune diseases	ko05310//Asthma	K10788	GO:0005615//extracellular space;GO:0005737//cytoplasm	GO:0004601//peroxidase activity;GO:0016491//oxidoreductase activity;GO:0020037//heme binding;GO:0046872//metal ion binding	GO:0002215//defense response to nematode;GO:0006952//defense response;GO:0006979//response to oxidative stress;GO:0032693//negative regulation of interleukin-10 production;GO:0032714//negative regulation of interleukin-5 production;GO:0032753//positive regulation of interleukin-4 production;GO:0042742//defense response to bacterium;GO:0042744//hydrogen peroxide catabolic process;GO:0055114//oxida…
ENSMUST00000019246	943532.5	1210841.625	1178335	291306.1875	1275081.5	613053	1110903.04166667	726480.229166667	-0.612737464259069	3.01502713756093e-06	0.000247031223470825	Aldh3a1	aldehyde dehydrogenase family 3, subfamily A1 [Source:MGI Symbol;Acc:MGI:1353451]	Metabolism;Metabolism;Human Diseases;Metabolism;Metabolism;Metabolism;Metabolism;Metabolism;Metabolism	Global and overview maps;Carbohydrate metabolism;Cancers;Xenobiotics biodegradation and metabolism;Xenobiotics biodegradation and metabolism;Metabolism of other amino acids;Amino acid metabolism;Amino acid metabolism;Amino acid metabolism	ko01100//Metabolic pathways;ko00010//Glycolysis / Gluconeogenesis;ko05204//Chemical carcinogenesis;ko00980//Metabolism of xenobiotics by cytochrome P450;ko00982//Drug metabolism - cytochrome P450;ko00410//beta-Alanine metabolism;ko00340//Histidine metabolism;ko00350//Tyrosine metabolism;ko00360//Phenylalanine metabolism	K00129;K00129;K00129;K00129;K00129;K00129;K00129;K00129;K00129	GO:0005737//cytoplasm;GO:0005783//endoplasmic reticulum;GO:0005829//cytosol;GO:0005886//plasma membrane;GO:0016021//integral component of membrane	GO:0004028//3-chloroallyl aldehyde dehydrogenase activity;GO:0004029//aldehyde dehydrogenase (NAD) activity;GO:0004030//aldehyde dehydrogenase [NAD(P)+] activity;GO:0008106//alcohol dehydrogenase (NADP+) activity;GO:0016491//oxidoreductase activity;GO:0016620//oxidoreductase activity, acting on the aldehyde or oxo group of donors, NAD or NADP as acceptor;GO:0018479//benzaldehyde dehydrogenase (NA…	GO:0001666//response to hypoxia;GO:0006081//cellular aldehyde metabolic process;GO:0007568//aging;GO:0007584//response to nutrient;GO:0008284//positive regulation of cell proliferation;GO:0014070//response to organic cyclic compound;GO:0042493//response to drug;GO:0051384//response to glucocorticoid;GO:0051591//response to cAMP;GO:0055114//oxidation-reduction process
ENSMUST00000108716	943532.5	1210841.625	1178335	291306.1875	1275081.5	613053	1110903.04166667	726480.229166667	-0.612737464259069	3.01502713756093e-06	0.000247031223470825	Aldh3a1	aldehyde dehydrogenase family 3, subfamily A1 [Source:MGI Symbol;Acc:MGI:1353451]	Metabolism;Metabolism;Human Diseases;Metabolism;Metabolism;Metabolism;Metabolism;Metabolism;Metabolism	Global and overview maps;Carbohydrate metabolism;Cancers;Xenobiotics biodegradation and metabolism;Xenobiotics biodegradation and metabolism;Metabolism of other amino acids;Amino acid metabolism;Amino acid metabolism;Amino acid metabolism	ko01100//Metabolic pathways;ko00010//Glycolysis / Gluconeogenesis;ko05204//Chemical carcinogenesis;ko00980//Metabolism of xenobiotics by cytochrome P450;ko00982//Drug metabolism - cytochrome P450;ko00410//beta-Alanine metabolism;ko00340//Histidine metabolism;ko00350//Tyrosine metabolism;ko00360//Phenylalanine metabolism	K00129;K00129;K00129;K00129;K00129;K00129;K00129;K00129;K00129	GO:0005737//cytoplasm;GO:0005783//endoplasmic reticulum;GO:0005829//cytosol;GO:0005886//plasma membrane;GO:0016021//integral component of membrane	GO:0004028//3-chloroallyl aldehyde dehydrogenase activity;GO:0004029//aldehyde dehydrogenase (NAD) activity;GO:0004030//aldehyde dehydrogenase [NAD(P)+] activity;GO:0008106//alcohol dehydrogenase (NADP+) activity;GO:0016491//oxidoreductase activity;GO:0016620//oxidoreductase activity, acting on the aldehyde or oxo group of donors, NAD or NADP as acceptor;GO:0018479//benzaldehyde dehydrogenase (NA…	GO:0001666//response to hypoxia;GO:0006081//cellular aldehyde metabolic process;GO:0008284//positive regulation of cell proliferation;GO:0014070//response to organic cyclic compound;GO:0042493//response to drug;GO:0051384//response to glucocorticoid;GO:0051591//response to cAMP;GO:0055114//oxidation-reduction process
ENSMUST00000028794	157382.796875	115948.9453125	112828.9609375	75159.4296875	23037.7578125	9281.7109375	128720.234375	35826.2994791667	-1.84514791856336	3.17865879649134e-06	0.000257011293479464	Siglec1	sialic acid binding Ig-like lectin 1, sialoadhesin [Source:MGI Symbol;Acc:MGI:99668]	Environmental Information Processing	Signaling molecules and interaction	ko04514//Cell adhesion molecules (CAMs)	K06548	-	-	-
ENSMUST00000105287	848828.625	1007077.25	806706.5625	1585111.5	1623430	1122757.875	887537.479166667	1443766.45833333	0.701957444331828	4.02199710024447e-06	0.000311966830681502	Dcn	decorin [Source:MGI Symbol;Acc:MGI:94872]	Human Diseases;Environmental Information Processing	Cancers;Signal transduction	ko05205//Proteoglycans in cancer;ko04350//TGF-beta signaling pathway	K04660;K04660	GO:0005576//extracellular region;GO:0005589//collagen type VI trimer;GO:0005615//extracellular space;GO:0031012//extracellular matrix;GO:0062023//collagen-containing extracellular matrix	GO:0005515//protein binding;GO:0005518//collagen binding;GO:0005539//glycosaminoglycan binding;GO:0030021//extracellular matrix structural constituent conferring compression resistance;GO:0047485//protein N-terminus binding;GO:0050840//extracellular matrix binding	GO:0001822//kidney development;GO:0001890//placenta development;GO:0007519//skeletal muscle tissue development;GO:0007568//aging;GO:0009612//response to mechanical stimulus;GO:0010508//positive regulation of autophagy;GO:0010596//negative regulation of endothelial cell migration;GO:0014068//positive regulation of phosphatidylinositol 3-kinase signaling;GO:0016239//positive regulation of macroauto…
ENSMUST00000163448	848828.625	1007077.25	806706.5625	1585111.5	1623430	1122757.875	887537.479166667	1443766.45833333	0.701957444331828	4.02199710024447e-06	0.000311966830681502	Dcn	decorin [Source:MGI Symbol;Acc:MGI:94872]	Human Diseases;Environmental Information Processing	Cancers;Signal transduction	ko05205//Proteoglycans in cancer;ko04350//TGF-beta signaling pathway	K04660;K04660	GO:0005576//extracellular region;GO:0005589//collagen type VI trimer;GO:0005615//extracellular space;GO:0031012//extracellular matrix;GO:0062023//collagen-containing extracellular matrix	GO:0005515//protein binding;GO:0005518//collagen binding;GO:0005539//glycosaminoglycan binding;GO:0030021//extracellular matrix structural constituent conferring compression resistance;GO:0047485//protein N-terminus binding;GO:0050840//extracellular matrix binding	GO:0010508//positive regulation of autophagy;GO:0010596//negative regulation of endothelial cell migration;GO:0014068//positive regulation of phosphatidylinositol 3-kinase signaling;GO:0016239//positive regulation of macroautophagy;GO:0016525//negative regulation of angiogenesis;GO:0019800//peptide cross-linking via chondroitin 4-sulfate glycosaminoglycan;GO:0045944//positive regulation of transc…
ENSMUST00000138659	155177.875	155649.90625	256365.78125	266763.0625	316818.84375	406755.40625	189064.520833333	330112.4375	0.804078837631872	4.06140707152484e-06	0.000311966830681502	Gnao1	guanine nucleotide binding protein, alpha O [Source:MGI Symbol;Acc:MGI:95775]	Human Diseases;Human Diseases;Environmental Information Processing;Human Diseases;Organismal Systems;Organismal Systems;Organismal Systems;Human Diseases;Organismal Systems;Organismal Systems;Organismal Systems;Human Diseases;Organismal Systems;Organismal Systems;Organismal Systems;Human Diseases;Organismal Systems;Organismal Systems;Organismal Systems	Infectious disease: viral;Infectious diseases;Signal transduction;Substance dependence;Endocrine system;Nervous system;Nervous system;Infectious diseases;Endocrine system;Endocrine system;Nervous system;Infectious diseases;Environmental adaptation;Nervous system;Nervous system;Substance dependence;Endocrine system;Nervous system;Nervous system	ko05170//Human immunodeficiency virus 1 infection;ko05163//Human cytomegalovirus infection;ko04015//Rap1 signaling pathway;ko05034//Alcoholism;ko04926//Relaxin signaling pathway;ko04728//Dopaminergic synapse;ko04723//Retrograde endocannabinoid signaling;ko05145//Toxoplasmosis;ko04921//Oxytocin signaling pathway;ko04915//Estrogen signaling pathway;ko04725//Cholinergic synapse;ko05142//Chagas disea…	K04534;K04534;K04534;K04534;K04534;K04534;K04534;K04534;K04534;K04534;K04534;K04534;K04534;K04534;K04534;K04534;K04534;K04534;K04534	GO:0005834//heterotrimeric G-protein complex;GO:0005886//plasma membrane;GO:0016020//membrane;GO:0030425//dendrite;GO:0032991//protein-containing complex;GO:0043005//neuron projection;GO:0043209//myelin sheath;GO:0044297//cell body	GO:0000166//nucleotide binding;GO:0001664//G protein-coupled receptor binding;GO:0003924//GTPase activity;GO:0005102//signaling receptor binding;GO:0005515//protein binding;GO:0005525//GTP binding;GO:0019001//guanyl nucleotide binding;GO:0031683//G-protein beta/gamma-subunit complex binding;GO:0031821//G protein-coupled serotonin receptor binding;GO:0031852//mu-type opioid receptor binding;GO:003…	GO:0007165//signal transduction;GO:0007186//G protein-coupled receptor signaling pathway;GO:0007188//adenylate cyclase-modulating G protein-coupled receptor signaling pathway;GO:0007212//dopamine receptor signaling pathway;GO:0007568//aging;GO:0007626//locomotory behavior;GO:0008016//regulation of heart contraction;GO:0009987//cellular process;GO:0010243//response to organonitrogen compound;GO:00…
ENSMUST00000021668	1029028	710189.5625	1119539.25	521981.71875	377919.8125	663630.3125	952918.9375	521177.28125	-0.870579296341627	5.32846310018442e-06	0.000390186423407579	Npc2	NPC intracellular cholesterol transporter 2 [Source:MGI Symbol;Acc:MGI:1915213]	Cellular Processes;Organismal Systems	Transport and catabolism;Digestive system	ko04142//Lysosome;ko04979//Cholesterol metabolism	K13443;K13443	GO:0005576//extracellular region;GO:0005615//extracellular space;GO:0005764//lysosome;GO:0005783//endoplasmic reticulum	GO:0015485//cholesterol binding;GO:0019899//enzyme binding;GO:0032934//sterol binding;GO:0120020//intermembrane cholesterol transfer activity	GO:0006629//lipid metabolic process;GO:0006869//lipid transport;GO:0008202//steroid metabolic process;GO:0008203//cholesterol metabolic process;GO:0015918//sterol transport;GO:0030301//cholesterol transport;GO:0032366//intracellular sterol transport;GO:0032367//intracellular cholesterol transport;GO:0033344//cholesterol efflux;GO:0042632//cholesterol homeostasis
ENSMUST00000089017	115294.2421875	85237.7578125	121625.7421875	56423	58315.98046875	86918.0859375	107385.9140625	67219.0221354167	-0.675863305322912	5.33371189035584e-06	0.000390186423407579	Fndc3a	fibronectin type III domain containing 3A [Source:MGI Symbol;Acc:MGI:1196463]	-	-	-	-	GO:0000139//Golgi membrane;GO:0001669//acrosomal vesicle;GO:0005794//Golgi apparatus;GO:0005829//cytosol;GO:0012506//vesicle membrane;GO:0016020//membrane;GO:0016021//integral component of membrane;GO:0031410//cytoplasmic vesicle	GO:0005515//protein binding	GO:0007286//spermatid development;GO:0009566//fertilization;GO:0060009//Sertoli cell development;GO:0098609//cell-cell adhesion
ENSMUST00000162825	115294.2421875	85237.7578125	121625.7421875	56423	58315.98046875	86918.0859375	107385.9140625	67219.0221354167	-0.675863305322912	5.33371189035584e-06	0.000390186423407579	Fndc3a	fibronectin type III domain containing 3A [Source:MGI Symbol;Acc:MGI:1196463]	-	-	-	-	GO:0016020//membrane;GO:0016021//integral component of membrane	GO:0005515//protein binding	-
ENSMUST00000065487	2648683.75	4311508	3733981.75	5552751	5025603.5	6175564	3564724.5	5584639.5	0.647673572590103	5.72782969442563e-06	0.000409273412467971	Prx	periaxin [Source:MGI Symbol;Acc:MGI:108176]	-	-	-	-	-	GO:0005515//protein binding	-
ENSMUST00000098644	2648683.75	4311508	3733981.75	5552751	5025603.5	6175564	3564724.5	5584639.5	0.647673572590103	5.72782969442563e-06	0.000409273412467971	Prx	periaxin [Source:MGI Symbol;Acc:MGI:108176]	-	-	-	-	GO:0005634//nucleus;GO:0005737//cytoplasm	GO:0005515//protein binding	-
ENSMUST00000238936	2648683.75	4311508	3733981.75	5552751	5025603.5	6175564	3564724.5	5584639.5	0.647673572590103	5.72782969442563e-06	0.000409273412467971	Prx	periaxin [Source:MGI Symbol;Acc:MGI:108176]	-	-	-	-	-	GO:0005515//protein binding	-
ENSMUST00000238964	2648683.75	4311508	3733981.75	5552751	5025603.5	6175564	3564724.5	5584639.5	0.647673572590103	5.72782969442563e-06	0.000409273412467971	Prx	periaxin [Source:MGI Symbol;Acc:MGI:108176]	-	-	-	-	-	GO:0005515//protein binding	-
ENSMUST00000027675	466259.3125	315592.4375	525013.9375	37344.328125	25217	29443.4453125	435621.895833333	30668.2578125	-3.82825835249519	6.17058363080582e-06	0.000435841797831055	Pigr	polymeric immunoglobulin receptor [Source:MGI Symbol;Acc:MGI:103080]	Organismal Systems	Immune system	ko04672//Intestinal immune network for IgA production	K13073	GO:0005576//extracellular region;GO:0005615//extracellular space;GO:0005886//plasma membrane;GO:0016020//membrane;GO:0016021//integral component of membrane;GO:0030133//transport vesicle;GO:0043235//receptor complex;GO:0055038//recycling endosome membrane	GO:0001792//polymeric immunoglobulin receptor activity;GO:0005154//epidermal growth factor receptor binding	GO:0001580//detection of chemical stimulus involved in sensory perception of bitter taste;GO:0002415//immunoglobulin transcytosis in epithelial cells mediated by polymeric immunoglobulin receptor;GO:0007173//epidermal growth factor receptor signaling pathway;GO:0038093//Fc receptor signaling pathway;GO:0043113//receptor clustering
ENSMUST00000095541	124744.5625	134048.296875	140725.390625	69559.5859375	89846.765625	102925.4296875	133172.75	87443.9270833333	-0.606868807644647	7.43386117043082e-06	0.000513270526879746	Susd2	sushi domain containing 2 [Source:MGI Symbol;Acc:MGI:1918983]	-	-	-	-	GO:0005886//plasma membrane;GO:0016020//membrane;GO:0016021//integral component of membrane	GO:0003674//molecular_function	GO:0051782//negative regulation of cell division;GO:1902807//negative regulation of cell cycle G1/S phase transition
ENSMUST00000007275	256230.46875	41215.17578125	772248.5625	646201.4375	1233278.5	753191.5	356564.735677083	877557.145833333	1.29932904845311	8.9095893180957e-06	0.000582440705954235	Krt13	keratin 13 [Source:MGI Symbol;Acc:MGI:101925]	Human Diseases;Organismal Systems	Infectious diseases;Endocrine system	ko05150//Staphylococcus aureus infection;ko04915//Estrogen signaling pathway	K07604;K07604	GO:0005882//intermediate filament;GO:0045095//keratin filament;GO:0045111//intermediate filament cytoskeleton;GO:0070062//extracellular exosome	GO:0005198//structural molecule activity;GO:0005515//protein binding	GO:0007010//cytoskeleton organization;GO:0009314//response to radiation;GO:0043587//tongue morphogenesis;GO:0071300//cellular response to retinoic acid
ENSMUST00000025211	2236789.5	1618676	1987017	691021.1875	578017.375	29562.044921875	1947494.16666667	432866.869140625	-2.16962371840702	9.94095422881435e-06	0.000636324622250668	Mzb1	marginal zone B and B1 cell-specific protein 1 [Source:MGI Symbol;Acc:MGI:1917066]	-	-	-	-	GO:0005576//extracellular region;GO:0005737//cytoplasm;GO:0005783//endoplasmic reticulum;GO:0005788//endoplasmic reticulum lumen;GO:0034663//endoplasmic reticulum chaperone complex	GO:0003674//molecular_function;GO:0005515//protein binding	GO:0002642//positive regulation of immunoglobulin biosynthetic process;GO:0008284//positive regulation of cell proliferation;GO:0030888//regulation of B cell proliferation;GO:0033622//integrin activation;GO:0042127//regulation of cell proliferation;GO:0046626//regulation of insulin receptor signaling pathway
ENSMUST00000020969	765535	877355	1007487.3125	322549.5	663261.1875	418643.78125	883459.104166667	468151.489583333	-0.916187904723015	1.02739952523181e-05	0.000645022093205909	Cmpk2	cytidine monophosphate (UMP-CMP) kinase 2, mitochondrial [Source:MGI Symbol;Acc:MGI:99830]	Metabolism;Metabolism	Global and overview maps;Nucleotide metabolism	ko01100//Metabolic pathways;ko00240//Pyrimidine metabolism	K13809;K13809	GO:0005737//cytoplasm;GO:0005739//mitochondrion	GO:0000166//nucleotide binding;GO:0004127//cytidylate kinase activity;GO:0004550//nucleoside diphosphate kinase activity;GO:0004798//thymidylate kinase activity;GO:0005524//ATP binding;GO:0009041//uridylate kinase activity;GO:0016301//kinase activity;GO:0016740//transferase activity;GO:0033862//UMP kinase activity;GO:0050145//nucleoside monophosphate kinase activity	GO:0006165//nucleoside diphosphate phosphorylation;GO:0006221//pyrimidine nucleotide biosynthetic process;GO:0006227//dUDP biosynthetic process;GO:0006233//dTDP biosynthetic process;GO:0006235//dTTP biosynthetic process;GO:0009142//nucleoside triphosphate biosynthetic process;GO:0016310//phosphorylation;GO:0046940//nucleoside monophosphate phosphorylation;GO:0071222//cellular response to lipopoly…
ENSMUST00000026613	275990.6875	204348.296875	244034.78125	118036.3046875	71756.1484375	101618.5546875	241457.921875	97137.0026041667	-1.31367892262795	1.02867640576369e-05	0.000645022093205909	Gusb	glucuronidase, beta [Source:MGI Symbol;Acc:MGI:95872]	Metabolism;Cellular Processes;Metabolism;Metabolism;Metabolism;Metabolism	Global and overview maps;Transport and catabolism;Xenobiotics biodegradation and metabolism;Metabolism of cofactors and vitamins;Carbohydrate metabolism;Glycan biosynthesis and metabolism	ko01100//Metabolic pathways;ko04142//Lysosome;ko00983//Drug metabolism - other enzymes;ko00860//Porphyrin and chlorophyll metabolism;ko00040//Pentose and glucuronate interconversions;ko00531//Glycosaminoglycan degradation	K01195;K01195;K01195;K01195;K01195;K01195	GO:0005615//extracellular space;GO:0005764//lysosome;GO:0005783//endoplasmic reticulum;GO:0043231//intracellular membrane-bounded organelle	GO:0004553//hydrolase activity, hydrolyzing O-glycosyl compounds;GO:0004566//beta-glucuronidase activity;GO:0005102//signaling receptor binding;GO:0016787//hydrolase activity;GO:0016798//hydrolase activity, acting on glycosyl bonds;GO:0019904//protein domain specific binding;GO:0030246//carbohydrate binding	GO:0005975//carbohydrate metabolic process;GO:0008152//metabolic process;GO:0019391//glucuronoside catabolic process
ENSMUST00000081857	5461921.5	8183087.5	2292941.5	9206961	9089493	7492663	5312650.16666667	8596372.33333333	0.694296255602971	1.13720969427216e-05	0.00068511309522573	Myh6	myosin, heavy polypeptide 6, cardiac muscle, alpha [Source:MGI Symbol;Acc:MGI:97255]	Human Diseases;Organismal Systems;Environmental Information Processing;Human Diseases;Organismal Systems;Human Diseases;Organismal Systems	Cardiovascular diseases;Circulatory system;Signal transduction;Cardiovascular diseases;Endocrine system;Cardiovascular diseases;Circulatory system	ko05414//Dilated cardiomyopathy (DCM);ko04261//Adrenergic signaling in cardiomyocytes;ko04022//cGMP - PKG signaling pathway;ko05416//Viral myocarditis;ko04919//Thyroid hormone signaling pathway;ko05410//Hypertrophic cardiomyopathy (HCM);ko04260//Cardiac muscle contraction	K17751;K17751;K17751;K17751;K17751;K17751;K17751	GO:0001725//stress fiber;GO:0005737//cytoplasm;GO:0005739//mitochondrion;GO:0005859//muscle myosin complex;GO:0016459//myosin complex;GO:0030016//myofibril;GO:0030018//Z disc;GO:0032982//myosin filament	GO:0000146//microfilament motor activity;GO:0000166//nucleotide binding;GO:0003774//motor activity;GO:0003779//actin binding;GO:0005515//protein binding;GO:0005516//calmodulin binding;GO:0005524//ATP binding;GO:0016887//ATPase activity;GO:0019901//protein kinase binding;GO:0030898//actin-dependent ATPase activity;GO:0030899//calcium-dependent ATPase activity;GO:0042802//identical protein binding;…	GO:0001701//in utero embryonic development;GO:0002026//regulation of the force of heart contraction;GO:0002027//regulation of heart rate;GO:0006936//muscle contraction;GO:0006941//striated muscle contraction;GO:0007512//adult heart development;GO:0007522//visceral muscle development;GO:0008016//regulation of heart contraction;GO:0008217//regulation of blood pressure;GO:0014898//cardiac muscle hyp…
ENSMUST00000226297	5461921.5	8183087.5	2292941.5	9206961	9089493	7492663	5312650.16666667	8596372.33333333	0.694296255602971	1.13720969427216e-05	0.00068511309522573	Myh6	myosin, heavy polypeptide 6, cardiac muscle, alpha [Source:MGI Symbol;Acc:MGI:97255]	Human Diseases;Organismal Systems;Environmental Information Processing;Human Diseases;Organismal Systems;Human Diseases;Organismal Systems	Cardiovascular diseases;Circulatory system;Signal transduction;Cardiovascular diseases;Endocrine system;Cardiovascular diseases;Circulatory system	ko05414//Dilated cardiomyopathy (DCM);ko04261//Adrenergic signaling in cardiomyocytes;ko04022//cGMP - PKG signaling pathway;ko05416//Viral myocarditis;ko04919//Thyroid hormone signaling pathway;ko05410//Hypertrophic cardiomyopathy (HCM);ko04260//Cardiac muscle contraction	K17751;K17751;K17751;K17751;K17751;K17751;K17751	GO:0001725//stress fiber;GO:0005737//cytoplasm;GO:0005739//mitochondrion;GO:0005859//muscle myosin complex;GO:0016459//myosin complex;GO:0030016//myofibril;GO:0030018//Z disc;GO:0032982//myosin filament	GO:0000146//microfilament motor activity;GO:0000166//nucleotide binding;GO:0003774//motor activity;GO:0003779//actin binding;GO:0005515//protein binding;GO:0005516//calmodulin binding;GO:0005524//ATP binding;GO:0016887//ATPase activity;GO:0019901//protein kinase binding;GO:0030898//actin-dependent ATPase activity;GO:0030899//calcium-dependent ATPase activity;GO:0042802//identical protein binding;…	GO:0001701//in utero embryonic development;GO:0002026//regulation of the force of heart contraction;GO:0002027//regulation of heart rate;GO:0006936//muscle contraction;GO:0006941//striated muscle contraction;GO:0007512//adult heart development;GO:0007522//visceral muscle development;GO:0008016//regulation of heart contraction;GO:0008217//regulation of blood pressure;GO:0014898//cardiac muscle hyp…
ENSMUST00000113760	142389.03125	91943.625	185044.578125	27659.70703125	42593.0078125	70856.8125	139792.411458333	47036.5091145833	-1.57143314958806	1.53668361221392e-05	0.000907973153562938	H2-T24	histocompatibility 2, T region locus 24 [Source:MGI Symbol;Acc:MGI:95958]	Cellular Processes;Human Diseases;Human Diseases;Human Diseases;Human Diseases;Human Diseases;Human Diseases;Cellular Processes;Human Diseases;Human Diseases;Human Diseases;Environmental Information Processing;Cellular Processes;Human Diseases;Human Diseases;Organismal Systems;Human Diseases;Human Diseases	Transport and catabolism;Infectious diseases;Infectious diseases;Infectious disease: viral;Infectious diseases;Cancers;Infectious diseases;Transport and catabolism;Infectious diseases;Infectious diseases;Cardiovascular diseases;Signaling molecules and interaction;Cell growth and death;Immune diseases;Immune diseases;Immune system;Endocrine and metabolic diseases;Immune diseases	ko04144//Endocytosis;ko05165//Human papillomavirus infection;ko05169//Epstein-Barr virus infection;ko05170//Human immunodeficiency virus 1 infection;ko05163//Human cytomegalovirus infection;ko05203//Viral carcinogenesis;ko05168//Herpes simplex infection;ko04145//Phagosome;ko05167//Kaposi sarcoma-associated herpesvirus infection;ko05166//HTLV-I infection;ko05416//Viral myocarditis;ko04514//Cell ad…	K06751;K06751;K06751;K06751;K06751;K06751;K06751;K06751;K06751;K06751;K06751;K06751;K06751;K06751;K06751;K06751;K06751;K06751	GO:0005615//extracellular space;GO:0009897//external side of plasma membrane;GO:0016020//membrane;GO:0016021//integral component of membrane	-	GO:0001916//positive regulation of T cell mediated cytotoxicity;GO:0002476//antigen processing and presentation of endogenous peptide antigen via MHC class Ib
ENSMUST00000000287	307239.6875	244999.28125	257523.34375	95032.09375	199141.78125	91771.9453125	269920.770833333	128648.606770833	-1.06910016559401	1.59080818115556e-05	0.000931001549828661	Scpep1	serine carboxypeptidase 1 [Source:MGI Symbol;Acc:MGI:1921867]	-	-	-	-	GO:0005576//extracellular region;GO:0005829//cytosol	GO:0004180//carboxypeptidase activity;GO:0004185//serine-type carboxypeptidase activity;GO:0008233//peptidase activity;GO:0016787//hydrolase activity	GO:0006508//proteolysis;GO:0042573//retinoic acid metabolic process;GO:0045776//negative regulation of blood pressure;GO:0051603//proteolysis involved in cellular protein catabolic process;GO:0097755//positive regulation of blood vessel diameter
ENSMUST00000026328	750567.875	676448.75	843114.5	325050.3125	250847.15625	532288.5625	756710.375	369395.34375	-1.03457554439024	1.85598749632044e-05	0.00107594746838577	Prdx4	peroxiredoxin 4 [Source:MGI Symbol;Acc:MGI:1859815]	Cellular Processes	Cell growth and death	ko04214//Apoptosis - fly	K03386	GO:0005615//extracellular space;GO:0005623//cell;GO:0005737//cytoplasm;GO:0005739//mitochondrion;GO:0005783//endoplasmic reticulum;GO:0005790//smooth endoplasmic reticulum;GO:0005829//cytosol	GO:0004601//peroxidase activity;GO:0005515//protein binding;GO:0008379//thioredoxin peroxidase activity;GO:0016209//antioxidant activity;GO:0016491//oxidoreductase activity;GO:0051920//peroxiredoxin activity	GO:0006979//response to oxidative stress;GO:0007283//spermatogenesis;GO:0008584//male gonad development;GO:0018401//peptidyl-proline hydroxylation to 4-hydroxy-L-proline;GO:0022417//protein maturation by protein folding;GO:0030198//extracellular matrix organization;GO:0045454//cell redox homeostasis;GO:0055114//oxidation-reduction process;GO:0072593//reactive oxygen species metabolic process;GO:0…
ENSMUST00000093943	275463.6875	227617.078125	333649.1875	159167.109375	189759.078125	185670.015625	278909.984375	178198.734375	-0.646312490247106	2.08953147983865e-05	0.00118890471700079	Cbx1	chromobox 1 [Source:MGI Symbol;Acc:MGI:105369]	-	-	-	-	GO:0000775//chromosome, centromeric region;GO:0000784//nuclear chromosome, telomeric region;GO:0000785//chromatin;GO:0001939//female pronucleus;GO:0001940//male pronucleus;GO:0005634//nucleus;GO:0005721//pericentric heterochromatin;GO:0005819//spindle;GO:0010369//chromocenter;GO:0090734//site of DNA damage	GO:0005515//protein binding;GO:0019899//enzyme binding;GO:0042802//identical protein binding;GO:1990226//histone methyltransferase binding	GO:0006974//cellular response to DNA damage stimulus;GO:0045892//negative regulation of transcription, DNA-templated
ENSMUST00000071044	1906003.25	1358354.25	1473799.25	966321.6875	925997.125	678526.375	1579385.58333333	856948.395833333	-0.882083191482017	2.95249990709957e-05	0.0015776619068806	Capg	capping protein (actin filament), gelsolin-like [Source:MGI Symbol;Acc:MGI:1098259]	-	-	-	-	-	GO:0051015//actin filament binding	GO:0051016//barbed-end actin filament capping
ENSMUST00000114071	1906003.25	1358354.25	1473799.25	966321.6875	925997.125	678526.375	1579385.58333333	856948.395833333	-0.882083191482017	2.95249990709957e-05	0.0015776619068806	Capg	capping protein (actin filament), gelsolin-like [Source:MGI Symbol;Acc:MGI:1098259]	-	-	-	-	GO:0005634//nucleus;GO:0005654//nucleoplasm;GO:0005730//nucleolus;GO:0005737//cytoplasm;GO:0005814//centriole;GO:0072686//mitotic spindle;GO:0090543//Flemming body	GO:0019904//protein domain specific binding;GO:0044877//protein-containing complex binding;GO:0051015//actin filament binding	GO:0051016//barbed-end actin filament capping
ENSMUST00000114072	1906003.25	1358354.25	1473799.25	966321.6875	925997.125	678526.375	1579385.58333333	856948.395833333	-0.882083191482017	2.95249990709957e-05	0.0015776619068806	Capg	capping protein (actin filament), gelsolin-like [Source:MGI Symbol;Acc:MGI:1098259]	-	-	-	-	-	GO:0051015//actin filament binding	GO:0051016//barbed-end actin filament capping
ENSMUST00000043315	637050	735301	808783.0625	153987.984375	279847.84375	33449.1484375	727044.6875	155761.658854167	-2.22270388763676	5.34794679084805e-05	0.00265025266369043	Serpina3g	serine (or cysteine) peptidase inhibitor, clade A, member 3G [Source:MGI Symbol;Acc:MGI:105046]	-	-	-	-	GO:0005615//extracellular space	-	-
ENSMUST00000005185	4517152	3724790.25	3975929	3085536.25	2320361.75	2572078.75	4072623.75	2659325.58333333	-0.614898118581086	5.47453222065152e-05	0.00267739221182384	Cstb	cystatin B [Source:MGI Symbol;Acc:MGI:109514]	-	-	-	-	GO:0005615//extracellular space;GO:0005634//nucleus;GO:0005730//nucleolus;GO:0005737//cytoplasm;GO:0005829//cytosol;GO:0062023//collagen-containing extracellular matrix	GO:0002020//protease binding;GO:0004866//endopeptidase inhibitor activity;GO:0004869//cysteine-type endopeptidase inhibitor activity;GO:0030414//peptidase inhibitor activity	GO:0008344//adult locomotory behavior;GO:0010466//negative regulation of peptidase activity;GO:0010951//negative regulation of endopeptidase activity;GO:0045861//negative regulation of proteolysis
ENSMUST00000015484	309793.4375	262334.65625	249299.03125	155057.53125	224654.9375	91045.4296875	273809.041666667	156919.299479167	-0.803147287718367	5.82598572809629e-05	0.00275389863839628	Cybb	cytochrome b-245, beta polypeptide [Source:MGI Symbol;Acc:MGI:88574]	Human Diseases;Cellular Processes;Organismal Systems;Cellular Processes;Organismal Systems;Human Diseases;Environmental Information Processing;Human Diseases;Cellular Processes	Neurodegenerative diseases;Transport and catabolism;Immune system;Cell growth and death;Immune system;Infectious diseases;Signal transduction;Endocrine and metabolic diseases;Cell growth and death	ko05010//Alzheimer disease;ko04145//Phagosome;ko04621//NOD-like receptor signaling pathway;ko04217//Necroptosis;ko04670//Leukocyte transendothelial migration;ko05140//Leishmaniasis;ko04066//HIF-1 signaling pathway;ko04933//AGE-RAGE signaling pathway in diabetic complications;ko04216//Ferroptosis	K21421;K21421;K21421;K21421;K21421;K21421;K21421;K21421;K21421	GO:0005635//nuclear envelope;GO:0005737//cytoplasm;GO:0005739//mitochondrion;GO:0005783//endoplasmic reticulum;GO:0005791//rough endoplasmic reticulum;GO:0005794//Golgi apparatus;GO:0005886//plasma membrane;GO:0005887//integral component of plasma membrane;GO:0016020//membrane;GO:0016021//integral component of membrane;GO:0030425//dendrite;GO:0043020//NADPH oxidase complex;GO:0043025//neuronal ce…	GO:0005244//voltage-gated ion channel activity;GO:0005515//protein binding;GO:0009055//electron transfer activity;GO:0016175//superoxide-generating NADPH oxidase activity;GO:0016491//oxidoreductase activity;GO:0020037//heme binding;GO:0046872//metal ion binding;GO:0046982//protein heterodimerization activity;GO:0050660//flavin adenine dinucleotide binding	GO:0006801//superoxide metabolic process;GO:0006811//ion transport;GO:0006952//defense response;GO:0006954//inflammatory response;GO:0007584//response to nutrient;GO:0022900//electron transport chain;GO:0034220//ion transmembrane transport;GO:0034765//regulation of ion transmembrane transport;GO:0042493//response to drug;GO:0042535//positive regulation of tumor necrosis factor biosynthetic proces…
ENSMUST00000036247	114265.5859375	96862.6875	84317.8984375	219671.84375	132295.265625	207275.3125	98482.0572916667	186414.140625	0.920578496000286	6.66275271502878e-05	0.00310171329044332	C030006K11Rik	RIKEN cDNA C030006K11 gene [Source:MGI Symbol;Acc:MGI:1925941]	-	-	-	-	GO:0005739//mitochondrion	GO:0003674//molecular_function	GO:0008150//biological_process
ENSMUST00000103363	1247588.75	91651.015625	79532.75	59026.375	15154.4638671875	8133.28173828125	472924.171875	27438.0402018229	-4.107359538113	7.60491920750987e-05	0.0034372056066466	Igkv4-50	immunoglobulin kappa variable 4-50 [Source:MGI Symbol;Acc:MGI:2685915]	-	-	-	-	GO:0005615//extracellular space	-	GO:0002377//immunoglobulin production;GO:0006955//immune response
ENSMUST00000117095	250037.171875	166071.21875	171496.359375	141262.109375	105744.8359375	92540.125	195868.25	113182.356770833	-0.791234473722306	7.60715968273291e-05	0.0034372056066466	Pld3	phospholipase D family, member 3 [Source:MGI Symbol;Acc:MGI:1333782]	Metabolism;Metabolism;Metabolism	Global and overview maps;Lipid metabolism;Lipid metabolism	ko01100//Metabolic pathways;ko00564//Glycerophospholipid metabolism;ko00565//Ether lipid metabolism	K16860;K16860;K16860	GO:0000139//Golgi membrane;GO:0005764//lysosome;GO:0005765//lysosomal membrane;GO:0005768//endosome;GO:0005783//endoplasmic reticulum;GO:0005789//endoplasmic reticulum membrane;GO:0005794//Golgi apparatus;GO:0010008//endosome membrane;GO:0016020//membrane;GO:0016021//integral component of membrane;GO:0031901//early endosome membrane;GO:0031902//late endosome membrane;GO:0043202//lysosomal lumen	GO:0003824//catalytic activity;GO:0004518//nuclease activity;GO:0004527//exonuclease activity;GO:0004630//phospholipase D activity;GO:0016787//hydrolase activity;GO:0045145//single-stranded DNA 5'-3' exodeoxyribonuclease activity	GO:0002376//immune system process;GO:0006259//DNA metabolic process;GO:0006954//inflammatory response;GO:0014902//myotube differentiation;GO:0045087//innate immune response;GO:0090305//nucleic acid phosphodiester bond hydrolysis;GO:1900015//regulation of cytokine production involved in inflammatory response
ENSMUST00000117611	250037.171875	166071.21875	171496.359375	141262.109375	105744.8359375	92540.125	195868.25	113182.356770833	-0.791234473722306	7.60715968273291e-05	0.0034372056066466	Pld3	phospholipase D family, member 3 [Source:MGI Symbol;Acc:MGI:1333782]	Metabolism;Metabolism;Metabolism	Global and overview maps;Lipid metabolism;Lipid metabolism	ko01100//Metabolic pathways;ko00564//Glycerophospholipid metabolism;ko00565//Ether lipid metabolism	K16860;K16860;K16860	GO:0000139//Golgi membrane;GO:0005764//lysosome;GO:0005765//lysosomal membrane;GO:0005768//endosome;GO:0005783//endoplasmic reticulum;GO:0005789//endoplasmic reticulum membrane;GO:0005794//Golgi apparatus;GO:0010008//endosome membrane;GO:0016020//membrane;GO:0016021//integral component of membrane;GO:0031901//early endosome membrane;GO:0031902//late endosome membrane;GO:0043202//lysosomal lumen	GO:0003824//catalytic activity;GO:0004518//nuclease activity;GO:0004527//exonuclease activity;GO:0004630//phospholipase D activity;GO:0016787//hydrolase activity;GO:0045145//single-stranded DNA 5'-3' exodeoxyribonuclease activity	GO:0002376//immune system process;GO:0006259//DNA metabolic process;GO:0006954//inflammatory response;GO:0014902//myotube differentiation;GO:0045087//innate immune response;GO:0090305//nucleic acid phosphodiester bond hydrolysis;GO:1900015//regulation of cytokine production involved in inflammatory response
ENSMUST00000031668	1936054	5422150	1007679.1875	483135.15625	1264208.375	1249412.625	2788627.72916667	998918.71875	-1.48111615618984	8.36712831435727e-05	0.00365091455190209	Col1a2	collagen, type I, alpha 2 [Source:MGI Symbol;Acc:MGI:88468]	Environmental Information Processing;Human Diseases;Cellular Processes;Human Diseases;Human Diseases;Organismal Systems;Organismal Systems;Environmental Information Processing;Human Diseases;Organismal Systems	Signal transduction;Infectious diseases;Cellular community - eukaryotes;Cancers;Infectious diseases;Endocrine system;Immune system;Signaling molecules and interaction;Endocrine and metabolic diseases;Digestive system	ko04151//PI3K-Akt signaling pathway;ko05165//Human papillomavirus infection;ko04510//Focal adhesion;ko05205//Proteoglycans in cancer;ko05146//Amoebiasis;ko04926//Relaxin signaling pathway;ko04611//Platelet activation;ko04512//ECM-receptor interaction;ko04933//AGE-RAGE signaling pathway in diabetic complications;ko04974//Protein digestion and absorption	K06236;K06236;K06236;K06236;K06236;K06236;K06236;K06236;K06236;K06236	GO:0005576//extracellular region;GO:0005581//collagen trimer;GO:0005584//collagen type I trimer;GO:0005615//extracellular space;GO:0005783//endoplasmic reticulum;GO:0031012//extracellular matrix;GO:0062023//collagen-containing extracellular matrix	GO:0002020//protease binding;GO:0005201//extracellular matrix structural constituent;GO:0005515//protein binding;GO:0030020//extracellular matrix structural constituent conferring tensile strength;GO:0030674//protein binding, bridging;GO:0042802//identical protein binding;GO:0046332//SMAD binding;GO:0046872//metal ion binding;GO:0048407//platelet-derived growth factor binding	GO:0001501//skeletal system development;GO:0001568//blood vessel development;GO:0007179//transforming growth factor beta receptor signaling pathway;GO:0007266//Rho protein signal transduction;GO:0008217//regulation of blood pressure;GO:0030198//extracellular matrix organization;GO:0030199//collagen fibril organization;GO:0030282//bone mineralization;GO:0032963//collagen metabolic process;GO:00435…
ENSMUST00000028624	323210.5625	237629.703125	265867.25	56588.96875	117078.9453125	93795.7265625	275569.171875	89154.546875	-1.62803421954405	8.39168294495039e-05	0.00365091455190209	Gatm	glycine amidinotransferase (L-arginine:glycine amidinotransferase) [Source:MGI Symbol;Acc:MGI:1914342]	Metabolism;Metabolism;Metabolism	Global and overview maps;Amino acid metabolism;Amino acid metabolism	ko01100//Metabolic pathways;ko00330//Arginine and proline metabolism;ko00260//Glycine, serine and threonine metabolism	K00613;K00613;K00613	GO:0005739//mitochondrion;GO:0005743//mitochondrial inner membrane;GO:0005758//mitochondrial intermembrane space;GO:0016020//membrane	GO:0015067//amidinotransferase activity;GO:0015068//glycine amidinotransferase activity;GO:0016740//transferase activity	GO:0006600//creatine metabolic process;GO:0006601//creatine biosynthetic process;GO:0007275//multicellular organism development;GO:0007584//response to nutrient;GO:0007611//learning or memory;GO:0010033//response to organic substance;GO:0014889//muscle atrophy;GO:0043434//response to peptide hormone;GO:0046689//response to mercury ion;GO:0120162//positive regulation of cold-induced thermogenesis
ENSMUST00000103426	13750146	7355135.5	7950769.5	6331959.5	7185064.5	2234100	9685350.33333333	5250374.66666667	-0.883383857017686	9.65578972668113e-05	0.00403832981892916	Ighm	immunoglobulin heavy constant mu [Source:MGI Symbol;Acc:MGI:96448]	Environmental Information Processing;Human Diseases;Human Diseases;Environmental Information Processing;Cellular Processes;Organismal Systems;Environmental Information Processing;Human Diseases;Human Diseases;Environmental Information Processing;Human Diseases;Human Diseases;Organismal Systems;Organismal Systems;Human Diseases;Organismal Systems;Human Diseases;Organismal Systems;Human Diseases;Hu…	Signal transduction;Infectious diseases;Infectious diseases;Signal transduction;Transport and catabolism;Immune system;Signal transduction;Cancers;Immune diseases;Signal transduction;Cardiovascular diseases;Infectious diseases;Immune system;Immune system;Cardiovascular diseases;Immune system;Infectious diseases;Immune system;Immune diseases;Infectious diseases;Infectious diseases;Infectious disea…	ko04151//PI3K-Akt signaling pathway;ko05169//Epstein-Barr virus infection;ko05152//Tuberculosis;ko04072//Phospholipase D signaling pathway;ko04145//Phagosome;ko04666//Fc gamma R-mediated phagocytosis;ko04020//Calcium signaling pathway;ko05202//Transcriptional misregulation in cancers;ko05322//Systemic lupus erythematosus;ko04064//NF-kappa B signaling pathway;ko05414//Dilated cardiomyopathy (DCM);…	K06856;K06856;K06856;K06856;K06856;K06856;K06856;K06856;K06856;K06856;K06856;K06856;K06856;K06856;K06856;K06856;K06856;K06856;K06856;K06856;K06856;K06856;K06856;K06856;K06856;K06856;K06856	-	-	-
ENSMUST00000029671	237219.4375	188449.953125	333908.78125	96915.5390625	44428.73046875	54382.921875	253192.723958333	65242.3971354167	-1.95635425077209	0.000104250893687432	0.00429947477657228	Ifi44	interferon-induced protein 44 [Source:MGI Symbol;Acc:MGI:2443016]	-	-	-	-	GO:0005737//cytoplasm	GO:0003674//molecular_function	GO:0006955//immune response;GO:0009617//response to bacterium
ENSMUST00000103367	1409750.25	1277386	754375.625	595293.75	531359.5	445419.90625	1147170.625	524024.385416667	-1.13037413319458	0.000113915019850417	0.00463581322503849	Igkv12-44	immunoglobulin kappa variable 12-44 [Source:MGI Symbol;Acc:MGI:4439775]	-	-	-	-	GO:0005615//extracellular space	-	GO:0002377//immunoglobulin production;GO:0006955//immune response
ENSMUST00000111430	202992.328125	202726.921875	67985.59375	313156.8125	297315.125	106380.703125	157901.614583333	238950.880208333	0.597688158769523	0.000115048543263846	0.00465114012076536	Mybpc3	myosin binding protein C, cardiac [Source:MGI Symbol;Acc:MGI:102844]	Human Diseases;Human Diseases	Cardiovascular diseases;Cardiovascular diseases	ko05414//Dilated cardiomyopathy (DCM);ko05410//Hypertrophic cardiomyopathy (HCM)	K12568;K12568	-	GO:0005515//protein binding	-
ENSMUST00000169776	202992.328125	202726.921875	67985.59375	313156.8125	297315.125	106380.703125	157901.614583333	238950.880208333	0.597688158769523	0.000115048543263846	0.00465114012076536	Mybpc3	myosin binding protein C, cardiac [Source:MGI Symbol;Acc:MGI:102844]	Human Diseases;Human Diseases	Cardiovascular diseases;Cardiovascular diseases	ko05414//Dilated cardiomyopathy (DCM);ko05410//Hypertrophic cardiomyopathy (HCM)	K12568;K12568	GO:0005863//striated muscle myosin thick filament;GO:0030017//sarcomere;GO:0031672//A band;GO:0097512//cardiac myofibril	GO:0005515//protein binding;GO:0008307//structural constituent of muscle;GO:0017022//myosin binding;GO:0032036//myosin heavy chain binding;GO:0042802//identical protein binding	GO:0003007//heart morphogenesis;GO:0006942//regulation of striated muscle contraction;GO:0055010//ventricular cardiac muscle tissue morphogenesis;GO:0060048//cardiac muscle contraction
ENSMUST00000003100	1955318.375	2427475.5	2495073.5	3278127.25	3165164.25	5390034	2292622.45833333	3944441.83333333	0.782822366923024	0.000125412816007165	0.00500429710625995	Cyp2f2	cytochrome P450, family 2, subfamily f, polypeptide 2 [Source:MGI Symbol;Acc:MGI:88608]	Metabolism	Xenobiotics biodegradation and metabolism	ko00980//Metabolism of xenobiotics by cytochrome P450	K07416	GO:0005737//cytoplasm;GO:0005783//endoplasmic reticulum;GO:0005789//endoplasmic reticulum membrane;GO:0016020//membrane;GO:0031090//organelle membrane;GO:0043231//intracellular membrane-bounded organelle	GO:0004497//monooxygenase activity;GO:0005506//iron ion binding;GO:0008392//arachidonic acid epoxygenase activity;GO:0008395//steroid hydroxylase activity;GO:0016491//oxidoreductase activity;GO:0016705//oxidoreductase activity, acting on paired donors, with incorporation or reduction of molecular oxygen;GO:0016712//oxidoreductase activity, acting on paired donors, with incorporation or reduction …	GO:0006082//organic acid metabolic process;GO:0006805//xenobiotic metabolic process;GO:0009636//response to toxic substance;GO:0018931//naphthalene metabolic process;GO:0018979//trichloroethylene metabolic process;GO:0019373//epoxygenase P450 pathway;GO:0042738//exogenous drug catabolic process;GO:0055114//oxidation-reduction process
ENSMUST00000027824	208623.28125	631484.6875	392564.375	178631.25	365583	165665.5	410890.78125	236626.583333333	-0.796142803117905	0.000127619841242346	0.00505209251200008	Apcs	serum amyloid P-component [Source:MGI Symbol;Acc:MGI:98229]	-	-	-	-	GO:0005576//extracellular region;GO:0005615//extracellular space;GO:0032991//protein-containing complex	GO:0001849//complement component C1q binding;GO:0005509//calcium ion binding;GO:0030169//low-density lipoprotein particle binding;GO:0030246//carbohydrate binding;GO:0042802//identical protein binding;GO:0046790//virion binding;GO:0046872//metal ion binding	GO:0006958//complement activation, classical pathway;GO:0044793//negative regulation by host of viral process;GO:0044869//negative regulation by host of viral exo-alpha-sialidase activity;GO:0044871//negative regulation by host of viral glycoprotein metabolic process;GO:0045087//innate immune response;GO:0045656//negative regulation of monocyte differentiation;GO:0046597//negative regulation of v…
ENSMUST00000040655	1237758.75	840869.5625	1519590.125	636587.125	665339.1875	483001.5	1199406.14583333	594975.9375	-1.01141704232768	0.000134018351073687	0.00508527335704495	H2-Aa	histocompatibility 2, class II antigen A, alpha [Source:MGI Symbol;Acc:MGI:95895]	Human Diseases;Human Diseases;Human Diseases;Cellular Processes;Human Diseases;Human Diseases;Human Diseases;Human Diseases;Human Diseases;Organismal Systems;Human Diseases;Environmental Information Processing;Human Diseases;Human Diseases;Organismal Systems;Human Diseases;Human Diseases;Organismal Systems;Human Diseases;Organismal Systems;Organismal Systems;Human Diseases;Human Diseases;Human Di…	Infectious diseases;Infectious diseases;Infectious diseases;Transport and catabolism;Infectious diseases;Immune diseases;Infectious diseases;Cardiovascular diseases;Infectious diseases;Immune system;Infectious diseases;Signaling molecules and interaction;Immune diseases;Infectious diseases;Immune system;Immune diseases;Immune diseases;Immune system;Immune diseases;Immune system;Immune system;Immu…	ko05169//Epstein-Barr virus infection;ko05152//Tuberculosis;ko05168//Herpes simplex infection;ko04145//Phagosome;ko05166//HTLV-I infection;ko05322//Systemic lupus erythematosus;ko05164//Influenza A;ko05416//Viral myocarditis;ko05145//Toxoplasmosis;ko04640//Hematopoietic cell lineage;ko05140//Leishmaniasis;ko04514//Cell adhesion molecules (CAMs);ko05323//Rheumatoid arthritis;ko05150//Staphylococcu…	K06752;K06752;K06752;K06752;K06752;K06752;K06752;K06752;K06752;K06752;K06752;K06752;K06752;K06752;K06752;K06752;K06752;K06752;K06752;K06752;K06752;K06752;K06752;K06752	GO:0005764//lysosome;GO:0005886//plasma membrane;GO:0009897//external side of plasma membrane;GO:0016020//membrane;GO:0016021//integral component of membrane;GO:0042613//MHC class II protein complex	GO:0005515//protein binding;GO:0042605//peptide antigen binding;GO:0044877//protein-containing complex binding	GO:0002250//adaptive immune response;GO:0002376//immune system process;GO:0002504//antigen processing and presentation of peptide or polysaccharide antigen via MHC class II;GO:0006955//immune response;GO:0019882//antigen processing and presentation;GO:0019886//antigen processing and presentation of exogenous peptide antigen via MHC class II;GO:0034341//response to interferon-gamma;GO:0042130//neg…
ENSMUST00000174751	1237758.75	840869.5625	1519590.125	636587.125	665339.1875	483001.5	1199406.14583333	594975.9375	-1.01141704232768	0.000134018351073687	0.00508527335704495	H2-Aa	histocompatibility 2, class II antigen A, alpha [Source:MGI Symbol;Acc:MGI:95895]	Human Diseases;Human Diseases;Human Diseases;Cellular Processes;Human Diseases;Human Diseases;Human Diseases;Human Diseases;Human Diseases;Organismal Systems;Human Diseases;Environmental Information Processing;Human Diseases;Human Diseases;Organismal Systems;Human Diseases;Human Diseases;Organismal Systems;Human Diseases;Organismal Systems;Organismal Systems;Human Diseases;Human Diseases;Human Di…	Infectious diseases;Infectious diseases;Infectious diseases;Transport and catabolism;Infectious diseases;Immune diseases;Infectious diseases;Cardiovascular diseases;Infectious diseases;Immune system;Infectious diseases;Signaling molecules and interaction;Immune diseases;Infectious diseases;Immune system;Immune diseases;Immune diseases;Immune system;Immune diseases;Immune system;Immune system;Immu…	ko05169//Epstein-Barr virus infection;ko05152//Tuberculosis;ko05168//Herpes simplex infection;ko04145//Phagosome;ko05166//HTLV-I infection;ko05322//Systemic lupus erythematosus;ko05164//Influenza A;ko05416//Viral myocarditis;ko05145//Toxoplasmosis;ko04640//Hematopoietic cell lineage;ko05140//Leishmaniasis;ko04514//Cell adhesion molecules (CAMs);ko05323//Rheumatoid arthritis;ko05150//Staphylococcu…	K06752;K06752;K06752;K06752;K06752;K06752;K06752;K06752;K06752;K06752;K06752;K06752;K06752;K06752;K06752;K06752;K06752;K06752;K06752;K06752;K06752;K06752;K06752;K06752	GO:0016020//membrane;GO:0016021//integral component of membrane	-	-
ENSMUST00000026262	209942.546875	182671.96875	184796.796875	120786.5625	144625.96875	88946.7421875	192470.4375	118119.7578125	-0.704386568505217	0.000155618603474295	0.00572248596662618	Hexa	hexosaminidase A [Source:MGI Symbol;Acc:MGI:96073]	Metabolism;Cellular Processes;Metabolism;Metabolism;Metabolism;Metabolism;Metabolism;Metabolism	Global and overview maps;Transport and catabolism;Carbohydrate metabolism;Glycan biosynthesis and metabolism;Glycan biosynthesis and metabolism;Glycan biosynthesis and metabolism;Glycan biosynthesis and metabolism;Glycan biosynthesis and metabolism	ko01100//Metabolic pathways;ko04142//Lysosome;ko00520//Amino sugar and nucleotide sugar metabolism;ko00513//Various types of N-glycan biosynthesis;ko00511//Other glycan degradation;ko00531//Glycosaminoglycan degradation;ko00604//Glycosphingolipid biosynthesis - ganglio series;ko00603//Glycosphingolipid biosynthesis - globo and isoglobo series	K12373;K12373;K12373;K12373;K12373;K12373;K12373;K12373	GO:0005764//lysosome;GO:0016020//membrane;GO:0042582//azurophil granule	GO:0004553//hydrolase activity, hydrolyzing O-glycosyl compounds;GO:0004563//beta-N-acetylhexosaminidase activity;GO:0008375//acetylglucosaminyltransferase activity;GO:0016787//hydrolase activity;GO:0016798//hydrolase activity, acting on glycosyl bonds;GO:0046982//protein heterodimerization activity;GO:0102148//N-acetyl-beta-D-galactosaminidase activity	GO:0001501//skeletal system development;GO:0005975//carbohydrate metabolic process;GO:0006024//glycosaminoglycan biosynthetic process;GO:0006689//ganglioside catabolic process;GO:0007040//lysosome organization;GO:0007605//sensory perception of sound;GO:0007626//locomotory behavior;GO:0007628//adult walking behavior;GO:0008152//metabolic process;GO:0019915//lipid storage;GO:0019953//sexual reprodu…
ENSMUST00000051672	533322.625	390119.8125	475027.5625	212991.390625	390386.875	141409.328125	466156.666666667	248262.53125	-0.908948358817366	0.000155750524412599	0.00572248596662618	Bst2	bone marrow stromal cell antigen 2 [Source:MGI Symbol;Acc:MGI:1916800]	Human Diseases;Human Diseases	Infectious disease: viral;Infectious diseases	ko05170//Human immunodeficiency virus 1 infection;ko05168//Herpes simplex infection	K06731;K06731	GO:0005737//cytoplasm;GO:0005768//endosome;GO:0005770//late endosome;GO:0005794//Golgi apparatus;GO:0005886//plasma membrane;GO:0009986//cell surface;GO:0016020//membrane;GO:0016021//integral component of membrane;GO:0016324//apical plasma membrane;GO:0031225//anchored component of membrane;GO:0045121//membrane raft	GO:0008191//metalloendopeptidase inhibitor activity	GO:0002376//immune system process;GO:0002737//negative regulation of plasmacytoid dendritic cell cytokine production;GO:0009615//response to virus;GO:0010951//negative regulation of endopeptidase activity;GO:0030308//negative regulation of cell growth;GO:0030336//negative regulation of cell migration;GO:0032956//regulation of actin cytoskeleton organization;GO:0034341//response to interferon-gamm…
ENSMUST00000077136	655977.3125	439840.5	767911	88187.1796875	76628.140625	133021.390625	621242.9375	99278.9036458333	-2.64559845698548	0.000156448761984247	0.00572248596662618	Sftpd	surfactant associated protein D [Source:MGI Symbol;Acc:MGI:109515]	Cellular Processes	Transport and catabolism	ko04145//Phagosome	K10068	GO:0005576//extracellular region;GO:0005581//collagen trimer;GO:0005615//extracellular space;GO:0005737//cytoplasm;GO:0005771//multivesicular body;GO:0005791//rough endoplasmic reticulum;GO:0031410//cytoplasmic vesicle;GO:0062023//collagen-containing extracellular matrix	GO:0001530//lipopolysaccharide binding;GO:0030246//carbohydrate binding;GO:0042802//identical protein binding;GO:0048029//monosaccharide binding	GO:0002376//immune system process;GO:0007585//respiratory gaseous exchange;GO:0008228//opsonization;GO:0032502//developmental process;GO:0032703//negative regulation of interleukin-2 production;GO:0042130//negative regulation of T cell proliferation;GO:0043129//surfactant homeostasis;GO:0043152//induction of bacterial agglutination;GO:0045087//innate immune response;GO:0048286//lung alveolus deve…
ENSMUST00000030768	108184.6640625	93208.390625	102426.484375	74166.9453125	69588.625	31870.330078125	101273.1796875	58541.966796875	-0.790709032880003	0.0001610358244202	0.00582097141801251	Kcnab2	potassium voltage-gated channel, shaker-related subfamily, beta member 2 [Source:MGI Symbol;Acc:MGI:109239]	-	-	-	-	GO:0005737//cytoplasm;GO:0016021//integral component of membrane	GO:0005249//voltage-gated potassium channel activity	GO:0006813//potassium ion transport;GO:0071805//potassium ion transmembrane transport
ENSMUST00000105648	108184.6640625	93208.390625	102426.484375	74166.9453125	69588.625	31870.330078125	101273.1796875	58541.966796875	-0.790709032880003	0.0001610358244202	0.00582097141801251	Kcnab2	potassium voltage-gated channel, shaker-related subfamily, beta member 2 [Source:MGI Symbol;Acc:MGI:109239]	-	-	-	-	GO:0005737//cytoplasm;GO:0005829//cytosol;GO:0005856//cytoskeleton;GO:0005874//microtubule;GO:0005886//plasma membrane;GO:0008076//voltage-gated potassium channel complex;GO:0014069//postsynaptic density;GO:0016020//membrane;GO:0016021//integral component of membrane;GO:0030054//cell junction;GO:0030424//axon;GO:0031234//extrinsic component of cytoplasmic side of plasma membrane;GO:0034705//potas…	GO:0004033//aldo-keto reductase (NADP) activity;GO:0005244//voltage-gated ion channel activity;GO:0005249//voltage-gated potassium channel activity;GO:0005515//protein binding;GO:0015459//potassium channel regulator activity;GO:0016491//oxidoreductase activity;GO:0044325//ion channel binding;GO:0044877//protein-containing complex binding	GO:0002244//hematopoietic progenitor cell differentiation;GO:0006811//ion transport;GO:0006813//potassium ion transport;GO:0034220//ion transmembrane transport;GO:0034765//regulation of ion transmembrane transport;GO:0050905//neuromuscular process;GO:0055114//oxidation-reduction process;GO:0070995//NADPH oxidation;GO:0071805//potassium ion transmembrane transport;GO:1901379//regulation of potassi…
ENSMUST00000159186	108184.6640625	93208.390625	102426.484375	74166.9453125	69588.625	31870.330078125	101273.1796875	58541.966796875	-0.790709032880003	0.0001610358244202	0.00582097141801251	Kcnab2	potassium voltage-gated channel, shaker-related subfamily, beta member 2 [Source:MGI Symbol;Acc:MGI:109239]	-	-	-	-	GO:0005737//cytoplasm;GO:0016021//integral component of membrane	GO:0005249//voltage-gated potassium channel activity	GO:0006813//potassium ion transport;GO:0055085//transmembrane transport;GO:0071805//potassium ion transmembrane transport
ENSMUST00000159840	108184.6640625	93208.390625	102426.484375	74166.9453125	69588.625	31870.330078125	101273.1796875	58541.966796875	-0.790709032880003	0.0001610358244202	0.00582097141801251	Kcnab2	potassium voltage-gated channel, shaker-related subfamily, beta member 2 [Source:MGI Symbol;Acc:MGI:109239]	-	-	-	-	GO:0005737//cytoplasm;GO:0016021//integral component of membrane	GO:0005249//voltage-gated potassium channel activity	GO:0006813//potassium ion transport;GO:0071805//potassium ion transmembrane transport
ENSMUST00000160884	108184.6640625	93208.390625	102426.484375	74166.9453125	69588.625	31870.330078125	101273.1796875	58541.966796875	-0.790709032880003	0.0001610358244202	0.00582097141801251	Kcnab2	potassium voltage-gated channel, shaker-related subfamily, beta member 2 [Source:MGI Symbol;Acc:MGI:109239]	-	-	-	-	GO:0005737//cytoplasm;GO:0005829//cytosol;GO:0005856//cytoskeleton;GO:0005874//microtubule;GO:0005886//plasma membrane;GO:0008076//voltage-gated potassium channel complex;GO:0014069//postsynaptic density;GO:0016020//membrane;GO:0016021//integral component of membrane;GO:0030054//cell junction;GO:0030424//axon;GO:0031234//extrinsic component of cytoplasmic side of plasma membrane;GO:0034705//potas…	GO:0004033//aldo-keto reductase (NADP) activity;GO:0005244//voltage-gated ion channel activity;GO:0005249//voltage-gated potassium channel activity;GO:0005515//protein binding;GO:0015459//potassium channel regulator activity;GO:0016491//oxidoreductase activity;GO:0044325//ion channel binding;GO:0044877//protein-containing complex binding	GO:0002244//hematopoietic progenitor cell differentiation;GO:0006811//ion transport;GO:0006813//potassium ion transport;GO:0034220//ion transmembrane transport;GO:0034765//regulation of ion transmembrane transport;GO:0050905//neuromuscular process;GO:0055114//oxidation-reduction process;GO:0070995//NADPH oxidation;GO:0071805//potassium ion transmembrane transport;GO:1901379//regulation of potassi…
ENSMUST00000238252	108184.6640625	93208.390625	102426.484375	74166.9453125	69588.625	31870.330078125	101273.1796875	58541.966796875	-0.790709032880003	0.0001610358244202	0.00582097141801251	Kcnab2	potassium voltage-gated channel, shaker-related subfamily, beta member 2 [Source:MGI Symbol;Acc:MGI:109239]	-	-	-	-	GO:0005737//cytoplasm;GO:0016021//integral component of membrane	GO:0005249//voltage-gated potassium channel activity	GO:0006813//potassium ion transport;GO:0055085//transmembrane transport
ENSMUST00000031355	510284.71875	466296.03125	468294.3125	251790.015625	321141.0625	282232.96875	481625.020833333	285054.682291667	-0.756671643999915	0.000165733992651471	0.00595576248446368	Uso1	USO1 vesicle docking factor [Source:MGI Symbol;Acc:MGI:1929095]	-	-	-	-	GO:0000139//Golgi membrane;GO:0001650//fibrillar center;GO:0005737//cytoplasm;GO:0005783//endoplasmic reticulum;GO:0005794//Golgi apparatus;GO:0005795//Golgi stack;GO:0005829//cytosol;GO:0012507//ER to Golgi transport vesicle membrane;GO:0016020//membrane;GO:0048471//perinuclear region of cytoplasm	GO:0005515//protein binding	GO:0006886//intracellular protein transport;GO:0006888//ER to Golgi vesicle-mediated transport;GO:0007030//Golgi organization;GO:0007264//small GTPase mediated signal transduction;GO:0015031//protein transport;GO:0016192//vesicle-mediated transport;GO:0032252//secretory granule localization;GO:0045056//transcytosis;GO:0048211//Golgi vesicle docking;GO:0048280//vesicle fusion with Golgi apparatus;…
ENSMUST00000172503	1852898.75	2068021.25	2098022	1119486.5	1360550.5	856787.5625	2006314	1112274.85416667	-0.851034077528125	0.000167757724520954	0.0059934373091934	H2-D1	histocompatibility 2, D region locus 1 [Source:MGI Symbol;Acc:MGI:95896]	Cellular Processes;Human Diseases;Human Diseases;Human Diseases;Human Diseases;Human Diseases;Human Diseases;Cellular Processes;Human Diseases;Human Diseases;Human Diseases;Environmental Information Processing;Cellular Processes;Human Diseases;Human Diseases;Organismal Systems;Human Diseases;Human Diseases	Transport and catabolism;Infectious diseases;Infectious diseases;Infectious disease: viral;Infectious diseases;Cancers;Infectious diseases;Transport and catabolism;Infectious diseases;Infectious diseases;Cardiovascular diseases;Signaling molecules and interaction;Cell growth and death;Immune diseases;Immune diseases;Immune system;Endocrine and metabolic diseases;Immune diseases	ko04144//Endocytosis;ko05165//Human papillomavirus infection;ko05169//Epstein-Barr virus infection;ko05170//Human immunodeficiency virus 1 infection;ko05163//Human cytomegalovirus infection;ko05203//Viral carcinogenesis;ko05168//Herpes simplex infection;ko04145//Phagosome;ko05167//Kaposi sarcoma-associated herpesvirus infection;ko05166//HTLV-I infection;ko05416//Viral myocarditis;ko04514//Cell ad…	K06751;K06751;K06751;K06751;K06751;K06751;K06751;K06751;K06751;K06751;K06751;K06751;K06751;K06751;K06751;K06751;K06751;K06751	GO:0016020//membrane;GO:0016021//integral component of membrane	-	GO:0006955//immune response;GO:0019882//antigen processing and presentation
ENSMUST00000062254	230614.546875	309265.1875	321179.28125	431455.21875	364124.09375	507479.40625	287019.671875	434352.90625	0.597718070283885	0.000195554314077004	0.00678915966103498	Clec14a	C-type lectin domain family 14, member a [Source:MGI Symbol;Acc:MGI:1914114]	-	-	-	-	GO:0009897//external side of plasma membrane;GO:0016020//membrane;GO:0016021//integral component of membrane;GO:0062023//collagen-containing extracellular matrix	GO:0030246//carbohydrate binding;GO:0050840//extracellular matrix binding;GO:1990430//extracellular matrix protein binding	GO:0002042//cell migration involved in sprouting angiogenesis;GO:0016477//cell migration
ENSMUST00000021539	92546.40625	64404.25	61444.5078125	21624.640625	24489.951171875	49304.5859375	72798.3880208333	31806.392578125	-1.19458975172467	0.000198416464887222	0.00683911628596718	Vrk1	vaccinia related kinase 1 [Source:MGI Symbol;Acc:MGI:1261847]	-	-	-	-	GO:0005634//nucleus;GO:0005654//nucleoplasm;GO:0005730//nucleolus;GO:0005737//cytoplasm;GO:0005795//Golgi stack;GO:0005819//spindle;GO:0005829//cytosol;GO:0005856//cytoskeleton	GO:0000166//nucleotide binding;GO:0004672//protein kinase activity;GO:0004674//protein serine/threonine kinase activity;GO:0005524//ATP binding;GO:0016301//kinase activity;GO:0016740//transferase activity;GO:0019901//protein kinase binding;GO:0031493//nucleosomal histone binding;GO:0035175//histone kinase activity (H3-S10 specific);GO:0072354//histone kinase activity (H3-T3 specific)	GO:0006468//protein phosphorylation;GO:0007049//cell cycle;GO:0016055//Wnt signaling pathway;GO:0016310//phosphorylation;GO:0018105//peptidyl-serine phosphorylation;GO:0043987//histone H3-S10 phosphorylation;GO:0046777//protein autophosphorylation;GO:0051301//cell division;GO:0072355//histone H3-T3 phosphorylation;GO:0090166//Golgi disassembly
ENSMUST00000072040	92546.40625	64404.25	61444.5078125	21624.640625	24489.951171875	49304.5859375	72798.3880208333	31806.392578125	-1.19458975172467	0.000198416464887222	0.00683911628596718	Vrk1	vaccinia related kinase 1 [Source:MGI Symbol;Acc:MGI:1261847]	-	-	-	-	GO:0005634//nucleus;GO:0005654//nucleoplasm;GO:0005730//nucleolus;GO:0005737//cytoplasm;GO:0005795//Golgi stack;GO:0005819//spindle;GO:0005829//cytosol;GO:0005856//cytoskeleton	GO:0000166//nucleotide binding;GO:0004672//protein kinase activity;GO:0004674//protein serine/threonine kinase activity;GO:0005524//ATP binding;GO:0016301//kinase activity;GO:0016740//transferase activity;GO:0019901//protein kinase binding;GO:0031493//nucleosomal histone binding;GO:0035175//histone kinase activity (H3-S10 specific);GO:0072354//histone kinase activity (H3-T3 specific)	GO:0006468//protein phosphorylation;GO:0007049//cell cycle;GO:0016055//Wnt signaling pathway;GO:0016310//phosphorylation;GO:0018105//peptidyl-serine phosphorylation;GO:0043987//histone H3-S10 phosphorylation;GO:0046777//protein autophosphorylation;GO:0051301//cell division;GO:0072355//histone H3-T3 phosphorylation;GO:0090166//Golgi disassembly
ENSMUST00000085026	92546.40625	64404.25	61444.5078125	21624.640625	24489.951171875	49304.5859375	72798.3880208333	31806.392578125	-1.19458975172467	0.000198416464887222	0.00683911628596718	Vrk1	vaccinia related kinase 1 [Source:MGI Symbol;Acc:MGI:1261847]	-	-	-	-	GO:0005634//nucleus;GO:0005654//nucleoplasm;GO:0005730//nucleolus;GO:0005737//cytoplasm;GO:0005795//Golgi stack;GO:0005819//spindle;GO:0005829//cytosol;GO:0005856//cytoskeleton	GO:0000166//nucleotide binding;GO:0004672//protein kinase activity;GO:0004674//protein serine/threonine kinase activity;GO:0005524//ATP binding;GO:0016301//kinase activity;GO:0016740//transferase activity;GO:0019901//protein kinase binding;GO:0031493//nucleosomal histone binding;GO:0035175//histone kinase activity (H3-S10 specific);GO:0072354//histone kinase activity (H3-T3 specific)	GO:0006468//protein phosphorylation;GO:0007049//cell cycle;GO:0016055//Wnt signaling pathway;GO:0016310//phosphorylation;GO:0018105//peptidyl-serine phosphorylation;GO:0043987//histone H3-S10 phosphorylation;GO:0046777//protein autophosphorylation;GO:0051301//cell division;GO:0072355//histone H3-T3 phosphorylation;GO:0090166//Golgi disassembly
ENSMUST00000220629	92546.40625	64404.25	61444.5078125	21624.640625	24489.951171875	49304.5859375	72798.3880208333	31806.392578125	-1.19458975172467	0.000198416464887222	0.00683911628596718	Vrk1	vaccinia related kinase 1 [Source:MGI Symbol;Acc:MGI:1261847]	-	-	-	-	GO:0005634//nucleus;GO:0005654//nucleoplasm;GO:0005730//nucleolus;GO:0005737//cytoplasm;GO:0005795//Golgi stack;GO:0005819//spindle;GO:0005829//cytosol;GO:0005856//cytoskeleton	GO:0000166//nucleotide binding;GO:0004672//protein kinase activity;GO:0004674//protein serine/threonine kinase activity;GO:0005524//ATP binding;GO:0016301//kinase activity;GO:0016740//transferase activity;GO:0019901//protein kinase binding;GO:0031493//nucleosomal histone binding;GO:0035175//histone kinase activity (H3-S10 specific);GO:0072354//histone kinase activity (H3-T3 specific)	GO:0006468//protein phosphorylation;GO:0007049//cell cycle;GO:0016055//Wnt signaling pathway;GO:0016310//phosphorylation;GO:0018105//peptidyl-serine phosphorylation;GO:0043987//histone H3-S10 phosphorylation;GO:0046777//protein autophosphorylation;GO:0051301//cell division;GO:0072355//histone H3-T3 phosphorylation;GO:0090166//Golgi disassembly
ENSMUST00000221312	92546.40625	64404.25	61444.5078125	21624.640625	24489.951171875	49304.5859375	72798.3880208333	31806.392578125	-1.19458975172467	0.000198416464887222	0.00683911628596718	Vrk1	vaccinia related kinase 1 [Source:MGI Symbol;Acc:MGI:1261847]	-	-	-	-	-	GO:0000166//nucleotide binding;GO:0004672//protein kinase activity;GO:0004674//protein serine/threonine kinase activity;GO:0005524//ATP binding	GO:0006468//protein phosphorylation
ENSMUST00000034121	501499.34375	480309.625	481901.9375	274602.125	326921.4375	223530.03125	487903.635416667	275017.864583333	-0.82707089683936	0.000203045994025858	0.00693176462938275	Man2b1	mannosidase 2, alpha B1 [Source:MGI Symbol;Acc:MGI:107286]	Cellular Processes;Metabolism	Transport and catabolism;Glycan biosynthesis and metabolism	ko04142//Lysosome;ko00511//Other glycan degradation	K12311;K12311	GO:0005615//extracellular space;GO:0005764//lysosome;GO:0005774//vacuolar membrane	GO:0003824//catalytic activity;GO:0004559//alpha-mannosidase activity;GO:0005537//mannose binding;GO:0016787//hydrolase activity;GO:0016798//hydrolase activity, acting on glycosyl bonds;GO:0030246//carbohydrate binding;GO:0046872//metal ion binding	GO:0005975//carbohydrate metabolic process;GO:0006013//mannose metabolic process;GO:0006464//cellular protein modification process;GO:0006517//protein deglycosylation;GO:0007611//learning or memory;GO:0008152//metabolic process
ENSMUST00000003569	30920060	41010460	45985976	58913484	55466732	85675752	39305498.6666667	66685322.6666667	0.762638108164307	0.000210045576078417	0.00713110533150206	Inmt	indolethylamine N-methyltransferase [Source:MGI Symbol;Acc:MGI:102963]	Metabolism;Metabolism;Metabolism	Global and overview maps;Amino acid metabolism;Metabolism of other amino acids	ko01100//Metabolic pathways;ko00380//Tryptophan metabolism;ko00450//Selenocompound metabolism	K00562;K00562;K00562	GO:0005737//cytoplasm;GO:0005829//cytosol	GO:0004790//thioether S-methyltransferase activity;GO:0008168//methyltransferase activity;GO:0008170//N-methyltransferase activity;GO:0016740//transferase activity;GO:0030748//amine N-methyltransferase activity;GO:0098615//dimethyl selenide methyltransferase activity;GO:0102707//S-adenosyl-L-methionine:beta-alanine N-methyltransferase activity	GO:0009308//amine metabolic process;GO:0009636//response to toxic substance;GO:0032259//methylation
ENSMUST00000037618	86176.875	41065.609375	71340.3828125	38157.6171875	22222.19140625	35924.16015625	66194.2890625	32101.3229166667	-1.04407400035155	0.000229943095797339	0.00776373804216841	Rbpj	recombination signal binding protein for immunoglobulin kappa J region [Source:MGI Symbol;Acc:MGI:96522]	Human Diseases;Human Diseases;Human Diseases;Human Diseases;Organismal Systems;Environmental Information Processing	Infectious diseases;Infectious diseases;Cancers;Neurodegenerative disease;Immune system;Signal transduction	ko05165//Human papillomavirus infection;ko05169//Epstein-Barr virus infection;ko05203//Viral carcinogenesis;ko05017//Spinocerebellar ataxia;ko04658//Th1 and Th2 cell differentiation;ko04330//Notch signaling pathway	K06053;K06053;K06053;K06053;K06053;K06053	GO:0002193//MAML1-RBP-Jkappa- ICN1 complex;GO:0005634//nucleus;GO:0005654//nucleoplasm;GO:0005667//transcription factor complex;GO:0005730//nucleolus;GO:0005737//cytoplasm;GO:0017053//transcriptional repressor complex;GO:0032991//protein-containing complex;GO:0032993//protein-DNA complex	GO:0000978//RNA polymerase II proximal promoter sequence-specific DNA binding;GO:0001103//RNA polymerase II repressing transcription factor binding;GO:0001228//DNA-binding transcription activator activity, RNA polymerase II-specific;GO:0003677//DNA binding;GO:0003682//chromatin binding;GO:0003700//DNA-binding transcription factor activity;GO:0005515//protein binding;GO:0008134//transcription fact…	GO:0000122//negative regulation of transcription by RNA polymerase II;GO:0001525//angiogenesis;GO:0001756//somitogenesis;GO:0001837//epithelial to mesenchymal transition;GO:0001947//heart looping;GO:0001974//blood vessel remodeling;GO:0002437//inflammatory response to antigenic stimulus;GO:0003139//secondary heart field specification;GO:0003151//outflow tract morphogenesis;GO:0003157//endocardium…
ENSMUST00000087360	86176.875	41065.609375	71340.3828125	38157.6171875	22222.19140625	35924.16015625	66194.2890625	32101.3229166667	-1.04407400035155	0.000229943095797339	0.00776373804216841	Rbpj	recombination signal binding protein for immunoglobulin kappa J region [Source:MGI Symbol;Acc:MGI:96522]	Human Diseases;Human Diseases;Human Diseases;Human Diseases;Organismal Systems;Environmental Information Processing	Infectious diseases;Infectious diseases;Cancers;Neurodegenerative disease;Immune system;Signal transduction	ko05165//Human papillomavirus infection;ko05169//Epstein-Barr virus infection;ko05203//Viral carcinogenesis;ko05017//Spinocerebellar ataxia;ko04658//Th1 and Th2 cell differentiation;ko04330//Notch signaling pathway	K06053;K06053;K06053;K06053;K06053;K06053	GO:0005634//nucleus	GO:0000978//RNA polymerase II proximal promoter sequence-specific DNA binding;GO:0001228//DNA-binding transcription activator activity, RNA polymerase II-specific;GO:0003677//DNA binding;GO:0003700//DNA-binding transcription factor activity	GO:0006355//regulation of transcription, DNA-templated;GO:0006357//regulation of transcription by RNA polymerase II;GO:0045944//positive regulation of transcription by RNA polymerase II
ENSMUST00000113865	86176.875	41065.609375	71340.3828125	38157.6171875	22222.19140625	35924.16015625	66194.2890625	32101.3229166667	-1.04407400035155	0.000229943095797339	0.00776373804216841	Rbpj	recombination signal binding protein for immunoglobulin kappa J region [Source:MGI Symbol;Acc:MGI:96522]	Human Diseases;Human Diseases;Human Diseases;Human Diseases;Organismal Systems;Environmental Information Processing	Infectious diseases;Infectious diseases;Cancers;Neurodegenerative disease;Immune system;Signal transduction	ko05165//Human papillomavirus infection;ko05169//Epstein-Barr virus infection;ko05203//Viral carcinogenesis;ko05017//Spinocerebellar ataxia;ko04658//Th1 and Th2 cell differentiation;ko04330//Notch signaling pathway	K06053;K06053;K06053;K06053;K06053;K06053	GO:0002193//MAML1-RBP-Jkappa- ICN1 complex;GO:0005634//nucleus;GO:0005654//nucleoplasm;GO:0005667//transcription factor complex;GO:0005730//nucleolus;GO:0005737//cytoplasm;GO:0017053//transcriptional repressor complex;GO:0032991//protein-containing complex;GO:0032993//protein-DNA complex	GO:0000978//RNA polymerase II proximal promoter sequence-specific DNA binding;GO:0001103//RNA polymerase II repressing transcription factor binding;GO:0001228//DNA-binding transcription activator activity, RNA polymerase II-specific;GO:0003677//DNA binding;GO:0003682//chromatin binding;GO:0003700//DNA-binding transcription factor activity;GO:0005515//protein binding;GO:0008134//transcription fact…	GO:0000122//negative regulation of transcription by RNA polymerase II;GO:0001525//angiogenesis;GO:0001756//somitogenesis;GO:0001837//epithelial to mesenchymal transition;GO:0001947//heart looping;GO:0001974//blood vessel remodeling;GO:0002437//inflammatory response to antigenic stimulus;GO:0003139//secondary heart field specification;GO:0003151//outflow tract morphogenesis;GO:0003157//endocardium…
ENSMUST00000201883	86176.875	41065.609375	71340.3828125	38157.6171875	22222.19140625	35924.16015625	66194.2890625	32101.3229166667	-1.04407400035155	0.000229943095797339	0.00776373804216841	Rbpj	recombination signal binding protein for immunoglobulin kappa J region [Source:MGI Symbol;Acc:MGI:96522]	Human Diseases;Human Diseases;Human Diseases;Human Diseases;Organismal Systems;Environmental Information Processing	Infectious diseases;Infectious diseases;Cancers;Neurodegenerative disease;Immune system;Signal transduction	ko05165//Human papillomavirus infection;ko05169//Epstein-Barr virus infection;ko05203//Viral carcinogenesis;ko05017//Spinocerebellar ataxia;ko04658//Th1 and Th2 cell differentiation;ko04330//Notch signaling pathway	K06053;K06053;K06053;K06053;K06053;K06053	GO:0005634//nucleus	GO:0000978//RNA polymerase II proximal promoter sequence-specific DNA binding;GO:0001228//DNA-binding transcription activator activity, RNA polymerase II-specific;GO:0003677//DNA binding;GO:0003700//DNA-binding transcription factor activity	GO:0006355//regulation of transcription, DNA-templated;GO:0006357//regulation of transcription by RNA polymerase II;GO:0045944//positive regulation of transcription by RNA polymerase II
ENSMUST00000201912	86176.875	41065.609375	71340.3828125	38157.6171875	22222.19140625	35924.16015625	66194.2890625	32101.3229166667	-1.04407400035155	0.000229943095797339	0.00776373804216841	Rbpj	recombination signal binding protein for immunoglobulin kappa J region [Source:MGI Symbol;Acc:MGI:96522]	Human Diseases;Human Diseases;Human Diseases;Human Diseases;Organismal Systems;Environmental Information Processing	Infectious diseases;Infectious diseases;Cancers;Neurodegenerative disease;Immune system;Signal transduction	ko05165//Human papillomavirus infection;ko05169//Epstein-Barr virus infection;ko05203//Viral carcinogenesis;ko05017//Spinocerebellar ataxia;ko04658//Th1 and Th2 cell differentiation;ko04330//Notch signaling pathway	K06053;K06053;K06053;K06053;K06053;K06053	GO:0005634//nucleus	GO:0000978//RNA polymerase II proximal promoter sequence-specific DNA binding;GO:0001228//DNA-binding transcription activator activity, RNA polymerase II-specific;GO:0003677//DNA binding;GO:0003700//DNA-binding transcription factor activity	GO:0006355//regulation of transcription, DNA-templated;GO:0006357//regulation of transcription by RNA polymerase II;GO:0045944//positive regulation of transcription by RNA polymerase II
ENSMUST00000079130	197054.015625	208756.1875	169905.265625	123865.328125	122255.171875	99151.1484375	191905.15625	115090.549479167	-0.737624102273112	0.00023369136862727	0.00784717737822171	Nmral1	NmrA-like family domain containing 1 [Source:MGI Symbol;Acc:MGI:1915074]	-	-	-	-	GO:0005634//nucleus;GO:0005654//nucleoplasm;GO:0005737//cytoplasm;GO:0048471//perinuclear region of cytoplasm	GO:0042802//identical protein binding	-
ENSMUST00000120056	197054.015625	208756.1875	169905.265625	123865.328125	122255.171875	99151.1484375	191905.15625	115090.549479167	-0.737624102273112	0.00023369136862727	0.00784717737822171	Nmral1	NmrA-like family domain containing 1 [Source:MGI Symbol;Acc:MGI:1915074]	-	-	-	-	-	-	-
ENSMUST00000029815	248539.96875	231960.140625	270781.9375	131624.71875	157519.40625	201589.640625	250427.348958333	163577.921875	-0.61441408562003	0.000236707495540778	0.00786252735188153	Cisd2	CDGSH iron sulfur domain 2 [Source:MGI Symbol;Acc:MGI:1914256]	-	-	-	-	GO:0005739//mitochondrion;GO:0005741//mitochondrial outer membrane;GO:0005783//endoplasmic reticulum;GO:0005789//endoplasmic reticulum membrane;GO:0016020//membrane;GO:0016021//integral component of membrane;GO:0032991//protein-containing complex;GO:0043231//intracellular membrane-bounded organelle;GO:0048471//perinuclear region of cytoplasm;GO:0097038//perinuclear endoplasmic reticulum	GO:0042803//protein homodimerization activity;GO:0046872//metal ion binding;GO:0051536//iron-sulfur cluster binding;GO:0051537//2 iron, 2 sulfur cluster binding	GO:0000422//autophagy of mitochondrion;GO:0006914//autophagy;GO:0010259//multicellular organism aging;GO:0010506//regulation of autophagy
ENSMUST00000110299	335425.3125	304472.28125	569539.1875	626251.6875	937488.0625	636272.9375	403145.59375	733337.5625	0.863176483971621	0.000250893434552581	0.00810607494218182	Tgm3	transglutaminase 3, E polypeptide [Source:MGI Symbol;Acc:MGI:98732]	-	-	-	-	GO:0001533//cornified envelope;GO:0005737//cytoplasm;GO:0031234//extrinsic component of cytoplasmic side of plasma membrane;GO:0032991//protein-containing complex;GO:0062023//collagen-containing extracellular matrix	GO:0003810//protein-glutamine gamma-glutamyltransferase activity;GO:0003824//catalytic activity;GO:0005198//structural molecule activity;GO:0005509//calcium ion binding;GO:0016740//transferase activity;GO:0016746//transferase activity, transferring acyl groups;GO:0046872//metal ion binding	GO:0008544//epidermis development;GO:0018149//peptide cross-linking;GO:0030216//keratinocyte differentiation;GO:0031424//keratinization;GO:0035315//hair cell differentiation;GO:0043163//cell envelope organization;GO:0043588//skin development
ENSMUST00000103410	5420805	5157369.5	6839970	1637564	1708279	1243071.25	5806048.16666667	1529638.08333333	-1.92436619294092	0.000254809631428943	0.00810607494218182	Igkc	immunoglobulin kappa constant [Source:MGI Symbol;Acc:MGI:96495]	-	-	-	-	-	-	-
ENSMUST00000103330	453084.90625	535581	241358.921875	79628.671875	128292.15625	90241.9765625	410008.276041667	99387.6015625	-2.04451523658536	0.000290925208865475	0.0091210990228487	Igkv10-94	immunoglobulin kappa variable 10-94 [Source:MGI Symbol;Acc:MGI:3646140]	-	-	-	-	GO:0005615//extracellular space	-	GO:0002377//immunoglobulin production;GO:0006955//immune response
ENSMUST00000046745	289164.5625	269301.6875	429658.125	128144.8359375	337554.03125	73013.8984375	329374.791666667	179570.921875	-0.875176392496962	0.000304402875865466	0.00939977724720246	Tgtp2	T cell specific GTPase 2 [Source:MGI Symbol;Acc:MGI:3710083]	Environmental Information Processing	Signal transduction	ko04668//TNF signaling pathway	K17072	GO:0005737//cytoplasm;GO:0005783//endoplasmic reticulum;GO:0005789//endoplasmic reticulum membrane;GO:0005794//Golgi apparatus;GO:0016020//membrane	GO:0000166//nucleotide binding;GO:0003924//GTPase activity;GO:0005525//GTP binding;GO:0016787//hydrolase activity	GO:0002376//immune system process;GO:0006952//defense response;GO:0006955//immune response;GO:0009615//response to virus;GO:0009617//response to bacterium;GO:0034341//response to interferon-gamma;GO:0035455//response to interferon-alpha;GO:0035458//cellular response to interferon-beta;GO:0045087//innate immune response
ENSMUST00000068063	289164.5625	269301.6875	429658.125	128144.8359375	337554.03125	73013.8984375	329374.791666667	179570.921875	-0.875176392496962	0.000304402875865466	0.00939977724720246	Tgtp1	T cell specific GTPase 1 [Source:MGI Symbol;Acc:MGI:98734]	Environmental Information Processing	Signal transduction	ko04668//TNF signaling pathway	K17072	GO:0005737//cytoplasm;GO:0005783//endoplasmic reticulum;GO:0005789//endoplasmic reticulum membrane;GO:0005794//Golgi apparatus;GO:0016020//membrane	GO:0000166//nucleotide binding;GO:0003924//GTPase activity;GO:0005525//GTP binding;GO:0016787//hydrolase activity	GO:0002376//immune system process;GO:0006952//defense response;GO:0006955//immune response;GO:0009615//response to virus;GO:0009617//response to bacterium;GO:0034341//response to interferon-gamma;GO:0035455//response to interferon-alpha;GO:0035458//cellular response to interferon-beta;GO:0045087//innate immune response
ENSMUST00000032228	1271400.75	1205332.75	1107616.5	2004040.25	2618696.75	1830521.375	1194783.33333333	2151086.125	0.848316270433378	0.000308332061830822	0.00942637074602189	Mug1	murinoglobulin 1 [Source:MGI Symbol;Acc:MGI:99837]	-	-	-	-	GO:0005576//extracellular region;GO:0005615//extracellular space	GO:0002020//protease binding;GO:0004866//endopeptidase inhibitor activity;GO:0004867//serine-type endopeptidase inhibitor activity;GO:0030414//peptidase inhibitor activity	GO:0007566//embryo implantation;GO:0010466//negative regulation of peptidase activity;GO:0010951//negative regulation of endopeptidase activity
ENSMUST00000079625	88798.484375	70175.4375	104754.5078125	73178.265625	34053.4375	66126.5546875	87909.4765625	57786.0859375	-0.605296540757193	0.000330640277080173	0.010008790653486	Tor3a	torsin family 3, member A [Source:MGI Symbol;Acc:MGI:1353652]	-	-	-	-	GO:0005635//nuclear envelope;GO:0005737//cytoplasm;GO:0005783//endoplasmic reticulum;GO:0005788//endoplasmic reticulum lumen	GO:0000166//nucleotide binding;GO:0005515//protein binding;GO:0005524//ATP binding;GO:0016887//ATPase activity	-
ENSMUST00000122242	88798.484375	70175.4375	104754.5078125	73178.265625	34053.4375	66126.5546875	87909.4765625	57786.0859375	-0.605296540757193	0.000330640277080173	0.010008790653486	Tor3a	torsin family 3, member A [Source:MGI Symbol;Acc:MGI:1353652]	-	-	-	-	GO:0005635//nuclear envelope;GO:0005737//cytoplasm;GO:0005783//endoplasmic reticulum;GO:0005788//endoplasmic reticulum lumen	GO:0000166//nucleotide binding;GO:0005515//protein binding;GO:0005524//ATP binding;GO:0016887//ATPase activity	-
ENSMUST00000188964	88798.484375	70175.4375	104754.5078125	73178.265625	34053.4375	66126.5546875	87909.4765625	57786.0859375	-0.605296540757193	0.000330640277080173	0.010008790653486	Tor3a	torsin family 3, member A [Source:MGI Symbol;Acc:MGI:1353652]	-	-	-	-	GO:0005635//nuclear envelope;GO:0005737//cytoplasm;GO:0005783//endoplasmic reticulum;GO:0005788//endoplasmic reticulum lumen	GO:0000166//nucleotide binding;GO:0005515//protein binding;GO:0005524//ATP binding;GO:0016887//ATPase activity	-
ENSMUST00000075418	140135.828125	131351.265625	124717.984375	50164.6015625	104106.546875	68720.0234375	132068.359375	74330.390625	-0.829260775641723	0.000358795643517333	0.010651204006831	Stard5	StAR-related lipid transfer (START) domain containing 5 [Source:MGI Symbol;Acc:MGI:2156765]	-	-	-	-	-	GO:0008289//lipid binding;GO:0015485//cholesterol binding;GO:0032052//bile acid binding;GO:0120020//intermembrane cholesterol transfer activity	GO:0006869//lipid transport;GO:0070508//cholesterol import
ENSMUST00000103397	772565.25	273119.375	313772.15625	232437.78125	243377.953125	65017.125	453152.260416667	180277.619791667	-1.32977557389885	0.000364878530839369	0.010779704673115	Igkv3-10	immunoglobulin kappa variable 3-10 [Source:MGI Symbol;Acc:MGI:1330821]	-	-	-	-	GO:0005615//extracellular space	-	GO:0002377//immunoglobulin production;GO:0006955//immune response
ENSMUST00000196940	772565.25	273119.375	313772.15625	232437.78125	243377.953125	65017.125	453152.260416667	180277.619791667	-1.32977557389885	0.000364878530839369	0.010779704673115	Igkv3-10	immunoglobulin kappa variable 3-10 [Source:MGI Symbol;Acc:MGI:1330821]	-	-	-	-	GO:0005615//extracellular space	-	GO:0002377//immunoglobulin production;GO:0006955//immune response
ENSMUST00000155534	124762.5390625	156653.671875	146744.546875	31213.00390625	89613.734375	NA	142720.252604167	60413.369140625	-1.24025032350011	0.000368584995845324	0.0108371043036819	Muc5ac	mucin 5, subtypes A and C, tracheobronchial/gastric [Source:MGI Symbol;Acc:MGI:104697]	Organismal Systems	Immune system	ko04657//IL-17 signaling pathway	K21125	GO:0005576//extracellular region;GO:0005615//extracellular space;GO:0005737//cytoplasm;GO:0070701//mucus layer	GO:0005515//protein binding	GO:0036438//maintenance of lens transparency;GO:0048015//phosphatidylinositol-mediated signaling
ENSMUST00000164375	1036855.125	2005921.75	1683336.5	2728057.5	2288937.25	2892220.25	1575371.125	2636405	0.742880273802078	0.000402031149025831	0.0116532142017157	Zyx	zyxin [Source:MGI Symbol;Acc:MGI:103072]	Cellular Processes	Cellular community - eukaryotes	ko04510//Focal adhesion	K06273	GO:0001725//stress fiber;GO:0005634//nucleus;GO:0005737//cytoplasm;GO:0005829//cytosol;GO:0005856//cytoskeleton;GO:0005912//adherens junction;GO:0005925//focal adhesion;GO:0030054//cell junction;GO:0045335//phagocytic vesicle	GO:0005515//protein binding;GO:0046872//metal ion binding	GO:0007155//cell adhesion;GO:0007160//cell-matrix adhesion;GO:0007165//signal transduction;GO:0007179//transforming growth factor beta receptor signaling pathway;GO:0007229//integrin-mediated signaling pathway;GO:0043149//stress fiber assembly;GO:0050727//regulation of inflammatory response;GO:0071346//cellular response to interferon-gamma
ENSMUST00000203652	1036855.125	2005921.75	1683336.5	2728057.5	2288937.25	2892220.25	1575371.125	2636405	0.742880273802078	0.000402031149025831	0.0116532142017157	Zyx	zyxin [Source:MGI Symbol;Acc:MGI:103072]	Cellular Processes	Cellular community - eukaryotes	ko04510//Focal adhesion	K06273	GO:0001725//stress fiber;GO:0005634//nucleus;GO:0005737//cytoplasm;GO:0005829//cytosol;GO:0005856//cytoskeleton;GO:0005912//adherens junction;GO:0005925//focal adhesion;GO:0030054//cell junction;GO:0045335//phagocytic vesicle	GO:0005515//protein binding;GO:0046872//metal ion binding	GO:0007155//cell adhesion;GO:0007160//cell-matrix adhesion;GO:0007165//signal transduction;GO:0007179//transforming growth factor beta receptor signaling pathway;GO:0007229//integrin-mediated signaling pathway;GO:0043149//stress fiber assembly;GO:0071346//cellular response to interferon-gamma
ENSMUST00000005824	640509.125	1681657.625	897817.125	1849136.5	1751607.375	1712390.375	1073327.95833333	1771044.75	0.722509703026207	0.000413696753367253	0.0119061888555289	Apoa2	apolipoprotein A-II [Source:MGI Symbol;Acc:MGI:88050]	Organismal Systems;Organismal Systems	Endocrine system;Digestive system	ko03320//PPAR signaling pathway;ko04979//Cholesterol metabolism	K08758;K08758	GO:0005576//extracellular region;GO:0005615//extracellular space;GO:0005829//cytosol;GO:0034361//very-low-density lipoprotein particle;GO:0034364//high-density lipoprotein particle;GO:0034366//spherical high-density lipoprotein particle;GO:0042627//chylomicron	GO:0005102//signaling receptor binding;GO:0005319//lipid transporter activity;GO:0005543//phospholipid binding;GO:0008035//high-density lipoprotein particle binding;GO:0008289//lipid binding;GO:0015485//cholesterol binding;GO:0031072//heat shock protein binding;GO:0031210//phosphatidylcholine binding;GO:0034190//apolipoprotein receptor binding;GO:0042803//protein homodimerization activity;GO:0046…	GO:0002740//negative regulation of cytokine secretion involved in immune response;GO:0006656//phosphatidylcholine biosynthetic process;GO:0006869//lipid transport;GO:0008203//cholesterol metabolic process;GO:0009395//phospholipid catabolic process;GO:0009749//response to glucose;GO:0010873//positive regulation of cholesterol esterification;GO:0010903//negative regulation of very-low-density lipop…
ENSMUST00000111319	640509.125	1681657.625	897817.125	1849136.5	1751607.375	1712390.375	1073327.95833333	1771044.75	0.722509703026207	0.000413696753367253	0.0119061888555289	Apoa2	apolipoprotein A-II [Source:MGI Symbol;Acc:MGI:88050]	Organismal Systems;Organismal Systems	Endocrine system;Digestive system	ko03320//PPAR signaling pathway;ko04979//Cholesterol metabolism	K08758;K08758	GO:0005576//extracellular region;GO:0005615//extracellular space;GO:0005829//cytosol;GO:0034361//very-low-density lipoprotein particle;GO:0034364//high-density lipoprotein particle;GO:0034366//spherical high-density lipoprotein particle;GO:0042627//chylomicron	GO:0005102//signaling receptor binding;GO:0005319//lipid transporter activity;GO:0005543//phospholipid binding;GO:0008035//high-density lipoprotein particle binding;GO:0008289//lipid binding;GO:0015485//cholesterol binding;GO:0031072//heat shock protein binding;GO:0031210//phosphatidylcholine binding;GO:0034190//apolipoprotein receptor binding;GO:0042803//protein homodimerization activity;GO:0046…	GO:0002740//negative regulation of cytokine secretion involved in immune response;GO:0006656//phosphatidylcholine biosynthetic process;GO:0006869//lipid transport;GO:0008203//cholesterol metabolic process;GO:0009395//phospholipid catabolic process;GO:0009749//response to glucose;GO:0010873//positive regulation of cholesterol esterification;GO:0010903//negative regulation of very-low-density lipop…
ENSMUST00000111320	640509.125	1681657.625	897817.125	1849136.5	1751607.375	1712390.375	1073327.95833333	1771044.75	0.722509703026207	0.000413696753367253	0.0119061888555289	Apoa2	apolipoprotein A-II [Source:MGI Symbol;Acc:MGI:88050]	Organismal Systems;Organismal Systems	Endocrine system;Digestive system	ko03320//PPAR signaling pathway;ko04979//Cholesterol metabolism	K08758;K08758	GO:0005576//extracellular region;GO:0005615//extracellular space;GO:0005829//cytosol;GO:0034361//very-low-density lipoprotein particle;GO:0034364//high-density lipoprotein particle;GO:0034366//spherical high-density lipoprotein particle;GO:0042627//chylomicron	GO:0005102//signaling receptor binding;GO:0005319//lipid transporter activity;GO:0005543//phospholipid binding;GO:0008035//high-density lipoprotein particle binding;GO:0008289//lipid binding;GO:0015485//cholesterol binding;GO:0031072//heat shock protein binding;GO:0031210//phosphatidylcholine binding;GO:0034190//apolipoprotein receptor binding;GO:0042803//protein homodimerization activity;GO:0046…	GO:0002740//negative regulation of cytokine secretion involved in immune response;GO:0006656//phosphatidylcholine biosynthetic process;GO:0006869//lipid transport;GO:0008203//cholesterol metabolic process;GO:0009395//phospholipid catabolic process;GO:0009749//response to glucose;GO:0010873//positive regulation of cholesterol esterification;GO:0010903//negative regulation of very-low-density lipop…
ENSMUST00000111321	640509.125	1681657.625	897817.125	1849136.5	1751607.375	1712390.375	1073327.95833333	1771044.75	0.722509703026207	0.000413696753367253	0.0119061888555289	Apoa2	apolipoprotein A-II [Source:MGI Symbol;Acc:MGI:88050]	Organismal Systems;Organismal Systems	Endocrine system;Digestive system	ko03320//PPAR signaling pathway;ko04979//Cholesterol metabolism	K08758;K08758	GO:0005576//extracellular region;GO:0005615//extracellular space;GO:0005829//cytosol;GO:0034361//very-low-density lipoprotein particle;GO:0034364//high-density lipoprotein particle;GO:0034366//spherical high-density lipoprotein particle;GO:0042627//chylomicron	GO:0005102//signaling receptor binding;GO:0005319//lipid transporter activity;GO:0005543//phospholipid binding;GO:0008035//high-density lipoprotein particle binding;GO:0008289//lipid binding;GO:0015485//cholesterol binding;GO:0031072//heat shock protein binding;GO:0031210//phosphatidylcholine binding;GO:0034190//apolipoprotein receptor binding;GO:0042803//protein homodimerization activity;GO:0046…	GO:0002740//negative regulation of cytokine secretion involved in immune response;GO:0006656//phosphatidylcholine biosynthetic process;GO:0006869//lipid transport;GO:0008203//cholesterol metabolic process;GO:0009395//phospholipid catabolic process;GO:0009749//response to glucose;GO:0010873//positive regulation of cholesterol esterification;GO:0010903//negative regulation of very-low-density lipop…
ENSMUST00000042470	11363956	5434000	9678967	24120384	18131606	18413612	8825641	20221867.3333333	1.19614325592979	0.000415915372097764	0.0119061888555289	Zkscan2	zinc finger with KRAB and SCAN domains 2 [Source:MGI Symbol;Acc:MGI:2444060]	-	-	-	-	GO:0005634//nucleus	GO:0003676//nucleic acid binding;GO:0003700//DNA-binding transcription factor activity;GO:0046872//metal ion binding	GO:0006355//regulation of transcription, DNA-templated
ENSMUST00000029018	237706.921875	214299.578125	264751.75	36096.9921875	88439.1953125	9343.5478515625	238919.416666667	44626.5784505208	-2.42054900093334	0.00041850883527978	0.0119061888555289	Zbp1	Z-DNA binding protein 1 [Source:MGI Symbol;Acc:MGI:1927449]	Cellular Processes;Organismal Systems	Cell growth and death;Immune system	ko04217//Necroptosis;ko04623//Cytosolic DNA-sensing pathway	K12965;K12965	-	GO:0003677//DNA binding;GO:0005515//protein binding	GO:0060340//positive regulation of type I interferon-mediated signaling pathway
ENSMUST00000023797	865348.9375	2864.16967773438	2222289.25	2348062	2729426.5	1557676.875	1030167.45239258	2211721.79166667	1.10229105839284	0.000422832504127127	0.0119188336599137	Krt4	keratin 4 [Source:MGI Symbol;Acc:MGI:96701]	-	-	-	-	GO:0005882//intermediate filament;GO:0009986//cell surface;GO:0045095//keratin filament;GO:0045111//intermediate filament cytoskeleton	-	GO:0007010//cytoskeleton organization;GO:0030855//epithelial cell differentiation;GO:0050680//negative regulation of epithelial cell proliferation
ENSMUST00000103381	626575.1875	602458.8125	621884.3125	133281.25	244418.953125	65677.5	616972.770833333	147792.567708333	-2.06163309950726	0.000432357821649313	0.0120765400637956	Igkv8-27	immunoglobulin kappa chain variable 8-27 [Source:MGI Symbol;Acc:MGI:4439868]	-	-	-	-	GO:0005615//extracellular space	-	GO:0002377//immunoglobulin production;GO:0006955//immune response
ENSMUST00000026050	2560469.75	2001282.375	2144933.5	1263854.25	1481837	873600.1875	2235561.875	1206430.47916667	-0.889892694461596	0.000439461168519813	0.0121167188688149	Gsto1	glutathione S-transferase omega 1 [Source:MGI Symbol;Acc:MGI:1342273]	Metabolism;Human Diseases;Human Diseases;Human Diseases;Human Diseases;Metabolism;Human Diseases;Metabolism;Metabolism;Metabolism	Global and overview maps;Cancers;Cancers;Cardiovascular diseases;Drug resistance;Xenobiotics biodegradation and metabolism;Cancers;Metabolism of other amino acids;Xenobiotics biodegradation and metabolism;Xenobiotics biodegradation and metabolism	ko01100//Metabolic pathways;ko05200//Pathways in cancer;ko05225//Hepatocellular carcinoma;ko05418//Fluid shear stress and atherosclerosis;ko01524//Platinum drug resistance;ko00983//Drug metabolism - other enzymes;ko05204//Chemical carcinogenesis;ko00480//Glutathione metabolism;ko00980//Metabolism of xenobiotics by cytochrome P450;ko00982//Drug metabolism - cytochrome P450	K00799;K00799;K00799;K00799;K00799;K00799;K00799;K00799;K00799;K00799	GO:0005604//basement membrane;GO:0005623//cell;GO:0005654//nucleoplasm;GO:0005737//cytoplasm;GO:0005829//cytosol;GO:0030424//axon;GO:0031965//nuclear membrane;GO:0043209//myelin sheath;GO:0044297//cell body	GO:0004364//glutathione transferase activity;GO:0005515//protein binding;GO:0016491//oxidoreductase activity;GO:0016740//transferase activity;GO:0045174//glutathione dehydrogenase (ascorbate) activity;GO:0050610//methylarsonate reductase activity	GO:0010880//regulation of release of sequestered calcium ion into cytosol by sarcoplasmic reticulum;GO:0019852//L-ascorbic acid metabolic process;GO:0019853//L-ascorbic acid biosynthetic process;GO:0042178//xenobiotic catabolic process;GO:0055114//oxidation-reduction process;GO:0060315//negative regulation of ryanodine-sensitive calcium-release channel activity;GO:0060316//positive regulation of …
ENSMUST00000076648	114769.9765625	52382.3203125	208330.890625	36095.5703125	50213.29296875	23896.529296875	125161.0625	36735.130859375	-1.76855349189918	0.000439711685556669	0.0121167188688149	Fcgbp	Fc fragment of IgG binding protein [Source:MGI Symbol;Acc:MGI:2444336]	-	-	-	-	GO:0031012//extracellular matrix	GO:0005515//protein binding	GO:0008150//biological_process
ENSMUST00000030412	341362.65625	401176.71875	472732.96875	282263.5	257738.65625	227680.84375	405090.78125	255894.333333333	-0.662697053745543	0.000467938893838922	0.012723382755045	Ppt1	palmitoyl-protein thioesterase 1 [Source:MGI Symbol;Acc:MGI:1298204]	Metabolism;Cellular Processes;Metabolism;Metabolism	Global and overview maps;Transport and catabolism;Global and overview maps;Lipid metabolism	ko01100//Metabolic pathways;ko04142//Lysosome;ko01212//Fatty acid metabolism;ko00062//Fatty acid elongation	K01074;K01074;K01074;K01074	GO:0005576//extracellular region;GO:0005615//extracellular space;GO:0005623//cell;GO:0005634//nucleus;GO:0005764//lysosome;GO:0005794//Golgi apparatus;GO:0005829//cytosol;GO:0008021//synaptic vesicle;GO:0030424//axon;GO:0030425//dendrite;GO:0043005//neuron projection;GO:0043025//neuronal cell body;GO:0043231//intracellular membrane-bounded organelle;GO:0045121//membrane raft;GO:0045202//synapse	GO:0005515//protein binding;GO:0008474//palmitoyl-(protein) hydrolase activity;GO:0016290//palmitoyl-CoA hydrolase activity;GO:0016787//hydrolase activity;GO:0016790//thiolester hydrolase activity;GO:0035727//lysophosphatidic acid binding;GO:0098599//palmitoyl hydrolase activity;GO:0120146//sulfatide binding	GO:0002084//protein depalmitoylation;GO:0006898//receptor-mediated endocytosis;GO:0006907//pinocytosis;GO:0007040//lysosome organization;GO:0007042//lysosomal lumen acidification;GO:0007269//neurotransmitter secretion;GO:0007399//nervous system development;GO:0007420//brain development;GO:0007601//visual perception;GO:0007625//grooming behavior;GO:0008306//associative learning;GO:0008344//adult l…
ENSMUST00000134042	571136.8125	357111.5	541203.375	287436.9375	393387.53125	178312.9375	489817.229166667	286379.135416667	-0.774317134427432	0.000482558981992745	0.0130631054816979	H2-Ea	histocompatibility 2, class II antigen E alpha [Source:MGI Symbol;Acc:MGI:95900]	Human Diseases;Human Diseases;Human Diseases;Cellular Processes;Human Diseases;Human Diseases;Human Diseases;Human Diseases;Human Diseases;Organismal Systems;Human Diseases;Environmental Information Processing;Human Diseases;Human Diseases;Organismal Systems;Human Diseases;Human Diseases;Organismal Systems;Human Diseases;Organismal Systems;Organismal Systems;Human Diseases;Human Diseases;Human Di…	Infectious diseases;Infectious diseases;Infectious diseases;Transport and catabolism;Infectious diseases;Immune diseases;Infectious diseases;Cardiovascular diseases;Infectious diseases;Immune system;Infectious diseases;Signaling molecules and interaction;Immune diseases;Infectious diseases;Immune system;Immune diseases;Immune diseases;Immune system;Immune diseases;Immune system;Immune system;Immu…	ko05169//Epstein-Barr virus infection;ko05152//Tuberculosis;ko05168//Herpes simplex infection;ko04145//Phagosome;ko05166//HTLV-I infection;ko05322//Systemic lupus erythematosus;ko05164//Influenza A;ko05416//Viral myocarditis;ko05145//Toxoplasmosis;ko04640//Hematopoietic cell lineage;ko05140//Leishmaniasis;ko04514//Cell adhesion molecules (CAMs);ko05323//Rheumatoid arthritis;ko05150//Staphylococcu…	K06752;K06752;K06752;K06752;K06752;K06752;K06752;K06752;K06752;K06752;K06752;K06752;K06752;K06752;K06752;K06752;K06752;K06752;K06752;K06752;K06752;K06752;K06752;K06752	GO:0016020//membrane;GO:0016021//integral component of membrane;GO:0042613//MHC class II protein complex	-	GO:0006955//immune response;GO:0019882//antigen processing and presentation
ENSMUST00000235482	571136.8125	357111.5	541203.375	287436.9375	393387.53125	178312.9375	489817.229166667	286379.135416667	-0.774317134427432	0.000482558981992745	0.0130631054816979	H2-Ea	histocompatibility 2, class II antigen E alpha [Source:MGI Symbol;Acc:MGI:95900]	Human Diseases;Human Diseases;Human Diseases;Cellular Processes;Human Diseases;Human Diseases;Human Diseases;Human Diseases;Human Diseases;Organismal Systems;Human Diseases;Environmental Information Processing;Human Diseases;Human Diseases;Organismal Systems;Human Diseases;Human Diseases;Organismal Systems;Human Diseases;Organismal Systems;Organismal Systems;Human Diseases;Human Diseases;Human Di…	Infectious diseases;Infectious diseases;Infectious diseases;Transport and catabolism;Infectious diseases;Immune diseases;Infectious diseases;Cardiovascular diseases;Infectious diseases;Immune system;Infectious diseases;Signaling molecules and interaction;Immune diseases;Infectious diseases;Immune system;Immune diseases;Immune diseases;Immune system;Immune diseases;Immune system;Immune system;Immu…	ko05169//Epstein-Barr virus infection;ko05152//Tuberculosis;ko05168//Herpes simplex infection;ko04145//Phagosome;ko05166//HTLV-I infection;ko05322//Systemic lupus erythematosus;ko05164//Influenza A;ko05416//Viral myocarditis;ko05145//Toxoplasmosis;ko04640//Hematopoietic cell lineage;ko05140//Leishmaniasis;ko04514//Cell adhesion molecules (CAMs);ko05323//Rheumatoid arthritis;ko05150//Staphylococcu…	K06752;K06752;K06752;K06752;K06752;K06752;K06752;K06752;K06752;K06752;K06752;K06752;K06752;K06752;K06752;K06752;K06752;K06752;K06752;K06752;K06752;K06752;K06752;K06752	GO:0005764//lysosome;GO:0005765//lysosomal membrane;GO:0005886//plasma membrane;GO:0009986//cell surface;GO:0016020//membrane;GO:0016021//integral component of membrane;GO:0031902//late endosome membrane;GO:0042613//MHC class II protein complex	GO:0030247//polysaccharide binding;GO:0042605//peptide antigen binding	GO:0002503//peptide antigen assembly with MHC class II protein complex;GO:0002504//antigen processing and presentation of peptide or polysaccharide antigen via MHC class II;GO:0006955//immune response;GO:0019882//antigen processing and presentation;GO:0050890//cognition
ENSMUST00000031319	828152.625	1077096.25	1162556.875	1705569.875	1473129.75	3520340.75	1022601.91666667	2233013.45833333	1.12674731109571	0.000501188642141728	0.0133904530693953	Ppbp	pro-platelet basic protein [Source:MGI Symbol;Acc:MGI:1888712]	Organismal Systems;Environmental Information Processing;Environmental Information Processing	Immune system;Signaling molecules and interaction;Signaling molecules and interaction	ko04062//Chemokine signaling pathway;ko04060//Cytokine-cytokine receptor interaction;ko04061//Viral protein interaction with cytokine and cytokine receptor	K10029;K10029;K10029	GO:0005576//extracellular region;GO:0005615//extracellular space	GO:0008009//chemokine activity;GO:0045236//CXCR chemokine receptor binding	GO:0002523//leukocyte migration involved in inflammatory response;GO:0006935//chemotaxis;GO:0006952//defense response;GO:0006954//inflammatory response;GO:0006955//immune response;GO:0030593//neutrophil chemotaxis;GO:0030595//leukocyte chemotaxis;GO:0061844//antimicrobial humoral immune response mediated by antimicrobial peptide;GO:0070098//chemokine-mediated signaling pathway;GO:0071222//cellula…
ENSMUST00000103351	141964.5625	157433.1875	119021.9296875	26008.26171875	53253.0390625	11427.615234375	139473.2265625	30229.638671875	-2.2059525672993	0.000504904567148329	0.0134313357797683	Igkv4-63	immunoglobulin kappa variable 4-63 [Source:MGI Symbol;Acc:MGI:3645235]	-	-	-	-	GO:0005615//extracellular space	-	GO:0002377//immunoglobulin production;GO:0006955//immune response
ENSMUST00000028844	93153.015625	63591.0703125	87284.390625	47926.01171875	35136.625	63442.640625	81342.8255208333	48835.0924479167	-0.736096877234764	0.000516027887058897	0.0136184257600119	Sppl2a	signal peptide peptidase like 2A [Source:MGI Symbol;Acc:MGI:1913802]	-	-	-	-	GO:0005764//lysosome;GO:0005765//lysosomal membrane;GO:0005768//endosome;GO:0005770//late endosome;GO:0005886//plasma membrane;GO:0016020//membrane;GO:0016021//integral component of membrane;GO:0030660//Golgi-associated vesicle membrane;GO:0031902//late endosome membrane;GO:0043231//intracellular membrane-bounded organelle;GO:0071458//integral component of cytoplasmic side of endoplasmic reticulu…	GO:0004190//aspartic-type endopeptidase activity;GO:0008233//peptidase activity;GO:0016787//hydrolase activity;GO:0042500//aspartic endopeptidase activity, intramembrane cleaving;GO:0042803//protein homodimerization activity	GO:0006508//proteolysis;GO:0006509//membrane protein ectodomain proteolysis;GO:0031293//membrane protein intracellular domain proteolysis;GO:0033619//membrane protein proteolysis;GO:0050776//regulation of immune response
ENSMUST00000041633	534864.1875	531603.375	609675.75	232938.03125	599620	166385.8125	558714.4375	332981.28125	-0.746670023260742	0.000585524105257553	0.0150545842125844	Tap1	transporter 1, ATP-binding cassette, sub-family B (MDR/TAP) [Source:MGI Symbol;Acc:MGI:98483]	Human Diseases;Human Diseases;Human Diseases;Human Diseases;Cellular Processes;Human Diseases;Organismal Systems;Environmental Information Processing	Infectious diseases;Infectious disease: viral;Infectious diseases;Infectious diseases;Transport and catabolism;Immune diseases;Immune system;Membrane transport	ko05169//Epstein-Barr virus infection;ko05170//Human immunodeficiency virus 1 infection;ko05163//Human cytomegalovirus infection;ko05168//Herpes simplex infection;ko04145//Phagosome;ko05340//Primary immunodeficiency;ko04612//Antigen processing and presentation;ko02010//ABC transporters	K05653;K05653;K05653;K05653;K05653;K05653;K05653;K05653	GO:0016020//membrane;GO:0016021//integral component of membrane;GO:0030176//integral component of endoplasmic reticulum membrane;GO:0042825//TAP complex	GO:0000166//nucleotide binding;GO:0005524//ATP binding;GO:0015433//peptide antigen-transporting ATPase activity;GO:0016887//ATPase activity;GO:0042287//MHC protein binding;GO:0042626//ATPase activity, coupled to transmembrane movement of substances;GO:0046979//TAP2 binding	GO:0002479//antigen processing and presentation of exogenous peptide antigen via MHC class I, TAP-dependent;GO:0015833//peptide transport;GO:0055085//transmembrane transport
ENSMUST00000170086	534864.1875	531603.375	609675.75	232938.03125	599620	166385.8125	558714.4375	332981.28125	-0.746670023260742	0.000585524105257553	0.0150545842125844	Tap1	transporter 1, ATP-binding cassette, sub-family B (MDR/TAP) [Source:MGI Symbol;Acc:MGI:98483]	Human Diseases;Human Diseases;Human Diseases;Human Diseases;Cellular Processes;Human Diseases;Organismal Systems;Environmental Information Processing	Infectious diseases;Infectious disease: viral;Infectious diseases;Infectious diseases;Transport and catabolism;Immune diseases;Immune system;Membrane transport	ko05169//Epstein-Barr virus infection;ko05170//Human immunodeficiency virus 1 infection;ko05163//Human cytomegalovirus infection;ko05168//Herpes simplex infection;ko04145//Phagosome;ko05340//Primary immunodeficiency;ko04612//Antigen processing and presentation;ko02010//ABC transporters	K05653;K05653;K05653;K05653;K05653;K05653;K05653;K05653	GO:0005739//mitochondrion;GO:0005783//endoplasmic reticulum;GO:0005789//endoplasmic reticulum membrane;GO:0016020//membrane;GO:0016021//integral component of membrane;GO:0030176//integral component of endoplasmic reticulum membrane;GO:0030670//phagocytic vesicle membrane;GO:0034451//centriolar satellite;GO:0042824//MHC class I peptide loading complex;GO:0042825//TAP complex;GO:0043231//intracellu…	GO:0000166//nucleotide binding;GO:0005524//ATP binding;GO:0015433//peptide antigen-transporting ATPase activity;GO:0015440//peptide-transporting ATPase activity;GO:0016887//ATPase activity;GO:0023029//MHC class Ib protein binding;GO:0042287//MHC protein binding;GO:0042288//MHC class I protein binding;GO:0042605//peptide antigen binding;GO:0042626//ATPase activity, coupled to transmembrane movemen…	GO:0002250//adaptive immune response;GO:0002376//immune system process;GO:0002479//antigen processing and presentation of exogenous peptide antigen via MHC class I, TAP-dependent;GO:0006952//defense response;GO:0015031//protein transport;GO:0015833//peptide transport;GO:0019885//antigen processing and presentation of endogenous peptide antigen via MHC class I;GO:0042270//protection from natural k…
ENSMUST00000043094	309656.875	170996.09375	111637.5546875	53851.125	46910.3984375	NA	197430.174479167	50380.76171875	-1.9703976628849	0.000589748126288558	0.0151000093168466	Itln1	intelectin 1 (galactofuranose binding) [Source:MGI Symbol;Acc:MGI:1333831]	-	-	-	-	GO:0005576//extracellular region;GO:0005886//plasma membrane;GO:0016020//membrane;GO:0031225//anchored component of membrane;GO:0031526//brush border membrane;GO:0043235//receptor complex;GO:0045121//membrane raft;GO:0062023//collagen-containing extracellular matrix	GO:0005509//calcium ion binding;GO:0030246//carbohydrate binding;GO:0042802//identical protein binding;GO:0046872//metal ion binding;GO:0070492//oligosaccharide binding	GO:0001934//positive regulation of protein phosphorylation;GO:0009624//response to nematode;GO:0046326//positive regulation of glucose import;GO:0070207//protein homotrimerization
ENSMUST00000043400	65707.9375	31107.947265625	194987.5625	156870.96875	478185.4375	242628.703125	97267.8157552083	292561.703125	1.58870650421371	0.000615423014008864	0.0154085637641551	Asprv1	aspartic peptidase, retroviral-like 1 [Source:MGI Symbol;Acc:MGI:1915105]	-	-	-	-	GO:0016020//membrane;GO:0016021//integral component of membrane	GO:0004190//aspartic-type endopeptidase activity;GO:0008233//peptidase activity;GO:0016787//hydrolase activity	GO:0006508//proteolysis;GO:0016485//protein processing;GO:0043588//skin development
ENSMUST00000103359	524815.6875	1246031.875	600718.3125	65711.5625	163486.890625	53303.22265625	790521.958333333	94167.2252604167	-3.06950861208572	0.000616844049793679	0.0154085637641551	Igkv4-55	immunoglobulin kappa variable 4-55 [Source:MGI Symbol;Acc:MGI:2686370]	-	-	-	-	-	-	-
ENSMUST00000058011	124094.1171875	131963.015625	225210.5625	69064.4375	99469.3984375	98886.53125	160422.565104167	89140.1223958333	-0.847730239156542	0.000632363095641261	0.0156688355754659	Mcm2	minichromosome maintenance complex component 2 [Source:MGI Symbol;Acc:MGI:105380]	Cellular Processes;Genetic Information Processing	Cell growth and death;Replication and repair	ko04110//Cell cycle;ko03030//DNA replication	K02540;K02540	GO:0000785//chromatin;GO:0005634//nucleus;GO:0005654//nucleoplasm;GO:0005664//nuclear origin of replication recognition complex;GO:0005737//cytoplasm;GO:0015630//microtubule cytoskeleton;GO:0042555//MCM complex	GO:0000166//nucleotide binding;GO:0003677//DNA binding;GO:0003678//DNA helicase activity;GO:0003688//DNA replication origin binding;GO:0003697//single-stranded DNA binding;GO:0004386//helicase activity;GO:0005524//ATP binding;GO:0016787//hydrolase activity;GO:0019899//enzyme binding;GO:0042393//histone binding;GO:0043138//3'-5' DNA helicase activity;GO:0046872//metal ion binding	GO:0000727//double-strand break repair via break-induced replication;GO:0006260//DNA replication;GO:0006267//pre-replicative complex assembly involved in nuclear cell cycle DNA replication;GO:0006268//DNA unwinding involved in DNA replication;GO:0006270//DNA replication initiation;GO:0006334//nucleosome assembly;GO:0006915//apoptotic process;GO:0007049//cell cycle;GO:0071353//cellular response to…
ENSMUST00000021607	458760.84375	471045.1875	474109.25	198992.515625	344168.53125	211641.234375	467971.760416667	251600.760416667	-0.895285191032883	0.000643831907191742	0.0158707964465194	Lgmn	legumain [Source:MGI Symbol;Acc:MGI:1330838]	Cellular Processes;Organismal Systems	Transport and catabolism;Immune system	ko04142//Lysosome;ko04612//Antigen processing and presentation	K01369;K01369	GO:0005576//extracellular region;GO:0005737//cytoplasm;GO:0005764//lysosome;GO:0005770//late endosome;GO:0045177//apical part of cell;GO:0048471//perinuclear region of cytoplasm	GO:0004197//cysteine-type endopeptidase activity;GO:0008233//peptidase activity;GO:0008234//cysteine-type peptidase activity;GO:0016787//hydrolase activity	GO:0003014//renal system process;GO:0006508//proteolysis;GO:0006624//vacuolar protein processing;GO:0007613//memory;GO:0008284//positive regulation of cell proliferation;GO:0008306//associative learning;GO:0010447//response to acidic pH;GO:0010629//negative regulation of gene expression;GO:0032801//receptor catabolic process;GO:0035729//cellular response to hepatocyte growth factor stimulus;GO:00…
ENSMUST00000110020	458760.84375	471045.1875	474109.25	198992.515625	344168.53125	211641.234375	467971.760416667	251600.760416667	-0.895285191032883	0.000643831907191742	0.0158707964465194	Lgmn	legumain [Source:MGI Symbol;Acc:MGI:1330838]	Cellular Processes;Organismal Systems	Transport and catabolism;Immune system	ko04142//Lysosome;ko04612//Antigen processing and presentation	K01369;K01369	GO:0005576//extracellular region;GO:0005737//cytoplasm;GO:0005764//lysosome;GO:0005770//late endosome;GO:0045177//apical part of cell;GO:0048471//perinuclear region of cytoplasm	GO:0004197//cysteine-type endopeptidase activity;GO:0008233//peptidase activity;GO:0008234//cysteine-type peptidase activity;GO:0016787//hydrolase activity	GO:0003014//renal system process;GO:0006508//proteolysis;GO:0006624//vacuolar protein processing;GO:0007613//memory;GO:0008284//positive regulation of cell proliferation;GO:0008306//associative learning;GO:0010447//response to acidic pH;GO:0010629//negative regulation of gene expression;GO:0032801//receptor catabolic process;GO:0035729//cellular response to hepatocyte growth factor stimulus;GO:00…
ENSMUST00000099466	244076.578125	352036.28125	311961.90625	522665	523766.8125	561934.75	302691.588541667	536122.1875	0.824713257642281	0.000653809212524124	0.016006604027732	Sorbs1	sorbin and SH3 domain containing 1 [Source:MGI Symbol;Acc:MGI:700014]	Organismal Systems;Cellular Processes;Organismal Systems	Endocrine system;Cellular community - eukaryotes;Endocrine system	ko04910//Insulin signaling pathway;ko04520//Adherens junction;ko03320//PPAR signaling pathway	K06086;K06086;K06086	-	GO:0005515//protein binding	-
ENSMUST00000032473	392483.03125	397572.21875	506252.0625	150832.375	493868.84375	105698.15625	432102.4375	250133.125	-0.788677243700594	0.000664534924627472	0.0162046313961739	Iigp1	interferon inducible GTPase 1 [Source:MGI Symbol;Acc:MGI:1926259]	Environmental Information Processing	Signal transduction	ko04668//TNF signaling pathway	K17072	GO:0005634//nucleus;GO:0005737//cytoplasm;GO:0005783//endoplasmic reticulum;GO:0005789//endoplasmic reticulum membrane;GO:0005794//Golgi apparatus;GO:0016020//membrane;GO:0020005//symbiont-containing vacuole membrane;GO:0031965//nuclear membrane;GO:0032580//Golgi cisterna membrane	GO:0000166//nucleotide binding;GO:0003924//GTPase activity;GO:0005515//protein binding;GO:0005525//GTP binding;GO:0016787//hydrolase activity;GO:0019003//GDP binding;GO:0042802//identical protein binding	GO:0002376//immune system process;GO:0006952//defense response;GO:0009617//response to bacterium;GO:0010506//regulation of autophagy;GO:0019221//cytokine-mediated signaling pathway;GO:0035458//cellular response to interferon-beta;GO:0042832//defense response to protozoan;GO:0045087//innate immune response;GO:0050829//defense response to Gram-negative bacterium
ENSMUST00000066912	392483.03125	397572.21875	506252.0625	150832.375	493868.84375	105698.15625	432102.4375	250133.125	-0.788677243700594	0.000664534924627472	0.0162046313961739	Iigp1	interferon inducible GTPase 1 [Source:MGI Symbol;Acc:MGI:1926259]	Environmental Information Processing	Signal transduction	ko04668//TNF signaling pathway	K17072	GO:0005634//nucleus;GO:0005737//cytoplasm;GO:0005783//endoplasmic reticulum;GO:0005789//endoplasmic reticulum membrane;GO:0005794//Golgi apparatus;GO:0016020//membrane;GO:0020005//symbiont-containing vacuole membrane;GO:0031965//nuclear membrane;GO:0032580//Golgi cisterna membrane	GO:0000166//nucleotide binding;GO:0003924//GTPase activity;GO:0005515//protein binding;GO:0005525//GTP binding;GO:0016787//hydrolase activity;GO:0019003//GDP binding;GO:0042802//identical protein binding	GO:0002376//immune system process;GO:0006952//defense response;GO:0009617//response to bacterium;GO:0010506//regulation of autophagy;GO:0019221//cytokine-mediated signaling pathway;GO:0035458//cellular response to interferon-beta;GO:0042832//defense response to protozoan;GO:0045087//innate immune response;GO:0050829//defense response to Gram-negative bacterium
ENSMUST00000237185	392483.03125	397572.21875	506252.0625	150832.375	493868.84375	105698.15625	432102.4375	250133.125	-0.788677243700594	0.000664534924627472	0.0162046313961739	Iigp1	interferon inducible GTPase 1 [Source:MGI Symbol;Acc:MGI:1926259]	Environmental Information Processing	Signal transduction	ko04668//TNF signaling pathway	K17072	GO:0005634//nucleus;GO:0005737//cytoplasm;GO:0005783//endoplasmic reticulum;GO:0005789//endoplasmic reticulum membrane;GO:0005794//Golgi apparatus;GO:0016020//membrane;GO:0020005//symbiont-containing vacuole membrane;GO:0031965//nuclear membrane;GO:0032580//Golgi cisterna membrane	GO:0000166//nucleotide binding;GO:0003924//GTPase activity;GO:0005515//protein binding;GO:0005525//GTP binding;GO:0016787//hydrolase activity;GO:0019003//GDP binding;GO:0042802//identical protein binding	GO:0002376//immune system process;GO:0006952//defense response;GO:0009617//response to bacterium;GO:0010506//regulation of autophagy;GO:0019221//cytokine-mediated signaling pathway;GO:0035458//cellular response to interferon-beta;GO:0042832//defense response to protozoan;GO:0045087//innate immune response;GO:0050829//defense response to Gram-negative bacterium
ENSMUST00000103329	822539.0625	1370620.75	932744.625	331376.53125	305000.9375	118604.8359375	1041968.14583333	251660.768229167	-2.04975893817313	0.000674062822240351	0.0163075434750668	Igkv10-95	immunoglobulin kappa variable 10-95 [Source:MGI Symbol;Acc:MGI:3644598]	-	-	-	-	GO:0005615//extracellular space	-	GO:0002377//immunoglobulin production;GO:0006955//immune response
ENSMUST00000015667	347730.34375	408093.375	403461.25	158651.515625	370609.84375	168529.9375	386428.322916667	232597.098958333	-0.732367736016983	0.000705206523434603	0.0169940944568848	Ctss	cathepsin S [Source:MGI Symbol;Acc:MGI:107341]	Human Diseases;Cellular Processes;Cellular Processes;Cellular Processes;Organismal Systems	Infectious diseases;Transport and catabolism;Cell growth and death;Transport and catabolism;Immune system	ko05152//Tuberculosis;ko04145//Phagosome;ko04210//Apoptosis;ko04142//Lysosome;ko04612//Antigen processing and presentation	K01368;K01368;K01368;K01368;K01368	GO:0005615//extracellular space;GO:0005764//lysosome;GO:0005770//late endosome;GO:0043231//intracellular membrane-bounded organelle	GO:0001968//fibronectin binding;GO:0004197//cysteine-type endopeptidase activity;GO:0005518//collagen binding;GO:0008233//peptidase activity;GO:0008234//cysteine-type peptidase activity;GO:0016787//hydrolase activity;GO:0043236//laminin binding;GO:0043394//proteoglycan binding	GO:0002250//adaptive immune response;GO:0006508//proteolysis;GO:0010447//response to acidic pH;GO:0016485//protein processing;GO:0030574//collagen catabolic process;GO:0034769//basement membrane disassembly;GO:0048002//antigen processing and presentation of peptide antigen;GO:0051603//proteolysis involved in cellular protein catabolic process;GO:0097067//cellular response to thyroid hormone stimu…
ENSMUST00000116304	347730.34375	408093.375	403461.25	158651.515625	370609.84375	168529.9375	386428.322916667	232597.098958333	-0.732367736016983	0.000705206523434603	0.0169940944568848	Ctss	cathepsin S [Source:MGI Symbol;Acc:MGI:107341]	Human Diseases;Cellular Processes;Cellular Processes;Cellular Processes;Organismal Systems	Infectious diseases;Transport and catabolism;Cell growth and death;Transport and catabolism;Immune system	ko05152//Tuberculosis;ko04145//Phagosome;ko04210//Apoptosis;ko04142//Lysosome;ko04612//Antigen processing and presentation	K01368;K01368;K01368;K01368;K01368	GO:0005576//extracellular region;GO:0005615//extracellular space;GO:0005764//lysosome;GO:0005770//late endosome;GO:0009986//cell surface;GO:0016020//membrane;GO:0031905//early endosome lumen;GO:0043231//intracellular membrane-bounded organelle	GO:0001968//fibronectin binding;GO:0004197//cysteine-type endopeptidase activity;GO:0005518//collagen binding;GO:0008233//peptidase activity;GO:0008234//cysteine-type peptidase activity;GO:0016787//hydrolase activity;GO:0043236//laminin binding;GO:0043394//proteoglycan binding	GO:0006508//proteolysis;GO:0006955//immune response;GO:0010447//response to acidic pH;GO:0016485//protein processing;GO:0030574//collagen catabolic process;GO:0034769//basement membrane disassembly;GO:0045453//bone resorption;GO:0048002//antigen processing and presentation of peptide antigen;GO:0050729//positive regulation of inflammatory response;GO:0051603//proteolysis involved in cellular prot…
ENSMUST00000001963	2296984.5	3372566	3199837.75	4569306	3625919.25	5344780	2956462.75	4513335.08333333	0.610321792511945	0.000719336271379847	0.0172668804204264	Ace	angiotensin I converting enzyme (peptidyl-dipeptidase A) 1 [Source:MGI Symbol;Acc:MGI:87874]	Human Diseases;Human Diseases;Organismal Systems;Organismal Systems	Infectious diseases;Cardiovascular diseases;Endocrine system;Endocrine system	ko05142//Chagas disease (American trypanosomiasis);ko05410//Hypertrophic cardiomyopathy (HCM);ko04924//Renin secretion;ko04614//Renin-angiotensin system	K01283;K01283;K01283;K01283	GO:0005576//extracellular region;GO:0005615//extracellular space;GO:0005737//cytoplasm;GO:0005764//lysosome;GO:0005768//endosome;GO:0005886//plasma membrane;GO:0009897//external side of plasma membrane;GO:0009925//basal plasma membrane;GO:0016020//membrane;GO:0016021//integral component of membrane;GO:0031526//brush border membrane;GO:0031982//vesicle;GO:0070062//extracellular exosome;GO:0097225/…	GO:0003779//actin binding;GO:0004175//endopeptidase activity;GO:0004180//carboxypeptidase activity;GO:0005515//protein binding;GO:0008144//drug binding;GO:0008233//peptidase activity;GO:0008237//metallopeptidase activity;GO:0008238//exopeptidase activity;GO:0008239//dipeptidyl-peptidase activity;GO:0008240//tripeptidyl-peptidase activity;GO:0008241//peptidyl-dipeptidase activity;GO:0008270//zinc …	GO:0001822//kidney development;GO:0002446//neutrophil mediated immunity;GO:0003081//regulation of systemic arterial blood pressure by renin-angiotensin;GO:0003084//positive regulation of systemic arterial blood pressure;GO:0006508//proteolysis;GO:0006518//peptide metabolic process;GO:0007283//spermatogenesis;GO:0008217//regulation of blood pressure;GO:0009792//embryo development ending in birth o…
ENSMUST00000026890	201895.203125	151170.71875	219490.03125	612683.3125	304314.6875	270122.25	190851.984375	395706.75	1.05197748814859	0.000766966141129528	0.0181969379816253	Clec3b	C-type lectin domain family 3, member b [Source:MGI Symbol;Acc:MGI:104540]	-	-	-	-	GO:0001652//granular component;GO:0005615//extracellular space;GO:0005737//cytoplasm	GO:0005509//calcium ion binding;GO:0008201//heparin binding;GO:0030246//carbohydrate binding;GO:0036143//kringle domain binding	GO:0001503//ossification;GO:0030282//bone mineralization;GO:0071310//cellular response to organic substance;GO:0071560//cellular response to transforming growth factor beta stimulus
ENSMUST00000081933	144137.03125	123875.4453125	199643.359375	71575.1484375	72628.15625	69806.4609375	155885.278645833	71336.5885416667	-1.12777056052306	0.000773991024382399	0.0182929801724225	Dtx3l	deltex 3-like, E3 ubiquitin ligase [Source:MGI Symbol;Acc:MGI:2656973]	Environmental Information Processing	Signal transduction	ko04330//Notch signaling pathway	K06058	GO:0005634//nucleus;GO:0005654//nucleoplasm;GO:0005737//cytoplasm;GO:0005764//lysosome;GO:0005765//lysosomal membrane;GO:0005768//endosome;GO:0005769//early endosome;GO:0005829//cytosol;GO:0016020//membrane;GO:0031901//early endosome membrane;GO:0032991//protein-containing complex	GO:0004842//ubiquitin-protein transferase activity;GO:0004857//enzyme inhibitor activity;GO:0008047//enzyme activator activity;GO:0016740//transferase activity;GO:0019899//enzyme binding;GO:0042393//histone binding;GO:0044389//ubiquitin-like protein ligase binding;GO:0046872//metal ion binding;GO:0061630//ubiquitin protein ligase activity;GO:0097677//STAT family protein binding	GO:0002230//positive regulation of defense response to virus by host;GO:0002376//immune system process;GO:0006281//DNA repair;GO:0006302//double-strand break repair;GO:0006325//chromatin organization;GO:0006511//ubiquitin-dependent protein catabolic process;GO:0006974//cellular response to DNA damage stimulus;GO:0007219//Notch signaling pathway;GO:0008333//endosome to lysosome transport;GO:001039…
ENSMUST00000208710	4117586.75	1806543.875	6303785	6781638.5	11031470	5182486.5	4075971.875	7665198.33333333	0.911179024748538	0.000781461287901012	0.0183987724680142	Ckm	creatine kinase, muscle [Source:MGI Symbol;Acc:MGI:88413]	Metabolism;Metabolism	Global and overview maps;Amino acid metabolism	ko01100//Metabolic pathways;ko00330//Arginine and proline metabolism	K00933;K00933	GO:0005615//extracellular space;GO:0005737//cytoplasm	GO:0000166//nucleotide binding;GO:0003824//catalytic activity;GO:0004111//creatine kinase activity;GO:0005524//ATP binding;GO:0016301//kinase activity;GO:0016740//transferase activity;GO:0016772//transferase activity, transferring phosphorus-containing groups	GO:0006603//phosphocreatine metabolic process;GO:0009408//response to heat;GO:0016310//phosphorylation;GO:0046314//phosphocreatine biosynthetic process
ENSMUST00000102921	1576036.125	2506408	680529.4375	3105986.25	2657581	1930424.75	1587657.85416667	2564664	0.691869788701942	0.000794906575228616	0.0185730072425089	Myl7	myosin, light polypeptide 7, regulatory [Source:MGI Symbol;Acc:MGI:107495]	Cellular Processes;Cellular Processes;Organismal Systems	Cell motility;Cellular community - eukaryotes;Immune system	ko04810//Regulation of actin cytoskeleton;ko04510//Focal adhesion;ko04670//Leukocyte transendothelial migration	K12754;K12754;K12754	GO:0016459//myosin complex;GO:0031672//A band;GO:0043197//dendritic spine	GO:0005509//calcium ion binding;GO:0005515//protein binding;GO:0046872//metal ion binding	-
ENSMUST00000093955	230010.65625	59518.5	179549.375	49696.484375	114325.0859375	46264.89453125	156359.510416667	70095.48828125	-1.15747347966401	0.000812001137610745	0.0188243413647897	Supt4a	SPT4A, DSIF elongation factor subunit [Source:MGI Symbol;Acc:MGI:107416]	-	-	-	-	GO:0005634//nucleus;GO:0005654//nucleoplasm;GO:0032044//DSIF complex	GO:0000993//RNA polymerase II complex binding;GO:0003727//single-stranded RNA binding;GO:0008270//zinc ion binding;GO:0046872//metal ion binding;GO:0046982//protein heterodimerization activity	GO:0000122//negative regulation of transcription by RNA polymerase II;GO:0006325//chromatin organization;GO:0006355//regulation of transcription, DNA-templated;GO:0006368//transcription elongation from RNA polymerase II promoter;GO:0006397//mRNA processing;GO:0032785//negative regulation of DNA-templated transcription, elongation;GO:0032786//positive regulation of DNA-templated transcription, elo…
ENSMUST00000049572	298185.90625	358720.1875	219290.03125	180152.484375	217782.65625	170818.578125	292065.375	189584.572916667	-0.623449761144986	0.000814853507409936	0.0188243413647897	Lipa	lysosomal acid lipase A [Source:MGI Symbol;Acc:MGI:96789]	Cellular Processes;Organismal Systems;Metabolism	Transport and catabolism;Digestive system;Lipid metabolism	ko04142//Lysosome;ko04979//Cholesterol metabolism;ko00100//Steroid biosynthesis	K01052;K01052;K01052	GO:0001650//fibrillar center;GO:0005764//lysosome;GO:0043231//intracellular membrane-bounded organelle	GO:0004771//sterol esterase activity;GO:0016298//lipase activity;GO:0016787//hydrolase activity;GO:0016788//hydrolase activity, acting on ester bonds	GO:0000902//cell morphogenesis;GO:0001816//cytokine production;GO:0006629//lipid metabolic process;GO:0006631//fatty acid metabolic process;GO:0006954//inflammatory response;GO:0008283//cell proliferation;GO:0016042//lipid catabolic process;GO:0016125//sterol metabolic process;GO:0030324//lung development;GO:0048771//tissue remodeling;GO:0048873//homeostasis of number of cells within a tissue
ENSMUST00000178114	298185.90625	358720.1875	219290.03125	180152.484375	217782.65625	170818.578125	292065.375	189584.572916667	-0.623449761144986	0.000814853507409936	0.0188243413647897	Lipa	lysosomal acid lipase A [Source:MGI Symbol;Acc:MGI:96789]	Cellular Processes;Organismal Systems;Metabolism	Transport and catabolism;Digestive system;Lipid metabolism	ko04142//Lysosome;ko04979//Cholesterol metabolism;ko00100//Steroid biosynthesis	K01052;K01052;K01052	GO:0001650//fibrillar center;GO:0005764//lysosome;GO:0043231//intracellular membrane-bounded organelle	GO:0004771//sterol esterase activity;GO:0016298//lipase activity;GO:0016787//hydrolase activity;GO:0016788//hydrolase activity, acting on ester bonds	GO:0000902//cell morphogenesis;GO:0001816//cytokine production;GO:0006629//lipid metabolic process;GO:0006631//fatty acid metabolic process;GO:0006954//inflammatory response;GO:0008283//cell proliferation;GO:0016042//lipid catabolic process;GO:0016125//sterol metabolic process;GO:0030324//lung development;GO:0048771//tissue remodeling;GO:0048873//homeostasis of number of cells within a tissue
ENSMUST00000053871	391647.25	325242.84375	393899.75	171616.21875	234143.375	277659.75	370263.28125	227806.447916667	-0.700742903357723	0.000860794054730388	0.0197372368146203	Ckap4	cytoskeleton-associated protein 4 [Source:MGI Symbol;Acc:MGI:2444926]	Genetic Information Processing	Folding, sorting and degradation	ko04141//Protein processing in endoplasmic reticulum	K13999	GO:0005737//cytoplasm;GO:0005783//endoplasmic reticulum;GO:0005789//endoplasmic reticulum membrane;GO:0005791//rough endoplasmic reticulum;GO:0005811//lipid droplet;GO:0005829//cytosol;GO:0005856//cytoskeleton;GO:0005886//plasma membrane;GO:0009986//cell surface;GO:0016020//membrane;GO:0016021//integral component of membrane;GO:0016607//nuclear speck;GO:0036464//cytoplasmic ribonucleoprotein gran…	-	GO:0008150//biological_process
ENSMUST00000167671	391647.25	325242.84375	393899.75	171616.21875	234143.375	277659.75	370263.28125	227806.447916667	-0.700742903357723	0.000860794054730388	0.0197372368146203	Ckap4	cytoskeleton-associated protein 4 [Source:MGI Symbol;Acc:MGI:2444926]	Genetic Information Processing	Folding, sorting and degradation	ko04141//Protein processing in endoplasmic reticulum	K13999	GO:0005737//cytoplasm;GO:0005783//endoplasmic reticulum;GO:0005789//endoplasmic reticulum membrane;GO:0005791//rough endoplasmic reticulum;GO:0005811//lipid droplet;GO:0005829//cytosol;GO:0005856//cytoskeleton;GO:0005886//plasma membrane;GO:0009986//cell surface;GO:0016020//membrane;GO:0016021//integral component of membrane;GO:0016607//nuclear speck;GO:0036464//cytoplasmic ribonucleoprotein gran…	-	GO:0008150//biological_process
ENSMUST00000027754	222805.53125	172235.78125	167668.796875	86982.0546875	134494.578125	83429.4140625	187570.036458333	101635.348958333	-0.884027120326146	0.000897894072263044	0.020474041612653	Ncf2	neutrophil cytosolic factor 2 [Source:MGI Symbol;Acc:MGI:97284]	Cellular Processes;Human Diseases;Organismal Systems;Human Diseases;Organismal Systems	Transport and catabolism;Cardiovascular diseases;Immune system;Infectious diseases;Development	ko04145//Phagosome;ko05418//Fluid shear stress and atherosclerosis;ko04670//Leukocyte transendothelial migration;ko05140//Leishmaniasis;ko04380//Osteoclast differentiation	K08010;K08010;K08010;K08010;K08010	GO:0001669//acrosomal vesicle;GO:0005730//nucleolus;GO:0005737//cytoplasm;GO:0005829//cytosol;GO:0016020//membrane;GO:0043020//NADPH oxidase complex	GO:0005515//protein binding;GO:0008022//protein C-terminus binding;GO:0016175//superoxide-generating NADPH oxidase activity;GO:0016176//superoxide-generating NADPH oxidase activator activity;GO:0048365//Rac GTPase binding	GO:0006742//NADP catabolic process;GO:0006801//superoxide metabolic process;GO:0006909//phagocytosis;GO:0009749//response to glucose;GO:0014070//response to organic cyclic compound;GO:0032496//response to lipopolysaccharide;GO:0032870//cellular response to hormone stimulus;GO:0042554//superoxide anion generation;GO:0043085//positive regulation of catalytic activity;GO:0043525//positive regulation…
ENSMUST00000186568	222805.53125	172235.78125	167668.796875	86982.0546875	134494.578125	83429.4140625	187570.036458333	101635.348958333	-0.884027120326146	0.000897894072263044	0.020474041612653	Ncf2	neutrophil cytosolic factor 2 [Source:MGI Symbol;Acc:MGI:97284]	Cellular Processes;Human Diseases;Organismal Systems;Human Diseases;Organismal Systems	Transport and catabolism;Cardiovascular diseases;Immune system;Infectious diseases;Development	ko04145//Phagosome;ko05418//Fluid shear stress and atherosclerosis;ko04670//Leukocyte transendothelial migration;ko05140//Leishmaniasis;ko04380//Osteoclast differentiation	K08010;K08010;K08010;K08010;K08010	GO:0001669//acrosomal vesicle;GO:0005730//nucleolus;GO:0005737//cytoplasm;GO:0005829//cytosol;GO:0016020//membrane;GO:0043020//NADPH oxidase complex	GO:0005515//protein binding;GO:0008022//protein C-terminus binding;GO:0016175//superoxide-generating NADPH oxidase activity;GO:0016176//superoxide-generating NADPH oxidase activator activity;GO:0048365//Rac GTPase binding	GO:0006742//NADP catabolic process;GO:0006801//superoxide metabolic process;GO:0006909//phagocytosis;GO:0009749//response to glucose;GO:0014070//response to organic cyclic compound;GO:0032496//response to lipopolysaccharide;GO:0032870//cellular response to hormone stimulus;GO:0042554//superoxide anion generation;GO:0043085//positive regulation of catalytic activity;GO:0043525//positive regulation…
ENSMUST00000103378	418392	552314.625	120725.4921875	32085.7578125	103816.5546875	4588.14697265625	363810.705729167	46830.1531575521	-2.95767833581439	0.000910988933272085	0.020656926180653	Igkv8-30	immunoglobulin kappa chain variable 8-30 [Source:MGI Symbol;Acc:MGI:3642250]	-	-	-	-	GO:0005615//extracellular space	-	GO:0002377//immunoglobulin production;GO:0006955//immune response
ENSMUST00000087033	1554778.25	949410.875	973934.25	203296.6875	333629.15625	97277.4453125	1159374.45833333	211401.096354167	-2.45529184383711	0.000944389551303355	0.0211520165752895	Jchain	immunoglobulin joining chain [Source:MGI Symbol;Acc:MGI:96493]	-	-	-	-	GO:0005576//extracellular region;GO:0005615//extracellular space;GO:0071748//monomeric IgA immunoglobulin complex;GO:0071750//dimeric IgA immunoglobulin complex;GO:0071751//secretory IgA immunoglobulin complex;GO:0071752//secretory dimeric IgA immunoglobulin complex;GO:0071756//pentameric IgM immunoglobulin complex	GO:0003697//single-stranded DNA binding;GO:0003823//antigen binding;GO:0019862//IgA binding;GO:0030674//protein binding, bridging;GO:0031210//phosphatidylcholine binding;GO:0034987//immunoglobulin receptor binding;GO:0042803//protein homodimerization activity;GO:0042834//peptidoglycan binding	GO:0002250//adaptive immune response;GO:0003094//glomerular filtration;GO:0006959//humoral immune response;GO:0019731//antibacterial humoral response;GO:0045087//innate immune response;GO:0060267//positive regulation of respiratory burst;GO:0065003//protein-containing complex assembly
ENSMUST00000029041	2621540	1217310.75	299393.28125	3584539	2151153	701945.375	1379414.67708333	2145879.125	0.637512590602556	0.000958305818608769	0.0213361929541699	Fabp4	fatty acid binding protein 4, adipocyte [Source:MGI Symbol;Acc:MGI:88038]	Organismal Systems;Organismal Systems	Endocrine system;Endocrine system	ko03320//PPAR signaling pathway;ko04923//Regulation of lipolysis in adipocyte	K08753;K08753	GO:0005634//nucleus;GO:0005654//nucleoplasm;GO:0005737//cytoplasm;GO:0005829//cytosol	GO:0005324//long-chain fatty acid transporter activity;GO:0005504//fatty acid binding;GO:0008289//lipid binding;GO:0036041//long-chain fatty acid binding;GO:0051427//hormone receptor binding	GO:0001816//cytokine production;GO:0006469//negative regulation of protein kinase activity;GO:0006631//fatty acid metabolic process;GO:0008284//positive regulation of cell proliferation;GO:0009617//response to bacterium;GO:0015909//long-chain fatty acid transport;GO:0042632//cholesterol homeostasis;GO:0045892//negative regulation of transcription, DNA-templated;GO:0050727//regulation of inflammat…
ENSMUST00000081103	308740.6875	235639.3125	263457.125	90061.9140625	99026.640625	17141.416015625	269279.041666667	68743.3235677083	-1.96981043819803	0.000989378991286453	0.0219484978391886	Fcgr2b	Fc receptor, IgG, low affinity IIb [Source:MGI Symbol;Acc:MGI:95499]	Human Diseases;Cellular Processes;Organismal Systems;Organismal Systems;Human Diseases;Organismal Systems;Human Diseases	Infectious diseases;Transport and catabolism;Immune system;Immune system;Infectious diseases;Development;Infectious diseases	ko05152//Tuberculosis;ko04145//Phagosome;ko04666//Fc gamma R-mediated phagocytosis;ko04662//B cell receptor signaling pathway;ko05162//Measles;ko04380//Osteoclast differentiation;ko05150//Staphylococcus aureus infection	K12560;K12560;K12560;K12560;K12560;K12560;K12560	GO:0016020//membrane;GO:0016021//integral component of membrane	-	-
ENSMUST00000028467	3817407.75	941096	3743878.75	483001.1875	825586.375	453530.9375	2834127.5	587372.833333333	-2.27055621678129	0.000994624840705927	0.0219855023242371	Prg2	proteoglycan 2, bone marrow [Source:MGI Symbol;Acc:MGI:103294]	Human Diseases	Immune diseases	ko05310//Asthma	K10786	GO:0062023//collagen-containing extracellular matrix	GO:0030021//extracellular matrix structural constituent conferring compression resistance;GO:0030246//carbohydrate binding	GO:0002215//defense response to nematode;GO:0002376//immune system process;GO:0006955//immune response;GO:0032693//negative regulation of interleukin-10 production;GO:0032753//positive regulation of interleukin-4 production;GO:0042742//defense response to bacterium
ENSMUST00000110689	263607.25	180491.96875	343664.25	122911.015625	110498.625	104369.4609375	262587.822916667	112593.033854167	-1.22168244469813	0.00103170032755586	0.0226421375458242	C7	complement component 7 [Source:MGI Symbol;Acc:MGI:88235]	Human Diseases;Organismal Systems;Human Diseases	Immune diseases;Immune system;Neurodegenerative diseases	ko05322//Systemic lupus erythematosus;ko04610//Complement and coagulation cascades;ko05020//Prion diseases	K03996;K03996;K03996	GO:0005579//membrane attack complex;GO:0005623//cell	GO:0005515//protein binding	GO:0006883//cellular sodium ion homeostasis;GO:0006955//immune response;GO:0006956//complement activation
ENSMUST00000087050	294721.125	436008.09375	249855.140625	169265.234375	291002.9375	159191.21875	326861.453125	206486.463541667	-0.662632042445241	0.00108644977802649	0.0235943043240482	Col4a4	collagen, type IV, alpha 4 [Source:MGI Symbol;Acc:MGI:104687]	Human Diseases;Environmental Information Processing;Human Diseases;Cellular Processes;Human Diseases;Organismal Systems;Environmental Information Processing;Human Diseases;Human Diseases;Organismal Systems	Cancers;Signal transduction;Infectious diseases;Cellular community - eukaryotes;Infectious diseases;Endocrine system;Signaling molecules and interaction;Endocrine and metabolic diseases;Cancers;Digestive system	ko05200//Pathways in cancer;ko04151//PI3K-Akt signaling pathway;ko05165//Human papillomavirus infection;ko04510//Focal adhesion;ko05146//Amoebiasis;ko04926//Relaxin signaling pathway;ko04512//ECM-receptor interaction;ko04933//AGE-RAGE signaling pathway in diabetic complications;ko05222//Small cell lung cancer;ko04974//Protein digestion and absorption	K06237;K06237;K06237;K06237;K06237;K06237;K06237;K06237;K06237;K06237	GO:0005576//extracellular region;GO:0005581//collagen trimer;GO:0005587//collagen type IV trimer;GO:0005604//basement membrane;GO:0005615//extracellular space;GO:0031012//extracellular matrix;GO:0062023//collagen-containing extracellular matrix	GO:0005201//extracellular matrix structural constituent;GO:0030020//extracellular matrix structural constituent conferring tensile strength	GO:0030198//extracellular matrix organization;GO:0032836//glomerular basement membrane development;GO:0038063//collagen-activated tyrosine kinase receptor signaling pathway
ENSMUST00000024042	403914.375	322442.625	459583.78125	229838.375	218805.921875	68244.84375	395313.59375	172296.380208333	-1.19810517417648	0.00115653268327896	0.0247626945601018	Creld2	cysteine-rich with EGF-like domains 2 [Source:MGI Symbol;Acc:MGI:1923987]	-	-	-	-	GO:0005615//extracellular space;GO:0005783//endoplasmic reticulum;GO:0005794//Golgi apparatus	GO:0003756//protein disulfide isomerase activity;GO:0005201//extracellular matrix structural constituent;GO:0005509//calcium ion binding;GO:0016853//isomerase activity	GO:0008150//biological_process
ENSMUST00000101164	369387.59375	803085.0625	649096.875	977643.0625	812663.1875	1158019.75	607189.84375	982775.333333333	0.694713988463487	0.00121793710820145	0.0258076673444756	Limch1	LIM and calponin homology domains 1 [Source:MGI Symbol;Acc:MGI:1924819]	-	-	-	-	GO:0001725//stress fiber;GO:0005737//cytoplasm;GO:0005856//cytoskeleton;GO:0016460//myosin II complex	GO:0003779//actin binding;GO:0005515//protein binding;GO:0032034//myosin II head/neck binding;GO:0046872//metal ion binding	GO:0001934//positive regulation of protein phosphorylation;GO:0030336//negative regulation of cell migration;GO:0031032//actomyosin structure organization;GO:0051496//positive regulation of stress fiber assembly;GO:0051893//regulation of focal adhesion assembly;GO:0060327//cytoplasmic actin-based contraction involved in cell motility
ENSMUST00000034915	612454.8125	614360.5	715764.4375	306806.15625	566348.375	407279.9375	647526.583333333	426811.489583333	-0.601340408499801	0.0012373204520523	0.0261282961438536	Ctsh	cathepsin H [Source:MGI Symbol;Acc:MGI:107285]	Cellular Processes;Cellular Processes	Cell growth and death;Transport and catabolism	ko04210//Apoptosis;ko04142//Lysosome	K01366;K01366	GO:0001520//outer dense fiber;GO:0001669//acrosomal vesicle;GO:0005615//extracellular space;GO:0005764//lysosome;GO:0005829//cytosol;GO:0005930//axoneme;GO:0036464//cytoplasmic ribonucleoprotein granule;GO:0043231//intracellular membrane-bounded organelle;GO:0097208//alveolar lamellar body	GO:0004175//endopeptidase activity;GO:0004177//aminopeptidase activity;GO:0004197//cysteine-type endopeptidase activity;GO:0004252//serine-type endopeptidase activity;GO:0008233//peptidase activity;GO:0008234//cysteine-type peptidase activity;GO:0008656//cysteine-type endopeptidase activator activity involved in apoptotic process;GO:0016505//peptidase activator activity involved in apoptotic proc…	GO:0001656//metanephros development;GO:0001913//T cell mediated cytotoxicity;GO:0002250//adaptive immune response;GO:0002764//immune response-regulating signaling pathway;GO:0006508//proteolysis;GO:0006915//apoptotic process;GO:0006919//activation of cysteine-type endopeptidase activity involved in apoptotic process;GO:0008284//positive regulation of cell proliferation;GO:0010628//positive regula…
ENSMUST00000103380	733887.25	129219.4296875	2111461.75	120932.9375	32752.404296875	16894.875	991522.809895833	56860.072265625	-4.12415812420442	0.00126481876167128	0.0266175044194178	Igkv8-28	immunoglobulin kappa variable 8-28 [Source:MGI Symbol;Acc:MGI:3642251]	-	-	-	-	GO:0005615//extracellular space	-	GO:0002377//immunoglobulin production;GO:0006955//immune response
ENSMUST00000034905	693569.3125	553968.25	651160.6875	355324.5	354802.0625	289899.5625	632899.416666667	333342.041666667	-0.924972953950225	0.00129978678342535	0.0270752196072839	Gclc	glutamate-cysteine ligase, catalytic subunit [Source:MGI Symbol;Acc:MGI:104990]	Metabolism;Cellular Processes;Metabolism;Metabolism	Global and overview maps;Cell growth and death;Amino acid metabolism;Metabolism of other amino acids	ko01100//Metabolic pathways;ko04216//Ferroptosis;ko00270//Cysteine and methionine metabolism;ko00480//Glutathione metabolism	K11204;K11204;K11204;K11204	GO:0005623//cell;GO:0005739//mitochondrion;GO:0005829//cytosol;GO:0017109//glutamate-cysteine ligase complex	GO:0000166//nucleotide binding;GO:0000287//magnesium ion binding;GO:0003824//catalytic activity;GO:0004357//glutamate-cysteine ligase activity;GO:0005515//protein binding;GO:0005524//ATP binding;GO:0016595//glutamate binding;GO:0016874//ligase activity;GO:0043531//ADP binding;GO:0044877//protein-containing complex binding;GO:0050662//coenzyme binding	GO:0006534//cysteine metabolic process;GO:0006536//glutamate metabolic process;GO:0006749//glutathione metabolic process;GO:0006750//glutathione biosynthetic process;GO:0006979//response to oxidative stress;GO:0007568//aging;GO:0007584//response to nutrient;GO:0009408//response to heat;GO:0009410//response to xenobiotic stimulus;GO:0009725//response to hormone;GO:0014823//response to activity;GO:…
ENSMUST00000001801	228917.6875	185074.53125	168701.65625	105740.890625	108351.921875	135197.109375	194231.291666667	116429.973958333	-0.738313128849461	0.00133501370682554	0.0275290578135669	Tcirg1	T cell, immune regulator 1, ATPase, H+ transporting, lysosomal V0 protein A3 [Source:MGI Symbol;Acc:MGI:1350931]	Metabolism;Human Diseases;Human Diseases;Cellular Processes;Cellular Processes;Metabolism;Human Diseases;Organismal Systems;Organismal Systems	Global and overview maps;Infectious diseases;Infectious diseases;Transport and catabolism;Transport and catabolism;Energy metabolism;Immune diseases;Nervous system;Excretory system	ko01100//Metabolic pathways;ko05165//Human papillomavirus infection;ko05152//Tuberculosis;ko04145//Phagosome;ko04142//Lysosome;ko00190//Oxidative phosphorylation;ko05323//Rheumatoid arthritis;ko04721//Synaptic vesicle cycle;ko04966//Collecting duct acid secretion	K02154;K02154;K02154;K02154;K02154;K02154;K02154;K02154;K02154	GO:0000220//vacuolar proton-transporting V-type ATPase, V0 domain;GO:0005623//cell;GO:0005634//nucleus;GO:0005739//mitochondrion;GO:0005764//lysosome;GO:0005770//late endosome;GO:0005886//plasma membrane;GO:0016020//membrane;GO:0016021//integral component of membrane;GO:0016324//apical plasma membrane;GO:0016471//vacuolar proton-transporting V-type ATPase complex;GO:0030667//secretory granule mem…	GO:0005515//protein binding;GO:0015078//proton transmembrane transporter activity;GO:0046961//proton-transporting ATPase activity, rotational mechanism;GO:0051117//ATPase binding	GO:0000045//autophagosome assembly;GO:0001503//ossification;GO:0002158//osteoclast proliferation;GO:0002377//immunoglobulin production;GO:0006811//ion transport;GO:0006874//cellular calcium ion homeostasis;GO:0006914//autophagy;GO:0006915//apoptotic process;GO:0006954//inflammatory response;GO:0007035//vacuolar acidification;GO:0007039//protein catabolic process in the vacuole;GO:0010155//regulat…
ENSMUST00000126070	228917.6875	185074.53125	168701.65625	105740.890625	108351.921875	135197.109375	194231.291666667	116429.973958333	-0.738313128849461	0.00133501370682554	0.0275290578135669	Tcirg1	T cell, immune regulator 1, ATPase, H+ transporting, lysosomal V0 protein A3 [Source:MGI Symbol;Acc:MGI:1350931]	Metabolism;Human Diseases;Human Diseases;Cellular Processes;Cellular Processes;Metabolism;Human Diseases;Organismal Systems;Organismal Systems	Global and overview maps;Infectious diseases;Infectious diseases;Transport and catabolism;Transport and catabolism;Energy metabolism;Immune diseases;Nervous system;Excretory system	ko01100//Metabolic pathways;ko05165//Human papillomavirus infection;ko05152//Tuberculosis;ko04145//Phagosome;ko04142//Lysosome;ko00190//Oxidative phosphorylation;ko05323//Rheumatoid arthritis;ko04721//Synaptic vesicle cycle;ko04966//Collecting duct acid secretion	K02154;K02154;K02154;K02154;K02154;K02154;K02154;K02154;K02154	GO:0000220//vacuolar proton-transporting V-type ATPase, V0 domain;GO:0005623//cell;GO:0005634//nucleus;GO:0005739//mitochondrion;GO:0005764//lysosome;GO:0005770//late endosome;GO:0005886//plasma membrane;GO:0016020//membrane;GO:0016021//integral component of membrane;GO:0016324//apical plasma membrane;GO:0016471//vacuolar proton-transporting V-type ATPase complex;GO:0030667//secretory granule mem…	GO:0005515//protein binding;GO:0015078//proton transmembrane transporter activity;GO:0046961//proton-transporting ATPase activity, rotational mechanism;GO:0051117//ATPase binding	GO:0000045//autophagosome assembly;GO:0001503//ossification;GO:0002158//osteoclast proliferation;GO:0002377//immunoglobulin production;GO:0006811//ion transport;GO:0006874//cellular calcium ion homeostasis;GO:0006914//autophagy;GO:0006915//apoptotic process;GO:0006954//inflammatory response;GO:0007035//vacuolar acidification;GO:0007039//protein catabolic process in the vacuole;GO:0010155//regulat…
ENSMUST00000145791	228917.6875	185074.53125	168701.65625	105740.890625	108351.921875	135197.109375	194231.291666667	116429.973958333	-0.738313128849461	0.00133501370682554	0.0275290578135669	Tcirg1	T cell, immune regulator 1, ATPase, H+ transporting, lysosomal V0 protein A3 [Source:MGI Symbol;Acc:MGI:1350931]	Metabolism;Human Diseases;Human Diseases;Cellular Processes;Cellular Processes;Metabolism;Human Diseases;Organismal Systems;Organismal Systems	Global and overview maps;Infectious diseases;Infectious diseases;Transport and catabolism;Transport and catabolism;Energy metabolism;Immune diseases;Nervous system;Excretory system	ko01100//Metabolic pathways;ko05165//Human papillomavirus infection;ko05152//Tuberculosis;ko04145//Phagosome;ko04142//Lysosome;ko00190//Oxidative phosphorylation;ko05323//Rheumatoid arthritis;ko04721//Synaptic vesicle cycle;ko04966//Collecting duct acid secretion	K02154;K02154;K02154;K02154;K02154;K02154;K02154;K02154;K02154	GO:0000220//vacuolar proton-transporting V-type ATPase, V0 domain;GO:0005623//cell;GO:0005634//nucleus;GO:0005739//mitochondrion;GO:0005764//lysosome;GO:0005770//late endosome;GO:0005886//plasma membrane;GO:0016020//membrane;GO:0016021//integral component of membrane;GO:0016324//apical plasma membrane;GO:0016471//vacuolar proton-transporting V-type ATPase complex;GO:0030667//secretory granule mem…	GO:0005515//protein binding;GO:0015078//proton transmembrane transporter activity;GO:0046961//proton-transporting ATPase activity, rotational mechanism;GO:0051117//ATPase binding	GO:0000045//autophagosome assembly;GO:0001503//ossification;GO:0002158//osteoclast proliferation;GO:0002377//immunoglobulin production;GO:0006811//ion transport;GO:0006874//cellular calcium ion homeostasis;GO:0006914//autophagy;GO:0006915//apoptotic process;GO:0006954//inflammatory response;GO:0007035//vacuolar acidification;GO:0007039//protein catabolic process in the vacuole;GO:0010155//regulat…
ENSMUST00000188804	131747.34375	138216.84375	238002.40625	55119.25	103351.0234375	95446.6796875	169322.197916667	84638.984375	-1.00037689999036	0.00134332153819986	0.0276077286028032	Mndal	myeloid nuclear differentiation antigen like [Source:MGI Symbol;Acc:MGI:3780953]	Organismal Systems	Immune system	ko04621//NOD-like receptor signaling pathway	K20914	GO:0005634//nucleus;GO:0005654//nucleoplasm;GO:0005730//nucleolus;GO:0005829//cytosol	GO:0000978//RNA polymerase II proximal promoter sequence-specific DNA binding;GO:0001227//DNA-binding transcription repressor activity, RNA polymerase II-specific;GO:0003674//molecular_function;GO:0003690//double-stranded DNA binding;GO:0008134//transcription factor binding;GO:0042802//identical protein binding	GO:0000122//negative regulation of transcription by RNA polymerase II;GO:0002218//activation of innate immune response;GO:0009617//response to bacterium;GO:0030308//negative regulation of cell growth;GO:0032731//positive regulation of interleukin-1 beta production;GO:0035458//cellular response to interferon-beta;GO:0040008//regulation of growth
ENSMUST00000002640	104857.5234375	88286.8046875	60965.17578125	39409.609375	30378.126953125	24845.115234375	84703.16796875	31544.2838541667	-1.42503733071586	0.00136533329960235	0.0279665770868548	Scin	scinderin [Source:MGI Symbol;Acc:MGI:1306794]	Human Diseases;Cellular Processes;Organismal Systems	Cancers;Cell motility;Immune system	ko05203//Viral carcinogenesis;ko04810//Regulation of actin cytoskeleton;ko04666//Fc gamma R-mediated phagocytosis	K05768;K05768;K05768	GO:0002102//podosome;GO:0005623//cell;GO:0005737//cytoplasm;GO:0005856//cytoskeleton;GO:0005886//plasma membrane;GO:0005903//brush border;GO:0030054//cell junction;GO:0032991//protein-containing complex;GO:0042995//cell projection	GO:0003779//actin binding;GO:0005509//calcium ion binding;GO:0046872//metal ion binding;GO:0051015//actin filament binding	GO:0008285//negative regulation of cell proliferation;GO:0032330//regulation of chondrocyte differentiation;GO:0042989//sequestering of actin monomers;GO:0043065//positive regulation of apoptotic process;GO:0045654//positive regulation of megakaryocyte differentiation;GO:0051014//actin filament severing;GO:0051127//positive regulation of actin nucleation;GO:0051693//actin filament capping
ENSMUST00000003947	73756.8828125	109132.09375	88348.0078125	125110.7109375	135659.8125	163284.921875	90412.328125	141351.815104167	0.644698999908928	0.00138444037253499	0.0282024221994667	Nqo1	NAD(P)H dehydrogenase, quinone 1 [Source:MGI Symbol;Acc:MGI:103187]	Metabolism;Human Diseases;Human Diseases;Human Diseases;Metabolism	Global and overview maps;Cancers;Cancers;Cardiovascular diseases;Metabolism of cofactors and vitamins	ko01100//Metabolic pathways;ko05200//Pathways in cancer;ko05225//Hepatocellular carcinoma;ko05418//Fluid shear stress and atherosclerosis;ko00130//Ubiquinone and other terpenoid-quinone biosynthesis	K00355;K00355;K00355;K00355;K00355	GO:0005623//cell;GO:0005737//cytoplasm;GO:0005829//cytosol;GO:0030425//dendrite;GO:0043025//neuronal cell body	GO:0003955//NAD(P)H dehydrogenase (quinone) activity;GO:0004784//superoxide dismutase activity;GO:0016491//oxidoreductase activity;GO:0042802//identical protein binding	GO:0006801//superoxide metabolic process;GO:0006979//response to oxidative stress;GO:0007568//aging;GO:0007584//response to nutrient;GO:0014070//response to organic cyclic compound;GO:0019430//removal of superoxide radicals;GO:0032355//response to estradiol;GO:0043066//negative regulation of apoptotic process;GO:0043086//negative regulation of catalytic activity;GO:0043525//positive regulation of…
ENSMUST00000028332	102549.0078125	119043.796875	108520.28125	60691.25	105527.140625	48508.27734375	110037.6953125	71575.5559895833	-0.620458951470001	0.00138602628221952	0.0282024221994667	Dpp7	dipeptidylpeptidase 7 [Source:MGI Symbol;Acc:MGI:1933213]	-	-	-	-	GO:0005576//extracellular region;GO:0005764//lysosome;GO:0005794//Golgi apparatus;GO:0005829//cytosol;GO:0031410//cytoplasmic vesicle;GO:0031982//vesicle;GO:0043231//intracellular membrane-bounded organelle	GO:0004177//aminopeptidase activity;GO:0008233//peptidase activity;GO:0008236//serine-type peptidase activity;GO:0008239//dipeptidyl-peptidase activity;GO:0016787//hydrolase activity	GO:0006508//proteolysis
ENSMUST00000045173	420807.34375	419398.3125	326763.0625	240024.46875	305630.875	230708.6875	388989.572916667	258788.010416667	-0.587960704300425	0.00143264513265966	0.0287699488241621	Tgfbi	transforming growth factor, beta induced [Source:MGI Symbol;Acc:MGI:99959]	-	-	-	-	GO:0005576//extracellular region;GO:0005604//basement membrane;GO:0005615//extracellular space;GO:0005802//trans-Golgi network;GO:0031012//extracellular matrix;GO:0062023//collagen-containing extracellular matrix	GO:0005178//integrin binding;GO:0005201//extracellular matrix structural constituent;GO:0005515//protein binding;GO:0005518//collagen binding;GO:0050839//cell adhesion molecule binding;GO:0050840//extracellular matrix binding	GO:0001525//angiogenesis;GO:0002062//chondrocyte differentiation;GO:0007155//cell adhesion;GO:0008283//cell proliferation;GO:0030198//extracellular matrix organization
ENSMUST00000000329	85929.4453125	89131.8125	83609.671875	126635.359375	140661.8125	271828.84375	86223.6432291667	179708.671875	1.05950460057065	0.00144946269693709	0.0290128608230567	Alox12	arachidonate 12-lipoxygenase [Source:MGI Symbol;Acc:MGI:87998]	Metabolism;Organismal Systems;Organismal Systems;Human Diseases;Metabolism	Global and overview maps;Nervous system;Sensory system;Drug resistance;Lipid metabolism	ko01100//Metabolic pathways;ko04726//Serotonergic synapse;ko04750//Inflammatory mediator regulation of TRP channels;ko01523//Antifolate resistance;ko00590//Arachidonic acid metabolism	K00458;K00458;K00458;K00458;K00458	GO:0005737//cytoplasm;GO:0005829//cytosol;GO:0005886//plasma membrane;GO:0016020//membrane;GO:0042383//sarcolemma	GO:0004052//arachidonate 12-lipoxygenase activity;GO:0005506//iron ion binding;GO:0005515//protein binding;GO:0016165//linoleate 13S-lipoxygenase activity;GO:0016491//oxidoreductase activity;GO:0016702//oxidoreductase activity, acting on single donors with incorporation of molecular oxygen, incorporation of two atoms of oxygen;GO:0016787//hydrolase activity;GO:0046872//metal ion binding;GO:004797…	GO:0006629//lipid metabolic process;GO:0006631//fatty acid metabolic process;GO:0007568//aging;GO:0010628//positive regulation of gene expression;GO:0010656//negative regulation of muscle cell apoptotic process;GO:0010942//positive regulation of cell death;GO:0019369//arachidonic acid metabolic process;GO:0019372//lipoxygenase pathway;GO:0019395//fatty acid oxidation;GO:0033559//unsaturated fatty…
ENSMUST00000045593	95539.328125	60931.68359375	76255.9375	53890.06640625	40077.984375	53847.05078125	77575.6497395833	49271.7005208333	-0.654844610747332	0.00151171594346624	0.0300630889080908	Daglb	diacylglycerol lipase, beta [Source:MGI Symbol;Acc:MGI:2442032]	Organismal Systems;Organismal Systems	Nervous system;Endocrine system	ko04723//Retrograde endocannabinoid signaling;ko04925//Aldosterone synthesis and secretion	K13806;K13806	GO:0005654//nucleoplasm;GO:0005886//plasma membrane;GO:0016020//membrane;GO:0016021//integral component of membrane;GO:0045211//postsynaptic membrane	GO:0016787//hydrolase activity;GO:0046872//metal ion binding	GO:0006629//lipid metabolic process;GO:0007216//G protein-coupled glutamate receptor signaling pathway;GO:0007405//neuroblast proliferation;GO:0016042//lipid catabolic process;GO:0019369//arachidonic acid metabolic process;GO:0022008//neurogenesis;GO:0042136//neurotransmitter biosynthetic process;GO:0046340//diacylglycerol catabolic process;GO:0071926//endocannabinoid signaling pathway;GO:0098921…
ENSMUST00000093508	92936.578125	71097.1328125	112126.53125	49048.515625	42760.47265625	41616.2734375	92053.4140625	44475.0872395833	-1.04947379361686	0.00156043062808585	0.0308323029247188	Sp110	Sp110 nuclear body protein [Source:MGI Symbol;Acc:MGI:1923364]	-	-	-	-	GO:0005634//nucleus;GO:0005654//nucleoplasm	GO:0003677//DNA binding	GO:0002376//immune system process;GO:0006915//apoptotic process;GO:0009617//response to bacterium;GO:0043065//positive regulation of apoptotic process;GO:0045087//innate immune response
ENSMUST00000201203	173561.578125	62629.62109375	129065.3203125	103646.3203125	36029.58203125	60674.26171875	121752.173177083	66783.3880208333	-0.86638633302795	0.00158859176839494	0.0312881295409837	Tmem214	transmembrane protein 214 [Source:MGI Symbol;Acc:MGI:1916046]	-	-	-	-	GO:0005783//endoplasmic reticulum;GO:0005789//endoplasmic reticulum membrane;GO:0005794//Golgi apparatus;GO:0005829//cytosol;GO:0005881//cytoplasmic microtubule;GO:0016020//membrane;GO:0016021//integral component of membrane	GO:0003674//molecular_function	GO:0006915//apoptotic process;GO:0008150//biological_process
ENSMUST00000138703	1074517.25	2069237.875	871837.9375	641620.5	505298.625	1260482	1338531.02083333	802467.041666667	-0.738136528970215	0.00160614461491524	0.0315327752672656	Pfkp	phosphofructokinase, platelet [Source:MGI Symbol;Acc:MGI:1891833]	Metabolism;Metabolism;Environmental Information Processing;Environmental Information Processing;Organismal Systems;Genetic Information Processing;Metabolism;Metabolism;Human Diseases;Metabolism;Metabolism;Metabolism	Global and overview maps;Global and overview maps;Signal transduction;Signal transduction;Endocrine system;Folding, sorting and degradation;Global and overview maps;Carbohydrate metabolism;Cancers;Carbohydrate metabolism;Carbohydrate metabolism;Carbohydrate metabolism	ko01100//Metabolic pathways;ko01200//Carbon metabolism;ko04152//AMPK signaling pathway;ko04066//HIF-1 signaling pathway;ko04922//Glucagon signaling pathway;ko03018//RNA degradation;ko01230//Biosynthesis of amino acids;ko00010//Glycolysis / Gluconeogenesis;ko05230//Central carbon metabolism in cancer;ko00051//Fructose and mannose metabolism;ko00030//Pentose phosphate pathway;ko00052//Galactose met…	K00850;K00850;K00850;K00850;K00850;K00850;K00850;K00850;K00850;K00850;K00850;K00850	GO:0005737//cytoplasm;GO:0005829//cytosol;GO:0005945//6-phosphofructokinase complex;GO:0016020//membrane	GO:0000166//nucleotide binding;GO:0003824//catalytic activity;GO:0003872//6-phosphofructokinase activity;GO:0005524//ATP binding;GO:0016208//AMP binding;GO:0016301//kinase activity;GO:0016740//transferase activity;GO:0042802//identical protein binding;GO:0044877//protein-containing complex binding;GO:0046872//metal ion binding;GO:0048029//monosaccharide binding;GO:0070095//fructose-6-phosphate bi…	GO:0006002//fructose 6-phosphate metabolic process;GO:0006007//glucose catabolic process;GO:0006096//glycolytic process;GO:0008152//metabolic process;GO:0016310//phosphorylation;GO:0030388//fructose 1,6-bisphosphate metabolic process;GO:0051289//protein homotetramerization;GO:0061615//glycolytic process through fructose-6-phosphate;GO:0061621//canonical glycolysis;GO:1990830//cellular response to…
ENSMUST00000031322	384636.625	199842.296875	292279.125	124639.296875	146311.53125	139639.515625	292252.682291667	136863.447916667	-1.09447906798524	0.00167614369505742	0.0324918075903088	Cxcl15	chemokine (C-X-C motif) ligand 15 [Source:MGI Symbol;Acc:MGI:1339941]	Organismal Systems;Environmental Information Processing	Immune system;Signaling molecules and interaction	ko04062//Chemokine signaling pathway;ko04060//Cytokine-cytokine receptor interaction	K10034;K10034	GO:0005576//extracellular region;GO:0005615//extracellular space	GO:0005125//cytokine activity;GO:0008009//chemokine activity;GO:0045236//CXCR chemokine receptor binding	GO:0006935//chemotaxis;GO:0006952//defense response;GO:0006954//inflammatory response;GO:0006955//immune response;GO:0030097//hemopoiesis;GO:0030593//neutrophil chemotaxis;GO:0030595//leukocyte chemotaxis;GO:0061844//antimicrobial humoral immune response mediated by antimicrobial peptide;GO:0070098//chemokine-mediated signaling pathway;GO:0071222//cellular response to lipopolysaccharide
ENSMUST00000006035	103967.8125	111861.546875	140756.21875	79658.3515625	86119.265625	43383.984375	118861.859375	69720.5338541667	-0.769630333128017	0.00184307987106524	0.0349559438509132	Ergic3	ERGIC and golgi 3 [Source:MGI Symbol;Acc:MGI:1913616]	-	-	-	-	GO:0005783//endoplasmic reticulum;GO:0005789//endoplasmic reticulum membrane;GO:0005793//endoplasmic reticulum-Golgi intermediate compartment;GO:0005794//Golgi apparatus;GO:0016020//membrane;GO:0016021//integral component of membrane;GO:0030134//COPII-coated ER to Golgi transport vesicle;GO:0030173//integral component of Golgi membrane;GO:0030176//integral component of endoplasmic reticulum membr…	GO:0003674//molecular_function	GO:0006888//ER to Golgi vesicle-mediated transport;GO:0006890//retrograde vesicle-mediated transport, Golgi to ER;GO:0016192//vesicle-mediated transport
ENSMUST00000088650	103967.8125	111861.546875	140756.21875	79658.3515625	86119.265625	43383.984375	118861.859375	69720.5338541667	-0.769630333128017	0.00184307987106524	0.0349559438509132	Ergic3	ERGIC and golgi 3 [Source:MGI Symbol;Acc:MGI:1913616]	-	-	-	-	GO:0005783//endoplasmic reticulum;GO:0005789//endoplasmic reticulum membrane;GO:0005793//endoplasmic reticulum-Golgi intermediate compartment;GO:0005794//Golgi apparatus;GO:0016020//membrane;GO:0016021//integral component of membrane;GO:0030134//COPII-coated ER to Golgi transport vesicle;GO:0030173//integral component of Golgi membrane;GO:0030176//integral component of endoplasmic reticulum membr…	GO:0003674//molecular_function	GO:0006888//ER to Golgi vesicle-mediated transport;GO:0006890//retrograde vesicle-mediated transport, Golgi to ER;GO:0016192//vesicle-mediated transport
ENSMUST00000142859	103967.8125	111861.546875	140756.21875	79658.3515625	86119.265625	43383.984375	118861.859375	69720.5338541667	-0.769630333128017	0.00184307987106524	0.0349559438509132	Ergic3	ERGIC and golgi 3 [Source:MGI Symbol;Acc:MGI:1913616]	-	-	-	-	-	-	-
ENSMUST00000155370	103967.8125	111861.546875	140756.21875	79658.3515625	86119.265625	43383.984375	118861.859375	69720.5338541667	-0.769630333128017	0.00184307987106524	0.0349559438509132	Ergic3	ERGIC and golgi 3 [Source:MGI Symbol;Acc:MGI:1913616]	-	-	-	-	-	-	-
ENSMUST00000024792	140819	144160.515625	166790.203125	277824.5	268304.34375	753800.6875	150589.90625	433309.84375	1.52477393932481	0.00193406050733493	0.036234151882845	Treml1	triggering receptor expressed on myeloid cells-like 1 [Source:MGI Symbol;Acc:MGI:1918576]	-	-	-	-	GO:0005737//cytoplasm;GO:0005886//plasma membrane;GO:0009986//cell surface;GO:0016020//membrane;GO:0016021//integral component of membrane;GO:0031091//platelet alpha granule	GO:0038023//signaling receptor activity	GO:0009968//negative regulation of signal transduction;GO:0019722//calcium-mediated signaling;GO:0030168//platelet activation;GO:0042060//wound healing
ENSMUST00000224001	140819	144160.515625	166790.203125	277824.5	268304.34375	753800.6875	150589.90625	433309.84375	1.52477393932481	0.00193406050733493	0.036234151882845	Treml1	triggering receptor expressed on myeloid cells-like 1 [Source:MGI Symbol;Acc:MGI:1918576]	-	-	-	-	GO:0005737//cytoplasm;GO:0005886//plasma membrane;GO:0009986//cell surface;GO:0016020//membrane;GO:0016021//integral component of membrane;GO:0031091//platelet alpha granule	GO:0038023//signaling receptor activity	GO:0009968//negative regulation of signal transduction;GO:0019722//calcium-mediated signaling;GO:0030168//platelet activation;GO:0042060//wound healing
ENSMUST00000080859	999735	727351.9375	1268472.125	1	31346.1328125	39838.6640625	998519.6875	23728.5989583333	-5.39509204806723	0.00206905368173769	0.0381811858086429	H3c8	H3 clustered histone 8 [Source:MGI Symbol;Acc:MGI:2145541]	Human Diseases;Human Diseases;Human Diseases	Substance dependence;Cancers;Immune diseases	ko05034//Alcoholism;ko05202//Transcriptional misregulation in cancers;ko05322//Systemic lupus erythematosus	K11253;K11253;K11253	GO:0000228//nuclear chromosome;GO:0000786//nucleosome;GO:0000788//nuclear nucleosome;GO:0005634//nucleus;GO:0005654//nucleoplasm;GO:0005694//chromosome;GO:0032991//protein-containing complex	GO:0003677//DNA binding;GO:0005515//protein binding;GO:0046982//protein heterodimerization activity	GO:0006334//nucleosome assembly;GO:0006335//DNA replication-dependent nucleosome assembly;GO:0060968//regulation of gene silencing
ENSMUST00000091701	999735	727351.9375	1268472.125	1	31346.1328125	39838.6640625	998519.6875	23728.5989583333	-5.39509204806723	0.00206905368173769	0.0381811858086429	H3c1	H3 clustered histone 1 [Source:MGI Symbol;Acc:MGI:2668828]	Human Diseases;Human Diseases;Human Diseases	Substance dependence;Cancers;Immune diseases	ko05034//Alcoholism;ko05202//Transcriptional misregulation in cancers;ko05322//Systemic lupus erythematosus	K11253;K11253;K11253	GO:0000228//nuclear chromosome;GO:0000786//nucleosome;GO:0000788//nuclear nucleosome;GO:0005634//nucleus;GO:0005654//nucleoplasm;GO:0005694//chromosome;GO:0032991//protein-containing complex	GO:0003677//DNA binding;GO:0005515//protein binding;GO:0046982//protein heterodimerization activity	GO:0006334//nucleosome assembly;GO:0006335//DNA replication-dependent nucleosome assembly;GO:0060968//regulation of gene silencing
ENSMUST00000188775	999735	727351.9375	1268472.125	1	31346.1328125	39838.6640625	998519.6875	23728.5989583333	-5.39509204806723	0.00206905368173769	0.0381811858086429	H3c10	H3 clustered histone 10 [Source:MGI Symbol;Acc:MGI:2448349]	Human Diseases;Human Diseases;Human Diseases	Substance dependence;Cancers;Immune diseases	ko05034//Alcoholism;ko05202//Transcriptional misregulation in cancers;ko05322//Systemic lupus erythematosus	K11253;K11253;K11253	GO:0000228//nuclear chromosome;GO:0000786//nucleosome;GO:0000788//nuclear nucleosome;GO:0005634//nucleus;GO:0005654//nucleoplasm;GO:0005694//chromosome;GO:0032991//protein-containing complex	GO:0003677//DNA binding;GO:0005515//protein binding;GO:0046982//protein heterodimerization activity	GO:0006334//nucleosome assembly;GO:0006335//DNA replication-dependent nucleosome assembly;GO:0060968//regulation of gene silencing
ENSMUST00000189457	999735	727351.9375	1268472.125	1	31346.1328125	39838.6640625	998519.6875	23728.5989583333	-5.39509204806723	0.00206905368173769	0.0381811858086429	H3c11	H3 clustered histone 11 [Source:MGI Symbol;Acc:MGI:2448350]	Human Diseases;Human Diseases;Human Diseases	Substance dependence;Cancers;Immune diseases	ko05034//Alcoholism;ko05202//Transcriptional misregulation in cancers;ko05322//Systemic lupus erythematosus	K11253;K11253;K11253	GO:0000228//nuclear chromosome;GO:0000786//nucleosome;GO:0000788//nuclear nucleosome;GO:0005634//nucleus;GO:0005654//nucleoplasm;GO:0005694//chromosome;GO:0032991//protein-containing complex	GO:0003677//DNA binding;GO:0005515//protein binding;GO:0046982//protein heterodimerization activity	GO:0006334//nucleosome assembly;GO:0006335//DNA replication-dependent nucleosome assembly;GO:0060968//regulation of gene silencing
ENSMUST00000042665	117228.4375	61561.671875	90068.578125	47884.7421875	50508.94921875	53038.73828125	89619.5625	50477.4765625	-0.828173893794128	0.00213071833818882	0.0387925469680133	Parp14	poly (ADP-ribose) polymerase family, member 14 [Source:MGI Symbol;Acc:MGI:1919489]	-	-	-	-	GO:0005634//nucleus;GO:0005737//cytoplasm;GO:0005829//cytosol;GO:0005886//plasma membrane	GO:0003950//NAD+ ADP-ribosyltransferase activity;GO:0005515//protein binding;GO:0016740//transferase activity;GO:0016757//transferase activity, transferring glycosyl groups;GO:0019899//enzyme binding;GO:0070403//NAD+ binding;GO:1990404//protein ADP-ribosylase activity	GO:0002376//immune system process;GO:0006471//protein ADP-ribosylation;GO:0010629//negative regulation of gene expression;GO:0042531//positive regulation of tyrosine phosphorylation of STAT protein;GO:0042532//negative regulation of tyrosine phosphorylation of STAT protein;GO:0045087//innate immune response;GO:0060336//negative regulation of interferon-gamma-mediated signaling pathway;GO:0070212/…
ENSMUST00000033898	2324904.25	3125659.75	2175159.5	887540.75	1952451	1127464	2541907.83333333	1322485.25	-0.942660089121449	0.00213210453172099	0.0387925469680133	Col4a1	collagen, type IV, alpha 1 [Source:MGI Symbol;Acc:MGI:88454]	Human Diseases;Environmental Information Processing;Human Diseases;Cellular Processes;Human Diseases;Organismal Systems;Environmental Information Processing;Human Diseases;Human Diseases;Organismal Systems	Cancers;Signal transduction;Infectious diseases;Cellular community - eukaryotes;Infectious diseases;Endocrine system;Signaling molecules and interaction;Endocrine and metabolic diseases;Cancers;Digestive system	ko05200//Pathways in cancer;ko04151//PI3K-Akt signaling pathway;ko05165//Human papillomavirus infection;ko04510//Focal adhesion;ko05146//Amoebiasis;ko04926//Relaxin signaling pathway;ko04512//ECM-receptor interaction;ko04933//AGE-RAGE signaling pathway in diabetic complications;ko05222//Small cell lung cancer;ko04974//Protein digestion and absorption	K06237;K06237;K06237;K06237;K06237;K06237;K06237;K06237;K06237;K06237	GO:0005576//extracellular region;GO:0005581//collagen trimer;GO:0005587//collagen type IV trimer;GO:0005604//basement membrane;GO:0005615//extracellular space;GO:0031012//extracellular matrix;GO:0062023//collagen-containing extracellular matrix	GO:0005201//extracellular matrix structural constituent;GO:0030020//extracellular matrix structural constituent conferring tensile strength;GO:0048407//platelet-derived growth factor binding	GO:0001525//angiogenesis;GO:0001569//branching involved in blood vessel morphogenesis;GO:0007420//brain development;GO:0007528//neuromuscular junction development;GO:0030198//extracellular matrix organization;GO:0030855//epithelial cell differentiation;GO:0038063//collagen-activated tyrosine kinase receptor signaling pathway;GO:0048514//blood vessel morphogenesis;GO:0061304//retinal blood vessel …
ENSMUST00000032503	206850.4375	286624	259909.703125	375313.1875	396259.53125	536667.5	251128.046875	436080.072916667	0.796169903708104	0.00221105796227423	0.0397279274215647	Tspan9	tetraspanin 9 [Source:MGI Symbol;Acc:MGI:1924558]	-	-	-	-	GO:0005886//plasma membrane;GO:0005887//integral component of plasma membrane;GO:0016020//membrane;GO:0016021//integral component of membrane;GO:0097197//tetraspanin-enriched microdomain	GO:0003674//molecular_function	-
ENSMUST00000112171	206850.4375	286624	259909.703125	375313.1875	396259.53125	536667.5	251128.046875	436080.072916667	0.796169903708104	0.00221105796227423	0.0397279274215647	Tspan9	tetraspanin 9 [Source:MGI Symbol;Acc:MGI:1924558]	-	-	-	-	GO:0005886//plasma membrane;GO:0005887//integral component of plasma membrane;GO:0016020//membrane;GO:0016021//integral component of membrane;GO:0097197//tetraspanin-enriched microdomain	GO:0003674//molecular_function	-
ENSMUST00000112173	206850.4375	286624	259909.703125	375313.1875	396259.53125	536667.5	251128.046875	436080.072916667	0.796169903708104	0.00221105796227423	0.0397279274215647	Tspan9	tetraspanin 9 [Source:MGI Symbol;Acc:MGI:1924558]	-	-	-	-	GO:0005886//plasma membrane;GO:0005887//integral component of plasma membrane;GO:0016020//membrane;GO:0016021//integral component of membrane;GO:0097197//tetraspanin-enriched microdomain	GO:0003674//molecular_function	-
ENSMUST00000074557	629640.3125	347669.75	573443.5	294809.90625	379679.78125	189738.53125	516917.854166667	288076.072916667	-0.843485195535751	0.00222865209618803	0.039927309420045	H2-Eb1	histocompatibility 2, class II antigen E beta [Source:MGI Symbol;Acc:MGI:95901]	Human Diseases;Human Diseases;Human Diseases;Cellular Processes;Human Diseases;Human Diseases;Human Diseases;Human Diseases;Human Diseases;Organismal Systems;Human Diseases;Environmental Information Processing;Human Diseases;Human Diseases;Organismal Systems;Human Diseases;Human Diseases;Organismal Systems;Human Diseases;Organismal Systems;Organismal Systems;Human Diseases;Human Diseases;Human Di…	Infectious diseases;Infectious diseases;Infectious diseases;Transport and catabolism;Infectious diseases;Immune diseases;Infectious diseases;Cardiovascular diseases;Infectious diseases;Immune system;Infectious diseases;Signaling molecules and interaction;Immune diseases;Infectious diseases;Immune system;Immune diseases;Immune diseases;Immune system;Immune diseases;Immune system;Immune system;Immu…	ko05169//Epstein-Barr virus infection;ko05152//Tuberculosis;ko05168//Herpes simplex infection;ko04145//Phagosome;ko05166//HTLV-I infection;ko05322//Systemic lupus erythematosus;ko05164//Influenza A;ko05416//Viral myocarditis;ko05145//Toxoplasmosis;ko04640//Hematopoietic cell lineage;ko05140//Leishmaniasis;ko04514//Cell adhesion molecules (CAMs);ko05323//Rheumatoid arthritis;ko05150//Staphylococcu…	K06752;K06752;K06752;K06752;K06752;K06752;K06752;K06752;K06752;K06752;K06752;K06752;K06752;K06752;K06752;K06752;K06752;K06752;K06752;K06752;K06752;K06752;K06752;K06752	GO:0016020//membrane;GO:0042613//MHC class II protein complex	-	GO:0006955//immune response;GO:0019882//antigen processing and presentation
ENSMUST00000235530	629640.3125	347669.75	573443.5	294809.90625	379679.78125	189738.53125	516917.854166667	288076.072916667	-0.843485195535751	0.00222865209618803	0.039927309420045	H2-Eb1	histocompatibility 2, class II antigen E beta [Source:MGI Symbol;Acc:MGI:95901]	Human Diseases;Human Diseases;Human Diseases;Cellular Processes;Human Diseases;Human Diseases;Human Diseases;Human Diseases;Human Diseases;Organismal Systems;Human Diseases;Environmental Information Processing;Human Diseases;Human Diseases;Organismal Systems;Human Diseases;Human Diseases;Organismal Systems;Human Diseases;Organismal Systems;Organismal Systems;Human Diseases;Human Diseases;Human Di…	Infectious diseases;Infectious diseases;Infectious diseases;Transport and catabolism;Infectious diseases;Immune diseases;Infectious diseases;Cardiovascular diseases;Infectious diseases;Immune system;Infectious diseases;Signaling molecules and interaction;Immune diseases;Infectious diseases;Immune system;Immune diseases;Immune diseases;Immune system;Immune diseases;Immune system;Immune system;Immu…	ko05169//Epstein-Barr virus infection;ko05152//Tuberculosis;ko05168//Herpes simplex infection;ko04145//Phagosome;ko05166//HTLV-I infection;ko05322//Systemic lupus erythematosus;ko05164//Influenza A;ko05416//Viral myocarditis;ko05145//Toxoplasmosis;ko04640//Hematopoietic cell lineage;ko05140//Leishmaniasis;ko04514//Cell adhesion molecules (CAMs);ko05323//Rheumatoid arthritis;ko05150//Staphylococcu…	K06752;K06752;K06752;K06752;K06752;K06752;K06752;K06752;K06752;K06752;K06752;K06752;K06752;K06752;K06752;K06752;K06752;K06752;K06752;K06752;K06752;K06752;K06752;K06752	GO:0016020//membrane;GO:0016021//integral component of membrane;GO:0042613//MHC class II protein complex	-	GO:0006955//immune response;GO:0019882//antigen processing and presentation
ENSMUST00000109958	1074830	1110945	1121366.5	427684.90625	461005.25	172838.640625	1102380.5	353842.932291667	-1.63944126545334	0.00224115024173771	0.0400253457221532	Serpina3i	serine (or cysteine) peptidase inhibitor, clade A, member 3I [Source:MGI Symbol;Acc:MGI:2182841]	-	-	-	-	GO:0005615//extracellular space	GO:0004867//serine-type endopeptidase inhibitor activity	GO:0010951//negative regulation of endopeptidase activity;GO:0034097//response to cytokine;GO:0043434//response to peptide hormone
ENSMUST00000163694	452352.6875	312018.375	415785.9375	576991	752163.625	627608.125	393385.666666667	652254.25	0.729490046695469	0.00242807624811678	0.0428938983493013	Pkm	pyruvate kinase, muscle [Source:MGI Symbol;Acc:MGI:97591]	Metabolism;Human Diseases;Human Diseases;Metabolism;Metabolism;Organismal Systems;Metabolism;Metabolism;Human Diseases;Metabolism;Human Diseases	Global and overview maps;Infectious diseases;Cancers;Global and overview maps;Nucleotide metabolism;Endocrine system;Global and overview maps;Carbohydrate metabolism;Cancers;Carbohydrate metabolism;Endocrine and metabolic diseases	ko01100//Metabolic pathways;ko05165//Human papillomavirus infection;ko05203//Viral carcinogenesis;ko01200//Carbon metabolism;ko00230//Purine metabolism;ko04922//Glucagon signaling pathway;ko01230//Biosynthesis of amino acids;ko00010//Glycolysis / Gluconeogenesis;ko05230//Central carbon metabolism in cancer;ko00620//Pyruvate metabolism;ko04930//Type II diabetes mellitus	K00873;K00873;K00873;K00873;K00873;K00873;K00873;K00873;K00873;K00873;K00873	GO:0005634//nucleus;GO:0005737//cytoplasm;GO:0005739//mitochondrion;GO:0005829//cytosol;GO:0005929//cilium;GO:0043209//myelin sheath;GO:0062023//collagen-containing extracellular matrix;GO:1902912//pyruvate kinase complex	GO:0000166//nucleotide binding;GO:0000287//magnesium ion binding;GO:0003824//catalytic activity;GO:0004743//pyruvate kinase activity;GO:0005515//protein binding;GO:0005524//ATP binding;GO:0016301//kinase activity;GO:0016740//transferase activity;GO:0030955//potassium ion binding;GO:0042802//identical protein binding;GO:0043531//ADP binding;GO:0046872//metal ion binding;GO:0070324//thyroid hormone…	GO:0001889//liver development;GO:0006006//glucose metabolic process;GO:0006096//glycolytic process;GO:0006754//ATP biosynthetic process;GO:0008152//metabolic process;GO:0012501//programmed cell death;GO:0016310//phosphorylation;GO:0031100//animal organ regeneration;GO:0032869//cellular response to insulin stimulus;GO:0042866//pyruvate biosynthetic process;GO:0043403//skeletal muscle tissue regene…
ENSMUST00000038142	104372.6015625	59449.14453125	89103.234375	18367.306640625	28783.033203125	30433.041015625	84308.3268229167	25861.126953125	-1.7048899828841	0.00242914184305238	0.0428938983493013	Isg20	interferon-stimulated protein [Source:MGI Symbol;Acc:MGI:1928895]	-	-	-	-	GO:0005634//nucleus;GO:0005730//nucleolus;GO:0005737//cytoplasm;GO:0015030//Cajal body;GO:0016605//PML body	GO:0000175//3'-5'-exoribonuclease activity;GO:0003676//nucleic acid binding;GO:0003723//RNA binding;GO:0004518//nuclease activity;GO:0004527//exonuclease activity;GO:0008310//single-stranded DNA 3'-5' exodeoxyribonuclease activity;GO:0008859//exoribonuclease II activity;GO:0016787//hydrolase activity;GO:0030619//U1 snRNA binding;GO:0030620//U2 snRNA binding;GO:0034511//U3 snoRNA binding;GO:004687…	GO:0000738//DNA catabolic process, exonucleolytic;GO:0002376//immune system process;GO:0006364//rRNA processing;GO:0006401//RNA catabolic process;GO:0009615//response to virus;GO:0045071//negative regulation of viral genome replication;GO:0045087//innate immune response;GO:0051607//defense response to virus;GO:0090503//RNA phosphodiester bond hydrolysis, exonucleolytic
ENSMUST00000118867	104372.6015625	59449.14453125	89103.234375	18367.306640625	28783.033203125	30433.041015625	84308.3268229167	25861.126953125	-1.7048899828841	0.00242914184305238	0.0428938983493013	Isg20	interferon-stimulated protein [Source:MGI Symbol;Acc:MGI:1928895]	-	-	-	-	GO:0005634//nucleus;GO:0005730//nucleolus;GO:0005737//cytoplasm;GO:0015030//Cajal body;GO:0016605//PML body	GO:0000175//3'-5'-exoribonuclease activity;GO:0003676//nucleic acid binding;GO:0003723//RNA binding;GO:0004518//nuclease activity;GO:0004527//exonuclease activity;GO:0008310//single-stranded DNA 3'-5' exodeoxyribonuclease activity;GO:0008859//exoribonuclease II activity;GO:0016787//hydrolase activity;GO:0030619//U1 snRNA binding;GO:0030620//U2 snRNA binding;GO:0034511//U3 snoRNA binding;GO:004687…	GO:0000738//DNA catabolic process, exonucleolytic;GO:0002376//immune system process;GO:0006364//rRNA processing;GO:0006401//RNA catabolic process;GO:0009615//response to virus;GO:0045071//negative regulation of viral genome replication;GO:0045087//innate immune response;GO:0051607//defense response to virus;GO:0090503//RNA phosphodiester bond hydrolysis, exonucleolytic
ENSMUST00000120331	104372.6015625	59449.14453125	89103.234375	18367.306640625	28783.033203125	30433.041015625	84308.3268229167	25861.126953125	-1.7048899828841	0.00242914184305238	0.0428938983493013	Isg20	interferon-stimulated protein [Source:MGI Symbol;Acc:MGI:1928895]	-	-	-	-	GO:0005634//nucleus;GO:0005730//nucleolus;GO:0005737//cytoplasm;GO:0015030//Cajal body;GO:0016605//PML body	GO:0000175//3'-5'-exoribonuclease activity;GO:0003676//nucleic acid binding;GO:0003723//RNA binding;GO:0004518//nuclease activity;GO:0004527//exonuclease activity;GO:0008310//single-stranded DNA 3'-5' exodeoxyribonuclease activity;GO:0008859//exoribonuclease II activity;GO:0016787//hydrolase activity;GO:0030619//U1 snRNA binding;GO:0030620//U2 snRNA binding;GO:0034511//U3 snoRNA binding;GO:004687…	GO:0000738//DNA catabolic process, exonucleolytic;GO:0002376//immune system process;GO:0006364//rRNA processing;GO:0006401//RNA catabolic process;GO:0009615//response to virus;GO:0045071//negative regulation of viral genome replication;GO:0045087//innate immune response;GO:0051607//defense response to virus;GO:0090503//RNA phosphodiester bond hydrolysis, exonucleolytic
ENSMUST00000000317	1554669.75	1101194	1132200.75	738382.5	988913.75	504566.15625	1262688.16666667	743954.135416667	-0.763212807896147	0.00244066686528196	0.042973919447443	Ckmt1	creatine kinase, mitochondrial 1, ubiquitous [Source:MGI Symbol;Acc:MGI:99441]	Metabolism;Metabolism	Global and overview maps;Amino acid metabolism	ko01100//Metabolic pathways;ko00330//Arginine and proline metabolism	K00933;K00933	GO:0005739//mitochondrion;GO:0005743//mitochondrial inner membrane;GO:0016020//membrane;GO:0043204//perikaryon;GO:0043209//myelin sheath;GO:0044289//contact site	GO:0000166//nucleotide binding;GO:0003824//catalytic activity;GO:0004111//creatine kinase activity;GO:0005515//protein binding;GO:0005524//ATP binding;GO:0016301//kinase activity;GO:0016740//transferase activity;GO:0016772//transferase activity, transferring phosphorus-containing groups;GO:0042802//identical protein binding	GO:0016310//phosphorylation;GO:0032091//negative regulation of protein binding;GO:0043066//negative regulation of apoptotic process;GO:0046314//phosphocreatine biosynthetic process
ENSMUST00000078222	1554669.75	1101194	1132200.75	738382.5	988913.75	504566.15625	1262688.16666667	743954.135416667	-0.763212807896147	0.00244066686528196	0.042973919447443	Ckmt1	creatine kinase, mitochondrial 1, ubiquitous [Source:MGI Symbol;Acc:MGI:99441]	Metabolism;Metabolism	Global and overview maps;Amino acid metabolism	ko01100//Metabolic pathways;ko00330//Arginine and proline metabolism	K00933;K00933	GO:0005739//mitochondrion;GO:0005743//mitochondrial inner membrane;GO:0016020//membrane;GO:0043204//perikaryon;GO:0043209//myelin sheath;GO:0044289//contact site	GO:0000166//nucleotide binding;GO:0003824//catalytic activity;GO:0004111//creatine kinase activity;GO:0005515//protein binding;GO:0005524//ATP binding;GO:0016301//kinase activity;GO:0016740//transferase activity;GO:0016772//transferase activity, transferring phosphorus-containing groups;GO:0042802//identical protein binding	GO:0016310//phosphorylation;GO:0032091//negative regulation of protein binding;GO:0043066//negative regulation of apoptotic process;GO:0046314//phosphocreatine biosynthetic process
ENSMUST00000067853	67330.9375	78518.6640625	51348.390625	128221.0625	128815.6171875	166914.375	65732.6640625	141317.018229167	1.10425285201442	0.00251810632676204	0.0440847959485834	Tmem119	transmembrane protein 119 [Source:MGI Symbol;Acc:MGI:2385228]	-	-	-	-	GO:0005737//cytoplasm;GO:0005783//endoplasmic reticulum;GO:0005789//endoplasmic reticulum membrane;GO:0005886//plasma membrane;GO:0016020//membrane;GO:0016021//integral component of membrane	GO:0005515//protein binding	GO:0001503//ossification;GO:0001649//osteoblast differentiation;GO:0001934//positive regulation of protein phosphorylation;GO:0001958//endochondral ossification;GO:0007283//spermatogenesis;GO:0010628//positive regulation of gene expression;GO:0010832//negative regulation of myotube differentiation;GO:0030154//cell differentiation;GO:0030501//positive regulation of bone mineralization;GO:0031214//…
ENSMUST00000165971	301760.5	251805.859375	360315.5	601870.4375	441638.15625	425053.6875	304627.286458333	489520.760416667	0.684324870847737	0.00254327807244443	0.0443989879408268	Septin10	septin 10 [Source:MGI Symbol;Acc:MGI:1918110]	-	-	-	-	-	GO:0000166//nucleotide binding;GO:0005525//GTP binding	-
ENSMUST00000220156	301760.5	251805.859375	360315.5	601870.4375	441638.15625	425053.6875	304627.286458333	489520.760416667	0.684324870847737	0.00254327807244443	0.0443989879408268	Septin10	septin 10 [Source:MGI Symbol;Acc:MGI:1918110]	-	-	-	-	-	GO:0000166//nucleotide binding;GO:0005525//GTP binding	-
ENSMUST00000037585	600049.875	896311.5	12887.943359375	15537.5341796875	22523.337890625	NA	503083.106119792	19030.4360351562	-4.72441622085966	0.00260129137814121	0.045027987376557	Dennd6a	DENN/MADD domain containing 6A [Source:MGI Symbol;Acc:MGI:2442980]	-	-	-	-	GO:0005737//cytoplasm;GO:0005768//endosome;GO:0043231//intracellular membrane-bounded organelle;GO:0055037//recycling endosome	GO:0005085//guanyl-nucleotide exchange factor activity;GO:0017112//Rab guanyl-nucleotide exchange factor activity	GO:2000049//positive regulation of cell-cell adhesion mediated by cadherin
ENSMUST00000203874	600049.875	896311.5	12887.943359375	15537.5341796875	22523.337890625	NA	503083.106119792	19030.4360351562	-4.72441622085966	0.00260129137814121	0.045027987376557	Dennd6a	DENN/MADD domain containing 6A [Source:MGI Symbol;Acc:MGI:2442980]	-	-	-	-	GO:0005737//cytoplasm;GO:0005768//endosome;GO:0043231//intracellular membrane-bounded organelle;GO:0055037//recycling endosome	GO:0005085//guanyl-nucleotide exchange factor activity;GO:0017112//Rab guanyl-nucleotide exchange factor activity	GO:2000049//positive regulation of cell-cell adhesion mediated by cadherin
ENSMUST00000103369	1842490	746712.625	746746.9375	341334.1875	273316.3125	73666.3984375	1111983.1875	229438.966145833	-2.27695264208491	0.00263777277007315	0.0452714369069839	Igkv12-41	immunoglobulin kappa chain variable 12-41 [Source:MGI Symbol;Acc:MGI:4439772]	-	-	-	-	GO:0005615//extracellular space;GO:0019814//immunoglobulin complex	-	GO:0002250//adaptive immune response;GO:0002376//immune system process;GO:0002377//immunoglobulin production;GO:0006955//immune response
ENSMUST00000022721	18904.861328125	NA	20576.716796875	1	1.2194983959198	1	19740.7890625	1.07316613197327	-14.1670186062618	0.00272750255942748	0.0461721852002256	Cln5	ceroid-lipofuscinosis, neuronal 5 [Source:MGI Symbol;Acc:MGI:2442253]	Cellular Processes	Transport and catabolism	ko04142//Lysosome	K12390	GO:0005623//cell;GO:0005764//lysosome;GO:0005765//lysosomal membrane;GO:0005775//vacuolar lumen;GO:0005783//endoplasmic reticulum;GO:0005794//Golgi apparatus;GO:0005829//cytosol;GO:0016020//membrane;GO:0016021//integral component of membrane;GO:0048471//perinuclear region of cytoplasm	GO:0005515//protein binding;GO:0005537//mannose binding	GO:0006465//signal peptide processing;GO:0007040//lysosome organization;GO:0007042//lysosomal lumen acidification;GO:0007420//brain development;GO:0007601//visual perception;GO:0022008//neurogenesis;GO:0042147//retrograde transport, endosome to Golgi;GO:0070085//glycosylation;GO:1904426//positive regulation of GTP binding
ENSMUST00000076807	19917.875	44799.98046875	46190.24609375	75015.5625	48274.00390625	96082.4765625	36969.3671875	73124.0143229167	0.984014924049073	0.00274160180300027	0.0461896943026096	Pcdhgc3	protocadherin gamma subfamily C, 3 [Source:MGI Symbol;Acc:MGI:1935201]	-	-	-	-	GO:0005886//plasma membrane;GO:0005887//integral component of plasma membrane;GO:0005911//cell-cell junction;GO:0016020//membrane;GO:0016021//integral component of membrane	GO:0005509//calcium ion binding;GO:0046872//metal ion binding	GO:0007155//cell adhesion;GO:0007156//homophilic cell adhesion via plasma membrane adhesion molecules;GO:0016339//calcium-dependent cell-cell adhesion via plasma membrane cell adhesion molecules;GO:0050808//synapse organization
ENSMUST00000081880	269818.75	170598.078125	238625.609375	141561.484375	114813.9453125	160000.578125	226347.479166667	138792.002604167	-0.705614799234012	0.00274361130447321	0.0461896943026096	Lamp3	lysosomal-associated membrane protein 3 [Source:MGI Symbol;Acc:MGI:2441659]	Cellular Processes	Transport and catabolism	ko04142//Lysosome	K06562	GO:0005764//lysosome;GO:0005765//lysosomal membrane;GO:0005769//early endosome;GO:0005886//plasma membrane;GO:0016020//membrane;GO:0016021//integral component of membrane;GO:0030659//cytoplasmic vesicle membrane;GO:0031410//cytoplasmic vesicle;GO:0031902//late endosome membrane;GO:0031982//vesicle;GO:0043231//intracellular membrane-bounded organelle;GO:0048471//perinuclear region of cytoplasm;GO:…	GO:0003674//molecular_function	GO:0002250//adaptive immune response;GO:0002376//immune system process;GO:0010506//regulation of autophagy;GO:0010628//positive regulation of gene expression;GO:0035455//response to interferon-alpha;GO:0043154//negative regulation of cysteine-type endopeptidase activity involved in apoptotic process;GO:0072594//establishment of protein localization to organelle;GO:1901799//negative regulation of …
ENSMUST00000143107	343505.6875	234085.46875	372783.21875	433884.875	373075.25	622091.0625	316791.458333333	476350.395833333	0.5884897512667	0.00285251376227656	0.0475032440899444	Rpl27a	ribosomal protein L27A [Source:MGI Symbol;Acc:MGI:1347076]	Genetic Information Processing	Translation	ko03010//Ribosome	K02900	GO:0005783//endoplasmic reticulum;GO:0005829//cytosol;GO:0005840//ribosome;GO:0015934//large ribosomal subunit;GO:0022625//cytosolic large ribosomal subunit	GO:0003735//structural constituent of ribosome	GO:0006412//translation
