# Supplementary material for: A Combined Transcriptomic and Proteomic Approach to Reveal the Effect of Mogroside V on OVA-Induced Pulmonary Inflammation in Mice
Source: Frontiers journal article supplement (doi:10.3389/fimmu.2022.800143), 2022-03-18
Supplement: Data_Sheet_3.ZIP [file K-vs-C.filter.annot.xls]

id	K-1	K-2	K-3	C-1	C-2	C-3	K_mean	C_mean	log2(fc)	PValue	FDR	Symbol	Description	KEGG_A_class	KEGG_B_class	Pathway	K_ID	GO Component	GO Function	GO Process
ENSMUST00000063062	378215.65625	476008.6875	2226999	19279532	15619464	16532072	1027074.44791667	17143689.3333333	4.06106494688653	1.05443475084755e-17	1.60458608210226e-14	Chil3	chitinase-like 3 [Source:MGI Symbol;Acc:MGI:1330860]	-	-	-	-	GO:0005576//extracellular region;GO:0005634//nucleus;GO:0005635//nuclear envelope;GO:0005737//cytoplasm;GO:0005783//endoplasmic reticulum;GO:0031410//cytoplasmic vesicle;GO:0048237//rough endoplasmic reticulum lumen	GO:0004563//beta-N-acetylhexosaminidase activity;GO:0008061//chitin binding;GO:0016787//hydrolase activity;GO:0016798//hydrolase activity, acting on glycosyl bonds;GO:0030246//carbohydrate binding;GO:0102148//N-acetyl-beta-D-galactosaminidase activity	GO:0000272//polysaccharide catabolic process;GO:0005975//carbohydrate metabolic process;GO:0006032//chitin catabolic process;GO:0006954//inflammatory response;GO:0008152//metabolic process
ENSMUST00000020238	2359310.25	2464745.75	2723453.25	6952792.5	5083150.5	5959095.5	2515836.41666667	5998346.16666667	1.25352666390492	4.12903890092964e-17	5.02669195799174e-14	Hsp90b1	heat shock protein 90, beta (Grp94), member 1 [Source:MGI Symbol;Acc:MGI:98817]	Human Diseases;Environmental Information Processing;Human Diseases;Genetic Information Processing;Human Diseases;Organismal Systems;Human Diseases;Organismal Systems;Organismal Systems	Cancers;Signal transduction;Infectious diseases;Folding, sorting and degradation;Cardiovascular diseases;Endocrine system;Cancers;Immune system;Endocrine system	ko05200//Pathways in cancer;ko04151//PI3K-Akt signaling pathway;ko05132//Salmonella infection;ko04141//Protein processing in endoplasmic reticulum;ko05418//Fluid shear stress and atherosclerosis;ko04915//Estrogen signaling pathway;ko05215//Prostate cancer;ko04657//IL-17 signaling pathway;ko04918//Thyroid hormone synthesis	K09487;K09487;K09487;K09487;K09487;K09487;K09487;K09487;K09487	GO:0005576//extracellular region;GO:0005783//endoplasmic reticulum;GO:0005788//endoplasmic reticulum lumen;GO:0005789//endoplasmic reticulum membrane;GO:0005790//smooth endoplasmic reticulum;GO:0005829//cytosol;GO:0005886//plasma membrane;GO:0016529//sarcoplasmic reticulum;GO:0030496//midbody;GO:0032991//protein-containing complex;GO:0033018//sarcoplasmic reticulum lumen;GO:0034663//endoplasmic r…	GO:0000166//nucleotide binding;GO:0003723//RNA binding;GO:0005515//protein binding;GO:0005524//ATP binding;GO:0019903//protein phosphatase binding;GO:0050750//low-density lipoprotein particle receptor binding;GO:0051082//unfolded protein binding	GO:0001666//response to hypoxia;GO:0006457//protein folding;GO:0030433//ubiquitin-dependent ERAD pathway;GO:0030970//retrograde protein transport, ER to cytosol;GO:0031247//actin rod assembly;GO:0043066//negative regulation of apoptotic process;GO:0043666//regulation of phosphoprotein phosphatase activity;GO:0071318//cellular response to ATP
ENSMUST00000049460	295839.25	303429.875	389626.03125	632026.6875	692218	596192.6875	329631.71875	640145.791666667	0.957545440605604	2.15107182872435e-16	2.18226237024086e-13	Grn	granulin [Source:MGI Symbol;Acc:MGI:95832]	-	-	-	-	GO:0005576//extracellular region;GO:0005615//extracellular space;GO:0005623//cell;GO:0005764//lysosome;GO:0005765//lysosomal membrane;GO:0005768//endosome;GO:0005770//late endosome;GO:0005783//endoplasmic reticulum;GO:0005794//Golgi apparatus;GO:0005886//plasma membrane;GO:0016020//membrane	GO:0051087//chaperone binding	GO:0007041//lysosomal transport;GO:0007042//lysosomal lumen acidification;GO:0030335//positive regulation of cell migration;GO:0043524//negative regulation of neuron apoptotic process;GO:0050679//positive regulation of epithelial cell proliferation;GO:0050821//protein stabilization;GO:0060266//negative regulation of respiratory burst involved in inflammatory response;GO:1902564//negative regulati…
ENSMUST00000239431	295839.25	303429.875	389626.03125	632026.6875	692218	596192.6875	329631.71875	640145.791666667	0.957545440605604	2.15107182872435e-16	2.18226237024086e-13	Grn	granulin [Source:MGI Symbol;Acc:MGI:95832]	-	-	-	-	GO:0005576//extracellular region;GO:0005615//extracellular space;GO:0005623//cell;GO:0005739//mitochondrion;GO:0005764//lysosome;GO:0005765//lysosomal membrane;GO:0005768//endosome;GO:0005770//late endosome;GO:0005783//endoplasmic reticulum;GO:0005794//Golgi apparatus;GO:0005802//trans-Golgi network;GO:0005886//plasma membrane;GO:0016020//membrane;GO:0031982//vesicle;GO:0098793//presynapse	GO:0005125//cytokine activity;GO:0005515//protein binding;GO:0051087//chaperone binding	GO:0001835//blastocyst hatching;GO:0002265//astrocyte activation involved in immune response;GO:0002282//microglial cell activation involved in immune response;GO:0007040//lysosome organization;GO:0007041//lysosomal transport;GO:0007042//lysosomal lumen acidification;GO:0007165//signal transduction;GO:0007566//embryo implantation;GO:0008284//positive regulation of cell proliferation;GO:0010595//p…
ENSMUST00000018637	1226412.125	509047.8125	478809.4375	1015495.5	817981.6875	1713565	738089.791666667	1182347.39583333	0.679785746778437	4.8888706759302e-16	4.25122225776959e-13	Myh1	myosin, heavy polypeptide 1, skeletal muscle, adult [Source:MGI Symbol;Acc:MGI:1339711]	Human Diseases;Cellular Processes	Infectious diseases;Cellular community - eukaryotes	ko05132//Salmonella infection;ko04530//Tight junction	K10352;K10352	GO:0005737//cytoplasm;GO:0005859//muscle myosin complex;GO:0014704//intercalated disc;GO:0016459//myosin complex;GO:0030016//myofibril;GO:0031672//A band;GO:0032982//myosin filament;GO:0036464//cytoplasmic ribonucleoprotein granule	GO:0000166//nucleotide binding;GO:0003774//motor activity;GO:0003779//actin binding;GO:0005515//protein binding;GO:0005516//calmodulin binding;GO:0005524//ATP binding;GO:0051015//actin filament binding	GO:0006936//muscle contraction
ENSMUST00000075734	1226412.125	509047.8125	478809.4375	1015495.5	817981.6875	1713565	738089.791666667	1182347.39583333	0.679785746778437	4.8888706759302e-16	4.25122225776959e-13	Myh1	myosin, heavy polypeptide 1, skeletal muscle, adult [Source:MGI Symbol;Acc:MGI:1339711]	Human Diseases;Cellular Processes	Infectious diseases;Cellular community - eukaryotes	ko05132//Salmonella infection;ko04530//Tight junction	K10352;K10352	GO:0005737//cytoplasm;GO:0005859//muscle myosin complex;GO:0014704//intercalated disc;GO:0016459//myosin complex;GO:0030016//myofibril;GO:0031672//A band;GO:0032982//myosin filament;GO:0036464//cytoplasmic ribonucleoprotein granule	GO:0000166//nucleotide binding;GO:0003774//motor activity;GO:0003779//actin binding;GO:0005515//protein binding;GO:0005516//calmodulin binding;GO:0005524//ATP binding;GO:0051015//actin filament binding	GO:0006936//muscle contraction
ENSMUST00000124516	1226412.125	509047.8125	478809.4375	1015495.5	817981.6875	1713565	738089.791666667	1182347.39583333	0.679785746778437	4.8888706759302e-16	4.25122225776959e-13	Myh1	myosin, heavy polypeptide 1, skeletal muscle, adult [Source:MGI Symbol;Acc:MGI:1339711]	Human Diseases;Cellular Processes	Infectious diseases;Cellular community - eukaryotes	ko05132//Salmonella infection;ko04530//Tight junction	K10352;K10352	GO:0005737//cytoplasm;GO:0005859//muscle myosin complex;GO:0014704//intercalated disc;GO:0016459//myosin complex;GO:0030016//myofibril;GO:0031672//A band;GO:0032982//myosin filament;GO:0036464//cytoplasmic ribonucleoprotein granule	GO:0000166//nucleotide binding;GO:0003774//motor activity;GO:0003779//actin binding;GO:0005515//protein binding;GO:0005516//calmodulin binding;GO:0005524//ATP binding;GO:0051015//actin filament binding	GO:0006936//muscle contraction
ENSMUST00000190193	453037.15625	193599.484375	110423.96875	478457.71875	473927.40625	3026351.25	252353.536458333	1326245.45833333	2.39382960102457	3.53628203551907e-15	2.69066859377557e-12	Col6a5	collagen, type VI, alpha 5 [Source:MGI Symbol;Acc:MGI:3648134]	Environmental Information Processing;Human Diseases;Cellular Processes;Environmental Information Processing;Organismal Systems	Signal transduction;Infectious diseases;Cellular community - eukaryotes;Signaling molecules and interaction;Digestive system	ko04151//PI3K-Akt signaling pathway;ko05165//Human papillomavirus infection;ko04510//Focal adhesion;ko04512//ECM-receptor interaction;ko04974//Protein digestion and absorption	K06238;K06238;K06238;K06238;K06238	-	-	-
ENSMUST00000028222	3573617	2852793	4105069.75	7705002	6071160	6827104.5	3510493.25	6867755.5	0.968164924663767	1.63552774986473e-13	1.10616193482518e-10	Hspa5	heat shock protein 5 [Source:MGI Symbol;Acc:MGI:95835]	Genetic Information Processing;Organismal Systems;Human Diseases;Genetic Information Processing	Folding, sorting and degradation;Endocrine system;Neurodegenerative diseases;Folding, sorting and degradation	ko04141//Protein processing in endoplasmic reticulum;ko04918//Thyroid hormone synthesis;ko05020//Prion diseases;ko03060//Protein export	K09490;K09490;K09490;K09490	GO:0005576//extracellular region;GO:0005634//nucleus;GO:0005737//cytoplasm;GO:0005739//mitochondrion;GO:0005783//endoplasmic reticulum;GO:0005788//endoplasmic reticulum lumen;GO:0005789//endoplasmic reticulum membrane;GO:0005790//smooth endoplasmic reticulum;GO:0005793//endoplasmic reticulum-Golgi intermediate compartment;GO:0005829//cytosol;GO:0005886//plasma membrane;GO:0008180//COP9 signalosom…	GO:0000166//nucleotide binding;GO:0005515//protein binding;GO:0005524//ATP binding;GO:0016787//hydrolase activity;GO:0016887//ATPase activity;GO:0019899//enzyme binding;GO:0019904//protein domain specific binding;GO:0031072//heat shock protein binding;GO:0031625//ubiquitin protein ligase binding;GO:0042623//ATPase activity, coupled;GO:0043022//ribosome binding;GO:0044183//protein binding involved…	GO:0001554//luteolysis;GO:0006983//ER overload response;GO:0006986//response to unfolded protein;GO:0009314//response to radiation;GO:0010976//positive regulation of neuron projection development;GO:0021589//cerebellum structural organization;GO:0021680//cerebellar Purkinje cell layer development;GO:0030182//neuron differentiation;GO:0030335//positive regulation of cell migration;GO:0030433//ubiq…
ENSMUST00000100171	3573617	2852793	4105069.75	7705002	6071160	6827104.5	3510493.25	6867755.5	0.968164924663767	1.63552774986473e-13	1.10616193482518e-10	Hspa5	heat shock protein 5 [Source:MGI Symbol;Acc:MGI:95835]	Genetic Information Processing;Organismal Systems;Human Diseases;Genetic Information Processing	Folding, sorting and degradation;Endocrine system;Neurodegenerative diseases;Folding, sorting and degradation	ko04141//Protein processing in endoplasmic reticulum;ko04918//Thyroid hormone synthesis;ko05020//Prion diseases;ko03060//Protein export	K09490;K09490;K09490;K09490	GO:0005576//extracellular region;GO:0005634//nucleus;GO:0005737//cytoplasm;GO:0005739//mitochondrion;GO:0005783//endoplasmic reticulum;GO:0005788//endoplasmic reticulum lumen;GO:0005789//endoplasmic reticulum membrane;GO:0005790//smooth endoplasmic reticulum;GO:0005793//endoplasmic reticulum-Golgi intermediate compartment;GO:0005829//cytosol;GO:0005886//plasma membrane;GO:0008180//COP9 signalosom…	GO:0000166//nucleotide binding;GO:0005515//protein binding;GO:0005524//ATP binding;GO:0016787//hydrolase activity;GO:0016887//ATPase activity;GO:0019899//enzyme binding;GO:0019904//protein domain specific binding;GO:0031072//heat shock protein binding;GO:0031625//ubiquitin protein ligase binding;GO:0042623//ATPase activity, coupled;GO:0043022//ribosome binding;GO:0044183//protein binding involved…	GO:0006983//ER overload response;GO:0006986//response to unfolded protein;GO:0010976//positive regulation of neuron projection development;GO:0021589//cerebellum structural organization;GO:0021680//cerebellar Purkinje cell layer development;GO:0030335//positive regulation of cell migration;GO:0030433//ubiquitin-dependent ERAD pathway;GO:0030512//negative regulation of transforming growth factor b…
ENSMUST00000066601	661304.125	475415.71875	681779.625	850401.375	933080.1875	1185610.25	606166.489583333	989697.270833333	0.707273201790506	4.93921827572533e-13	2.7331837858491e-10	Hyou1	hypoxia up-regulated 1 [Source:MGI Symbol;Acc:MGI:108030]	Genetic Information Processing	Folding, sorting and degradation	ko04141//Protein processing in endoplasmic reticulum	K09486	GO:0005576//extracellular region;GO:0005783//endoplasmic reticulum;GO:0005788//endoplasmic reticulum lumen;GO:0005790//smooth endoplasmic reticulum;GO:0034663//endoplasmic reticulum chaperone complex	GO:0000166//nucleotide binding;GO:0005524//ATP binding	GO:0001666//response to hypoxia;GO:0002931//response to ischemia;GO:0006888//ER to Golgi vesicle-mediated transport;GO:0043066//negative regulation of apoptotic process;GO:0071456//cellular response to hypoxia;GO:1903298//negative regulation of hypoxia-induced intrinsic apoptotic signaling pathway;GO:1903382//negative regulation of endoplasmic reticulum stress-induced neuron intrinsic apoptotic s…
ENSMUST00000160902	661304.125	475415.71875	681779.625	850401.375	933080.1875	1185610.25	606166.489583333	989697.270833333	0.707273201790506	4.93921827572533e-13	2.7331837858491e-10	Hyou1	hypoxia up-regulated 1 [Source:MGI Symbol;Acc:MGI:108030]	Genetic Information Processing	Folding, sorting and degradation	ko04141//Protein processing in endoplasmic reticulum	K09486	GO:0005576//extracellular region;GO:0005783//endoplasmic reticulum;GO:0005788//endoplasmic reticulum lumen;GO:0005790//smooth endoplasmic reticulum;GO:0034663//endoplasmic reticulum chaperone complex	GO:0000166//nucleotide binding;GO:0005524//ATP binding	GO:0001666//response to hypoxia;GO:0002931//response to ischemia;GO:0006888//ER to Golgi vesicle-mediated transport;GO:0043066//negative regulation of apoptotic process;GO:0071456//cellular response to hypoxia;GO:1903298//negative regulation of hypoxia-induced intrinsic apoptotic signaling pathway;GO:1903382//negative regulation of endoplasmic reticulum stress-induced neuron intrinsic apoptotic s…
ENSMUST00000161318	661304.125	475415.71875	681779.625	850401.375	933080.1875	1185610.25	606166.489583333	989697.270833333	0.707273201790506	4.93921827572533e-13	2.7331837858491e-10	Hyou1	hypoxia up-regulated 1 [Source:MGI Symbol;Acc:MGI:108030]	Genetic Information Processing	Folding, sorting and degradation	ko04141//Protein processing in endoplasmic reticulum	K09486	GO:0005576//extracellular region;GO:0005783//endoplasmic reticulum;GO:0005788//endoplasmic reticulum lumen;GO:0005790//smooth endoplasmic reticulum;GO:0034663//endoplasmic reticulum chaperone complex	GO:0000166//nucleotide binding;GO:0005524//ATP binding	GO:0001666//response to hypoxia;GO:0002931//response to ischemia;GO:0006888//ER to Golgi vesicle-mediated transport;GO:0034976//response to endoplasmic reticulum stress;GO:0043066//negative regulation of apoptotic process;GO:0071456//cellular response to hypoxia;GO:1903298//negative regulation of hypoxia-induced intrinsic apoptotic signaling pathway;GO:1903382//negative regulation of endoplasmic …
ENSMUST00000028233	221091.46875	135614.4375	129905.84375	410185.21875	689526.5	684102.125	162203.916666667	594604.614583333	1.87412200359937	7.7421464562583e-13	3.68821362636298e-10	Hc	hemolytic complement [Source:MGI Symbol;Acc:MGI:96031]	Human Diseases;Human Diseases;Human Diseases;Organismal Systems;Human Diseases;Environmental Information Processing;Human Diseases	Infectious diseases;Immune diseases;Infectious diseases;Immune system;Infectious diseases;Signaling molecules and interaction;Neurodegenerative diseases	ko05168//Herpes simplex infection;ko05322//Systemic lupus erythematosus;ko05150//Staphylococcus aureus infection;ko04610//Complement and coagulation cascades;ko05133//Pertussis;ko04080//Neuroactive ligand-receptor interaction;ko05020//Prion diseases	K03994;K03994;K03994;K03994;K03994;K03994;K03994	GO:0005576//extracellular region;GO:0005579//membrane attack complex;GO:0005615//extracellular space	GO:0004866//endopeptidase inhibitor activity;GO:0005515//protein binding	GO:0001701//in utero embryonic development;GO:0002376//immune system process;GO:0006954//inflammatory response;GO:0006957//complement activation, alternative pathway;GO:0006958//complement activation, classical pathway;GO:0010575//positive regulation of vascular endothelial growth factor production;GO:0010760//negative regulation of macrophage chemotaxis;GO:0010951//negative regulation of endopep…
ENSMUST00000103420	815773	264306.71875	2874609.5	14292690	7233836.5	15078260	1318229.73958333	12201595.5	3.21039608059182	1.82187628310776e-12	7.92125781091212e-10	Ighg1	immunoglobulin heavy constant gamma 1 (G1m marker) [Source:MGI Symbol;Acc:MGI:96446]	Environmental Information Processing;Human Diseases;Human Diseases;Environmental Information Processing;Cellular Processes;Organismal Systems;Environmental Information Processing;Human Diseases;Human Diseases;Environmental Information Processing;Human Diseases;Human Diseases;Organismal Systems;Organismal Systems;Human Diseases;Organismal Systems;Human Diseases;Organismal Systems;Human Diseases;Hu…	Signal transduction;Infectious diseases;Infectious diseases;Signal transduction;Transport and catabolism;Immune system;Signal transduction;Cancers;Immune diseases;Signal transduction;Cardiovascular diseases;Infectious diseases;Immune system;Immune system;Cardiovascular diseases;Immune system;Infectious diseases;Immune system;Immune diseases;Infectious diseases;Infectious diseases;Infectious disea…	ko04151//PI3K-Akt signaling pathway;ko05169//Epstein-Barr virus infection;ko05152//Tuberculosis;ko04072//Phospholipase D signaling pathway;ko04145//Phagosome;ko04666//Fc gamma R-mediated phagocytosis;ko04020//Calcium signaling pathway;ko05202//Transcriptional misregulation in cancers;ko05322//Systemic lupus erythematosus;ko04064//NF-kappa B signaling pathway;ko05414//Dilated cardiomyopathy (DCM);…	K06856;K06856;K06856;K06856;K06856;K06856;K06856;K06856;K06856;K06856;K06856;K06856;K06856;K06856;K06856;K06856;K06856;K06856;K06856;K06856;K06856;K06856;K06856;K06856;K06856;K06856;K06856	-	-	-
ENSMUST00000194304	815773	264306.71875	2874609.5	14292690	7233836.5	15078260	1318229.73958333	12201595.5	3.21039608059182	1.82187628310776e-12	7.92125781091212e-10	Ighg1	immunoglobulin heavy constant gamma 1 (G1m marker) [Source:MGI Symbol;Acc:MGI:96446]	Environmental Information Processing;Human Diseases;Human Diseases;Environmental Information Processing;Cellular Processes;Organismal Systems;Environmental Information Processing;Human Diseases;Human Diseases;Environmental Information Processing;Human Diseases;Human Diseases;Organismal Systems;Organismal Systems;Human Diseases;Organismal Systems;Human Diseases;Organismal Systems;Human Diseases;Hu…	Signal transduction;Infectious diseases;Infectious diseases;Signal transduction;Transport and catabolism;Immune system;Signal transduction;Cancers;Immune diseases;Signal transduction;Cardiovascular diseases;Infectious diseases;Immune system;Immune system;Cardiovascular diseases;Immune system;Infectious diseases;Immune system;Immune diseases;Infectious diseases;Infectious diseases;Infectious disea…	ko04151//PI3K-Akt signaling pathway;ko05169//Epstein-Barr virus infection;ko05152//Tuberculosis;ko04072//Phospholipase D signaling pathway;ko04145//Phagosome;ko04666//Fc gamma R-mediated phagocytosis;ko04020//Calcium signaling pathway;ko05202//Transcriptional misregulation in cancers;ko05322//Systemic lupus erythematosus;ko04064//NF-kappa B signaling pathway;ko05414//Dilated cardiomyopathy (DCM);…	K06856;K06856;K06856;K06856;K06856;K06856;K06856;K06856;K06856;K06856;K06856;K06856;K06856;K06856;K06856;K06856;K06856;K06856;K06856;K06856;K06856;K06856;K06856;K06856;K06856;K06856;K06856	GO:0016020//membrane;GO:0016021//integral component of membrane	-	-
ENSMUST00000019068	367089.5625	401362.34375	442808.0625	1073596.5	415818.3125	590086.125	403753.322916667	693166.979166667	0.779728796228411	2.6133349096432e-12	1.01176081288396e-09	Alox15	arachidonate 15-lipoxygenase [Source:MGI Symbol;Acc:MGI:87997]	Metabolism;Cellular Processes;Organismal Systems;Cellular Processes;Metabolism;Metabolism	Global and overview maps;Cell growth and death;Nervous system;Cell growth and death;Lipid metabolism;Lipid metabolism	ko01100//Metabolic pathways;ko04217//Necroptosis;ko04726//Serotonergic synapse;ko04216//Ferroptosis;ko00590//Arachidonic acid metabolism;ko00591//Linoleic acid metabolism	K00460;K00460;K00460;K00460;K00460;K00460	GO:0005737//cytoplasm;GO:0005811//lipid droplet;GO:0005829//cytosol;GO:0005886//plasma membrane;GO:0016020//membrane;GO:0031234//extrinsic component of cytoplasmic side of plasma membrane	GO:0004052//arachidonate 12-lipoxygenase activity;GO:0005506//iron ion binding;GO:0005515//protein binding;GO:0005546//phosphatidylinositol-4,5-bisphosphate binding;GO:0008289//lipid binding;GO:0016165//linoleate 13S-lipoxygenase activity;GO:0016491//oxidoreductase activity;GO:0016702//oxidoreductase activity, acting on single donors with incorporation of molecular oxygen, incorporation of two at…	GO:0001503//ossification;GO:0002820//negative regulation of adaptive immune response;GO:0006629//lipid metabolic process;GO:0006631//fatty acid metabolic process;GO:0006646//phosphatidylethanolamine biosynthetic process;GO:0010811//positive regulation of cell-substrate adhesion;GO:0019369//arachidonic acid metabolic process;GO:0019372//lipoxygenase pathway;GO:0019395//fatty acid oxidation;GO:0030…
ENSMUST00000070968	646129.375	375009.96875	327715.59375	1021282.4375	859555	1203564	449618.3125	1028133.8125	1.19325534337158	2.6594665691052e-12	1.01176081288396e-09	Stat1	signal transducer and activator of transcription 1 [Source:MGI Symbol;Acc:MGI:103063]	Human Diseases;Human Diseases;Human Diseases;Human Diseases;Human Diseases;Human Diseases;Organismal Systems;Organismal Systems;Human Diseases;Human Diseases;Human Diseases;Human Diseases;Cellular Processes;Human Diseases;Organismal Systems;Human Diseases;Organismal Systems;Organismal Systems;Organismal Systems;Human Diseases;Human Diseases;Organismal Systems;Organismal Systems;Human Diseases;Env…	Cancers;Infectious diseases;Infectious diseases;Infectious diseases;Infectious diseases;Infectious diseases;Immune system;Immune system;Infectious diseases;Infectious diseases;Infectious diseases;Infectious diseases;Cell growth and death;Infectious diseases;Endocrine system;Infectious diseases;Development;Immune system;Endocrine system;Endocrine and metabolic diseases;Cancers;Immune system;Immune…	ko05200//Pathways in cancer;ko05165//Human papillomavirus infection;ko05169//Epstein-Barr virus infection;ko05152//Tuberculosis;ko05168//Herpes simplex infection;ko05167//Kaposi sarcoma-associated herpesvirus infection;ko04062//Chemokine signaling pathway;ko04621//NOD-like receptor signaling pathway;ko05161//Hepatitis B;ko05164//Influenza A;ko05160//Hepatitis C;ko05162//Measles;ko04217//Necroptos…	K11220;K11220;K11220;K11220;K11220;K11220;K11220;K11220;K11220;K11220;K11220;K11220;K11220;K11220;K11220;K11220;K11220;K11220;K11220;K11220;K11220;K11220;K11220;K11220;K11220;K11220;K11220;K11220	GO:0005634//nucleus;GO:0005737//cytoplasm	GO:0003677//DNA binding;GO:0003700//DNA-binding transcription factor activity	GO:0006355//regulation of transcription, DNA-templated;GO:0007165//signal transduction
ENSMUST00000186057	646129.375	375009.96875	327715.59375	1021282.4375	859555	1203564	449618.3125	1028133.8125	1.19325534337158	2.6594665691052e-12	1.01176081288396e-09	Stat1	signal transducer and activator of transcription 1 [Source:MGI Symbol;Acc:MGI:103063]	Human Diseases;Human Diseases;Human Diseases;Human Diseases;Human Diseases;Human Diseases;Organismal Systems;Organismal Systems;Human Diseases;Human Diseases;Human Diseases;Human Diseases;Cellular Processes;Human Diseases;Organismal Systems;Human Diseases;Organismal Systems;Organismal Systems;Organismal Systems;Human Diseases;Human Diseases;Organismal Systems;Organismal Systems;Human Diseases;Env…	Cancers;Infectious diseases;Infectious diseases;Infectious diseases;Infectious diseases;Infectious diseases;Immune system;Immune system;Infectious diseases;Infectious diseases;Infectious diseases;Infectious diseases;Cell growth and death;Infectious diseases;Endocrine system;Infectious diseases;Development;Immune system;Endocrine system;Endocrine and metabolic diseases;Cancers;Immune system;Immune…	ko05200//Pathways in cancer;ko05165//Human papillomavirus infection;ko05169//Epstein-Barr virus infection;ko05152//Tuberculosis;ko05168//Herpes simplex infection;ko05167//Kaposi sarcoma-associated herpesvirus infection;ko04062//Chemokine signaling pathway;ko04621//NOD-like receptor signaling pathway;ko05161//Hepatitis B;ko05164//Influenza A;ko05160//Hepatitis C;ko05162//Measles;ko04217//Necroptos…	K11220;K11220;K11220;K11220;K11220;K11220;K11220;K11220;K11220;K11220;K11220;K11220;K11220;K11220;K11220;K11220;K11220;K11220;K11220;K11220;K11220;K11220;K11220;K11220;K11220;K11220;K11220;K11220	GO:0000790//nuclear chromatin;GO:0005634//nucleus;GO:0005654//nucleoplasm;GO:0005730//nucleolus;GO:0005737//cytoplasm;GO:0005829//cytosol;GO:0032991//protein-containing complex;GO:0048471//perinuclear region of cytoplasm	GO:0000978//RNA polymerase II proximal promoter sequence-specific DNA binding;GO:0000979//RNA polymerase II core promoter sequence-specific DNA binding;GO:0000981//DNA-binding transcription factor activity, RNA polymerase II-specific;GO:0003677//DNA binding;GO:0003690//double-stranded DNA binding;GO:0003700//DNA-binding transcription factor activity;GO:0005164//tumor necrosis factor receptor bind…	GO:0001937//negative regulation of endothelial cell proliferation;GO:0002230//positive regulation of defense response to virus by host;GO:0006355//regulation of transcription, DNA-templated;GO:0007165//signal transduction;GO:0007259//JAK-STAT cascade;GO:0010742//macrophage derived foam cell differentiation;GO:0016525//negative regulation of angiogenesis;GO:0032727//positive regulation of interfer…
ENSMUST00000186857	646129.375	375009.96875	327715.59375	1021282.4375	859555	1203564	449618.3125	1028133.8125	1.19325534337158	2.6594665691052e-12	1.01176081288396e-09	Stat1	signal transducer and activator of transcription 1 [Source:MGI Symbol;Acc:MGI:103063]	Human Diseases;Human Diseases;Human Diseases;Human Diseases;Human Diseases;Human Diseases;Organismal Systems;Organismal Systems;Human Diseases;Human Diseases;Human Diseases;Human Diseases;Cellular Processes;Human Diseases;Organismal Systems;Human Diseases;Organismal Systems;Organismal Systems;Organismal Systems;Human Diseases;Human Diseases;Organismal Systems;Organismal Systems;Human Diseases;Env…	Cancers;Infectious diseases;Infectious diseases;Infectious diseases;Infectious diseases;Infectious diseases;Immune system;Immune system;Infectious diseases;Infectious diseases;Infectious diseases;Infectious diseases;Cell growth and death;Infectious diseases;Endocrine system;Infectious diseases;Development;Immune system;Endocrine system;Endocrine and metabolic diseases;Cancers;Immune system;Immune…	ko05200//Pathways in cancer;ko05165//Human papillomavirus infection;ko05169//Epstein-Barr virus infection;ko05152//Tuberculosis;ko05168//Herpes simplex infection;ko05167//Kaposi sarcoma-associated herpesvirus infection;ko04062//Chemokine signaling pathway;ko04621//NOD-like receptor signaling pathway;ko05161//Hepatitis B;ko05164//Influenza A;ko05160//Hepatitis C;ko05162//Measles;ko04217//Necroptos…	K11220;K11220;K11220;K11220;K11220;K11220;K11220;K11220;K11220;K11220;K11220;K11220;K11220;K11220;K11220;K11220;K11220;K11220;K11220;K11220;K11220;K11220;K11220;K11220;K11220;K11220;K11220;K11220	GO:0005634//nucleus;GO:0005737//cytoplasm	GO:0003677//DNA binding;GO:0003700//DNA-binding transcription factor activity	GO:0006355//regulation of transcription, DNA-templated;GO:0007165//signal transduction
ENSMUST00000029046	1784376.625	1591696.375	2146229.25	3803966.75	3140242.5	5059746.5	1840767.41666667	4001318.58333333	1.12016814821317	3.05233011366773e-12	1.09291372952326e-09	Fabp5	fatty acid binding protein 5, epidermal [Source:MGI Symbol;Acc:MGI:101790]	Organismal Systems	Endocrine system	ko03320//PPAR signaling pathway	K08754	GO:0005576//extracellular region;GO:0005615//extracellular space;GO:0005634//nucleus;GO:0005737//cytoplasm;GO:0014069//postsynaptic density;GO:0030054//cell junction;GO:0045202//synapse	GO:0001972//retinoic acid binding;GO:0005504//fatty acid binding;GO:0008289//lipid binding;GO:0042802//identical protein binding	GO:0006006//glucose metabolic process;GO:0006629//lipid metabolic process;GO:0006656//phosphatidylcholine biosynthetic process;GO:0010829//negative regulation of glucose transmembrane transport;GO:0031392//regulation of prostaglandin biosynthetic process;GO:0035360//positive regulation of peroxisome proliferator activated receptor signaling pathway;GO:0042593//glucose homeostasis;GO:0051930//regu…
ENSMUST00000071044	536987.5625	648375.3125	864797.375	1906003.25	1358354.25	1473799.25	683386.75	1579385.58333333	1.20858924545479	3.27512517781072e-12	1.10753816429633e-09	Capg	capping protein (actin filament), gelsolin-like [Source:MGI Symbol;Acc:MGI:1098259]	-	-	-	-	-	GO:0051015//actin filament binding	GO:0051016//barbed-end actin filament capping
ENSMUST00000114071	536987.5625	648375.3125	864797.375	1906003.25	1358354.25	1473799.25	683386.75	1579385.58333333	1.20858924545479	3.27512517781072e-12	1.10753816429633e-09	Capg	capping protein (actin filament), gelsolin-like [Source:MGI Symbol;Acc:MGI:1098259]	-	-	-	-	GO:0005634//nucleus;GO:0005654//nucleoplasm;GO:0005730//nucleolus;GO:0005737//cytoplasm;GO:0005814//centriole;GO:0072686//mitotic spindle;GO:0090543//Flemming body	GO:0019904//protein domain specific binding;GO:0044877//protein-containing complex binding;GO:0051015//actin filament binding	GO:0051016//barbed-end actin filament capping
ENSMUST00000114072	536987.5625	648375.3125	864797.375	1906003.25	1358354.25	1473799.25	683386.75	1579385.58333333	1.20858924545479	3.27512517781072e-12	1.10753816429633e-09	Capg	capping protein (actin filament), gelsolin-like [Source:MGI Symbol;Acc:MGI:1098259]	-	-	-	-	-	GO:0051015//actin filament binding	GO:0051016//barbed-end actin filament capping
ENSMUST00000020161	68922.9140625	25992.4453125	55882.56640625	1032542	408764.25	274903.65625	50265.9752604167	572069.96875	3.50853752716555	7.54037794450309e-12	2.18563240705668e-09	Arg1	arginase, liver [Source:MGI Symbol;Acc:MGI:88070]	Metabolism;Human Diseases;Metabolism;Metabolism;Metabolism	Global and overview maps;Infectious diseases;Global and overview maps;Amino acid metabolism;Amino acid metabolism	ko01100//Metabolic pathways;ko05146//Amoebiasis;ko01230//Biosynthesis of amino acids;ko00330//Arginine and proline metabolism;ko00220//Arginine biosynthesis	K01476;K01476;K01476;K01476;K01476	GO:0005615//extracellular space;GO:0005737//cytoplasm;GO:0005741//mitochondrial outer membrane;GO:0005829//cytosol;GO:0043005//neuron projection;GO:0043025//neuronal cell body	GO:0004053//arginase activity;GO:0016787//hydrolase activity;GO:0016813//hydrolase activity, acting on carbon-nitrogen (but not peptide) bonds, in linear amidines;GO:0030145//manganese ion binding;GO:0042802//identical protein binding;GO:0046872//metal ion binding	GO:0000050//urea cycle;GO:0001889//liver development;GO:0001938//positive regulation of endothelial cell proliferation;GO:0002250//adaptive immune response;GO:0002376//immune system process;GO:0006525//arginine metabolic process;GO:0007565//female pregnancy;GO:0007568//aging;GO:0009611//response to wounding;GO:0009635//response to herbicide;GO:0010042//response to manganese ion;GO:0010043//respon…
ENSMUST00000033185	3745867	3110708.5	4756617	4857761	7593258	11245700	3871064.16666667	7898906.33333333	1.02892269255983	1.68951378411207e-11	4.47133495821312e-09	Hpx	hemopexin [Source:MGI Symbol;Acc:MGI:105112]	-	-	-	-	GO:0005576//extracellular region;GO:0005615//extracellular space;GO:0005623//cell	GO:0015232//heme transporter activity;GO:0020037//heme binding;GO:0046872//metal ion binding	GO:0002639//positive regulation of immunoglobulin production;GO:0002925//positive regulation of humoral immune response mediated by circulating immunoglobulin;GO:0006879//cellular iron ion homeostasis;GO:0015886//heme transport;GO:0020027//hemoglobin metabolic process;GO:0042168//heme metabolic process;GO:0042531//positive regulation of tyrosine phosphorylation of STAT protein;GO:0051246//regulat…
ENSMUST00000165147	50901.16015625	47293.234375	53270.1328125	256146.3125	241396.28125	211389.765625	50488.17578125	236310.786458333	2.22666802639217	2.01656766185573e-11	5.1145197323816e-09	Muc5b	mucin 5, subtype B, tracheobronchial [Source:MGI Symbol;Acc:MGI:1921430]	Organismal Systems;Organismal Systems	Immune system;Digestive system	ko04657//IL-17 signaling pathway;ko04970//Salivary secretion	K13908;K13908	GO:0005576//extracellular region;GO:0005615//extracellular space;GO:0043231//intracellular membrane-bounded organelle	GO:0003674//molecular_function;GO:0005515//protein binding	GO:0042742//defense response to bacterium;GO:0043030//regulation of macrophage activation
ENSMUST00000029919	242473.34375	180803.25	1367652	3100578	1257856.5	2407140.25	596976.197916667	2255191.58333333	1.91750468276068	3.64093996245758e-11	8.62750234436354e-09	Clca1	chloride channel accessory 1 [Source:MGI Symbol;Acc:MGI:1346342]	Organismal Systems;Organismal Systems	Digestive system;Endocrine system	ko04972//Pancreatic secretion;ko04924//Renin secretion	K05027;K05027	GO:0005576//extracellular region;GO:0005615//extracellular space;GO:0005887//integral component of plasma membrane;GO:0005902//microvillus;GO:0016021//integral component of membrane;GO:0030141//secretory granule;GO:0042589//zymogen granule membrane	GO:0005229//intracellular calcium activated chloride channel activity;GO:0005254//chloride channel activity;GO:0008233//peptidase activity;GO:0008237//metallopeptidase activity;GO:0016787//hydrolase activity;GO:0046872//metal ion binding	GO:0006508//proteolysis;GO:0006811//ion transport;GO:0006816//calcium ion transport;GO:0006821//chloride transport;GO:0071456//cellular response to hypoxia;GO:1902476//chloride transmembrane transport
ENSMUST00000002663	1168893.25	1500427.875	958541.875	338727.1875	451565.4375	470766.9375	1209287.66666667	420353.1875	-1.52448355719907	3.68514967888043e-11	8.62750234436354e-09	Pon1	paraoxonase 1 [Source:MGI Symbol;Acc:MGI:103295]	-	-	-	-	GO:0005576//extracellular region;GO:0005615//extracellular space;GO:0034364//high-density lipoprotein particle;GO:0034366//spherical high-density lipoprotein particle;GO:0043231//intracellular membrane-bounded organelle	GO:0004063//aryldialkylphosphatase activity;GO:0004064//arylesterase activity;GO:0005509//calcium ion binding;GO:0005543//phospholipid binding;GO:0008035//high-density lipoprotein particle binding;GO:0016787//hydrolase activity;GO:0042803//protein homodimerization activity;GO:0046872//metal ion binding;GO:0102007//acyl-L-homoserine-lactone lactonohydrolase activity	GO:0006629//lipid metabolic process;GO:0008015//blood circulation;GO:0008203//cholesterol metabolic process;GO:0009636//response to toxic substance;GO:0010875//positive regulation of cholesterol efflux;GO:0016311//dephosphorylation;GO:0019439//aromatic compound catabolic process;GO:0031667//response to nutrient levels;GO:0032411//positive regulation of transporter activity;GO:0046395//carboxylic …
ENSMUST00000090839	10168400	12838574	6282473	4882828.5	5938347	8302024.5	9763149	6374400	-0.615056996288921	3.85281991570559e-11	8.68596845440739e-09	Selenbp1	selenium binding protein 1 [Source:MGI Symbol;Acc:MGI:96825]	Metabolism;Metabolism	Global and overview maps;Energy metabolism	ko01100//Metabolic pathways;ko00920//Sulfur metabolism	K17285;K17285	GO:0001650//fibrillar center;GO:0005634//nucleus;GO:0005730//nucleolus;GO:0005737//cytoplasm;GO:0005829//cytosol;GO:0016020//membrane	GO:0008430//selenium binding;GO:0016491//oxidoreductase activity;GO:0018549//methanethiol oxidase activity	GO:0015031//protein transport;GO:0050873//brown fat cell differentiation;GO:0055114//oxidation-reduction process
ENSMUST00000089377	5061863.5	5009603	4550272	8233789	6759805	7081486.5	4873912.83333333	7358360.16666667	0.59430384338995	2.04419579317333e-10	4.29069648036071e-08	Lgals1	lectin, galactose binding, soluble 1 [Source:MGI Symbol;Acc:MGI:96777]	-	-	-	-	GO:0005576//extracellular region;GO:0005615//extracellular space;GO:0005623//cell;GO:0005634//nucleus;GO:0005737//cytoplasm;GO:0005829//cytosol;GO:0009986//cell surface;GO:0062023//collagen-containing extracellular matrix	GO:0005515//protein binding;GO:0005534//galactose binding;GO:0030246//carbohydrate binding;GO:0030395//lactose binding;GO:0042802//identical protein binding;GO:0043236//laminin binding	GO:0002317//plasma cell differentiation;GO:0006915//apoptotic process;GO:0007157//heterophilic cell-cell adhesion via plasma membrane cell adhesion molecules;GO:0010812//negative regulation of cell-substrate adhesion;GO:0010977//negative regulation of neuron projection development;GO:0031295//T cell costimulation;GO:0034120//positive regulation of erythrocyte aggregation;GO:0035900//response to i…
ENSMUST00000037907	148486.6875	137457.328125	125988.9609375	226098.53125	206714.78125	298076.625	137310.9921875	243629.979166667	0.827244548243728	2.84914617834391e-10	5.59443638309013e-08	Ddx58	DEAD (Asp-Glu-Ala-Asp) box polypeptide 58 [Source:MGI Symbol;Acc:MGI:2442858]	Human Diseases;Human Diseases;Human Diseases;Environmental Information Processing;Human Diseases;Human Diseases;Human Diseases;Organismal Systems;Organismal Systems	Infectious diseases;Infectious diseases;Infectious diseases;Signal transduction;Infectious diseases;Infectious diseases;Infectious diseases;Immune system;Immune system	ko05169//Epstein-Barr virus infection;ko05168//Herpes simplex infection;ko05161//Hepatitis B;ko04064//NF-kappa B signaling pathway;ko05164//Influenza A;ko05160//Hepatitis C;ko05162//Measles;ko04622//RIG-I-like receptor signaling pathway;ko04623//Cytosolic DNA-sensing pathway	K12646;K12646;K12646;K12646;K12646;K12646;K12646;K12646;K12646	GO:0005737//cytoplasm;GO:0005829//cytosol;GO:0005856//cytoskeleton;GO:0005886//plasma membrane;GO:0005923//bicellular tight junction;GO:0015629//actin cytoskeleton;GO:0016020//membrane;GO:0030054//cell junction;GO:0032587//ruffle membrane;GO:0042995//cell projection;GO:1990904//ribonucleoprotein complex	GO:0000166//nucleotide binding;GO:0003677//DNA binding;GO:0003690//double-stranded DNA binding;GO:0003723//RNA binding;GO:0003724//RNA helicase activity;GO:0003725//double-stranded RNA binding;GO:0003727//single-stranded RNA binding;GO:0004386//helicase activity;GO:0005515//protein binding;GO:0005524//ATP binding;GO:0008270//zinc ion binding;GO:0016787//hydrolase activity;GO:0031625//ubiquitin pr…	GO:0002230//positive regulation of defense response to virus by host;GO:0002376//immune system process;GO:0002735//positive regulation of myeloid dendritic cell cytokine production;GO:0009597//detection of virus;GO:0009615//response to virus;GO:0010628//positive regulation of gene expression;GO:0030334//regulation of cell migration;GO:0032725//positive regulation of granulocyte macrophage colony-…
ENSMUST00000103426	2313737	1839080	4315095.5	13750146	7355135.5	7950769.5	2822637.5	9685350.33333333	1.77876037301602	3.22088091798383e-10	5.94106125689927e-08	Ighm	immunoglobulin heavy constant mu [Source:MGI Symbol;Acc:MGI:96448]	Environmental Information Processing;Human Diseases;Human Diseases;Environmental Information Processing;Cellular Processes;Organismal Systems;Environmental Information Processing;Human Diseases;Human Diseases;Environmental Information Processing;Human Diseases;Human Diseases;Organismal Systems;Organismal Systems;Human Diseases;Organismal Systems;Human Diseases;Organismal Systems;Human Diseases;Hu…	Signal transduction;Infectious diseases;Infectious diseases;Signal transduction;Transport and catabolism;Immune system;Signal transduction;Cancers;Immune diseases;Signal transduction;Cardiovascular diseases;Infectious diseases;Immune system;Immune system;Cardiovascular diseases;Immune system;Infectious diseases;Immune system;Immune diseases;Infectious diseases;Infectious diseases;Infectious disea…	ko04151//PI3K-Akt signaling pathway;ko05169//Epstein-Barr virus infection;ko05152//Tuberculosis;ko04072//Phospholipase D signaling pathway;ko04145//Phagosome;ko04666//Fc gamma R-mediated phagocytosis;ko04020//Calcium signaling pathway;ko05202//Transcriptional misregulation in cancers;ko05322//Systemic lupus erythematosus;ko04064//NF-kappa B signaling pathway;ko05414//Dilated cardiomyopathy (DCM);…	K06856;K06856;K06856;K06856;K06856;K06856;K06856;K06856;K06856;K06856;K06856;K06856;K06856;K06856;K06856;K06856;K06856;K06856;K06856;K06856;K06856;K06856;K06856;K06856;K06856;K06856;K06856	-	-	-
ENSMUST00000087033	89606.828125	64914.89453125	249138.109375	1554778.25	949410.875	973934.25	134553.27734375	1159374.45833333	3.10709717113873	4.46189682124395e-10	7.7545082593998e-08	Jchain	immunoglobulin joining chain [Source:MGI Symbol;Acc:MGI:96493]	-	-	-	-	GO:0005576//extracellular region;GO:0005615//extracellular space;GO:0071748//monomeric IgA immunoglobulin complex;GO:0071750//dimeric IgA immunoglobulin complex;GO:0071751//secretory IgA immunoglobulin complex;GO:0071752//secretory dimeric IgA immunoglobulin complex;GO:0071756//pentameric IgM immunoglobulin complex	GO:0003697//single-stranded DNA binding;GO:0003823//antigen binding;GO:0019862//IgA binding;GO:0030674//protein binding, bridging;GO:0031210//phosphatidylcholine binding;GO:0034987//immunoglobulin receptor binding;GO:0042803//protein homodimerization activity;GO:0042834//peptidoglycan binding	GO:0002250//adaptive immune response;GO:0003094//glomerular filtration;GO:0006959//humoral immune response;GO:0019731//antibacterial humoral response;GO:0045087//innate immune response;GO:0060267//positive regulation of respiratory burst;GO:0065003//protein-containing complex assembly
ENSMUST00000102824	42497.65234375	26607.701171875	35369.0703125	279204.5625	215658.125	356477.625	34824.8079427083	283780.104166667	3.0265861439816	4.58620498338086e-10	7.7545082593998e-08	Ifit1	interferon-induced protein with tetratricopeptide repeats 1 [Source:MGI Symbol;Acc:MGI:99450]	Human Diseases	Infectious diseases	ko05160//Hepatitis C	K14217	GO:0005737//cytoplasm;GO:0005829//cytosol	GO:0003723//RNA binding;GO:0005515//protein binding	GO:0002376//immune system process;GO:0009615//response to virus;GO:0009617//response to bacterium;GO:0035457//cellular response to interferon-alpha;GO:0035458//cellular response to interferon-beta;GO:0045087//innate immune response;GO:0051607//defense response to virus
ENSMUST00000029935	216770.109375	117462.8203125	109278.6328125	394408.0625	317947.5	413587.5	147837.1875	375314.354166667	1.34409025233194	6.93782887697828e-10	1.14136660470721e-07	Gbp3	guanylate binding protein 3 [Source:MGI Symbol;Acc:MGI:1926263]	Organismal Systems	Immune system	ko04621//NOD-like receptor signaling pathway	K20899	GO:0000139//Golgi membrane;GO:0005634//nucleus;GO:0005737//cytoplasm;GO:0005794//Golgi apparatus;GO:0005829//cytosol;GO:0005886//plasma membrane;GO:0016020//membrane;GO:0020005//symbiont-containing vacuole membrane;GO:0031410//cytoplasmic vesicle;GO:0048471//perinuclear region of cytoplasm	GO:0000166//nucleotide binding;GO:0003924//GTPase activity;GO:0005525//GTP binding;GO:0016787//hydrolase activity;GO:0042803//protein homodimerization activity	GO:0035458//cellular response to interferon-beta;GO:0042832//defense response to protozoan;GO:0044406//adhesion of symbiont to host;GO:0050830//defense response to Gram-positive bacterium;GO:0071346//cellular response to interferon-gamma
ENSMUST00000106221	216770.109375	117462.8203125	109278.6328125	394408.0625	317947.5	413587.5	147837.1875	375314.354166667	1.34409025233194	6.93782887697828e-10	1.14136660470721e-07	Gbp3	guanylate binding protein 3 [Source:MGI Symbol;Acc:MGI:1926263]	Organismal Systems	Immune system	ko04621//NOD-like receptor signaling pathway	K20899	GO:0000139//Golgi membrane;GO:0005634//nucleus;GO:0005737//cytoplasm;GO:0005794//Golgi apparatus;GO:0005829//cytosol;GO:0005886//plasma membrane;GO:0016020//membrane;GO:0020005//symbiont-containing vacuole membrane;GO:0031410//cytoplasmic vesicle;GO:0048471//perinuclear region of cytoplasm	GO:0000166//nucleotide binding;GO:0003924//GTPase activity;GO:0005525//GTP binding;GO:0016787//hydrolase activity;GO:0042803//protein homodimerization activity	GO:0035458//cellular response to interferon-beta;GO:0042832//defense response to protozoan;GO:0044406//adhesion of symbiont to host;GO:0050830//defense response to Gram-positive bacterium;GO:0071346//cellular response to interferon-gamma
ENSMUST00000106222	216770.109375	117462.8203125	109278.6328125	394408.0625	317947.5	413587.5	147837.1875	375314.354166667	1.34409025233194	6.93782887697828e-10	1.14136660470721e-07	Gbp3	guanylate binding protein 3 [Source:MGI Symbol;Acc:MGI:1926263]	Organismal Systems	Immune system	ko04621//NOD-like receptor signaling pathway	K20899	GO:0000139//Golgi membrane;GO:0005634//nucleus;GO:0005737//cytoplasm;GO:0005794//Golgi apparatus;GO:0005829//cytosol;GO:0005886//plasma membrane;GO:0016020//membrane;GO:0020005//symbiont-containing vacuole membrane;GO:0031410//cytoplasmic vesicle;GO:0048471//perinuclear region of cytoplasm	GO:0000166//nucleotide binding;GO:0003924//GTPase activity;GO:0005525//GTP binding;GO:0016787//hydrolase activity;GO:0042803//protein homodimerization activity	GO:0035458//cellular response to interferon-beta;GO:0042832//defense response to protozoan;GO:0044406//adhesion of symbiont to host;GO:0050830//defense response to Gram-positive bacterium;GO:0071346//cellular response to interferon-gamma
ENSMUST00000062254	495736.59375	619506.9375	577587.375	230614.546875	309265.1875	321179.28125	564276.96875	287019.671875	-0.975253846126628	2.51769809387433e-09	3.83130707435326e-07	Clec14a	C-type lectin domain family 14, member a [Source:MGI Symbol;Acc:MGI:1914114]	-	-	-	-	GO:0009897//external side of plasma membrane;GO:0016020//membrane;GO:0016021//integral component of membrane;GO:0062023//collagen-containing extracellular matrix	GO:0030246//carbohydrate binding;GO:0050840//extracellular matrix binding;GO:1990430//extracellular matrix protein binding	GO:0002042//cell migration involved in sprouting angiogenesis;GO:0016477//cell migration
ENSMUST00000105465	2582070.75	2401806.5	3647788	10219274	8922190	6907451	2877221.75	8682971.66666667	1.59351246106853	2.70189510642535e-09	4.01132573483198e-07	Psap	prosaposin [Source:MGI Symbol;Acc:MGI:97783]	Cellular Processes	Transport and catabolism	ko04142//Lysosome	K12382	GO:0005615//extracellular space;GO:0005764//lysosome	-	GO:0006629//lipid metabolic process;GO:0006665//sphingolipid metabolic process;GO:0007193//adenylate cyclase-inhibiting G protein-coupled receptor signaling pathway;GO:0019216//regulation of lipid metabolic process;GO:0060736//prostate gland growth;GO:0060742//epithelial cell differentiation involved in prostate gland development
ENSMUST00000165878	2582070.75	2401806.5	3647788	10219274	8922190	6907451	2877221.75	8682971.66666667	1.59351246106853	2.70189510642535e-09	4.01132573483198e-07	Psap	prosaposin [Source:MGI Symbol;Acc:MGI:97783]	Cellular Processes	Transport and catabolism	ko04142//Lysosome	K12382	GO:0005615//extracellular space;GO:0005764//lysosome	-	GO:0006629//lipid metabolic process;GO:0006665//sphingolipid metabolic process;GO:0007193//adenylate cyclase-inhibiting G protein-coupled receptor signaling pathway;GO:0019216//regulation of lipid metabolic process;GO:0060736//prostate gland growth;GO:0060742//epithelial cell differentiation involved in prostate gland development
ENSMUST00000006235	343706.25	373446.96875	550535.125	1279582	875994.625	970098.3125	422562.78125	1041891.64583333	1.30196764130289	3.79991016283094e-09	5.50715551455998e-07	Ctsb	cathepsin B [Source:MGI Symbol;Acc:MGI:88561]	Organismal Systems;Cellular Processes;Cellular Processes;Cellular Processes;Organismal Systems;Organismal Systems	Immune system;Transport and catabolism;Cell growth and death;Transport and catabolism;Immune system;Endocrine system	ko04621//NOD-like receptor signaling pathway;ko04140//Autophagy - animal;ko04210//Apoptosis;ko04142//Lysosome;ko04612//Antigen processing and presentation;ko04924//Renin secretion	K01363;K01363;K01363;K01363;K01363;K01363	GO:0005576//extracellular region;GO:0005615//extracellular space;GO:0005730//nucleolus;GO:0005737//cytoplasm;GO:0005739//mitochondrion;GO:0005764//lysosome;GO:0005886//plasma membrane;GO:0005901//caveola;GO:0009897//external side of plasma membrane;GO:0009986//cell surface;GO:0016020//membrane;GO:0016324//apical plasma membrane;GO:0042383//sarcolemma;GO:0042470//melanosome;GO:0043231//intracellul…	GO:0004175//endopeptidase activity;GO:0004197//cysteine-type endopeptidase activity;GO:0005518//collagen binding;GO:0008233//peptidase activity;GO:0008234//cysteine-type peptidase activity;GO:0016787//hydrolase activity;GO:0030984//kininogen binding;GO:0042277//peptide binding;GO:0043394//proteoglycan binding;GO:0043621//protein self-association;GO:0044877//protein-containing complex binding	GO:0006508//proteolysis;GO:0006590//thyroid hormone generation;GO:0030574//collagen catabolic process;GO:0030855//epithelial cell differentiation;GO:0046697//decidualization;GO:0046718//viral entry into host cell;GO:0050790//regulation of catalytic activity;GO:0051603//proteolysis involved in cellular protein catabolic process;GO:0060548//negative regulation of cell death;GO:0097067//cellular res…
ENSMUST00000001963	5008410.5	4874104.5	5135728.5	2296984.5	3372566	3199837.75	5006081.16666667	2956462.75	-0.759809582558414	4.14799441966289e-09	5.87182372848559e-07	Ace	angiotensin I converting enzyme (peptidyl-dipeptidase A) 1 [Source:MGI Symbol;Acc:MGI:87874]	Human Diseases;Human Diseases;Organismal Systems;Organismal Systems	Infectious diseases;Cardiovascular diseases;Endocrine system;Endocrine system	ko05142//Chagas disease (American trypanosomiasis);ko05410//Hypertrophic cardiomyopathy (HCM);ko04924//Renin secretion;ko04614//Renin-angiotensin system	K01283;K01283;K01283;K01283	GO:0005576//extracellular region;GO:0005615//extracellular space;GO:0005737//cytoplasm;GO:0005764//lysosome;GO:0005768//endosome;GO:0005886//plasma membrane;GO:0009897//external side of plasma membrane;GO:0009925//basal plasma membrane;GO:0016020//membrane;GO:0016021//integral component of membrane;GO:0031526//brush border membrane;GO:0031982//vesicle;GO:0070062//extracellular exosome;GO:0097225/…	GO:0003779//actin binding;GO:0004175//endopeptidase activity;GO:0004180//carboxypeptidase activity;GO:0005515//protein binding;GO:0008144//drug binding;GO:0008233//peptidase activity;GO:0008237//metallopeptidase activity;GO:0008238//exopeptidase activity;GO:0008239//dipeptidyl-peptidase activity;GO:0008240//tripeptidyl-peptidase activity;GO:0008241//peptidyl-dipeptidase activity;GO:0008270//zinc …	GO:0001822//kidney development;GO:0002446//neutrophil mediated immunity;GO:0003081//regulation of systemic arterial blood pressure by renin-angiotensin;GO:0003084//positive regulation of systemic arterial blood pressure;GO:0006508//proteolysis;GO:0006518//peptide metabolic process;GO:0007283//spermatogenesis;GO:0008217//regulation of blood pressure;GO:0009792//embryo development ending in birth o…
ENSMUST00000000287	102995.0859375	116457.140625	118005.046875	307239.6875	244999.28125	257523.34375	112485.7578125	269920.770833333	1.26279365006256	6.81074465787867e-09	9.21266727389055e-07	Scpep1	serine carboxypeptidase 1 [Source:MGI Symbol;Acc:MGI:1921867]	-	-	-	-	GO:0005576//extracellular region;GO:0005829//cytosol	GO:0004180//carboxypeptidase activity;GO:0004185//serine-type carboxypeptidase activity;GO:0008233//peptidase activity;GO:0016787//hydrolase activity	GO:0006508//proteolysis;GO:0042573//retinoic acid metabolic process;GO:0045776//negative regulation of blood pressure;GO:0051603//proteolysis involved in cellular protein catabolic process;GO:0097755//positive regulation of blood vessel diameter
ENSMUST00000001156	113665.9140625	93747.3671875	137777.671875	215242.34375	159295.25	199336.015625	115063.651041667	191291.203125	0.733338376568001	1.09296452813615e-08	1.41550533675846e-06	Cfp	complement factor properdin [Source:MGI Symbol;Acc:MGI:97545]	Human Diseases	Infectious diseases	ko05168//Herpes simplex infection	K15412	GO:0005576//extracellular region;GO:0005615//extracellular space;GO:0030141//secretory granule	-	GO:0002376//immune system process;GO:0006957//complement activation, alternative pathway;GO:0045087//innate immune response
ENSMUST00000079132	92111.734375	137618.375	256105.375	1605376	984048.8125	1784931.875	161945.161458333	1458118.89583333	3.17053109307988	1.48687749245722e-08	1.84706597889532e-06	Chia1	chitinase, acidic 1 [Source:MGI Symbol;Acc:MGI:1932052]	Metabolism;Metabolism	Global and overview maps;Carbohydrate metabolism	ko01100//Metabolic pathways;ko00520//Amino sugar and nucleotide sugar metabolism	K01183;K01183	GO:0005576//extracellular region;GO:0005615//extracellular space;GO:0005737//cytoplasm	GO:0004553//hydrolase activity, hydrolyzing O-glycosyl compounds;GO:0004568//chitinase activity;GO:0008061//chitin binding;GO:0016787//hydrolase activity;GO:0016798//hydrolase activity, acting on glycosyl bonds;GO:0019900//kinase binding	GO:0000272//polysaccharide catabolic process;GO:0001878//response to yeast;GO:0002376//immune system process;GO:0002532//production of molecular mediator involved in inflammatory response;GO:0005975//carbohydrate metabolic process;GO:0006030//chitin metabolic process;GO:0006032//chitin catabolic process;GO:0006915//apoptotic process;GO:0006954//inflammatory response;GO:0006955//immune response;GO…
ENSMUST00000082060	162679.21875	412424.6875	210723.71875	806177.5625	649505.9375	1057645.875	261942.541666667	837776.458333333	1.67731496029103	1.6283939008938e-08	1.98240673494811e-06	Chil1	chitinase-like 1 [Source:MGI Symbol;Acc:MGI:1340899]	-	-	-	-	GO:0005576//extracellular region;GO:0005615//extracellular space;GO:0005737//cytoplasm;GO:0005783//endoplasmic reticulum	GO:0004568//chitinase activity;GO:0005515//protein binding;GO:0008061//chitin binding	GO:0005975//carbohydrate metabolic process;GO:0006032//chitin catabolic process;GO:0006915//apoptotic process;GO:0006954//inflammatory response;GO:0007250//activation of NF-kappaB-inducing kinase activity;GO:0009612//response to mechanical stimulus;GO:0010800//positive regulation of peptidyl-threonine phosphorylation;GO:0030324//lung development;GO:0034612//response to tumor necrosis factor;GO:00…
ENSMUST00000153856	162679.21875	412424.6875	210723.71875	806177.5625	649505.9375	1057645.875	261942.541666667	837776.458333333	1.67731496029103	1.6283939008938e-08	1.98240673494811e-06	Chil1	chitinase-like 1 [Source:MGI Symbol;Acc:MGI:1340899]	-	-	-	-	GO:0005576//extracellular region;GO:0005615//extracellular space;GO:0005737//cytoplasm;GO:0005783//endoplasmic reticulum	GO:0004568//chitinase activity;GO:0005515//protein binding;GO:0008061//chitin binding	GO:0005975//carbohydrate metabolic process;GO:0006032//chitin catabolic process;GO:0006915//apoptotic process;GO:0006954//inflammatory response;GO:0007250//activation of NF-kappaB-inducing kinase activity;GO:0009612//response to mechanical stimulus;GO:0010800//positive regulation of peptidyl-threonine phosphorylation;GO:0030324//lung development;GO:0034612//response to tumor necrosis factor;GO:00…
ENSMUST00000156873	162679.21875	412424.6875	210723.71875	806177.5625	649505.9375	1057645.875	261942.541666667	837776.458333333	1.67731496029103	1.6283939008938e-08	1.98240673494811e-06	Chil1	chitinase-like 1 [Source:MGI Symbol;Acc:MGI:1340899]	-	-	-	-	GO:0005576//extracellular region;GO:0005615//extracellular space;GO:0005737//cytoplasm;GO:0005783//endoplasmic reticulum	GO:0004568//chitinase activity;GO:0005515//protein binding;GO:0008061//chitin binding	GO:0005975//carbohydrate metabolic process;GO:0006032//chitin catabolic process;GO:0006915//apoptotic process;GO:0006954//inflammatory response;GO:0007250//activation of NF-kappaB-inducing kinase activity;GO:0009612//response to mechanical stimulus;GO:0010800//positive regulation of peptidyl-threonine phosphorylation;GO:0030324//lung development;GO:0034612//response to tumor necrosis factor;GO:00…
ENSMUST00000078155	233307.703125	330828.59375	275457.4375	155088.1875	213897.9375	160307	279864.578125	176431.041666667	-0.665624485392151	1.71009778020785e-08	2.00180099771638e-06	Impdh1	inosine monophosphate dehydrogenase 1 [Source:MGI Symbol;Acc:MGI:96567]	Metabolism;Metabolism;Metabolism	Global and overview maps;Nucleotide metabolism;Xenobiotics biodegradation and metabolism	ko01100//Metabolic pathways;ko00230//Purine metabolism;ko00983//Drug metabolism - other enzymes	K00088;K00088;K00088	GO:0005634//nucleus;GO:0005737//cytoplasm;GO:0005829//cytosol	GO:0000166//nucleotide binding;GO:0003676//nucleic acid binding;GO:0003677//DNA binding;GO:0003824//catalytic activity;GO:0003938//IMP dehydrogenase activity;GO:0016491//oxidoreductase activity;GO:0046872//metal ion binding	GO:0006164//purine nucleotide biosynthetic process;GO:0006177//GMP biosynthetic process;GO:0006183//GTP biosynthetic process;GO:0046651//lymphocyte proliferation;GO:0055114//oxidation-reduction process
ENSMUST00000159124	233307.703125	330828.59375	275457.4375	155088.1875	213897.9375	160307	279864.578125	176431.041666667	-0.665624485392151	1.71009778020785e-08	2.00180099771638e-06	Impdh1	inosine monophosphate dehydrogenase 1 [Source:MGI Symbol;Acc:MGI:96567]	Metabolism;Metabolism;Metabolism	Global and overview maps;Nucleotide metabolism;Xenobiotics biodegradation and metabolism	ko01100//Metabolic pathways;ko00230//Purine metabolism;ko00983//Drug metabolism - other enzymes	K00088;K00088;K00088	GO:0005634//nucleus;GO:0005737//cytoplasm;GO:0005829//cytosol	GO:0000166//nucleotide binding;GO:0003676//nucleic acid binding;GO:0003677//DNA binding;GO:0003824//catalytic activity;GO:0003938//IMP dehydrogenase activity;GO:0016491//oxidoreductase activity;GO:0046872//metal ion binding	GO:0006164//purine nucleotide biosynthetic process;GO:0006177//GMP biosynthetic process;GO:0006183//GTP biosynthetic process;GO:0046651//lymphocyte proliferation;GO:0055114//oxidation-reduction process
ENSMUST00000162099	233307.703125	330828.59375	275457.4375	155088.1875	213897.9375	160307	279864.578125	176431.041666667	-0.665624485392151	1.71009778020785e-08	2.00180099771638e-06	Impdh1	inosine monophosphate dehydrogenase 1 [Source:MGI Symbol;Acc:MGI:96567]	Metabolism;Metabolism;Metabolism	Global and overview maps;Nucleotide metabolism;Xenobiotics biodegradation and metabolism	ko01100//Metabolic pathways;ko00230//Purine metabolism;ko00983//Drug metabolism - other enzymes	K00088;K00088;K00088	GO:0005634//nucleus;GO:0005737//cytoplasm;GO:0005829//cytosol	GO:0000166//nucleotide binding;GO:0003676//nucleic acid binding;GO:0003677//DNA binding;GO:0003824//catalytic activity;GO:0003938//IMP dehydrogenase activity;GO:0016491//oxidoreductase activity;GO:0046872//metal ion binding	GO:0006164//purine nucleotide biosynthetic process;GO:0006177//GMP biosynthetic process;GO:0006183//GTP biosynthetic process;GO:0046651//lymphocyte proliferation;GO:0055114//oxidation-reduction process
ENSMUST00000162739	233307.703125	330828.59375	275457.4375	155088.1875	213897.9375	160307	279864.578125	176431.041666667	-0.665624485392151	1.71009778020785e-08	2.00180099771638e-06	Impdh1	inosine monophosphate dehydrogenase 1 [Source:MGI Symbol;Acc:MGI:96567]	Metabolism;Metabolism;Metabolism	Global and overview maps;Nucleotide metabolism;Xenobiotics biodegradation and metabolism	ko01100//Metabolic pathways;ko00230//Purine metabolism;ko00983//Drug metabolism - other enzymes	K00088;K00088;K00088	GO:0005634//nucleus;GO:0005737//cytoplasm	GO:0000166//nucleotide binding;GO:0003824//catalytic activity;GO:0003938//IMP dehydrogenase activity;GO:0016491//oxidoreductase activity;GO:0046872//metal ion binding	GO:0006164//purine nucleotide biosynthetic process;GO:0006177//GMP biosynthetic process;GO:0055114//oxidation-reduction process
ENSMUST00000007130	1193093.375	1471610.25	1278749	699637.1875	843727.5	930211.0625	1314484.20833333	824525.25	-0.672861230034087	2.47779341932556e-08	2.84572236668579e-06	Ctnnb1	catenin (cadherin associated protein), beta 1 [Source:MGI Symbol;Acc:MGI:88276]	Human Diseases;Human Diseases;Human Diseases;Human Diseases;Human Diseases;Environmental Information Processing;Cellular Processes;Human Diseases;Human Diseases;Human Diseases;Human Diseases;Human Diseases;Organismal Systems;Organismal Systems;Environmental Information Processing;Human Diseases;Cellular Processes;Human Diseases;Human Diseases;Environmental Information Processing;Human Diseases;Hu…	Cancers;Infectious diseases;Neurodegenerative diseases;Infectious diseases;Infectious diseases;Signal transduction;Cellular community - eukaryotes;Infectious diseases;Cancers;Infectious diseases;Cancers;Cardiovascular diseases;Immune system;Endocrine system;Signal transduction;Infectious diseases;Cellular community - eukaryotes;Endocrine and metabolic diseases;Cancers;Signal transduction;Cancers;…	ko05200//Pathways in cancer;ko05165//Human papillomavirus infection;ko05010//Alzheimer disease;ko05132//Salmonella infection;ko05163//Human cytomegalovirus infection;ko04015//Rap1 signaling pathway;ko04510//Focal adhesion;ko05167//Kaposi sarcoma-associated herpesvirus infection;ko05205//Proteoglycans in cancer;ko05160//Hepatitis C;ko05225//Hepatocellular carcinoma;ko05418//Fluid shear stress and …	K02105;K02105;K02105;K02105;K02105;K02105;K02105;K02105;K02105;K02105;K02105;K02105;K02105;K02105;K02105;K02105;K02105;K02105;K02105;K02105;K02105;K02105;K02105;K02105;K02105;K02105;K02105;K02105;K02105	GO:0000922//spindle pole;GO:0005623//cell;GO:0005634//nucleus;GO:0005667//transcription factor complex;GO:0005719//nuclear euchromatin;GO:0005737//cytoplasm;GO:0005813//centrosome;GO:0005815//microtubule organizing center;GO:0005829//cytosol;GO:0005856//cytoskeleton;GO:0005886//plasma membrane;GO:0005911//cell-cell junction;GO:0005912//adherens junction;GO:0005916//fascia adherens;GO:0005923//bic…	GO:0001085//RNA polymerase II transcription factor binding;GO:0001102//RNA polymerase II activating transcription factor binding;GO:0003682//chromatin binding;GO:0003700//DNA-binding transcription factor activity;GO:0003713//transcription coactivator activity;GO:0005515//protein binding;GO:0008013//beta-catenin binding;GO:0008022//protein C-terminus binding;GO:0008134//transcription factor bindin…	GO:0000122//negative regulation of transcription by RNA polymerase II;GO:0000209//protein polyubiquitination;GO:0000578//embryonic axis specification;GO:0000904//cell morphogenesis involved in differentiation;GO:0001501//skeletal system development;GO:0001569//branching involved in blood vessel morphogenesis;GO:0001570//vasculogenesis;GO:0001658//branching involved in ureteric bud morphogenesis;G…
ENSMUST00000178812	1193093.375	1471610.25	1278749	699637.1875	843727.5	930211.0625	1314484.20833333	824525.25	-0.672861230034087	2.47779341932556e-08	2.84572236668579e-06	Ctnnb1	catenin (cadherin associated protein), beta 1 [Source:MGI Symbol;Acc:MGI:88276]	Human Diseases;Human Diseases;Human Diseases;Human Diseases;Human Diseases;Environmental Information Processing;Cellular Processes;Human Diseases;Human Diseases;Human Diseases;Human Diseases;Human Diseases;Organismal Systems;Organismal Systems;Environmental Information Processing;Human Diseases;Cellular Processes;Human Diseases;Human Diseases;Environmental Information Processing;Human Diseases;Hu…	Cancers;Infectious diseases;Neurodegenerative diseases;Infectious diseases;Infectious diseases;Signal transduction;Cellular community - eukaryotes;Infectious diseases;Cancers;Infectious diseases;Cancers;Cardiovascular diseases;Immune system;Endocrine system;Signal transduction;Infectious diseases;Cellular community - eukaryotes;Endocrine and metabolic diseases;Cancers;Signal transduction;Cancers;…	ko05200//Pathways in cancer;ko05165//Human papillomavirus infection;ko05010//Alzheimer disease;ko05132//Salmonella infection;ko05163//Human cytomegalovirus infection;ko04015//Rap1 signaling pathway;ko04510//Focal adhesion;ko05167//Kaposi sarcoma-associated herpesvirus infection;ko05205//Proteoglycans in cancer;ko05160//Hepatitis C;ko05225//Hepatocellular carcinoma;ko05418//Fluid shear stress and …	K02105;K02105;K02105;K02105;K02105;K02105;K02105;K02105;K02105;K02105;K02105;K02105;K02105;K02105;K02105;K02105;K02105;K02105;K02105;K02105;K02105;K02105;K02105;K02105;K02105;K02105;K02105;K02105;K02105	GO:0000922//spindle pole;GO:0005623//cell;GO:0005634//nucleus;GO:0005667//transcription factor complex;GO:0005719//nuclear euchromatin;GO:0005737//cytoplasm;GO:0005813//centrosome;GO:0005815//microtubule organizing center;GO:0005829//cytosol;GO:0005856//cytoskeleton;GO:0005886//plasma membrane;GO:0005911//cell-cell junction;GO:0005912//adherens junction;GO:0005916//fascia adherens;GO:0005923//bic…	GO:0001085//RNA polymerase II transcription factor binding;GO:0001102//RNA polymerase II activating transcription factor binding;GO:0003682//chromatin binding;GO:0003700//DNA-binding transcription factor activity;GO:0003713//transcription coactivator activity;GO:0005515//protein binding;GO:0008013//beta-catenin binding;GO:0008022//protein C-terminus binding;GO:0008134//transcription factor bindin…	GO:0000122//negative regulation of transcription by RNA polymerase II;GO:0000209//protein polyubiquitination;GO:0000578//embryonic axis specification;GO:0000904//cell morphogenesis involved in differentiation;GO:0001501//skeletal system development;GO:0001569//branching involved in blood vessel morphogenesis;GO:0001570//vasculogenesis;GO:0001658//branching involved in ureteric bud morphogenesis;G…
ENSMUST00000003459	74883.484375	97253.9375	93279.28125	217867.59375	172551.890625	230524.390625	88472.234375	206981.291666667	1.22620370923201	4.05023635403344e-08	4.40246226553599e-06	Myo1g	myosin IG [Source:MGI Symbol;Acc:MGI:1927091]	Human Diseases	Infectious diseases	ko05130//Pathogenic Escherichia coli infection	K10356	GO:0001891//phagocytic cup;GO:0005623//cell;GO:0005737//cytoplasm;GO:0005886//plasma membrane;GO:0005902//microvillus;GO:0015629//actin cytoskeleton;GO:0016020//membrane;GO:0016459//myosin complex;GO:0030027//lamellipodium;GO:0030175//filopodium;GO:0031256//leading edge membrane;GO:0031982//vesicle;GO:0042995//cell projection	GO:0000146//microfilament motor activity;GO:0000166//nucleotide binding;GO:0003774//motor activity;GO:0003779//actin binding;GO:0005516//calmodulin binding;GO:0005524//ATP binding;GO:0005546//phosphatidylinositol-4,5-bisphosphate binding;GO:0005547//phosphatidylinositol-3,4,5-trisphosphate binding;GO:0008289//lipid binding;GO:0030898//actin-dependent ATPase activity;GO:0043325//phosphatidylinosit…	GO:0002250//adaptive immune response;GO:0002376//immune system process;GO:0002456//T cell mediated immunity;GO:0006887//exocytosis;GO:0006909//phagocytosis;GO:0007015//actin filament organization;GO:0030050//vesicle transport along actin filament;GO:0031589//cell-substrate adhesion;GO:0038096//Fc-gamma receptor signaling pathway involved in phagocytosis;GO:0071976//cell gliding;GO:0120117//T cell…
ENSMUST00000051809	558520.25	695860.9375	477839.125	348685.8125	313175.03125	289435.03125	577406.770833333	317098.625	-0.86465640346376	4.31535317875166e-08	4.60834294720374e-06	Myct1	myc target 1 [Source:MGI Symbol;Acc:MGI:1915882]	-	-	-	-	GO:0005634//nucleus;GO:0005654//nucleoplasm;GO:0016020//membrane;GO:0016021//integral component of membrane;GO:0031965//nuclear membrane;GO:0043231//intracellular membrane-bounded organelle	GO:0003674//molecular_function	GO:0008150//biological_process
ENSMUST00000004232	5006032	5647752.5	4063281	2782235.5	2700561.25	3490241	4905688.5	2991012.58333333	-0.713821649011077	5.94264288174491e-08	6.13099444426801e-06	Adh1	alcohol dehydrogenase 1 (class I) [Source:MGI Symbol;Acc:MGI:87921]	Metabolism;Metabolism;Metabolism;Human Diseases;Metabolism;Metabolism;Metabolism;Metabolism	Global and overview maps;Carbohydrate metabolism;Lipid metabolism;Cancers;Xenobiotics biodegradation and metabolism;Xenobiotics biodegradation and metabolism;Metabolism of cofactors and vitamins;Amino acid metabolism	ko01100//Metabolic pathways;ko00010//Glycolysis / Gluconeogenesis;ko00071//Fatty acid degradation;ko05204//Chemical carcinogenesis;ko00980//Metabolism of xenobiotics by cytochrome P450;ko00982//Drug metabolism - cytochrome P450;ko00830//Retinol metabolism;ko00350//Tyrosine metabolism	K13951;K13951;K13951;K13951;K13951;K13951;K13951;K13951	GO:0005654//nucleoplasm;GO:0005737//cytoplasm;GO:0005739//mitochondrion;GO:0005829//cytosol;GO:0005886//plasma membrane	GO:0004022//alcohol dehydrogenase (NAD) activity;GO:0004024//alcohol dehydrogenase activity, zinc-dependent;GO:0004745//retinol dehydrogenase activity;GO:0008144//drug binding;GO:0008270//zinc ion binding;GO:0016491//oxidoreductase activity;GO:0035276//ethanol binding;GO:0042802//identical protein binding;GO:0046872//metal ion binding;GO:0051287//NAD binding	GO:0001523//retinoid metabolic process;GO:0006068//ethanol catabolic process;GO:0006069//ethanol oxidation;GO:0032526//response to retinoic acid;GO:0033574//response to testosterone;GO:0042572//retinol metabolic process;GO:0042573//retinoic acid metabolic process;GO:0046186//acetaldehyde biosynthetic process;GO:0048149//behavioral response to ethanol;GO:0048545//response to steroid hormone;GO:005…
ENSMUST00000023531	173420.15625	200074.96875	224468.3125	382255.21875	323642.5625	301137.78125	199321.145833333	335678.520833333	0.751985453060333	8.80482583117405e-08	8.93249580572608e-06	Hcls1	hematopoietic cell specific Lyn substrate 1 [Source:MGI Symbol;Acc:MGI:104568]	Human Diseases;Cellular Processes;Human Diseases	Cancers;Cellular community - eukaryotes;Infectious diseases	ko05205//Proteoglycans in cancer;ko04530//Tight junction;ko05100//Bacterial invasion of epithelial cells	K06106;K06106;K06106	GO:0005634//nucleus;GO:0005667//transcription factor complex;GO:0005737//cytoplasm;GO:0005739//mitochondrion;GO:0005829//cytosol;GO:0005884//actin filament;GO:0005886//plasma membrane;GO:0014069//postsynaptic density;GO:0030027//lamellipodium;GO:0030425//dendrite;GO:0030427//site of polarized growth;GO:0030864//cortical actin cytoskeleton;GO:0045211//postsynaptic membrane	GO:0001085//RNA polymerase II transcription factor binding;GO:0003779//actin binding;GO:0005515//protein binding;GO:0017124//SH3 domain binding;GO:0019901//protein kinase binding;GO:0044877//protein-containing complex binding;GO:0051015//actin filament binding	GO:0000122//negative regulation of transcription by RNA polymerase II;GO:0008284//positive regulation of cell proliferation;GO:0009725//response to hormone;GO:0014068//positive regulation of phosphatidylinositol 3-kinase signaling;GO:0030041//actin filament polymerization;GO:0030218//erythrocyte differentiation;GO:0030833//regulation of actin filament polymerization;GO:0030854//positive regulatio…
ENSMUST00000033053	70980.96875	56876.83984375	84996.7890625	181037.671875	97263.140625	151662.390625	70951.5325520833	143321.067708333	1.01434494451377	1.86560576696887e-07	1.77436598492805e-05	Itgax	integrin alpha X [Source:MGI Symbol;Acc:MGI:96609]	Human Diseases;Cellular Processes;Organismal Systems	Infectious diseases;Cell motility;Immune system	ko05152//Tuberculosis;ko04810//Regulation of actin cytoskeleton;ko04610//Complement and coagulation cascades	K06462;K06462;K06462	GO:0008305//integrin complex;GO:0009897//external side of plasma membrane;GO:0009986//cell surface;GO:0016020//membrane;GO:0016021//integral component of membrane	GO:0030971//receptor tyrosine kinase binding;GO:0046872//metal ion binding	GO:0007155//cell adhesion;GO:0007229//integrin-mediated signaling pathway;GO:0008284//positive regulation of cell proliferation;GO:0010628//positive regulation of gene expression;GO:0030335//positive regulation of cell migration;GO:0031643//positive regulation of myelination;GO:0034113//heterotypic cell-cell adhesion;GO:0045766//positive regulation of angiogenesis;GO:0051607//defense response to …
ENSMUST00000085673	170172	190898.71875	95703.2265625	419588.65625	366748.53125	281726.71875	152257.981770833	356021.302083333	1.22544570555472	2.1128982525155e-07	1.94866843379725e-05	Pml	promyelocytic leukemia [Source:MGI Symbol;Acc:MGI:104662]	Human Diseases;Cellular Processes;Human Diseases;Human Diseases;Human Diseases;Genetic Information Processing;Human Diseases	Cancers;Transport and catabolism;Infectious diseases;Cancers;Infectious diseases;Folding, sorting and degradation;Cancers	ko05200//Pathways in cancer;ko04144//Endocytosis;ko05168//Herpes simplex infection;ko05202//Transcriptional misregulation in cancers;ko05164//Influenza A;ko04120//Ubiquitin mediated proteolysis;ko05221//Acute myeloid leukemia	K10054;K10054;K10054;K10054;K10054;K10054;K10054	GO:0000784//nuclear chromosome, telomeric region;GO:0000792//heterochromatin;GO:0005634//nucleus;GO:0005654//nucleoplasm;GO:0005730//nucleolus;GO:0005737//cytoplasm;GO:0005768//endosome;GO:0005783//endoplasmic reticulum;GO:0005789//endoplasmic reticulum membrane;GO:0005829//cytosol;GO:0016020//membrane;GO:0016363//nuclear matrix;GO:0016605//PML body;GO:0031901//early endosome membrane;GO:0031965/…	GO:0003677//DNA binding;GO:0003713//transcription coactivator activity;GO:0005515//protein binding;GO:0008270//zinc ion binding;GO:0031625//ubiquitin protein ligase binding;GO:0032183//SUMO binding;GO:0042803//protein homodimerization activity;GO:0046332//SMAD binding;GO:0046872//metal ion binding;GO:0046982//protein heterodimerization activity;GO:0050897//cobalt ion binding;GO:0140037//sumo-depe…	GO:0001666//response to hypoxia;GO:0001932//regulation of protein phosphorylation;GO:0002230//positive regulation of defense response to virus by host;GO:0002376//immune system process;GO:0006355//regulation of transcription, DNA-templated;GO:0006605//protein targeting;GO:0006606//protein import into nucleus;GO:0006915//apoptotic process;GO:0006919//activation of cysteine-type endopeptidase activ…
ENSMUST00000178282	543520.3125	98173.4453125	976133.625	6516625.5	3017785.5	4407276.5	539275.794270833	4647229.16666667	3.10727560540651	2.18465711199189e-07	1.98477728965592e-05	Igha	immunoglobulin heavy constant alpha [Source:MGI Symbol;Acc:MGI:96444]	Environmental Information Processing;Human Diseases;Human Diseases;Environmental Information Processing;Cellular Processes;Organismal Systems;Environmental Information Processing;Human Diseases;Human Diseases;Environmental Information Processing;Human Diseases;Human Diseases;Organismal Systems;Organismal Systems;Human Diseases;Organismal Systems;Human Diseases;Organismal Systems;Human Diseases;Hu…	Signal transduction;Infectious diseases;Infectious diseases;Signal transduction;Transport and catabolism;Immune system;Signal transduction;Cancers;Immune diseases;Signal transduction;Cardiovascular diseases;Infectious diseases;Immune system;Immune system;Cardiovascular diseases;Immune system;Infectious diseases;Immune system;Immune diseases;Infectious diseases;Infectious diseases;Infectious disea…	ko04151//PI3K-Akt signaling pathway;ko05169//Epstein-Barr virus infection;ko05152//Tuberculosis;ko04072//Phospholipase D signaling pathway;ko04145//Phagosome;ko04666//Fc gamma R-mediated phagocytosis;ko04020//Calcium signaling pathway;ko05202//Transcriptional misregulation in cancers;ko05322//Systemic lupus erythematosus;ko04064//NF-kappa B signaling pathway;ko05414//Dilated cardiomyopathy (DCM);…	K06856;K06856;K06856;K06856;K06856;K06856;K06856;K06856;K06856;K06856;K06856;K06856;K06856;K06856;K06856;K06856;K06856;K06856;K06856;K06856;K06856;K06856;K06856;K06856;K06856;K06856;K06856	GO:0009897//external side of plasma membrane;GO:0042571//immunoglobulin complex, circulating	GO:0003823//antigen binding;GO:0034987//immunoglobulin receptor binding	GO:0002385//mucosal immune response;GO:0002455//humoral immune response mediated by circulating immunoglobulin;GO:0006910//phagocytosis, recognition;GO:0006911//phagocytosis, engulfment;GO:0006958//complement activation, classical pathway;GO:0016064//immunoglobulin mediated immune response;GO:0042742//defense response to bacterium;GO:0045087//innate immune response;GO:0050853//B cell receptor sig…
ENSMUST00000194738	543520.3125	98173.4453125	976133.625	6516625.5	3017785.5	4407276.5	539275.794270833	4647229.16666667	3.10727560540651	2.18465711199189e-07	1.98477728965592e-05	Igha	immunoglobulin heavy constant alpha [Source:MGI Symbol;Acc:MGI:96444]	Environmental Information Processing;Human Diseases;Human Diseases;Environmental Information Processing;Cellular Processes;Organismal Systems;Environmental Information Processing;Human Diseases;Human Diseases;Environmental Information Processing;Human Diseases;Human Diseases;Organismal Systems;Organismal Systems;Human Diseases;Organismal Systems;Human Diseases;Organismal Systems;Human Diseases;Hu…	Signal transduction;Infectious diseases;Infectious diseases;Signal transduction;Transport and catabolism;Immune system;Signal transduction;Cancers;Immune diseases;Signal transduction;Cardiovascular diseases;Infectious diseases;Immune system;Immune system;Cardiovascular diseases;Immune system;Infectious diseases;Immune system;Immune diseases;Infectious diseases;Infectious diseases;Infectious disea…	ko04151//PI3K-Akt signaling pathway;ko05169//Epstein-Barr virus infection;ko05152//Tuberculosis;ko04072//Phospholipase D signaling pathway;ko04145//Phagosome;ko04666//Fc gamma R-mediated phagocytosis;ko04020//Calcium signaling pathway;ko05202//Transcriptional misregulation in cancers;ko05322//Systemic lupus erythematosus;ko04064//NF-kappa B signaling pathway;ko05414//Dilated cardiomyopathy (DCM);…	K06856;K06856;K06856;K06856;K06856;K06856;K06856;K06856;K06856;K06856;K06856;K06856;K06856;K06856;K06856;K06856;K06856;K06856;K06856;K06856;K06856;K06856;K06856;K06856;K06856;K06856;K06856	GO:0009897//external side of plasma membrane;GO:0042571//immunoglobulin complex, circulating	GO:0003823//antigen binding;GO:0034987//immunoglobulin receptor binding	GO:0002385//mucosal immune response;GO:0002455//humoral immune response mediated by circulating immunoglobulin;GO:0006910//phagocytosis, recognition;GO:0006911//phagocytosis, engulfment;GO:0006958//complement activation, classical pathway;GO:0016064//immunoglobulin mediated immune response;GO:0042742//defense response to bacterium;GO:0045087//innate immune response;GO:0050853//B cell receptor sig…
ENSMUST00000023797	704725.4375	733.648132324219	330299.125	865348.9375	2864.16967773438	2222289.25	345252.736877441	1030167.45239258	1.57715410855943	2.608674399918e-07	2.33514721651483e-05	Krt4	keratin 4 [Source:MGI Symbol;Acc:MGI:96701]	-	-	-	-	GO:0005882//intermediate filament;GO:0009986//cell surface;GO:0045095//keratin filament;GO:0045111//intermediate filament cytoskeleton	-	GO:0007010//cytoskeleton organization;GO:0030855//epithelial cell differentiation;GO:0050680//negative regulation of epithelial cell proliferation
ENSMUST00000025211	83948.2109375	67031.3203125	334698.75	2236789.5	1618676	1987017	161892.760416667	1947494.16666667	3.58850862978751	3.19593478778558e-07	2.73995141595082e-05	Mzb1	marginal zone B and B1 cell-specific protein 1 [Source:MGI Symbol;Acc:MGI:1917066]	-	-	-	-	GO:0005576//extracellular region;GO:0005737//cytoplasm;GO:0005783//endoplasmic reticulum;GO:0005788//endoplasmic reticulum lumen;GO:0034663//endoplasmic reticulum chaperone complex	GO:0003674//molecular_function;GO:0005515//protein binding	GO:0002642//positive regulation of immunoglobulin biosynthetic process;GO:0008284//positive regulation of cell proliferation;GO:0030888//regulation of B cell proliferation;GO:0033622//integrin activation;GO:0042127//regulation of cell proliferation;GO:0046626//regulation of insulin receptor signaling pathway
ENSMUST00000049768	6491.30419921875	6703.28564453125	55935.30859375	567625.75	134229.890625	252609.40625	23043.2994791667	318155.015625	3.78731065495721	3.51402440890056e-07	2.93309326990357e-05	Epx	eosinophil peroxidase [Source:MGI Symbol;Acc:MGI:107569]	Human Diseases	Immune diseases	ko05310//Asthma	K10788	GO:0005615//extracellular space;GO:0005737//cytoplasm	GO:0004601//peroxidase activity;GO:0016491//oxidoreductase activity;GO:0020037//heme binding;GO:0046872//metal ion binding	GO:0002215//defense response to nematode;GO:0006952//defense response;GO:0006979//response to oxidative stress;GO:0032693//negative regulation of interleukin-10 production;GO:0032714//negative regulation of interleukin-5 production;GO:0032753//positive regulation of interleukin-4 production;GO:0042742//defense response to bacterium;GO:0042744//hydrogen peroxide catabolic process;GO:0055114//oxida…
ENSMUST00000069960	5575035	5648047.5	3858473.75	1789549.375	3021721.25	2405976	5027185.41666667	2405748.875	-1.06326484653535	3.7950335495177e-07	3.08004922878856e-05	S100a9	S100 calcium binding protein A9 (calgranulin B) [Source:MGI Symbol;Acc:MGI:1338947]	Organismal Systems	Immune system	ko04657//IL-17 signaling pathway	K21128	GO:0005576//extracellular region;GO:0005615//extracellular space;GO:0005654//nucleoplasm;GO:0005737//cytoplasm;GO:0005829//cytosol;GO:0005856//cytoskeleton;GO:0005886//plasma membrane;GO:0016020//membrane;GO:0030054//cell junction	GO:0005509//calcium ion binding;GO:0008017//microtubule binding;GO:0008270//zinc ion binding;GO:0016209//antioxidant activity;GO:0035662//Toll-like receptor 4 binding;GO:0046872//metal ion binding;GO:0050544//arachidonic acid binding;GO:0050786//RAGE receptor binding	GO:0002376//immune system process;GO:0002523//leukocyte migration involved in inflammatory response;GO:0002793//positive regulation of peptide secretion;GO:0006417//regulation of translation;GO:0006914//autophagy;GO:0006915//apoptotic process;GO:0006919//activation of cysteine-type endopeptidase activity involved in apoptotic process;GO:0006935//chemotaxis;GO:0006954//inflammatory response;GO:001…
ENSMUST00000117167	5575035	5648047.5	3858473.75	1789549.375	3021721.25	2405976	5027185.41666667	2405748.875	-1.06326484653535	3.7950335495177e-07	3.08004922878856e-05	S100a9	S100 calcium binding protein A9 (calgranulin B) [Source:MGI Symbol;Acc:MGI:1338947]	Organismal Systems	Immune system	ko04657//IL-17 signaling pathway	K21128	GO:0005576//extracellular region;GO:0005615//extracellular space;GO:0005654//nucleoplasm;GO:0005737//cytoplasm;GO:0005829//cytosol;GO:0005856//cytoskeleton;GO:0005886//plasma membrane;GO:0016020//membrane;GO:0030054//cell junction	GO:0005509//calcium ion binding;GO:0008017//microtubule binding;GO:0008270//zinc ion binding;GO:0016209//antioxidant activity;GO:0035662//Toll-like receptor 4 binding;GO:0046872//metal ion binding;GO:0050544//arachidonic acid binding;GO:0050786//RAGE receptor binding	GO:0002376//immune system process;GO:0002523//leukocyte migration involved in inflammatory response;GO:0002793//positive regulation of peptide secretion;GO:0006417//regulation of translation;GO:0006914//autophagy;GO:0006915//apoptotic process;GO:0006919//activation of cysteine-type endopeptidase activity involved in apoptotic process;GO:0006935//chemotaxis;GO:0006954//inflammatory response;GO:001…
ENSMUST00000034285	949323.75	1097188	797746.0625	1303348.375	1290389.875	1677321.125	948085.9375	1423686.45833333	0.586541712724077	4.40763197741784e-07	3.5301652429661e-05	Cotl1	coactosin-like 1 (Dictyostelium) [Source:MGI Symbol;Acc:MGI:1919292]	-	-	-	-	GO:0005575//cellular_component;GO:0005634//nucleus;GO:0005737//cytoplasm;GO:0005829//cytosol;GO:0005856//cytoskeleton;GO:0005884//actin filament;GO:0005886//plasma membrane;GO:0030427//site of polarized growth;GO:0030864//cortical actin cytoskeleton	GO:0003779//actin binding;GO:0005515//protein binding;GO:0019899//enzyme binding;GO:0051015//actin filament binding	GO:0030833//regulation of actin filament polymerization;GO:0050832//defense response to fungus
ENSMUST00000168698	949323.75	1097188	797746.0625	1303348.375	1290389.875	1677321.125	948085.9375	1423686.45833333	0.586541712724077	4.40763197741784e-07	3.5301652429661e-05	Cotl1	coactosin-like 1 (Dictyostelium) [Source:MGI Symbol;Acc:MGI:1919292]	-	-	-	-	GO:0005575//cellular_component;GO:0005634//nucleus;GO:0005737//cytoplasm;GO:0005829//cytosol;GO:0005856//cytoskeleton;GO:0005884//actin filament;GO:0005886//plasma membrane;GO:0030427//site of polarized growth;GO:0030864//cortical actin cytoskeleton	GO:0003779//actin binding;GO:0005515//protein binding;GO:0019899//enzyme binding;GO:0051015//actin filament binding	GO:0030833//regulation of actin filament polymerization;GO:0050832//defense response to fungus
ENSMUST00000040518	295250.125	206519.953125	215289.484375	891326.6875	264311	688525.1875	239019.854166667	614720.958333333	1.36280121269908	4.83908103102056e-07	3.82538782283405e-05	Eif3l	eukaryotic translation initiation factor 3, subunit L [Source:MGI Symbol;Acc:MGI:2386251]	-	-	-	-	GO:0001650//fibrillar center;GO:0005654//nucleoplasm;GO:0005730//nucleolus;GO:0005737//cytoplasm;GO:0005852//eukaryotic translation initiation factor 3 complex;GO:0016282//eukaryotic 43S preinitiation complex;GO:0033290//eukaryotic 48S preinitiation complex	GO:0003743//translation initiation factor activity;GO:0005515//protein binding	GO:0001732//formation of cytoplasmic translation initiation complex;GO:0002183//cytoplasmic translational initiation;GO:0006412//translation;GO:0006413//translational initiation;GO:0075525//viral translational termination-reinitiation
ENSMUST00000138659	339905.3125	440120.8125	310651.15625	155177.875	155649.90625	256365.78125	363559.09375	189064.520833333	-0.943311224515145	5.76363920043986e-07	4.38540897663468e-05	Gnao1	guanine nucleotide binding protein, alpha O [Source:MGI Symbol;Acc:MGI:95775]	Human Diseases;Human Diseases;Environmental Information Processing;Human Diseases;Organismal Systems;Organismal Systems;Organismal Systems;Human Diseases;Organismal Systems;Organismal Systems;Organismal Systems;Human Diseases;Organismal Systems;Organismal Systems;Organismal Systems;Human Diseases;Organismal Systems;Organismal Systems;Organismal Systems	Infectious disease: viral;Infectious diseases;Signal transduction;Substance dependence;Endocrine system;Nervous system;Nervous system;Infectious diseases;Endocrine system;Endocrine system;Nervous system;Infectious diseases;Environmental adaptation;Nervous system;Nervous system;Substance dependence;Endocrine system;Nervous system;Nervous system	ko05170//Human immunodeficiency virus 1 infection;ko05163//Human cytomegalovirus infection;ko04015//Rap1 signaling pathway;ko05034//Alcoholism;ko04926//Relaxin signaling pathway;ko04728//Dopaminergic synapse;ko04723//Retrograde endocannabinoid signaling;ko05145//Toxoplasmosis;ko04921//Oxytocin signaling pathway;ko04915//Estrogen signaling pathway;ko04725//Cholinergic synapse;ko05142//Chagas disea…	K04534;K04534;K04534;K04534;K04534;K04534;K04534;K04534;K04534;K04534;K04534;K04534;K04534;K04534;K04534;K04534;K04534;K04534;K04534	GO:0005834//heterotrimeric G-protein complex;GO:0005886//plasma membrane;GO:0016020//membrane;GO:0030425//dendrite;GO:0032991//protein-containing complex;GO:0043005//neuron projection;GO:0043209//myelin sheath;GO:0044297//cell body	GO:0000166//nucleotide binding;GO:0001664//G protein-coupled receptor binding;GO:0003924//GTPase activity;GO:0005102//signaling receptor binding;GO:0005515//protein binding;GO:0005525//GTP binding;GO:0019001//guanyl nucleotide binding;GO:0031683//G-protein beta/gamma-subunit complex binding;GO:0031821//G protein-coupled serotonin receptor binding;GO:0031852//mu-type opioid receptor binding;GO:003…	GO:0007165//signal transduction;GO:0007186//G protein-coupled receptor signaling pathway;GO:0007188//adenylate cyclase-modulating G protein-coupled receptor signaling pathway;GO:0007212//dopamine receptor signaling pathway;GO:0007568//aging;GO:0007626//locomotory behavior;GO:0008016//regulation of heart contraction;GO:0009987//cellular process;GO:0010243//response to organonitrogen compound;GO:00…
ENSMUST00000076648	15987.2939453125	8073.9287109375	25035.83203125	114769.9765625	52382.3203125	208330.890625	16365.6848958333	125161.0625	2.93503992603696	6.68489545678319e-07	5.02357514141226e-05	Fcgbp	Fc fragment of IgG binding protein [Source:MGI Symbol;Acc:MGI:2444336]	-	-	-	-	GO:0031012//extracellular matrix	GO:0005515//protein binding	GO:0008150//biological_process
ENSMUST00000067190	186516.1875	115750.78125	139084.796875	131901.4375	55376.53125	103687.796875	147117.255208333	96988.5885416667	-0.601079550350194	8.02270053633493e-07	5.95538758105741e-05	Lifr	LIF receptor alpha [Source:MGI Symbol;Acc:MGI:96788]	Environmental Information Processing;Cellular Processes;Environmental Information Processing	Signal transduction;Cellular community - eukaryotes;Signaling molecules and interaction	ko04630//Jak-STAT signaling pathway;ko04550//Signaling pathways regulating pluripotency of stem cells;ko04060//Cytokine-cytokine receptor interaction	K05058;K05058;K05058	GO:0005576//extracellular region;GO:0005886//plasma membrane;GO:0009897//external side of plasma membrane;GO:0016020//membrane;GO:0016021//integral component of membrane;GO:0043235//receptor complex	GO:0004896//cytokine receptor activity;GO:0004897//ciliary neurotrophic factor receptor activity;GO:0004923//leukemia inhibitory factor receptor activity;GO:0004924//oncostatin-M receptor activity;GO:0005127//ciliary neurotrophic factor receptor binding;GO:0005515//protein binding;GO:0019838//growth factor binding;GO:0019955//cytokine binding	GO:0008284//positive regulation of cell proliferation;GO:0010656//negative regulation of muscle cell apoptotic process;GO:0019221//cytokine-mediated signaling pathway;GO:0031100//animal organ regeneration;GO:0034097//response to cytokine;GO:0038165//oncostatin-M-mediated signaling pathway;GO:0048812//neuron projection morphogenesis;GO:0048861//leukemia inhibitory factor signaling pathway;GO:00701…
ENSMUST00000171588	186516.1875	115750.78125	139084.796875	131901.4375	55376.53125	103687.796875	147117.255208333	96988.5885416667	-0.601079550350194	8.02270053633493e-07	5.95538758105741e-05	Lifr	LIF receptor alpha [Source:MGI Symbol;Acc:MGI:96788]	Environmental Information Processing;Cellular Processes;Environmental Information Processing	Signal transduction;Cellular community - eukaryotes;Signaling molecules and interaction	ko04630//Jak-STAT signaling pathway;ko04550//Signaling pathways regulating pluripotency of stem cells;ko04060//Cytokine-cytokine receptor interaction	K05058;K05058;K05058	GO:0005576//extracellular region;GO:0005886//plasma membrane;GO:0009897//external side of plasma membrane;GO:0016020//membrane;GO:0016021//integral component of membrane;GO:0043235//receptor complex	GO:0004896//cytokine receptor activity;GO:0004897//ciliary neurotrophic factor receptor activity;GO:0004923//leukemia inhibitory factor receptor activity;GO:0004924//oncostatin-M receptor activity;GO:0005127//ciliary neurotrophic factor receptor binding;GO:0005515//protein binding;GO:0019838//growth factor binding;GO:0019955//cytokine binding	GO:0008284//positive regulation of cell proliferation;GO:0010656//negative regulation of muscle cell apoptotic process;GO:0019221//cytokine-mediated signaling pathway;GO:0031100//animal organ regeneration;GO:0034097//response to cytokine;GO:0038165//oncostatin-M-mediated signaling pathway;GO:0048812//neuron projection morphogenesis;GO:0048861//leukemia inhibitory factor signaling pathway;GO:00701…
ENSMUST00000226471	186516.1875	115750.78125	139084.796875	131901.4375	55376.53125	103687.796875	147117.255208333	96988.5885416667	-0.601079550350194	8.02270053633493e-07	5.95538758105741e-05	Lifr	LIF receptor alpha [Source:MGI Symbol;Acc:MGI:96788]	Environmental Information Processing;Cellular Processes;Environmental Information Processing	Signal transduction;Cellular community - eukaryotes;Signaling molecules and interaction	ko04630//Jak-STAT signaling pathway;ko04550//Signaling pathways regulating pluripotency of stem cells;ko04060//Cytokine-cytokine receptor interaction	K05058;K05058;K05058	GO:0005576//extracellular region;GO:0005886//plasma membrane;GO:0009897//external side of plasma membrane;GO:0016020//membrane;GO:0016021//integral component of membrane;GO:0043235//receptor complex	GO:0004896//cytokine receptor activity;GO:0004897//ciliary neurotrophic factor receptor activity;GO:0004923//leukemia inhibitory factor receptor activity;GO:0004924//oncostatin-M receptor activity;GO:0005127//ciliary neurotrophic factor receptor binding;GO:0005515//protein binding;GO:0019838//growth factor binding;GO:0019955//cytokine binding	GO:0008284//positive regulation of cell proliferation;GO:0010656//negative regulation of muscle cell apoptotic process;GO:0019221//cytokine-mediated signaling pathway;GO:0031100//animal organ regeneration;GO:0034097//response to cytokine;GO:0038165//oncostatin-M-mediated signaling pathway;GO:0048812//neuron projection morphogenesis;GO:0048861//leukemia inhibitory factor signaling pathway;GO:00701…
ENSMUST00000045730	1658881.375	1997765.125	1920506	772917.25	1217268.375	1324252	1859050.83333333	1104812.54166667	-0.750764617361257	9.79836780633208e-07	7.18586323339077e-05	Akap12	A kinase (PRKA) anchor protein (gravin) 12 [Source:MGI Symbol;Acc:MGI:1932576]	-	-	-	-	GO:0005737//cytoplasm;GO:0005829//cytosol;GO:0005856//cytoskeleton;GO:0005886//plasma membrane;GO:0016020//membrane;GO:0043025//neuronal cell body;GO:0098685//Schaffer collateral - CA1 synapse	GO:0005516//calmodulin binding;GO:0008179//adenylate cyclase binding;GO:0016301//kinase activity;GO:0030159//receptor signaling complex scaffold activity;GO:0051018//protein kinase A binding	GO:0006605//protein targeting;GO:0007165//signal transduction;GO:0007193//adenylate cyclase-inhibiting G protein-coupled receptor signaling pathway;GO:0010738//regulation of protein kinase A signaling;GO:0010739//positive regulation of protein kinase A signaling;GO:0016310//phosphorylation;GO:0032496//response to lipopolysaccharide;GO:0035733//hepatic stellate cell activation;GO:0042535//positive…
ENSMUST00000102825	258069.84375	134363.890625	155635.75	312971.4375	468280.53125	349659.84375	182689.828125	376970.604166667	1.04505571853209	1.00440305039926e-06	7.27833496164322e-05	Ifit3	interferon-induced protein with tetratricopeptide repeats 3 [Source:MGI Symbol;Acc:MGI:1101055]	-	-	-	-	GO:0005737//cytoplasm;GO:0005739//mitochondrion;GO:0005829//cytosol	GO:0003723//RNA binding;GO:0005515//protein binding;GO:0042802//identical protein binding	GO:0002376//immune system process;GO:0008285//negative regulation of cell proliferation;GO:0009615//response to virus;GO:0009617//response to bacterium;GO:0035457//cellular response to interferon-alpha;GO:0035458//cellular response to interferon-beta;GO:0035634//response to stilbenoid;GO:0043066//negative regulation of apoptotic process;GO:0045087//innate immune response;GO:0051607//defense respo…
ENSMUST00000031319	1542369.625	2544969.75	1778873.875	828152.625	1077096.25	1162556.875	1955404.41666667	1022601.91666667	-0.9352223813365	1.12594874510803e-06	7.86017513922074e-05	Ppbp	pro-platelet basic protein [Source:MGI Symbol;Acc:MGI:1888712]	Organismal Systems;Environmental Information Processing;Environmental Information Processing	Immune system;Signaling molecules and interaction;Signaling molecules and interaction	ko04062//Chemokine signaling pathway;ko04060//Cytokine-cytokine receptor interaction;ko04061//Viral protein interaction with cytokine and cytokine receptor	K10029;K10029;K10029	GO:0005576//extracellular region;GO:0005615//extracellular space	GO:0008009//chemokine activity;GO:0045236//CXCR chemokine receptor binding	GO:0002523//leukocyte migration involved in inflammatory response;GO:0006935//chemotaxis;GO:0006952//defense response;GO:0006954//inflammatory response;GO:0006955//immune response;GO:0030593//neutrophil chemotaxis;GO:0030595//leukocyte chemotaxis;GO:0061844//antimicrobial humoral immune response mediated by antimicrobial peptide;GO:0070098//chemokine-mediated signaling pathway;GO:0071222//cellula…
ENSMUST00000082219	450778.59375	384819.375	1413411.875	9245608	7075267	7343997.5	749669.947916667	7888290.83333333	3.39538526843058	1.12734699209338e-06	7.86017513922074e-05	Chil4	chitinase-like 4 [Source:MGI Symbol;Acc:MGI:1341098]	-	-	-	-	GO:0005576//extracellular region;GO:0005737//cytoplasm	GO:0004568//chitinase activity;GO:0008061//chitin binding	GO:0005975//carbohydrate metabolic process;GO:0006032//chitin catabolic process;GO:0006954//inflammatory response
ENSMUST00000028794	79717.0703125	21609.279296875	29993.10546875	157382.796875	115948.9453125	112828.9609375	43773.1516927083	128720.234375	1.55612069032681	1.13634863192283e-06	7.86017513922074e-05	Siglec1	sialic acid binding Ig-like lectin 1, sialoadhesin [Source:MGI Symbol;Acc:MGI:99668]	Environmental Information Processing	Signaling molecules and interaction	ko04514//Cell adhesion molecules (CAMs)	K06548	-	-	-
ENSMUST00000000299	178492.15625	202677.515625	222392.578125	600985.6875	350956.53125	370489.15625	201187.416666667	440810.458333333	1.13161837847129	1.21614223801096e-06	8.3175930368233e-05	Itgb2	integrin beta 2 [Source:MGI Symbol;Acc:MGI:96611]	Human Diseases;Cellular Processes;Environmental Information Processing;Cellular Processes;Human Diseases;Human Diseases;Organismal Systems;Organismal Systems;Human Diseases;Human Diseases;Environmental Information Processing;Environmental Information Processing;Human Diseases;Human Diseases;Organismal Systems;Human Diseases;Human Diseases;Human Diseases	Infectious diseases;Cell motility;Signal transduction;Transport and catabolism;Infectious diseases;Infectious diseases;Immune system;Immune system;Cardiovascular diseases;Infectious diseases;Signaling molecules and interaction;Signal transduction;Immune diseases;Infectious diseases;Immune system;Infectious diseases;Infectious diseases;Infectious diseases	ko05152//Tuberculosis;ko04810//Regulation of actin cytoskeleton;ko04015//Rap1 signaling pathway;ko04145//Phagosome;ko05166//HTLV-I infection;ko05146//Amoebiasis;ko04650//Natural killer cell mediated cytotoxicity;ko04670//Leukocyte transendothelial migration;ko05416//Viral myocarditis;ko05140//Leishmaniasis;ko04514//Cell adhesion molecules (CAMs);ko04390//Hippo signaling pathway;ko05323//Rheumatoi…	K06464;K06464;K06464;K06464;K06464;K06464;K06464;K06464;K06464;K06464;K06464;K06464;K06464;K06464;K06464;K06464;K06464;K06464	GO:0005886//plasma membrane;GO:0008305//integrin complex;GO:0009986//cell surface;GO:0016020//membrane;GO:0016021//integral component of membrane	GO:0038023//signaling receptor activity;GO:0044877//protein-containing complex binding;GO:0050839//cell adhesion molecule binding	GO:0002523//leukocyte migration involved in inflammatory response;GO:0007155//cell adhesion;GO:0007159//leukocyte cell-cell adhesion;GO:0007160//cell-matrix adhesion;GO:0007229//integrin-mediated signaling pathway;GO:0007568//aging;GO:0030101//natural killer cell activation;GO:0043542//endothelial cell migration;GO:0045123//cellular extravasation;GO:0045429//positive regulation of nitric oxide bi…
ENSMUST00000114878	83086.2578125	32875.19140625	72239.9921875	214558.453125	132020.484375	194182.25	62733.8138020833	180253.729166667	1.52271393010052	1.71597663523426e-06	0.000114781865699681	Parp9	poly (ADP-ribose) polymerase family, member 9 [Source:MGI Symbol;Acc:MGI:1933117]	-	-	-	-	GO:0005634//nucleus;GO:0005654//nucleoplasm;GO:0005737//cytoplasm;GO:0005739//mitochondrion;GO:0005829//cytosol;GO:0032991//protein-containing complex;GO:0090734//site of DNA damage	GO:0003714//transcription corepressor activity;GO:0003950//NAD+ ADP-ribosyltransferase activity;GO:0004857//enzyme inhibitor activity;GO:0016740//transferase activity;GO:0019899//enzyme binding;GO:0042393//histone binding;GO:0044389//ubiquitin-like protein ligase binding;GO:0072570//ADP-D-ribose binding;GO:0097677//STAT family protein binding	GO:0000122//negative regulation of transcription by RNA polymerase II;GO:0002230//positive regulation of defense response to virus by host;GO:0002376//immune system process;GO:0006281//DNA repair;GO:0006302//double-strand break repair;GO:0006471//protein ADP-ribosylation;GO:0006974//cellular response to DNA damage stimulus;GO:0010608//posttranscriptional regulation of gene expression;GO:0010629//…
ENSMUST00000029018	19433.951171875	5960.583984375	13884.1279296875	237706.921875	214299.578125	264751.75	13092.8876953125	238919.416666667	4.18966887411141	1.84017255891057e-06	0.000121751417022703	Zbp1	Z-DNA binding protein 1 [Source:MGI Symbol;Acc:MGI:1927449]	Cellular Processes;Organismal Systems	Cell growth and death;Immune system	ko04217//Necroptosis;ko04623//Cytosolic DNA-sensing pathway	K12965;K12965	-	GO:0003677//DNA binding;GO:0005515//protein binding	GO:0060340//positive regulation of type I interferon-mediated signaling pathway
ENSMUST00000035988	426909.9375	468277.71875	426234.5625	952922.6875	778952.375	753226.625	440474.072916667	828367.229166667	0.911213378519764	2.01518292816109e-06	0.000130493813656559	Txndc5	thioredoxin domain containing 5 [Source:MGI Symbol;Acc:MGI:2145316]	Genetic Information Processing	Folding, sorting and degradation	ko04141//Protein processing in endoplasmic reticulum	K13984	GO:0005623//cell;GO:0005783//endoplasmic reticulum;GO:0005788//endoplasmic reticulum lumen	GO:0016853//isomerase activity	GO:0043277//apoptotic cell clearance;GO:0045454//cell redox homeostasis
ENSMUST00000160653	426909.9375	468277.71875	426234.5625	952922.6875	778952.375	753226.625	440474.072916667	828367.229166667	0.911213378519764	2.01518292816109e-06	0.000130493813656559	Txndc5	thioredoxin domain containing 5 [Source:MGI Symbol;Acc:MGI:2145316]	Genetic Information Processing	Folding, sorting and degradation	ko04141//Protein processing in endoplasmic reticulum	K13984	GO:0005623//cell	GO:0016853//isomerase activity	GO:0045454//cell redox homeostasis
ENSMUST00000045902	5901438	5462114	5411128	2633366.75	3989353.25	4353058	5591560	3658592.66666667	-0.611962038849685	2.57498618472386e-06	0.000163270217775147	Fmo2	flavin containing monooxygenase 2 [Source:MGI Symbol;Acc:MGI:1916776]	Metabolism	Xenobiotics biodegradation and metabolism	ko00982//Drug metabolism - cytochrome P450	K00485	GO:0005783//endoplasmic reticulum;GO:0005789//endoplasmic reticulum membrane;GO:0016020//membrane;GO:0016021//integral component of membrane;GO:0031090//organelle membrane;GO:0043231//intracellular membrane-bounded organelle	GO:0004497//monooxygenase activity;GO:0004499//N,N-dimethylaniline monooxygenase activity;GO:0016491//oxidoreductase activity;GO:0050660//flavin adenine dinucleotide binding;GO:0050661//NADP binding	GO:0006082//organic acid metabolic process;GO:0006739//NADP metabolic process;GO:0006805//xenobiotic metabolic process;GO:0009404//toxin metabolic process;GO:0017144//drug metabolic process;GO:0055114//oxidation-reduction process;GO:0070995//NADPH oxidation;GO:0072592//oxygen metabolic process
ENSMUST00000111510	5901438	5462114	5411128	2633366.75	3989353.25	4353058	5591560	3658592.66666667	-0.611962038849685	2.57498618472386e-06	0.000163270217775147	Fmo2	flavin containing monooxygenase 2 [Source:MGI Symbol;Acc:MGI:1916776]	Metabolism	Xenobiotics biodegradation and metabolism	ko00982//Drug metabolism - cytochrome P450	K00485	GO:0005783//endoplasmic reticulum;GO:0005789//endoplasmic reticulum membrane;GO:0016020//membrane;GO:0016021//integral component of membrane;GO:0031090//organelle membrane;GO:0043231//intracellular membrane-bounded organelle	GO:0004497//monooxygenase activity;GO:0004499//N,N-dimethylaniline monooxygenase activity;GO:0016491//oxidoreductase activity;GO:0050660//flavin adenine dinucleotide binding;GO:0050661//NADP binding	GO:0006082//organic acid metabolic process;GO:0006739//NADP metabolic process;GO:0006805//xenobiotic metabolic process;GO:0009404//toxin metabolic process;GO:0017144//drug metabolic process;GO:0055114//oxidation-reduction process;GO:0070995//NADPH oxidation;GO:0072592//oxygen metabolic process
ENSMUST00000027675	28770.314453125	22811.69140625	18346.826171875	466259.3125	315592.4375	525013.9375	23309.6106770833	435621.895833333	4.22407965709194	2.87810915526206e-06	0.000176960105334143	Pigr	polymeric immunoglobulin receptor [Source:MGI Symbol;Acc:MGI:103080]	Organismal Systems	Immune system	ko04672//Intestinal immune network for IgA production	K13073	GO:0005576//extracellular region;GO:0005615//extracellular space;GO:0005886//plasma membrane;GO:0016020//membrane;GO:0016021//integral component of membrane;GO:0030133//transport vesicle;GO:0043235//receptor complex;GO:0055038//recycling endosome membrane	GO:0001792//polymeric immunoglobulin receptor activity;GO:0005154//epidermal growth factor receptor binding	GO:0001580//detection of chemical stimulus involved in sensory perception of bitter taste;GO:0002415//immunoglobulin transcytosis in epithelial cells mediated by polymeric immunoglobulin receptor;GO:0007173//epidermal growth factor receptor signaling pathway;GO:0038093//Fc receptor signaling pathway;GO:0043113//receptor clustering
ENSMUST00000026328	306558.875	266103.84375	228530.265625	750567.875	676448.75	843114.5	267064.328125	756710.375	1.50255393800537	4.34924131483854e-06	0.000255299157437883	Prdx4	peroxiredoxin 4 [Source:MGI Symbol;Acc:MGI:1859815]	Cellular Processes	Cell growth and death	ko04214//Apoptosis - fly	K03386	GO:0005615//extracellular space;GO:0005623//cell;GO:0005737//cytoplasm;GO:0005739//mitochondrion;GO:0005783//endoplasmic reticulum;GO:0005790//smooth endoplasmic reticulum;GO:0005829//cytosol	GO:0004601//peroxidase activity;GO:0005515//protein binding;GO:0008379//thioredoxin peroxidase activity;GO:0016209//antioxidant activity;GO:0016491//oxidoreductase activity;GO:0051920//peroxiredoxin activity	GO:0006979//response to oxidative stress;GO:0007283//spermatogenesis;GO:0008584//male gonad development;GO:0018401//peptidyl-proline hydroxylation to 4-hydroxy-L-proline;GO:0022417//protein maturation by protein folding;GO:0030198//extracellular matrix organization;GO:0045454//cell redox homeostasis;GO:0055114//oxidation-reduction process;GO:0072593//reactive oxygen species metabolic process;GO:0…
ENSMUST00000028624	70800.03125	59033.51953125	119146.046875	323210.5625	237629.703125	265867.25	82993.19921875	275569.171875	1.73134947527153	4.43733823606036e-06	0.000257238836599042	Gatm	glycine amidinotransferase (L-arginine:glycine amidinotransferase) [Source:MGI Symbol;Acc:MGI:1914342]	Metabolism;Metabolism;Metabolism	Global and overview maps;Amino acid metabolism;Amino acid metabolism	ko01100//Metabolic pathways;ko00330//Arginine and proline metabolism;ko00260//Glycine, serine and threonine metabolism	K00613;K00613;K00613	GO:0005739//mitochondrion;GO:0005743//mitochondrial inner membrane;GO:0005758//mitochondrial intermembrane space;GO:0016020//membrane	GO:0015067//amidinotransferase activity;GO:0015068//glycine amidinotransferase activity;GO:0016740//transferase activity	GO:0006600//creatine metabolic process;GO:0006601//creatine biosynthetic process;GO:0007275//multicellular organism development;GO:0007584//response to nutrient;GO:0007611//learning or memory;GO:0010033//response to organic substance;GO:0014889//muscle atrophy;GO:0043434//response to peptide hormone;GO:0046689//response to mercury ion;GO:0120162//positive regulation of cold-induced thermogenesis
ENSMUST00000022314	3283153.5	3867610.75	3179647	6575624	5942828	8385938.5	3443470.41666667	6968130.16666667	1.01690829145575	4.54900012066159e-06	0.000261224186174218	Sftpa1	surfactant associated protein A1 [Source:MGI Symbol;Acc:MGI:109518]	Cellular Processes;Human Diseases	Transport and catabolism;Infectious diseases	ko04145//Phagosome;ko05133//Pertussis	K10067;K10067	-	-	-
ENSMUST00000170719	3283153.5	3867610.75	3179647	6575624	5942828	8385938.5	3443470.41666667	6968130.16666667	1.01690829145575	4.54900012066159e-06	0.000261224186174218	Sftpa1	surfactant associated protein A1 [Source:MGI Symbol;Acc:MGI:109518]	Cellular Processes;Human Diseases	Transport and catabolism;Infectious diseases	ko04145//Phagosome;ko05133//Pertussis	K10067;K10067	GO:0005615//extracellular space;GO:0005771//multivesicular body;GO:0005791//rough endoplasmic reticulum;GO:0031410//cytoplasmic vesicle	-	GO:0001666//response to hypoxia;GO:0007623//circadian rhythm;GO:0009725//response to hormone;GO:0032496//response to lipopolysaccharide;GO:0032526//response to retinoic acid;GO:0033189//response to vitamin A;GO:0050766//positive regulation of phagocytosis;GO:0051384//response to glucocorticoid;GO:0055093//response to hyperoxia;GO:0070741//response to interleukin-6;GO:0070849//response to epiderma…
ENSMUST00000034586	962303.625	673423.125	821601.6875	274076.40625	375170.6875	376954	819109.479166667	342067.03125	-1.2597772276094	5.47625906751164e-06	0.000306345657227468	Apoc3	apolipoprotein C-III [Source:MGI Symbol;Acc:MGI:88055]	Organismal Systems;Organismal Systems	Endocrine system;Digestive system	ko03320//PPAR signaling pathway;ko04979//Cholesterol metabolism	K08759;K08759	GO:0005576//extracellular region	GO:0008289//lipid binding	GO:0006869//lipid transport;GO:0042157//lipoprotein metabolic process
ENSMUST00000118649	962303.625	673423.125	821601.6875	274076.40625	375170.6875	376954	819109.479166667	342067.03125	-1.2597772276094	5.47625906751164e-06	0.000306345657227468	Apoc3	apolipoprotein C-III [Source:MGI Symbol;Acc:MGI:88055]	Organismal Systems;Organismal Systems	Endocrine system;Digestive system	ko03320//PPAR signaling pathway;ko04979//Cholesterol metabolism	K08759;K08759	GO:0005576//extracellular region	GO:0008289//lipid binding	GO:0006869//lipid transport;GO:0042157//lipoprotein metabolic process
ENSMUST00000121916	962303.625	673423.125	821601.6875	274076.40625	375170.6875	376954	819109.479166667	342067.03125	-1.2597772276094	5.47625906751164e-06	0.000306345657227468	Apoc3	apolipoprotein C-III [Source:MGI Symbol;Acc:MGI:88055]	Organismal Systems;Organismal Systems	Endocrine system;Digestive system	ko03320//PPAR signaling pathway;ko04979//Cholesterol metabolism	K08759;K08759	GO:0005576//extracellular region	GO:0008289//lipid binding	GO:0006869//lipid transport;GO:0042157//lipoprotein metabolic process
ENSMUST00000075418	72535.625	87788.46875	53077.640625	140135.828125	131351.265625	124717.984375	71133.9114583333	132068.359375	0.892675469846864	6.81743974144899e-06	0.000373853655010811	Stard5	StAR-related lipid transfer (START) domain containing 5 [Source:MGI Symbol;Acc:MGI:2156765]	-	-	-	-	-	GO:0008289//lipid binding;GO:0015485//cholesterol binding;GO:0032052//bile acid binding;GO:0120020//intermembrane cholesterol transfer activity	GO:0006869//lipid transport;GO:0070508//cholesterol import
ENSMUST00000020969	501114.75	528038.0625	603650.9375	765535	877355	1007487.3125	544267.916666667	883459.104166667	0.698846358096358	7.49512971928761e-06	0.000403439177372543	Cmpk2	cytidine monophosphate (UMP-CMP) kinase 2, mitochondrial [Source:MGI Symbol;Acc:MGI:99830]	Metabolism;Metabolism	Global and overview maps;Nucleotide metabolism	ko01100//Metabolic pathways;ko00240//Pyrimidine metabolism	K13809;K13809	GO:0005737//cytoplasm;GO:0005739//mitochondrion	GO:0000166//nucleotide binding;GO:0004127//cytidylate kinase activity;GO:0004550//nucleoside diphosphate kinase activity;GO:0004798//thymidylate kinase activity;GO:0005524//ATP binding;GO:0009041//uridylate kinase activity;GO:0016301//kinase activity;GO:0016740//transferase activity;GO:0033862//UMP kinase activity;GO:0050145//nucleoside monophosphate kinase activity	GO:0006165//nucleoside diphosphate phosphorylation;GO:0006221//pyrimidine nucleotide biosynthetic process;GO:0006227//dUDP biosynthetic process;GO:0006233//dTDP biosynthetic process;GO:0006235//dTTP biosynthetic process;GO:0009142//nucleoside triphosphate biosynthetic process;GO:0016310//phosphorylation;GO:0046940//nucleoside monophosphate phosphorylation;GO:0071222//cellular response to lipopoly…
ENSMUST00000045866	100391.3046875	88678.53125	74678.2421875	145456.84375	110962.578125	146986.265625	87916.0260416667	134468.5625	0.613070842981483	7.55012607784005e-06	0.000403439177372543	Ddx21	DEAD (Asp-Glu-Ala-Asp) box polypeptide 21 [Source:MGI Symbol;Acc:MGI:1860494]	-	-	-	-	GO:0005634//nucleus;GO:0005654//nucleoplasm;GO:0005730//nucleolus;GO:0005737//cytoplasm;GO:0005739//mitochondrion;GO:0005829//cytosol	GO:0000166//nucleotide binding;GO:0003676//nucleic acid binding;GO:0003723//RNA binding;GO:0003724//RNA helicase activity;GO:0003725//double-stranded RNA binding;GO:0004386//helicase activity;GO:0005515//protein binding;GO:0005524//ATP binding;GO:0016787//hydrolase activity;GO:0019843//rRNA binding;GO:0030515//snoRNA binding;GO:0035198//miRNA binding;GO:0042802//identical protein binding;GO:00973…	GO:0002376//immune system process;GO:0002735//positive regulation of myeloid dendritic cell cytokine production;GO:0006364//rRNA processing;GO:0006366//transcription by RNA polymerase II;GO:0009615//response to virus;GO:0043123//positive regulation of I-kappaB kinase/NF-kappaB signaling;GO:0043330//response to exogenous dsRNA;GO:0045087//innate immune response;GO:0051607//defense response to virus
ENSMUST00000063888	112689.046875	173872.078125	166773.390625	302659.34375	272460.875	342477.96875	151111.505208333	305866.0625	1.0172865334706	8.08328007864278e-06	0.000427851529032161	Pld4	phospholipase D family, member 4 [Source:MGI Symbol;Acc:MGI:2144765]	Metabolism;Metabolism;Metabolism	Global and overview maps;Lipid metabolism;Lipid metabolism	ko01100//Metabolic pathways;ko00564//Glycerophospholipid metabolism;ko00565//Ether lipid metabolism	K16860;K16860;K16860	GO:0005634//nucleus;GO:0005768//endosome;GO:0005769//early endosome;GO:0005783//endoplasmic reticulum;GO:0005789//endoplasmic reticulum membrane;GO:0005794//Golgi apparatus;GO:0016020//membrane;GO:0016021//integral component of membrane;GO:0031410//cytoplasmic vesicle;GO:0032588//trans-Golgi network membrane;GO:0045335//phagocytic vesicle	GO:0003824//catalytic activity;GO:0004518//nuclease activity;GO:0004527//exonuclease activity;GO:0005515//protein binding;GO:0016787//hydrolase activity;GO:0045145//single-stranded DNA 5'-3' exodeoxyribonuclease activity	GO:0002244//hematopoietic progenitor cell differentiation;GO:0002376//immune system process;GO:0006259//DNA metabolic process;GO:0006909//phagocytosis;GO:0006954//inflammatory response;GO:0045087//innate immune response;GO:0090305//nucleic acid phosphodiester bond hydrolysis;GO:1900015//regulation of cytokine production involved in inflammatory response
ENSMUST00000117095	58929.13671875	77163.140625	81429.7578125	250037.171875	166071.21875	171496.359375	72507.3450520833	195868.25	1.43368450367836	8.48224200569244e-06	0.000445098336971119	Pld3	phospholipase D family, member 3 [Source:MGI Symbol;Acc:MGI:1333782]	Metabolism;Metabolism;Metabolism	Global and overview maps;Lipid metabolism;Lipid metabolism	ko01100//Metabolic pathways;ko00564//Glycerophospholipid metabolism;ko00565//Ether lipid metabolism	K16860;K16860;K16860	GO:0000139//Golgi membrane;GO:0005764//lysosome;GO:0005765//lysosomal membrane;GO:0005768//endosome;GO:0005783//endoplasmic reticulum;GO:0005789//endoplasmic reticulum membrane;GO:0005794//Golgi apparatus;GO:0010008//endosome membrane;GO:0016020//membrane;GO:0016021//integral component of membrane;GO:0031901//early endosome membrane;GO:0031902//late endosome membrane;GO:0043202//lysosomal lumen	GO:0003824//catalytic activity;GO:0004518//nuclease activity;GO:0004527//exonuclease activity;GO:0004630//phospholipase D activity;GO:0016787//hydrolase activity;GO:0045145//single-stranded DNA 5'-3' exodeoxyribonuclease activity	GO:0002376//immune system process;GO:0006259//DNA metabolic process;GO:0006954//inflammatory response;GO:0014902//myotube differentiation;GO:0045087//innate immune response;GO:0090305//nucleic acid phosphodiester bond hydrolysis;GO:1900015//regulation of cytokine production involved in inflammatory response
ENSMUST00000117611	58929.13671875	77163.140625	81429.7578125	250037.171875	166071.21875	171496.359375	72507.3450520833	195868.25	1.43368450367836	8.48224200569244e-06	0.000445098336971119	Pld3	phospholipase D family, member 3 [Source:MGI Symbol;Acc:MGI:1333782]	Metabolism;Metabolism;Metabolism	Global and overview maps;Lipid metabolism;Lipid metabolism	ko01100//Metabolic pathways;ko00564//Glycerophospholipid metabolism;ko00565//Ether lipid metabolism	K16860;K16860;K16860	GO:0000139//Golgi membrane;GO:0005764//lysosome;GO:0005765//lysosomal membrane;GO:0005768//endosome;GO:0005783//endoplasmic reticulum;GO:0005789//endoplasmic reticulum membrane;GO:0005794//Golgi apparatus;GO:0010008//endosome membrane;GO:0016020//membrane;GO:0016021//integral component of membrane;GO:0031901//early endosome membrane;GO:0031902//late endosome membrane;GO:0043202//lysosomal lumen	GO:0003824//catalytic activity;GO:0004518//nuclease activity;GO:0004527//exonuclease activity;GO:0004630//phospholipase D activity;GO:0016787//hydrolase activity;GO:0045145//single-stranded DNA 5'-3' exodeoxyribonuclease activity	GO:0002376//immune system process;GO:0006259//DNA metabolic process;GO:0006954//inflammatory response;GO:0014902//myotube differentiation;GO:0045087//innate immune response;GO:0090305//nucleic acid phosphodiester bond hydrolysis;GO:1900015//regulation of cytokine production involved in inflammatory response
ENSMUST00000017867	160216.171875	307810.375	393683.59375	599195.25	625575.75	693618.5	287236.713541667	639463.166666667	1.15462110076305	9.2679302652376e-06	0.000478083826478824	Wfdc2	WAP four-disulfide core domain 2 [Source:MGI Symbol;Acc:MGI:1914951]	-	-	-	-	GO:0005576//extracellular region	GO:0004867//serine-type endopeptidase inhibitor activity;GO:0004869//cysteine-type endopeptidase inhibitor activity;GO:0019828//aspartic-type endopeptidase inhibitor activity;GO:0030414//peptidase inhibitor activity	GO:0010466//negative regulation of peptidase activity;GO:0010951//negative regulation of endopeptidase activity
ENSMUST00000043315	118353.21875	31062.951171875	158025.84375	637050	735301	808783.0625	102480.671223958	727044.6875	2.82669221139051	1.26218221092664e-05	0.00063495067090169	Serpina3g	serine (or cysteine) peptidase inhibitor, clade A, member 3G [Source:MGI Symbol;Acc:MGI:105046]	-	-	-	-	GO:0005615//extracellular space	-	-
ENSMUST00000065487	5580853	5242727	5342388	2648683.75	4311508	3733981.75	5388656	3564724.5	-0.596134908991506	1.29561385730879e-05	0.000646426356511362	Prx	periaxin [Source:MGI Symbol;Acc:MGI:108176]	-	-	-	-	-	GO:0005515//protein binding	-
ENSMUST00000098644	5580853	5242727	5342388	2648683.75	4311508	3733981.75	5388656	3564724.5	-0.596134908991506	1.29561385730879e-05	0.000646426356511362	Prx	periaxin [Source:MGI Symbol;Acc:MGI:108176]	-	-	-	-	GO:0005634//nucleus;GO:0005737//cytoplasm	GO:0005515//protein binding	-
ENSMUST00000238936	5580853	5242727	5342388	2648683.75	4311508	3733981.75	5388656	3564724.5	-0.596134908991506	1.29561385730879e-05	0.000646426356511362	Prx	periaxin [Source:MGI Symbol;Acc:MGI:108176]	-	-	-	-	-	GO:0005515//protein binding	-
ENSMUST00000238964	5580853	5242727	5342388	2648683.75	4311508	3733981.75	5388656	3564724.5	-0.596134908991506	1.29561385730879e-05	0.000646426356511362	Prx	periaxin [Source:MGI Symbol;Acc:MGI:108176]	-	-	-	-	-	GO:0005515//protein binding	-
ENSMUST00000074557	287933.40625	214672.328125	241430.015625	629640.3125	347669.75	573443.5	248011.916666667	516917.854166667	1.05952559134537	1.51965589678831e-05	0.00075204434502036	H2-Eb1	histocompatibility 2, class II antigen E beta [Source:MGI Symbol;Acc:MGI:95901]	Human Diseases;Human Diseases;Human Diseases;Cellular Processes;Human Diseases;Human Diseases;Human Diseases;Human Diseases;Human Diseases;Organismal Systems;Human Diseases;Environmental Information Processing;Human Diseases;Human Diseases;Organismal Systems;Human Diseases;Human Diseases;Organismal Systems;Human Diseases;Organismal Systems;Organismal Systems;Human Diseases;Human Diseases;Human Di…	Infectious diseases;Infectious diseases;Infectious diseases;Transport and catabolism;Infectious diseases;Immune diseases;Infectious diseases;Cardiovascular diseases;Infectious diseases;Immune system;Infectious diseases;Signaling molecules and interaction;Immune diseases;Infectious diseases;Immune system;Immune diseases;Immune diseases;Immune system;Immune diseases;Immune system;Immune system;Immu…	ko05169//Epstein-Barr virus infection;ko05152//Tuberculosis;ko05168//Herpes simplex infection;ko04145//Phagosome;ko05166//HTLV-I infection;ko05322//Systemic lupus erythematosus;ko05164//Influenza A;ko05416//Viral myocarditis;ko05145//Toxoplasmosis;ko04640//Hematopoietic cell lineage;ko05140//Leishmaniasis;ko04514//Cell adhesion molecules (CAMs);ko05323//Rheumatoid arthritis;ko05150//Staphylococcu…	K06752;K06752;K06752;K06752;K06752;K06752;K06752;K06752;K06752;K06752;K06752;K06752;K06752;K06752;K06752;K06752;K06752;K06752;K06752;K06752;K06752;K06752;K06752;K06752	GO:0016020//membrane;GO:0042613//MHC class II protein complex	-	GO:0006955//immune response;GO:0019882//antigen processing and presentation
ENSMUST00000235530	287933.40625	214672.328125	241430.015625	629640.3125	347669.75	573443.5	248011.916666667	516917.854166667	1.05952559134537	1.51965589678831e-05	0.00075204434502036	H2-Eb1	histocompatibility 2, class II antigen E beta [Source:MGI Symbol;Acc:MGI:95901]	Human Diseases;Human Diseases;Human Diseases;Cellular Processes;Human Diseases;Human Diseases;Human Diseases;Human Diseases;Human Diseases;Organismal Systems;Human Diseases;Environmental Information Processing;Human Diseases;Human Diseases;Organismal Systems;Human Diseases;Human Diseases;Organismal Systems;Human Diseases;Organismal Systems;Organismal Systems;Human Diseases;Human Diseases;Human Di…	Infectious diseases;Infectious diseases;Infectious diseases;Transport and catabolism;Infectious diseases;Immune diseases;Infectious diseases;Cardiovascular diseases;Infectious diseases;Immune system;Infectious diseases;Signaling molecules and interaction;Immune diseases;Infectious diseases;Immune system;Immune diseases;Immune diseases;Immune system;Immune diseases;Immune system;Immune system;Immu…	ko05169//Epstein-Barr virus infection;ko05152//Tuberculosis;ko05168//Herpes simplex infection;ko04145//Phagosome;ko05166//HTLV-I infection;ko05322//Systemic lupus erythematosus;ko05164//Influenza A;ko05416//Viral myocarditis;ko05145//Toxoplasmosis;ko04640//Hematopoietic cell lineage;ko05140//Leishmaniasis;ko04514//Cell adhesion molecules (CAMs);ko05323//Rheumatoid arthritis;ko05150//Staphylococcu…	K06752;K06752;K06752;K06752;K06752;K06752;K06752;K06752;K06752;K06752;K06752;K06752;K06752;K06752;K06752;K06752;K06752;K06752;K06752;K06752;K06752;K06752;K06752;K06752	GO:0016020//membrane;GO:0016021//integral component of membrane;GO:0042613//MHC class II protein complex	-	GO:0006955//immune response;GO:0019882//antigen processing and presentation
ENSMUST00000142734	731956.0625	565927	938669.6875	3446117.5	1973659.875	1735643	745517.583333333	2385140.125	1.67775974128728	1.7240877772108e-05	0.00083289859522874	Lgals3	lectin, galactose binding, soluble 3 [Source:MGI Symbol;Acc:MGI:96778]	-	-	-	-	GO:0001772//immunological synapse;GO:0005634//nucleus;GO:0005737//cytoplasm;GO:0005743//mitochondrial inner membrane	GO:0019863//IgE binding;GO:0019903//protein phosphatase binding;GO:0030246//carbohydrate binding;GO:0042056//chemoattractant activity;GO:0043236//laminin binding	GO:0002548//monocyte chemotaxis;GO:0030593//neutrophil chemotaxis;GO:0030855//epithelial cell differentiation;GO:0031334//positive regulation of protein complex assembly;GO:0042129//regulation of T cell proliferation;GO:0045806//negative regulation of endocytosis;GO:0048245//eosinophil chemotaxis;GO:0048246//macrophage chemotaxis;GO:0050918//positive chemotaxis;GO:0070232//regulation of T cell ap…
ENSMUST00000146468	731956.0625	565927	938669.6875	3446117.5	1973659.875	1735643	745517.583333333	2385140.125	1.67775974128728	1.7240877772108e-05	0.00083289859522874	Lgals3	lectin, galactose binding, soluble 3 [Source:MGI Symbol;Acc:MGI:96778]	-	-	-	-	-	GO:0030246//carbohydrate binding	-
ENSMUST00000150290	731956.0625	565927	938669.6875	3446117.5	1973659.875	1735643	745517.583333333	2385140.125	1.67775974128728	1.7240877772108e-05	0.00083289859522874	Lgals3	lectin, galactose binding, soluble 3 [Source:MGI Symbol;Acc:MGI:96778]	-	-	-	-	-	GO:0030246//carbohydrate binding	-
ENSMUST00000001046	550365	534533.9375	652800.875	678980.625	858871.1875	1180628.125	579233.270833333	906159.979166667	0.645621302796488	2.01134372794036e-05	0.000949073586974649	S100a4	S100 calcium binding protein A4 [Source:MGI Symbol;Acc:MGI:1330282]	-	-	-	-	GO:0005634//nucleus;GO:0043005//neuron projection;GO:0048471//perinuclear region of cytoplasm	GO:0003779//actin binding;GO:0005509//calcium ion binding;GO:0005515//protein binding;GO:0042802//identical protein binding;GO:0046872//metal ion binding;GO:0046914//transition metal ion binding;GO:0048306//calcium-dependent protein binding;GO:0050786//RAGE receptor binding	GO:0043123//positive regulation of I-kappaB kinase/NF-kappaB signaling
ENSMUST00000142476	550365	534533.9375	652800.875	678980.625	858871.1875	1180628.125	579233.270833333	906159.979166667	0.645621302796488	2.01134372794036e-05	0.000949073586974649	S100a4	S100 calcium binding protein A4 [Source:MGI Symbol;Acc:MGI:1330282]	-	-	-	-	-	GO:0005509//calcium ion binding;GO:0046872//metal ion binding;GO:0046914//transition metal ion binding	-
ENSMUST00000061673	1311014.75	1624944.375	1067767.125	839907.1875	934916	870852.125	1334575.41666667	881891.770833333	-0.597707315627351	2.03082631195608e-05	0.000950895366221281	Itga1	integrin alpha 1 [Source:MGI Symbol;Acc:MGI:96599]	Environmental Information Processing;Human Diseases;Cellular Processes;Cellular Processes;Human Diseases;Organismal Systems;Environmental Information Processing;Human Diseases;Human Diseases	Signal transduction;Infectious diseases;Cell motility;Cellular community - eukaryotes;Cardiovascular diseases;Immune system;Signaling molecules and interaction;Cardiovascular diseases;Cardiovascular diseases	ko04151//PI3K-Akt signaling pathway;ko05165//Human papillomavirus infection;ko04810//Regulation of actin cytoskeleton;ko04510//Focal adhesion;ko05414//Dilated cardiomyopathy (DCM);ko04640//Hematopoietic cell lineage;ko04512//ECM-receptor interaction;ko05410//Hypertrophic cardiomyopathy (HCM);ko05412//Arrhythmogenic right ventricular cardiomyopathy (ARVC)	K06480;K06480;K06480;K06480;K06480;K06480;K06480;K06480;K06480	GO:0001669//acrosomal vesicle;GO:0005886//plasma membrane;GO:0005925//focal adhesion;GO:0008305//integrin complex;GO:0009897//external side of plasma membrane;GO:0009986//cell surface;GO:0016020//membrane;GO:0016021//integral component of membrane;GO:0034665//integrin alpha1-beta1 complex;GO:0043005//neuron projection;GO:0043204//perikaryon;GO:0045121//membrane raft;GO:0045178//basal part of cell	GO:0005102//signaling receptor binding;GO:0005515//protein binding;GO:0005518//collagen binding;GO:0019903//protein phosphatase binding;GO:0046872//metal ion binding;GO:0098639//collagen binding involved in cell-matrix adhesion	GO:0000187//activation of MAPK activity;GO:0007155//cell adhesion;GO:0007160//cell-matrix adhesion;GO:0007229//integrin-mediated signaling pathway;GO:0008285//negative regulation of cell proliferation;GO:0030593//neutrophil chemotaxis;GO:0032516//positive regulation of phosphoprotein phosphatase activity;GO:0042059//negative regulation of epidermal growth factor receptor signaling pathway;GO:0042…
ENSMUST00000003100	3962012	5675599.5	3657716	1955318.375	2427475.5	2495073.5	4431775.83333333	2292622.45833333	-0.950886113178283	2.14660349283862e-05	0.000997433241290739	Cyp2f2	cytochrome P450, family 2, subfamily f, polypeptide 2 [Source:MGI Symbol;Acc:MGI:88608]	Metabolism	Xenobiotics biodegradation and metabolism	ko00980//Metabolism of xenobiotics by cytochrome P450	K07416	GO:0005737//cytoplasm;GO:0005783//endoplasmic reticulum;GO:0005789//endoplasmic reticulum membrane;GO:0016020//membrane;GO:0031090//organelle membrane;GO:0043231//intracellular membrane-bounded organelle	GO:0004497//monooxygenase activity;GO:0005506//iron ion binding;GO:0008392//arachidonic acid epoxygenase activity;GO:0008395//steroid hydroxylase activity;GO:0016491//oxidoreductase activity;GO:0016705//oxidoreductase activity, acting on paired donors, with incorporation or reduction of molecular oxygen;GO:0016712//oxidoreductase activity, acting on paired donors, with incorporation or reduction …	GO:0006082//organic acid metabolic process;GO:0006805//xenobiotic metabolic process;GO:0009636//response to toxic substance;GO:0018931//naphthalene metabolic process;GO:0018979//trichloroethylene metabolic process;GO:0019373//epoxygenase P450 pathway;GO:0042738//exogenous drug catabolic process;GO:0055114//oxidation-reduction process
ENSMUST00000025161	457013	271388.03125	362502.78125	878326.3125	794795.875	1032191.8125	363634.604166667	901771.333333333	1.31027215276626	2.21034514089309e-05	0.00101927052065274	Tapbp	TAP binding protein [Source:MGI Symbol;Acc:MGI:1201689]	Human Diseases;Human Diseases;Human Diseases;Human Diseases;Organismal Systems	Infectious diseases;Infectious disease: viral;Infectious diseases;Infectious diseases;Immune system	ko05169//Epstein-Barr virus infection;ko05170//Human immunodeficiency virus 1 infection;ko05163//Human cytomegalovirus infection;ko05168//Herpes simplex infection;ko04612//Antigen processing and presentation	K08058;K08058;K08058;K08058;K08058	GO:0016020//membrane;GO:0016021//integral component of membrane;GO:0042824//MHC class I peptide loading complex	GO:0062061//TAP complex binding	GO:0002397//MHC class I protein complex assembly;GO:0019885//antigen processing and presentation of endogenous peptide antigen via MHC class I;GO:0065003//protein-containing complex assembly
ENSMUST00000234247	457013	271388.03125	362502.78125	878326.3125	794795.875	1032191.8125	363634.604166667	901771.333333333	1.31027215276626	2.21034514089309e-05	0.00101927052065274	Tapbp	TAP binding protein [Source:MGI Symbol;Acc:MGI:1201689]	Human Diseases;Human Diseases;Human Diseases;Human Diseases;Organismal Systems	Infectious diseases;Infectious disease: viral;Infectious diseases;Infectious diseases;Immune system	ko05169//Epstein-Barr virus infection;ko05170//Human immunodeficiency virus 1 infection;ko05163//Human cytomegalovirus infection;ko05168//Herpes simplex infection;ko04612//Antigen processing and presentation	K08058;K08058;K08058;K08058;K08058	GO:0000139//Golgi membrane;GO:0005783//endoplasmic reticulum;GO:0005789//endoplasmic reticulum membrane;GO:0005887//integral component of plasma membrane;GO:0016020//membrane;GO:0016021//integral component of membrane;GO:0030670//phagocytic vesicle membrane;GO:0042824//MHC class I peptide loading complex	GO:0005515//protein binding;GO:0046978//TAP1 binding;GO:0046979//TAP2 binding;GO:0062061//TAP complex binding	GO:0002398//MHC class Ib protein complex assembly;GO:0002479//antigen processing and presentation of exogenous peptide antigen via MHC class I, TAP-dependent;GO:0006952//defense response;GO:0010468//regulation of gene expression;GO:0019885//antigen processing and presentation of endogenous peptide antigen via MHC class I;GO:0050823//peptide antigen stabilization;GO:0061635//regulation of protein …
ENSMUST00000103410	1102638.75	763083.625	2753636.75	5420805	5157369.5	6839970	1539786.375	5806048.16666667	1.91482633059337	2.53558877018355e-05	0.00114326880326721	Igkc	immunoglobulin kappa constant [Source:MGI Symbol;Acc:MGI:96495]	-	-	-	-	-	-	-
ENSMUST00000028987	8757.0927734375	7489.48486328125	162213.203125	286225.71875	295558.6875	262241.125	59486.5935872396	281341.84375	2.24168766755874	2.62423963895955e-05	0.00117454019723138	Bpifb1	BPI fold containing family B, member 1 [Source:MGI Symbol;Acc:MGI:2137431]	-	-	-	-	GO:0005576//extracellular region;GO:0005615//extracellular space	GO:0008289//lipid binding	GO:0002227//innate immune response in mucosa;GO:0002376//immune system process;GO:0034144//negative regulation of toll-like receptor 4 signaling pathway;GO:0045087//innate immune response
ENSMUST00000081816	8757.0927734375	7489.48486328125	162213.203125	286225.71875	295558.6875	262241.125	59486.5935872396	281341.84375	2.24168766755874	2.62423963895955e-05	0.00117454019723138	Bpifb1	BPI fold containing family B, member 1 [Source:MGI Symbol;Acc:MGI:2137431]	-	-	-	-	GO:0005576//extracellular region;GO:0005615//extracellular space	GO:0008289//lipid binding	GO:0002227//innate immune response in mucosa;GO:0002376//immune system process;GO:0034144//negative regulation of toll-like receptor 4 signaling pathway;GO:0045087//innate immune response
ENSMUST00000040655	607236.125	587254.625	521757.8125	1237758.75	840869.5625	1519590.125	572082.854166667	1199406.14583333	1.06802425912096	2.96992172555813e-05	0.00129127953881945	H2-Aa	histocompatibility 2, class II antigen A, alpha [Source:MGI Symbol;Acc:MGI:95895]	Human Diseases;Human Diseases;Human Diseases;Cellular Processes;Human Diseases;Human Diseases;Human Diseases;Human Diseases;Human Diseases;Organismal Systems;Human Diseases;Environmental Information Processing;Human Diseases;Human Diseases;Organismal Systems;Human Diseases;Human Diseases;Organismal Systems;Human Diseases;Organismal Systems;Organismal Systems;Human Diseases;Human Diseases;Human Di…	Infectious diseases;Infectious diseases;Infectious diseases;Transport and catabolism;Infectious diseases;Immune diseases;Infectious diseases;Cardiovascular diseases;Infectious diseases;Immune system;Infectious diseases;Signaling molecules and interaction;Immune diseases;Infectious diseases;Immune system;Immune diseases;Immune diseases;Immune system;Immune diseases;Immune system;Immune system;Immu…	ko05169//Epstein-Barr virus infection;ko05152//Tuberculosis;ko05168//Herpes simplex infection;ko04145//Phagosome;ko05166//HTLV-I infection;ko05322//Systemic lupus erythematosus;ko05164//Influenza A;ko05416//Viral myocarditis;ko05145//Toxoplasmosis;ko04640//Hematopoietic cell lineage;ko05140//Leishmaniasis;ko04514//Cell adhesion molecules (CAMs);ko05323//Rheumatoid arthritis;ko05150//Staphylococcu…	K06752;K06752;K06752;K06752;K06752;K06752;K06752;K06752;K06752;K06752;K06752;K06752;K06752;K06752;K06752;K06752;K06752;K06752;K06752;K06752;K06752;K06752;K06752;K06752	GO:0005764//lysosome;GO:0005886//plasma membrane;GO:0009897//external side of plasma membrane;GO:0016020//membrane;GO:0016021//integral component of membrane;GO:0042613//MHC class II protein complex	GO:0005515//protein binding;GO:0042605//peptide antigen binding;GO:0044877//protein-containing complex binding	GO:0002250//adaptive immune response;GO:0002376//immune system process;GO:0002504//antigen processing and presentation of peptide or polysaccharide antigen via MHC class II;GO:0006955//immune response;GO:0019882//antigen processing and presentation;GO:0019886//antigen processing and presentation of exogenous peptide antigen via MHC class II;GO:0034341//response to interferon-gamma;GO:0042130//neg…
ENSMUST00000174751	607236.125	587254.625	521757.8125	1237758.75	840869.5625	1519590.125	572082.854166667	1199406.14583333	1.06802425912096	2.96992172555813e-05	0.00129127953881945	H2-Aa	histocompatibility 2, class II antigen A, alpha [Source:MGI Symbol;Acc:MGI:95895]	Human Diseases;Human Diseases;Human Diseases;Cellular Processes;Human Diseases;Human Diseases;Human Diseases;Human Diseases;Human Diseases;Organismal Systems;Human Diseases;Environmental Information Processing;Human Diseases;Human Diseases;Organismal Systems;Human Diseases;Human Diseases;Organismal Systems;Human Diseases;Organismal Systems;Organismal Systems;Human Diseases;Human Diseases;Human Di…	Infectious diseases;Infectious diseases;Infectious diseases;Transport and catabolism;Infectious diseases;Immune diseases;Infectious diseases;Cardiovascular diseases;Infectious diseases;Immune system;Infectious diseases;Signaling molecules and interaction;Immune diseases;Infectious diseases;Immune system;Immune diseases;Immune diseases;Immune system;Immune diseases;Immune system;Immune system;Immu…	ko05169//Epstein-Barr virus infection;ko05152//Tuberculosis;ko05168//Herpes simplex infection;ko04145//Phagosome;ko05166//HTLV-I infection;ko05322//Systemic lupus erythematosus;ko05164//Influenza A;ko05416//Viral myocarditis;ko05145//Toxoplasmosis;ko04640//Hematopoietic cell lineage;ko05140//Leishmaniasis;ko04514//Cell adhesion molecules (CAMs);ko05323//Rheumatoid arthritis;ko05150//Staphylococcu…	K06752;K06752;K06752;K06752;K06752;K06752;K06752;K06752;K06752;K06752;K06752;K06752;K06752;K06752;K06752;K06752;K06752;K06752;K06752;K06752;K06752;K06752;K06752;K06752	GO:0016020//membrane;GO:0016021//integral component of membrane	-	-
ENSMUST00000058488	117430.078125	90999.2578125	95954.53125	202425.3125	164609.5	214447.984375	101461.2890625	193827.598958333	0.933844614490511	2.99902291487396e-05	0.00129468457325091	Tmed3	transmembrane p24 trafficking protein 3 [Source:MGI Symbol;Acc:MGI:1913361]	-	-	-	-	GO:0005783//endoplasmic reticulum;GO:0005789//endoplasmic reticulum membrane;GO:0005793//endoplasmic reticulum-Golgi intermediate compartment;GO:0005794//Golgi apparatus;GO:0016020//membrane;GO:0016021//integral component of membrane;GO:0030126//COPI vesicle coat;GO:0030134//COPII-coated ER to Golgi transport vesicle;GO:0030663//COPI-coated vesicle membrane;GO:0031410//cytoplasmic vesicle;GO:0032…	GO:0003674//molecular_function	GO:0006886//intracellular protein transport;GO:0006888//ER to Golgi vesicle-mediated transport;GO:0007030//Golgi organization;GO:0015031//protein transport
ENSMUST00000057311	184481	78474.8828125	96625.03125	193671.09375	109122.578125	436659.96875	119860.3046875	246484.546875	1.04014325459411	3.18930705789135e-05	0.00136713465221019	Sfn	stratifin [Source:MGI Symbol;Acc:MGI:1891831]	Cellular Processes;Cellular Processes;Organismal Systems	Cell growth and death;Cell growth and death;Excretory system	ko04110//Cell cycle;ko04115//p53 signaling pathway;ko04960//Aldosterone-regulated sodium reabsorption	K06644;K06644;K06644	GO:0005576//extracellular region;GO:0005634//nucleus;GO:0005737//cytoplasm;GO:0005829//cytosol	GO:0005515//protein binding;GO:0019901//protein kinase binding;GO:0019904//protein domain specific binding;GO:0042802//identical protein binding;GO:0051219//phosphoprotein binding	GO:0000079//regulation of cyclin-dependent protein serine/threonine kinase activity;GO:0001836//release of cytochrome c from mitochondria;GO:0003334//keratinocyte development;GO:0008630//intrinsic apoptotic signaling pathway in response to DNA damage;GO:0010482//regulation of epidermal cell division;GO:0010839//negative regulation of keratinocyte proliferation;GO:0030216//keratinocyte differentia…
ENSMUST00000035077	803786.125	1781543.125	2175090.75	797546.8125	937890.875	1407447.375	1586806.66666667	1047628.35416667	-0.598999351801826	4.06228751691097e-05	0.00169364000790665	Ltf	lactotransferrin [Source:MGI Symbol;Acc:MGI:96837]	-	-	-	-	GO:0005576//extracellular region;GO:0005615//extracellular space;GO:0005737//cytoplasm;GO:0009986//cell surface;GO:0030141//secretory granule;GO:0032991//protein-containing complex;GO:0042581//specific granule	GO:0001530//lipopolysaccharide binding;GO:0004252//serine-type endopeptidase activity;GO:0004869//cysteine-type endopeptidase inhibitor activity;GO:0005506//iron ion binding;GO:0008201//heparin binding;GO:0008233//peptidase activity;GO:0008236//serine-type peptidase activity;GO:0016787//hydrolase activity;GO:0043539//protein serine/threonine kinase activator activity;GO:0046872//metal ion binding	GO:0001503//ossification;GO:0001817//regulation of cytokine production;GO:0002227//innate immune response in mucosa;GO:0002376//immune system process;GO:0006508//proteolysis;GO:0006811//ion transport;GO:0019731//antibacterial humoral response;GO:0019732//antifungal humoral response;GO:0031640//killing of cells of other organism;GO:0031665//negative regulation of lipopolysaccharide-mediated signal…
ENSMUST00000045593	25671.697265625	22554.830078125	45160.25	95539.328125	60931.68359375	76255.9375	31128.92578125	77575.6497395833	1.31734808304861	4.17185333904044e-05	0.00172748784181899	Daglb	diacylglycerol lipase, beta [Source:MGI Symbol;Acc:MGI:2442032]	Organismal Systems;Organismal Systems	Nervous system;Endocrine system	ko04723//Retrograde endocannabinoid signaling;ko04925//Aldosterone synthesis and secretion	K13806;K13806	GO:0005654//nucleoplasm;GO:0005886//plasma membrane;GO:0016020//membrane;GO:0016021//integral component of membrane;GO:0045211//postsynaptic membrane	GO:0016787//hydrolase activity;GO:0046872//metal ion binding	GO:0006629//lipid metabolic process;GO:0007216//G protein-coupled glutamate receptor signaling pathway;GO:0007405//neuroblast proliferation;GO:0016042//lipid catabolic process;GO:0019369//arachidonic acid metabolic process;GO:0022008//neurogenesis;GO:0042136//neurotransmitter biosynthetic process;GO:0046340//diacylglycerol catabolic process;GO:0071926//endocannabinoid signaling pathway;GO:0098921…
ENSMUST00000032210	145738.375	108762.890625	134869.046875	254207.6875	250468.875	191084.453125	129790.104166667	231920.338541667	0.837448955069279	4.21038902351942e-05	0.00173166472879478	Mfap5	microfibrillar associated protein 5 [Source:MGI Symbol;Acc:MGI:1354387]	-	-	-	-	GO:0001527//microfibril	-	-
ENSMUST00000118626	145738.375	108762.890625	134869.046875	254207.6875	250468.875	191084.453125	129790.104166667	231920.338541667	0.837448955069279	4.21038902351942e-05	0.00173166472879478	Mfap5	microfibrillar associated protein 5 [Source:MGI Symbol;Acc:MGI:1354387]	-	-	-	-	GO:0001527//microfibril	-	-
ENSMUST00000142896	145738.375	108762.890625	134869.046875	254207.6875	250468.875	191084.453125	129790.104166667	231920.338541667	0.837448955069279	4.21038902351942e-05	0.00173166472879478	Mfap5	microfibrillar associated protein 5 [Source:MGI Symbol;Acc:MGI:1354387]	-	-	-	-	GO:0001527//microfibril	-	-
ENSMUST00000148517	145738.375	108762.890625	134869.046875	254207.6875	250468.875	191084.453125	129790.104166667	231920.338541667	0.837448955069279	4.21038902351942e-05	0.00173166472879478	Mfap5	microfibrillar associated protein 5 [Source:MGI Symbol;Acc:MGI:1354387]	-	-	-	-	GO:0001527//microfibril;GO:0005576//extracellular region;GO:0031012//extracellular matrix;GO:0062023//collagen-containing extracellular matrix	GO:0005515//protein binding;GO:0030023//extracellular matrix constituent conferring elasticity	GO:0060216//definitive hemopoiesis;GO:0097435//supramolecular fiber organization
ENSMUST00000058845	71726.4765625	69419.78125	96562.5625	139015.8125	148064.15625	172513.828125	79236.2734375	153197.932291667	0.951163889857499	4.32442075589527e-05	0.00176458173167012	Basp1	brain abundant, membrane attached signal protein 1 [Source:MGI Symbol;Acc:MGI:1917600]	-	-	-	-	GO:0000785//chromatin;GO:0005634//nucleus;GO:0005737//cytoplasm;GO:0005886//plasma membrane;GO:0008180//COP9 signalosome;GO:0016020//membrane;GO:0016363//nuclear matrix;GO:0016605//PML body;GO:0016607//nuclear speck;GO:0030054//cell junction;GO:0030426//growth cone;GO:0042995//cell projection	GO:0003714//transcription corepressor activity;GO:0005515//protein binding;GO:0019904//protein domain specific binding;GO:0044212//transcription regulatory region DNA binding	GO:0045892//negative regulation of transcription, DNA-templated;GO:0072112//glomerular visceral epithelial cell differentiation
ENSMUST00000065060	57406.38671875	100397.15625	86307.65625	26662.482421875	59354.421875	51939.0390625	81370.3997395833	45985.314453125	-0.823330872316467	4.48990425883886e-05	0.00179730318469994	Tmcc3	transmembrane and coiled coil domains 3 [Source:MGI Symbol;Acc:MGI:2442900]	-	-	-	-	GO:0005783//endoplasmic reticulum;GO:0005789//endoplasmic reticulum membrane;GO:0012505//endomembrane system;GO:0016020//membrane;GO:0016021//integral component of membrane	GO:0042802//identical protein binding;GO:0071889//14-3-3 protein binding	GO:0008150//biological_process
ENSMUST00000117460	57406.38671875	100397.15625	86307.65625	26662.482421875	59354.421875	51939.0390625	81370.3997395833	45985.314453125	-0.823330872316467	4.48990425883886e-05	0.00179730318469994	Tmcc3	transmembrane and coiled coil domains 3 [Source:MGI Symbol;Acc:MGI:2442900]	-	-	-	-	GO:0005783//endoplasmic reticulum;GO:0005789//endoplasmic reticulum membrane;GO:0012505//endomembrane system;GO:0016020//membrane;GO:0016021//integral component of membrane	GO:0042802//identical protein binding;GO:0071889//14-3-3 protein binding	GO:0008150//biological_process
ENSMUST00000117929	57406.38671875	100397.15625	86307.65625	26662.482421875	59354.421875	51939.0390625	81370.3997395833	45985.314453125	-0.823330872316467	4.48990425883886e-05	0.00179730318469994	Tmcc3	transmembrane and coiled coil domains 3 [Source:MGI Symbol;Acc:MGI:2442900]	-	-	-	-	GO:0005783//endoplasmic reticulum;GO:0005789//endoplasmic reticulum membrane;GO:0012505//endomembrane system;GO:0016020//membrane;GO:0016021//integral component of membrane	GO:0042802//identical protein binding;GO:0071889//14-3-3 protein binding	GO:0008150//biological_process
ENSMUST00000121471	57406.38671875	100397.15625	86307.65625	26662.482421875	59354.421875	51939.0390625	81370.3997395833	45985.314453125	-0.823330872316467	4.48990425883886e-05	0.00179730318469994	Tmcc3	transmembrane and coiled coil domains 3 [Source:MGI Symbol;Acc:MGI:2442900]	-	-	-	-	GO:0005783//endoplasmic reticulum;GO:0005789//endoplasmic reticulum membrane;GO:0012505//endomembrane system;GO:0016020//membrane;GO:0016021//integral component of membrane	GO:0042802//identical protein binding;GO:0071889//14-3-3 protein binding	GO:0008150//biological_process
ENSMUST00000097897	1441045.125	1579361	1409278.875	702303.0625	815284.25	1009807.25	1476561.66666667	842464.854166667	-0.809553203492908	4.5176176648446e-05	0.00179730318469994	Macf1	microtubule-actin crosslinking factor 1 [Source:MGI Symbol;Acc:MGI:108559]	-	-	-	-	GO:0005737//cytoplasm;GO:0005794//Golgi apparatus;GO:0005856//cytoskeleton;GO:0005874//microtubule;GO:0005886//plasma membrane;GO:0032587//ruffle membrane	GO:0003779//actin binding;GO:0005509//calcium ion binding;GO:0005515//protein binding;GO:0008017//microtubule binding;GO:0008092//cytoskeletal protein binding;GO:0051011//microtubule minus-end binding;GO:0051015//actin filament binding	GO:0007010//cytoskeleton organization;GO:0030334//regulation of cell migration;GO:0032886//regulation of microtubule-based process;GO:0043001//Golgi to plasma membrane protein transport;GO:0045773//positive regulation of axon extension;GO:0051893//regulation of focal adhesion assembly
ENSMUST00000106224	1441045.125	1579361	1409278.875	702303.0625	815284.25	1009807.25	1476561.66666667	842464.854166667	-0.809553203492908	4.5176176648446e-05	0.00179730318469994	Macf1	microtubule-actin crosslinking factor 1 [Source:MGI Symbol;Acc:MGI:108559]	-	-	-	-	GO:0005856//cytoskeleton	GO:0003779//actin binding;GO:0005509//calcium ion binding;GO:0005515//protein binding;GO:0008017//microtubule binding;GO:0008092//cytoskeletal protein binding	GO:0007010//cytoskeleton organization
ENSMUST00000092888	128152.703125	145800.78125	120299.828125	277250.96875	282929.5	472173.6875	131417.770833333	344118.052083333	1.38874320056639	4.61013388097851e-05	0.00182220032035819	Fbp1	fructose bisphosphatase 1 [Source:MGI Symbol;Acc:MGI:95492]	Metabolism;Organismal Systems;Metabolism;Environmental Information Processing;Organismal Systems;Metabolism;Metabolism;Metabolism	Global and overview maps;Endocrine system;Global and overview maps;Signal transduction;Endocrine system;Carbohydrate metabolism;Carbohydrate metabolism;Carbohydrate metabolism	ko01100//Metabolic pathways;ko04910//Insulin signaling pathway;ko01200//Carbon metabolism;ko04152//AMPK signaling pathway;ko04922//Glucagon signaling pathway;ko00010//Glycolysis / Gluconeogenesis;ko00051//Fructose and mannose metabolism;ko00030//Pentose phosphate pathway	K03841;K03841;K03841;K03841;K03841;K03841;K03841;K03841	GO:0005634//nucleus;GO:0005737//cytoplasm;GO:0005829//cytosol	GO:0001085//RNA polymerase II transcription factor binding;GO:0003824//catalytic activity;GO:0016208//AMP binding;GO:0016787//hydrolase activity;GO:0016791//phosphatase activity;GO:0042132//fructose 1,6-bisphosphate 1-phosphatase activity;GO:0042578//phosphoric ester hydrolase activity;GO:0042802//identical protein binding;GO:0046872//metal ion binding;GO:0048029//monosaccharide binding	GO:0000122//negative regulation of transcription by RNA polymerase II;GO:0005975//carbohydrate metabolic process;GO:0005986//sucrose biosynthetic process;GO:0006000//fructose metabolic process;GO:0006002//fructose 6-phosphate metabolic process;GO:0006094//gluconeogenesis;GO:0006111//regulation of gluconeogenesis;GO:0008152//metabolic process;GO:0016311//dephosphorylation;GO:0030308//negative regu…
ENSMUST00000055087	251169.796875	261442.6875	296838.9375	375163.4375	373322.15625	561188.9375	269817.140625	436558.177083333	0.694191923611922	4.91602069417418e-05	0.00191819345932296	Syk	spleen tyrosine kinase [Source:MGI Symbol;Acc:MGI:99515]	Environmental Information Processing;Human Diseases;Human Diseases;Human Diseases;Environmental Information Processing;Human Diseases;Human Diseases;Organismal Systems;Environmental Information Processing;Organismal Systems;Organismal Systems;Organismal Systems;Organismal Systems;Organismal Systems;Organismal Systems	Signal transduction;Infectious diseases;Infectious diseases;Cancers;Signal transduction;Infectious diseases;Infectious diseases;Immune system;Signal transduction;Immune system;Immune system;Immune system;Development;Immune system;Immune system	ko04151//PI3K-Akt signaling pathway;ko05169//Epstein-Barr virus infection;ko05152//Tuberculosis;ko05203//Viral carcinogenesis;ko04072//Phospholipase D signaling pathway;ko05168//Herpes simplex infection;ko05167//Kaposi sarcoma-associated herpesvirus infection;ko04666//Fc gamma R-mediated phagocytosis;ko04064//NF-kappa B signaling pathway;ko04662//B cell receptor signaling pathway;ko04611//Platele…	K05855;K05855;K05855;K05855;K05855;K05855;K05855;K05855;K05855;K05855;K05855;K05855;K05855;K05855;K05855	GO:0005634//nucleus;GO:0005737//cytoplasm;GO:0005829//cytosol;GO:0005886//plasma membrane;GO:0016020//membrane;GO:0019815//B cell receptor complex;GO:0031410//cytoplasmic vesicle;GO:0032009//early phagosome;GO:0032991//protein-containing complex;GO:0042101//T cell receptor complex;GO:0045335//phagocytic vesicle	GO:0000166//nucleotide binding;GO:0001784//phosphotyrosine residue binding;GO:0004672//protein kinase activity;GO:0004674//protein serine/threonine kinase activity;GO:0004713//protein tyrosine kinase activity;GO:0004715//non-membrane spanning protein tyrosine kinase activity;GO:0005178//integrin binding;GO:0005515//protein binding;GO:0005524//ATP binding;GO:0016170//interleukin-15 receptor bindin…	GO:0000187//activation of MAPK activity;GO:0001525//angiogenesis;GO:0001820//serotonin secretion;GO:0001945//lymph vessel development;GO:0002092//positive regulation of receptor internalization;GO:0002250//adaptive immune response;GO:0002281//macrophage activation involved in immune response;GO:0002283//neutrophil activation involved in immune response;GO:0002366//leukocyte activation involved in…
ENSMUST00000120135	251169.796875	261442.6875	296838.9375	375163.4375	373322.15625	561188.9375	269817.140625	436558.177083333	0.694191923611922	4.91602069417418e-05	0.00191819345932296	Syk	spleen tyrosine kinase [Source:MGI Symbol;Acc:MGI:99515]	Environmental Information Processing;Human Diseases;Human Diseases;Human Diseases;Environmental Information Processing;Human Diseases;Human Diseases;Organismal Systems;Environmental Information Processing;Organismal Systems;Organismal Systems;Organismal Systems;Organismal Systems;Organismal Systems;Organismal Systems	Signal transduction;Infectious diseases;Infectious diseases;Cancers;Signal transduction;Infectious diseases;Infectious diseases;Immune system;Signal transduction;Immune system;Immune system;Immune system;Development;Immune system;Immune system	ko04151//PI3K-Akt signaling pathway;ko05169//Epstein-Barr virus infection;ko05152//Tuberculosis;ko05203//Viral carcinogenesis;ko04072//Phospholipase D signaling pathway;ko05168//Herpes simplex infection;ko05167//Kaposi sarcoma-associated herpesvirus infection;ko04666//Fc gamma R-mediated phagocytosis;ko04064//NF-kappa B signaling pathway;ko04662//B cell receptor signaling pathway;ko04611//Platele…	K05855;K05855;K05855;K05855;K05855;K05855;K05855;K05855;K05855;K05855;K05855;K05855;K05855;K05855;K05855	GO:0005634//nucleus;GO:0005737//cytoplasm;GO:0005829//cytosol;GO:0005886//plasma membrane;GO:0016020//membrane;GO:0019815//B cell receptor complex;GO:0031410//cytoplasmic vesicle;GO:0032009//early phagosome;GO:0032991//protein-containing complex;GO:0042101//T cell receptor complex;GO:0045335//phagocytic vesicle	GO:0000166//nucleotide binding;GO:0001784//phosphotyrosine residue binding;GO:0004672//protein kinase activity;GO:0004674//protein serine/threonine kinase activity;GO:0004713//protein tyrosine kinase activity;GO:0004715//non-membrane spanning protein tyrosine kinase activity;GO:0005178//integrin binding;GO:0005515//protein binding;GO:0005524//ATP binding;GO:0016170//interleukin-15 receptor bindin…	GO:0000187//activation of MAPK activity;GO:0001525//angiogenesis;GO:0001820//serotonin secretion;GO:0001945//lymph vessel development;GO:0002092//positive regulation of receptor internalization;GO:0002250//adaptive immune response;GO:0002281//macrophage activation involved in immune response;GO:0002283//neutrophil activation involved in immune response;GO:0002366//leukocyte activation involved in…
ENSMUST00000040097	259210.625	289636.03125	237520.59375	159229.328125	159255.0625	179982.90625	262122.416666667	166155.765625	-0.657704382399275	5.21621930268588e-05	0.00198537542477012	Palmd	palmdelphin [Source:MGI Symbol;Acc:MGI:2148896]	-	-	-	-	GO:0016020//membrane	-	GO:0008360//regulation of cell shape
ENSMUST00000074898	400522.375	534582.8125	558705.9375	523543.6875	1215524.75	1325143.25	497937.041666667	1021403.89583333	1.03651821992344	5.22969094498269e-05	0.00198537542477012	Hp	haptoglobin [Source:MGI Symbol;Acc:MGI:96211]	-	-	-	-	GO:0005576//extracellular region;GO:0005615//extracellular space;GO:0005783//endoplasmic reticulum;GO:0005794//Golgi apparatus;GO:0031838//haptoglobin-hemoglobin complex;GO:0072562//blood microparticle	GO:0004252//serine-type endopeptidase activity;GO:0016209//antioxidant activity;GO:0030492//hemoglobin binding;GO:0042802//identical protein binding	GO:0001889//liver development;GO:0002376//immune system process;GO:0002526//acute inflammatory response;GO:0006508//proteolysis;GO:0006953//acute-phase response;GO:0007219//Notch signaling pathway;GO:0009617//response to bacterium;GO:0010033//response to organic substance;GO:0010942//positive regulation of cell death;GO:0042542//response to hydrogen peroxide;GO:0042742//defense response to bacter…
ENSMUST00000068944	161885.78125	179473.3125	248848.375	323081.15625	321859.75	338104.15625	196735.822916667	327681.6875	0.736035373407606	5.2656571431053e-05	0.00198537542477012	Plekho2	pleckstrin homology domain containing, family O member 2 [Source:MGI Symbol;Acc:MGI:2143132]	-	-	-	-	GO:0005575//cellular_component	GO:0003674//molecular_function	GO:0008150//biological_process
ENSMUST00000031320	1122420.5	1622918.25	1205735.375	713555.375	937958.0625	932833.5	1317024.70833333	861448.979166667	-0.612445153909882	5.30269772742955e-05	0.00198537542477012	Pf4	platelet factor 4 [Source:MGI Symbol;Acc:MGI:1888711]	Organismal Systems;Environmental Information Processing;Environmental Information Processing	Immune system;Signaling molecules and interaction;Signaling molecules and interaction	ko04062//Chemokine signaling pathway;ko04060//Cytokine-cytokine receptor interaction;ko04061//Viral protein interaction with cytokine and cytokine receptor	K05407;K05407;K05407	GO:0005576//extracellular region;GO:0005615//extracellular space;GO:0005737//cytoplasm;GO:0020005//symbiont-containing vacuole membrane;GO:0030430//host cell cytoplasm;GO:0031091//platelet alpha granule;GO:0031982//vesicle;GO:0032991//protein-containing complex;GO:0062023//collagen-containing extracellular matrix	GO:0005125//cytokine activity;GO:0008009//chemokine activity;GO:0008201//heparin binding;GO:0045236//CXCR chemokine receptor binding;GO:0048248//CXCR3 chemokine receptor binding	GO:0006935//chemotaxis;GO:0006952//defense response;GO:0006954//inflammatory response;GO:0006955//immune response;GO:0007165//signal transduction;GO:0007189//adenylate cyclase-activating G protein-coupled receptor signaling pathway;GO:0010628//positive regulation of gene expression;GO:0010744//positive regulation of macrophage derived foam cell differentiation;GO:0016525//negative regulation of a…
ENSMUST00000049004	218594.984375	206568.609375	244336.671875	363594.625	449070.75	267705.78125	223166.755208333	360123.71875	0.690370495347056	5.31651378737521e-05	0.00198537542477012	Anpep	alanyl (membrane) aminopeptidase [Source:MGI Symbol;Acc:MGI:5000466]	Metabolism;Organismal Systems;Metabolism;Organismal Systems	Global and overview maps;Immune system;Metabolism of other amino acids;Endocrine system	ko01100//Metabolic pathways;ko04640//Hematopoietic cell lineage;ko00480//Glutathione metabolism;ko04614//Renin-angiotensin system	K11140;K11140;K11140;K11140	GO:0005615//extracellular space;GO:0005737//cytoplasm;GO:0005793//endoplasmic reticulum-Golgi intermediate compartment;GO:0005886//plasma membrane;GO:0009897//external side of plasma membrane;GO:0016020//membrane;GO:0016021//integral component of membrane;GO:0031526//brush border membrane;GO:0070062//extracellular exosome	GO:0004177//aminopeptidase activity;GO:0008233//peptidase activity;GO:0008237//metallopeptidase activity;GO:0008270//zinc ion binding;GO:0016787//hydrolase activity;GO:0042277//peptide binding;GO:0046872//metal ion binding;GO:0070006//metalloaminopeptidase activity	GO:0001525//angiogenesis;GO:0006508//proteolysis;GO:0007275//multicellular organism development;GO:0030154//cell differentiation;GO:0035814//negative regulation of renal sodium excretion;GO:0043171//peptide catabolic process
ENSMUST00000107392	218594.984375	206568.609375	244336.671875	363594.625	449070.75	267705.78125	223166.755208333	360123.71875	0.690370495347056	5.31651378737521e-05	0.00198537542477012	Anpep	alanyl (membrane) aminopeptidase [Source:MGI Symbol;Acc:MGI:5000466]	Metabolism;Organismal Systems;Metabolism;Organismal Systems	Global and overview maps;Immune system;Metabolism of other amino acids;Endocrine system	ko01100//Metabolic pathways;ko04640//Hematopoietic cell lineage;ko00480//Glutathione metabolism;ko04614//Renin-angiotensin system	K11140;K11140;K11140;K11140	GO:0005615//extracellular space;GO:0005737//cytoplasm;GO:0005793//endoplasmic reticulum-Golgi intermediate compartment;GO:0005886//plasma membrane;GO:0009897//external side of plasma membrane;GO:0016020//membrane;GO:0016021//integral component of membrane;GO:0031526//brush border membrane;GO:0070062//extracellular exosome	GO:0004177//aminopeptidase activity;GO:0008233//peptidase activity;GO:0008237//metallopeptidase activity;GO:0008270//zinc ion binding;GO:0016787//hydrolase activity;GO:0042277//peptide binding;GO:0046872//metal ion binding;GO:0070006//metalloaminopeptidase activity	GO:0001525//angiogenesis;GO:0006508//proteolysis;GO:0007275//multicellular organism development;GO:0030154//cell differentiation;GO:0035814//negative regulation of renal sodium excretion;GO:0043171//peptide catabolic process
ENSMUST00000028080	1255410.5	1540782.375	1259564.5	704834.875	802218.9375	1036932.6875	1351919.125	847995.5	-0.672880334701624	5.63029490397958e-05	0.00207706697457719	Nebl	nebulette [Source:MGI Symbol;Acc:MGI:1921353]	-	-	-	-	GO:0005737//cytoplasm;GO:0030018//Z disc	GO:0003779//actin binding;GO:0005515//protein binding;GO:0046872//metal ion binding;GO:0051015//actin filament binding	GO:0048747//muscle fiber development;GO:0071691//cardiac muscle thin filament assembly
ENSMUST00000103320	117949.8046875	199300.953125	123443.265625	1117927.125	978191.625	889564.25	146898.0078125	995227.666666667	2.76021176136601	5.90081663283953e-05	0.00216375125566833	Igkv14-111	immunoglobulin kappa variable 14-111 [Source:MGI Symbol;Acc:MGI:4439863]	-	-	-	-	GO:0005615//extracellular space	-	GO:0002377//immunoglobulin production;GO:0006955//immune response
ENSMUST00000026050	850107.5	1108691.375	1077624.625	2560469.75	2001282.375	2144933.5	1012141.16666667	2235561.875	1.1432269552763	6.73784207978708e-05	0.00244126456783714	Gsto1	glutathione S-transferase omega 1 [Source:MGI Symbol;Acc:MGI:1342273]	Metabolism;Human Diseases;Human Diseases;Human Diseases;Human Diseases;Metabolism;Human Diseases;Metabolism;Metabolism;Metabolism	Global and overview maps;Cancers;Cancers;Cardiovascular diseases;Drug resistance;Xenobiotics biodegradation and metabolism;Cancers;Metabolism of other amino acids;Xenobiotics biodegradation and metabolism;Xenobiotics biodegradation and metabolism	ko01100//Metabolic pathways;ko05200//Pathways in cancer;ko05225//Hepatocellular carcinoma;ko05418//Fluid shear stress and atherosclerosis;ko01524//Platinum drug resistance;ko00983//Drug metabolism - other enzymes;ko05204//Chemical carcinogenesis;ko00480//Glutathione metabolism;ko00980//Metabolism of xenobiotics by cytochrome P450;ko00982//Drug metabolism - cytochrome P450	K00799;K00799;K00799;K00799;K00799;K00799;K00799;K00799;K00799;K00799	GO:0005604//basement membrane;GO:0005623//cell;GO:0005654//nucleoplasm;GO:0005737//cytoplasm;GO:0005829//cytosol;GO:0030424//axon;GO:0031965//nuclear membrane;GO:0043209//myelin sheath;GO:0044297//cell body	GO:0004364//glutathione transferase activity;GO:0005515//protein binding;GO:0016491//oxidoreductase activity;GO:0016740//transferase activity;GO:0045174//glutathione dehydrogenase (ascorbate) activity;GO:0050610//methylarsonate reductase activity	GO:0010880//regulation of release of sequestered calcium ion into cytosol by sarcoplasmic reticulum;GO:0019852//L-ascorbic acid metabolic process;GO:0019853//L-ascorbic acid biosynthetic process;GO:0042178//xenobiotic catabolic process;GO:0055114//oxidation-reduction process;GO:0060315//negative regulation of ryanodine-sensitive calcium-release channel activity;GO:0060316//positive regulation of …
ENSMUST00000034121	256479.9375	243513.359375	239417.859375	501499.34375	480309.625	481901.9375	246470.385416667	487903.635416667	0.985181922583532	7.56987129829338e-05	0.00267894224376231	Man2b1	mannosidase 2, alpha B1 [Source:MGI Symbol;Acc:MGI:107286]	Cellular Processes;Metabolism	Transport and catabolism;Glycan biosynthesis and metabolism	ko04142//Lysosome;ko00511//Other glycan degradation	K12311;K12311	GO:0005615//extracellular space;GO:0005764//lysosome;GO:0005774//vacuolar membrane	GO:0003824//catalytic activity;GO:0004559//alpha-mannosidase activity;GO:0005537//mannose binding;GO:0016787//hydrolase activity;GO:0016798//hydrolase activity, acting on glycosyl bonds;GO:0030246//carbohydrate binding;GO:0046872//metal ion binding	GO:0005975//carbohydrate metabolic process;GO:0006013//mannose metabolic process;GO:0006464//cellular protein modification process;GO:0006517//protein deglycosylation;GO:0007611//learning or memory;GO:0008152//metabolic process
ENSMUST00000065090	339149.71875	125800.0234375	406301.46875	647541.5625	627481.6875	576541.9375	290417.0703125	617188.395833333	1.08758468166229	7.69729444232188e-05	0.0026995078184265	Flnc	filamin C, gamma [Source:MGI Symbol;Acc:MGI:95557]	Human Diseases;Environmental Information Processing;Cellular Processes;Human Diseases	Infectious diseases;Signal transduction;Cellular community - eukaryotes;Cancers	ko05132//Salmonella infection;ko04010//MAPK signaling pathway;ko04510//Focal adhesion;ko05205//Proteoglycans in cancer	K04437;K04437;K04437;K04437	GO:0005737//cytoplasm;GO:0005829//cytosol;GO:0005856//cytoskeleton;GO:0005886//plasma membrane;GO:0015629//actin cytoskeleton;GO:0016020//membrane;GO:0016528//sarcoplasm;GO:0030018//Z disc;GO:0042383//sarcolemma	GO:0003779//actin binding;GO:0005515//protein binding;GO:0008092//cytoskeletal protein binding;GO:0030506//ankyrin binding;GO:0042802//identical protein binding	GO:0030029//actin filament-based process;GO:0048747//muscle fiber development
ENSMUST00000101617	339149.71875	125800.0234375	406301.46875	647541.5625	627481.6875	576541.9375	290417.0703125	617188.395833333	1.08758468166229	7.69729444232188e-05	0.0026995078184265	Flnc	filamin C, gamma [Source:MGI Symbol;Acc:MGI:95557]	Human Diseases;Environmental Information Processing;Cellular Processes;Human Diseases	Infectious diseases;Signal transduction;Cellular community - eukaryotes;Cancers	ko05132//Salmonella infection;ko04010//MAPK signaling pathway;ko04510//Focal adhesion;ko05205//Proteoglycans in cancer	K04437;K04437;K04437;K04437	GO:0005737//cytoplasm;GO:0005829//cytosol;GO:0005856//cytoskeleton;GO:0005886//plasma membrane;GO:0015629//actin cytoskeleton;GO:0016020//membrane;GO:0016528//sarcoplasm;GO:0030018//Z disc;GO:0042383//sarcolemma	GO:0003779//actin binding;GO:0005515//protein binding;GO:0008092//cytoskeletal protein binding;GO:0030506//ankyrin binding;GO:0042802//identical protein binding	GO:0030029//actin filament-based process;GO:0048747//muscle fiber development
ENSMUST00000030768	41121.1171875	48985.26953125	56789.1171875	108184.6640625	93208.390625	102426.484375	48965.16796875	101273.1796875	1.04842441519028	7.78039206144463e-05	0.00270624265588649	Kcnab2	potassium voltage-gated channel, shaker-related subfamily, beta member 2 [Source:MGI Symbol;Acc:MGI:109239]	-	-	-	-	GO:0005737//cytoplasm;GO:0016021//integral component of membrane	GO:0005249//voltage-gated potassium channel activity	GO:0006813//potassium ion transport;GO:0071805//potassium ion transmembrane transport
ENSMUST00000105648	41121.1171875	48985.26953125	56789.1171875	108184.6640625	93208.390625	102426.484375	48965.16796875	101273.1796875	1.04842441519028	7.78039206144463e-05	0.00270624265588649	Kcnab2	potassium voltage-gated channel, shaker-related subfamily, beta member 2 [Source:MGI Symbol;Acc:MGI:109239]	-	-	-	-	GO:0005737//cytoplasm;GO:0005829//cytosol;GO:0005856//cytoskeleton;GO:0005874//microtubule;GO:0005886//plasma membrane;GO:0008076//voltage-gated potassium channel complex;GO:0014069//postsynaptic density;GO:0016020//membrane;GO:0016021//integral component of membrane;GO:0030054//cell junction;GO:0030424//axon;GO:0031234//extrinsic component of cytoplasmic side of plasma membrane;GO:0034705//potas…	GO:0004033//aldo-keto reductase (NADP) activity;GO:0005244//voltage-gated ion channel activity;GO:0005249//voltage-gated potassium channel activity;GO:0005515//protein binding;GO:0015459//potassium channel regulator activity;GO:0016491//oxidoreductase activity;GO:0044325//ion channel binding;GO:0044877//protein-containing complex binding	GO:0002244//hematopoietic progenitor cell differentiation;GO:0006811//ion transport;GO:0006813//potassium ion transport;GO:0034220//ion transmembrane transport;GO:0034765//regulation of ion transmembrane transport;GO:0050905//neuromuscular process;GO:0055114//oxidation-reduction process;GO:0070995//NADPH oxidation;GO:0071805//potassium ion transmembrane transport;GO:1901379//regulation of potassi…
ENSMUST00000159186	41121.1171875	48985.26953125	56789.1171875	108184.6640625	93208.390625	102426.484375	48965.16796875	101273.1796875	1.04842441519028	7.78039206144463e-05	0.00270624265588649	Kcnab2	potassium voltage-gated channel, shaker-related subfamily, beta member 2 [Source:MGI Symbol;Acc:MGI:109239]	-	-	-	-	GO:0005737//cytoplasm;GO:0016021//integral component of membrane	GO:0005249//voltage-gated potassium channel activity	GO:0006813//potassium ion transport;GO:0055085//transmembrane transport;GO:0071805//potassium ion transmembrane transport
ENSMUST00000159840	41121.1171875	48985.26953125	56789.1171875	108184.6640625	93208.390625	102426.484375	48965.16796875	101273.1796875	1.04842441519028	7.78039206144463e-05	0.00270624265588649	Kcnab2	potassium voltage-gated channel, shaker-related subfamily, beta member 2 [Source:MGI Symbol;Acc:MGI:109239]	-	-	-	-	GO:0005737//cytoplasm;GO:0016021//integral component of membrane	GO:0005249//voltage-gated potassium channel activity	GO:0006813//potassium ion transport;GO:0071805//potassium ion transmembrane transport
ENSMUST00000160884	41121.1171875	48985.26953125	56789.1171875	108184.6640625	93208.390625	102426.484375	48965.16796875	101273.1796875	1.04842441519028	7.78039206144463e-05	0.00270624265588649	Kcnab2	potassium voltage-gated channel, shaker-related subfamily, beta member 2 [Source:MGI Symbol;Acc:MGI:109239]	-	-	-	-	GO:0005737//cytoplasm;GO:0005829//cytosol;GO:0005856//cytoskeleton;GO:0005874//microtubule;GO:0005886//plasma membrane;GO:0008076//voltage-gated potassium channel complex;GO:0014069//postsynaptic density;GO:0016020//membrane;GO:0016021//integral component of membrane;GO:0030054//cell junction;GO:0030424//axon;GO:0031234//extrinsic component of cytoplasmic side of plasma membrane;GO:0034705//potas…	GO:0004033//aldo-keto reductase (NADP) activity;GO:0005244//voltage-gated ion channel activity;GO:0005249//voltage-gated potassium channel activity;GO:0005515//protein binding;GO:0015459//potassium channel regulator activity;GO:0016491//oxidoreductase activity;GO:0044325//ion channel binding;GO:0044877//protein-containing complex binding	GO:0002244//hematopoietic progenitor cell differentiation;GO:0006811//ion transport;GO:0006813//potassium ion transport;GO:0034220//ion transmembrane transport;GO:0034765//regulation of ion transmembrane transport;GO:0050905//neuromuscular process;GO:0055114//oxidation-reduction process;GO:0070995//NADPH oxidation;GO:0071805//potassium ion transmembrane transport;GO:1901379//regulation of potassi…
ENSMUST00000238252	41121.1171875	48985.26953125	56789.1171875	108184.6640625	93208.390625	102426.484375	48965.16796875	101273.1796875	1.04842441519028	7.78039206144463e-05	0.00270624265588649	Kcnab2	potassium voltage-gated channel, shaker-related subfamily, beta member 2 [Source:MGI Symbol;Acc:MGI:109239]	-	-	-	-	GO:0005737//cytoplasm;GO:0016021//integral component of membrane	GO:0005249//voltage-gated potassium channel activity	GO:0006813//potassium ion transport;GO:0055085//transmembrane transport
ENSMUST00000028332	45812.328125	73435.15625	87006.09375	102549.0078125	119043.796875	108520.28125	68751.1927083333	110037.6953125	0.678541181524447	8.10510508892672e-05	0.00275618852940206	Dpp7	dipeptidylpeptidase 7 [Source:MGI Symbol;Acc:MGI:1933213]	-	-	-	-	GO:0005576//extracellular region;GO:0005764//lysosome;GO:0005794//Golgi apparatus;GO:0005829//cytosol;GO:0031410//cytoplasmic vesicle;GO:0031982//vesicle;GO:0043231//intracellular membrane-bounded organelle	GO:0004177//aminopeptidase activity;GO:0008233//peptidase activity;GO:0008236//serine-type peptidase activity;GO:0008239//dipeptidyl-peptidase activity;GO:0016787//hydrolase activity	GO:0006508//proteolysis
ENSMUST00000023387	23480.935546875	32231.78125	17266.283203125	34754.265625	90283.4453125	32180.671875	24326.3333333333	52406.1276041667	1.1072166275262	8.17101804910177e-05	0.00276316593693792	Qtrt2	queuine tRNA-ribosyltransferase accessory subunit 2 [Source:MGI Symbol;Acc:MGI:1922194]	-	-	-	-	GO:0005737//cytoplasm;GO:0005739//mitochondrion;GO:0005741//mitochondrial outer membrane;GO:0016020//membrane;GO:0032991//protein-containing complex	GO:0008479//queuine tRNA-ribosyltransferase activity;GO:0016763//transferase activity, transferring pentosyl groups;GO:0042803//protein homodimerization activity;GO:0046872//metal ion binding;GO:0046982//protein heterodimerization activity	GO:0006400//tRNA modification;GO:0008033//tRNA processing;GO:0101030//tRNA-guanine transglycosylation
ENSMUST00000239112	23480.935546875	32231.78125	17266.283203125	34754.265625	90283.4453125	32180.671875	24326.3333333333	52406.1276041667	1.1072166275262	8.17101804910177e-05	0.00276316593693792	Qtrt2	queuine tRNA-ribosyltransferase accessory subunit 2 [Source:MGI Symbol;Acc:MGI:1922194]	-	-	-	-	GO:0005737//cytoplasm;GO:0005739//mitochondrion;GO:0005741//mitochondrial outer membrane;GO:0016020//membrane	GO:0008479//queuine tRNA-ribosyltransferase activity;GO:0016763//transferase activity, transferring pentosyl groups;GO:0046872//metal ion binding	GO:0006400//tRNA modification;GO:0008033//tRNA processing;GO:0101030//tRNA-guanine transglycosylation
ENSMUST00000119185	407932.28125	28372.884765625	182484.609375	780562	17813.279296875	377545.09375	206263.258463542	391973.457682292	0.926269108354347	8.25207343705831e-05	0.00277515861941292	Mybpc1	myosin binding protein C, slow-type [Source:MGI Symbol;Acc:MGI:1336213]	-	-	-	-	GO:0005856//cytoskeleton	GO:0005200//structural constituent of cytoskeleton;GO:0005515//protein binding	GO:0006936//muscle contraction;GO:0007010//cytoskeleton organization
ENSMUST00000121629	407932.28125	28372.884765625	182484.609375	780562	17813.279296875	377545.09375	206263.258463542	391973.457682292	0.926269108354347	8.25207343705831e-05	0.00277515861941292	Mybpc1	myosin binding protein C, slow-type [Source:MGI Symbol;Acc:MGI:1336213]	-	-	-	-	GO:0005856//cytoskeleton	GO:0005200//structural constituent of cytoskeleton;GO:0005515//protein binding	GO:0006936//muscle contraction;GO:0007010//cytoskeleton organization
ENSMUST00000238199	407932.28125	28372.884765625	182484.609375	780562	17813.279296875	377545.09375	206263.258463542	391973.457682292	0.926269108354347	8.25207343705831e-05	0.00277515861941292	Mybpc1	myosin binding protein C, slow-type [Source:MGI Symbol;Acc:MGI:1336213]	-	-	-	-	GO:0005856//cytoskeleton	GO:0005200//structural constituent of cytoskeleton;GO:0005515//protein binding	GO:0006936//muscle contraction;GO:0007010//cytoskeleton organization
ENSMUST00000006697	142195.015625	49898.84375	157067.234375	173470.75	361846.6875	172111.03125	116387.03125	235809.489583333	1.0186914663853	8.46515452549526e-05	0.00281220959949427	Itih3	inter-alpha trypsin inhibitor, heavy chain 3 [Source:MGI Symbol;Acc:MGI:96620]	-	-	-	-	GO:0005576//extracellular region;GO:0062023//collagen-containing extracellular matrix	GO:0004867//serine-type endopeptidase inhibitor activity;GO:0030414//peptidase inhibitor activity	GO:0010466//negative regulation of peptidase activity;GO:0010951//negative regulation of endopeptidase activity;GO:0030212//hyaluronan metabolic process
ENSMUST00000027601	16407.771484375	11814.3955078125	39267.140625	45157.44921875	42568.4921875	22154.6484375	22496.4358723958	36626.86328125	0.703205701898999	8.50084715470586e-05	0.00281220959949427	Mcm6	minichromosome maintenance complex component 6 [Source:MGI Symbol;Acc:MGI:1298227]	Cellular Processes;Genetic Information Processing	Cell growth and death;Replication and repair	ko04110//Cell cycle;ko03030//DNA replication	K02542;K02542	GO:0005634//nucleus;GO:0005654//nucleoplasm;GO:0042555//MCM complex	GO:0000166//nucleotide binding;GO:0003677//DNA binding;GO:0003678//DNA helicase activity;GO:0003688//DNA replication origin binding;GO:0003697//single-stranded DNA binding;GO:0004386//helicase activity;GO:0005515//protein binding;GO:0005524//ATP binding;GO:0016787//hydrolase activity;GO:0042802//identical protein binding;GO:1990518//single-stranded DNA-dependent ATP-dependent 3'-5' DNA helicase a…	GO:0000727//double-strand break repair via break-induced replication;GO:0006260//DNA replication;GO:0006267//pre-replicative complex assembly involved in nuclear cell cycle DNA replication;GO:0006268//DNA unwinding involved in DNA replication;GO:0006270//DNA replication initiation;GO:0007049//cell cycle;GO:0032508//DNA duplex unwinding;GO:1902969//mitotic DNA replication
ENSMUST00000042792	2549338.5	2032910.5	1679248.875	1199177	1836495.75	964080.75	2087165.95833333	1333251.16666667	-0.646596728653347	9.78033948421239e-05	0.00320069496991402	Scn7a	sodium channel, voltage-gated, type VII, alpha [Source:MGI Symbol;Acc:MGI:102965]	Organismal Systems	Circulatory system	ko04261//Adrenergic signaling in cardiomyocytes	K04839	GO:0001518//voltage-gated sodium channel complex;GO:0005886//plasma membrane;GO:0016020//membrane;GO:0016021//integral component of membrane;GO:0030424//axon;GO:0097386//glial cell projection	GO:0005216//ion channel activity;GO:0005244//voltage-gated ion channel activity;GO:0005248//voltage-gated sodium channel activity;GO:0005261//cation channel activity;GO:0005272//sodium channel activity;GO:0005515//protein binding	GO:0006811//ion transport;GO:0006814//sodium ion transport;GO:0006936//muscle contraction;GO:0009617//response to bacterium;GO:0019228//neuronal action potential;GO:0034765//regulation of ion transmembrane transport;GO:0035725//sodium ion transmembrane transport;GO:0055078//sodium ion homeostasis;GO:0055085//transmembrane transport;GO:0086010//membrane depolarization during action potential
ENSMUST00000034026	275783.28125	203293.59375	269754.15625	131305.921875	171374.28125	154864.203125	249610.34375	152514.802083333	-0.710728452168012	9.94939278740894e-05	0.00322138052643395	Hpgd	hydroxyprostaglandin dehydrogenase 15 (NAD) [Source:MGI Symbol;Acc:MGI:108085]	Human Diseases	Cancers	ko05202//Transcriptional misregulation in cancers	K00069	GO:0005615//extracellular space;GO:0005654//nucleoplasm;GO:0005737//cytoplasm;GO:0005829//cytosol;GO:0016323//basolateral plasma membrane	GO:0004957//prostaglandin E receptor activity;GO:0016404//15-hydroxyprostaglandin dehydrogenase (NAD+) activity;GO:0016491//oxidoreductase activity;GO:0042802//identical protein binding;GO:0051287//NAD binding;GO:0070403//NAD+ binding	GO:0001822//kidney development;GO:0006629//lipid metabolic process;GO:0006631//fatty acid metabolic process;GO:0006693//prostaglandin metabolic process;GO:0007179//transforming growth factor beta receptor signaling pathway;GO:0007565//female pregnancy;GO:0007567//parturition;GO:0030728//ovulation;GO:0032355//response to estradiol;GO:0032496//response to lipopolysaccharide;GO:0043065//positive reg…
ENSMUST00000032473	349426.59375	98327.6953125	70596.1796875	392483.03125	397572.21875	506252.0625	172783.489583333	432102.4375	1.32240800261851	0.000100204968987371	0.00322723622341867	Iigp1	interferon inducible GTPase 1 [Source:MGI Symbol;Acc:MGI:1926259]	Environmental Information Processing	Signal transduction	ko04668//TNF signaling pathway	K17072	GO:0005634//nucleus;GO:0005737//cytoplasm;GO:0005783//endoplasmic reticulum;GO:0005789//endoplasmic reticulum membrane;GO:0005794//Golgi apparatus;GO:0016020//membrane;GO:0020005//symbiont-containing vacuole membrane;GO:0031965//nuclear membrane;GO:0032580//Golgi cisterna membrane	GO:0000166//nucleotide binding;GO:0003924//GTPase activity;GO:0005515//protein binding;GO:0005525//GTP binding;GO:0016787//hydrolase activity;GO:0019003//GDP binding;GO:0042802//identical protein binding	GO:0002376//immune system process;GO:0006952//defense response;GO:0009617//response to bacterium;GO:0010506//regulation of autophagy;GO:0019221//cytokine-mediated signaling pathway;GO:0035458//cellular response to interferon-beta;GO:0042832//defense response to protozoan;GO:0045087//innate immune response;GO:0050829//defense response to Gram-negative bacterium
ENSMUST00000066912	349426.59375	98327.6953125	70596.1796875	392483.03125	397572.21875	506252.0625	172783.489583333	432102.4375	1.32240800261851	0.000100204968987371	0.00322723622341867	Iigp1	interferon inducible GTPase 1 [Source:MGI Symbol;Acc:MGI:1926259]	Environmental Information Processing	Signal transduction	ko04668//TNF signaling pathway	K17072	GO:0005634//nucleus;GO:0005737//cytoplasm;GO:0005783//endoplasmic reticulum;GO:0005789//endoplasmic reticulum membrane;GO:0005794//Golgi apparatus;GO:0016020//membrane;GO:0020005//symbiont-containing vacuole membrane;GO:0031965//nuclear membrane;GO:0032580//Golgi cisterna membrane	GO:0000166//nucleotide binding;GO:0003924//GTPase activity;GO:0005515//protein binding;GO:0005525//GTP binding;GO:0016787//hydrolase activity;GO:0019003//GDP binding;GO:0042802//identical protein binding	GO:0002376//immune system process;GO:0006952//defense response;GO:0009617//response to bacterium;GO:0010506//regulation of autophagy;GO:0019221//cytokine-mediated signaling pathway;GO:0035458//cellular response to interferon-beta;GO:0042832//defense response to protozoan;GO:0045087//innate immune response;GO:0050829//defense response to Gram-negative bacterium
ENSMUST00000237185	349426.59375	98327.6953125	70596.1796875	392483.03125	397572.21875	506252.0625	172783.489583333	432102.4375	1.32240800261851	0.000100204968987371	0.00322723622341867	Iigp1	interferon inducible GTPase 1 [Source:MGI Symbol;Acc:MGI:1926259]	Environmental Information Processing	Signal transduction	ko04668//TNF signaling pathway	K17072	GO:0005634//nucleus;GO:0005737//cytoplasm;GO:0005783//endoplasmic reticulum;GO:0005789//endoplasmic reticulum membrane;GO:0005794//Golgi apparatus;GO:0016020//membrane;GO:0020005//symbiont-containing vacuole membrane;GO:0031965//nuclear membrane;GO:0032580//Golgi cisterna membrane	GO:0000166//nucleotide binding;GO:0003924//GTPase activity;GO:0005515//protein binding;GO:0005525//GTP binding;GO:0016787//hydrolase activity;GO:0019003//GDP binding;GO:0042802//identical protein binding	GO:0002376//immune system process;GO:0006952//defense response;GO:0009617//response to bacterium;GO:0010506//regulation of autophagy;GO:0019221//cytokine-mediated signaling pathway;GO:0035458//cellular response to interferon-beta;GO:0042832//defense response to protozoan;GO:0045087//innate immune response;GO:0050829//defense response to Gram-negative bacterium
ENSMUST00000079784	5766182	1500360.125	1523702	6852907	3014357.25	9998647	2930081.375	6621970.41666667	1.17631983346416	0.000105304461307328	0.00332118267345962	Myl3	myosin, light polypeptide 3 [Source:MGI Symbol;Acc:MGI:97268]	Environmental Information Processing;Human Diseases;Organismal Systems;Human Diseases;Organismal Systems	Signal transduction;Cardiovascular diseases;Circulatory system;Cardiovascular diseases;Circulatory system	ko04371//Apelin signaling pathway;ko05414//Dilated cardiomyopathy (DCM);ko04261//Adrenergic signaling in cardiomyocytes;ko05410//Hypertrophic cardiomyopathy (HCM);ko04260//Cardiac muscle contraction	K12749;K12749;K12749;K12749;K12749	GO:0016459//myosin complex;GO:0031672//A band;GO:0031674//I band	GO:0003774//motor activity;GO:0003785//actin monomer binding;GO:0005509//calcium ion binding	GO:0002026//regulation of the force of heart contraction;GO:0006942//regulation of striated muscle contraction;GO:0007519//skeletal muscle tissue development;GO:0055010//ventricular cardiac muscle tissue morphogenesis;GO:0060048//cardiac muscle contraction
ENSMUST00000036928	1792267.5	2294619	1439947.25	1268536.875	1018509.5625	1256831.375	1842277.91666667	1181292.60416667	-0.641124353369819	0.000108803051726179	0.00339632910696027	Ephx1	epoxide hydrolase 1, microsomal [Source:MGI Symbol;Acc:MGI:95405]	Human Diseases;Metabolism;Organismal Systems	Cancers;Xenobiotics biodegradation and metabolism;Digestive system	ko05204//Chemical carcinogenesis;ko00980//Metabolism of xenobiotics by cytochrome P450;ko04976//Bile secretion	K01253;K01253;K01253	GO:0005783//endoplasmic reticulum;GO:0005789//endoplasmic reticulum membrane;GO:0005886//plasma membrane;GO:0016020//membrane;GO:0016021//integral component of membrane;GO:0031090//organelle membrane;GO:0043231//intracellular membrane-bounded organelle	GO:0003824//catalytic activity;GO:0004301//epoxide hydrolase activity;GO:0016787//hydrolase activity;GO:0019899//enzyme binding;GO:0033961//cis-stilbene-oxide hydrolase activity	GO:0001889//liver development;GO:0006725//cellular aromatic compound metabolic process;GO:0009636//response to toxic substance;GO:0014070//response to organic cyclic compound;GO:0019369//arachidonic acid metabolic process;GO:0019439//aromatic compound catabolic process;GO:0034312//diol biosynthetic process;GO:0071310//cellular response to organic substance;GO:0071385//cellular response to glucoco…
ENSMUST00000000317	440286.65625	445015.59375	713228.875	1554669.75	1101194	1132200.75	532843.708333333	1262688.16666667	1.24471406091474	0.000109447489746714	0.0033990146433074	Ckmt1	creatine kinase, mitochondrial 1, ubiquitous [Source:MGI Symbol;Acc:MGI:99441]	Metabolism;Metabolism	Global and overview maps;Amino acid metabolism	ko01100//Metabolic pathways;ko00330//Arginine and proline metabolism	K00933;K00933	GO:0005739//mitochondrion;GO:0005743//mitochondrial inner membrane;GO:0016020//membrane;GO:0043204//perikaryon;GO:0043209//myelin sheath;GO:0044289//contact site	GO:0000166//nucleotide binding;GO:0003824//catalytic activity;GO:0004111//creatine kinase activity;GO:0005515//protein binding;GO:0005524//ATP binding;GO:0016301//kinase activity;GO:0016740//transferase activity;GO:0016772//transferase activity, transferring phosphorus-containing groups;GO:0042802//identical protein binding	GO:0016310//phosphorylation;GO:0032091//negative regulation of protein binding;GO:0043066//negative regulation of apoptotic process;GO:0046314//phosphocreatine biosynthetic process
ENSMUST00000078222	440286.65625	445015.59375	713228.875	1554669.75	1101194	1132200.75	532843.708333333	1262688.16666667	1.24471406091474	0.000109447489746714	0.0033990146433074	Ckmt1	creatine kinase, mitochondrial 1, ubiquitous [Source:MGI Symbol;Acc:MGI:99441]	Metabolism;Metabolism	Global and overview maps;Amino acid metabolism	ko01100//Metabolic pathways;ko00330//Arginine and proline metabolism	K00933;K00933	GO:0005739//mitochondrion;GO:0005743//mitochondrial inner membrane;GO:0016020//membrane;GO:0043204//perikaryon;GO:0043209//myelin sheath;GO:0044289//contact site	GO:0000166//nucleotide binding;GO:0003824//catalytic activity;GO:0004111//creatine kinase activity;GO:0005515//protein binding;GO:0005524//ATP binding;GO:0016301//kinase activity;GO:0016740//transferase activity;GO:0016772//transferase activity, transferring phosphorus-containing groups;GO:0042802//identical protein binding	GO:0016310//phosphorylation;GO:0032091//negative regulation of protein binding;GO:0043066//negative regulation of apoptotic process;GO:0046314//phosphocreatine biosynthetic process
ENSMUST00000009705	532565.25	563575.875	458930.5625	279015.28125	345223.5	398492.59375	518357.229166667	340910.458333333	-0.604553824428886	0.000118025662967093	0.00362441038256966	Eng	endoglin [Source:MGI Symbol;Acc:MGI:95392]	-	-	-	-	GO:0005615//extracellular space;GO:0005886//plasma membrane;GO:0009897//external side of plasma membrane;GO:0009986//cell surface;GO:0016020//membrane;GO:0016021//integral component of membrane;GO:0016604//nuclear body;GO:0043235//receptor complex;GO:0072563//endothelial microparticle	GO:0005024//transforming growth factor beta-activated receptor activity;GO:0005072//transforming growth factor beta receptor, cytoplasmic mediator activity;GO:0005114//type II transforming growth factor beta receptor binding;GO:0005515//protein binding;GO:0005534//galactose binding;GO:0005539//glycosaminoglycan binding;GO:0034713//type I transforming growth factor beta receptor binding;GO:0036122…	GO:0000122//negative regulation of transcription by RNA polymerase II;GO:0001300//chronological cell aging;GO:0001525//angiogenesis;GO:0001569//branching involved in blood vessel morphogenesis;GO:0001570//vasculogenesis;GO:0001666//response to hypoxia;GO:0001934//positive regulation of protein phosphorylation;GO:0001937//negative regulation of endothelial cell proliferation;GO:0001947//heart loop…
ENSMUST00000113272	532565.25	563575.875	458930.5625	279015.28125	345223.5	398492.59375	518357.229166667	340910.458333333	-0.604553824428886	0.000118025662967093	0.00362441038256966	Eng	endoglin [Source:MGI Symbol;Acc:MGI:95392]	-	-	-	-	GO:0016020//membrane;GO:0016021//integral component of membrane	-	-
ENSMUST00000167841	532565.25	563575.875	458930.5625	279015.28125	345223.5	398492.59375	518357.229166667	340910.458333333	-0.604553824428886	0.000118025662967093	0.00362441038256966	Eng	endoglin [Source:MGI Symbol;Acc:MGI:95392]	-	-	-	-	GO:0016020//membrane;GO:0016021//integral component of membrane	-	-
ENSMUST00000031565	202948.171875	193477.859375	181947.375	402494.875	269010.71875	283381.3125	192791.135416667	318295.635416667	0.723328656736511	0.000130249213518345	0.00390974655275144	Fscn1	fascin actin-bundling protein 1 [Source:MGI Symbol;Acc:MGI:1352745]	Human Diseases	Cancers	ko05206//MicroRNAs in cancer	K23551	GO:0001725//stress fiber;GO:0001726//ruffle;GO:0002102//podosome;GO:0005737//cytoplasm;GO:0005829//cytosol;GO:0005856//cytoskeleton;GO:0005886//plasma membrane;GO:0005902//microvillus;GO:0005911//cell-cell junction;GO:0005938//cell cortex;GO:0015629//actin cytoskeleton;GO:0030027//lamellipodium;GO:0030054//cell junction;GO:0030175//filopodium;GO:0030425//dendrite;GO:0030426//growth cone;GO:003125…	GO:0003779//actin binding;GO:0005515//protein binding;GO:0008144//drug binding;GO:0030674//protein binding, bridging;GO:0051015//actin filament binding	GO:0007015//actin filament organization;GO:0007043//cell-cell junction assembly;GO:0007163//establishment or maintenance of cell polarity;GO:0010592//positive regulation of lamellipodium assembly;GO:0016477//cell migration;GO:0030035//microspike assembly;GO:0030036//actin cytoskeleton organization;GO:0030046//parallel actin filament bundle assembly;GO:0032534//regulation of microvillus assembly;G…
ENSMUST00000049572	144482.78125	189253.875	162415.390625	298185.90625	358720.1875	219290.03125	165384.015625	292065.375	0.820471528912669	0.000130389116183431	0.00390974655275144	Lipa	lysosomal acid lipase A [Source:MGI Symbol;Acc:MGI:96789]	Cellular Processes;Organismal Systems;Metabolism	Transport and catabolism;Digestive system;Lipid metabolism	ko04142//Lysosome;ko04979//Cholesterol metabolism;ko00100//Steroid biosynthesis	K01052;K01052;K01052	GO:0001650//fibrillar center;GO:0005764//lysosome;GO:0043231//intracellular membrane-bounded organelle	GO:0004771//sterol esterase activity;GO:0016298//lipase activity;GO:0016787//hydrolase activity;GO:0016788//hydrolase activity, acting on ester bonds	GO:0000902//cell morphogenesis;GO:0001816//cytokine production;GO:0006629//lipid metabolic process;GO:0006631//fatty acid metabolic process;GO:0006954//inflammatory response;GO:0008283//cell proliferation;GO:0016042//lipid catabolic process;GO:0016125//sterol metabolic process;GO:0030324//lung development;GO:0048771//tissue remodeling;GO:0048873//homeostasis of number of cells within a tissue
ENSMUST00000178114	144482.78125	189253.875	162415.390625	298185.90625	358720.1875	219290.03125	165384.015625	292065.375	0.820471528912669	0.000130389116183431	0.00390974655275144	Lipa	lysosomal acid lipase A [Source:MGI Symbol;Acc:MGI:96789]	Cellular Processes;Organismal Systems;Metabolism	Transport and catabolism;Digestive system;Lipid metabolism	ko04142//Lysosome;ko04979//Cholesterol metabolism;ko00100//Steroid biosynthesis	K01052;K01052;K01052	GO:0001650//fibrillar center;GO:0005764//lysosome;GO:0043231//intracellular membrane-bounded organelle	GO:0004771//sterol esterase activity;GO:0016298//lipase activity;GO:0016787//hydrolase activity;GO:0016788//hydrolase activity, acting on ester bonds	GO:0000902//cell morphogenesis;GO:0001816//cytokine production;GO:0006629//lipid metabolic process;GO:0006631//fatty acid metabolic process;GO:0006954//inflammatory response;GO:0008283//cell proliferation;GO:0016042//lipid catabolic process;GO:0016125//sterol metabolic process;GO:0030324//lung development;GO:0048771//tissue remodeling;GO:0048873//homeostasis of number of cells within a tissue
ENSMUST00000043627	177728.90625	164884.3125	231830.359375	369953.09375	288915.25	286231.0625	191481.192708333	315033.135416667	0.718300882783222	0.000134018060682312	0.00399886242830017	Mrpl12	mitochondrial ribosomal protein L12 [Source:MGI Symbol;Acc:MGI:1926273]	Genetic Information Processing	Translation	ko03010//Ribosome	K02935	GO:0005739//mitochondrion;GO:0005761//mitochondrial ribosome;GO:0005762//mitochondrial large ribosomal subunit;GO:0005840//ribosome	GO:0003735//structural constituent of ribosome	GO:0006390//mitochondrial transcription;GO:0006412//translation;GO:0045893//positive regulation of transcription, DNA-templated
ENSMUST00000077136	63525.80078125	145205.046875	92901.2265625	655977.3125	439840.5	767911	100544.024739583	621242.9375	2.62733019987962	0.000138195939648383	0.00406376176154448	Sftpd	surfactant associated protein D [Source:MGI Symbol;Acc:MGI:109515]	Cellular Processes	Transport and catabolism	ko04145//Phagosome	K10068	GO:0005576//extracellular region;GO:0005581//collagen trimer;GO:0005615//extracellular space;GO:0005737//cytoplasm;GO:0005771//multivesicular body;GO:0005791//rough endoplasmic reticulum;GO:0031410//cytoplasmic vesicle;GO:0062023//collagen-containing extracellular matrix	GO:0001530//lipopolysaccharide binding;GO:0030246//carbohydrate binding;GO:0042802//identical protein binding;GO:0048029//monosaccharide binding	GO:0002376//immune system process;GO:0007585//respiratory gaseous exchange;GO:0008228//opsonization;GO:0032502//developmental process;GO:0032703//negative regulation of interleukin-2 production;GO:0042130//negative regulation of T cell proliferation;GO:0043129//surfactant homeostasis;GO:0043152//induction of bacterial agglutination;GO:0045087//innate immune response;GO:0048286//lung alveolus deve…
ENSMUST00000015484	115029.1796875	167343.984375	175141.640625	309793.4375	262334.65625	249299.03125	152504.934895833	273809.041666667	0.844314160273315	0.000148124782389826	0.00433478630003302	Cybb	cytochrome b-245, beta polypeptide [Source:MGI Symbol;Acc:MGI:88574]	Human Diseases;Cellular Processes;Organismal Systems;Cellular Processes;Organismal Systems;Human Diseases;Environmental Information Processing;Human Diseases;Cellular Processes	Neurodegenerative diseases;Transport and catabolism;Immune system;Cell growth and death;Immune system;Infectious diseases;Signal transduction;Endocrine and metabolic diseases;Cell growth and death	ko05010//Alzheimer disease;ko04145//Phagosome;ko04621//NOD-like receptor signaling pathway;ko04217//Necroptosis;ko04670//Leukocyte transendothelial migration;ko05140//Leishmaniasis;ko04066//HIF-1 signaling pathway;ko04933//AGE-RAGE signaling pathway in diabetic complications;ko04216//Ferroptosis	K21421;K21421;K21421;K21421;K21421;K21421;K21421;K21421;K21421	GO:0005635//nuclear envelope;GO:0005737//cytoplasm;GO:0005739//mitochondrion;GO:0005783//endoplasmic reticulum;GO:0005791//rough endoplasmic reticulum;GO:0005794//Golgi apparatus;GO:0005886//plasma membrane;GO:0005887//integral component of plasma membrane;GO:0016020//membrane;GO:0016021//integral component of membrane;GO:0030425//dendrite;GO:0043020//NADPH oxidase complex;GO:0043025//neuronal ce…	GO:0005244//voltage-gated ion channel activity;GO:0005515//protein binding;GO:0009055//electron transfer activity;GO:0016175//superoxide-generating NADPH oxidase activity;GO:0016491//oxidoreductase activity;GO:0020037//heme binding;GO:0046872//metal ion binding;GO:0046982//protein heterodimerization activity;GO:0050660//flavin adenine dinucleotide binding	GO:0006801//superoxide metabolic process;GO:0006811//ion transport;GO:0006952//defense response;GO:0006954//inflammatory response;GO:0007584//response to nutrient;GO:0022900//electron transport chain;GO:0034220//ion transmembrane transport;GO:0034765//regulation of ion transmembrane transport;GO:0042493//response to drug;GO:0042535//positive regulation of tumor necrosis factor biosynthetic proces…
ENSMUST00000028644	266701.96875	286204.65625	224047.953125	158430.859375	173324.125	171266.46875	258984.859375	167673.817708333	-0.627210328920293	0.000164771349434297	0.00470874743665055	Cd82	CD82 antigen [Source:MGI Symbol;Acc:MGI:104651]	Cellular Processes	Cell growth and death	ko04115//p53 signaling pathway	K06509	GO:0005886//plasma membrane;GO:0005887//integral component of plasma membrane;GO:0016020//membrane;GO:0016021//integral component of membrane	-	-
ENSMUST00000099696	266701.96875	286204.65625	224047.953125	158430.859375	173324.125	171266.46875	258984.859375	167673.817708333	-0.627210328920293	0.000164771349434297	0.00470874743665055	Cd82	CD82 antigen [Source:MGI Symbol;Acc:MGI:104651]	Cellular Processes	Cell growth and death	ko04115//p53 signaling pathway	K06509	GO:0005886//plasma membrane;GO:0005887//integral component of plasma membrane;GO:0016020//membrane;GO:0016021//integral component of membrane	-	-
ENSMUST00000111257	266701.96875	286204.65625	224047.953125	158430.859375	173324.125	171266.46875	258984.859375	167673.817708333	-0.627210328920293	0.000164771349434297	0.00470874743665055	Cd82	CD82 antigen [Source:MGI Symbol;Acc:MGI:104651]	Cellular Processes	Cell growth and death	ko04115//p53 signaling pathway	K06509	GO:0005886//plasma membrane;GO:0005887//integral component of plasma membrane;GO:0016020//membrane;GO:0016021//integral component of membrane	-	-
ENSMUST00000116457	266701.96875	286204.65625	224047.953125	158430.859375	173324.125	171266.46875	258984.859375	167673.817708333	-0.627210328920293	0.000164771349434297	0.00470874743665055	Cd82	CD82 antigen [Source:MGI Symbol;Acc:MGI:104651]	Cellular Processes	Cell growth and death	ko04115//p53 signaling pathway	K06509	GO:0005886//plasma membrane;GO:0005887//integral component of plasma membrane;GO:0016020//membrane;GO:0016021//integral component of membrane	-	-
ENSMUST00000041633	262182.84375	184698.671875	286347	534864.1875	531603.375	609675.75	244409.505208333	558714.4375	1.19281070745506	0.000177514626533933	0.00500482301043374	Tap1	transporter 1, ATP-binding cassette, sub-family B (MDR/TAP) [Source:MGI Symbol;Acc:MGI:98483]	Human Diseases;Human Diseases;Human Diseases;Human Diseases;Cellular Processes;Human Diseases;Organismal Systems;Environmental Information Processing	Infectious diseases;Infectious disease: viral;Infectious diseases;Infectious diseases;Transport and catabolism;Immune diseases;Immune system;Membrane transport	ko05169//Epstein-Barr virus infection;ko05170//Human immunodeficiency virus 1 infection;ko05163//Human cytomegalovirus infection;ko05168//Herpes simplex infection;ko04145//Phagosome;ko05340//Primary immunodeficiency;ko04612//Antigen processing and presentation;ko02010//ABC transporters	K05653;K05653;K05653;K05653;K05653;K05653;K05653;K05653	GO:0016020//membrane;GO:0016021//integral component of membrane;GO:0030176//integral component of endoplasmic reticulum membrane;GO:0042825//TAP complex	GO:0000166//nucleotide binding;GO:0005524//ATP binding;GO:0015433//peptide antigen-transporting ATPase activity;GO:0016887//ATPase activity;GO:0042287//MHC protein binding;GO:0042626//ATPase activity, coupled to transmembrane movement of substances;GO:0046979//TAP2 binding	GO:0002479//antigen processing and presentation of exogenous peptide antigen via MHC class I, TAP-dependent;GO:0015833//peptide transport;GO:0055085//transmembrane transport
ENSMUST00000170086	262182.84375	184698.671875	286347	534864.1875	531603.375	609675.75	244409.505208333	558714.4375	1.19281070745506	0.000177514626533933	0.00500482301043374	Tap1	transporter 1, ATP-binding cassette, sub-family B (MDR/TAP) [Source:MGI Symbol;Acc:MGI:98483]	Human Diseases;Human Diseases;Human Diseases;Human Diseases;Cellular Processes;Human Diseases;Organismal Systems;Environmental Information Processing	Infectious diseases;Infectious disease: viral;Infectious diseases;Infectious diseases;Transport and catabolism;Immune diseases;Immune system;Membrane transport	ko05169//Epstein-Barr virus infection;ko05170//Human immunodeficiency virus 1 infection;ko05163//Human cytomegalovirus infection;ko05168//Herpes simplex infection;ko04145//Phagosome;ko05340//Primary immunodeficiency;ko04612//Antigen processing and presentation;ko02010//ABC transporters	K05653;K05653;K05653;K05653;K05653;K05653;K05653;K05653	GO:0005739//mitochondrion;GO:0005783//endoplasmic reticulum;GO:0005789//endoplasmic reticulum membrane;GO:0016020//membrane;GO:0016021//integral component of membrane;GO:0030176//integral component of endoplasmic reticulum membrane;GO:0030670//phagocytic vesicle membrane;GO:0034451//centriolar satellite;GO:0042824//MHC class I peptide loading complex;GO:0042825//TAP complex;GO:0043231//intracellu…	GO:0000166//nucleotide binding;GO:0005524//ATP binding;GO:0015433//peptide antigen-transporting ATPase activity;GO:0015440//peptide-transporting ATPase activity;GO:0016887//ATPase activity;GO:0023029//MHC class Ib protein binding;GO:0042287//MHC protein binding;GO:0042288//MHC class I protein binding;GO:0042605//peptide antigen binding;GO:0042626//ATPase activity, coupled to transmembrane movemen…	GO:0002250//adaptive immune response;GO:0002376//immune system process;GO:0002479//antigen processing and presentation of exogenous peptide antigen via MHC class I, TAP-dependent;GO:0006952//defense response;GO:0015031//protein transport;GO:0015833//peptide transport;GO:0019885//antigen processing and presentation of endogenous peptide antigen via MHC class I;GO:0042270//protection from natural k…
ENSMUST00000022082	456769.78125	507220.34375	433466.625	813734	644040.25	690048.375	465818.916666667	715940.875	0.620071221565885	0.000177598450838457	0.00500482301043374	Glrx	glutaredoxin [Source:MGI Symbol;Acc:MGI:2135625]	-	-	-	-	GO:0005623//cell;GO:0005634//nucleus;GO:0005737//cytoplasm;GO:0005739//mitochondrion;GO:0005758//mitochondrial intermembrane space;GO:0005829//cytosol;GO:0030425//dendrite;GO:0043025//neuronal cell body	GO:0009055//electron transfer activity;GO:0015035//protein disulfide oxidoreductase activity;GO:0015038//glutathione disulfide oxidoreductase activity;GO:0019153//protein-disulfide reductase (glutathione) activity;GO:0047485//protein N-terminus binding	GO:0022900//electron transport chain;GO:0032024//positive regulation of insulin secretion;GO:0045454//cell redox homeostasis;GO:0045838//positive regulation of membrane potential;GO:0045921//positive regulation of exocytosis;GO:0055114//oxidation-reduction process;GO:0060355//positive regulation of cell adhesion molecule production;GO:0071392//cellular response to estradiol stimulus;GO:1901224//p…
ENSMUST00000223120	456769.78125	507220.34375	433466.625	813734	644040.25	690048.375	465818.916666667	715940.875	0.620071221565885	0.000177598450838457	0.00500482301043374	Glrx	glutaredoxin [Source:MGI Symbol;Acc:MGI:2135625]	-	-	-	-	GO:0005623//cell;GO:0005634//nucleus;GO:0005737//cytoplasm;GO:0005739//mitochondrion;GO:0005758//mitochondrial intermembrane space;GO:0005829//cytosol;GO:0030425//dendrite;GO:0043025//neuronal cell body	GO:0009055//electron transfer activity;GO:0015035//protein disulfide oxidoreductase activity;GO:0015038//glutathione disulfide oxidoreductase activity;GO:0019153//protein-disulfide reductase (glutathione) activity;GO:0047485//protein N-terminus binding	GO:0022900//electron transport chain;GO:0032024//positive regulation of insulin secretion;GO:0045454//cell redox homeostasis;GO:0045838//positive regulation of membrane potential;GO:0045921//positive regulation of exocytosis;GO:0055114//oxidation-reduction process;GO:0060355//positive regulation of cell adhesion molecule production;GO:0071392//cellular response to estradiol stimulus;GO:1901224//p…
ENSMUST00000031429	50710.578125	101463.0390625	116183.96875	235910.515625	178630.265625	180952.609375	89452.5286458333	198497.796875	1.14992882490177	0.00018133231374614	0.00506316419161814	P2rx4	purinergic receptor P2X, ligand-gated ion channel 4 [Source:MGI Symbol;Acc:MGI:1338859]	Environmental Information Processing;Environmental Information Processing	Signal transduction;Signaling molecules and interaction	ko04020//Calcium signaling pathway;ko04080//Neuroactive ligand-receptor interaction	K05218;K05218	GO:0005623//cell;GO:0005886//plasma membrane;GO:0005887//integral component of plasma membrane;GO:0014069//postsynaptic density;GO:0016020//membrane;GO:0016021//integral component of membrane;GO:0030054//cell junction;GO:0030424//axon;GO:0030425//dendrite;GO:0043025//neuronal cell body;GO:0043195//terminal bouton;GO:0043197//dendritic spine;GO:0044297//cell body;GO:0045202//synapse;GO:0048471//pe…	GO:0000166//nucleotide binding;GO:0001614//purinergic nucleotide receptor activity;GO:0004931//extracellularly ATP-gated cation channel activity;GO:0005102//signaling receptor binding;GO:0005216//ion channel activity;GO:0005507//copper ion binding;GO:0005524//ATP binding;GO:0008144//drug binding;GO:0008270//zinc ion binding;GO:0042802//identical protein binding;GO:0045296//cadherin binding;GO:009…	GO:0002028//regulation of sodium ion transport;GO:0002931//response to ischemia;GO:0006811//ion transport;GO:0007165//signal transduction;GO:0008217//regulation of blood pressure;GO:0010524//positive regulation of calcium ion transport into cytosol;GO:0010614//negative regulation of cardiac muscle hypertrophy;GO:0019228//neuronal action potential;GO:0019233//sensory perception of pain;GO:0019722/…
ENSMUST00000142664	50710.578125	101463.0390625	116183.96875	235910.515625	178630.265625	180952.609375	89452.5286458333	198497.796875	1.14992882490177	0.00018133231374614	0.00506316419161814	P2rx4	purinergic receptor P2X, ligand-gated ion channel 4 [Source:MGI Symbol;Acc:MGI:1338859]	Environmental Information Processing;Environmental Information Processing	Signal transduction;Signaling molecules and interaction	ko04020//Calcium signaling pathway;ko04080//Neuroactive ligand-receptor interaction	K05218;K05218	GO:0005887//integral component of plasma membrane;GO:0016020//membrane;GO:0016021//integral component of membrane;GO:0098794//postsynapse	GO:0000166//nucleotide binding;GO:0001614//purinergic nucleotide receptor activity;GO:0004931//extracellularly ATP-gated cation channel activity;GO:0005216//ion channel activity;GO:0005524//ATP binding	GO:0006811//ion transport;GO:0033198//response to ATP;GO:0035590//purinergic nucleotide receptor signaling pathway;GO:0060079//excitatory postsynaptic potential;GO:0098655//cation transmembrane transport
ENSMUST00000021347	60685.44921875	37081.33984375	65795.890625	95861.015625	73546.1015625	96905.4140625	54520.8932291667	88770.84375	0.703276711496894	0.000186404477123243	0.00510561113578367	Sel1l	sel-1 suppressor of lin-12-like (C. elegans) [Source:MGI Symbol;Acc:MGI:1329016]	Genetic Information Processing	Folding, sorting and degradation	ko04141//Protein processing in endoplasmic reticulum	K14026	GO:0000839//Hrd1p ubiquitin ligase ERAD-L complex;GO:0005783//endoplasmic reticulum;GO:0005789//endoplasmic reticulum membrane;GO:0016020//membrane;GO:0016021//integral component of membrane;GO:0036513//Derlin-1 retrotranslocation complex	GO:0005515//protein binding	GO:0006641//triglyceride metabolic process;GO:0007219//Notch signaling pathway;GO:0009306//protein secretion;GO:0030433//ubiquitin-dependent ERAD pathway;GO:0030970//retrograde protein transport, ER to cytosol;GO:0034976//response to endoplasmic reticulum stress;GO:0036503//ERAD pathway
ENSMUST00000167466	60685.44921875	37081.33984375	65795.890625	95861.015625	73546.1015625	96905.4140625	54520.8932291667	88770.84375	0.703276711496894	0.000186404477123243	0.00510561113578367	Sel1l	sel-1 suppressor of lin-12-like (C. elegans) [Source:MGI Symbol;Acc:MGI:1329016]	Genetic Information Processing	Folding, sorting and degradation	ko04141//Protein processing in endoplasmic reticulum	K14026	GO:0000839//Hrd1p ubiquitin ligase ERAD-L complex;GO:0005783//endoplasmic reticulum;GO:0005789//endoplasmic reticulum membrane;GO:0016020//membrane;GO:0016021//integral component of membrane;GO:0036513//Derlin-1 retrotranslocation complex	GO:0005515//protein binding	GO:0006641//triglyceride metabolic process;GO:0007219//Notch signaling pathway;GO:0009306//protein secretion;GO:0030433//ubiquitin-dependent ERAD pathway;GO:0030970//retrograde protein transport, ER to cytosol;GO:0034976//response to endoplasmic reticulum stress;GO:0036503//ERAD pathway
ENSMUST00000178462	60685.44921875	37081.33984375	65795.890625	95861.015625	73546.1015625	96905.4140625	54520.8932291667	88770.84375	0.703276711496894	0.000186404477123243	0.00510561113578367	Sel1l	sel-1 suppressor of lin-12-like (C. elegans) [Source:MGI Symbol;Acc:MGI:1329016]	Genetic Information Processing	Folding, sorting and degradation	ko04141//Protein processing in endoplasmic reticulum	K14026	-	GO:0005515//protein binding	-
ENSMUST00000057288	1769393.125	1584989.375	1987459.125	3536891.5	2876726.75	3027094.5	1780613.875	3146904.25	0.821558579972505	0.000188286505505979	0.00510561113578367	Pdia6	protein disulfide isomerase associated 6 [Source:MGI Symbol;Acc:MGI:1919103]	Genetic Information Processing	Folding, sorting and degradation	ko04141//Protein processing in endoplasmic reticulum	K09584	GO:0005623//cell	GO:0016853//isomerase activity	GO:0045454//cell redox homeostasis;GO:0055114//oxidation-reduction process
ENSMUST00000239402	1769393.125	1584989.375	1987459.125	3536891.5	2876726.75	3027094.5	1780613.875	3146904.25	0.821558579972505	0.000188286505505979	0.00510561113578367	Pdia6	protein disulfide isomerase associated 6 [Source:MGI Symbol;Acc:MGI:1919103]	Genetic Information Processing	Folding, sorting and degradation	ko04141//Protein processing in endoplasmic reticulum	K09584	GO:0005615//extracellular space;GO:0005783//endoplasmic reticulum;GO:0005793//endoplasmic reticulum-Golgi intermediate compartment;GO:0005829//cytosol	GO:0015037//peptide disulfide oxidoreductase activity;GO:0016853//isomerase activity	GO:0045454//cell redox homeostasis
ENSMUST00000120269	577795.6875	366017.125	681305.1875	906044.375	973621.875	682845.9375	541706	854170.729166667	0.65701439000724	0.00020542717474931	0.00546041577597839	Itih4	inter alpha-trypsin inhibitor, heavy chain 4 [Source:MGI Symbol;Acc:MGI:109536]	-	-	-	-	GO:0005576//extracellular region;GO:0005737//cytoplasm;GO:0005886//plasma membrane;GO:0062023//collagen-containing extracellular matrix	GO:0004867//serine-type endopeptidase inhibitor activity;GO:0005515//protein binding;GO:0030414//peptidase inhibitor activity	GO:0006953//acute-phase response;GO:0010466//negative regulation of peptidase activity;GO:0010951//negative regulation of endopeptidase activity;GO:0030212//hyaluronan metabolic process;GO:0034097//response to cytokine
ENSMUST00000041550	66991.6640625	21604.1953125	61209.18359375	148542.734375	121091.1484375	186348.21875	49935.0143229167	151994.033854167	1.6058910052711	0.000207175718462129	0.00548295042729992	Mgl2	macrophage galactose N-acetyl-galactosamine specific lectin 2 [Source:MGI Symbol;Acc:MGI:2385729]	-	-	-	-	GO:0016020//membrane;GO:0016021//integral component of membrane	GO:0030246//carbohydrate binding	-
ENSMUST00000165951	66991.6640625	21604.1953125	61209.18359375	148542.734375	121091.1484375	186348.21875	49935.0143229167	151994.033854167	1.6058910052711	0.000207175718462129	0.00548295042729992	Mgl2	macrophage galactose N-acetyl-galactosamine specific lectin 2 [Source:MGI Symbol;Acc:MGI:2385729]	-	-	-	-	GO:0016020//membrane;GO:0016021//integral component of membrane	GO:0030246//carbohydrate binding	-
ENSMUST00000020898	39993.35546875	9.88733863830566	160979.671875	435520.8125	456580.84375	307046	66994.3048941294	399715.885416667	2.5768645450391	0.000212101324030293	0.00556491706626033	Agr2	anterior gradient 2 [Source:MGI Symbol;Acc:MGI:1344405]	-	-	-	-	GO:0005576//extracellular region;GO:0005615//extracellular space;GO:0005739//mitochondrion;GO:0005783//endoplasmic reticulum	GO:0002162//dystroglycan binding;GO:0005154//epidermal growth factor receptor binding;GO:0042802//identical protein binding	GO:0010628//positive regulation of gene expression;GO:0010811//positive regulation of cell-substrate adhesion;GO:0045742//positive regulation of epidermal growth factor receptor signaling pathway;GO:0048546//digestive tract morphogenesis;GO:0048639//positive regulation of developmental growth;GO:0060480//lung goblet cell differentiation;GO:0060548//negative regulation of cell death;GO:0070254//mu…
ENSMUST00000087200	65133.56640625	68948.8359375	68686.5	58565.8125	74627.328125	221045.46875	67589.6341145833	118079.536458333	0.804885053337961	0.000232914229937353	0.00598206294358087	Gnl1	guanine nucleotide binding protein-like 1 [Source:MGI Symbol;Acc:MGI:95764]	-	-	-	-	-	GO:0000166//nucleotide binding;GO:0003924//GTPase activity;GO:0005525//GTP binding	GO:0006974//cellular response to DNA damage stimulus
ENSMUST00000016400	207282.0625	323779.53125	435468.5	841693.3125	844482.25	704547.1875	322176.697916667	796907.583333333	1.30656027387817	0.000238970205988767	0.00611181362963707	Ctsz	cathepsin Z [Source:MGI Symbol;Acc:MGI:1891190]	Cellular Processes;Cellular Processes	Cell growth and death;Transport and catabolism	ko04210//Apoptosis;ko04142//Lysosome	K08568;K08568	GO:0005615//extracellular space;GO:0005764//lysosome;GO:0005783//endoplasmic reticulum;GO:0009986//cell surface;GO:0030426//growth cone;GO:0031410//cytoplasmic vesicle;GO:0043231//intracellular membrane-bounded organelle;GO:0062023//collagen-containing extracellular matrix;GO:0099738//cell cortex region	GO:0004180//carboxypeptidase activity;GO:0004197//cysteine-type endopeptidase activity;GO:0008233//peptidase activity;GO:0008234//cysteine-type peptidase activity;GO:0016787//hydrolase activity	GO:0006508//proteolysis;GO:0010757//negative regulation of plasminogen activation;GO:0010977//negative regulation of neuron projection development;GO:0032091//negative regulation of protein binding;GO:0043525//positive regulation of neuron apoptotic process;GO:0051603//proteolysis involved in cellular protein catabolic process;GO:0060441//epithelial tube branching involved in lung morphogenesis;G…
ENSMUST00000067853	171806.59375	135656.796875	105919.8203125	67330.9375	78518.6640625	51348.390625	137794.403645833	65732.6640625	-1.06783493393721	0.000247208736784865	0.00626983158670614	Tmem119	transmembrane protein 119 [Source:MGI Symbol;Acc:MGI:2385228]	-	-	-	-	GO:0005737//cytoplasm;GO:0005783//endoplasmic reticulum;GO:0005789//endoplasmic reticulum membrane;GO:0005886//plasma membrane;GO:0016020//membrane;GO:0016021//integral component of membrane	GO:0005515//protein binding	GO:0001503//ossification;GO:0001649//osteoblast differentiation;GO:0001934//positive regulation of protein phosphorylation;GO:0001958//endochondral ossification;GO:0007283//spermatogenesis;GO:0010628//positive regulation of gene expression;GO:0010832//negative regulation of myotube differentiation;GO:0030154//cell differentiation;GO:0030501//positive regulation of bone mineralization;GO:0031214//…
ENSMUST00000103359	118406.765625	136863.640625	93135.953125	524815.6875	1246031.875	600718.3125	116135.453125	790521.958333333	2.76699708027804	0.000255255601429081	0.00642041671859014	Igkv4-55	immunoglobulin kappa variable 4-55 [Source:MGI Symbol;Acc:MGI:2686370]	-	-	-	-	-	-	-
ENSMUST00000182283	355092.8125	521077.03125	511493.5	804529.4375	580257.6875	757626.4375	462554.447916667	714137.854166667	0.626579395686862	0.000288640176763441	0.00717123573860843	Ptprc	protein tyrosine phosphatase, receptor type, C [Source:MGI Symbol;Acc:MGI:97810]	Human Diseases;Organismal Systems;Environmental Information Processing;Organismal Systems;Human Diseases	Infectious diseases;Immune system;Signaling molecules and interaction;Immune system;Immune diseases	ko05132//Salmonella infection;ko04666//Fc gamma R-mediated phagocytosis;ko04514//Cell adhesion molecules (CAMs);ko04660//T cell receptor signaling pathway;ko05340//Primary immunodeficiency	K06478;K06478;K06478;K06478;K06478	GO:0005623//cell;GO:0005886//plasma membrane;GO:0005887//integral component of plasma membrane;GO:0005925//focal adhesion;GO:0009897//external side of plasma membrane;GO:0009898//cytoplasmic side of plasma membrane;GO:0009986//cell surface;GO:0016020//membrane;GO:0016021//integral component of membrane;GO:0032059//bleb;GO:0045121//membrane raft;GO:0071944//cell periphery;GO:0098857//membrane micr…	GO:0004721//phosphoprotein phosphatase activity;GO:0004725//protein tyrosine phosphatase activity;GO:0005102//signaling receptor binding;GO:0005515//protein binding;GO:0008201//heparin binding;GO:0016787//hydrolase activity;GO:0016791//phosphatase activity;GO:0019901//protein kinase binding;GO:0030506//ankyrin binding;GO:0030507//spectrin binding;GO:0043395//heparan sulfate proteoglycan binding	GO:0000187//activation of MAPK activity;GO:0001779//natural killer cell differentiation;GO:0001915//negative regulation of T cell mediated cytotoxicity;GO:0001916//positive regulation of T cell mediated cytotoxicity;GO:0001960//negative regulation of cytokine-mediated signaling pathway;GO:0002244//hematopoietic progenitor cell differentiation;GO:0002378//immunoglobulin biosynthetic process;GO:000…
ENSMUST00000182755	355092.8125	521077.03125	511493.5	804529.4375	580257.6875	757626.4375	462554.447916667	714137.854166667	0.626579395686862	0.000288640176763441	0.00717123573860843	Ptprc	protein tyrosine phosphatase, receptor type, C [Source:MGI Symbol;Acc:MGI:97810]	Human Diseases;Organismal Systems;Environmental Information Processing;Organismal Systems;Human Diseases	Infectious diseases;Immune system;Signaling molecules and interaction;Immune system;Immune diseases	ko05132//Salmonella infection;ko04666//Fc gamma R-mediated phagocytosis;ko04514//Cell adhesion molecules (CAMs);ko04660//T cell receptor signaling pathway;ko05340//Primary immunodeficiency	K06478;K06478;K06478;K06478;K06478	GO:0016020//membrane;GO:0016021//integral component of membrane	GO:0004721//phosphoprotein phosphatase activity;GO:0004725//protein tyrosine phosphatase activity;GO:0005515//protein binding;GO:0016787//hydrolase activity;GO:0016791//phosphatase activity	GO:0006470//protein dephosphorylation;GO:0016311//dephosphorylation;GO:0035335//peptidyl-tyrosine dephosphorylation;GO:0050852//T cell receptor signaling pathway
ENSMUST00000183301	355092.8125	521077.03125	511493.5	804529.4375	580257.6875	757626.4375	462554.447916667	714137.854166667	0.626579395686862	0.000288640176763441	0.00717123573860843	Ptprc	protein tyrosine phosphatase, receptor type, C [Source:MGI Symbol;Acc:MGI:97810]	Human Diseases;Organismal Systems;Environmental Information Processing;Organismal Systems;Human Diseases	Infectious diseases;Immune system;Signaling molecules and interaction;Immune system;Immune diseases	ko05132//Salmonella infection;ko04666//Fc gamma R-mediated phagocytosis;ko04514//Cell adhesion molecules (CAMs);ko04660//T cell receptor signaling pathway;ko05340//Primary immunodeficiency	K06478;K06478;K06478;K06478;K06478	GO:0005623//cell;GO:0005886//plasma membrane;GO:0005887//integral component of plasma membrane;GO:0005925//focal adhesion;GO:0009897//external side of plasma membrane;GO:0009898//cytoplasmic side of plasma membrane;GO:0009986//cell surface;GO:0016020//membrane;GO:0016021//integral component of membrane;GO:0032059//bleb;GO:0045121//membrane raft;GO:0071944//cell periphery;GO:0098857//membrane micr…	GO:0004721//phosphoprotein phosphatase activity;GO:0004725//protein tyrosine phosphatase activity;GO:0005102//signaling receptor binding;GO:0005515//protein binding;GO:0008201//heparin binding;GO:0016787//hydrolase activity;GO:0016791//phosphatase activity;GO:0019901//protein kinase binding;GO:0030506//ankyrin binding;GO:0030507//spectrin binding;GO:0043395//heparan sulfate proteoglycan binding	GO:0000187//activation of MAPK activity;GO:0001779//natural killer cell differentiation;GO:0001915//negative regulation of T cell mediated cytotoxicity;GO:0001916//positive regulation of T cell mediated cytotoxicity;GO:0001960//negative regulation of cytokine-mediated signaling pathway;GO:0002244//hematopoietic progenitor cell differentiation;GO:0002378//immunoglobulin biosynthetic process;GO:000…
ENSMUST00000026613	104789.515625	102844.203125	147768.59375	275990.6875	204348.296875	244034.78125	118467.4375	241457.921875	1.02728122908873	0.000300380487025754	0.00740249402642009	Gusb	glucuronidase, beta [Source:MGI Symbol;Acc:MGI:95872]	Metabolism;Cellular Processes;Metabolism;Metabolism;Metabolism;Metabolism	Global and overview maps;Transport and catabolism;Xenobiotics biodegradation and metabolism;Metabolism of cofactors and vitamins;Carbohydrate metabolism;Glycan biosynthesis and metabolism	ko01100//Metabolic pathways;ko04142//Lysosome;ko00983//Drug metabolism - other enzymes;ko00860//Porphyrin and chlorophyll metabolism;ko00040//Pentose and glucuronate interconversions;ko00531//Glycosaminoglycan degradation	K01195;K01195;K01195;K01195;K01195;K01195	GO:0005615//extracellular space;GO:0005764//lysosome;GO:0005783//endoplasmic reticulum;GO:0043231//intracellular membrane-bounded organelle	GO:0004553//hydrolase activity, hydrolyzing O-glycosyl compounds;GO:0004566//beta-glucuronidase activity;GO:0005102//signaling receptor binding;GO:0016787//hydrolase activity;GO:0016798//hydrolase activity, acting on glycosyl bonds;GO:0019904//protein domain specific binding;GO:0030246//carbohydrate binding	GO:0005975//carbohydrate metabolic process;GO:0008152//metabolic process;GO:0019391//glucuronoside catabolic process
ENSMUST00000110689	116599.421875	82676.2890625	122003.921875	263607.25	180491.96875	343664.25	107093.2109375	262587.822916667	1.29393299030685	0.000317480279537576	0.0076686605616874	C7	complement component 7 [Source:MGI Symbol;Acc:MGI:88235]	Human Diseases;Organismal Systems;Human Diseases	Immune diseases;Immune system;Neurodegenerative diseases	ko05322//Systemic lupus erythematosus;ko04610//Complement and coagulation cascades;ko05020//Prion diseases	K03996;K03996;K03996	GO:0005579//membrane attack complex;GO:0005623//cell	GO:0005515//protein binding	GO:0006883//cellular sodium ion homeostasis;GO:0006955//immune response;GO:0006956//complement activation
ENSMUST00000028467	168715	309988.75	550710.5	3817407.75	941096	3743878.75	343138.083333333	2834127.5	3.04604350475348	0.000342545583750431	0.00805175545647934	Prg2	proteoglycan 2, bone marrow [Source:MGI Symbol;Acc:MGI:103294]	Human Diseases	Immune diseases	ko05310//Asthma	K10786	GO:0062023//collagen-containing extracellular matrix	GO:0030021//extracellular matrix structural constituent conferring compression resistance;GO:0030246//carbohydrate binding	GO:0002215//defense response to nematode;GO:0002376//immune system process;GO:0006955//immune response;GO:0032693//negative regulation of interleukin-10 production;GO:0032753//positive regulation of interleukin-4 production;GO:0042742//defense response to bacterium
ENSMUST00000025542	113286.0234375	121181.5859375	130841.796875	205925.84375	187228.703125	170430.34375	121769.802083333	187861.630208333	0.625514032641494	0.000342599747532142	0.00805175545647934	Psat1	phosphoserine aminotransferase 1 [Source:MGI Symbol;Acc:MGI:2183441]	Metabolism;Metabolism;Metabolism;Metabolism;Metabolism;Metabolism	Global and overview maps;Global and overview maps;Global and overview maps;Amino acid metabolism;Amino acid metabolism;Metabolism of cofactors and vitamins	ko01100//Metabolic pathways;ko01200//Carbon metabolism;ko01230//Biosynthesis of amino acids;ko00270//Cysteine and methionine metabolism;ko00260//Glycine, serine and threonine metabolism;ko00750//Vitamin B6 metabolism	K00831;K00831;K00831;K00831;K00831;K00831	GO:0005737//cytoplasm;GO:0005829//cytosol	GO:0003824//catalytic activity;GO:0004648//O-phospho-L-serine:2-oxoglutarate aminotransferase activity;GO:0008483//transaminase activity;GO:0016740//transferase activity	GO:0006564//L-serine biosynthetic process;GO:0008652//cellular amino acid biosynthetic process
ENSMUST00000081933	91603.9140625	47665.9765625	76216.7578125	144137.03125	123875.4453125	199643.359375	71828.8828125	155885.278645833	1.11784870861559	0.000388511061210522	0.00895782889995624	Dtx3l	deltex 3-like, E3 ubiquitin ligase [Source:MGI Symbol;Acc:MGI:2656973]	Environmental Information Processing	Signal transduction	ko04330//Notch signaling pathway	K06058	GO:0005634//nucleus;GO:0005654//nucleoplasm;GO:0005737//cytoplasm;GO:0005764//lysosome;GO:0005765//lysosomal membrane;GO:0005768//endosome;GO:0005769//early endosome;GO:0005829//cytosol;GO:0016020//membrane;GO:0031901//early endosome membrane;GO:0032991//protein-containing complex	GO:0004842//ubiquitin-protein transferase activity;GO:0004857//enzyme inhibitor activity;GO:0008047//enzyme activator activity;GO:0016740//transferase activity;GO:0019899//enzyme binding;GO:0042393//histone binding;GO:0044389//ubiquitin-like protein ligase binding;GO:0046872//metal ion binding;GO:0061630//ubiquitin protein ligase activity;GO:0097677//STAT family protein binding	GO:0002230//positive regulation of defense response to virus by host;GO:0002376//immune system process;GO:0006281//DNA repair;GO:0006302//double-strand break repair;GO:0006325//chromatin organization;GO:0006511//ubiquitin-dependent protein catabolic process;GO:0006974//cellular response to DNA damage stimulus;GO:0007219//Notch signaling pathway;GO:0008333//endosome to lysosome transport;GO:001039…
ENSMUST00000022682	1092915.375	1404158.125	1014916.4375	565690.9375	781796.6875	738973.125	1170663.3125	695486.916666667	-0.751230930068428	0.000402660668532209	0.00921953233189122	Sorbs3	sorbin and SH3 domain containing 3 [Source:MGI Symbol;Acc:MGI:700013]	-	-	-	-	GO:0005634//nucleus;GO:0005737//cytoplasm;GO:0005856//cytoskeleton;GO:0005925//focal adhesion;GO:0030054//cell junction	GO:0005515//protein binding;GO:0008134//transcription factor binding;GO:0017166//vinculin binding	GO:0000122//negative regulation of transcription by RNA polymerase II;GO:0007015//actin filament organization;GO:0007155//cell adhesion;GO:0031589//cell-substrate adhesion;GO:0043410//positive regulation of MAPK cascade;GO:0051496//positive regulation of stress fiber assembly
ENSMUST00000227259	1092915.375	1404158.125	1014916.4375	565690.9375	781796.6875	738973.125	1170663.3125	695486.916666667	-0.751230930068428	0.000402660668532209	0.00921953233189122	Sorbs3	sorbin and SH3 domain containing 3 [Source:MGI Symbol;Acc:MGI:700013]	-	-	-	-	-	GO:0005515//protein binding	GO:0007015//actin filament organization;GO:0007155//cell adhesion;GO:0043410//positive regulation of MAPK cascade
ENSMUST00000227653	1092915.375	1404158.125	1014916.4375	565690.9375	781796.6875	738973.125	1170663.3125	695486.916666667	-0.751230930068428	0.000402660668532209	0.00921953233189122	Sorbs3	sorbin and SH3 domain containing 3 [Source:MGI Symbol;Acc:MGI:700013]	-	-	-	-	-	GO:0005515//protein binding	GO:0007015//actin filament organization;GO:0007155//cell adhesion;GO:0043410//positive regulation of MAPK cascade
ENSMUST00000065678	541083.3125	581788.5625	641357.75	1080614.25	847529	867898.625	588076.541666667	932013.958333333	0.664347618963958	0.000402890685113039	0.00921953233189122	Sec61b	Sec61 beta subunit [Source:MGI Symbol;Acc:MGI:1913462]	Cellular Processes;Genetic Information Processing;Genetic Information Processing	Transport and catabolism;Folding, sorting and degradation;Folding, sorting and degradation	ko04145//Phagosome;ko04141//Protein processing in endoplasmic reticulum;ko03060//Protein export	K09481;K09481;K09481	GO:0005783//endoplasmic reticulum;GO:0005784//Sec61 translocon complex;GO:0005789//endoplasmic reticulum membrane;GO:0016020//membrane;GO:0016021//integral component of membrane;GO:0031205//endoplasmic reticulum Sec complex;GO:0044322//endoplasmic reticulum quality control compartment	GO:0005086//ARF guanyl-nucleotide exchange factor activity;GO:0005515//protein binding;GO:0043022//ribosome binding;GO:0048408//epidermal growth factor binding	GO:0006616//SRP-dependent cotranslational protein targeting to membrane, translocation;GO:0006886//intracellular protein transport;GO:0015031//protein transport;GO:0030433//ubiquitin-dependent ERAD pathway;GO:0030970//retrograde protein transport, ER to cytosol;GO:0031204//posttranslational protein targeting to membrane, translocation
ENSMUST00000055676	191918.28125	240013.5625	185417.28125	82824.625	120791.4921875	122138.078125	205783.041666667	108584.731770833	-0.922302838038976	0.000406296764772692	0.00926265321037969	S1pr1	sphingosine-1-phosphate receptor 1 [Source:MGI Symbol;Acc:MGI:1096355]	Environmental Information Processing;Environmental Information Processing;Environmental Information Processing	Signal transduction;Signal transduction;Signaling molecules and interaction	ko04071//Sphingolipid signaling pathway;ko04068//FoxO signaling pathway;ko04080//Neuroactive ligand-receptor interaction	K04288;K04288;K04288	GO:0005623//cell;GO:0005654//nucleoplasm;GO:0005768//endosome;GO:0005886//plasma membrane;GO:0005901//caveola;GO:0009897//external side of plasma membrane;GO:0016020//membrane;GO:0016021//integral component of membrane;GO:0031226//intrinsic component of plasma membrane;GO:0043231//intracellular membrane-bounded organelle	GO:0001664//G protein-coupled receptor binding;GO:0004930//G protein-coupled receptor activity;GO:0038036//sphingosine-1-phosphate receptor activity;GO:0046625//sphingolipid binding	GO:0001525//angiogenesis;GO:0001955//blood vessel maturation;GO:0003245//cardiac muscle tissue growth involved in heart morphogenesis;GO:0003376//sphingosine-1-phosphate receptor signaling pathway;GO:0006935//chemotaxis;GO:0007165//signal transduction;GO:0007186//G protein-coupled receptor signaling pathway;GO:0007193//adenylate cyclase-inhibiting G protein-coupled receptor signaling pathway;GO:0…
ENSMUST00000027817	1154822.875	1083600	1095859.25	525259.125	962310.1875	587313.25	1111427.375	691627.520833333	-0.68434649802036	0.000408386271200872	0.00926760608986424	Spta1	spectrin alpha, erythrocytic 1 [Source:MGI Symbol;Acc:MGI:98385]	Cellular Processes	Cell growth and death	ko04210//Apoptosis	K06114	GO:0005737//cytoplasm;GO:0005856//cytoskeleton;GO:0005938//cell cortex;GO:0008091//spectrin;GO:0009898//cytoplasmic side of plasma membrane;GO:0014731//spectrin-associated cytoskeleton;GO:0016020//membrane;GO:0030424//axon;GO:0030863//cortical cytoskeleton;GO:0032437//cuticular plate	GO:0003779//actin binding;GO:0005509//calcium ion binding;GO:0005515//protein binding;GO:0046872//metal ion binding	GO:0002260//lymphocyte homeostasis;GO:0006779//porphyrin-containing compound biosynthetic process;GO:0007009//plasma membrane organization;GO:0008360//regulation of cell shape;GO:0030036//actin cytoskeleton organization;GO:0030097//hemopoiesis;GO:0032092//positive regulation of protein binding;GO:0042102//positive regulation of T cell proliferation;GO:0051693//actin filament capping
ENSMUST00000022169	180503.1875	168503.625	222133.625	336785.34375	365095.25	320323.9375	190380.145833333	340734.84375	0.839766453630022	0.000409559066563739	0.00926760608986424	Hexb	hexosaminidase B [Source:MGI Symbol;Acc:MGI:96074]	Metabolism;Cellular Processes;Metabolism;Metabolism;Metabolism;Metabolism;Metabolism;Metabolism	Global and overview maps;Transport and catabolism;Carbohydrate metabolism;Glycan biosynthesis and metabolism;Glycan biosynthesis and metabolism;Glycan biosynthesis and metabolism;Glycan biosynthesis and metabolism;Glycan biosynthesis and metabolism	ko01100//Metabolic pathways;ko04142//Lysosome;ko00520//Amino sugar and nucleotide sugar metabolism;ko00513//Various types of N-glycan biosynthesis;ko00511//Other glycan degradation;ko00531//Glycosaminoglycan degradation;ko00604//Glycosphingolipid biosynthesis - ganglio series;ko00603//Glycosphingolipid biosynthesis - globo and isoglobo series	K12373;K12373;K12373;K12373;K12373;K12373;K12373;K12373	GO:0001669//acrosomal vesicle;GO:0005615//extracellular space;GO:0005623//cell;GO:0005764//lysosome;GO:0016020//membrane;GO:0042582//azurophil granule	GO:0004553//hydrolase activity, hydrolyzing O-glycosyl compounds;GO:0004563//beta-N-acetylhexosaminidase activity;GO:0008375//acetylglucosaminyltransferase activity;GO:0015929//hexosaminidase activity;GO:0016231//beta-N-acetylglucosaminidase activity;GO:0016787//hydrolase activity;GO:0016798//hydrolase activity, acting on glycosyl bonds;GO:0030246//carbohydrate binding;GO:0042802//identical prote…	GO:0001501//skeletal system development;GO:0005975//carbohydrate metabolic process;GO:0006044//N-acetylglucosamine metabolic process;GO:0006687//glycosphingolipid metabolic process;GO:0006689//ganglioside catabolic process;GO:0006874//cellular calcium ion homeostasis;GO:0007040//lysosome organization;GO:0007338//single fertilization;GO:0007341//penetration of zona pellucida;GO:0007605//sensory pe…
ENSMUST00000029671	32419.79296875	79717.1484375	75855.2265625	237219.4375	188449.953125	333908.78125	62664.0559895833	253192.723958333	2.0145258887647	0.000445215290398193	0.00981893287193406	Ifi44	interferon-induced protein 44 [Source:MGI Symbol;Acc:MGI:2443016]	-	-	-	-	GO:0005737//cytoplasm	GO:0003674//molecular_function	GO:0006955//immune response;GO:0009617//response to bacterium
ENSMUST00000155534	1.04272222518921	50698.19921875	18494.80078125	124762.5390625	156653.671875	146744.546875	23064.6809074084	142720.252604167	2.62943283541233	0.000480772897711292	0.0104144648696393	Muc5ac	mucin 5, subtypes A and C, tracheobronchial/gastric [Source:MGI Symbol;Acc:MGI:104697]	Organismal Systems	Immune system	ko04657//IL-17 signaling pathway	K21125	GO:0005576//extracellular region;GO:0005615//extracellular space;GO:0005737//cytoplasm;GO:0070701//mucus layer	GO:0005515//protein binding	GO:0036438//maintenance of lens transparency;GO:0048015//phosphatidylinositol-mediated signaling
ENSMUST00000151120	1314016.375	1533482.5	1638557	2912775.25	2134285	2061982.25	1495351.95833333	2369680.83333333	0.664207670090462	0.000542086143971478	0.0117009870863631	Ctsd	cathepsin D [Source:MGI Symbol;Acc:MGI:88562]	Human Diseases;Cellular Processes;Cellular Processes;Cellular Processes;Environmental Information Processing;Organismal Systems	Infectious diseases;Transport and catabolism;Cell growth and death;Transport and catabolism;Signal transduction;Endocrine system	ko05152//Tuberculosis;ko04140//Autophagy - animal;ko04210//Apoptosis;ko04142//Lysosome;ko04071//Sphingolipid signaling pathway;ko04915//Estrogen signaling pathway	K01379;K01379;K01379;K01379;K01379;K01379	GO:0005576//extracellular region;GO:0005615//extracellular space;GO:0005739//mitochondrion;GO:0005764//lysosome;GO:0005765//lysosomal membrane;GO:0010008//endosome membrane;GO:0042470//melanosome;GO:0045121//membrane raft;GO:0062023//collagen-containing extracellular matrix	GO:0004175//endopeptidase activity;GO:0004190//aspartic-type endopeptidase activity;GO:0005515//protein binding;GO:0008233//peptidase activity;GO:0016787//hydrolase activity;GO:0042277//peptide binding;GO:0070001//aspartic-type peptidase activity	GO:0000045//autophagosome assembly;GO:0006508//proteolysis;GO:0030163//protein catabolic process;GO:0042159//lipoprotein catabolic process;GO:0043065//positive regulation of apoptotic process;GO:0043280//positive regulation of cysteine-type endopeptidase activity involved in apoptotic process;GO:0070201//regulation of establishment of protein localization
ENSMUST00000188804	112872.890625	97509.3359375	98504.609375	131747.34375	138216.84375	238002.40625	102962.278645833	169322.197916667	0.717655233912673	0.000551333106298802	0.0118585322192255	Mndal	myeloid nuclear differentiation antigen like [Source:MGI Symbol;Acc:MGI:3780953]	Organismal Systems	Immune system	ko04621//NOD-like receptor signaling pathway	K20914	GO:0005634//nucleus;GO:0005654//nucleoplasm;GO:0005730//nucleolus;GO:0005829//cytosol	GO:0000978//RNA polymerase II proximal promoter sequence-specific DNA binding;GO:0001227//DNA-binding transcription repressor activity, RNA polymerase II-specific;GO:0003674//molecular_function;GO:0003690//double-stranded DNA binding;GO:0008134//transcription factor binding;GO:0042802//identical protein binding	GO:0000122//negative regulation of transcription by RNA polymerase II;GO:0002218//activation of innate immune response;GO:0009617//response to bacterium;GO:0030308//negative regulation of cell growth;GO:0032731//positive regulation of interleukin-1 beta production;GO:0035458//cellular response to interferon-beta;GO:0040008//regulation of growth
ENSMUST00000032910	884067.5	101743.3125	118438.4453125	953224.5	38158.93359375	2355324.5	368083.0859375	1115569.31119792	1.59967679014958	0.000561234359661955	0.0120289913635997	Mylpf	myosin light chain, phosphorylatable, fast skeletal muscle [Source:MGI Symbol;Acc:MGI:97273]	Cellular Processes;Cellular Processes;Organismal Systems	Cell motility;Cellular community - eukaryotes;Immune system	ko04810//Regulation of actin cytoskeleton;ko04510//Focal adhesion;ko04670//Leukocyte transendothelial migration	K12758;K12758;K12758	GO:0016459//myosin complex	GO:0005509//calcium ion binding;GO:0008307//structural constituent of muscle;GO:0046872//metal ion binding	GO:0006955//immune response;GO:0007519//skeletal muscle tissue development
ENSMUST00000115728	68666.796875	97502.375	114149.6328125	181064.09375	127296.6640625	162441.71875	93439.6015625	156934.158854167	0.748053381163008	0.000571910086919116	0.0121720863604079	Sting1	stimulator of interferon response cGAMP interactor 1 [Source:MGI Symbol;Acc:MGI:1919762]	Human Diseases;Human Diseases;Human Diseases;Organismal Systems;Organismal Systems;Organismal Systems	Infectious disease: viral;Infectious diseases;Infectious diseases;Immune system;Immune system;Immune system	ko05170//Human immunodeficiency virus 1 infection;ko05163//Human cytomegalovirus infection;ko05168//Herpes simplex infection;ko04621//NOD-like receptor signaling pathway;ko04622//RIG-I-like receptor signaling pathway;ko04623//Cytosolic DNA-sensing pathway	K12654;K12654;K12654;K12654;K12654;K12654	GO:0000421//autophagosome membrane;GO:0005654//nucleoplasm;GO:0005737//cytoplasm;GO:0005739//mitochondrion;GO:0005741//mitochondrial outer membrane;GO:0005768//endosome;GO:0005776//autophagosome;GO:0005777//peroxisome;GO:0005783//endoplasmic reticulum;GO:0005789//endoplasmic reticulum membrane;GO:0005794//Golgi apparatus;GO:0005829//cytosol;GO:0005886//plasma membrane;GO:0016020//membrane;GO:0016…	GO:0000166//nucleotide binding;GO:0005515//protein binding;GO:0008134//transcription factor binding;GO:0019901//protein kinase binding;GO:0031625//ubiquitin protein ligase binding;GO:0035438//cyclic-di-GMP binding;GO:0042802//identical protein binding;GO:0042803//protein homodimerization activity;GO:0061507//cyclic-GMP-AMP binding	GO:0000045//autophagosome assembly;GO:0002218//activation of innate immune response;GO:0002230//positive regulation of defense response to virus by host;GO:0002376//immune system process;GO:0006914//autophagy;GO:0010468//regulation of gene expression;GO:0016239//positive regulation of macroautophagy;GO:0031323//regulation of cellular metabolic process;GO:0032092//positive regulation of protein bi…
ENSMUST00000237919	68666.796875	97502.375	114149.6328125	181064.09375	127296.6640625	162441.71875	93439.6015625	156934.158854167	0.748053381163008	0.000571910086919116	0.0121720863604079	Sting1	stimulator of interferon response cGAMP interactor 1 [Source:MGI Symbol;Acc:MGI:1919762]	Human Diseases;Human Diseases;Human Diseases;Organismal Systems;Organismal Systems;Organismal Systems	Infectious disease: viral;Infectious diseases;Infectious diseases;Immune system;Immune system;Immune system	ko05170//Human immunodeficiency virus 1 infection;ko05163//Human cytomegalovirus infection;ko05168//Herpes simplex infection;ko04621//NOD-like receptor signaling pathway;ko04622//RIG-I-like receptor signaling pathway;ko04623//Cytosolic DNA-sensing pathway	K12654;K12654;K12654;K12654;K12654;K12654	GO:0000421//autophagosome membrane;GO:0005654//nucleoplasm;GO:0005737//cytoplasm;GO:0005739//mitochondrion;GO:0005741//mitochondrial outer membrane;GO:0005768//endosome;GO:0005776//autophagosome;GO:0005777//peroxisome;GO:0005783//endoplasmic reticulum;GO:0005789//endoplasmic reticulum membrane;GO:0005794//Golgi apparatus;GO:0005829//cytosol;GO:0005886//plasma membrane;GO:0016020//membrane;GO:0016…	GO:0000166//nucleotide binding;GO:0005515//protein binding;GO:0008134//transcription factor binding;GO:0019901//protein kinase binding;GO:0031625//ubiquitin protein ligase binding;GO:0035438//cyclic-di-GMP binding;GO:0042802//identical protein binding;GO:0042803//protein homodimerization activity;GO:0061507//cyclic-GMP-AMP binding	GO:0000045//autophagosome assembly;GO:0002218//activation of innate immune response;GO:0002230//positive regulation of defense response to virus by host;GO:0002376//immune system process;GO:0006914//autophagy;GO:0010468//regulation of gene expression;GO:0016239//positive regulation of macroautophagy;GO:0031323//regulation of cellular metabolic process;GO:0032092//positive regulation of protein bi…
ENSMUST00000021536	62720.02734375	59507.734375	36359.5703125	155013.953125	114278.9765625	63782.32421875	52862.4440104167	111025.084635417	1.07057063875662	0.000586096295978034	0.0124305510579035	Atp6v1d	ATPase, H+ transporting, lysosomal V1 subunit D [Source:MGI Symbol;Acc:MGI:1921084]	Metabolism;Human Diseases;Cellular Processes;Metabolism;Environmental Information Processing;Human Diseases;Organismal Systems;Organismal Systems	Global and overview maps;Infectious diseases;Transport and catabolism;Energy metabolism;Signal transduction;Immune diseases;Nervous system;Excretory system	ko01100//Metabolic pathways;ko05165//Human papillomavirus infection;ko04145//Phagosome;ko00190//Oxidative phosphorylation;ko04150//mTOR signaling pathway;ko05323//Rheumatoid arthritis;ko04721//Synaptic vesicle cycle;ko04966//Collecting duct acid secretion	K02149;K02149;K02149;K02149;K02149;K02149;K02149;K02149	GO:0005813//centrosome;GO:0005929//cilium;GO:0016020//membrane;GO:0033176//proton-transporting V-type ATPase complex	GO:0042626//ATPase activity, coupled to transmembrane movement of substances;GO:0046961//proton-transporting ATPase activity, rotational mechanism	GO:0006811//ion transport;GO:0030030//cell projection organization;GO:0055085//transmembrane transport;GO:0060271//cilium assembly;GO:0061512//protein localization to cilium;GO:1902600//proton transmembrane transport
ENSMUST00000031081	10488.052734375	5713.52197265625	5200.3427734375	522585.5625	1	10139.98046875	7133.97249348958	177575.514322917	4.63758320046287	0.000620433686619377	0.0129779376304198	Pi4k2b	phosphatidylinositol 4-kinase type 2 beta [Source:MGI Symbol;Acc:MGI:1914323]	Metabolism;Environmental Information Processing;Metabolism	Global and overview maps;Signal transduction;Carbohydrate metabolism	ko01100//Metabolic pathways;ko04070//Phosphatidylinositol signaling system;ko00562//Inositol phosphate metabolism	K13711;K13711;K13711	GO:0005737//cytoplasm;GO:0005768//endosome;GO:0005802//trans-Golgi network;GO:0005886//plasma membrane;GO:0016020//membrane	GO:0000166//nucleotide binding;GO:0004430//1-phosphatidylinositol 4-kinase activity;GO:0005524//ATP binding;GO:0016301//kinase activity;GO:0016740//transferase activity	GO:0007030//Golgi organization;GO:0007032//endosome organization;GO:0016310//phosphorylation;GO:0046854//phosphatidylinositol phosphorylation
ENSMUST00000014990	6934308	6908754	5113792.5	2809525	3113277	3969088.75	6318951.5	3297296.91666667	-0.938401387306328	0.00064102758717681	0.0132268980445602	Tppp3	tubulin polymerization-promoting protein family member 3 [Source:MGI Symbol;Acc:MGI:1915221]	-	-	-	-	GO:0005737//cytoplasm;GO:0005856//cytoskeleton;GO:0005874//microtubule;GO:0048471//perinuclear region of cytoplasm;GO:0097427//microtubule bundle	GO:0015631//tubulin binding	GO:0001578//microtubule bundle formation;GO:0007566//embryo implantation;GO:0032273//positive regulation of protein polymerization;GO:0046697//decidualization;GO:0046785//microtubule polymerization
ENSMUST00000176419	6934308	6908754	5113792.5	2809525	3113277	3969088.75	6318951.5	3297296.91666667	-0.938401387306328	0.00064102758717681	0.0132268980445602	Tppp3	tubulin polymerization-promoting protein family member 3 [Source:MGI Symbol;Acc:MGI:1915221]	-	-	-	-	GO:0005737//cytoplasm;GO:0005856//cytoskeleton;GO:0005874//microtubule;GO:0048471//perinuclear region of cytoplasm;GO:0097427//microtubule bundle	GO:0015631//tubulin binding	GO:0001578//microtubule bundle formation;GO:0007566//embryo implantation;GO:0032273//positive regulation of protein polymerization;GO:0046697//decidualization;GO:0046785//microtubule polymerization
ENSMUST00000177126	6934308	6908754	5113792.5	2809525	3113277	3969088.75	6318951.5	3297296.91666667	-0.938401387306328	0.00064102758717681	0.0132268980445602	Tppp3	tubulin polymerization-promoting protein family member 3 [Source:MGI Symbol;Acc:MGI:1915221]	-	-	-	-	GO:0005737//cytoplasm;GO:0005856//cytoskeleton;GO:0005874//microtubule;GO:0048471//perinuclear region of cytoplasm;GO:0097427//microtubule bundle	GO:0015631//tubulin binding	GO:0001578//microtubule bundle formation;GO:0007566//embryo implantation;GO:0032273//positive regulation of protein polymerization;GO:0046697//decidualization;GO:0046785//microtubule polymerization
ENSMUST00000105971	526440.375	13822.6943359375	44910.80078125	689426.375	47568.4765625	1505749.75	195057.956705729	747581.533854167	1.93832808400288	0.000653362058644379	0.0133869791623584	Tnni2	troponin I, skeletal, fast 2 [Source:MGI Symbol;Acc:MGI:105070]	-	-	-	-	GO:0005634//nucleus;GO:0005861//troponin complex	GO:0003779//actin binding;GO:0031014//troponin T binding;GO:0046872//metal ion binding	GO:0003009//skeletal muscle contraction;GO:0006936//muscle contraction;GO:0006937//regulation of muscle contraction;GO:0045893//positive regulation of transcription, DNA-templated;GO:0060048//cardiac muscle contraction
ENSMUST00000145287	526440.375	13822.6943359375	44910.80078125	689426.375	47568.4765625	1505749.75	195057.956705729	747581.533854167	1.93832808400288	0.000653362058644379	0.0133869791623584	Tnni2	troponin I, skeletal, fast 2 [Source:MGI Symbol;Acc:MGI:105070]	-	-	-	-	GO:0005861//troponin complex	-	-
ENSMUST00000149529	526440.375	13822.6943359375	44910.80078125	689426.375	47568.4765625	1505749.75	195057.956705729	747581.533854167	1.93832808400288	0.000653362058644379	0.0133869791623584	Tnni2	troponin I, skeletal, fast 2 [Source:MGI Symbol;Acc:MGI:105070]	-	-	-	-	GO:0005634//nucleus;GO:0005861//troponin complex	GO:0003779//actin binding;GO:0031014//troponin T binding;GO:0046872//metal ion binding	GO:0003009//skeletal muscle contraction;GO:0006936//muscle contraction;GO:0006937//regulation of muscle contraction;GO:0045893//positive regulation of transcription, DNA-templated;GO:0060048//cardiac muscle contraction
ENSMUST00000032419	111082.5390625	115811.5	63249.8203125	177982	155167.421875	182808.484375	96714.6197916667	171985.96875	0.830484974148874	0.000667929671494095	0.013426057904766	Cmas	cytidine monophospho-N-acetylneuraminic acid synthetase [Source:MGI Symbol;Acc:MGI:1337124]	Metabolism;Metabolism	Global and overview maps;Carbohydrate metabolism	ko01100//Metabolic pathways;ko00520//Amino sugar and nucleotide sugar metabolism	K21749;K21749	-	-	-
ENSMUST00000090461	19956.314453125	22638.060546875	28242.796875	34943.9921875	52994.609375	42495.72265625	23612.390625	43478.1080729167	0.880745049693908	0.000683453794198953	0.0136399450665214	Fyb	FYN binding protein [Source:MGI Symbol;Acc:MGI:1346327]	Environmental Information Processing;Human Diseases	Signal transduction;Infectious disease: bacterial	ko04015//Rap1 signaling pathway;ko05135//Yersinia infection	K17698;K17698	GO:0005634//nucleus;GO:0005737//cytoplasm;GO:0005829//cytosol;GO:0005886//plasma membrane;GO:0015629//actin cytoskeleton;GO:0030054//cell junction;GO:0032991//protein-containing complex	GO:0005515//protein binding;GO:0008289//lipid binding;GO:0044877//protein-containing complex binding	GO:0006955//immune response;GO:0007229//integrin-mediated signaling pathway;GO:0050852//T cell receptor signaling pathway;GO:0072659//protein localization to plasma membrane
ENSMUST00000098441	134869.53125	105295.921875	122794.296875	232522.984375	222917.359375	156439.40625	120986.583333333	203959.916666667	0.753438583248529	0.000690457707263572	0.0137346930199783	Col6a6	collagen, type VI, alpha 6 [Source:MGI Symbol;Acc:MGI:2444259]	Environmental Information Processing;Human Diseases;Cellular Processes;Environmental Information Processing;Organismal Systems	Signal transduction;Infectious diseases;Cellular community - eukaryotes;Signaling molecules and interaction;Digestive system	ko04151//PI3K-Akt signaling pathway;ko05165//Human papillomavirus infection;ko04510//Focal adhesion;ko04512//ECM-receptor interaction;ko04974//Protein digestion and absorption	K06238;K06238;K06238;K06238;K06238	GO:0005576//extracellular region;GO:0005581//collagen trimer;GO:0031012//extracellular matrix;GO:0062023//collagen-containing extracellular matrix	GO:0030020//extracellular matrix structural constituent conferring tensile strength	GO:0007155//cell adhesion
ENSMUST00000166431	134869.53125	105295.921875	122794.296875	232522.984375	222917.359375	156439.40625	120986.583333333	203959.916666667	0.753438583248529	0.000690457707263572	0.0137346930199783	Col6a6	collagen, type VI, alpha 6 [Source:MGI Symbol;Acc:MGI:2444259]	Environmental Information Processing;Human Diseases;Cellular Processes;Environmental Information Processing;Organismal Systems	Signal transduction;Infectious diseases;Cellular community - eukaryotes;Signaling molecules and interaction;Digestive system	ko04151//PI3K-Akt signaling pathway;ko05165//Human papillomavirus infection;ko04510//Focal adhesion;ko04512//ECM-receptor interaction;ko04974//Protein digestion and absorption	K06238;K06238;K06238;K06238;K06238	-	-	-
ENSMUST00000035266	211894.421875	77711.03125	86894.890625	172192.078125	183821.453125	251673.5	125500.114583333	202562.34375	0.690677321318446	0.000696915002300797	0.01380012469695	Igtp	interferon gamma induced GTPase [Source:MGI Symbol;Acc:MGI:107729]	Human Diseases	Infectious diseases	ko05145//Toxoplasmosis	K14140	GO:0005789//endoplasmic reticulum membrane;GO:0005829//cytosol;GO:0016020//membrane	GO:0003924//GTPase activity;GO:0005525//GTP binding	GO:0006952//defense response;GO:0035458//cellular response to interferon-beta
ENSMUST00000033056	241991.390625	194236.0625	216822.984375	432481.65625	394059	398547.0625	217683.479166667	408362.572916667	0.90761872693921	0.000759969759258972	0.0147417302639294	Pycard	PYD and CARD domain containing [Source:MGI Symbol;Acc:MGI:1931465]	Human Diseases;Organismal Systems;Human Diseases;Human Diseases;Cellular Processes;Organismal Systems;Human Diseases;Human Diseases;Organismal Systems	Infectious diseases;Immune system;Infectious disease: bacterial;Infectious diseases;Cell growth and death;Immune system;Infectious diseases;Infectious diseases;Immune system	ko05132//Salmonella infection;ko04621//NOD-like receptor signaling pathway;ko05135//Yersinia infection;ko05164//Influenza A;ko04217//Necroptosis;ko04625//C-type lectin receptor signaling pathway;ko05133//Pertussis;ko05134//Legionellosis;ko04623//Cytosolic DNA-sensing pathway	K12799;K12799;K12799;K12799;K12799;K12799;K12799;K12799;K12799	GO:0000139//Golgi membrane;GO:0005576//extracellular region;GO:0005634//nucleus;GO:0005654//nucleoplasm;GO:0005730//nucleolus;GO:0005737//cytoplasm;GO:0005739//mitochondrion;GO:0005783//endoplasmic reticulum;GO:0005829//cytosol;GO:0008385//IkappaB kinase complex;GO:0032991//protein-containing complex;GO:0043025//neuronal cell body;GO:0072558//NLRP1 inflammasome complex;GO:0072559//NLRP3 inflammas…	GO:0002020//protease binding;GO:0004197//cysteine-type endopeptidase activity;GO:0005138//interleukin-6 receptor binding;GO:0005515//protein binding;GO:0005523//tropomyosin binding;GO:0016505//peptidase activator activity involved in apoptotic process;GO:0017024//myosin I binding;GO:0019899//enzyme binding;GO:0032090//Pyrin domain binding;GO:0042802//identical protein binding;GO:0042803//protein …	GO:0001773//myeloid dendritic cell activation;GO:0002218//activation of innate immune response;GO:0002230//positive regulation of defense response to virus by host;GO:0002277//myeloid dendritic cell activation involved in immune response;GO:0002376//immune system process;GO:0002588//positive regulation of antigen processing and presentation of peptide antigen via MHC class II;GO:0002821//positive…
ENSMUST00000007272	113898.171875	1.08084511756897	59092.3671875	235329.3125	6732.876953125	451768.3125	57663.8733025392	231276.833984375	2.0038811130614	0.000760457253634603	0.0147417302639294	Krt14	keratin 14 [Source:MGI Symbol;Acc:MGI:96688]	Human Diseases;Organismal Systems	Infectious diseases;Endocrine system	ko05150//Staphylococcus aureus infection;ko04915//Estrogen signaling pathway	K07604;K07604	GO:0005634//nucleus;GO:0005737//cytoplasm;GO:0005882//intermediate filament;GO:0045095//keratin filament;GO:0045178//basal part of cell;GO:0071944//cell periphery	GO:0005198//structural molecule activity;GO:0005515//protein binding;GO:1990254//keratin filament binding	GO:0007568//aging;GO:0010043//response to zinc ion;GO:0010212//response to ionizing radiation;GO:0030855//epithelial cell differentiation;GO:0042633//hair cycle;GO:0045110//intermediate filament bundle assembly
ENSMUST00000103384	43245.7265625	66465.7109375	69945.7421875	185428.359375	146746.703125	263921.90625	59885.7265625	198698.989583333	1.73030044569202	0.000785030296211734	0.0149466463065594	Igkv8-24	immunoglobulin kappa chain variable 8-24 [Source:MGI Symbol;Acc:MGI:4947958]	-	-	-	-	GO:0005615//extracellular space	-	GO:0002377//immunoglobulin production;GO:0006955//immune response
ENSMUST00000023453	94781.0859375	130941.9375	231369.671875	491143.875	365352.5625	455809.40625	152364.231770833	437435.28125	1.52154532229638	0.00082106748720667	0.0155695881452555	Sdf2l1	stromal cell-derived factor 2-like 1 [Source:MGI Symbol;Acc:MGI:2149842]	-	-	-	-	GO:0005783//endoplasmic reticulum;GO:0005788//endoplasmic reticulum lumen;GO:0005789//endoplasmic reticulum membrane;GO:0016020//membrane;GO:0034663//endoplasmic reticulum chaperone complex	GO:0004169//dolichyl-phosphate-mannose-protein mannosyltransferase activity;GO:0051087//chaperone binding;GO:0051117//ATPase binding;GO:0051787//misfolded protein binding	GO:0034976//response to endoplasmic reticulum stress;GO:0035269//protein O-linked mannosylation;GO:0042981//regulation of apoptotic process;GO:0071218//cellular response to misfolded protein;GO:0071712//ER-associated misfolded protein catabolic process
ENSMUST00000031322	94213.2421875	152594.140625	119098.1953125	384636.625	199842.296875	292279.125	121968.526041667	292252.682291667	1.26070735726247	0.000853359397390542	0.0159484352888072	Cxcl15	chemokine (C-X-C motif) ligand 15 [Source:MGI Symbol;Acc:MGI:1339941]	Organismal Systems;Environmental Information Processing	Immune system;Signaling molecules and interaction	ko04062//Chemokine signaling pathway;ko04060//Cytokine-cytokine receptor interaction	K10034;K10034	GO:0005576//extracellular region;GO:0005615//extracellular space	GO:0005125//cytokine activity;GO:0008009//chemokine activity;GO:0045236//CXCR chemokine receptor binding	GO:0006935//chemotaxis;GO:0006952//defense response;GO:0006954//inflammatory response;GO:0006955//immune response;GO:0030097//hemopoiesis;GO:0030593//neutrophil chemotaxis;GO:0030595//leukocyte chemotaxis;GO:0061844//antimicrobial humoral immune response mediated by antimicrobial peptide;GO:0070098//chemokine-mediated signaling pathway;GO:0071222//cellular response to lipopolysaccharide
ENSMUST00000024042	54596.87109375	63290.0078125	106896.734375	403914.375	322442.625	459583.78125	74927.87109375	395313.59375	2.39942320008986	0.000867701067492848	0.0161519767517705	Creld2	cysteine-rich with EGF-like domains 2 [Source:MGI Symbol;Acc:MGI:1923987]	-	-	-	-	GO:0005615//extracellular space;GO:0005783//endoplasmic reticulum;GO:0005794//Golgi apparatus	GO:0003756//protein disulfide isomerase activity;GO:0005201//extracellular matrix structural constituent;GO:0005509//calcium ion binding;GO:0016853//isomerase activity	GO:0008150//biological_process
ENSMUST00000069036	381242.84375	231500.65625	437153.6875	711417.125	688820.5625	835587.5	349965.729166667	745275.0625	1.09055933548471	0.000905195172802498	0.0166967364146934	Manf	mesencephalic astrocyte-derived neurotrophic factor [Source:MGI Symbol;Acc:MGI:1922090]	-	-	-	-	GO:0005575//cellular_component	GO:0003674//molecular_function	-
ENSMUST00000159283	381242.84375	231500.65625	437153.6875	711417.125	688820.5625	835587.5	349965.729166667	745275.0625	1.09055933548471	0.000905195172802498	0.0166967364146934	Manf	mesencephalic astrocyte-derived neurotrophic factor [Source:MGI Symbol;Acc:MGI:1922090]	-	-	-	-	GO:0005615//extracellular space;GO:0005783//endoplasmic reticulum;GO:0048471//perinuclear region of cytoplasm	-	-
ENSMUST00000103380	63692.85546875	7361.2392578125	96242.359375	733887.25	129219.4296875	2111461.75	55765.4847005208	991522.809895833	4.15220159528378	0.000928041452835718	0.0170664299800937	Igkv8-28	immunoglobulin kappa variable 8-28 [Source:MGI Symbol;Acc:MGI:3642251]	-	-	-	-	GO:0005615//extracellular space	-	GO:0002377//immunoglobulin production;GO:0006955//immune response
ENSMUST00000101197	116528.171875	37592.57421875	103954.65625	228810.40625	131793.453125	202338.125	86025.1341145833	187647.328125	1.1251936068462	0.000941957397972147	0.0172183023467161	Arhgap25	Rho GTPase activating protein 25 [Source:MGI Symbol;Acc:MGI:2443687]	-	-	-	-	GO:0001891//phagocytic cup	GO:0003674//molecular_function;GO:0005096//GTPase activator activity	GO:0006911//phagocytosis, engulfment;GO:0007015//actin filament organization;GO:0007165//signal transduction;GO:0043547//positive regulation of GTPase activity;GO:0051058//negative regulation of small GTPase mediated signal transduction
ENSMUST00000113637	116528.171875	37592.57421875	103954.65625	228810.40625	131793.453125	202338.125	86025.1341145833	187647.328125	1.1251936068462	0.000941957397972147	0.0172183023467161	Arhgap25	Rho GTPase activating protein 25 [Source:MGI Symbol;Acc:MGI:2443687]	-	-	-	-	GO:0001891//phagocytic cup	GO:0003674//molecular_function;GO:0005096//GTPase activator activity	GO:0006911//phagocytosis, engulfment;GO:0007015//actin filament organization;GO:0007165//signal transduction;GO:0043547//positive regulation of GTPase activity;GO:0051058//negative regulation of small GTPase mediated signal transduction
ENSMUST00000004560	54099.1484375	24731.373046875	62466.30859375	106142.1171875	116642.359375	110945.453125	47098.943359375	111243.309895833	1.2399519767055	0.000999222723105847	0.0180152679693377	Bid	BH3 interacting domain death agonist [Source:MGI Symbol;Acc:MGI:108093]	Human Diseases;Human Diseases;Human Diseases;Human Diseases;Human Diseases;Human Diseases;Human Diseases;Human Diseases;Human Diseases;Human Diseases;Cellular Processes;Human Diseases;Human Diseases;Human Diseases;Cellular Processes;Organismal Systems;Human Diseases;Environmental Information Processing;Human Diseases;Human Diseases;Cellular Processes;Cellular Processes	Cancers;Neurodegenerative diseases;Infectious diseases;Infectious disease: viral;Infectious diseases;Infectious diseases;Infectious diseases;Infectious diseases;Infectious diseases;Infectious diseases;Cell growth and death;Endocrine and metabolic diseases;Infectious diseases;Infectious diseases;Cell growth and death;Immune system;Cardiovascular diseases;Signal transduction;Drug resistance;Neurode…	ko05200//Pathways in cancer;ko05010//Alzheimer disease;ko05169//Epstein-Barr virus infection;ko05170//Human immunodeficiency virus 1 infection;ko05163//Human cytomegalovirus infection;ko05152//Tuberculosis;ko05168//Herpes simplex infection;ko05167//Kaposi sarcoma-associated herpesvirus infection;ko05161//Hepatitis B;ko05164//Influenza A;ko04210//Apoptosis;ko04932//Non-alcoholic fatty liver diseas…	K04726;K04726;K04726;K04726;K04726;K04726;K04726;K04726;K04726;K04726;K04726;K04726;K04726;K04726;K04726;K04726;K04726;K04726;K04726;K04726;K04726;K04726	GO:0005737//cytoplasm;GO:0005739//mitochondrion;GO:0005741//mitochondrial outer membrane;GO:0005829//cytosol;GO:0016020//membrane;GO:0031966//mitochondrial membrane;GO:0032592//integral component of mitochondrial membrane	GO:0005515//protein binding;GO:0031625//ubiquitin protein ligase binding	GO:0001836//release of cytochrome c from mitochondria;GO:0002931//response to ischemia;GO:0006626//protein targeting to mitochondrion;GO:0006915//apoptotic process;GO:0006919//activation of cysteine-type endopeptidase activity involved in apoptotic process;GO:0007420//brain development;GO:0008637//apoptotic mitochondrial changes;GO:0010918//positive regulation of mitochondrial membrane potential;…
ENSMUST00000160684	54099.1484375	24731.373046875	62466.30859375	106142.1171875	116642.359375	110945.453125	47098.943359375	111243.309895833	1.2399519767055	0.000999222723105847	0.0180152679693377	Bid	BH3 interacting domain death agonist [Source:MGI Symbol;Acc:MGI:108093]	Human Diseases;Human Diseases;Human Diseases;Human Diseases;Human Diseases;Human Diseases;Human Diseases;Human Diseases;Human Diseases;Human Diseases;Cellular Processes;Human Diseases;Human Diseases;Human Diseases;Cellular Processes;Organismal Systems;Human Diseases;Environmental Information Processing;Human Diseases;Human Diseases;Cellular Processes;Cellular Processes	Cancers;Neurodegenerative diseases;Infectious diseases;Infectious disease: viral;Infectious diseases;Infectious diseases;Infectious diseases;Infectious diseases;Infectious diseases;Infectious diseases;Cell growth and death;Endocrine and metabolic diseases;Infectious diseases;Infectious diseases;Cell growth and death;Immune system;Cardiovascular diseases;Signal transduction;Drug resistance;Neurode…	ko05200//Pathways in cancer;ko05010//Alzheimer disease;ko05169//Epstein-Barr virus infection;ko05170//Human immunodeficiency virus 1 infection;ko05163//Human cytomegalovirus infection;ko05152//Tuberculosis;ko05168//Herpes simplex infection;ko05167//Kaposi sarcoma-associated herpesvirus infection;ko05161//Hepatitis B;ko05164//Influenza A;ko04210//Apoptosis;ko04932//Non-alcoholic fatty liver diseas…	K04726;K04726;K04726;K04726;K04726;K04726;K04726;K04726;K04726;K04726;K04726;K04726;K04726;K04726;K04726;K04726;K04726;K04726;K04726;K04726;K04726;K04726	GO:0005737//cytoplasm;GO:0005739//mitochondrion;GO:0005741//mitochondrial outer membrane;GO:0005829//cytosol;GO:0016020//membrane;GO:0031966//mitochondrial membrane;GO:0032592//integral component of mitochondrial membrane	GO:0005515//protein binding;GO:0031625//ubiquitin protein ligase binding	GO:0001836//release of cytochrome c from mitochondria;GO:0006626//protein targeting to mitochondrion;GO:0006915//apoptotic process;GO:0006919//activation of cysteine-type endopeptidase activity involved in apoptotic process;GO:0008637//apoptotic mitochondrial changes;GO:0010918//positive regulation of mitochondrial membrane potential;GO:0031334//positive regulation of protein complex assembly;GO:…
ENSMUST00000120381	284498.75	268958.75	303130.90625	412981.46875	395638.96875	495460.375	285529.46875	434693.604166667	0.606359218725845	0.0010028508454159	0.0180152679693377	Stt3a	STT3, subunit of the oligosaccharyltransferase complex, homolog A (S. cerevisiae) [Source:MGI Symbol;Acc:MGI:105124]	Metabolism;Genetic Information Processing;Metabolism;Metabolism	Global and overview maps;Folding, sorting and degradation;Glycan biosynthesis and metabolism;Glycan biosynthesis and metabolism	ko01100//Metabolic pathways;ko04141//Protein processing in endoplasmic reticulum;ko00510//N-Glycan biosynthesis;ko00513//Various types of N-glycan biosynthesis	K07151;K07151;K07151;K07151	GO:0005783//endoplasmic reticulum;GO:0005789//endoplasmic reticulum membrane;GO:0008250//oligosaccharyltransferase complex;GO:0016020//membrane;GO:0016021//integral component of membrane;GO:0035000//oligosaccharyltransferase III complex	GO:0004576//oligosaccharyl transferase activity;GO:0004579//dolichyl-diphosphooligosaccharide-protein glycotransferase activity;GO:0016740//transferase activity;GO:0016757//transferase activity, transferring glycosyl groups;GO:0046872//metal ion binding	GO:0006486//protein glycosylation;GO:0006487//protein N-linked glycosylation;GO:0018279//protein N-linked glycosylation via asparagine;GO:0043686//co-translational protein modification;GO:0043687//post-translational protein modification
ENSMUST00000043722	272409.84375	288371.59375	341295.84375	984937.9375	545232.6875	959644	300692.427083333	829938.208333333	1.46471539280128	0.00100331457887391	0.0180152679693377	Lgals3bp	lectin, galactoside-binding, soluble, 3 binding protein [Source:MGI Symbol;Acc:MGI:99554]	-	-	-	-	GO:0005576//extracellular region;GO:0005615//extracellular space;GO:0016020//membrane	GO:0005044//scavenger receptor activity;GO:0005515//protein binding	GO:0006897//endocytosis;GO:0007155//cell adhesion
ENSMUST00000043735	496824.125	121557.3671875	201698.65625	281607.8125	810601.4375	621676.3125	273360.049479167	571295.1875	1.06343396292606	0.00102370013656524	0.0182744702303772	Mthfd1l	methylenetetrahydrofolate dehydrogenase (NADP+ dependent) 1-like [Source:MGI Symbol;Acc:MGI:1924836]	Metabolism;Metabolism	Global and overview maps;Metabolism of cofactors and vitamins	ko01100//Metabolic pathways;ko00670//One carbon pool by folate	K13402;K13402	GO:0005737//cytoplasm;GO:0005739//mitochondrion	GO:0000166//nucleotide binding;GO:0004329//formate-tetrahydrofolate ligase activity;GO:0004488//methylenetetrahydrofolate dehydrogenase (NADP+) activity;GO:0005524//ATP binding;GO:0016874//ligase activity;GO:0042803//protein homodimerization activity	GO:0001843//neural tube closure;GO:0006730//one-carbon metabolic process;GO:0006760//folic acid-containing compound metabolic process;GO:0009113//purine nucleobase biosynthetic process;GO:0009257//10-formyltetrahydrofolate biosynthetic process;GO:0015942//formate metabolic process;GO:0035999//tetrahydrofolate interconversion;GO:0048702//embryonic neurocranium morphogenesis;GO:0048703//embryonic v…
ENSMUST00000117291	496824.125	121557.3671875	201698.65625	281607.8125	810601.4375	621676.3125	273360.049479167	571295.1875	1.06343396292606	0.00102370013656524	0.0182744702303772	Mthfd1l	methylenetetrahydrofolate dehydrogenase (NADP+ dependent) 1-like [Source:MGI Symbol;Acc:MGI:1924836]	Metabolism;Metabolism	Global and overview maps;Metabolism of cofactors and vitamins	ko01100//Metabolic pathways;ko00670//One carbon pool by folate	K13402;K13402	GO:0005737//cytoplasm;GO:0005739//mitochondrion	GO:0000166//nucleotide binding;GO:0004329//formate-tetrahydrofolate ligase activity;GO:0004488//methylenetetrahydrofolate dehydrogenase (NADP+) activity;GO:0005524//ATP binding;GO:0016874//ligase activity;GO:0042803//protein homodimerization activity	GO:0001843//neural tube closure;GO:0006730//one-carbon metabolic process;GO:0006760//folic acid-containing compound metabolic process;GO:0009113//purine nucleobase biosynthetic process;GO:0009257//10-formyltetrahydrofolate biosynthetic process;GO:0015942//formate metabolic process;GO:0035999//tetrahydrofolate interconversion;GO:0048702//embryonic neurocranium morphogenesis;GO:0048703//embryonic v…
ENSMUST00000120585	496824.125	121557.3671875	201698.65625	281607.8125	810601.4375	621676.3125	273360.049479167	571295.1875	1.06343396292606	0.00102370013656524	0.0182744702303772	Mthfd1l	methylenetetrahydrofolate dehydrogenase (NADP+ dependent) 1-like [Source:MGI Symbol;Acc:MGI:1924836]	Metabolism;Metabolism	Global and overview maps;Metabolism of cofactors and vitamins	ko01100//Metabolic pathways;ko00670//One carbon pool by folate	K13402;K13402	GO:0005737//cytoplasm;GO:0005739//mitochondrion	GO:0000166//nucleotide binding;GO:0004329//formate-tetrahydrofolate ligase activity;GO:0004488//methylenetetrahydrofolate dehydrogenase (NADP+) activity;GO:0005524//ATP binding;GO:0016874//ligase activity;GO:0042803//protein homodimerization activity	GO:0001843//neural tube closure;GO:0006730//one-carbon metabolic process;GO:0006760//folic acid-containing compound metabolic process;GO:0009113//purine nucleobase biosynthetic process;GO:0009257//10-formyltetrahydrofolate biosynthetic process;GO:0015942//formate metabolic process;GO:0035999//tetrahydrofolate interconversion;GO:0048702//embryonic neurocranium morphogenesis;GO:0048703//embryonic v…
ENSMUST00000099501	70348.96875	89627.1875	107900.3203125	131691.328125	160875.578125	183970.8125	89292.1588541667	158845.90625	0.831022513151367	0.00107584073810861	0.0189267126383443	Arhgap45	Rho GTPase activating protein 45 [Source:MGI Symbol;Acc:MGI:1917969]	-	-	-	-	-	-	GO:0007165//signal transduction;GO:0035556//intracellular signal transduction
ENSMUST00000114232	15104.1923828125	18542.84375	20298.072265625	54605.234375	39795.51171875	62898.09765625	17981.7027994792	52432.9479166667	1.54394401509699	0.00108529675827475	0.0190380442870848	H2-DMb1	histocompatibility 2, class II, locus Mb1 [Source:MGI Symbol;Acc:MGI:95922]	Human Diseases;Human Diseases;Human Diseases;Cellular Processes;Human Diseases;Human Diseases;Human Diseases;Human Diseases;Human Diseases;Organismal Systems;Human Diseases;Environmental Information Processing;Human Diseases;Human Diseases;Organismal Systems;Human Diseases;Human Diseases;Organismal Systems;Human Diseases;Organismal Systems;Organismal Systems;Human Diseases;Human Diseases;Human Di…	Infectious diseases;Infectious diseases;Infectious diseases;Transport and catabolism;Infectious diseases;Immune diseases;Infectious diseases;Cardiovascular diseases;Infectious diseases;Immune system;Infectious diseases;Signaling molecules and interaction;Immune diseases;Infectious diseases;Immune system;Immune diseases;Immune diseases;Immune system;Immune diseases;Immune system;Immune system;Immu…	ko05169//Epstein-Barr virus infection;ko05152//Tuberculosis;ko05168//Herpes simplex infection;ko04145//Phagosome;ko05166//HTLV-I infection;ko05322//Systemic lupus erythematosus;ko05164//Influenza A;ko05416//Viral myocarditis;ko05145//Toxoplasmosis;ko04640//Hematopoietic cell lineage;ko05140//Leishmaniasis;ko04514//Cell adhesion molecules (CAMs);ko05323//Rheumatoid arthritis;ko05150//Staphylococcu…	K06752;K06752;K06752;K06752;K06752;K06752;K06752;K06752;K06752;K06752;K06752;K06752;K06752;K06752;K06752;K06752;K06752;K06752;K06752;K06752;K06752;K06752;K06752;K06752	GO:0016020//membrane;GO:0016021//integral component of membrane;GO:0042613//MHC class II protein complex	-	GO:0006955//immune response;GO:0019882//antigen processing and presentation
ENSMUST00000026572	83477.4765625	136349.59375	103977.0390625	54894.18359375	47733.8984375	63580.09765625	107934.703125	55402.7265625	-0.96212991095853	0.00109882428461423	0.0191648808608792	Hras	Harvey rat sarcoma virus oncogene [Source:MGI Symbol;Acc:MGI:96224]	Human Diseases;Environmental Information Processing;Cellular Processes;Human Diseases;Human Diseases;Human Diseases;Human Diseases;Human Diseases;Environmental Information Processing;Human Diseases;Environmental Information Processing;Organismal Systems;Cellular Processes;Environmental Information Processing;Cellular Processes;Environmental Information Processing;Human Diseases;Human Diseases;Hum…	Cancers;Signal transduction;Transport and catabolism;Infectious diseases;Neurodegenerative diseases;Infectious diseases;Infectious disease: viral;Infectious diseases;Signal transduction;Cancers;Signal transduction;Environmental adaptation;Cell motility;Signal transduction;Cellular community - eukaryotes;Signal transduction;Infectious diseases;Cancers;Infectious diseases;Immune system;Substance de…	ko05200//Pathways in cancer;ko04151//PI3K-Akt signaling pathway;ko04144//Endocytosis;ko05165//Human papillomavirus infection;ko05010//Alzheimer disease;ko05132//Salmonella infection;ko05170//Human immunodeficiency virus 1 infection;ko05163//Human cytomegalovirus infection;ko04010//MAPK signaling pathway;ko05203//Viral carcinogenesis;ko04072//Phospholipase D signaling pathway;ko04714//Thermogenesi…	K02833;K02833;K02833;K02833;K02833;K02833;K02833;K02833;K02833;K02833;K02833;K02833;K02833;K02833;K02833;K02833;K02833;K02833;K02833;K02833;K02833;K02833;K02833;K02833;K02833;K02833;K02833;K02833;K02833;K02833;K02833;K02833;K02833;K02833;K02833;K02833;K02833;K02833;K02833;K02833;K02833;K02833;K02833;K02833;K02833;K02833;K02833;K02833;K02833;K02833;K02833;K02833;K02833;K02833;K02833;K02833;K02833;…	GO:0000139//Golgi membrane;GO:0005654//nucleoplasm;GO:0005794//Golgi apparatus;GO:0005829//cytosol;GO:0005886//plasma membrane;GO:0016020//membrane;GO:0043231//intracellular membrane-bounded organelle;GO:0098978//glutamatergic synapse	GO:0000166//nucleotide binding;GO:0003924//GTPase activity;GO:0005515//protein binding;GO:0005525//GTP binding;GO:0008022//protein C-terminus binding;GO:0019003//GDP binding;GO:0044877//protein-containing complex binding	GO:0001889//liver development;GO:0001934//positive regulation of protein phosphorylation;GO:0006897//endocytosis;GO:0006915//apoptotic process;GO:0007050//cell cycle arrest;GO:0007093//mitotic cell cycle checkpoint;GO:0007165//signal transduction;GO:0007264//small GTPase mediated signal transduction;GO:0007265//Ras protein signal transduction;GO:0007569//cell aging;GO:0008284//positive regulation…
ENSMUST00000097957	83477.4765625	136349.59375	103977.0390625	54894.18359375	47733.8984375	63580.09765625	107934.703125	55402.7265625	-0.96212991095853	0.00109882428461423	0.0191648808608792	Hras	Harvey rat sarcoma virus oncogene [Source:MGI Symbol;Acc:MGI:96224]	Human Diseases;Environmental Information Processing;Cellular Processes;Human Diseases;Human Diseases;Human Diseases;Human Diseases;Human Diseases;Environmental Information Processing;Human Diseases;Environmental Information Processing;Organismal Systems;Cellular Processes;Environmental Information Processing;Cellular Processes;Environmental Information Processing;Human Diseases;Human Diseases;Hum…	Cancers;Signal transduction;Transport and catabolism;Infectious diseases;Neurodegenerative diseases;Infectious diseases;Infectious disease: viral;Infectious diseases;Signal transduction;Cancers;Signal transduction;Environmental adaptation;Cell motility;Signal transduction;Cellular community - eukaryotes;Signal transduction;Infectious diseases;Cancers;Infectious diseases;Immune system;Substance de…	ko05200//Pathways in cancer;ko04151//PI3K-Akt signaling pathway;ko04144//Endocytosis;ko05165//Human papillomavirus infection;ko05010//Alzheimer disease;ko05132//Salmonella infection;ko05170//Human immunodeficiency virus 1 infection;ko05163//Human cytomegalovirus infection;ko04010//MAPK signaling pathway;ko05203//Viral carcinogenesis;ko04072//Phospholipase D signaling pathway;ko04714//Thermogenesi…	K02833;K02833;K02833;K02833;K02833;K02833;K02833;K02833;K02833;K02833;K02833;K02833;K02833;K02833;K02833;K02833;K02833;K02833;K02833;K02833;K02833;K02833;K02833;K02833;K02833;K02833;K02833;K02833;K02833;K02833;K02833;K02833;K02833;K02833;K02833;K02833;K02833;K02833;K02833;K02833;K02833;K02833;K02833;K02833;K02833;K02833;K02833;K02833;K02833;K02833;K02833;K02833;K02833;K02833;K02833;K02833;K02833;…	GO:0000139//Golgi membrane;GO:0005654//nucleoplasm;GO:0005794//Golgi apparatus;GO:0005829//cytosol;GO:0005886//plasma membrane;GO:0016020//membrane;GO:0043231//intracellular membrane-bounded organelle;GO:0098978//glutamatergic synapse	GO:0000166//nucleotide binding;GO:0003924//GTPase activity;GO:0005515//protein binding;GO:0005525//GTP binding;GO:0008022//protein C-terminus binding;GO:0019003//GDP binding;GO:0044877//protein-containing complex binding	GO:0001934//positive regulation of protein phosphorylation;GO:0006897//endocytosis;GO:0006915//apoptotic process;GO:0007050//cell cycle arrest;GO:0007093//mitotic cell cycle checkpoint;GO:0007165//signal transduction;GO:0007264//small GTPase mediated signal transduction;GO:0007265//Ras protein signal transduction;GO:0007569//cell aging;GO:0008284//positive regulation of cell proliferation;GO:0008…
ENSMUST00000042665	51939.2109375	16640.08984375	63533.6328125	117228.4375	61561.671875	90068.578125	44037.64453125	89619.5625	1.02507637899258	0.00136328211212246	0.0231796039566744	Parp14	poly (ADP-ribose) polymerase family, member 14 [Source:MGI Symbol;Acc:MGI:1919489]	-	-	-	-	GO:0005634//nucleus;GO:0005737//cytoplasm;GO:0005829//cytosol;GO:0005886//plasma membrane	GO:0003950//NAD+ ADP-ribosyltransferase activity;GO:0005515//protein binding;GO:0016740//transferase activity;GO:0016757//transferase activity, transferring glycosyl groups;GO:0019899//enzyme binding;GO:0070403//NAD+ binding;GO:1990404//protein ADP-ribosylase activity	GO:0002376//immune system process;GO:0006471//protein ADP-ribosylation;GO:0010629//negative regulation of gene expression;GO:0042531//positive regulation of tyrosine phosphorylation of STAT protein;GO:0042532//negative regulation of tyrosine phosphorylation of STAT protein;GO:0045087//innate immune response;GO:0060336//negative regulation of interferon-gamma-mediated signaling pathway;GO:0070212/…
ENSMUST00000180086	377211.6875	318251.09375	272031.8125	235278.625	257912.40625	100376.421875	322498.197916667	197855.817708333	-0.704841612324754	0.00140397483168837	0.0236731157908231	H1f0	H1.0 linker histone [Source:MGI Symbol;Acc:MGI:95893]	-	-	-	-	GO:0000786//nucleosome;GO:0000790//nuclear chromatin;GO:0005634//nucleus;GO:0005654//nucleoplasm;GO:0005694//chromosome;GO:0005719//nuclear euchromatin;GO:0005794//Golgi apparatus;GO:0015629//actin cytoskeleton;GO:0016604//nuclear body;GO:0017053//transcriptional repressor complex	GO:0003677//DNA binding;GO:0003680//AT DNA binding;GO:0003690//double-stranded DNA binding;GO:0031490//chromatin DNA binding;GO:0031492//nucleosomal DNA binding	GO:0000122//negative regulation of transcription by RNA polymerase II;GO:0006334//nucleosome assembly;GO:0006342//chromatin silencing;GO:0006355//regulation of transcription, DNA-templated;GO:0016584//nucleosome positioning;GO:0030261//chromosome condensation;GO:0031936//negative regulation of chromatin silencing;GO:0045910//negative regulation of DNA recombination;GO:2000679//positive regulation…
ENSMUST00000103449	1	14270.6953125	1	12302.8076171875	12803.3564453125	62760.5234375	4757.56510416667	29288.8958333333	2.62205850177135	0.00141240897947978	0.0236841142096238	Ighv2-5	immunoglobulin heavy variable 2-5 [Source:MGI Symbol;Acc:MGI:4439517]	Environmental Information Processing;Human Diseases;Human Diseases;Environmental Information Processing;Cellular Processes;Organismal Systems;Environmental Information Processing;Human Diseases;Human Diseases;Environmental Information Processing;Human Diseases;Human Diseases;Organismal Systems;Organismal Systems;Human Diseases;Organismal Systems;Human Diseases;Organismal Systems;Human Diseases;Hu…	Signal transduction;Infectious diseases;Infectious diseases;Signal transduction;Transport and catabolism;Immune system;Signal transduction;Cancers;Immune diseases;Signal transduction;Cardiovascular diseases;Infectious diseases;Immune system;Immune system;Cardiovascular diseases;Immune system;Infectious diseases;Immune system;Immune diseases;Infectious diseases;Infectious diseases;Infectious disea…	ko04151//PI3K-Akt signaling pathway;ko05169//Epstein-Barr virus infection;ko05152//Tuberculosis;ko04072//Phospholipase D signaling pathway;ko04145//Phagosome;ko04666//Fc gamma R-mediated phagocytosis;ko04020//Calcium signaling pathway;ko05202//Transcriptional misregulation in cancers;ko05322//Systemic lupus erythematosus;ko04064//NF-kappa B signaling pathway;ko05414//Dilated cardiomyopathy (DCM);…	K06856;K06856;K06856;K06856;K06856;K06856;K06856;K06856;K06856;K06856;K06856;K06856;K06856;K06856;K06856;K06856;K06856;K06856;K06856;K06856;K06856;K06856;K06856;K06856;K06856;K06856;K06856	GO:0009897//external side of plasma membrane;GO:0042571//immunoglobulin complex, circulating	GO:0003823//antigen binding;GO:0034987//immunoglobulin receptor binding	GO:0006910//phagocytosis, recognition;GO:0006911//phagocytosis, engulfment;GO:0006958//complement activation, classical pathway;GO:0042742//defense response to bacterium;GO:0045087//innate immune response;GO:0050853//B cell receptor signaling pathway;GO:0050871//positive regulation of B cell activation
ENSMUST00000195707	1	14270.6953125	1	12302.8076171875	12803.3564453125	62760.5234375	4757.56510416667	29288.8958333333	2.62205850177135	0.00141240897947978	0.0236841142096238	Ighv2-5	immunoglobulin heavy variable 2-5 [Source:MGI Symbol;Acc:MGI:4439517]	Environmental Information Processing;Human Diseases;Human Diseases;Environmental Information Processing;Cellular Processes;Organismal Systems;Environmental Information Processing;Human Diseases;Human Diseases;Environmental Information Processing;Human Diseases;Human Diseases;Organismal Systems;Organismal Systems;Human Diseases;Organismal Systems;Human Diseases;Organismal Systems;Human Diseases;Hu…	Signal transduction;Infectious diseases;Infectious diseases;Signal transduction;Transport and catabolism;Immune system;Signal transduction;Cancers;Immune diseases;Signal transduction;Cardiovascular diseases;Infectious diseases;Immune system;Immune system;Cardiovascular diseases;Immune system;Infectious diseases;Immune system;Immune diseases;Infectious diseases;Infectious diseases;Infectious disea…	ko04151//PI3K-Akt signaling pathway;ko05169//Epstein-Barr virus infection;ko05152//Tuberculosis;ko04072//Phospholipase D signaling pathway;ko04145//Phagosome;ko04666//Fc gamma R-mediated phagocytosis;ko04020//Calcium signaling pathway;ko05202//Transcriptional misregulation in cancers;ko05322//Systemic lupus erythematosus;ko04064//NF-kappa B signaling pathway;ko05414//Dilated cardiomyopathy (DCM);…	K06856;K06856;K06856;K06856;K06856;K06856;K06856;K06856;K06856;K06856;K06856;K06856;K06856;K06856;K06856;K06856;K06856;K06856;K06856;K06856;K06856;K06856;K06856;K06856;K06856;K06856;K06856	GO:0009897//external side of plasma membrane;GO:0042571//immunoglobulin complex, circulating	GO:0003823//antigen binding;GO:0034987//immunoglobulin receptor binding	GO:0006910//phagocytosis, recognition;GO:0006911//phagocytosis, engulfment;GO:0006958//complement activation, classical pathway;GO:0042742//defense response to bacterium;GO:0045087//innate immune response;GO:0050853//B cell receptor signaling pathway;GO:0050871//positive regulation of B cell activation
ENSMUST00000103312	88457	80664.7890625	154540.9375	756124.5625	342175.96875	135689.5	107887.575520833	411330.010416667	1.93076760225474	0.00144516383702526	0.0241005815780076	Igkv9-124	immunoglobulin kappa chain variable 9-124 [Source:MGI Symbol;Acc:MGI:3646892]	-	-	-	-	GO:0005615//extracellular space	-	GO:0002377//immunoglobulin production;GO:0006955//immune response
ENSMUST00000103351	1.38063097000122	1.18822073936462	10645.4541015625	141964.5625	157433.1875	119021.9296875	3549.34098442396	139473.2265625	5.29629321658471	0.00149691327378512	0.0247600845041577	Igkv4-63	immunoglobulin kappa variable 4-63 [Source:MGI Symbol;Acc:MGI:3645235]	-	-	-	-	GO:0005615//extracellular space	-	GO:0002377//immunoglobulin production;GO:0006955//immune response
ENSMUST00000045912	28130.091796875	1.22640931606293	8444.2958984375	156124.578125	75413.0546875	113726.484375	12191.8713682095	115088.0390625	3.23874641219016	0.00159398145310343	0.0260821642608618	Rptn	repetin [Source:MGI Symbol;Acc:MGI:1099055]	-	-	-	-	GO:0001533//cornified envelope;GO:0005576//extracellular region	GO:0005509//calcium ion binding;GO:0046872//metal ion binding;GO:0046914//transition metal ion binding	-
ENSMUST00000075340	1226631.75	1334569.25	963182.5625	612189.875	704114	716398.625	1174794.52083333	677567.5	-0.793971860589919	0.00165057291551787	0.0267643317478097	Ctnna2	catenin (cadherin associated protein), alpha 2 [Source:MGI Symbol;Acc:MGI:88275]	Human Diseases;Organismal Systems;Environmental Information Processing;Human Diseases;Cellular Processes;Human Diseases;Human Diseases;Human Diseases	Cancers;Immune system;Signal transduction;Infectious diseases;Cellular community - eukaryotes;Cancers;Cardiovascular diseases;Cancers	ko05200//Pathways in cancer;ko04670//Leukocyte transendothelial migration;ko04390//Hippo signaling pathway;ko05100//Bacterial invasion of epithelial cells;ko04520//Adherens junction;ko05226//Gastric cancer;ko05412//Arrhythmogenic right ventricular cardiomyopathy (ARVC);ko05213//Endometrial cancer	K05691;K05691;K05691;K05691;K05691;K05691;K05691;K05691	GO:0005634//nucleus;GO:0005737//cytoplasm;GO:0005856//cytoskeleton;GO:0005886//plasma membrane;GO:0005912//adherens junction;GO:0014069//postsynaptic density;GO:0015629//actin cytoskeleton;GO:0016020//membrane;GO:0016323//basolateral plasma membrane;GO:0030027//lamellipodium;GO:0030054//cell junction;GO:0030424//axon;GO:0042995//cell projection;GO:0098686//hippocampal mossy fiber to CA3 synapse;G…	GO:0005198//structural molecule activity;GO:0042802//identical protein binding;GO:0045296//cadherin binding;GO:0051015//actin filament binding	GO:0007155//cell adhesion;GO:0007275//multicellular organism development;GO:0007409//axonogenesis;GO:0010975//regulation of neuron projection development;GO:0021942//radial glia guided migration of Purkinje cell;GO:0030154//cell differentiation;GO:0034316//negative regulation of Arp2/3 complex-mediated actin nucleation;GO:0048813//dendrite morphogenesis;GO:0048854//brain morphogenesis;GO:0051823/…
ENSMUST00000159626	1226631.75	1334569.25	963182.5625	612189.875	704114	716398.625	1174794.52083333	677567.5	-0.793971860589919	0.00165057291551787	0.0267643317478097	Ctnna2	catenin (cadherin associated protein), alpha 2 [Source:MGI Symbol;Acc:MGI:88275]	Human Diseases;Organismal Systems;Environmental Information Processing;Human Diseases;Cellular Processes;Human Diseases;Human Diseases;Human Diseases	Cancers;Immune system;Signal transduction;Infectious diseases;Cellular community - eukaryotes;Cancers;Cardiovascular diseases;Cancers	ko05200//Pathways in cancer;ko04670//Leukocyte transendothelial migration;ko04390//Hippo signaling pathway;ko05100//Bacterial invasion of epithelial cells;ko04520//Adherens junction;ko05226//Gastric cancer;ko05412//Arrhythmogenic right ventricular cardiomyopathy (ARVC);ko05213//Endometrial cancer	K05691;K05691;K05691;K05691;K05691;K05691;K05691;K05691	GO:0005634//nucleus;GO:0005737//cytoplasm;GO:0005856//cytoskeleton;GO:0005886//plasma membrane;GO:0005912//adherens junction;GO:0014069//postsynaptic density;GO:0015629//actin cytoskeleton;GO:0016020//membrane;GO:0016323//basolateral plasma membrane;GO:0030027//lamellipodium;GO:0030054//cell junction;GO:0030424//axon;GO:0042995//cell projection;GO:0098686//hippocampal mossy fiber to CA3 synapse;G…	GO:0005198//structural molecule activity;GO:0042802//identical protein binding;GO:0045296//cadherin binding;GO:0051015//actin filament binding	GO:0007155//cell adhesion;GO:0007275//multicellular organism development;GO:0007409//axonogenesis;GO:0010975//regulation of neuron projection development;GO:0021942//radial glia guided migration of Purkinje cell;GO:0030154//cell differentiation;GO:0034316//negative regulation of Arp2/3 complex-mediated actin nucleation;GO:0048813//dendrite morphogenesis;GO:0048854//brain morphogenesis;GO:0051823/…
ENSMUST00000160894	1226631.75	1334569.25	963182.5625	612189.875	704114	716398.625	1174794.52083333	677567.5	-0.793971860589919	0.00165057291551787	0.0267643317478097	Ctnna2	catenin (cadherin associated protein), alpha 2 [Source:MGI Symbol;Acc:MGI:88275]	Human Diseases;Organismal Systems;Environmental Information Processing;Human Diseases;Cellular Processes;Human Diseases;Human Diseases;Human Diseases	Cancers;Immune system;Signal transduction;Infectious diseases;Cellular community - eukaryotes;Cancers;Cardiovascular diseases;Cancers	ko05200//Pathways in cancer;ko04670//Leukocyte transendothelial migration;ko04390//Hippo signaling pathway;ko05100//Bacterial invasion of epithelial cells;ko04520//Adherens junction;ko05226//Gastric cancer;ko05412//Arrhythmogenic right ventricular cardiomyopathy (ARVC);ko05213//Endometrial cancer	K05691;K05691;K05691;K05691;K05691;K05691;K05691;K05691	GO:0015629//actin cytoskeleton	GO:0005198//structural molecule activity;GO:0045296//cadherin binding;GO:0051015//actin filament binding	GO:0007155//cell adhesion
ENSMUST00000161846	1226631.75	1334569.25	963182.5625	612189.875	704114	716398.625	1174794.52083333	677567.5	-0.793971860589919	0.00165057291551787	0.0267643317478097	Ctnna2	catenin (cadherin associated protein), alpha 2 [Source:MGI Symbol;Acc:MGI:88275]	Human Diseases;Organismal Systems;Environmental Information Processing;Human Diseases;Cellular Processes;Human Diseases;Human Diseases;Human Diseases	Cancers;Immune system;Signal transduction;Infectious diseases;Cellular community - eukaryotes;Cancers;Cardiovascular diseases;Cancers	ko05200//Pathways in cancer;ko04670//Leukocyte transendothelial migration;ko04390//Hippo signaling pathway;ko05100//Bacterial invasion of epithelial cells;ko04520//Adherens junction;ko05226//Gastric cancer;ko05412//Arrhythmogenic right ventricular cardiomyopathy (ARVC);ko05213//Endometrial cancer	K05691;K05691;K05691;K05691;K05691;K05691;K05691;K05691	GO:0005634//nucleus;GO:0005737//cytoplasm;GO:0005856//cytoskeleton;GO:0005886//plasma membrane;GO:0005912//adherens junction;GO:0014069//postsynaptic density;GO:0015629//actin cytoskeleton;GO:0016020//membrane;GO:0016323//basolateral plasma membrane;GO:0030027//lamellipodium;GO:0030054//cell junction;GO:0030424//axon;GO:0042995//cell projection;GO:0098686//hippocampal mossy fiber to CA3 synapse;G…	GO:0005198//structural molecule activity;GO:0042802//identical protein binding;GO:0045296//cadherin binding;GO:0051015//actin filament binding	GO:0007155//cell adhesion;GO:0007275//multicellular organism development;GO:0007409//axonogenesis;GO:0010975//regulation of neuron projection development;GO:0021942//radial glia guided migration of Purkinje cell;GO:0030154//cell differentiation;GO:0034316//negative regulation of Arp2/3 complex-mediated actin nucleation;GO:0048813//dendrite morphogenesis;GO:0048854//brain morphogenesis;GO:0051823/…
ENSMUST00000146233	40910.30078125	29759.265625	16434.5390625	104357.1875	62218.1875	140083.546875	29034.7018229167	102219.640625	1.81582230114326	0.00176347084911855	0.0284728038689247	Xaf1	XIAP associated factor 1 [Source:MGI Symbol;Acc:MGI:3772572]	-	-	-	-	GO:0005634//nucleus;GO:0005654//nucleoplasm;GO:0005737//cytoplasm;GO:0005739//mitochondrion	GO:0046872//metal ion binding	GO:0006915//apoptotic process;GO:0031333//negative regulation of protein complex assembly;GO:0035456//response to interferon-beta
ENSMUST00000124830	146255.09375	528996.3125	171731.28125	128572.96875	160115.640625	210680.0625	282327.5625	166456.223958333	-0.762227164912845	0.00181456555056729	0.0292202658896907	Dsp	desmoplakin [Source:MGI Symbol;Acc:MGI:109611]	Human Diseases	Cardiovascular diseases	ko05412//Arrhythmogenic right ventricular cardiomyopathy (ARVC)	K10381	GO:0001533//cornified envelope;GO:0005737//cytoplasm;GO:0005856//cytoskeleton;GO:0005882//intermediate filament;GO:0005886//plasma membrane;GO:0005911//cell-cell junction;GO:0005916//fascia adherens;GO:0014704//intercalated disc;GO:0016020//membrane;GO:0016323//basolateral plasma membrane;GO:0030054//cell junction;GO:0030057//desmosome	GO:0005080//protein kinase C binding;GO:0005198//structural molecule activity;GO:0005515//protein binding;GO:0050839//cell adhesion molecule binding;GO:0097110//scaffold protein binding	GO:0002934//desmosome organization;GO:0003223//ventricular compact myocardium morphogenesis;GO:0018149//peptide cross-linking;GO:0030216//keratinocyte differentiation;GO:0034332//adherens junction organization;GO:0042060//wound healing;GO:0043588//skin development;GO:0045104//intermediate filament cytoskeleton organization;GO:0045109//intermediate filament organization;GO:0086073//bundle of His c…
ENSMUST00000025651	55928.5	60290.4296875	83449.4140625	163508.15625	149688.484375	170154.53125	66556.1145833333	161117.057291667	1.27546611940496	0.00184072160295208	0.0293310795737417	Fen1	flap structure specific endonuclease 1 [Source:MGI Symbol;Acc:MGI:102779]	Genetic Information Processing;Genetic Information Processing;Genetic Information Processing	Replication and repair;Replication and repair;Replication and repair	ko03410//Base excision repair;ko03030//DNA replication;ko03450//Non-homologous end-joining	K04799;K04799;K04799	GO:0005634//nucleus;GO:0005654//nucleoplasm;GO:0005730//nucleolus;GO:0005739//mitochondrion	GO:0000287//magnesium ion binding;GO:0003677//DNA binding;GO:0003824//catalytic activity;GO:0004518//nuclease activity;GO:0004519//endonuclease activity;GO:0004527//exonuclease activity;GO:0008409//5'-3' exonuclease activity;GO:0016787//hydrolase activity;GO:0016788//hydrolase activity, acting on ester bonds;GO:0017108//5'-flap endonuclease activity;GO:0046872//metal ion binding	GO:0006260//DNA replication;GO:0006281//DNA repair;GO:0006284//base-excision repair;GO:0006974//cellular response to DNA damage stimulus;GO:0043137//DNA replication, removal of RNA primer;GO:0090502//RNA phosphodiester bond hydrolysis, endonucleolytic
ENSMUST00000116542	55928.5	60290.4296875	83449.4140625	163508.15625	149688.484375	170154.53125	66556.1145833333	161117.057291667	1.27546611940496	0.00184072160295208	0.0293310795737417	Fen1	flap structure specific endonuclease 1 [Source:MGI Symbol;Acc:MGI:102779]	Genetic Information Processing;Genetic Information Processing;Genetic Information Processing	Replication and repair;Replication and repair;Replication and repair	ko03410//Base excision repair;ko03030//DNA replication;ko03450//Non-homologous end-joining	K04799;K04799;K04799	GO:0005634//nucleus;GO:0005654//nucleoplasm;GO:0005730//nucleolus;GO:0005739//mitochondrion	GO:0000287//magnesium ion binding;GO:0003677//DNA binding;GO:0003824//catalytic activity;GO:0004518//nuclease activity;GO:0004519//endonuclease activity;GO:0004527//exonuclease activity;GO:0008409//5'-3' exonuclease activity;GO:0016787//hydrolase activity;GO:0016788//hydrolase activity, acting on ester bonds;GO:0017108//5'-flap endonuclease activity;GO:0046872//metal ion binding	GO:0006260//DNA replication;GO:0006281//DNA repair;GO:0006284//base-excision repair;GO:0006974//cellular response to DNA damage stimulus;GO:0043137//DNA replication, removal of RNA primer;GO:0090502//RNA phosphodiester bond hydrolysis, endonucleolytic
ENSMUST00000142241	55928.5	60290.4296875	83449.4140625	163508.15625	149688.484375	170154.53125	66556.1145833333	161117.057291667	1.27546611940496	0.00184072160295208	0.0293310795737417	Fen1	flap structure specific endonuclease 1 [Source:MGI Symbol;Acc:MGI:102779]	Genetic Information Processing;Genetic Information Processing;Genetic Information Processing	Replication and repair;Replication and repair;Replication and repair	ko03410//Base excision repair;ko03030//DNA replication;ko03450//Non-homologous end-joining	K04799;K04799;K04799	GO:0005634//nucleus;GO:0005654//nucleoplasm;GO:0005730//nucleolus;GO:0005739//mitochondrion	GO:0000287//magnesium ion binding;GO:0003677//DNA binding;GO:0003824//catalytic activity;GO:0004518//nuclease activity;GO:0004519//endonuclease activity;GO:0004527//exonuclease activity;GO:0008409//5'-3' exonuclease activity;GO:0016787//hydrolase activity;GO:0016788//hydrolase activity, acting on ester bonds;GO:0017108//5'-flap endonuclease activity;GO:0046872//metal ion binding	GO:0006260//DNA replication;GO:0006281//DNA repair;GO:0006284//base-excision repair;GO:0006974//cellular response to DNA damage stimulus;GO:0043137//DNA replication, removal of RNA primer;GO:0090502//RNA phosphodiester bond hydrolysis, endonucleolytic
ENSMUST00000156291	55928.5	60290.4296875	83449.4140625	163508.15625	149688.484375	170154.53125	66556.1145833333	161117.057291667	1.27546611940496	0.00184072160295208	0.0293310795737417	Fen1	flap structure specific endonuclease 1 [Source:MGI Symbol;Acc:MGI:102779]	Genetic Information Processing;Genetic Information Processing;Genetic Information Processing	Replication and repair;Replication and repair;Replication and repair	ko03410//Base excision repair;ko03030//DNA replication;ko03450//Non-homologous end-joining	K04799;K04799;K04799	GO:0000784//nuclear chromosome, telomeric region;GO:0005634//nucleus;GO:0005654//nucleoplasm;GO:0005730//nucleolus;GO:0005739//mitochondrion;GO:0032991//protein-containing complex	GO:0000287//magnesium ion binding;GO:0003677//DNA binding;GO:0003824//catalytic activity;GO:0004518//nuclease activity;GO:0004519//endonuclease activity;GO:0004523//RNA-DNA hybrid ribonuclease activity;GO:0004527//exonuclease activity;GO:0008409//5'-3' exonuclease activity;GO:0016787//hydrolase activity;GO:0016788//hydrolase activity, acting on ester bonds;GO:0017108//5'-flap endonuclease activit…	GO:0006260//DNA replication;GO:0006281//DNA repair;GO:0006284//base-excision repair;GO:0006974//cellular response to DNA damage stimulus;GO:0007613//memory;GO:0043137//DNA replication, removal of RNA primer;GO:0045876//positive regulation of sister chromatid cohesion;GO:0090305//nucleic acid phosphodiester bond hydrolysis;GO:0090502//RNA phosphodiester bond hydrolysis, endonucleolytic
ENSMUST00000035061	2081831.125	2301224.25	1593056.5	578013.125	1302294	793022.5	1992037.29166667	891109.875	-1.1605694214458	0.00187362799742696	0.0296999313029633	Ngp	neutrophilic granule protein [Source:MGI Symbol;Acc:MGI:105983]	-	-	-	-	GO:0005576//extracellular region;GO:0005615//extracellular space;GO:0031410//cytoplasmic vesicle	GO:0004869//cysteine-type endopeptidase inhibitor activity;GO:0030414//peptidase inhibitor activity	GO:0006952//defense response;GO:0010466//negative regulation of peptidase activity;GO:0010951//negative regulation of endopeptidase activity;GO:0016525//negative regulation of angiogenesis;GO:1901491//negative regulation of lymphangiogenesis
ENSMUST00000035325	107031.296875	64555.40625	129108.7421875	165961.546875	157582.296875	161456.15625	100231.815104167	161666.666666667	0.689681731981248	0.0019086978329154	0.0300990769662074	Qsox1	quiescin Q6 sulfhydryl oxidase 1 [Source:MGI Symbol;Acc:MGI:1330818]	-	-	-	-	GO:0000139//Golgi membrane;GO:0005576//extracellular region;GO:0005615//extracellular space;GO:0005623//cell;GO:0005783//endoplasmic reticulum;GO:0005794//Golgi apparatus;GO:0016020//membrane;GO:0016021//integral component of membrane;GO:0030173//integral component of Golgi membrane;GO:0043231//intracellular membrane-bounded organelle;GO:0045171//intercellular bridge;GO:0070062//extracellular exo…	GO:0003756//protein disulfide isomerase activity;GO:0016491//oxidoreductase activity;GO:0016971//flavin-linked sulfhydryl oxidase activity;GO:0016972//thiol oxidase activity;GO:0071949//FAD binding	GO:0006457//protein folding;GO:0016242//negative regulation of macroautophagy;GO:0045454//cell redox homeostasis;GO:0055114//oxidation-reduction process;GO:0085029//extracellular matrix assembly
ENSMUST00000111764	107031.296875	64555.40625	129108.7421875	165961.546875	157582.296875	161456.15625	100231.815104167	161666.666666667	0.689681731981248	0.0019086978329154	0.0300990769662074	Qsox1	quiescin Q6 sulfhydryl oxidase 1 [Source:MGI Symbol;Acc:MGI:1330818]	-	-	-	-	GO:0000139//Golgi membrane;GO:0005576//extracellular region;GO:0005615//extracellular space;GO:0005623//cell;GO:0005783//endoplasmic reticulum;GO:0005794//Golgi apparatus;GO:0016020//membrane;GO:0016021//integral component of membrane;GO:0030173//integral component of Golgi membrane;GO:0043231//intracellular membrane-bounded organelle;GO:0045171//intercellular bridge;GO:0070062//extracellular exo…	GO:0003756//protein disulfide isomerase activity;GO:0016491//oxidoreductase activity;GO:0016971//flavin-linked sulfhydryl oxidase activity;GO:0016972//thiol oxidase activity;GO:0071949//FAD binding	GO:0006457//protein folding;GO:0016242//negative regulation of macroautophagy;GO:0045454//cell redox homeostasis;GO:0055114//oxidation-reduction process;GO:0085029//extracellular matrix assembly
ENSMUST00000000608	71645.2890625	85860.0546875	114066.4765625	212853.0625	157853.109375	167791.484375	90523.9401041667	179499.21875	0.987606279718014	0.00193292987385484	0.0303240828406041	Gm2a	GM2 ganglioside activator protein [Source:MGI Symbol;Acc:MGI:95762]	Cellular Processes	Transport and catabolism	ko04142//Lysosome	K12383	GO:0005737//cytoplasm;GO:0005739//mitochondrion;GO:0005764//lysosome;GO:0009898//cytoplasmic side of plasma membrane;GO:0016323//basolateral plasma membrane;GO:0016324//apical plasma membrane	GO:0004563//beta-N-acetylhexosaminidase activity;GO:0005319//lipid transporter activity;GO:0008047//enzyme activator activity;GO:0016004//phospholipase activator activity;GO:0016787//hydrolase activity;GO:0032428//beta-N-acetylgalactosaminidase activity	GO:0001573//ganglioside metabolic process;GO:0006629//lipid metabolic process;GO:0006665//sphingolipid metabolic process;GO:0006689//ganglioside catabolic process;GO:0006869//lipid transport;GO:0007611//learning or memory;GO:0009313//oligosaccharide catabolic process;GO:0019915//lipid storage;GO:0050877//nervous system process;GO:0050885//neuromuscular process controlling balance;GO:0051345//posi…
ENSMUST00000103329	237147.40625	242718.3125	398362.3125	822539.0625	1370620.75	932744.625	292742.677083333	1041968.14583333	1.83160618596297	0.00194393051997781	0.0304182649745627	Igkv10-95	immunoglobulin kappa variable 10-95 [Source:MGI Symbol;Acc:MGI:3644598]	-	-	-	-	GO:0005615//extracellular space	-	GO:0002377//immunoglobulin production;GO:0006955//immune response
ENSMUST00000114485	1	NA	1	134216.796875	20045.970703125	22284.576171875	1	58849.1145833333	15.8447330888515	0.00202884621816372	0.0315846213042521	Il1rn	interleukin 1 receptor antagonist [Source:MGI Symbol;Acc:MGI:96547]	Environmental Information Processing	Signaling molecules and interaction	ko04060//Cytokine-cytokine receptor interaction	K05481	GO:0005576//extracellular region;GO:0005615//extracellular space	GO:0005125//cytokine activity;GO:0005149//interleukin-1 receptor binding;GO:0005152//interleukin-1 receptor antagonist activity	GO:0006954//inflammatory response;GO:0006955//immune response;GO:0007165//signal transduction;GO:2000660//negative regulation of interleukin-1-mediated signaling pathway
ENSMUST00000046091	134439.203125	138765.140625	116046.078125	32597.671875	110515.84375	108534	129750.140625	83882.5052083333	-0.629294247933146	0.00206562606357216	0.0319935517785337	Elane	elastase, neutrophil expressed [Source:MGI Symbol;Acc:MGI:2679229]	Human Diseases;Human Diseases	Cancers;Immune diseases	ko05202//Transcriptional misregulation in cancers;ko05322//Systemic lupus erythematosus	K01327;K01327	GO:0005615//extracellular space;GO:0005737//cytoplasm;GO:0009986//cell surface;GO:0017053//transcriptional repressor complex;GO:0030141//secretory granule;GO:0062023//collagen-containing extracellular matrix	GO:0002020//protease binding;GO:0003714//transcription corepressor activity;GO:0004175//endopeptidase activity;GO:0004252//serine-type endopeptidase activity;GO:0008201//heparin binding;GO:0008233//peptidase activity;GO:0008236//serine-type peptidase activity;GO:0016787//hydrolase activity;GO:0019955//cytokine binding	GO:0000122//negative regulation of transcription by RNA polymerase II;GO:0001878//response to yeast;GO:0002438//acute inflammatory response to antigenic stimulus;GO:0002523//leukocyte migration involved in inflammatory response;GO:0002812//biosynthetic process of antibacterial peptides active against Gram-negative bacteria;GO:0006508//proteolysis;GO:0006909//phagocytosis;GO:0009411//response to U…
ENSMUST00000161701	398832.375	446099.03125	324907.96875	210216.9375	290720.09375	274477.5	389946.458333333	258471.510416667	-0.593270777385811	0.00210806418137417	0.0324855358785432	Pcdh1	protocadherin 1 [Source:MGI Symbol;Acc:MGI:104692]	-	-	-	-	GO:0005654//nucleoplasm;GO:0005730//nucleolus;GO:0005886//plasma membrane;GO:0005887//integral component of plasma membrane;GO:0005911//cell-cell junction;GO:0016020//membrane;GO:0016021//integral component of membrane;GO:0030054//cell junction;GO:0043231//intracellular membrane-bounded organelle	GO:0005509//calcium ion binding;GO:0005515//protein binding	GO:0007155//cell adhesion;GO:0007156//homophilic cell adhesion via plasma membrane adhesion molecules;GO:0016339//calcium-dependent cell-cell adhesion via plasma membrane cell adhesion molecules
ENSMUST00000103328	241820.828125	309647.0625	720627.75	1141973	2456273.75	1837505.75	424031.880208333	1811917.5	2.0952726274034	0.00212951875424252	0.0326508328893557	Igkv10-96	immunoglobulin kappa variable 10-96 [Source:MGI Symbol;Acc:MGI:4439561]	-	-	-	-	GO:0005615//extracellular space	-	GO:0002377//immunoglobulin production;GO:0006955//immune response
ENSMUST00000053917	200463.671875	179285.765625	140658.59375	86482.296875	126914.2265625	102805.796875	173469.34375	105400.7734375	-0.718795272443806	0.00221623233677407	0.0337255155848593	Ccny	cyclin Y [Source:MGI Symbol;Acc:MGI:1915224]	-	-	-	-	GO:0000308//cytoplasmic cyclin-dependent protein kinase holoenzyme complex;GO:0005634//nucleus;GO:0005737//cytoplasm;GO:0005886//plasma membrane;GO:0016020//membrane	GO:0005515//protein binding;GO:0016538//cyclin-dependent protein serine/threonine kinase regulator activity;GO:0019901//protein kinase binding	GO:0000079//regulation of cyclin-dependent protein serine/threonine kinase activity;GO:0000086//G2/M transition of mitotic cell cycle;GO:0007049//cell cycle;GO:0016055//Wnt signaling pathway;GO:0045737//positive regulation of cyclin-dependent protein serine/threonine kinase activity;GO:0051301//cell division;GO:0060828//regulation of canonical Wnt signaling pathway
ENSMUST00000028106	1384857	2088896.75	1509017.375	784068.1875	1202552.25	1071188.5	1660923.70833333	1019269.64583333	-0.704450042905527	0.00223064598120366	0.0338602047071987	Itga8	integrin alpha 8 [Source:MGI Symbol;Acc:MGI:109442]	Environmental Information Processing;Human Diseases;Cellular Processes;Cellular Processes;Human Diseases;Environmental Information Processing;Environmental Information Processing;Human Diseases;Human Diseases	Signal transduction;Infectious diseases;Cell motility;Cellular community - eukaryotes;Cardiovascular diseases;Signaling molecules and interaction;Signaling molecules and interaction;Cardiovascular diseases;Cardiovascular diseases	ko04151//PI3K-Akt signaling pathway;ko05165//Human papillomavirus infection;ko04810//Regulation of actin cytoskeleton;ko04510//Focal adhesion;ko05414//Dilated cardiomyopathy (DCM);ko04514//Cell adhesion molecules (CAMs);ko04512//ECM-receptor interaction;ko05410//Hypertrophic cardiomyopathy (HCM);ko05412//Arrhythmogenic right ventricular cardiomyopathy (ARVC)	K06584;K06584;K06584;K06584;K06584;K06584;K06584;K06584;K06584	GO:0005783//endoplasmic reticulum;GO:0005886//plasma membrane;GO:0008305//integrin complex;GO:0009986//cell surface;GO:0014069//postsynaptic density;GO:0016020//membrane;GO:0016021//integral component of membrane;GO:0032591//dendritic spine membrane;GO:0043204//perikaryon;GO:0045177//apical part of cell	GO:0046872//metal ion binding	GO:0001656//metanephros development;GO:0001822//kidney development;GO:0007155//cell adhesion;GO:0007160//cell-matrix adhesion;GO:0007229//integrin-mediated signaling pathway;GO:0007275//multicellular organism development;GO:0007399//nervous system development;GO:0007420//brain development;GO:0007613//memory;GO:0030030//cell projection organization;GO:0030154//cell differentiation;GO:0030198//extr…
ENSMUST00000021539	37359.9765625	43319.50390625	29757.23828125	92546.40625	64404.25	61444.5078125	36812.2395833333	72798.3880208333	0.983720982008267	0.00223989949658562	0.0339160901385987	Vrk1	vaccinia related kinase 1 [Source:MGI Symbol;Acc:MGI:1261847]	-	-	-	-	GO:0005634//nucleus;GO:0005654//nucleoplasm;GO:0005730//nucleolus;GO:0005737//cytoplasm;GO:0005795//Golgi stack;GO:0005819//spindle;GO:0005829//cytosol;GO:0005856//cytoskeleton	GO:0000166//nucleotide binding;GO:0004672//protein kinase activity;GO:0004674//protein serine/threonine kinase activity;GO:0005524//ATP binding;GO:0016301//kinase activity;GO:0016740//transferase activity;GO:0019901//protein kinase binding;GO:0031493//nucleosomal histone binding;GO:0035175//histone kinase activity (H3-S10 specific);GO:0072354//histone kinase activity (H3-T3 specific)	GO:0006468//protein phosphorylation;GO:0007049//cell cycle;GO:0016055//Wnt signaling pathway;GO:0016310//phosphorylation;GO:0018105//peptidyl-serine phosphorylation;GO:0043987//histone H3-S10 phosphorylation;GO:0046777//protein autophosphorylation;GO:0051301//cell division;GO:0072355//histone H3-T3 phosphorylation;GO:0090166//Golgi disassembly
ENSMUST00000072040	37359.9765625	43319.50390625	29757.23828125	92546.40625	64404.25	61444.5078125	36812.2395833333	72798.3880208333	0.983720982008267	0.00223989949658562	0.0339160901385987	Vrk1	vaccinia related kinase 1 [Source:MGI Symbol;Acc:MGI:1261847]	-	-	-	-	GO:0005634//nucleus;GO:0005654//nucleoplasm;GO:0005730//nucleolus;GO:0005737//cytoplasm;GO:0005795//Golgi stack;GO:0005819//spindle;GO:0005829//cytosol;GO:0005856//cytoskeleton	GO:0000166//nucleotide binding;GO:0004672//protein kinase activity;GO:0004674//protein serine/threonine kinase activity;GO:0005524//ATP binding;GO:0016301//kinase activity;GO:0016740//transferase activity;GO:0019901//protein kinase binding;GO:0031493//nucleosomal histone binding;GO:0035175//histone kinase activity (H3-S10 specific);GO:0072354//histone kinase activity (H3-T3 specific)	GO:0006468//protein phosphorylation;GO:0007049//cell cycle;GO:0016055//Wnt signaling pathway;GO:0016310//phosphorylation;GO:0018105//peptidyl-serine phosphorylation;GO:0043987//histone H3-S10 phosphorylation;GO:0046777//protein autophosphorylation;GO:0051301//cell division;GO:0072355//histone H3-T3 phosphorylation;GO:0090166//Golgi disassembly
ENSMUST00000085026	37359.9765625	43319.50390625	29757.23828125	92546.40625	64404.25	61444.5078125	36812.2395833333	72798.3880208333	0.983720982008267	0.00223989949658562	0.0339160901385987	Vrk1	vaccinia related kinase 1 [Source:MGI Symbol;Acc:MGI:1261847]	-	-	-	-	GO:0005634//nucleus;GO:0005654//nucleoplasm;GO:0005730//nucleolus;GO:0005737//cytoplasm;GO:0005795//Golgi stack;GO:0005819//spindle;GO:0005829//cytosol;GO:0005856//cytoskeleton	GO:0000166//nucleotide binding;GO:0004672//protein kinase activity;GO:0004674//protein serine/threonine kinase activity;GO:0005524//ATP binding;GO:0016301//kinase activity;GO:0016740//transferase activity;GO:0019901//protein kinase binding;GO:0031493//nucleosomal histone binding;GO:0035175//histone kinase activity (H3-S10 specific);GO:0072354//histone kinase activity (H3-T3 specific)	GO:0006468//protein phosphorylation;GO:0007049//cell cycle;GO:0016055//Wnt signaling pathway;GO:0016310//phosphorylation;GO:0018105//peptidyl-serine phosphorylation;GO:0043987//histone H3-S10 phosphorylation;GO:0046777//protein autophosphorylation;GO:0051301//cell division;GO:0072355//histone H3-T3 phosphorylation;GO:0090166//Golgi disassembly
ENSMUST00000220629	37359.9765625	43319.50390625	29757.23828125	92546.40625	64404.25	61444.5078125	36812.2395833333	72798.3880208333	0.983720982008267	0.00223989949658562	0.0339160901385987	Vrk1	vaccinia related kinase 1 [Source:MGI Symbol;Acc:MGI:1261847]	-	-	-	-	GO:0005634//nucleus;GO:0005654//nucleoplasm;GO:0005730//nucleolus;GO:0005737//cytoplasm;GO:0005795//Golgi stack;GO:0005819//spindle;GO:0005829//cytosol;GO:0005856//cytoskeleton	GO:0000166//nucleotide binding;GO:0004672//protein kinase activity;GO:0004674//protein serine/threonine kinase activity;GO:0005524//ATP binding;GO:0016301//kinase activity;GO:0016740//transferase activity;GO:0019901//protein kinase binding;GO:0031493//nucleosomal histone binding;GO:0035175//histone kinase activity (H3-S10 specific);GO:0072354//histone kinase activity (H3-T3 specific)	GO:0006468//protein phosphorylation;GO:0007049//cell cycle;GO:0016055//Wnt signaling pathway;GO:0016310//phosphorylation;GO:0018105//peptidyl-serine phosphorylation;GO:0043987//histone H3-S10 phosphorylation;GO:0046777//protein autophosphorylation;GO:0051301//cell division;GO:0072355//histone H3-T3 phosphorylation;GO:0090166//Golgi disassembly
ENSMUST00000221312	37359.9765625	43319.50390625	29757.23828125	92546.40625	64404.25	61444.5078125	36812.2395833333	72798.3880208333	0.983720982008267	0.00223989949658562	0.0339160901385987	Vrk1	vaccinia related kinase 1 [Source:MGI Symbol;Acc:MGI:1261847]	-	-	-	-	-	GO:0000166//nucleotide binding;GO:0004672//protein kinase activity;GO:0004674//protein serine/threonine kinase activity;GO:0005524//ATP binding	GO:0006468//protein phosphorylation
ENSMUST00000080932	2950720	4647044.5	2847646.75	1796929.625	1428580.375	1069002.375	3481803.75	1431504.125	-1.28230306095797	0.00225056477486565	0.0339930217980328	Fes	feline sarcoma oncogene [Source:MGI Symbol;Acc:MGI:95514]	Organismal Systems	Development	ko04360//Axon guidance	K07527	GO:0005737//cytoplasm;GO:0005794//Golgi apparatus;GO:0005829//cytosol;GO:0005856//cytoskeleton;GO:0005886//plasma membrane;GO:0005925//focal adhesion;GO:0015630//microtubule cytoskeleton;GO:0016020//membrane;GO:0030054//cell junction;GO:0031234//extrinsic component of cytoplasmic side of plasma membrane;GO:0031410//cytoplasmic vesicle	GO:0000166//nucleotide binding;GO:0004672//protein kinase activity;GO:0004713//protein tyrosine kinase activity;GO:0004715//non-membrane spanning protein tyrosine kinase activity;GO:0005102//signaling receptor binding;GO:0005515//protein binding;GO:0005524//ATP binding;GO:0008017//microtubule binding;GO:0008289//lipid binding;GO:0016301//kinase activity;GO:0016740//transferase activity;GO:0034987…	GO:0001578//microtubule bundle formation;GO:0006468//protein phosphorylation;GO:0006935//chemotaxis;GO:0007098//centrosome cycle;GO:0007155//cell adhesion;GO:0007169//transmembrane receptor protein tyrosine kinase signaling pathway;GO:0008360//regulation of cell shape;GO:0010976//positive regulation of neuron projection development;GO:0016310//phosphorylation;GO:0016477//cell migration;GO:0018108…
ENSMUST00000206728	2950720	4647044.5	2847646.75	1796929.625	1428580.375	1069002.375	3481803.75	1431504.125	-1.28230306095797	0.00225056477486565	0.0339930217980328	Fes	feline sarcoma oncogene [Source:MGI Symbol;Acc:MGI:95514]	Organismal Systems	Development	ko04360//Axon guidance	K07527	GO:0005737//cytoplasm;GO:0005856//cytoskeleton	GO:0000166//nucleotide binding;GO:0004672//protein kinase activity;GO:0004713//protein tyrosine kinase activity;GO:0004715//non-membrane spanning protein tyrosine kinase activity;GO:0005524//ATP binding;GO:0016301//kinase activity;GO:0016740//transferase activity	GO:0006468//protein phosphorylation;GO:0016310//phosphorylation;GO:0018108//peptidyl-tyrosine phosphorylation
ENSMUST00000032573	133452.421875	133543.90625	272148.21875	553221.9375	294728.53125	504701.25	179714.848958333	450883.90625	1.32704639905562	0.00236517659847544	0.035373046572285	Pglyrp1	peptidoglycan recognition protein 1 [Source:MGI Symbol;Acc:MGI:1345092]	-	-	-	-	GO:0005576//extracellular region;GO:0005615//extracellular space;GO:0005737//cytoplasm	GO:0005125//cytokine activity;GO:0008270//zinc ion binding;GO:0008745//N-acetylmuramoyl-L-alanine amidase activity;GO:0016019//peptidoglycan receptor activity;GO:0042834//peptidoglycan binding	GO:0002376//immune system process;GO:0006915//apoptotic process;GO:0007165//signal transduction;GO:0009253//peptidoglycan catabolic process;GO:0009617//response to bacterium;GO:0016045//detection of bacterium;GO:0031640//killing of cells of other organism;GO:0032689//negative regulation of interferon-gamma production;GO:0032827//negative regulation of natural killer cell differentiation involved …
ENSMUST00000023587	225404.171875	203704.46875	318002.9375	363131.125	602449.1875	423576.46875	249037.192708333	463052.260416667	0.894813807175334	0.00240750307592907	0.035742612739464	Fetub	fetuin beta [Source:MGI Symbol;Acc:MGI:1890221]	-	-	-	-	GO:0005576//extracellular region;GO:0005615//extracellular space	GO:0004857//enzyme inhibitor activity;GO:0004866//endopeptidase inhibitor activity;GO:0004869//cysteine-type endopeptidase inhibitor activity;GO:0008191//metalloendopeptidase inhibitor activity;GO:0030414//peptidase inhibitor activity	GO:0007338//single fertilization;GO:0007339//binding of sperm to zona pellucida;GO:0010466//negative regulation of peptidase activity;GO:0010951//negative regulation of endopeptidase activity
ENSMUST00000167399	225404.171875	203704.46875	318002.9375	363131.125	602449.1875	423576.46875	249037.192708333	463052.260416667	0.894813807175334	0.00240750307592907	0.035742612739464	Fetub	fetuin beta [Source:MGI Symbol;Acc:MGI:1890221]	-	-	-	-	GO:0005576//extracellular region;GO:0005615//extracellular space	GO:0004857//enzyme inhibitor activity;GO:0004866//endopeptidase inhibitor activity;GO:0004869//cysteine-type endopeptidase inhibitor activity;GO:0008191//metalloendopeptidase inhibitor activity;GO:0030414//peptidase inhibitor activity	GO:0007338//single fertilization;GO:0007339//binding of sperm to zona pellucida;GO:0010466//negative regulation of peptidase activity;GO:0010951//negative regulation of endopeptidase activity
ENSMUST00000170805	225404.171875	203704.46875	318002.9375	363131.125	602449.1875	423576.46875	249037.192708333	463052.260416667	0.894813807175334	0.00240750307592907	0.035742612739464	Fetub	fetuin beta [Source:MGI Symbol;Acc:MGI:1890221]	-	-	-	-	GO:0005576//extracellular region;GO:0005615//extracellular space	GO:0004857//enzyme inhibitor activity;GO:0004866//endopeptidase inhibitor activity;GO:0004869//cysteine-type endopeptidase inhibitor activity;GO:0008191//metalloendopeptidase inhibitor activity;GO:0030414//peptidase inhibitor activity	GO:0007338//single fertilization;GO:0007339//binding of sperm to zona pellucida;GO:0010466//negative regulation of peptidase activity;GO:0010951//negative regulation of endopeptidase activity
ENSMUST00000231768	225404.171875	203704.46875	318002.9375	363131.125	602449.1875	423576.46875	249037.192708333	463052.260416667	0.894813807175334	0.00240750307592907	0.035742612739464	Fetub	fetuin beta [Source:MGI Symbol;Acc:MGI:1890221]	-	-	-	-	GO:0005576//extracellular region;GO:0005615//extracellular space	GO:0004857//enzyme inhibitor activity;GO:0004866//endopeptidase inhibitor activity;GO:0004869//cysteine-type endopeptidase inhibitor activity;GO:0008191//metalloendopeptidase inhibitor activity;GO:0030414//peptidase inhibitor activity	GO:0007338//single fertilization;GO:0007339//binding of sperm to zona pellucida;GO:0010466//negative regulation of peptidase activity;GO:0010951//negative regulation of endopeptidase activity
ENSMUST00000232097	225404.171875	203704.46875	318002.9375	363131.125	602449.1875	423576.46875	249037.192708333	463052.260416667	0.894813807175334	0.00240750307592907	0.035742612739464	Fetub	fetuin beta [Source:MGI Symbol;Acc:MGI:1890221]	-	-	-	-	GO:0005576//extracellular region;GO:0005615//extracellular space	GO:0004857//enzyme inhibitor activity;GO:0004866//endopeptidase inhibitor activity;GO:0004869//cysteine-type endopeptidase inhibitor activity;GO:0008191//metalloendopeptidase inhibitor activity;GO:0030414//peptidase inhibitor activity	GO:0007338//single fertilization;GO:0007339//binding of sperm to zona pellucida;GO:0010466//negative regulation of peptidase activity;GO:0010951//negative regulation of endopeptidase activity
ENSMUST00000109641	246712.6875	276730.09375	308268.78125	516677.875	361642.0625	470973.5625	277237.1875	449764.5	0.698049005544789	0.0024611334435768	0.0364499252337032	Sec61g	SEC61, gamma subunit [Source:MGI Symbol;Acc:MGI:1202066]	Cellular Processes;Genetic Information Processing;Genetic Information Processing	Transport and catabolism;Folding, sorting and degradation;Folding, sorting and degradation	ko04145//Phagosome;ko04141//Protein processing in endoplasmic reticulum;ko03060//Protein export	K07342;K07342;K07342	GO:0005783//endoplasmic reticulum;GO:0005789//endoplasmic reticulum membrane;GO:0016020//membrane;GO:0016021//integral component of membrane	GO:0003674//molecular_function;GO:0015450//P-P-bond-hydrolysis-driven protein transmembrane transporter activity	GO:0006605//protein targeting;GO:0006886//intracellular protein transport;GO:0008150//biological_process;GO:0015031//protein transport;GO:0071806//protein transmembrane transport
ENSMUST00000109642	246712.6875	276730.09375	308268.78125	516677.875	361642.0625	470973.5625	277237.1875	449764.5	0.698049005544789	0.0024611334435768	0.0364499252337032	Sec61g	SEC61, gamma subunit [Source:MGI Symbol;Acc:MGI:1202066]	Cellular Processes;Genetic Information Processing;Genetic Information Processing	Transport and catabolism;Folding, sorting and degradation;Folding, sorting and degradation	ko04145//Phagosome;ko04141//Protein processing in endoplasmic reticulum;ko03060//Protein export	K07342;K07342;K07342	GO:0005783//endoplasmic reticulum;GO:0005789//endoplasmic reticulum membrane;GO:0016020//membrane;GO:0016021//integral component of membrane	GO:0003674//molecular_function;GO:0015450//P-P-bond-hydrolysis-driven protein transmembrane transporter activity	GO:0006605//protein targeting;GO:0006886//intracellular protein transport;GO:0008150//biological_process;GO:0015031//protein transport;GO:0071806//protein transmembrane transport
ENSMUST00000109643	246712.6875	276730.09375	308268.78125	516677.875	361642.0625	470973.5625	277237.1875	449764.5	0.698049005544789	0.0024611334435768	0.0364499252337032	Sec61g	SEC61, gamma subunit [Source:MGI Symbol;Acc:MGI:1202066]	Cellular Processes;Genetic Information Processing;Genetic Information Processing	Transport and catabolism;Folding, sorting and degradation;Folding, sorting and degradation	ko04145//Phagosome;ko04141//Protein processing in endoplasmic reticulum;ko03060//Protein export	K07342;K07342;K07342	GO:0005783//endoplasmic reticulum;GO:0005789//endoplasmic reticulum membrane;GO:0016020//membrane;GO:0016021//integral component of membrane	GO:0003674//molecular_function;GO:0015450//P-P-bond-hydrolysis-driven protein transmembrane transporter activity	GO:0006605//protein targeting;GO:0006886//intracellular protein transport;GO:0008150//biological_process;GO:0015031//protein transport;GO:0071806//protein transmembrane transport
ENSMUST00000178855	246712.6875	276730.09375	308268.78125	516677.875	361642.0625	470973.5625	277237.1875	449764.5	0.698049005544789	0.0024611334435768	0.0364499252337032	Sec61g	SEC61, gamma subunit [Source:MGI Symbol;Acc:MGI:1202066]	Cellular Processes;Genetic Information Processing;Genetic Information Processing	Transport and catabolism;Folding, sorting and degradation;Folding, sorting and degradation	ko04145//Phagosome;ko04141//Protein processing in endoplasmic reticulum;ko03060//Protein export	K07342;K07342;K07342	GO:0005783//endoplasmic reticulum;GO:0005789//endoplasmic reticulum membrane;GO:0016020//membrane;GO:0016021//integral component of membrane	GO:0003674//molecular_function;GO:0015450//P-P-bond-hydrolysis-driven protein transmembrane transporter activity	GO:0006605//protein targeting;GO:0006886//intracellular protein transport;GO:0008150//biological_process;GO:0015031//protein transport;GO:0071806//protein transmembrane transport
ENSMUST00000028938	202463.65625	226842.109375	229803.46875	330890.9375	269058.625	414329.5	219703.078125	338093.020833333	0.621865152740934	0.0025442733465464	0.03749876963784	Cst3	cystatin C [Source:MGI Symbol;Acc:MGI:102519]	Organismal Systems	Digestive system	ko04970//Salivary secretion	K13899	GO:0005576//extracellular region;GO:0005604//basement membrane;GO:0005615//extracellular space;GO:0005737//cytoplasm;GO:0005764//lysosome;GO:0005771//multivesicular body;GO:0005783//endoplasmic reticulum;GO:0005794//Golgi apparatus;GO:0005886//plasma membrane;GO:0030424//axon;GO:0031965//nuclear membrane;GO:0031982//vesicle;GO:0042995//cell projection;GO:0043025//neuronal cell body;GO:0043292//co…	GO:0001540//amyloid-beta binding;GO:0002020//protease binding;GO:0004866//endopeptidase inhibitor activity;GO:0004869//cysteine-type endopeptidase inhibitor activity;GO:0030414//peptidase inhibitor activity;GO:0042802//identical protein binding	GO:0001654//eye development;GO:0001666//response to hypoxia;GO:0001775//cell activation;GO:0006915//apoptotic process;GO:0006952//defense response;GO:0006979//response to oxidative stress;GO:0007420//brain development;GO:0007431//salivary gland development;GO:0007566//embryo implantation;GO:0008284//positive regulation of cell proliferation;GO:0008584//male gonad development;GO:0009636//response …
ENSMUST00000026586	28748.70703125	17233.396484375	11144.8642578125	62611.62109375	40829.90625	81902.1484375	19042.3225911458	61781.2252604167	1.69795902831042	0.00263554074177846	0.0385824395332615	Chid1	chitinase domain containing 1 [Source:MGI Symbol;Acc:MGI:1915288]	-	-	-	-	-	GO:0008061//chitin binding	-
ENSMUST00000118694	28748.70703125	17233.396484375	11144.8642578125	62611.62109375	40829.90625	81902.1484375	19042.3225911458	61781.2252604167	1.69795902831042	0.00263554074177846	0.0385824395332615	Chid1	chitinase domain containing 1 [Source:MGI Symbol;Acc:MGI:1915288]	-	-	-	-	GO:0005576//extracellular region;GO:0005615//extracellular space;GO:0005764//lysosome;GO:0005770//late endosome;GO:0005802//trans-Golgi network	GO:0008061//chitin binding;GO:0070492//oligosaccharide binding	GO:0002376//immune system process;GO:0005975//carbohydrate metabolic process;GO:0045087//innate immune response;GO:1900016//negative regulation of cytokine production involved in inflammatory response
ENSMUST00000153191	28748.70703125	17233.396484375	11144.8642578125	62611.62109375	40829.90625	81902.1484375	19042.3225911458	61781.2252604167	1.69795902831042	0.00263554074177846	0.0385824395332615	Chid1	chitinase domain containing 1 [Source:MGI Symbol;Acc:MGI:1915288]	-	-	-	-	GO:0005576//extracellular region;GO:0005615//extracellular space;GO:0005764//lysosome;GO:0005770//late endosome;GO:0005802//trans-Golgi network	GO:0008061//chitin binding;GO:0070492//oligosaccharide binding	GO:0002376//immune system process;GO:0005975//carbohydrate metabolic process;GO:0045087//innate immune response;GO:1900016//negative regulation of cytokine production involved in inflammatory response
ENSMUST00000166082	28748.70703125	17233.396484375	11144.8642578125	62611.62109375	40829.90625	81902.1484375	19042.3225911458	61781.2252604167	1.69795902831042	0.00263554074177846	0.0385824395332615	Chid1	chitinase domain containing 1 [Source:MGI Symbol;Acc:MGI:1915288]	-	-	-	-	GO:0005615//extracellular space;GO:0005764//lysosome;GO:0005770//late endosome;GO:0005802//trans-Golgi network	GO:0008061//chitin binding;GO:0070492//oligosaccharide binding	GO:0005975//carbohydrate metabolic process;GO:1900016//negative regulation of cytokine production involved in inflammatory response
ENSMUST00000065666	283455.03125	274222.59375	332081.03125	462011.375	429108.6875	562136.0625	296586.21875	484418.708333333	0.707803020518758	0.00278701684777425	0.0403918370295282	Retnlg	resistin like gamma [Source:MGI Symbol;Acc:MGI:2667763]	-	-	-	-	GO:0005576//extracellular region;GO:0005615//extracellular space	GO:0005179//hormone activity	GO:0002408//myeloid dendritic cell chemotaxis;GO:0007165//signal transduction
ENSMUST00000040828	1664527.125	1400108.875	1505856.5	3422311.5	2268316.5	3216152.75	1523497.5	2968926.91666667	0.962554447649546	0.00285727341478807	0.0412137992317891	H2-Ab1	histocompatibility 2, class II antigen A, beta 1 [Source:MGI Symbol;Acc:MGI:103070]	Human Diseases;Human Diseases;Human Diseases;Cellular Processes;Human Diseases;Human Diseases;Human Diseases;Human Diseases;Human Diseases;Organismal Systems;Human Diseases;Environmental Information Processing;Human Diseases;Human Diseases;Organismal Systems;Human Diseases;Human Diseases;Organismal Systems;Human Diseases;Organismal Systems;Organismal Systems;Human Diseases;Human Diseases;Human Di…	Infectious diseases;Infectious diseases;Infectious diseases;Transport and catabolism;Infectious diseases;Immune diseases;Infectious diseases;Cardiovascular diseases;Infectious diseases;Immune system;Infectious diseases;Signaling molecules and interaction;Immune diseases;Infectious diseases;Immune system;Immune diseases;Immune diseases;Immune system;Immune diseases;Immune system;Immune system;Immu…	ko05169//Epstein-Barr virus infection;ko05152//Tuberculosis;ko05168//Herpes simplex infection;ko04145//Phagosome;ko05166//HTLV-I infection;ko05322//Systemic lupus erythematosus;ko05164//Influenza A;ko05416//Viral myocarditis;ko05145//Toxoplasmosis;ko04640//Hematopoietic cell lineage;ko05140//Leishmaniasis;ko04514//Cell adhesion molecules (CAMs);ko05323//Rheumatoid arthritis;ko05150//Staphylococcu…	K06752;K06752;K06752;K06752;K06752;K06752;K06752;K06752;K06752;K06752;K06752;K06752;K06752;K06752;K06752;K06752;K06752;K06752;K06752;K06752;K06752;K06752;K06752;K06752	GO:0005769//early endosome;GO:0005771//multivesicular body;GO:0005794//Golgi apparatus;GO:0005886//plasma membrane;GO:0009897//external side of plasma membrane;GO:0009986//cell surface;GO:0016020//membrane;GO:0016021//integral component of membrane;GO:0042613//MHC class II protein complex	GO:0005515//protein binding;GO:0008134//transcription factor binding;GO:0015643//toxic substance binding;GO:0031625//ubiquitin protein ligase binding;GO:0042605//peptide antigen binding;GO:0044877//protein-containing complex binding;GO:1990405//protein antigen binding	GO:0002250//adaptive immune response;GO:0002344//B cell affinity maturation;GO:0002376//immune system process;GO:0002381//immunoglobulin production involved in immunoglobulin mediated immune response;GO:0002455//humoral immune response mediated by circulating immunoglobulin;GO:0002504//antigen processing and presentation of peptide or polysaccharide antigen via MHC class II;GO:0002579//positive r…
ENSMUST00000108775	3517.18505859375	155430.640625	132392.421875	90059.4765625	1	1	97113.4158528646	30020.4921875	-1.69372298209054	0.0029513773330103	0.0423703627972493	Sipa1l2	signal-induced proliferation-associated 1 like 2 [Source:MGI Symbol;Acc:MGI:2676970]	Environmental Information Processing	Signal transduction	ko04015//Rap1 signaling pathway	K17702	GO:0005575//cellular_component	GO:0003674//molecular_function;GO:0005096//GTPase activator activity;GO:0005515//protein binding	GO:0008150//biological_process;GO:0043547//positive regulation of GTPase activity;GO:0051056//regulation of small GTPase mediated signal transduction
ENSMUST00000212168	3517.18505859375	155430.640625	132392.421875	90059.4765625	1	1	97113.4158528646	30020.4921875	-1.69372298209054	0.0029513773330103	0.0423703627972493	Sipa1l2	signal-induced proliferation-associated 1 like 2 [Source:MGI Symbol;Acc:MGI:2676970]	Environmental Information Processing	Signal transduction	ko04015//Rap1 signaling pathway	K17702	-	GO:0005096//GTPase activator activity;GO:0005515//protein binding	GO:0043547//positive regulation of GTPase activity;GO:0051056//regulation of small GTPase mediated signal transduction
ENSMUST00000212987	3517.18505859375	155430.640625	132392.421875	90059.4765625	1	1	97113.4158528646	30020.4921875	-1.69372298209054	0.0029513773330103	0.0423703627972493	Sipa1l2	signal-induced proliferation-associated 1 like 2 [Source:MGI Symbol;Acc:MGI:2676970]	Environmental Information Processing	Signal transduction	ko04015//Rap1 signaling pathway	K17702	GO:0005575//cellular_component	GO:0003674//molecular_function;GO:0005096//GTPase activator activity;GO:0005515//protein binding	GO:0008150//biological_process;GO:0043547//positive regulation of GTPase activity;GO:0051056//regulation of small GTPase mediated signal transduction
ENSMUST00000103377	62246.40625	265492.59375	269018.84375	683693.3125	2018761.25	323358.4375	198919.28125	1008604.33333333	2.34210530024514	0.00301056258215119	0.0427163040502432	Igkv6-32	immunoglobulin kappa variable 6-32 [Source:MGI Symbol;Acc:MGI:3641634]	-	-	-	-	GO:0005615//extracellular space	-	GO:0002377//immunoglobulin production;GO:0006955//immune response
ENSMUST00000006626	66303.4140625	8152.78271484375	9692.9912109375	83433.7890625	23580.51953125	117838.109375	28049.7293294271	74950.8059895833	1.41795714302172	0.00305090860806774	0.0430313346572346	Actn3	actinin alpha 3 [Source:MGI Symbol;Acc:MGI:99678]	Human Diseases	Cardiovascular diseases	ko05412//Arrhythmogenic right ventricular cardiomyopathy (ARVC)	K21073	GO:0005865//striated muscle thin filament;GO:0005903//brush border;GO:0030017//sarcomere;GO:0030018//Z disc	GO:0003779//actin binding;GO:0005509//calcium ion binding;GO:0005515//protein binding;GO:0030674//protein binding, bridging;GO:0046872//metal ion binding;GO:0051015//actin filament binding	GO:0006936//muscle contraction;GO:0014728//regulation of the force of skeletal muscle contraction;GO:0014732//skeletal muscle atrophy;GO:0014883//transition between fast and slow fiber;GO:0014894//response to denervation involved in regulation of muscle adaptation;GO:0031448//positive regulation of fast-twitch skeletal muscle fiber contraction;GO:0045820//negative regulation of glycolytic process…
ENSMUST00000103391	133823.46875	96532.25	505464.65625	482579.25	922323.8125	431475.5625	245273.458333333	612126.208333333	1.31943801417702	0.00305397347986288	0.0430313346572346	Igkv6-17	immunoglobulin kappa variable 6-17 [Source:MGI Symbol;Acc:MGI:1330833]	-	-	-	-	-	-	-
ENSMUST00000066863	119245.2578125	91035.3984375	95434.9453125	236818.4375	281031.3125	208361.59375	101905.200520833	242070.447916667	1.24819928680712	0.00312463441546818	0.043623049740722	Pfkfb2	6-phosphofructo-2-kinase/fructose-2,6-biphosphatase 2 [Source:MGI Symbol;Acc:MGI:107815]	Metabolism;Organismal Systems;Environmental Information Processing;Metabolism	Global and overview maps;Endocrine system;Signal transduction;Carbohydrate metabolism	ko01100//Metabolic pathways;ko04919//Thyroid hormone signaling pathway;ko04152//AMPK signaling pathway;ko00051//Fructose and mannose metabolism	K19029;K19029;K19029;K19029	-	GO:0003824//catalytic activity;GO:0003873//6-phosphofructo-2-kinase activity;GO:0005524//ATP binding;GO:0016301//kinase activity	GO:0006000//fructose metabolic process;GO:0006003//fructose 2,6-bisphosphate metabolic process;GO:0016310//phosphorylation;GO:0046835//carbohydrate phosphorylation
ENSMUST00000169659	119245.2578125	91035.3984375	95434.9453125	236818.4375	281031.3125	208361.59375	101905.200520833	242070.447916667	1.24819928680712	0.00312463441546818	0.043623049740722	Pfkfb2	6-phosphofructo-2-kinase/fructose-2,6-biphosphatase 2 [Source:MGI Symbol;Acc:MGI:107815]	Metabolism;Organismal Systems;Environmental Information Processing;Metabolism	Global and overview maps;Endocrine system;Signal transduction;Carbohydrate metabolism	ko01100//Metabolic pathways;ko04919//Thyroid hormone signaling pathway;ko04152//AMPK signaling pathway;ko00051//Fructose and mannose metabolism	K19029;K19029;K19029;K19029	-	GO:0003824//catalytic activity;GO:0003873//6-phosphofructo-2-kinase activity;GO:0005524//ATP binding;GO:0016301//kinase activity	GO:0006000//fructose metabolic process;GO:0006003//fructose 2,6-bisphosphate metabolic process;GO:0016310//phosphorylation;GO:0046835//carbohydrate phosphorylation
ENSMUST00000171479	119245.2578125	91035.3984375	95434.9453125	236818.4375	281031.3125	208361.59375	101905.200520833	242070.447916667	1.24819928680712	0.00312463441546818	0.043623049740722	Pfkfb2	6-phosphofructo-2-kinase/fructose-2,6-biphosphatase 2 [Source:MGI Symbol;Acc:MGI:107815]	Metabolism;Organismal Systems;Environmental Information Processing;Metabolism	Global and overview maps;Endocrine system;Signal transduction;Carbohydrate metabolism	ko01100//Metabolic pathways;ko04919//Thyroid hormone signaling pathway;ko04152//AMPK signaling pathway;ko00051//Fructose and mannose metabolism	K19029;K19029;K19029;K19029	-	GO:0003824//catalytic activity;GO:0003873//6-phosphofructo-2-kinase activity;GO:0005524//ATP binding;GO:0016301//kinase activity;GO:0016740//transferase activity	GO:0006000//fructose metabolic process;GO:0006003//fructose 2,6-bisphosphate metabolic process;GO:0016310//phosphorylation;GO:0046835//carbohydrate phosphorylation
ENSMUST00000185233	119245.2578125	91035.3984375	95434.9453125	236818.4375	281031.3125	208361.59375	101905.200520833	242070.447916667	1.24819928680712	0.00312463441546818	0.043623049740722	Pfkfb2	6-phosphofructo-2-kinase/fructose-2,6-biphosphatase 2 [Source:MGI Symbol;Acc:MGI:107815]	Metabolism;Organismal Systems;Environmental Information Processing;Metabolism	Global and overview maps;Endocrine system;Signal transduction;Carbohydrate metabolism	ko01100//Metabolic pathways;ko04919//Thyroid hormone signaling pathway;ko04152//AMPK signaling pathway;ko00051//Fructose and mannose metabolism	K19029;K19029;K19029;K19029	-	GO:0003824//catalytic activity;GO:0003873//6-phosphofructo-2-kinase activity;GO:0005524//ATP binding;GO:0016301//kinase activity	GO:0006000//fructose metabolic process;GO:0006003//fructose 2,6-bisphosphate metabolic process;GO:0016310//phosphorylation;GO:0046835//carbohydrate phosphorylation
ENSMUST00000187089	119245.2578125	91035.3984375	95434.9453125	236818.4375	281031.3125	208361.59375	101905.200520833	242070.447916667	1.24819928680712	0.00312463441546818	0.043623049740722	Pfkfb2	6-phosphofructo-2-kinase/fructose-2,6-biphosphatase 2 [Source:MGI Symbol;Acc:MGI:107815]	Metabolism;Organismal Systems;Environmental Information Processing;Metabolism	Global and overview maps;Endocrine system;Signal transduction;Carbohydrate metabolism	ko01100//Metabolic pathways;ko04919//Thyroid hormone signaling pathway;ko04152//AMPK signaling pathway;ko00051//Fructose and mannose metabolism	K19029;K19029;K19029;K19029	-	GO:0003824//catalytic activity;GO:0003873//6-phosphofructo-2-kinase activity;GO:0005524//ATP binding	GO:0006000//fructose metabolic process;GO:0006003//fructose 2,6-bisphosphate metabolic process;GO:0046835//carbohydrate phosphorylation
ENSMUST00000189534	119245.2578125	91035.3984375	95434.9453125	236818.4375	281031.3125	208361.59375	101905.200520833	242070.447916667	1.24819928680712	0.00312463441546818	0.043623049740722	Pfkfb2	6-phosphofructo-2-kinase/fructose-2,6-biphosphatase 2 [Source:MGI Symbol;Acc:MGI:107815]	Metabolism;Organismal Systems;Environmental Information Processing;Metabolism	Global and overview maps;Endocrine system;Signal transduction;Carbohydrate metabolism	ko01100//Metabolic pathways;ko04919//Thyroid hormone signaling pathway;ko04152//AMPK signaling pathway;ko00051//Fructose and mannose metabolism	K19029;K19029;K19029;K19029	-	GO:0003824//catalytic activity;GO:0003873//6-phosphofructo-2-kinase activity;GO:0005524//ATP binding;GO:0016301//kinase activity;GO:0016740//transferase activity	GO:0006000//fructose metabolic process;GO:0006003//fructose 2,6-bisphosphate metabolic process;GO:0016310//phosphorylation;GO:0046835//carbohydrate phosphorylation
ENSMUST00000191347	119245.2578125	91035.3984375	95434.9453125	236818.4375	281031.3125	208361.59375	101905.200520833	242070.447916667	1.24819928680712	0.00312463441546818	0.043623049740722	Pfkfb2	6-phosphofructo-2-kinase/fructose-2,6-biphosphatase 2 [Source:MGI Symbol;Acc:MGI:107815]	Metabolism;Organismal Systems;Environmental Information Processing;Metabolism	Global and overview maps;Endocrine system;Signal transduction;Carbohydrate metabolism	ko01100//Metabolic pathways;ko04919//Thyroid hormone signaling pathway;ko04152//AMPK signaling pathway;ko00051//Fructose and mannose metabolism	K19029;K19029;K19029;K19029	-	GO:0003824//catalytic activity;GO:0003873//6-phosphofructo-2-kinase activity;GO:0005524//ATP binding	GO:0006000//fructose metabolic process;GO:0006003//fructose 2,6-bisphosphate metabolic process;GO:0046835//carbohydrate phosphorylation
ENSMUST00000089027	78055.2265625	147652.484375	119425.78125	169614.53125	138776.109375	211244.984375	115044.497395833	173211.875	0.590345860460237	0.0032910630100298	0.0451186949145301	Tm9sf4	transmembrane 9 superfamily protein member 4 [Source:MGI Symbol;Acc:MGI:2139220]	-	-	-	-	GO:0005623//cell;GO:0005768//endosome;GO:0005769//early endosome;GO:0005794//Golgi apparatus;GO:0016020//membrane;GO:0016021//integral component of membrane	GO:0003674//molecular_function	GO:0001666//response to hypoxia;GO:0006909//phagocytosis;GO:0007155//cell adhesion;GO:0051453//regulation of intracellular pH;GO:0070072//vacuolar proton-transporting V-type ATPase complex assembly;GO:0070863//positive regulation of protein exit from endoplasmic reticulum;GO:0072657//protein localization to membrane;GO:2000010//positive regulation of protein localization to cell surface
ENSMUST00000002640	35936.62890625	2748.09741210938	22802.62109375	104857.5234375	88286.8046875	60965.17578125	20495.7824707031	84703.16796875	2.04708885953888	0.00330447216325314	0.0452007237252177	Scin	scinderin [Source:MGI Symbol;Acc:MGI:1306794]	Human Diseases;Cellular Processes;Organismal Systems	Cancers;Cell motility;Immune system	ko05203//Viral carcinogenesis;ko04810//Regulation of actin cytoskeleton;ko04666//Fc gamma R-mediated phagocytosis	K05768;K05768;K05768	GO:0002102//podosome;GO:0005623//cell;GO:0005737//cytoplasm;GO:0005856//cytoskeleton;GO:0005886//plasma membrane;GO:0005903//brush border;GO:0030054//cell junction;GO:0032991//protein-containing complex;GO:0042995//cell projection	GO:0003779//actin binding;GO:0005509//calcium ion binding;GO:0046872//metal ion binding;GO:0051015//actin filament binding	GO:0008285//negative regulation of cell proliferation;GO:0032330//regulation of chondrocyte differentiation;GO:0042989//sequestering of actin monomers;GO:0043065//positive regulation of apoptotic process;GO:0045654//positive regulation of megakaryocyte differentiation;GO:0051014//actin filament severing;GO:0051127//positive regulation of actin nucleation;GO:0051693//actin filament capping
ENSMUST00000103381	137365.734375	124299.1796875	278447.5	626575.1875	602458.8125	621884.3125	180037.471354167	616972.770833333	1.77690961243079	0.00343621125444906	0.0466879863969452	Igkv8-27	immunoglobulin kappa chain variable 8-27 [Source:MGI Symbol;Acc:MGI:4439868]	-	-	-	-	GO:0005615//extracellular space	-	GO:0002377//immunoglobulin production;GO:0006955//immune response
ENSMUST00000037299	24152.62109375	46529.58984375	52725.1328125	18861.517578125	14781.27734375	14433.9375	41135.78125	16025.5774739583	-1.36001749880509	0.00345597596915232	0.0467478349427337	Ythdf1	YTH N6-methyladenosine RNA binding protein 1 [Source:MGI Symbol;Acc:MGI:1917431]	-	-	-	-	GO:0005575//cellular_component;GO:0005737//cytoplasm	GO:0003723//RNA binding;GO:0043022//ribosome binding;GO:1990247//N6-methyladenosine-containing RNA binding	GO:0002376//immune system process;GO:0002577//regulation of antigen processing and presentation;GO:0007612//learning;GO:0007613//memory;GO:0045727//positive regulation of translation;GO:0045948//positive regulation of translational initiation;GO:1900271//regulation of long-term synaptic potentiation;GO:1902667//regulation of axon guidance
ENSMUST00000108876	24152.62109375	46529.58984375	52725.1328125	18861.517578125	14781.27734375	14433.9375	41135.78125	16025.5774739583	-1.36001749880509	0.00345597596915232	0.0467478349427337	Ythdf1	YTH N6-methyladenosine RNA binding protein 1 [Source:MGI Symbol;Acc:MGI:1917431]	-	-	-	-	-	GO:0003723//RNA binding	-
ENSMUST00000047503	22283.08984375	58823.84375	64896.2265625	16258.4140625	38265.0703125	29445.44921875	48667.7200520833	27989.64453125	-0.798072025145318	0.00356322852669148	0.0478794084811722	Rgl2	ral guanine nucleotide dissociation stimulator-like 2 [Source:MGI Symbol;Acc:MGI:107483]	Environmental Information Processing	Signal transduction	ko04014//Ras signaling pathway	K17636	-	GO:0005085//guanyl-nucleotide exchange factor activity;GO:0005089//Rho guanyl-nucleotide exchange factor activity	GO:0007165//signal transduction;GO:0007264//small GTPase mediated signal transduction;GO:0010667//negative regulation of cardiac muscle cell apoptotic process;GO:0014068//positive regulation of phosphatidylinositol 3-kinase signaling;GO:0032485//regulation of Ral protein signal transduction
ENSMUST00000091403	40147.08984375	51618.48046875	55885.1953125	131211.171875	156680.484375	139889.703125	49216.921875	142593.786458333	1.53468478084986	0.00368399804447771	0.0492359449306737	Arsb	arylsulfatase B [Source:MGI Symbol;Acc:MGI:88075]	Metabolism;Cellular Processes;Metabolism	Global and overview maps;Transport and catabolism;Glycan biosynthesis and metabolism	ko01100//Metabolic pathways;ko04142//Lysosome;ko00531//Glycosaminoglycan degradation	K01135;K01135;K01135	GO:0005739//mitochondrion;GO:0005764//lysosome;GO:0005791//rough endoplasmic reticulum;GO:0005794//Golgi apparatus;GO:0009986//cell surface	GO:0003824//catalytic activity;GO:0003943//N-acetylgalactosamine-4-sulfatase activity;GO:0008484//sulfuric ester hydrolase activity	GO:0006914//autophagy;GO:0007417//central nervous system development;GO:0007584//response to nutrient;GO:0009268//response to pH;GO:0010632//regulation of epithelial cell migration;GO:0010976//positive regulation of neuron projection development;GO:0043627//response to estrogen;GO:0051597//response to methylmercury;GO:0061580//colon epithelial cell migration
ENSMUST00000103323	102776.546875	73164.7890625	410106.875	2099686.5	265149.3125	670894.0625	195349.403645833	1011909.95833333	2.37295216555903	0.0036884492998829	0.0492359449306737	Igkv16-104	immunoglobulin kappa variable 16-104 [Source:MGI Symbol;Acc:MGI:2685913]	-	-	-	-	GO:0005615//extracellular space	-	GO:0002377//immunoglobulin production;GO:0006955//immune response
ENSMUST00000027754	53682.1796875	115900.421875	98206.4375	222805.53125	172235.78125	167668.796875	89263.0130208333	187570.036458333	1.07129497180944	0.00372932194837019	0.0495641543662213	Ncf2	neutrophil cytosolic factor 2 [Source:MGI Symbol;Acc:MGI:97284]	Cellular Processes;Human Diseases;Organismal Systems;Human Diseases;Organismal Systems	Transport and catabolism;Cardiovascular diseases;Immune system;Infectious diseases;Development	ko04145//Phagosome;ko05418//Fluid shear stress and atherosclerosis;ko04670//Leukocyte transendothelial migration;ko05140//Leishmaniasis;ko04380//Osteoclast differentiation	K08010;K08010;K08010;K08010;K08010	GO:0001669//acrosomal vesicle;GO:0005730//nucleolus;GO:0005737//cytoplasm;GO:0005829//cytosol;GO:0016020//membrane;GO:0043020//NADPH oxidase complex	GO:0005515//protein binding;GO:0008022//protein C-terminus binding;GO:0016175//superoxide-generating NADPH oxidase activity;GO:0016176//superoxide-generating NADPH oxidase activator activity;GO:0048365//Rac GTPase binding	GO:0006742//NADP catabolic process;GO:0006801//superoxide metabolic process;GO:0006909//phagocytosis;GO:0009749//response to glucose;GO:0014070//response to organic cyclic compound;GO:0032496//response to lipopolysaccharide;GO:0032870//cellular response to hormone stimulus;GO:0042554//superoxide anion generation;GO:0043085//positive regulation of catalytic activity;GO:0043525//positive regulation…
ENSMUST00000186568	53682.1796875	115900.421875	98206.4375	222805.53125	172235.78125	167668.796875	89263.0130208333	187570.036458333	1.07129497180944	0.00372932194837019	0.0495641543662213	Ncf2	neutrophil cytosolic factor 2 [Source:MGI Symbol;Acc:MGI:97284]	Cellular Processes;Human Diseases;Organismal Systems;Human Diseases;Organismal Systems	Transport and catabolism;Cardiovascular diseases;Immune system;Infectious diseases;Development	ko04145//Phagosome;ko05418//Fluid shear stress and atherosclerosis;ko04670//Leukocyte transendothelial migration;ko05140//Leishmaniasis;ko04380//Osteoclast differentiation	K08010;K08010;K08010;K08010;K08010	GO:0001669//acrosomal vesicle;GO:0005730//nucleolus;GO:0005737//cytoplasm;GO:0005829//cytosol;GO:0016020//membrane;GO:0043020//NADPH oxidase complex	GO:0005515//protein binding;GO:0008022//protein C-terminus binding;GO:0016175//superoxide-generating NADPH oxidase activity;GO:0016176//superoxide-generating NADPH oxidase activator activity;GO:0048365//Rac GTPase binding	GO:0006742//NADP catabolic process;GO:0006801//superoxide metabolic process;GO:0006909//phagocytosis;GO:0009749//response to glucose;GO:0014070//response to organic cyclic compound;GO:0032496//response to lipopolysaccharide;GO:0032870//cellular response to hormone stimulus;GO:0042554//superoxide anion generation;GO:0043085//positive regulation of catalytic activity;GO:0043525//positive regulation…
