# Supplementary material for: A Combined Transcriptomic and Proteomic Approach to Reveal the Effect of Mogroside V on OVA-Induced Pulmonary Inflammation in Mice
Source: Frontiers journal article supplement (doi:10.3389/fimmu.2022.800143), 2022-03-18
Supplement: Table_1.xlsx [file Table_1.xlsx]

## Sheet: Sheet1
K vs C up for DIA	K vs C up for mRNA		C vs V down for DIA	C vs V down for mrna	列1		K vs C down for DIA	K vs C down for mRNA
Arg1	Arg1		Arg1	Arg1			Pon1	Pon1
Chia1	Chia1		Chia1	Chia1			Ppbp	Ppbp
Chil3	Chil3		Chil3	Chil3
Chil4	Chil4		Chil4	Chil4
Clca1	Clca1		Clca1	Clca1
Cmpk2	Cmpk2		Cmpk2	Cmpk2
Fcgbp	Fcgbp		Fcgbp	Fcgbp			C vs V up for DIA	C vs V up for mRNA
Gatm	Gatm		Gatm	Gatm			Pon1	Pon1
Ifi44	Ifi44		Ifi44	Ifi44			Ppbp	Ppbp
Ifit1	Ifit1		Ifit1	Ifit1
Ifit3	Ifit3		Ifit3	Ifit3
Igha	Igha		Igha	Igha
Ighg1	Ighg1		Ighg1	Ighg1
Igkc	Igkc		Igkc	Igkc
Igkv4-55	Igkv4-55		Igkv4-55	Igkv4-55
Igkv8-28	Igkv8-28		Igkv8-28	Igkv8-28
Iigp1	Iigp1		Iigp1	Iigp1
Jchain	Jchain		Jchain	Jchain
Lgals3	Lgals3		Lgals3	Lgals3
Mndal	Mndal		Mndal	Mndal
Muc5ac	Muc5ac		Muc5ac	Muc5ac
Mzb1	Mzb1		Mzb1	Mzb1
Parp14	Parp14		Parp14	Parp14
Pigr	Pigr		Pigr	Pigr
Pml	Pml		Pml	Pml
Prg2	Prg2		Prg2	Prg2
Psap	Psap		Psap	Psap
Scin	Scin		Scin	Scin
Serpina3g	Serpina3g		Serpina3g	Serpina3g
Siglec1	Siglec1		Siglec1	Siglec1
Stat1	Stat1		Stat1	Stat1
Zbp1	Zbp1		Zbp1	Zbp1
